# Supplementary material
Source: PubMed Central journal article supplement (PMC3962850)

# Deletion maps of 4,836 mutants

These image files describe the chromosomal mapping of deletion mutants in detail with schematic drawings for deletion primers and check-PCR primers along chromosome.

For more detailed information such as sequences of check -PCR primers, estimated PCR size and deletion rate (KO%), see our website of deletion mutants:

<http://pombe.kaist.ac.kr/nbtsupp/> .

※ Screenshot of the website

The screenshot shows a web browser window displaying the website. The title bar reads "Analysis of a genome-wide set of gene deletions in the fission yeast Schizosaccharomyces pombe - Windows Internet Explorer". The address bar shows "http://pombe.kaist.ac.kr/nbtsupp/index.html". The main content area features the following text:

## Web supplement to "Analysis of a genome-wide set of gene deletions in the fission yeast *Schizosaccharomyces pombe*"

Dong-Uk Kim<sup>1,14</sup>, Jacqueline Hayles<sup>2,14</sup>, Dongsup Kim<sup>3,14</sup>, Valerie Wood<sup>2,4,14</sup>, Han-Oh Park<sup>5,14</sup>, Misun Won<sup>1,14</sup>, Hyang-Sook Yoo<sup>1,14</sup>, Trevor Duhig<sup>2</sup>, Mivoung Nam<sup>1</sup>, Georgia Palmer<sup>2</sup>, Sanjio Han<sup>3</sup>, Linda Jeffery<sup>2</sup>, Seung-Tae Baek<sup>1</sup>, Hyeon Lee<sup>1</sup>, Young Sam Shim<sup>1</sup>, Minho Lee<sup>3</sup>, Lila Kim<sup>1</sup>, Kyung-Sun Heo<sup>1</sup>, Eun Joo Noh<sup>1</sup>, Ah-Reum Lee<sup>1</sup>, Young-Joo Jang<sup>1</sup>, Kyung-Sook Chung<sup>1</sup>, Shin-Jung Choi<sup>1</sup>, Jo-Young Park<sup>1</sup>, Youngwoo Park<sup>1</sup>, Hwan Mook Kim<sup>6</sup>, Song-Kyu Park<sup>6</sup>, Hae-Joon Park<sup>2</sup>, Eun-Jung Kang<sup>2</sup>, Hyong Bai Kim<sup>7</sup>, Hyun-Sam Kang<sup>8</sup>, Hee-Moon Park<sup>9</sup>, Kyunghoon Kim<sup>10</sup>, Kiwon Song<sup>11</sup>, Kyung Bin Song<sup>12</sup>, Paul Nurse<sup>2,13</sup> and Kwang-Lae Hoe<sup>1,6</sup>

<sup>1</sup>Integrative Omics Research Centre, Korea Research Institute of Bioscience and Biotechnology (KRIBB), Yuseong, Daejeon, Korea <sup>2</sup>Cancer Research UK, The London Research Institute, 44, Lincoln's Inn Fields, London WC2A 3PX, UK <sup>3</sup>Department of Bio and Brain Engineering, Korea Advanced Institute of Science & Technology (KAIST), Yuseong, Daejeon, Korea <sup>4</sup>Wellcome Trust Sanger Institute, Wellcome Trust Genome Campus, Hinxton, Cambridge, CB10 1HH, UK <sup>5</sup>Bioneer Corporation, Daejeon, Korea <sup>6</sup>Bio-Evaluation Centre, Korea Research Institute of Bioscience and Biotechnology (KRIBB), Yuseong, Daejeon, Korea <sup>7</sup>Department of Bioinformatics & Biotechnology, Korea University, Jochiwon, Chungnam, Korea <sup>8</sup>School of Biological Sciences, Seoul National University, Seoul, Korea <sup>9</sup>Department of Microbiology, Chungnam National University, Yuseong, Daejeon, Korea <sup>10</sup>Division of Life Sciences, Kangwon National University, Chuncheon, Kangwon, Korea <sup>11</sup>Department of Biochemistry, Yonsei University, Seoul, Korea <sup>12</sup>Department of Food and Nutrition, Chungnam National University, Yuseong, Daejeon, Korea <sup>13</sup>The Rockefeller University, 1230 York Avenue, New York, NY 10021-6399, USA <sup>14</sup>These authors contributed equally to this work.

Correspondence and requests for material should be addressed to K.H. (e-mail: kwanghoe@kribb.re.kr) or P.N. (e-mail: nurse@mail.rockefeller.edu).

Home | Paper download | Supplementary Materials | Data download

|                                                                                     |                |  |
|-------------------------------------------------------------------------------------|----------------|--|
| <b>Interactive queries</b>                                                          | <b>Summary</b> |  |
| Enter gene or mutant code name, and press enter:<br>cdc2<br>(e.g. SPAC1001 or cdc2) |                |  |
| <a href="#">Download paper</a>                                                      |                |  |
| <a href="#">Supplementary Materials</a>                                             |                |  |

We report the construction and analysis of 4,836 heterozygous diploid deletion mutants covering 98.4% of the fission yeast genome. This resource provides a powerful tool for biotechnological and eukaryotic cell biology research. Comprehensive gene dispensability comparisons with budding yeast, the first time such studies have been possible between two eukaryotes, revealed that 83% of single copy

Search result of cdc2 - Windows Internet Explorer

http://pombe.kaist.ac.kr/qSPOM/qsearch2.pl?keyword=cdc2

Search result of cdc2

Legends: Mutant code (wcode), knockout% (ko), construction method (meth), confidence by sequencing (confi), colony PCR primers (cp5 for N-terminal, cp3 for C-terminal)

| systemic ID  | gname | gdesc                                           | wcode   | ko | meth   | confi   | cp5                        | cp3                       | Mapping                                         |
|--------------|-------|-------------------------------------------------|---------|----|--------|---------|----------------------------|---------------------------|-------------------------------------------------|
| SPBC11B10.09 | cdc2  | cyclin-dependent protein kinase Cdc2            | c78     | 99 | serial | Perfect | ACAACTCAGGATAATCCAACCTACC  | AAGAAAAAGGGAGATTAAGGCTT   | <a href="#">View</a><br><a href="#">Mapping</a> |
| SPBC1347.10  | cdc23 | MCM-associated protein Mcm10                    | h63     | 99 | serial | Perfect | ATGCACTACATTTGCATCCTTAA    | GTGTCGACAGTACCTCAGTTGGCT  | <a href="#">View</a><br><a href="#">Mapping</a> |
| SPBC25H2.13c | cdc20 | DNA polymerase epsilon catalytic subunit a Pol2 | h65     | 99 | serial | Perfect | TCAATCCTTAAAGGAAGCAATATCG  | GAGGACCTCCAAGCGACATTCTATT | <a href="#">View</a><br><a href="#">Mapping</a> |
| SPCC16A11.17 | cdc21 | MCM complex subunit Cdc21                       | h64     | 99 | serial | Medium  | AGATTCGACCTTCAAATACAACCTGG | TATTTATGCTCCACGATATCTCGG  | <a href="#">View</a><br><a href="#">Mapping</a> |
| SPAC24H6.05  | cdc25 | serine/threonine protein phosphatase Cdc25      | c77-0-0 | 97 | block  | Perfect | TCITTCATTTTTTTCTTCAACGACA  | AACGTAAGCAACTCAGITTCATCG  | <a href="#">View</a><br><a href="#">Mapping</a> |
| SPAC8F11.07c | cdc24 | DNA replication protein Cdc24                   | h62     | 97 | block  | High    | TCATCGCACGTTGGTTCTTCTTAGT  | TTTCCAATAGAAACCTTATCGAAGC | <a href="#">View</a><br><a href="#">Mapping</a> |
| SPBC1734.02c | cdc27 | DNA polymerase delta subunit Cdc27              | w3245-0 | 97 | block  | High    | GCTATCAGCTTAAAAGCAGAAGGAA  | GCTTTCCTCTTGATTAGCATT     | <a href="#">View</a><br><a href="#">Mapping</a> |

http://pombe.kaist.ac.kr/qSPOM/view.php?id=S...

|                                    |                                      |
|------------------------------------|--------------------------------------|
| <b>Systemic ID</b>                 | <a href="#">SPBC11B10.09</a>         |
| <b>Gene name</b>                   | cdc2                                 |
| <b>Gene product</b>                | cyclin-dependent protein kinase Cdc2 |
| <b>KO%</b>                         | 99                                   |
| <b>Construction method</b>         | Serial PCR                           |
| <b>Barcode sequence (Up tag)</b>   | CCTGTGTCTGGGCACCTGCG                 |
| <b>Barcode sequence (Down tag)</b> | GGGGCTTGGGGTACGTGAGG                 |
| <b>cp5</b>                         | ACAACTCAGGATAATCCAACCTACC            |
| <b>cp3</b>                         | AAGAAAAAGGGAGATTAAGGCTT              |
| <b>PCR length (cp5, cp-N1)</b>     | 1212                                 |
| <b>PCR length (cp5, cp-N10)</b>    | 1331                                 |
| <b>PCR length (cp3, cp-C1)</b>     | 1094                                 |
| <b>PCR length (cp3, cp-C3)</b>     | 1072                                 |

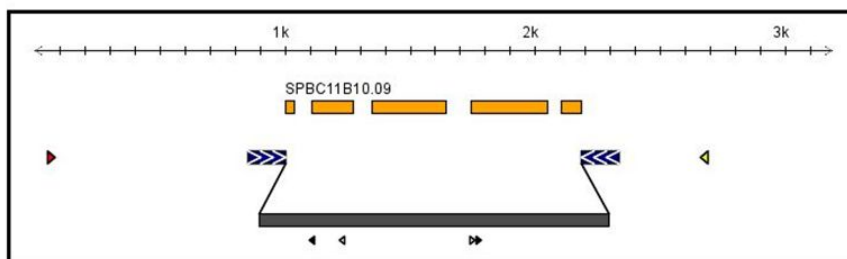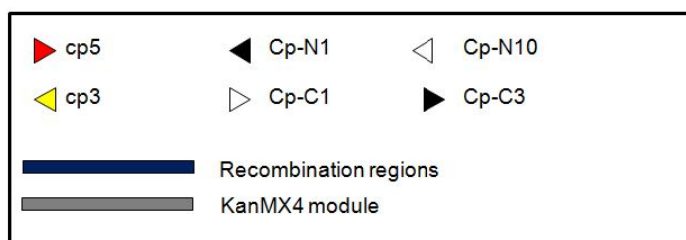

Schematic deletion  
maps of  
4,836 mutants

SPAC10F6.01c

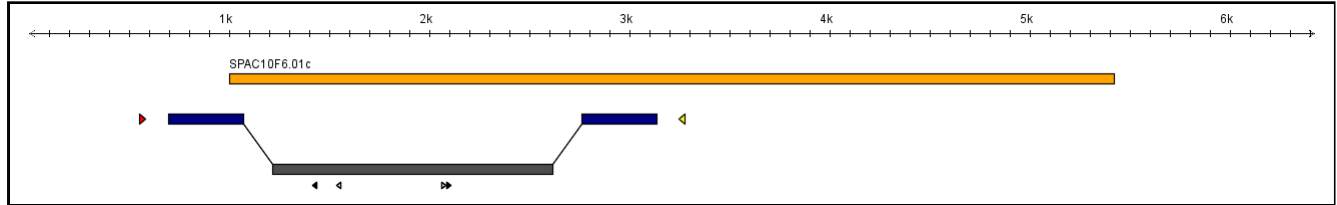

SPAC10F6.03c

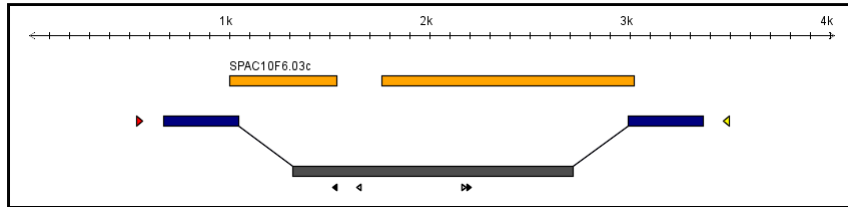

SPAC10F6.04

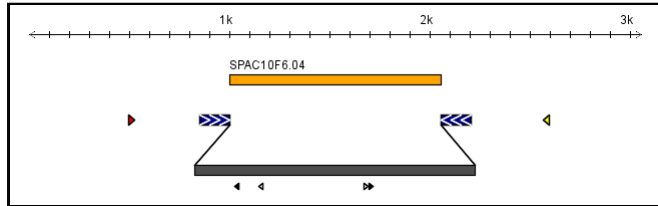

SPAC10F6.05c

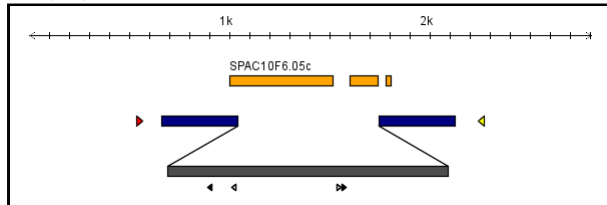

SPAC10F6.06

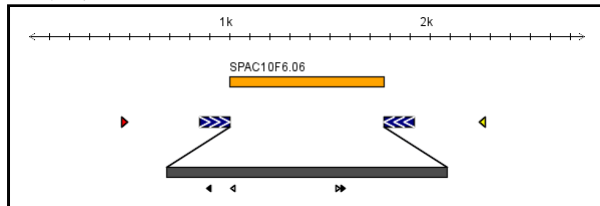

SPAC10F6.07c

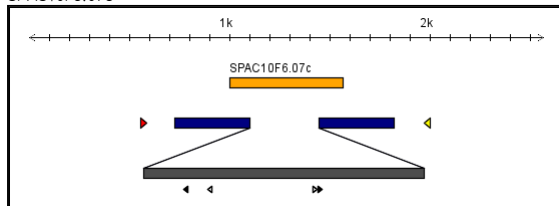

SPAC10F6.08c

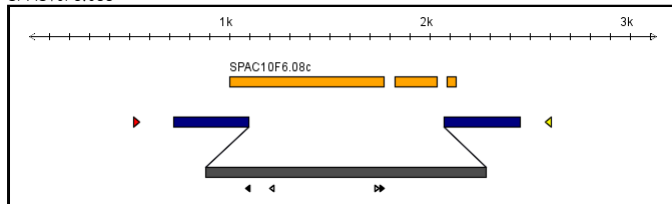

SPAC10F6.10

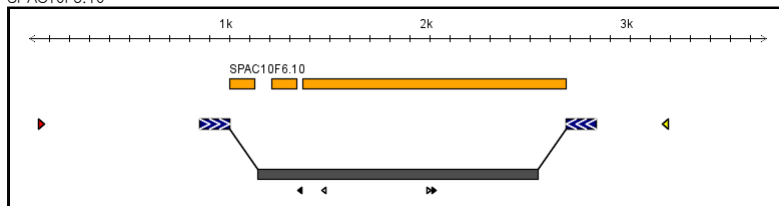

SPAC10F6.11c

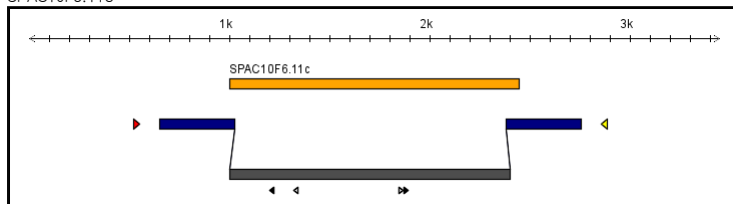



SPAC10F6.12c

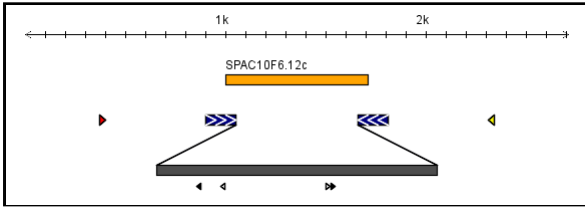

SPAC10F6.13c

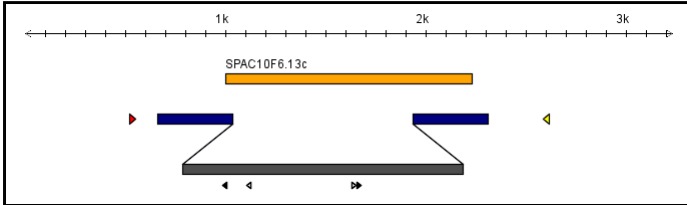

SPAC10F6.14c

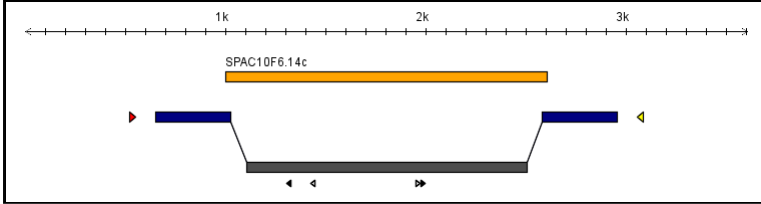

SPAC10F6.15

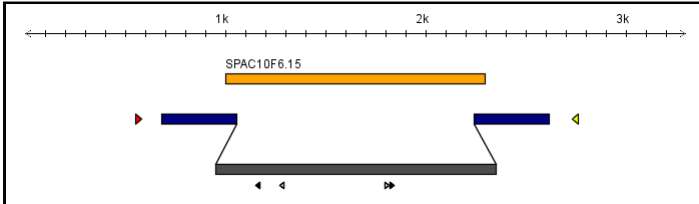

SPAC10F6.16

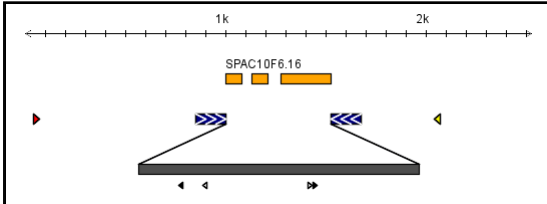

SPAC10F6.17c

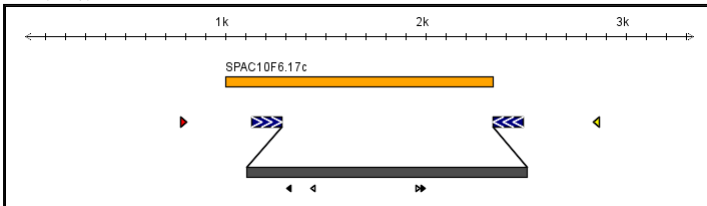

SPAC11D3.01c

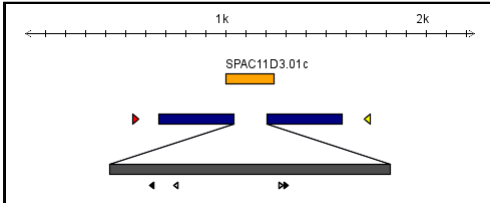

SPAC11D3.02c

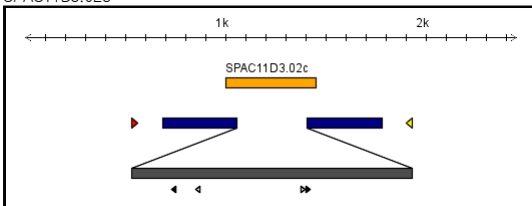

SPAC11D3.03c

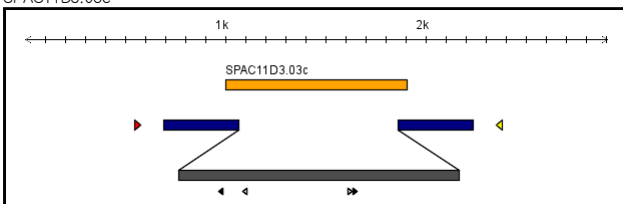

SPAC11D3.04c

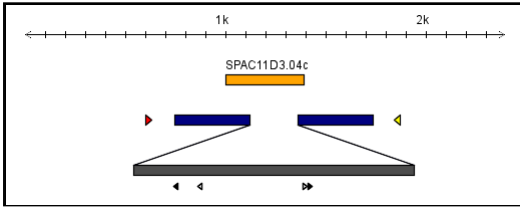

SPAC11D3.05

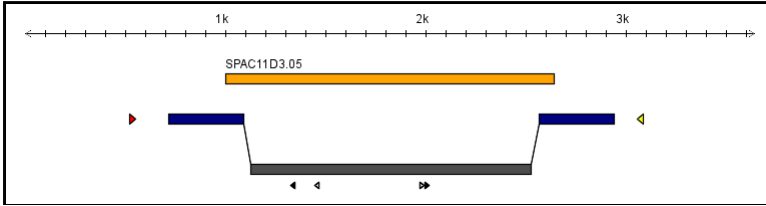

SPAC11D3.06

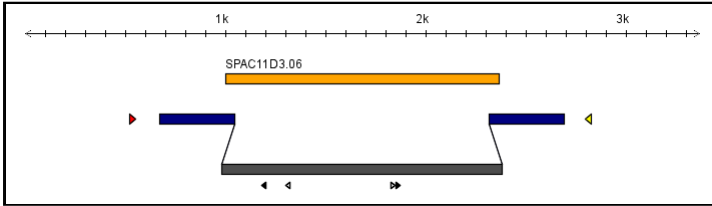

SPAC11D3.07c

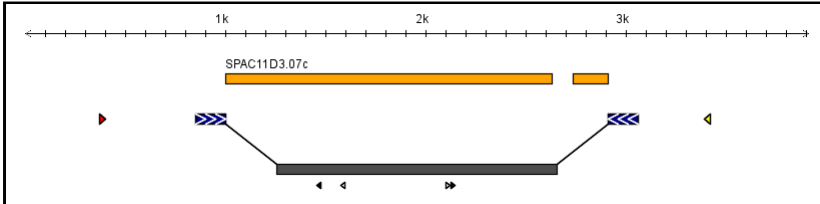

SPAC11D3.08c

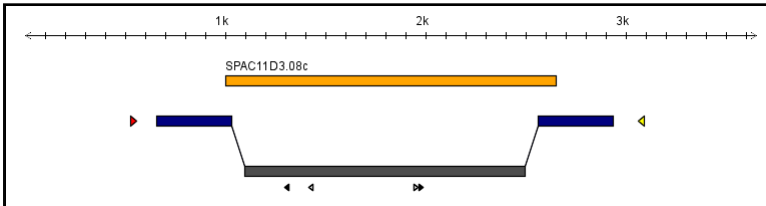

SPAC11D3.09

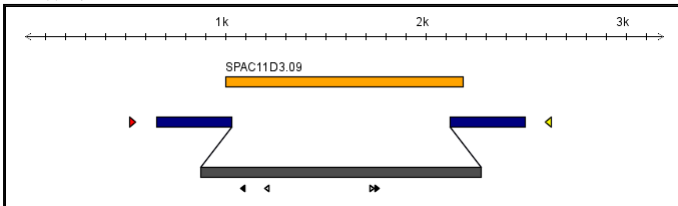

SPAC11D3.10

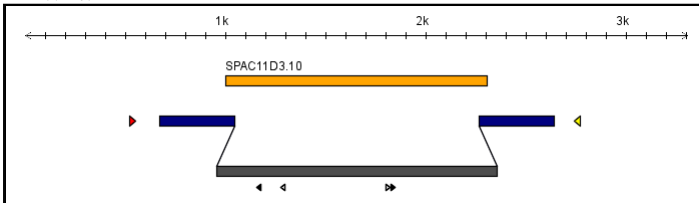

SPAC11D3.13

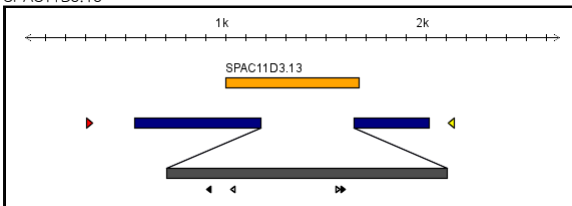

SPAC11D3.16c

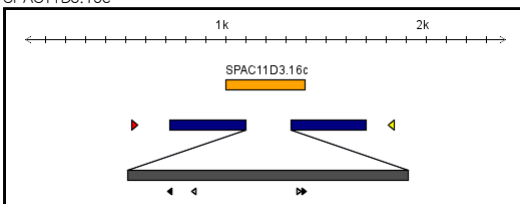

SPAC11D3.17

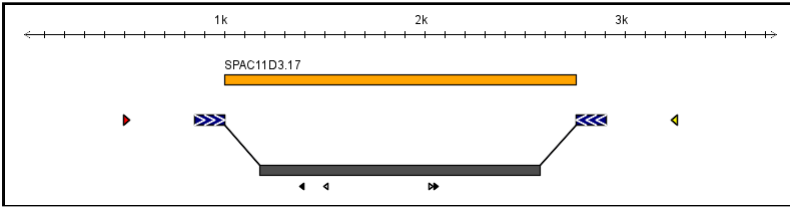

SPAC11D3.18c

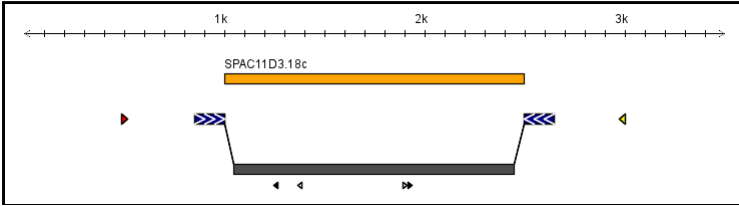

SPAC11E3.03

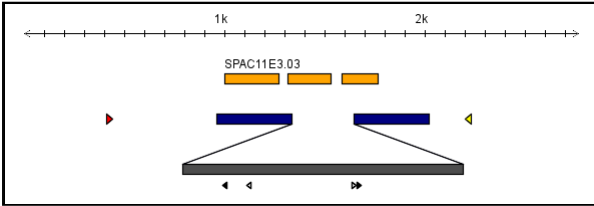

SPAC11E3.04c

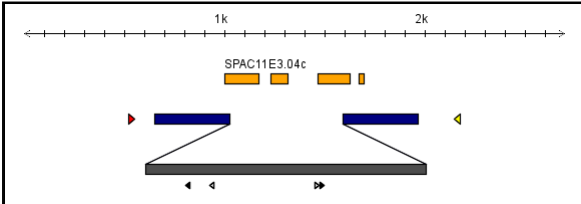

SPAC11E3.06

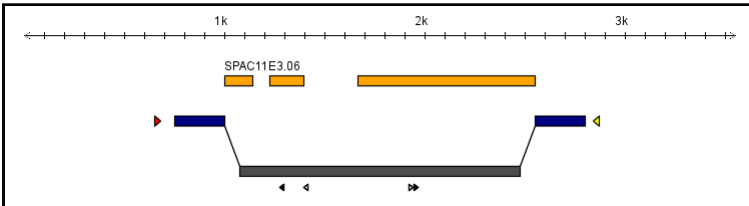

SPAC11E3.07

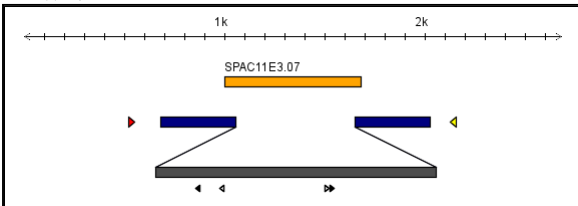

SPAC11E3.08c

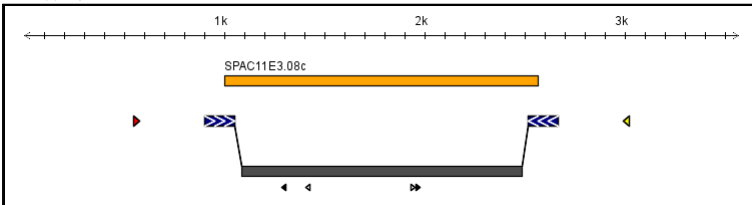

SPAC11E3.09

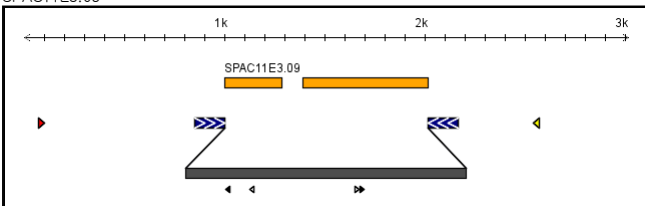

SPAC11E3.10

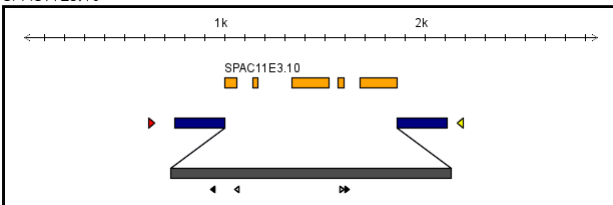

SPAC11E3.13c

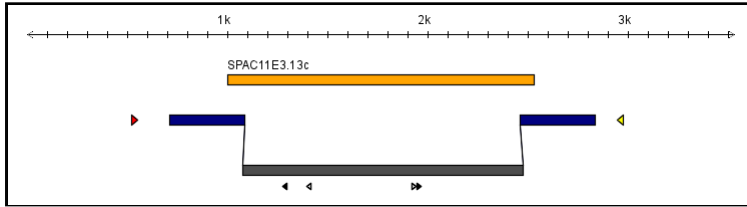

SPAC11E3.14

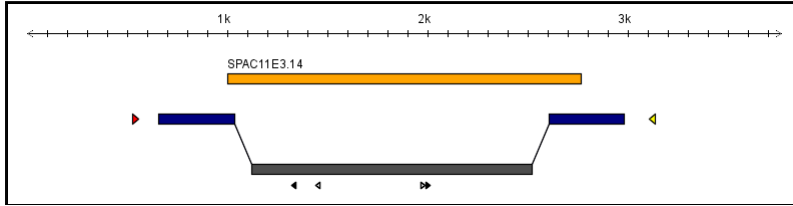

SPAC11E3.15

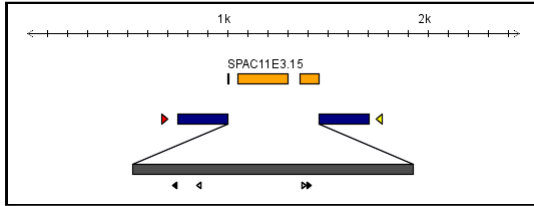

SPAC11G7.01

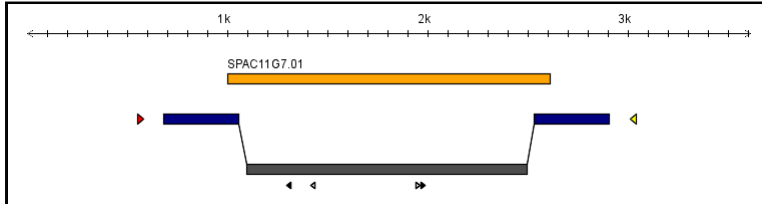

SPAC11G7.03

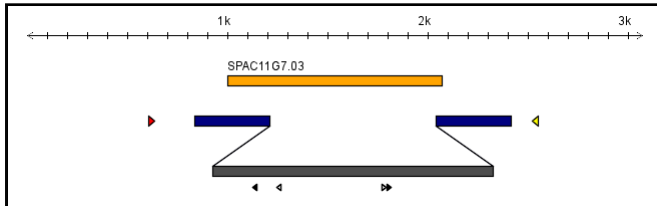

SPAC11G7.04

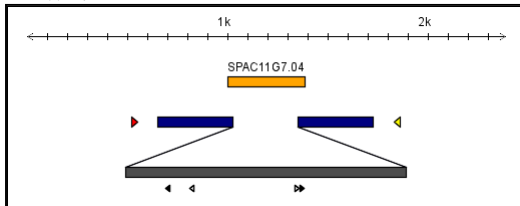

SPAC11G7.05c

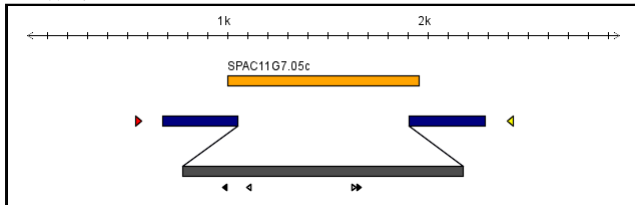

SPAC11G7.06c

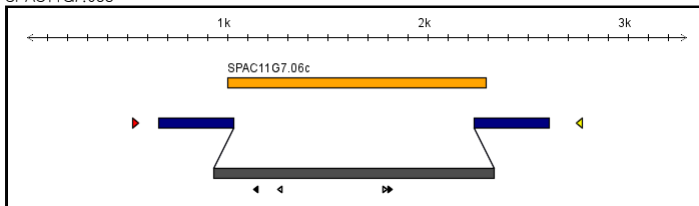

SPAC11H1.01

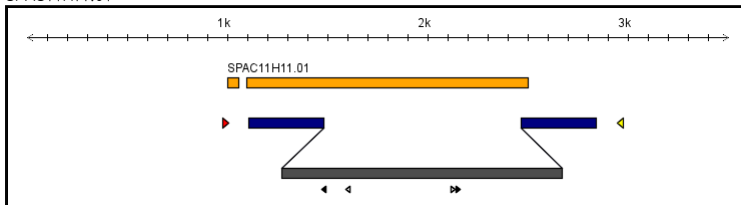

SPAC11H11.02c

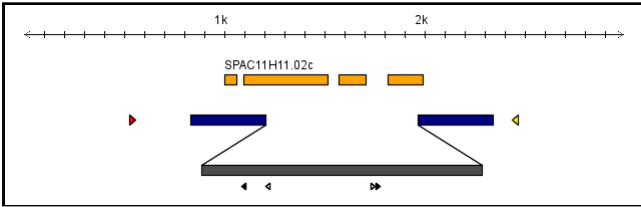

SPAC11H11.03c

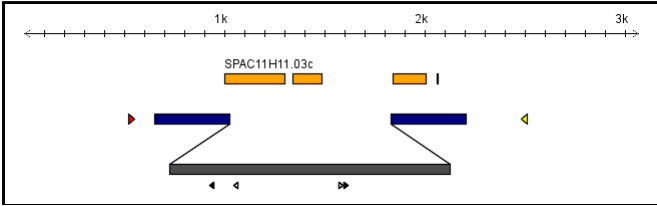

SPAC11H11.04

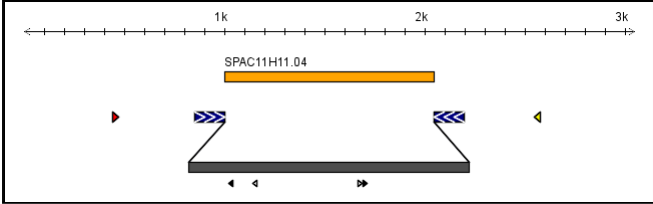

SPAC11H11.05c

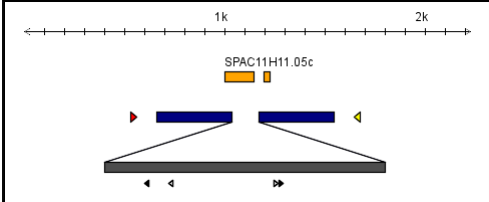

SPAC11H11.06

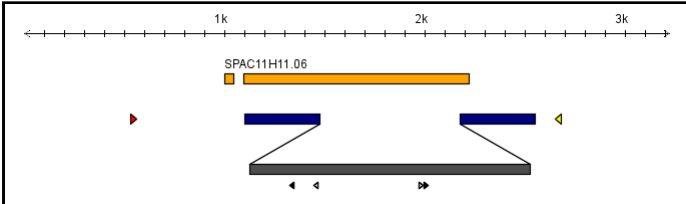

SPAC12B10.01c

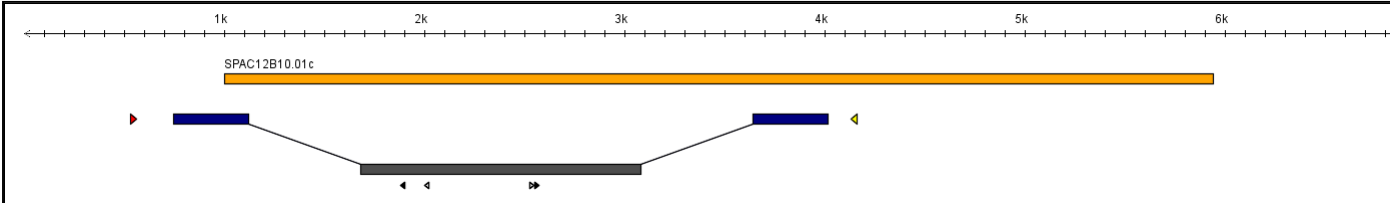

SPAC12B10.02c

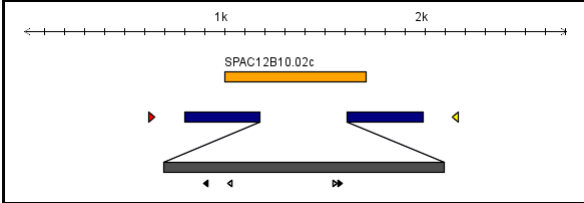

SPAC12B10.03

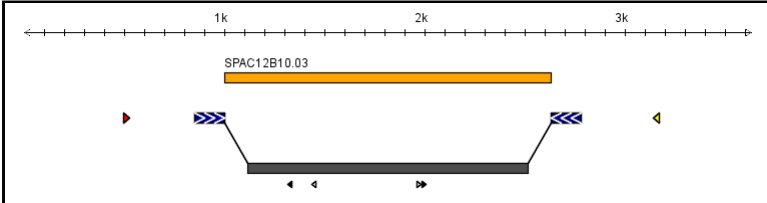

SPAC12B10.04

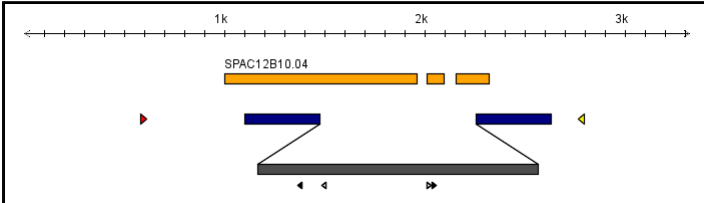

SPAC12B10.05

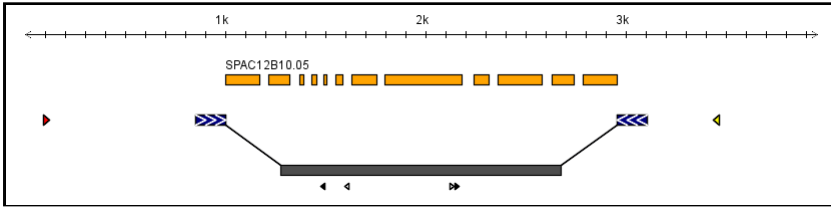

SPAC12B10.06c

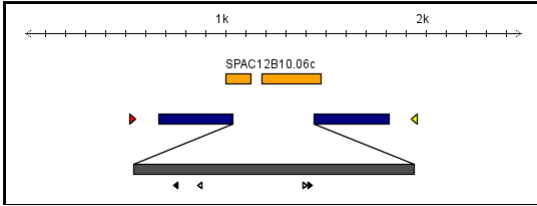

SPAC12B10.07

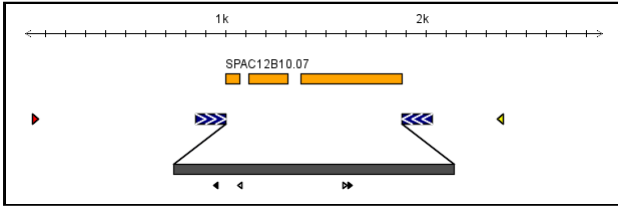

SPAC12B10.08c

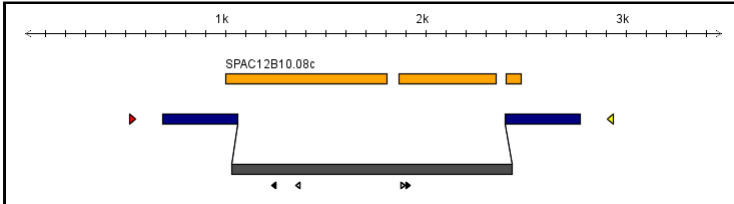

SPAC12B10.09

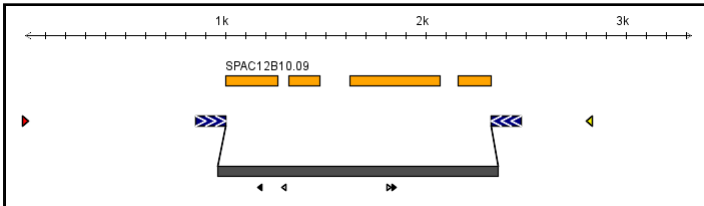

SPAC12B10.10

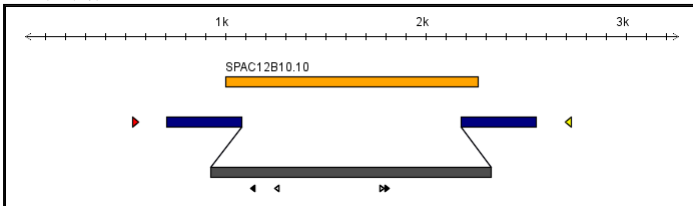

SPAC12B10.11

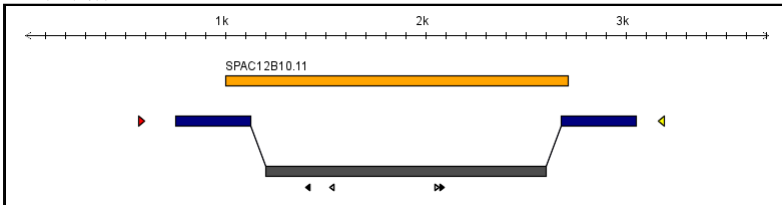

SPAC12B10.12c

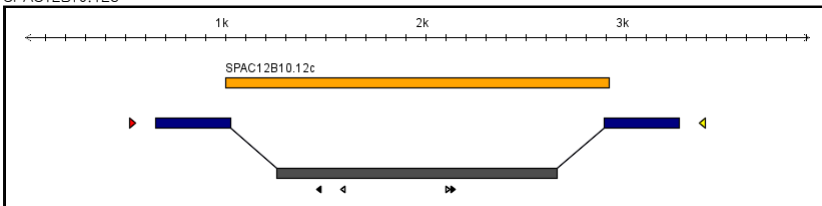

SPAC12B10.13

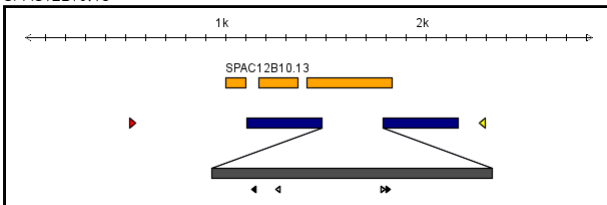



SPAC12B10.14c

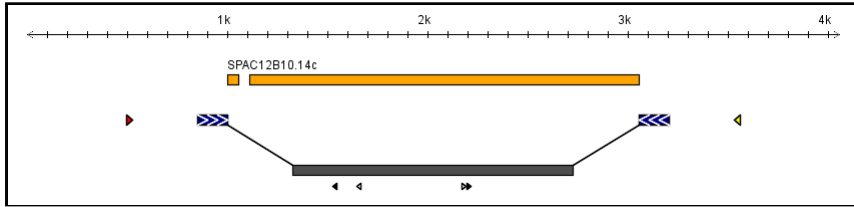

SPAC12B10.15c

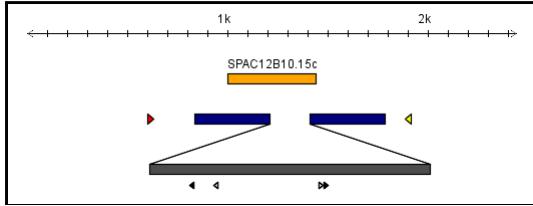

SPAC12B10.16c

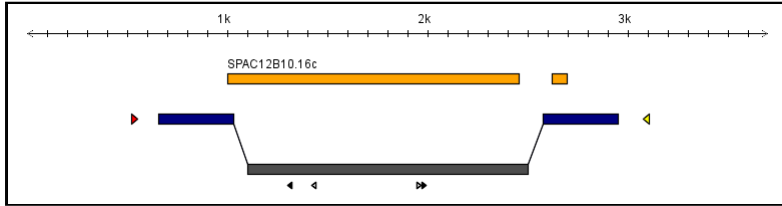

SPAC12G12.01c

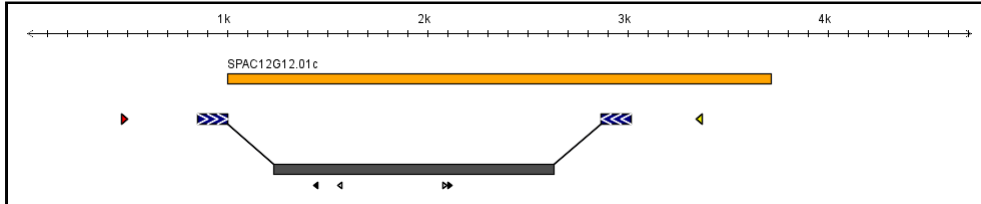

SPAC12G12.02

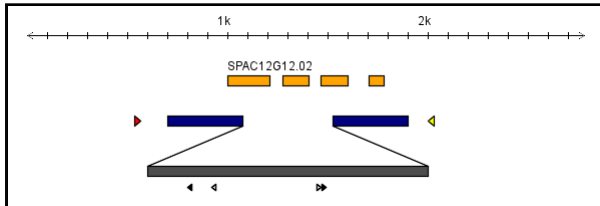

SPAC12G12.03

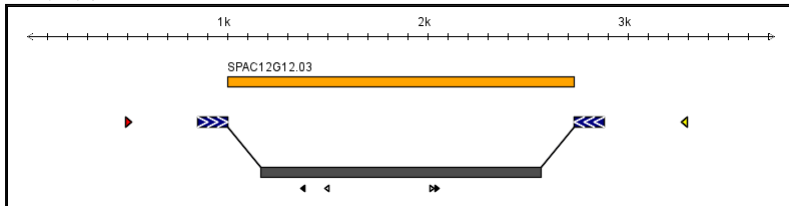

SPAC12G12.04

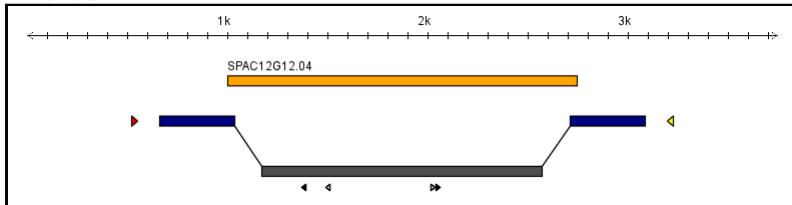

SPAC12G12.05c

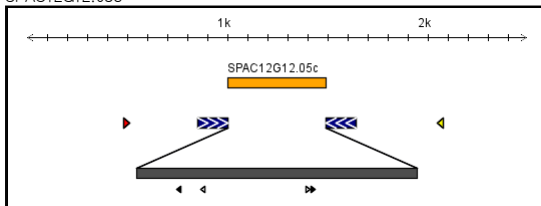

SPAC12G12.06c

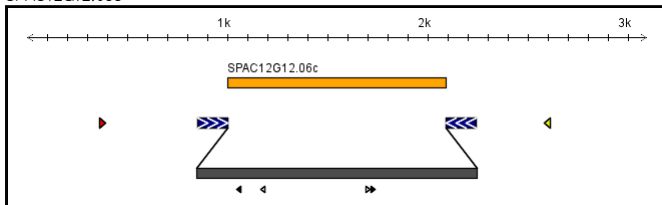

SPAC12G12.07c

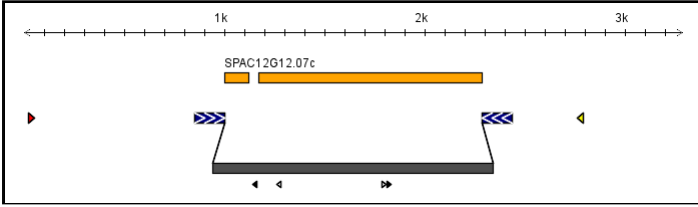

SPAC12G12.08

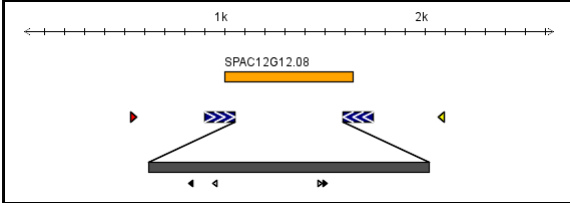

SPAC12G12.09

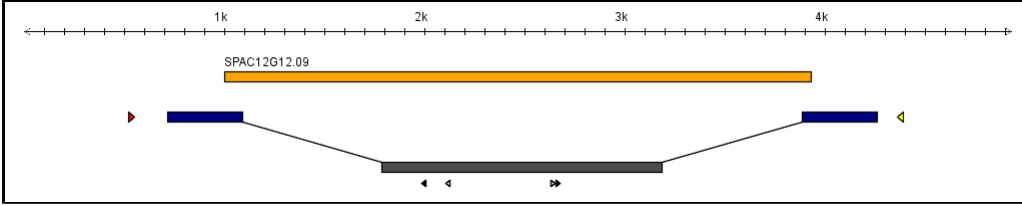

SPAC12G12.10

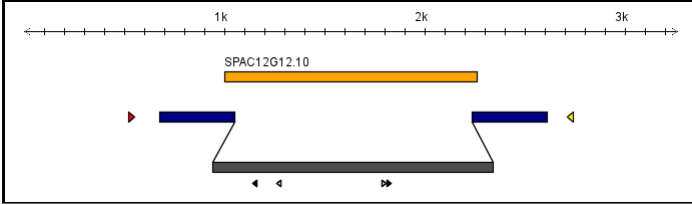

SPAC12G12.11c

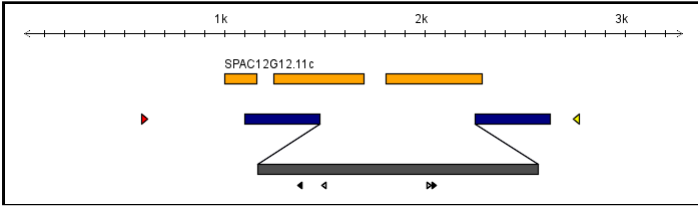

SPAC12G12.12

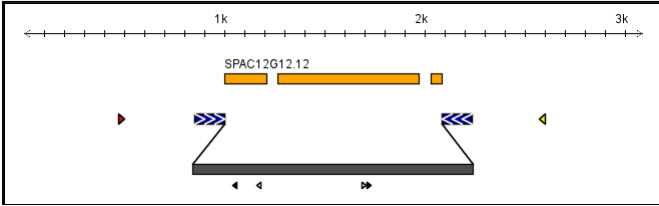

SPAC12G12.13c

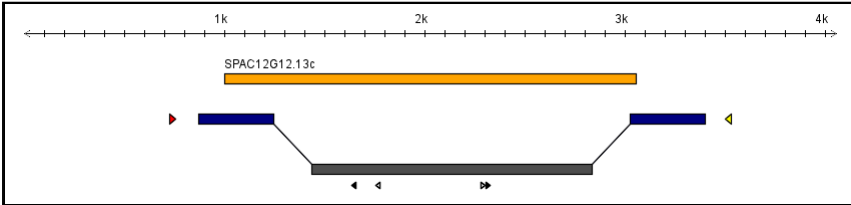

SPAC12G12.14c

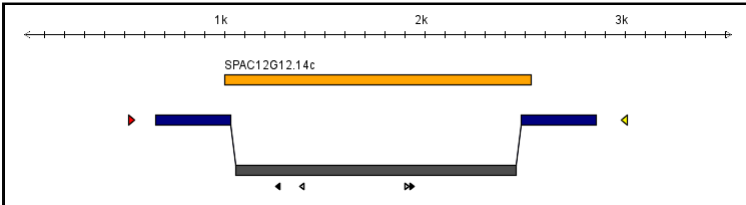

SPAC12G12.15

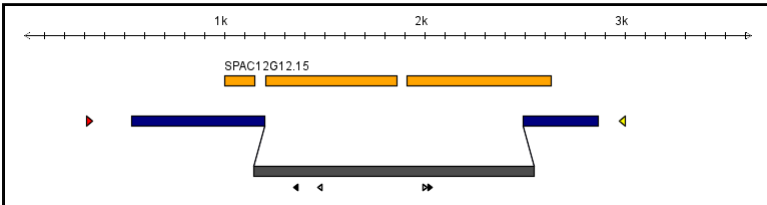

SPAC12G12.16c

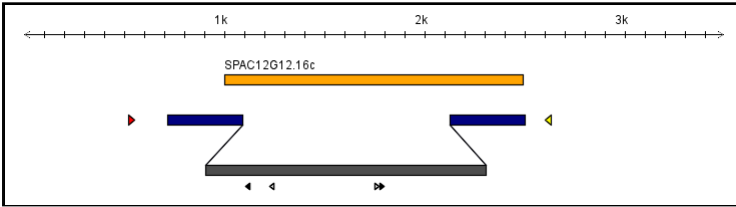

SPAC13A11.01c

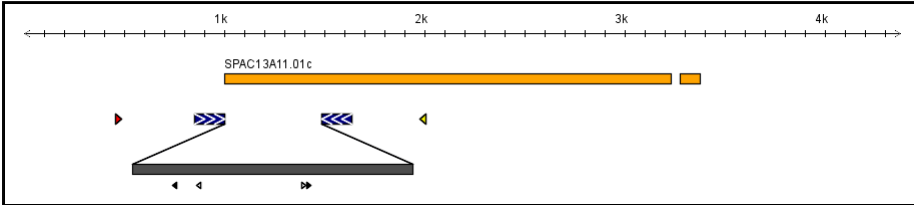

SPAC13A11.02c

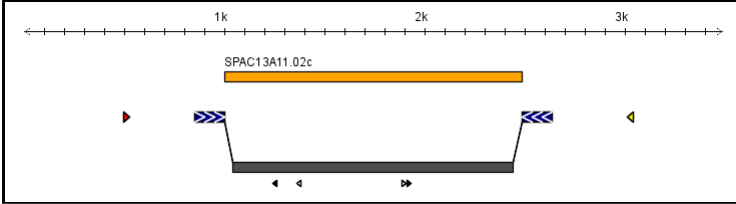

SPAC13A11.03

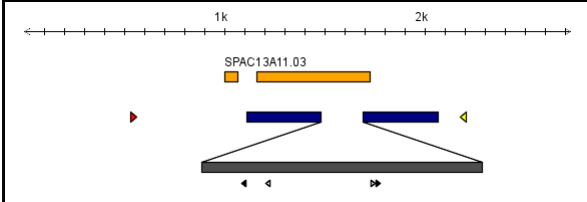

SPAC13A11.04c

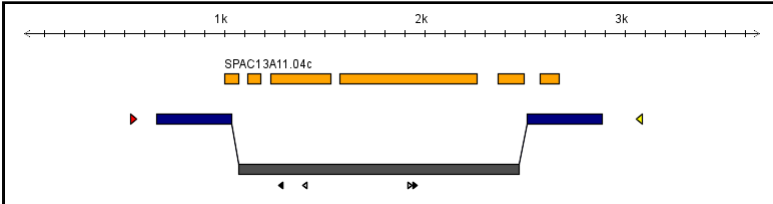

SPAC13A11.05

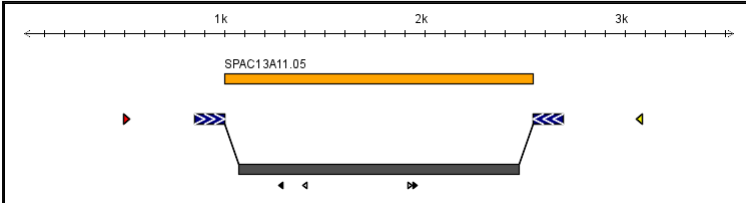

SPAC13A11.06

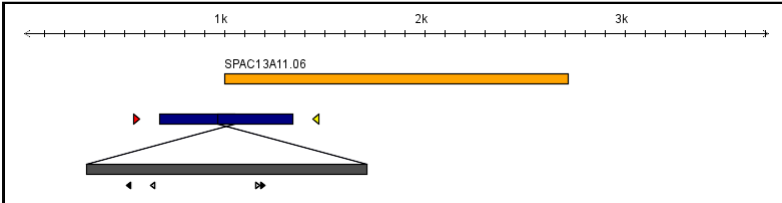

SPAC13C5.01c

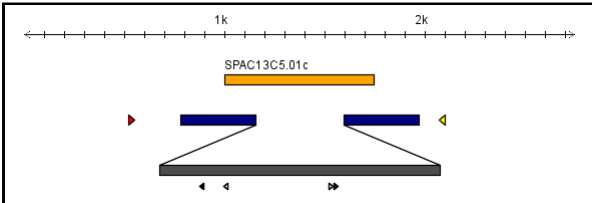

SPAC13C5.02

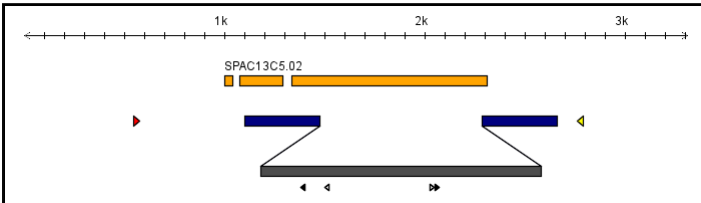

SPAC13C5.03

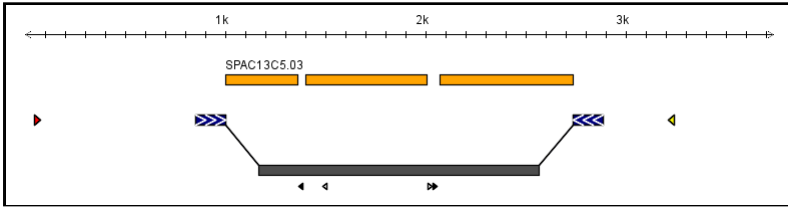

SPAC13C5.04

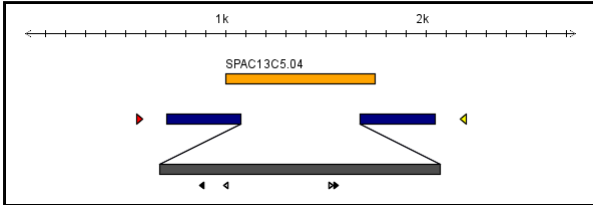

SPAC13C5.05c

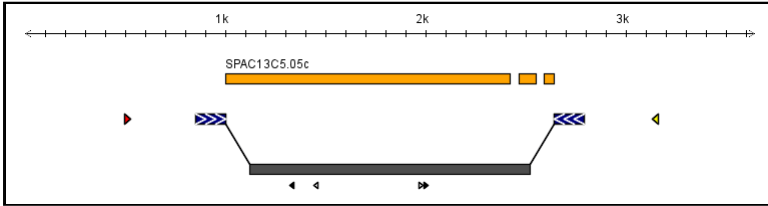

SPAC13C5.06c

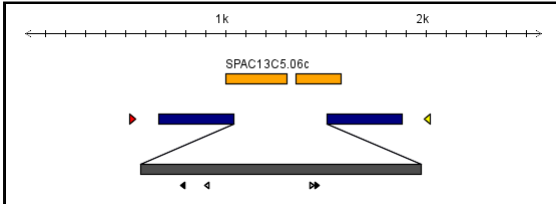

SPAC13C5.07

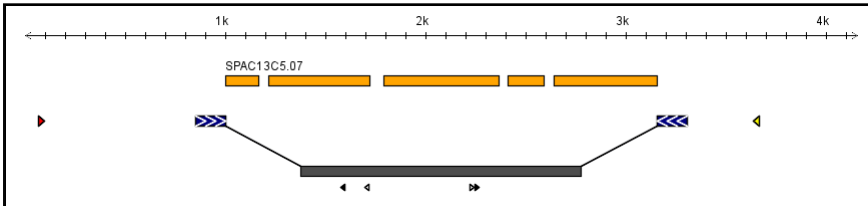

SPAC13D6.01

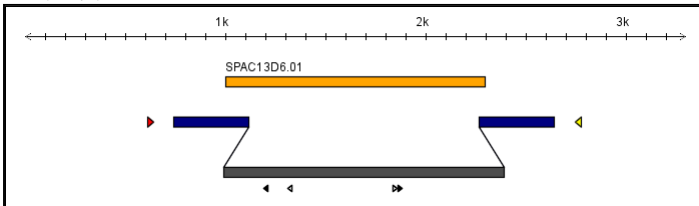

SPAC13D6.02c

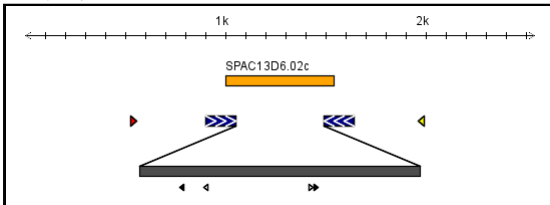

SPAC13D6.03c

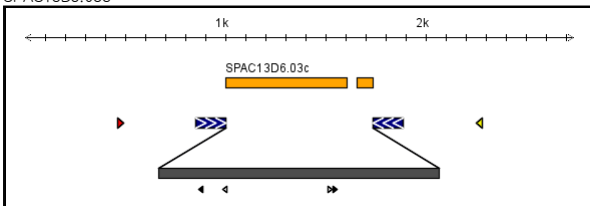

SPAC13D6.04c

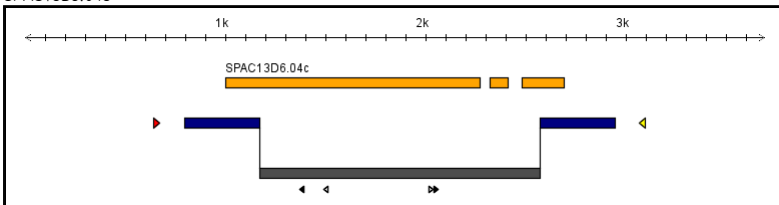

SPAC13D6.05

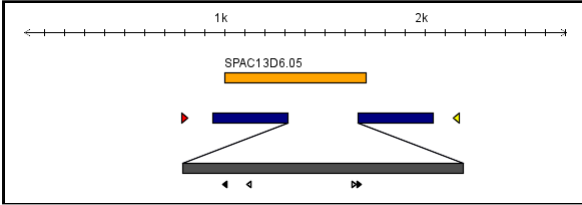

SPAC13F5.01c

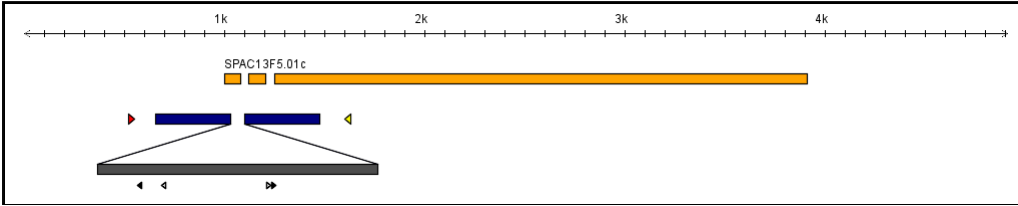

SPAC13F5.02c

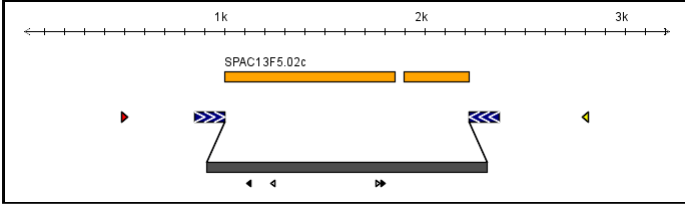

SPAC13F5.03c

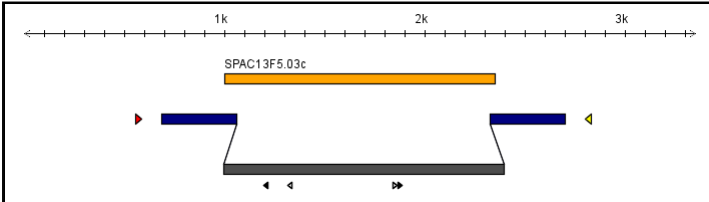

SPAC13F5.04c

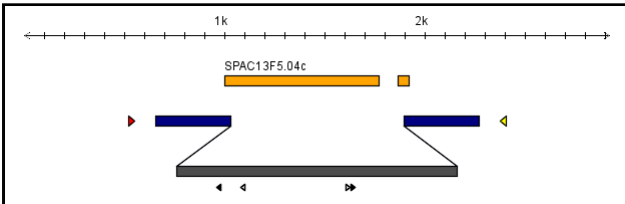

SPAC13F5.05

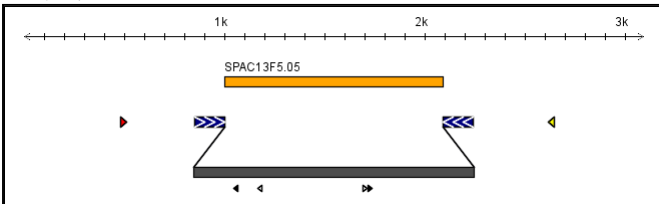

SPAC13F5.06c

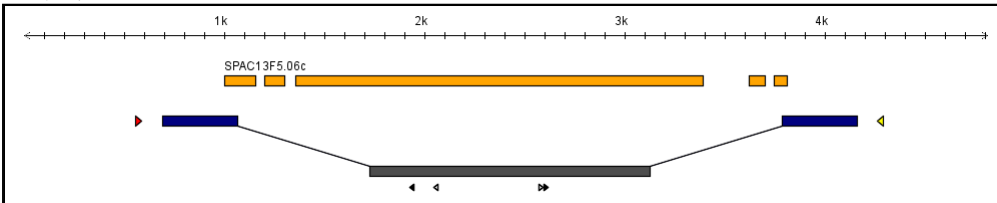

SPAC13F5.07c

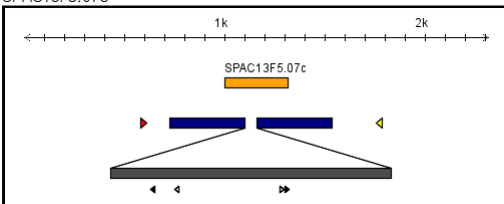

SPAC13G6.01c

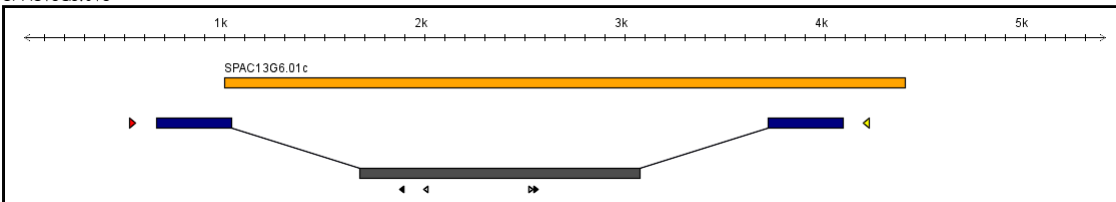

SPAC13G6.02c

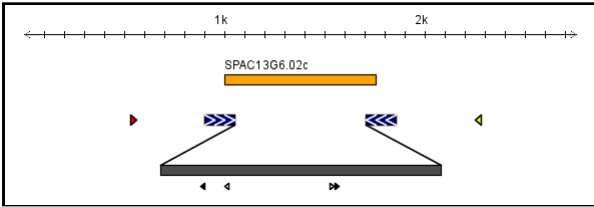

SPAC13G6.03

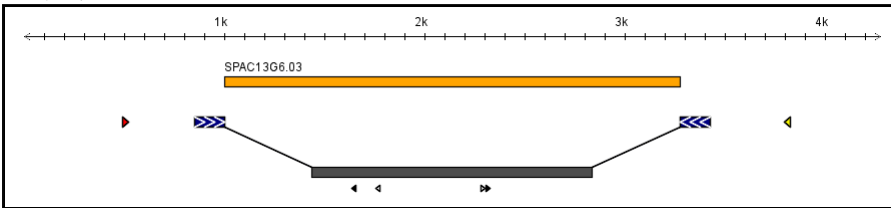

SPAC13G6.04

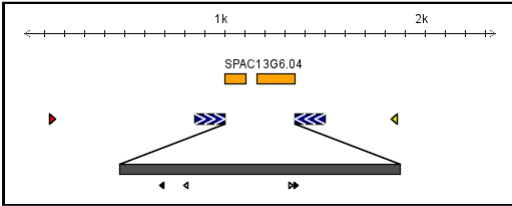

SPAC13G6.05c

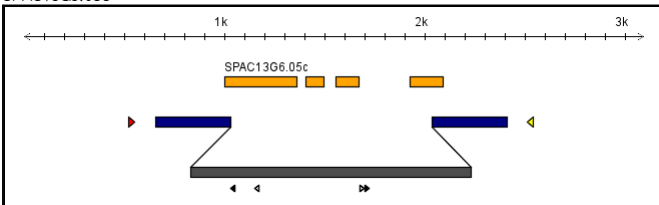

SPAC13G6.07c

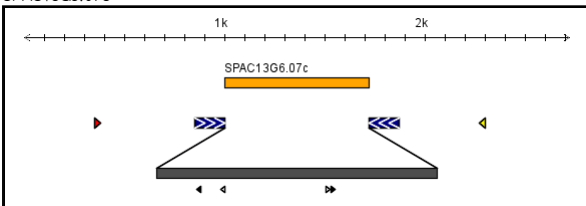

SPAC13G6.08

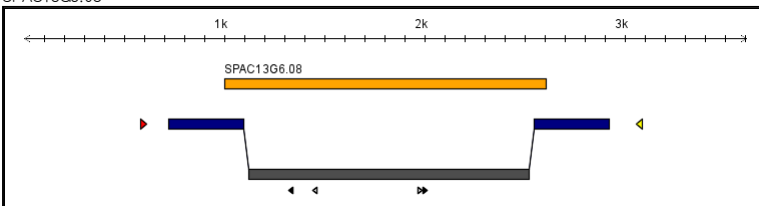

SPAC13G6.09

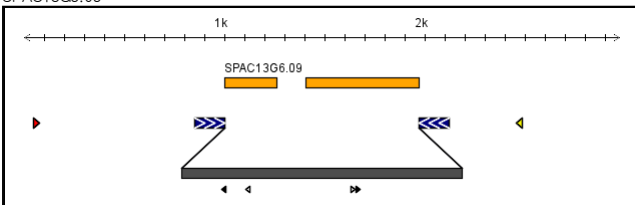

SPAC13G6.10c

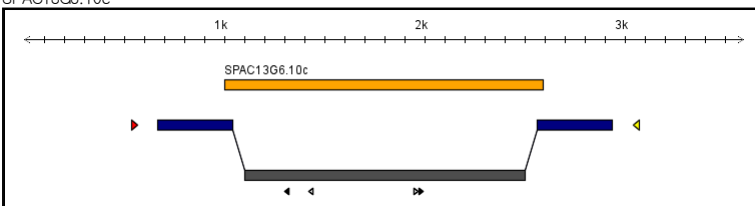

SPAC13G6.11c

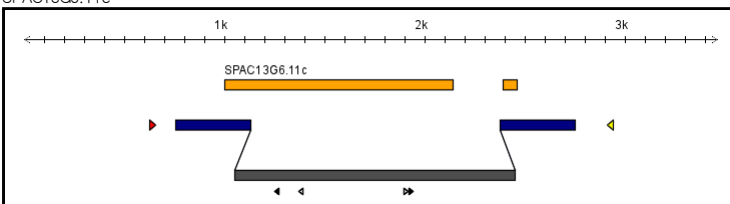



SPAC13G6.12c

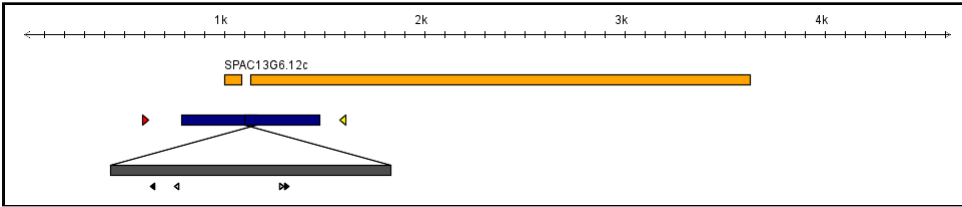

SPAC13G6.13

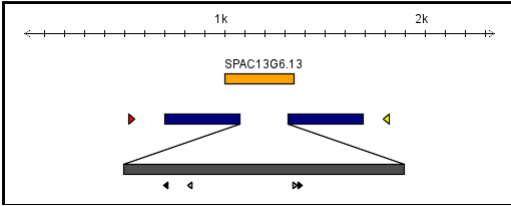

SPAC13G6.14

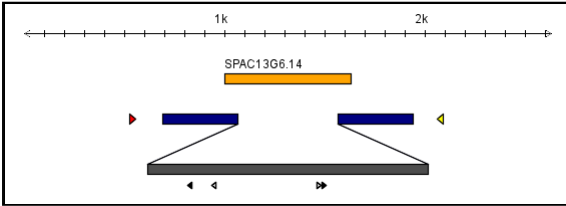

SPAC13G6.15c

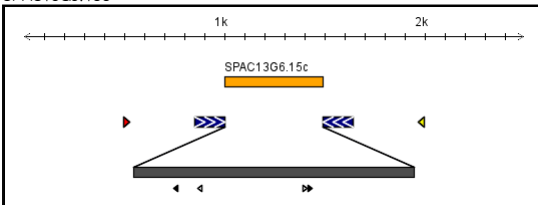

SPAC13G7.01c

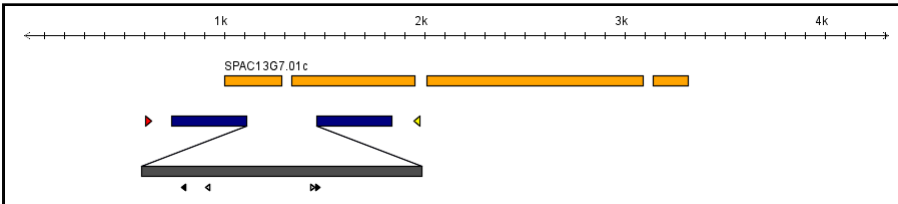

SPAC13G7.02c

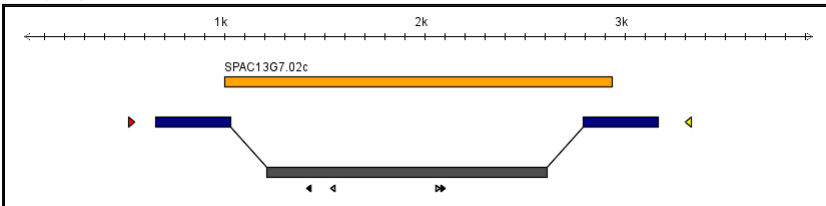

SPAC13G7.03

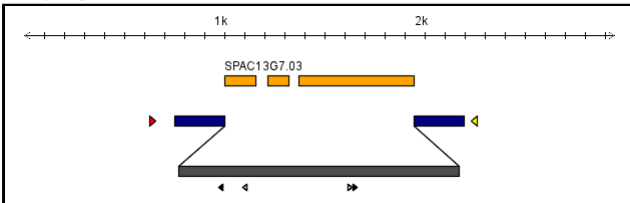

SPAC13G7.04c

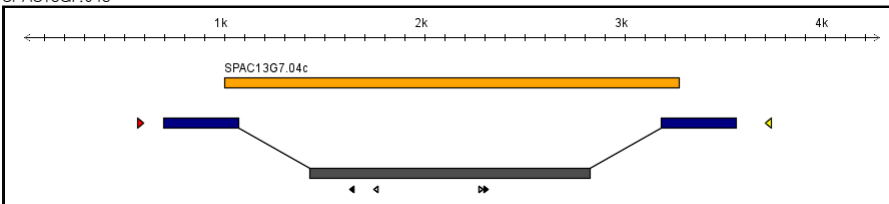

SPAC13G7.05

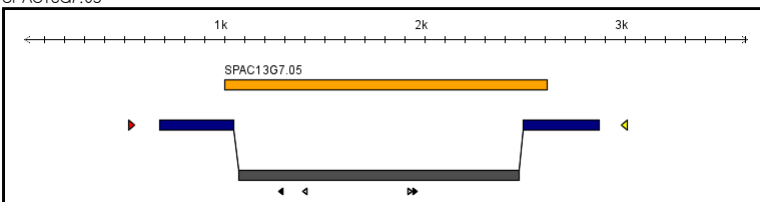

SPAC13G7.06

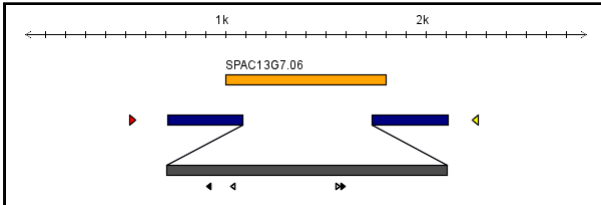

SPAC13G7.07

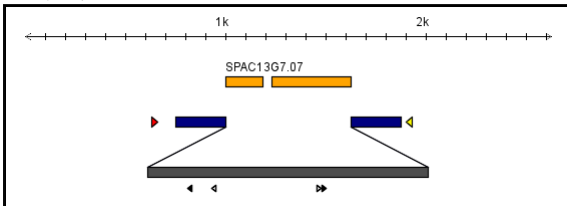

SPAC13G7.08c

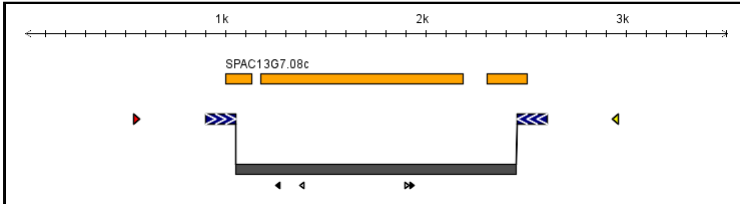

SPAC13G7.09c

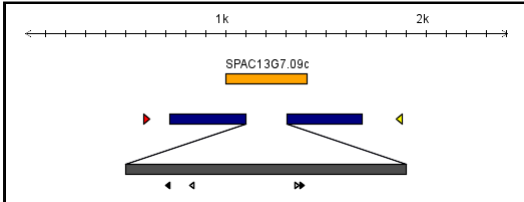

SPAC13G7.10

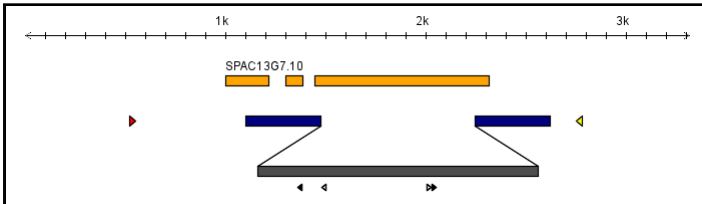

SPAC13G7.11

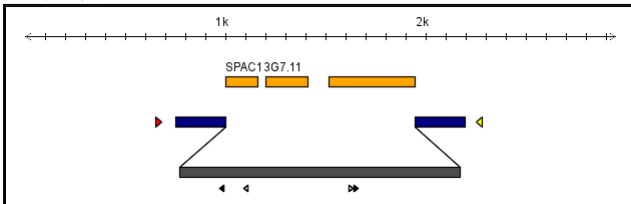

SPAC13G7.12c

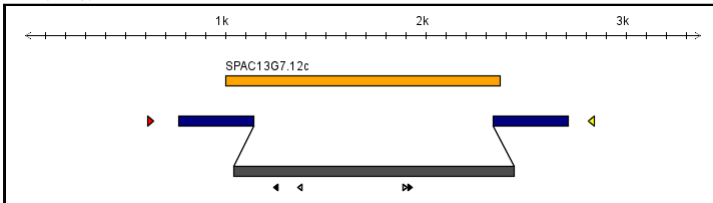

SPAC13G7.13c

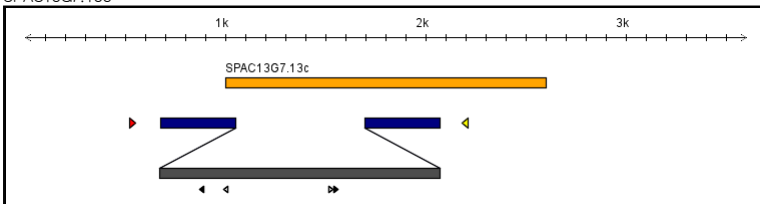

SPAC14C4.01c

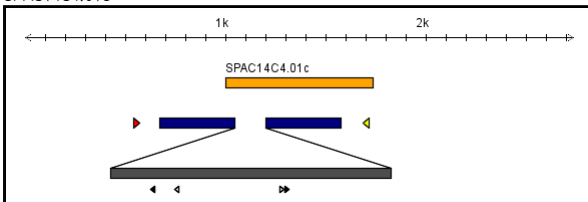

SPAC14C4.02c

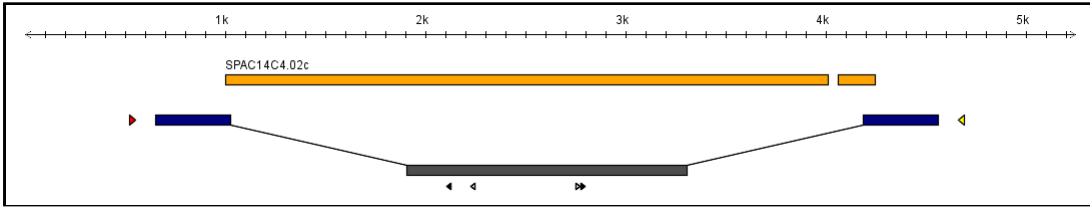

SPAC14C4.03

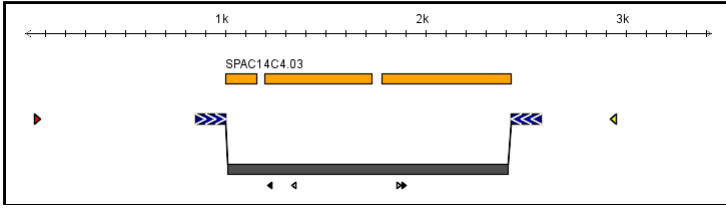

SPAC14C4.04

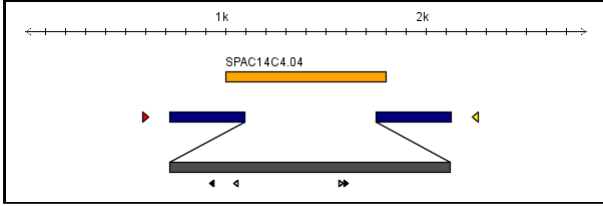

SPAC14C4.06c

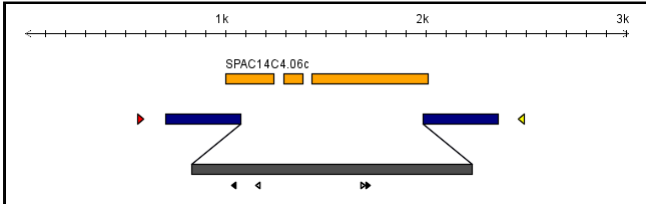

SPAC14C4.07

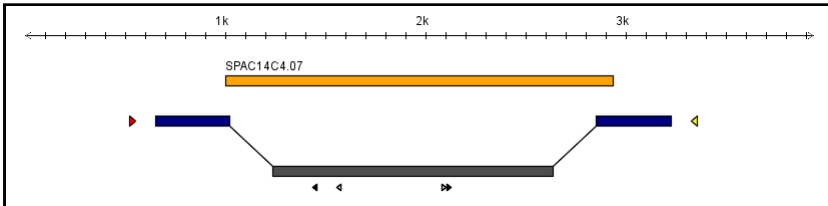

SPAC14C4.08

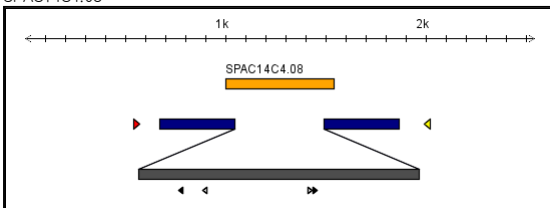

SPAC14C4.09

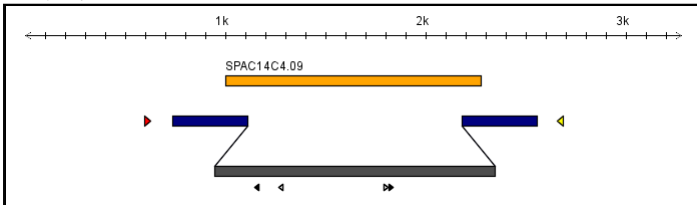

SPAC14C4.10c

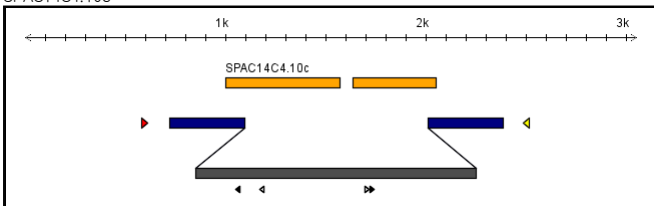

SPAC14C4.11

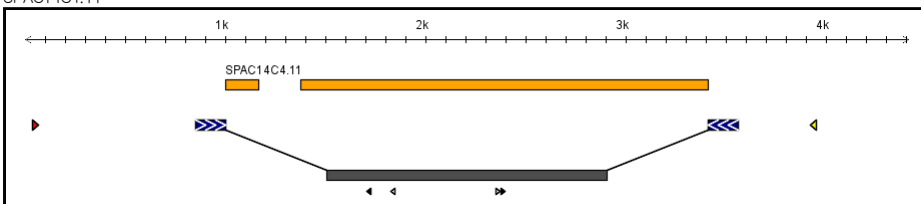



SPAC15A10.06

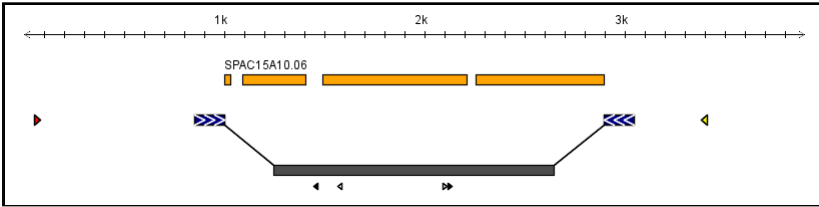

SPAC15A10.07

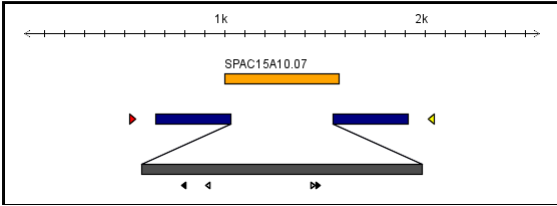

SPAC15A10.08

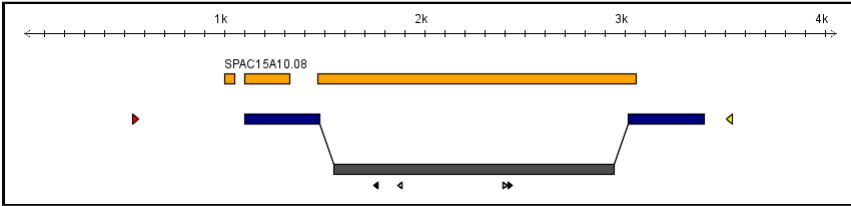

SPAC15A10.09c

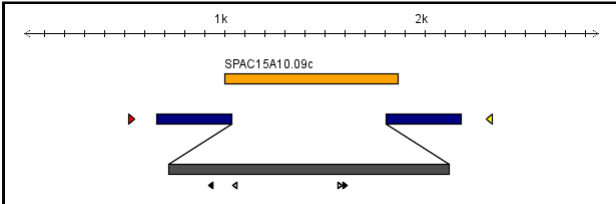

SPAC15A10.10

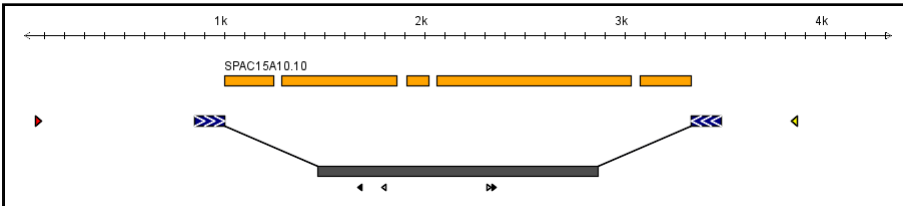

SPAC15A10.12c

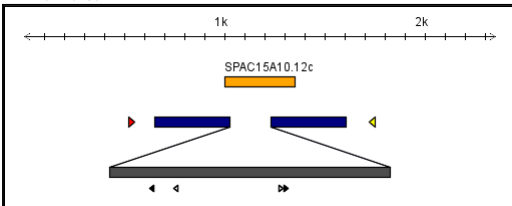

SPAC15A10.13

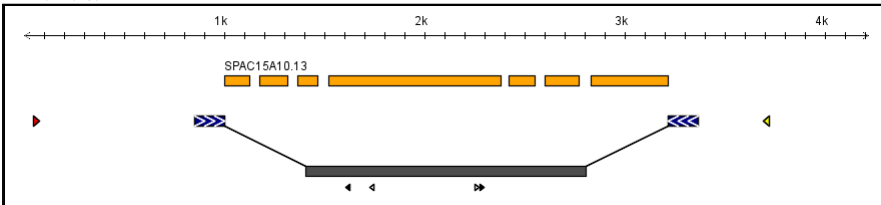

SPAC15A10.15

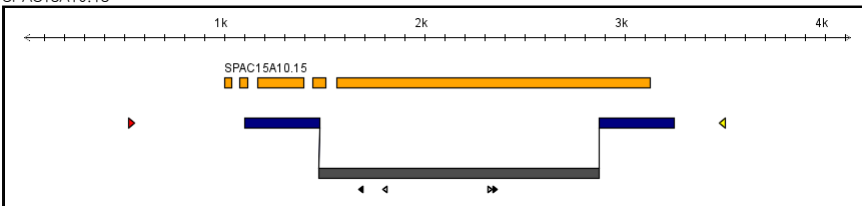

SPAC15A10.16

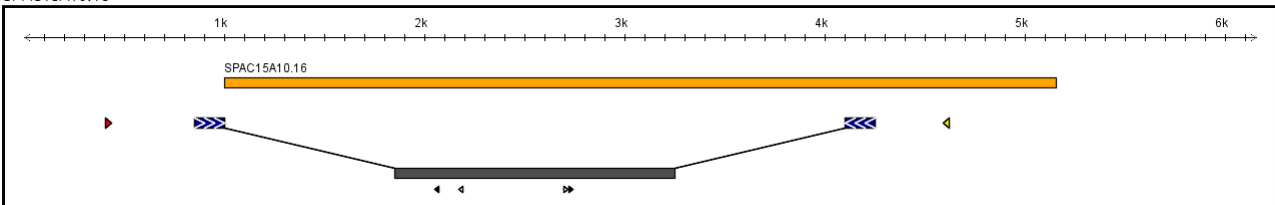

SPAC15E1.02c

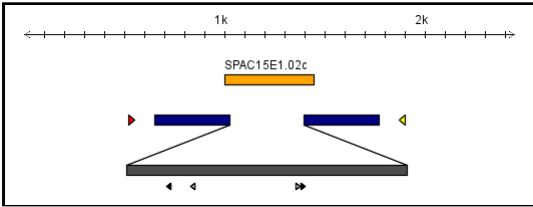

SPAC15E1.04

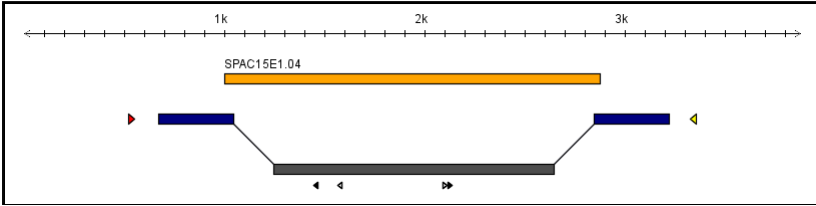

SPAC15E1.05c

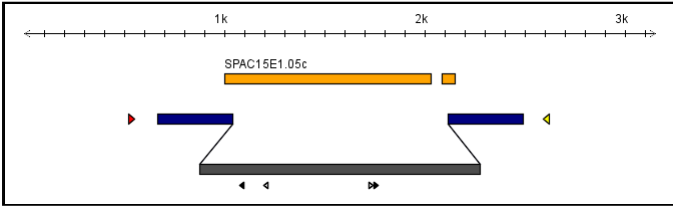

SPAC15E1.06

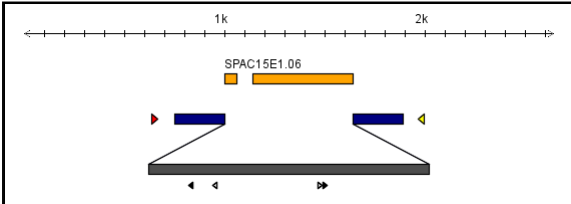

SPAC15E1.07c

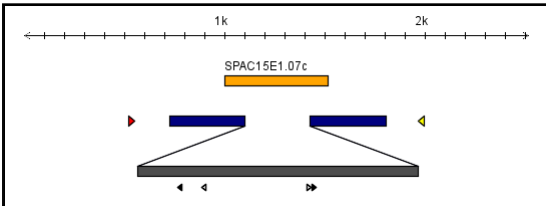

SPAC15E1.08

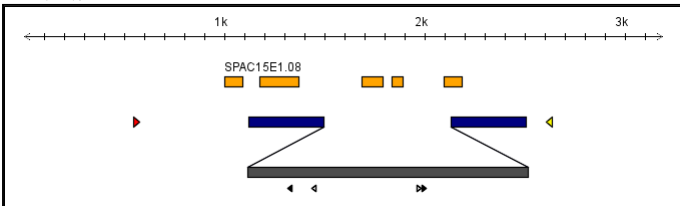

SPAC15E1.09

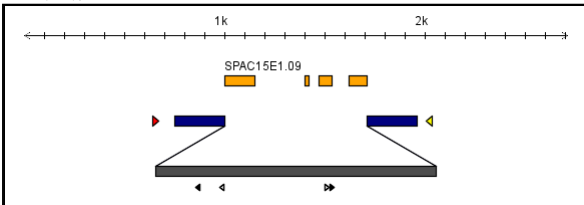

SPAC15E1.10

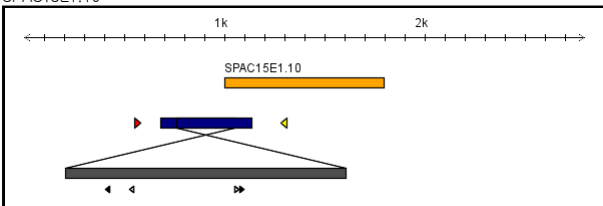

SPAC15F9.01c

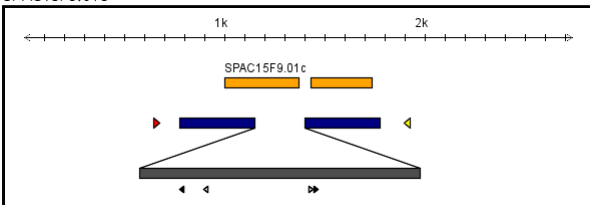



SPAC15F9.02

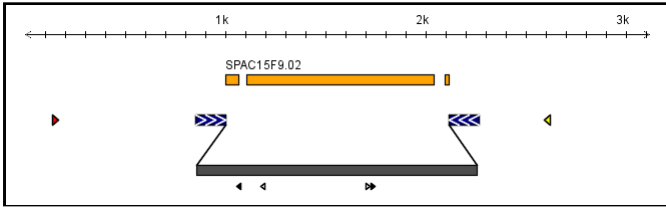

SPAC15F9.03c

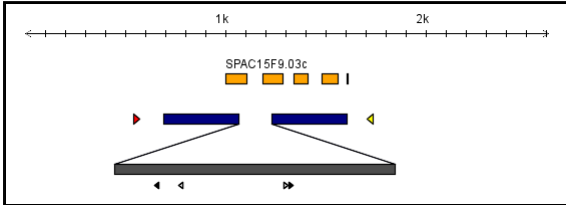

SPAC16.01

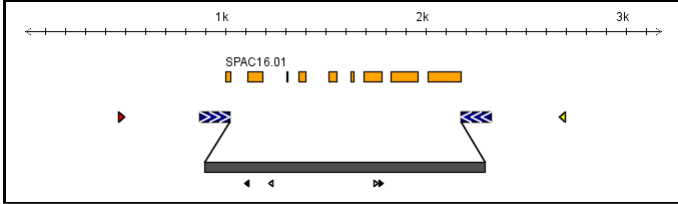

SPAC16.02c

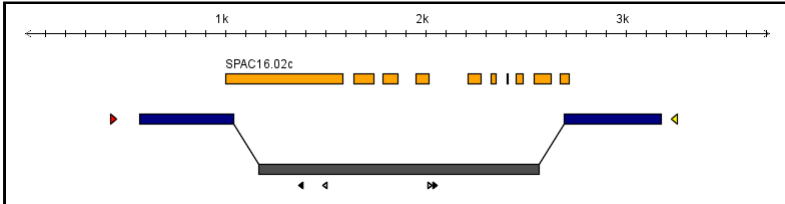

SPAC16.03c

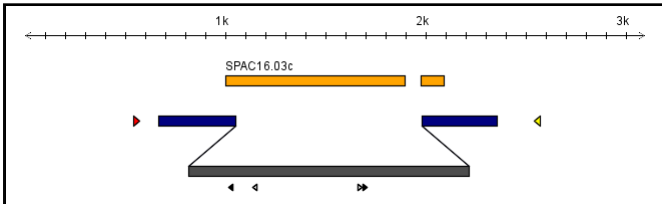

SPAC16.04

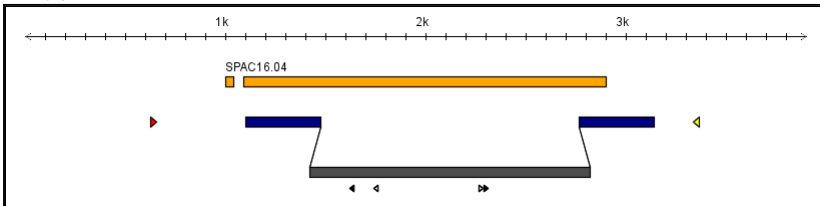

SPAC16.05c

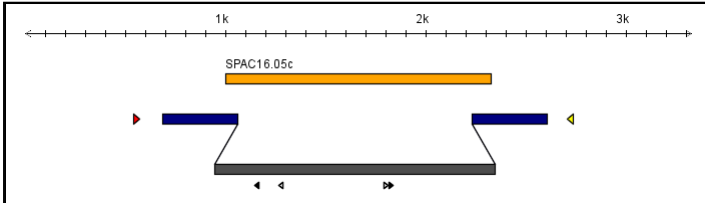

SPAC16A10.01

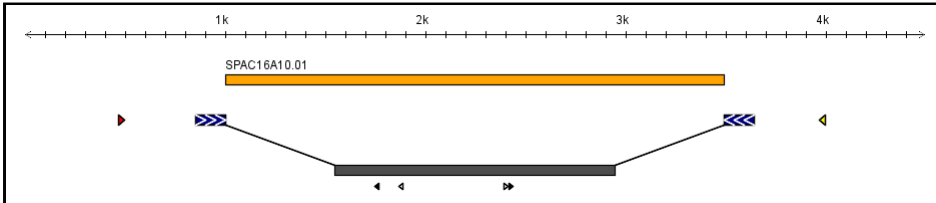

SPAC16A10.02

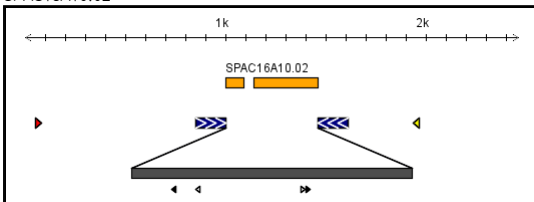

SPAC16A10.03c

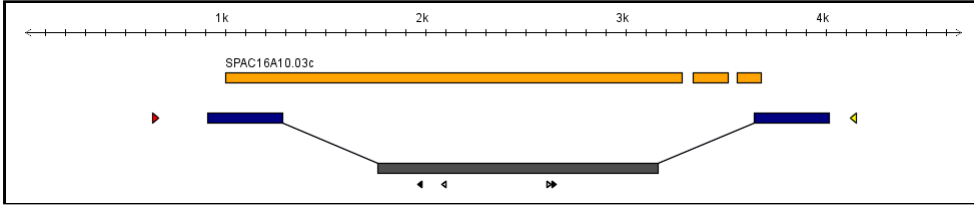

SPAC16A10.04

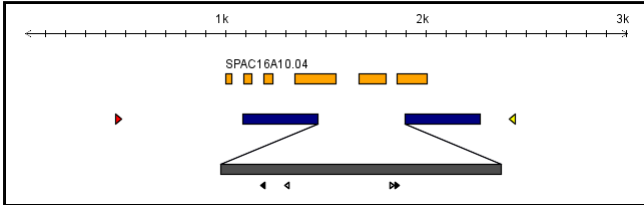

SPAC16A10.05c

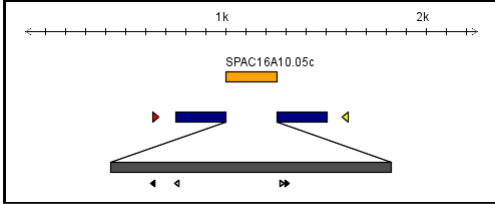

SPAC16A10.06c

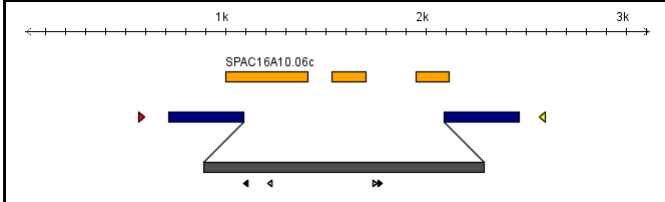

SPAC16A10.07c

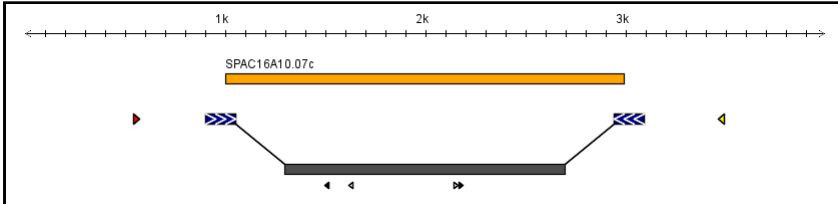

SPAC16C9.01c

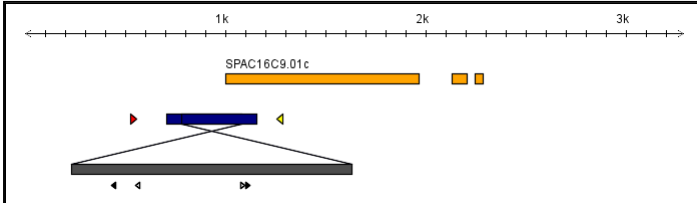

SPAC16C9.02c

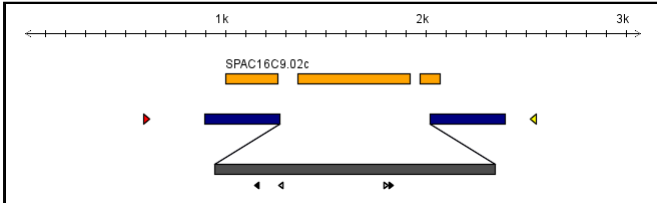

SPAC16C9.03

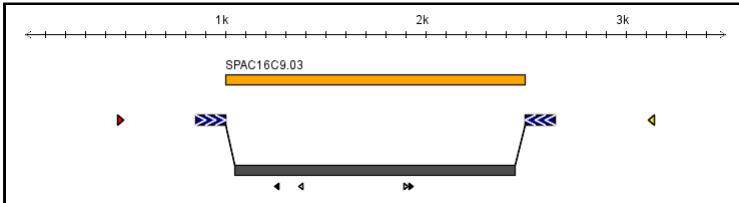

SPAC16C9.04c

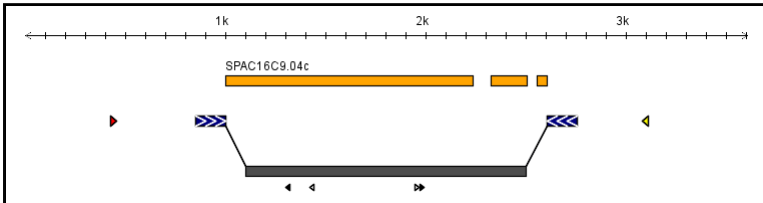

SPAC16C9.05

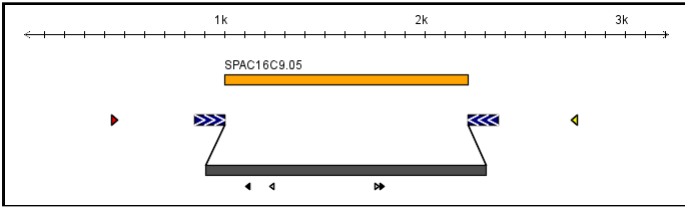

SPAC16C9.07

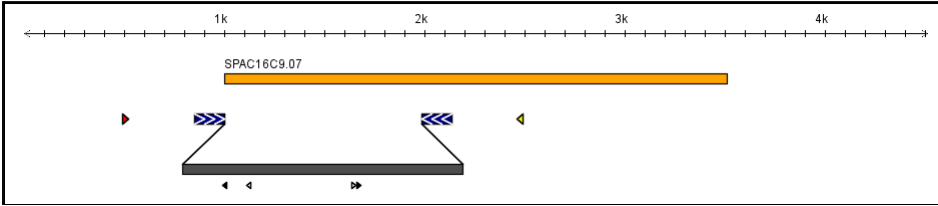

SPAC16E8.01

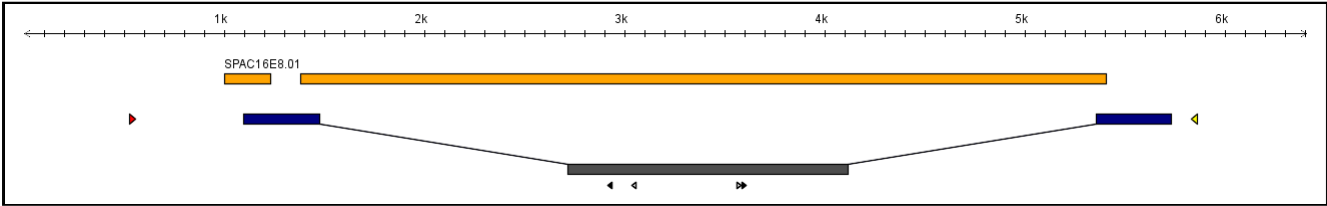

SPAC16E8.02

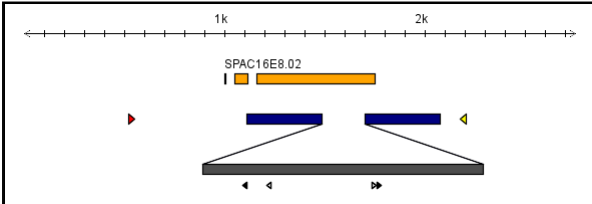

SPAC16E8.03

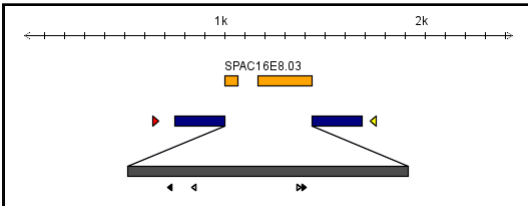

SPAC16E8.04c

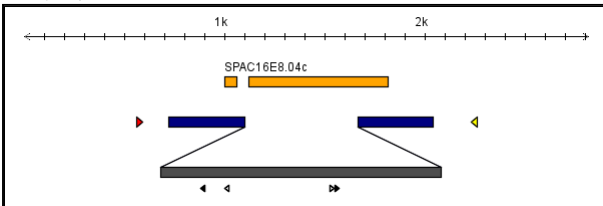

SPAC16E8.05c

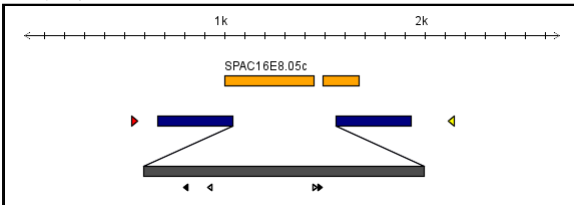

SPAC16E8.06c

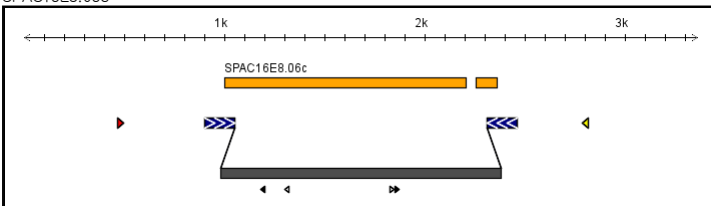

SPAC16E8.07c

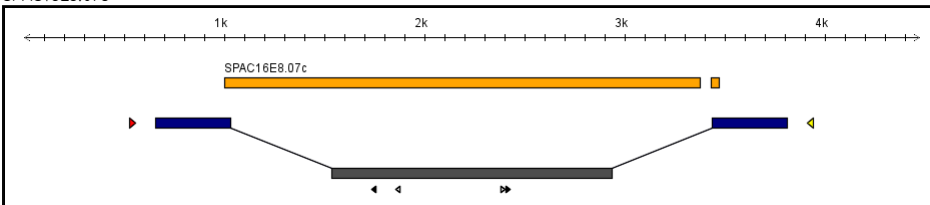

SPAC16E8.08

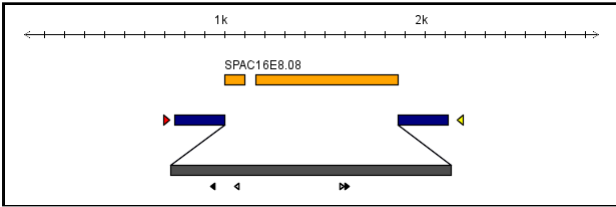

SPAC16E8.09

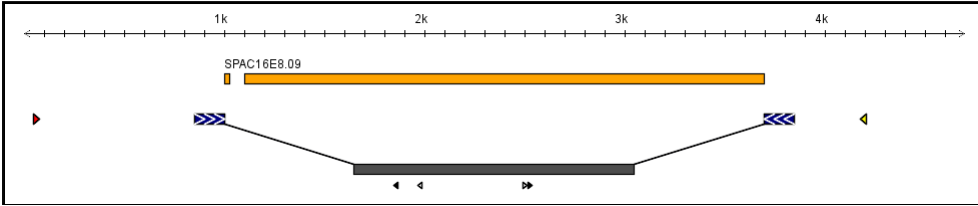

SPAC16E8.10c

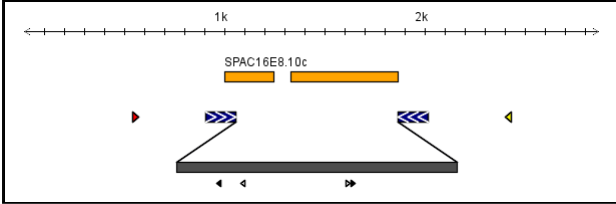

SPAC16E8.11c

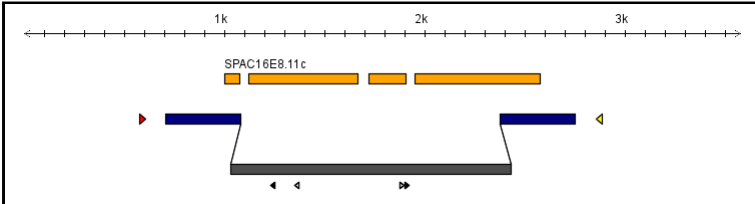

SPAC16E8.12c

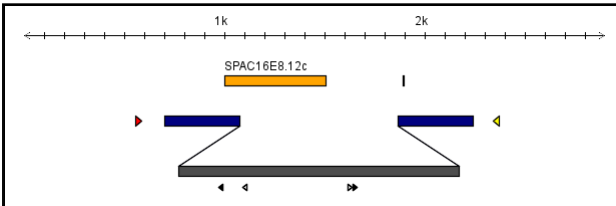

SPAC16E8.13

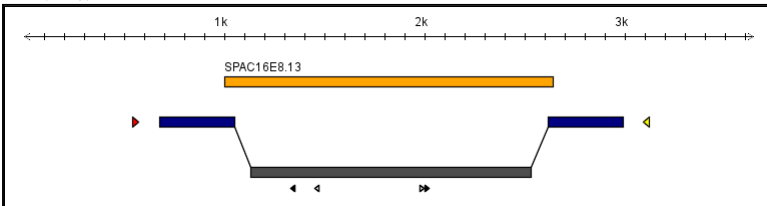

SPAC16E8.14c

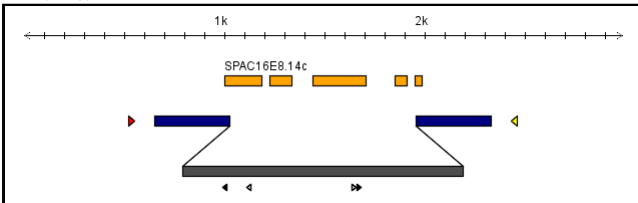

SPAC16E8.15

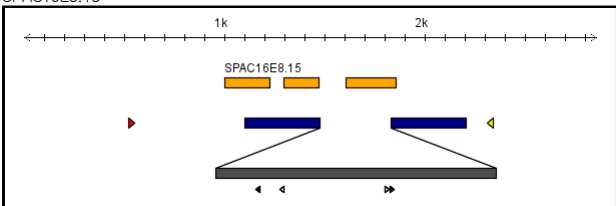

SPAC16E8.16

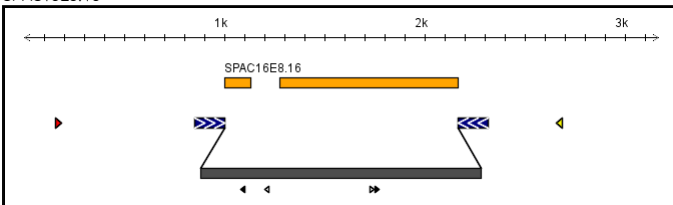

SPAC16E8.17c

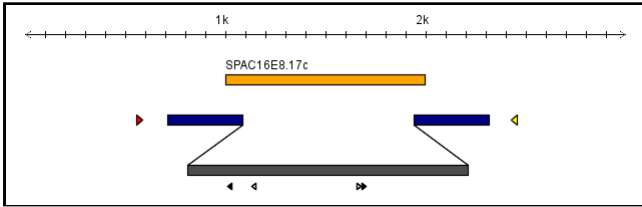

SPAC16E8.18

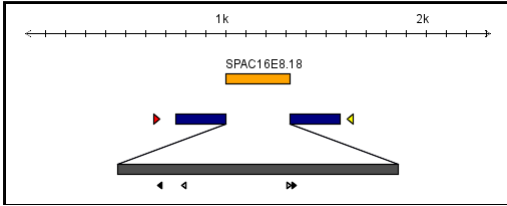

SPAC17A2.01

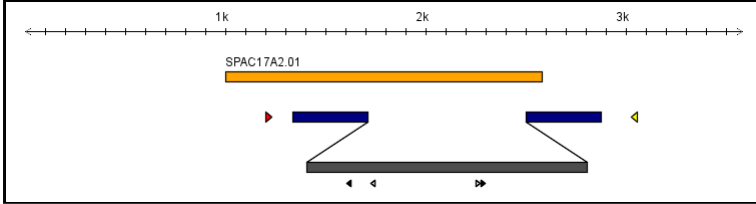

SPAC17A2.02c

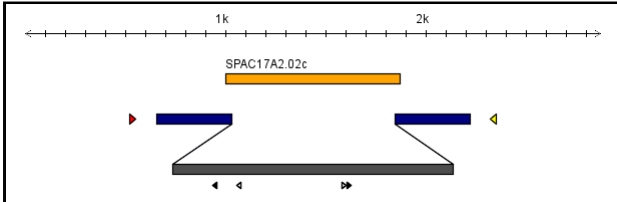

SPAC17A2.03c

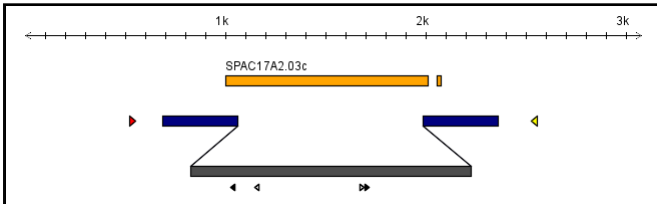

SPAC17A2.04c

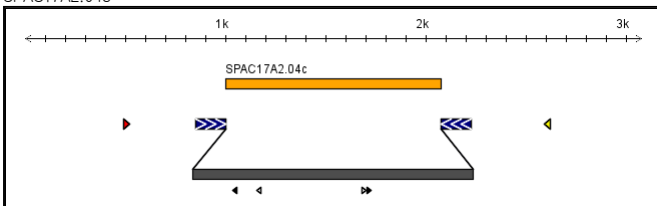

SPAC17A2.05

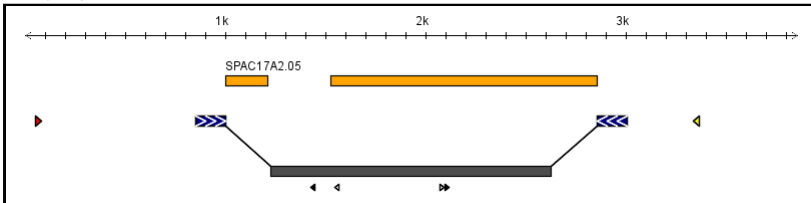

SPAC17A2.07c

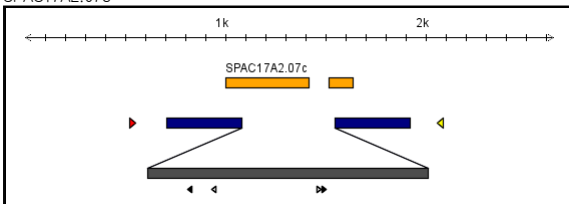

SPAC17A2.08c

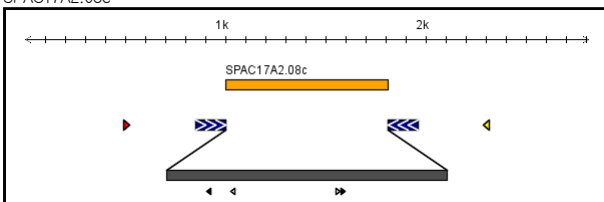

SPAC17A2.09c

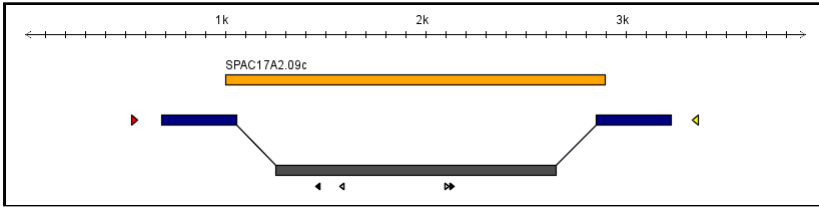

SPAC17A2.10c

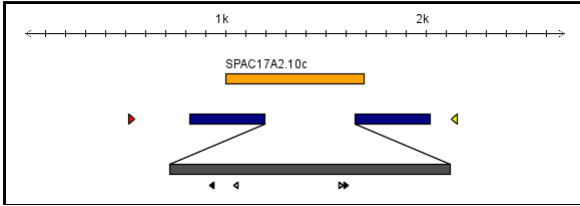

SPAC17A2.11

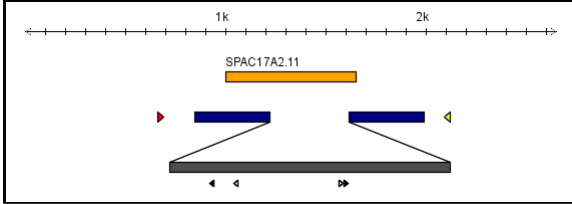

SPAC17A2.13c

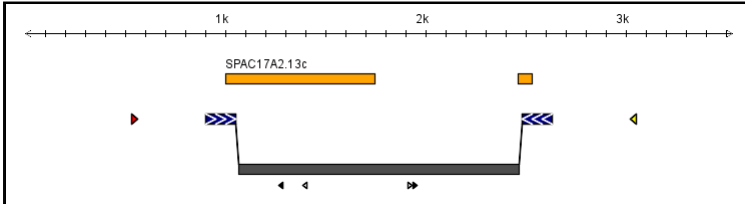

SPAC17A2.14

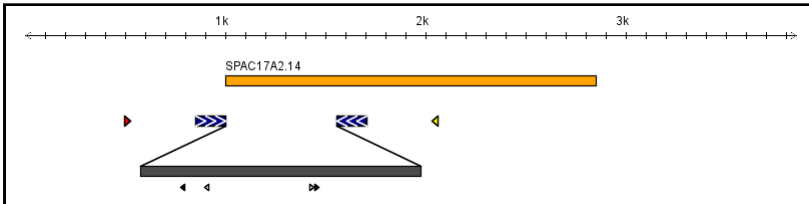

SPAC17A5.01

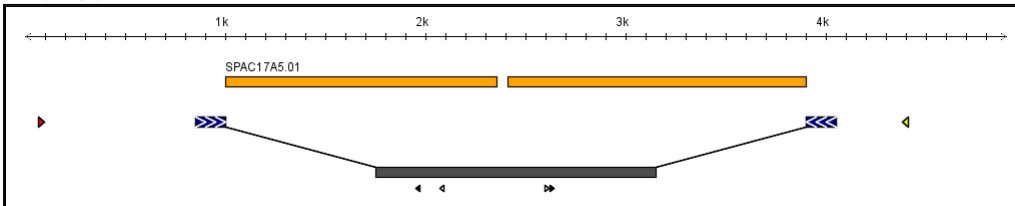

SPAC17A5.02c

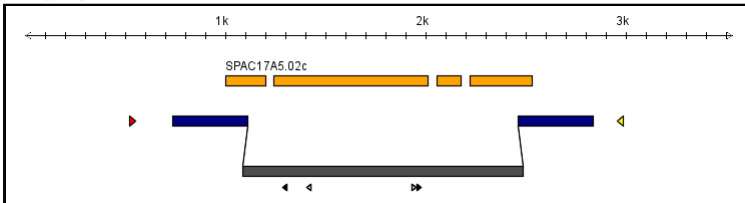

SPAC17A5.03

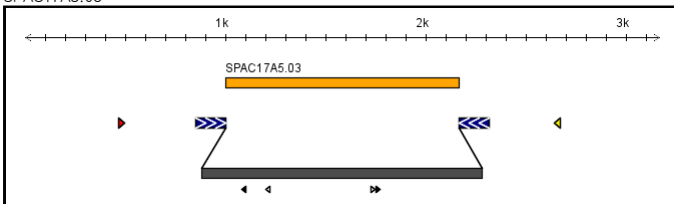

SPAC17A5.04c

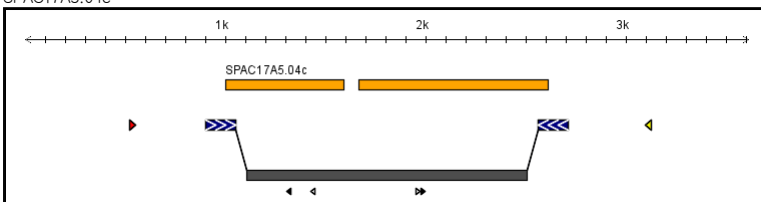



SPAC17A5.05c

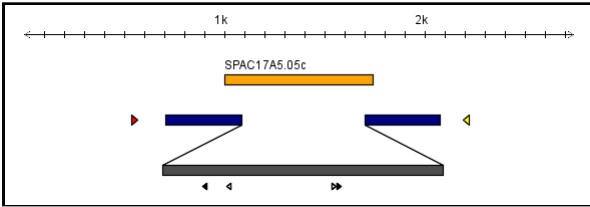

SPAC17A5.07c

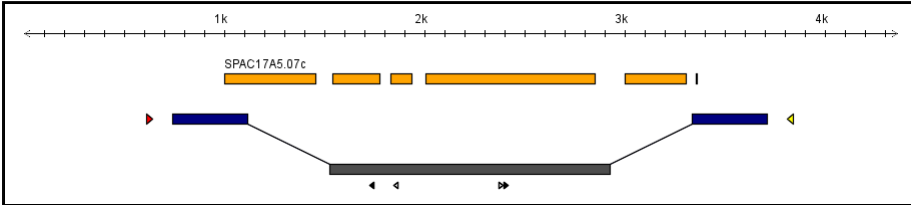

SPAC17A5.08

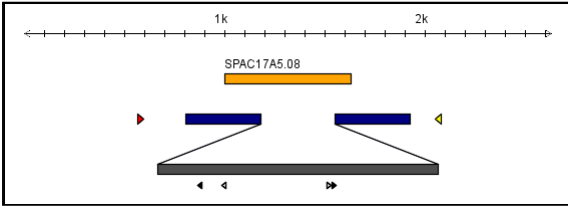

SPAC17A5.09c

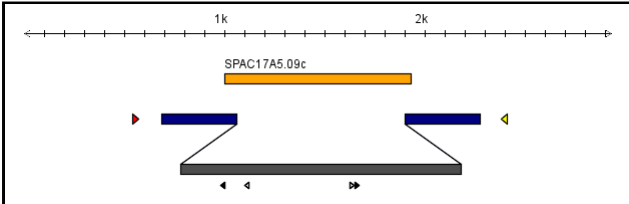

SPAC17A5.10

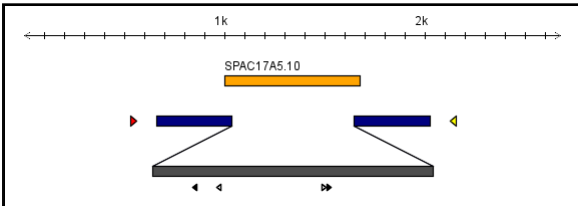

SPAC17A5.11

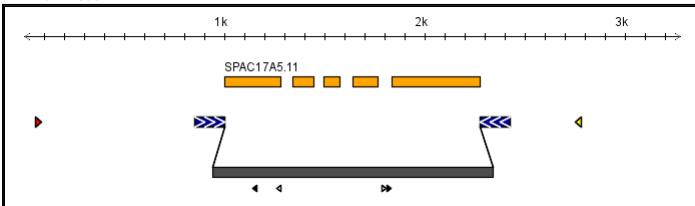

SPAC17A5.12

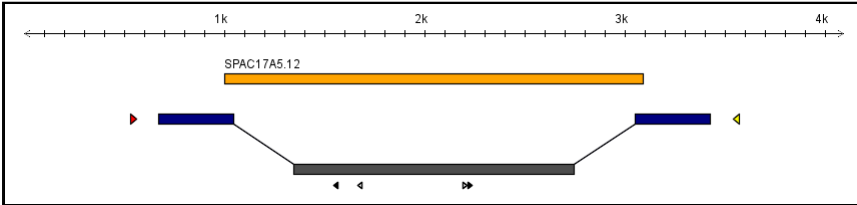

SPAC17A5.13

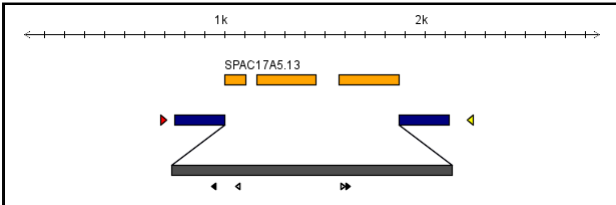

SPAC17A5.15c

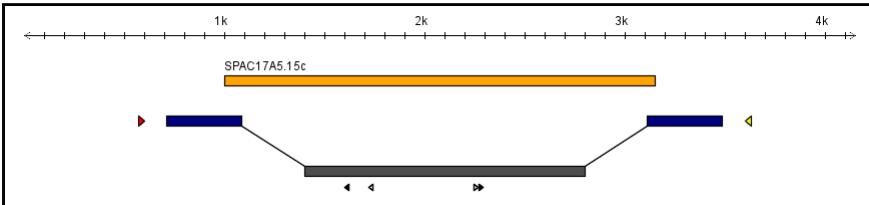

SPAC17A5.18c

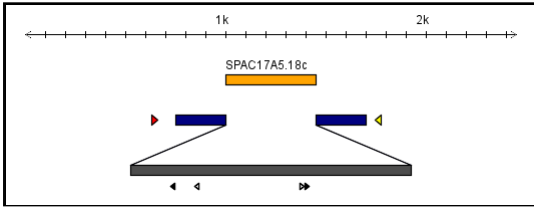

SPAC17C9.01c

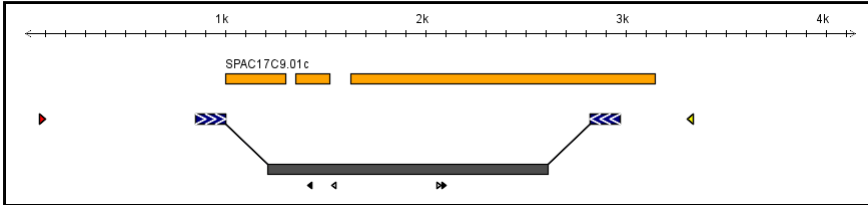

SPAC17C9.02c

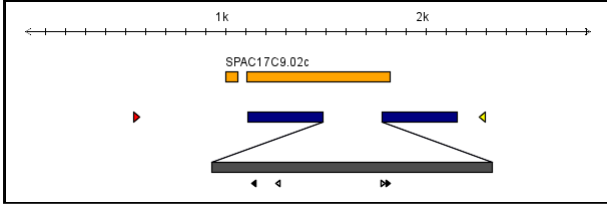

SPAC17C9.05c

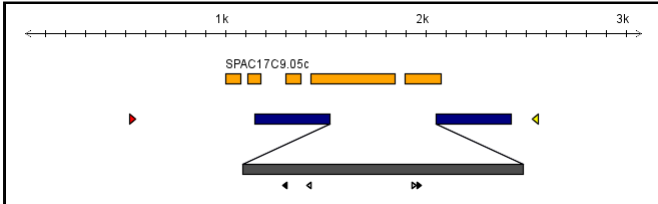

SPAC17C9.06

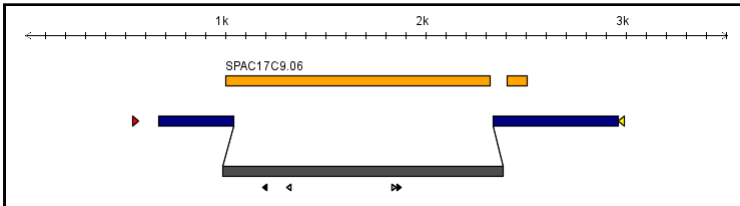

SPAC17C9.07

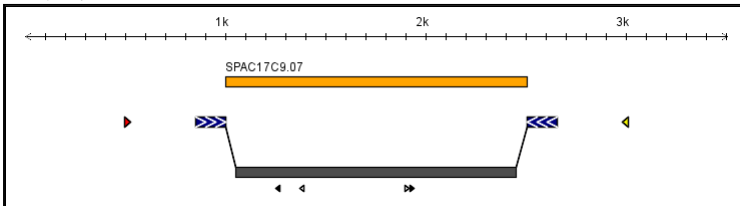

SPAC17C9.08

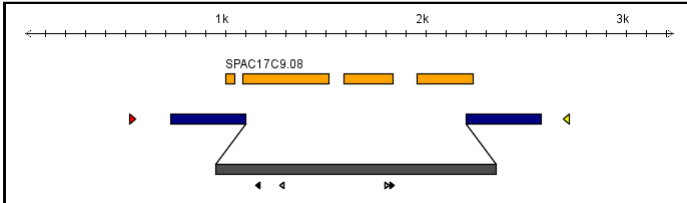

SPAC17C9.09c

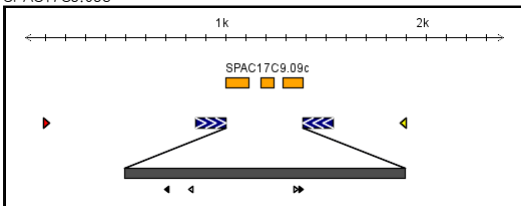

SPAC17C9.10

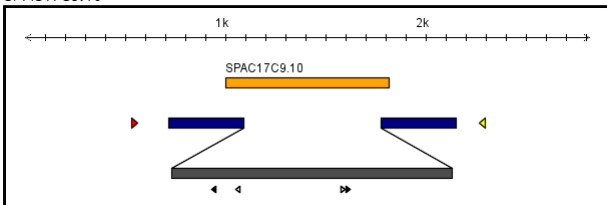

SPAC17C9.11c

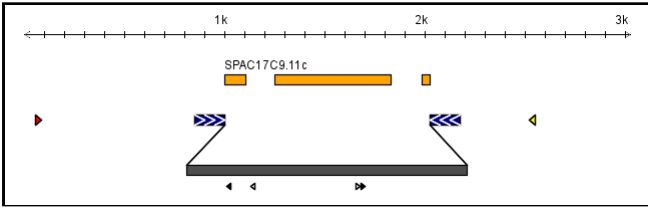

SPAC17C9.12

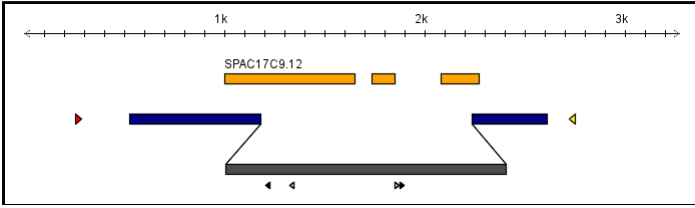

SPAC17C9.13c

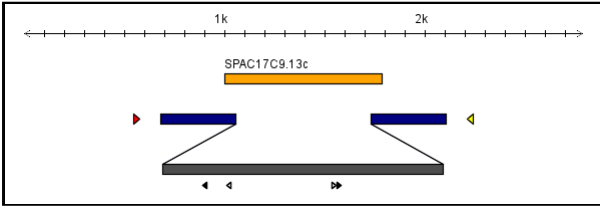

SPAC17C9.14

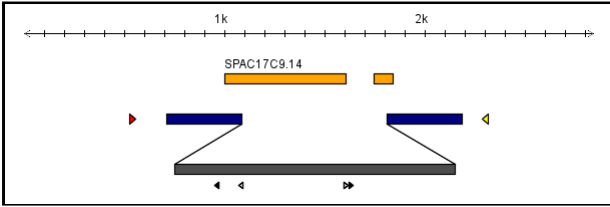

SPAC17C9.15c

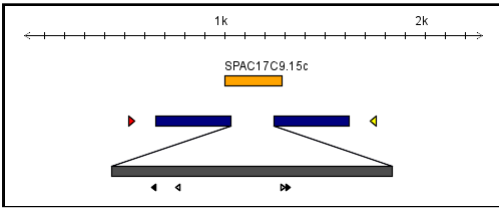

SPAC17C9.16c

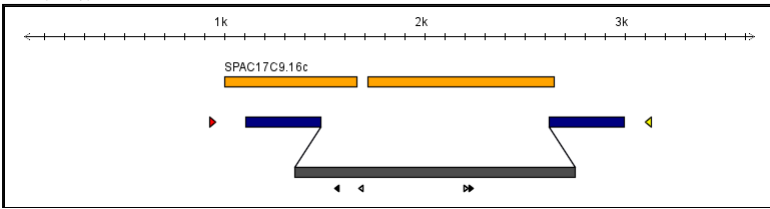

SPAC17D4.01

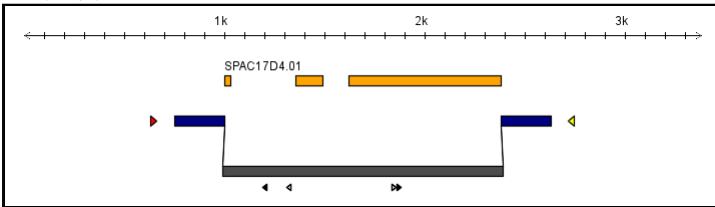

SPAC17D4.02

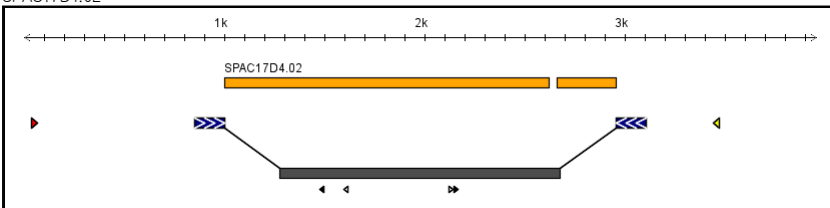

SPAC17D4.03c

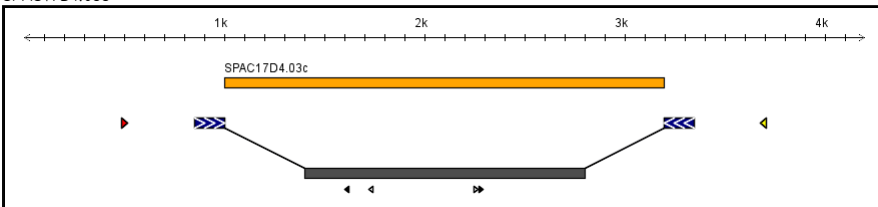

SPAC17D4.04

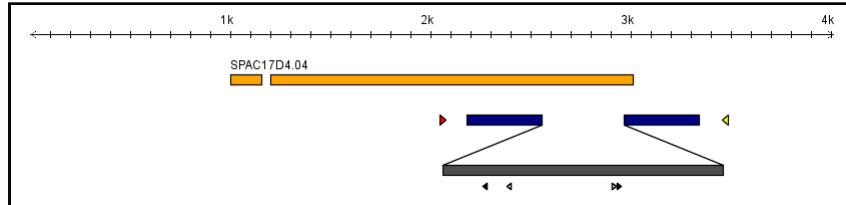

SPAC17G6.02c

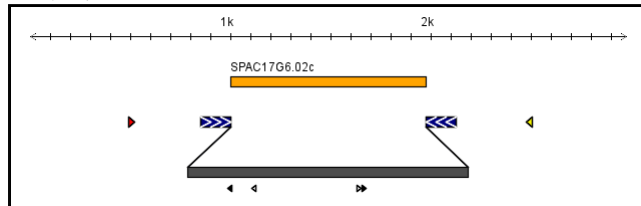

SPAC17G6.03

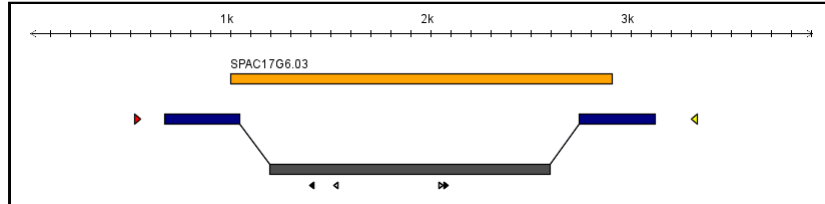

SPAC17G6.04c

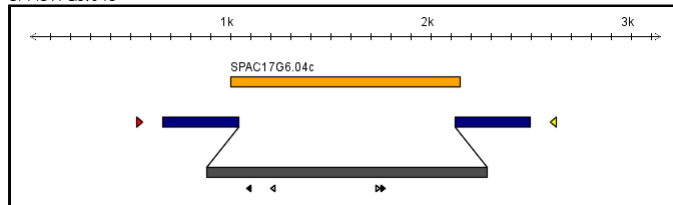

SPAC17G6.05c

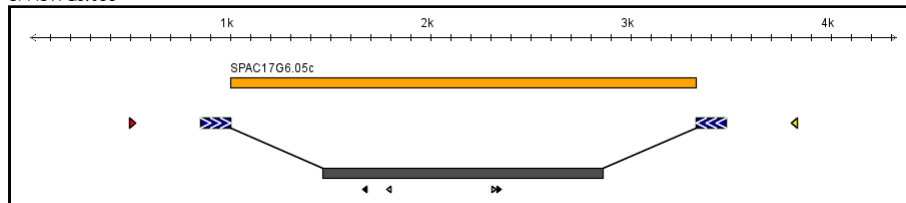

SPAC17G6.06

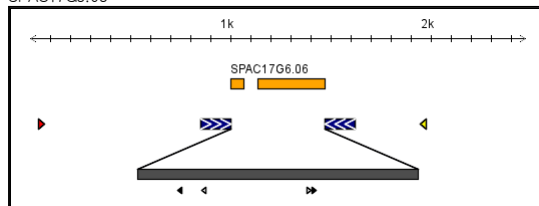

SPAC17G6.07c

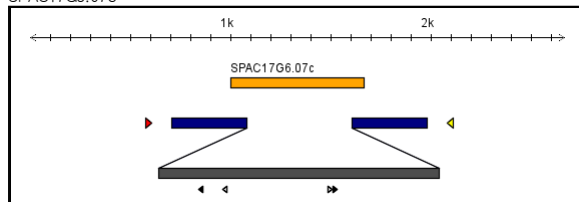

SPAC17G6.08

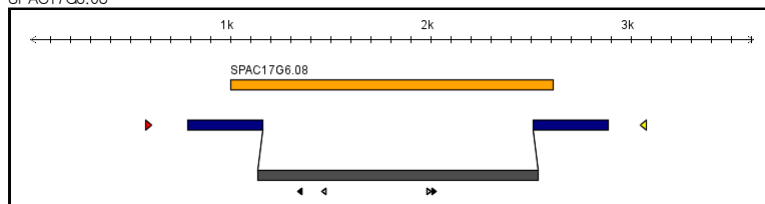

SPAC17G6.09

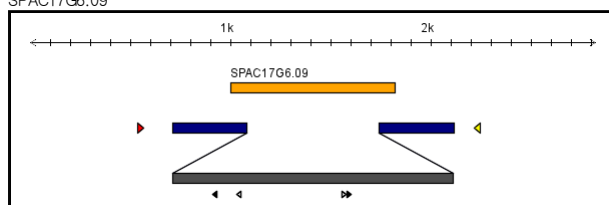

SPAC17G6.10

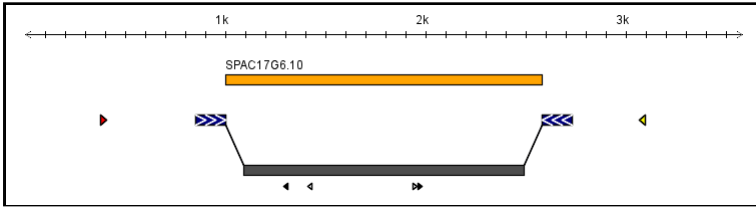

SPAC17G6.11c

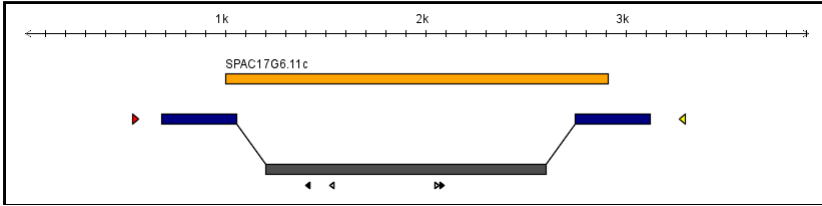

SPAC17G6.12

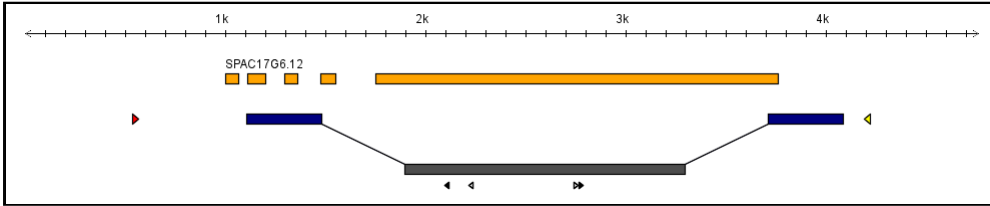

SPAC17G6.13

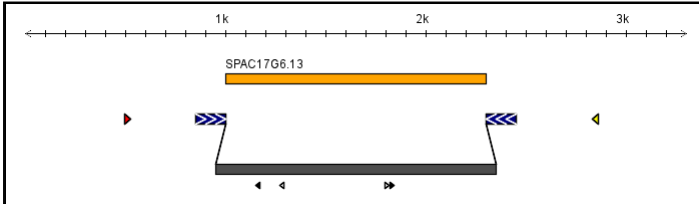

SPAC17G6.14c

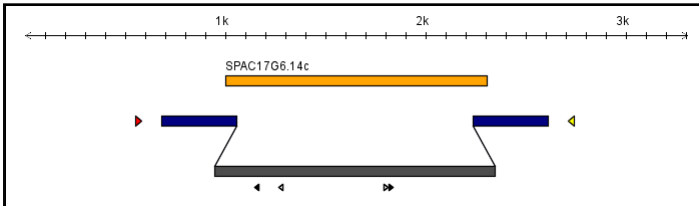

SPAC17G6.15c

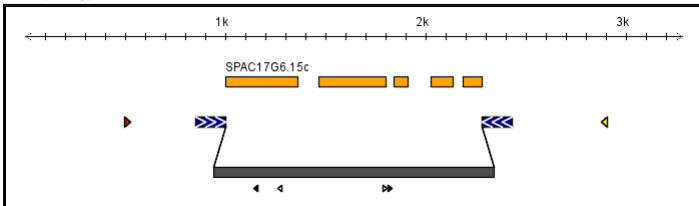

SPAC17G6.17

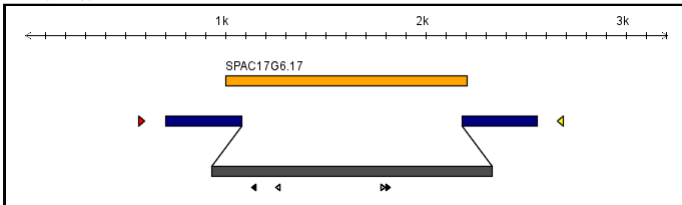

SPAC17G8.01c

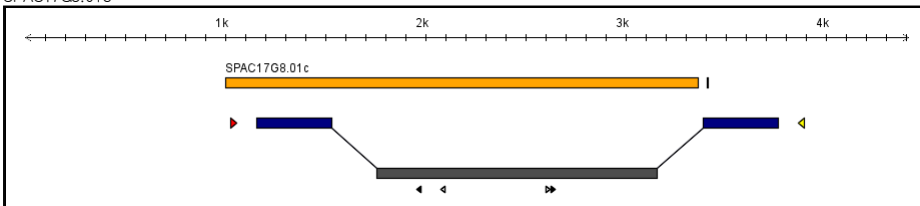

SPAC17G8.02

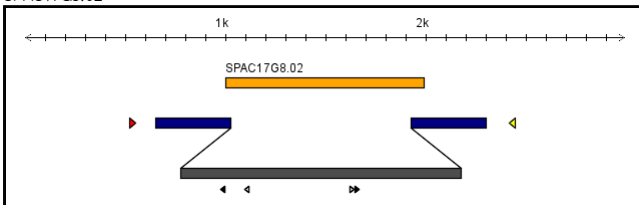

SPAC17G8.03c

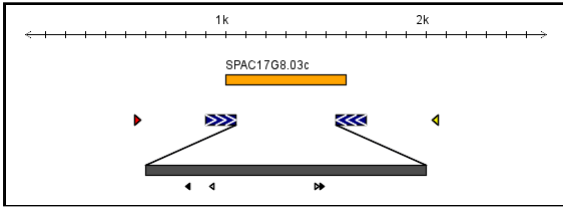

SPAC17G8.04c

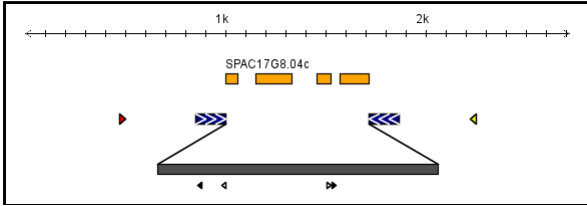

SPAC17G8.05

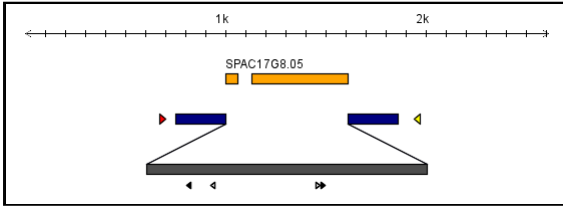

SPAC17G8.06c

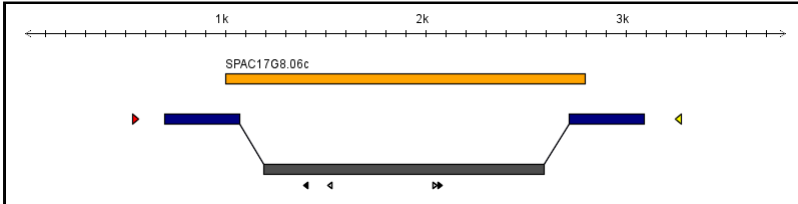

SPAC17G8.07

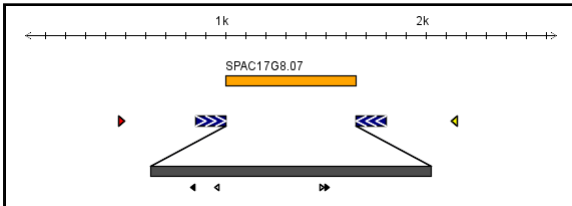

SPAC17G8.08c

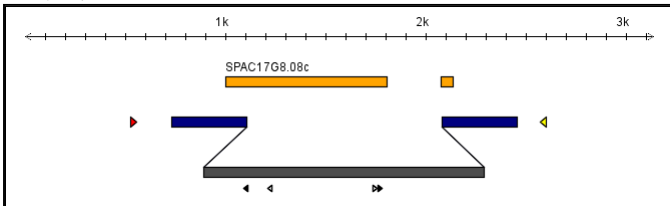

SPAC17G8.09

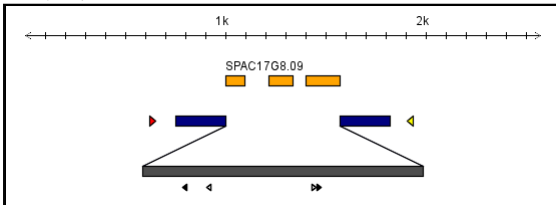

SPAC17G8.10c

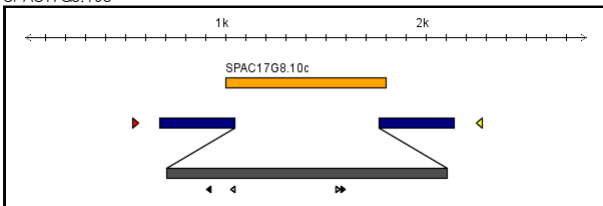

SPAC17G8.11c

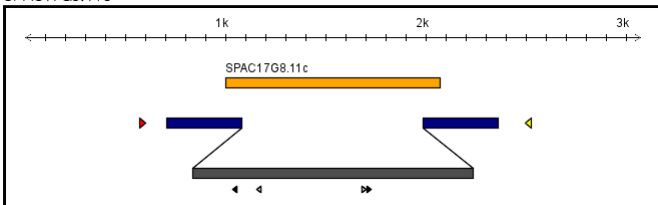

SPAC17G8.12

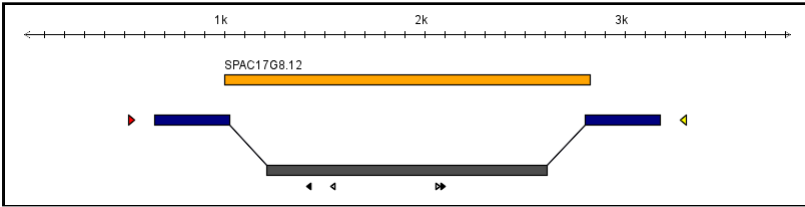

SPAC17G8.13c

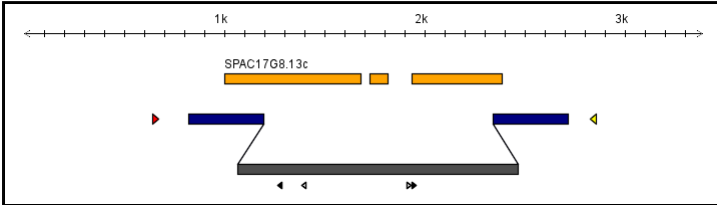

SPAC17H9.03c

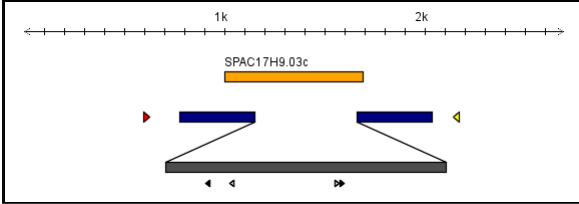

SPAC17H9.04c

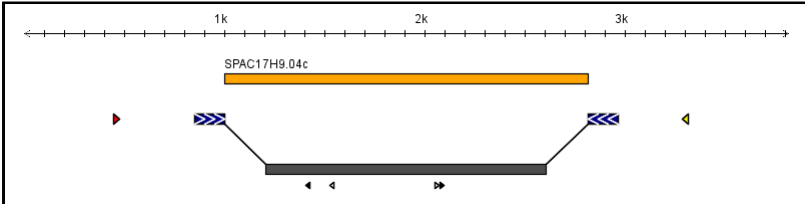

SPAC17H9.05

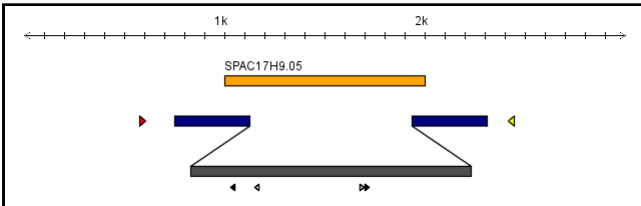

SPAC17H9.06c

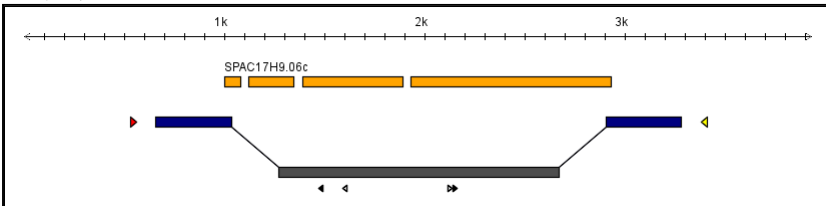

SPAC17H9.07

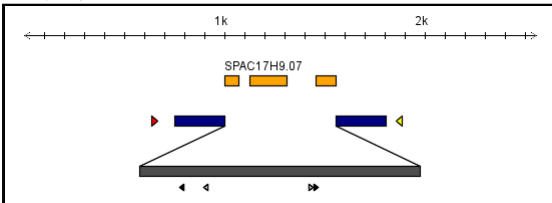

SPAC17H9.08

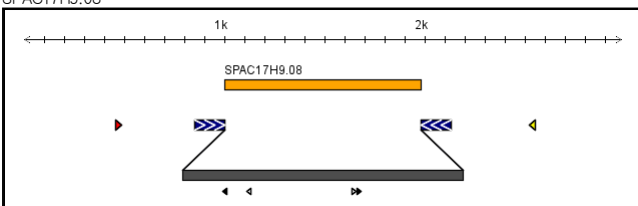

SPAC17H9.09c

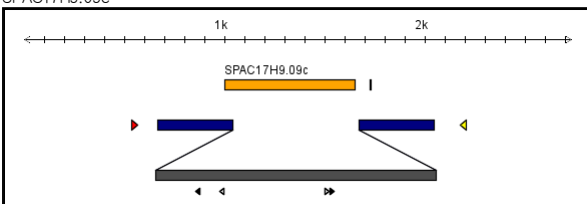

SPAC17H9.11

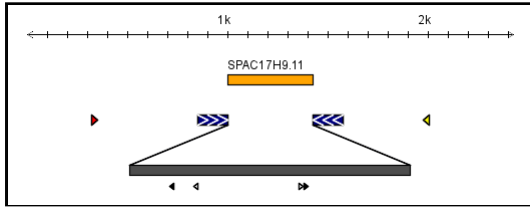

SPAC17H9.12c

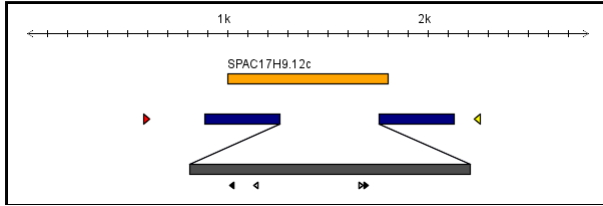

SPAC17H9.13c

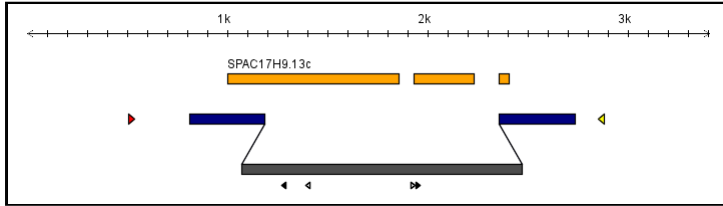

SPAC17H9.14c

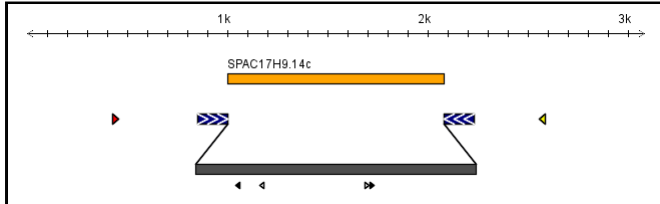

SPAC17H9.16

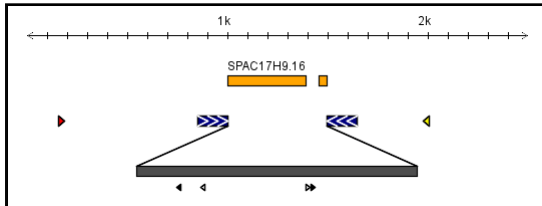

SPAC17H9.17c

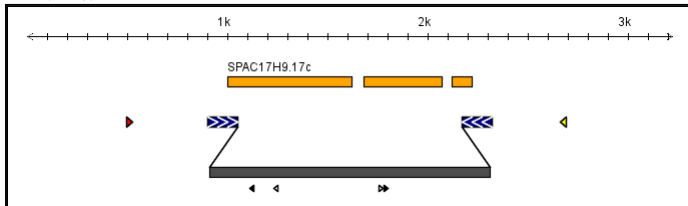

SPAC17H9.19c

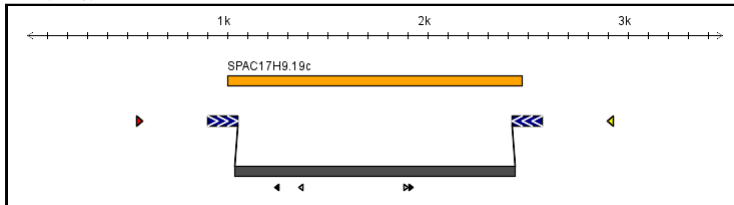

SPAC17H9.20

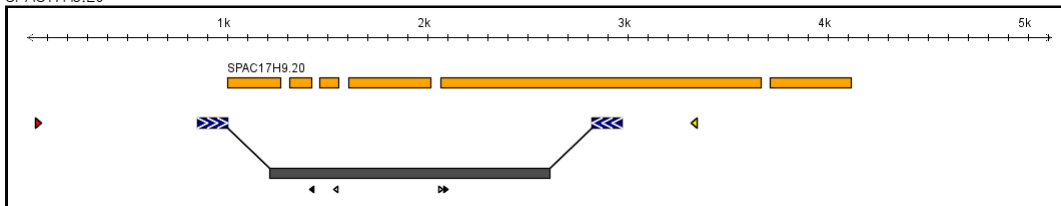

SPAC18B11.02c

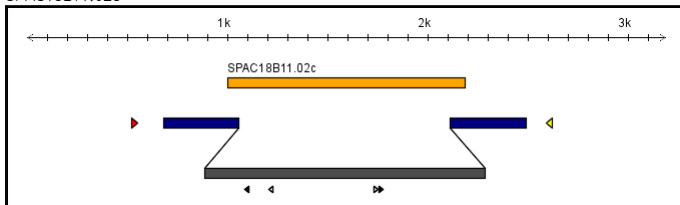



SPAC18B11.03c

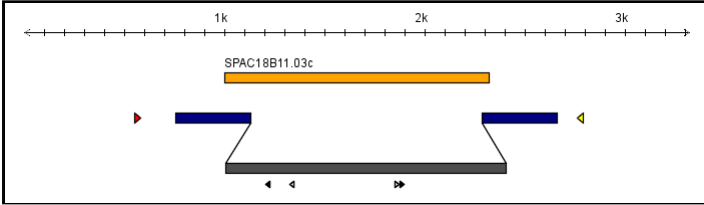

SPAC18B11.04

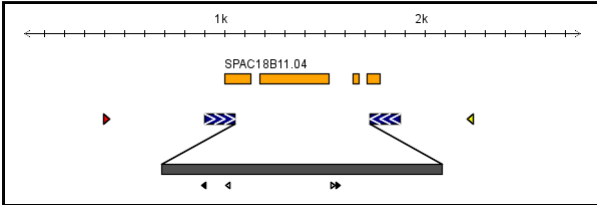

SPAC18B11.05

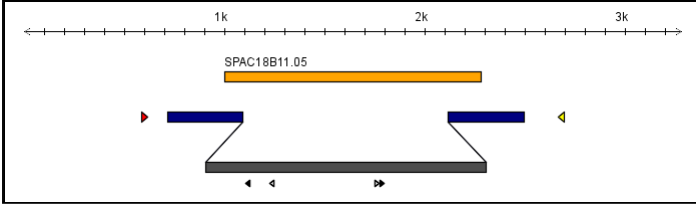

SPAC18B11.06

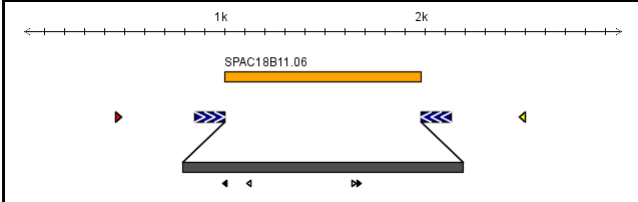

SPAC18B11.07c

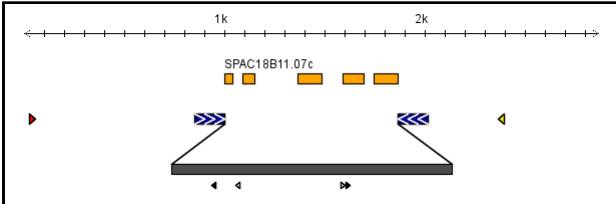

SPAC18B11.08c

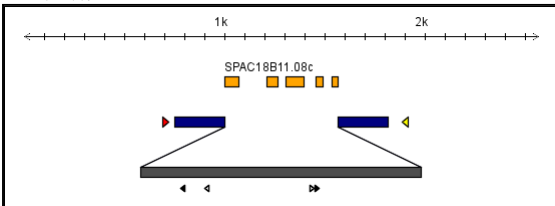

SPAC18B11.09c

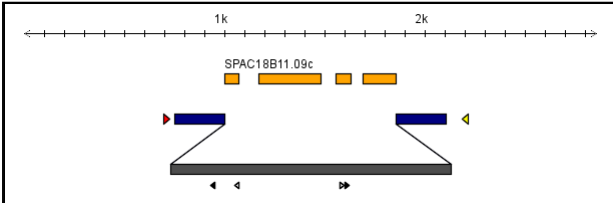

SPAC18B11.10

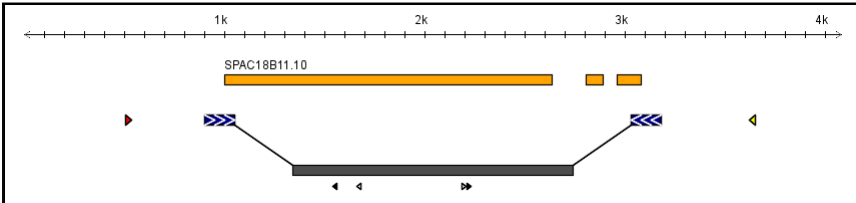

SPAC18G6.01c

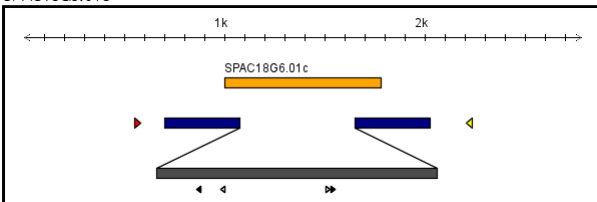

SPAC18G6.02c

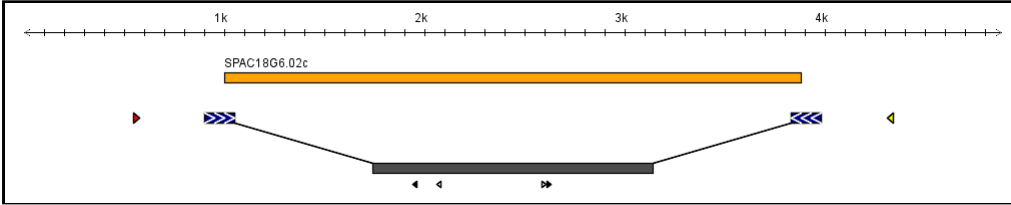

SPAC18G6.03

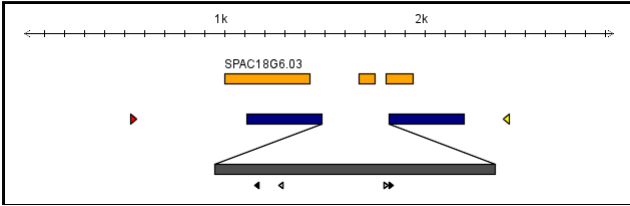

SPAC18G6.04c

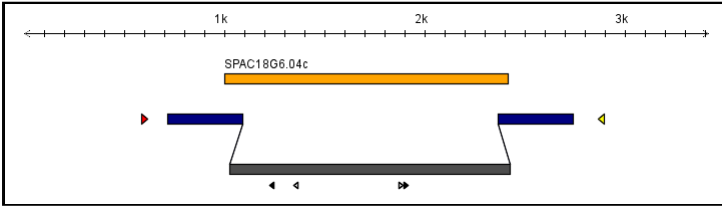

SPAC18G6.06

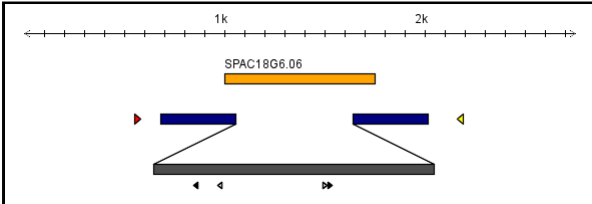

SPAC18G6.07c

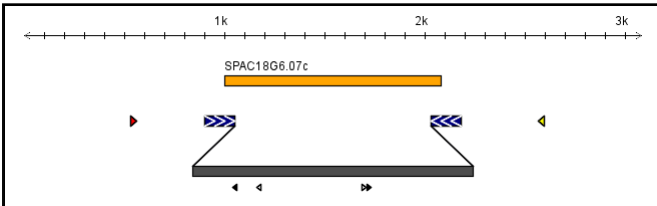

SPAC18G6.09c

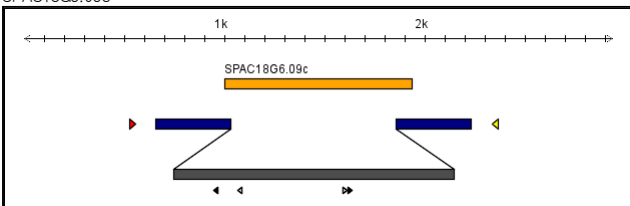

SPAC18G6.10

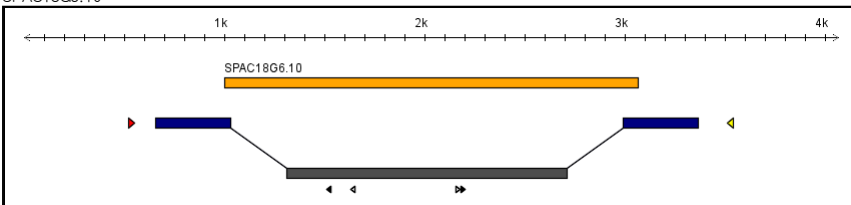

SPAC18G6.11c

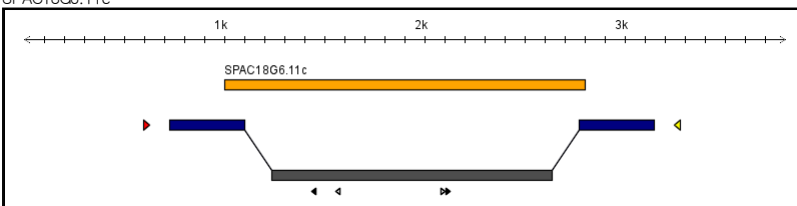

SPAC18G6.12c

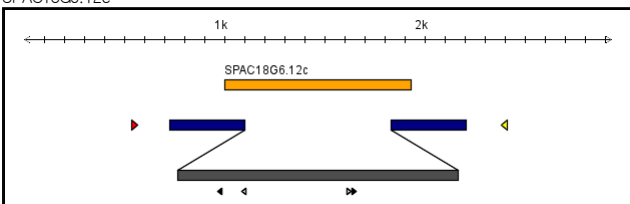

SPAC18G6.13

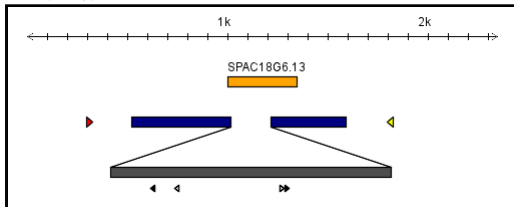

SPAC18G6.14c

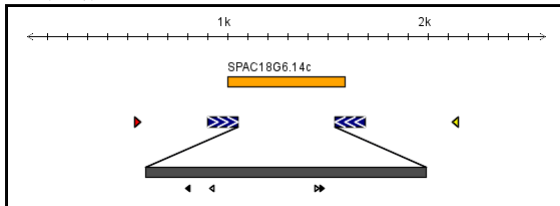

SPAC18G6.15

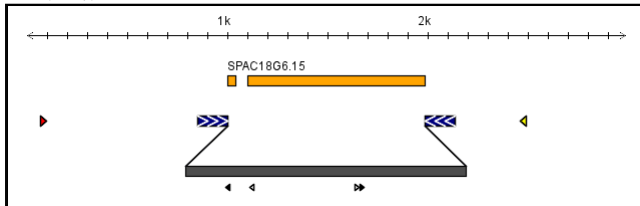

SPAC19A8.01c

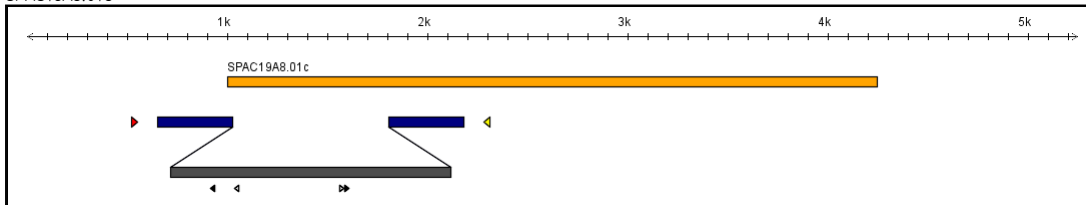

SPAC19A8.03

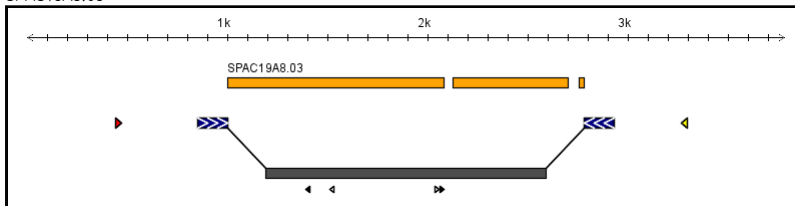

SPAC19A8.04

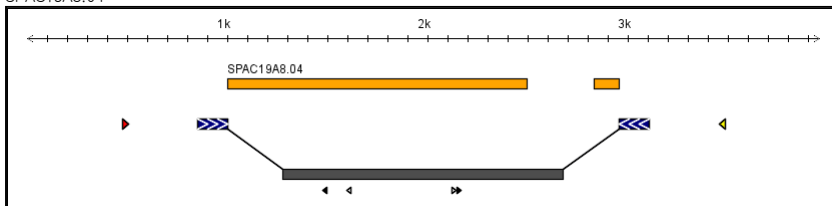

SPAC19A8.05c

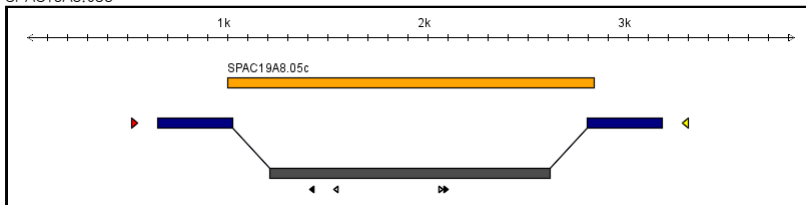

SPAC19A8.06

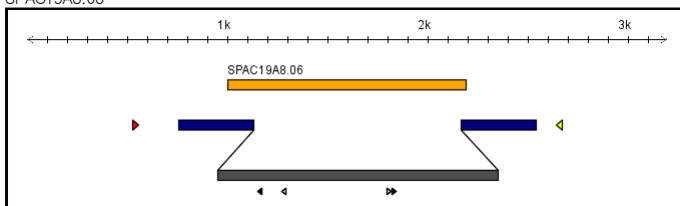

SPAC19A8.07c

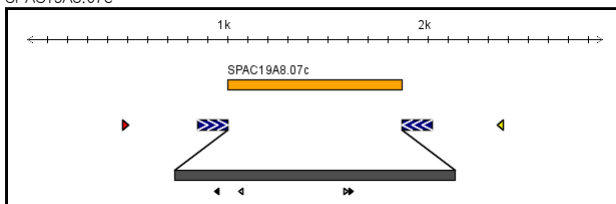

SPAC19A8.08

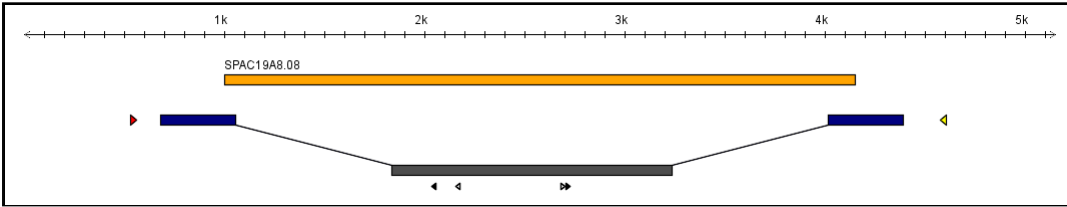

SPAC19A8.09

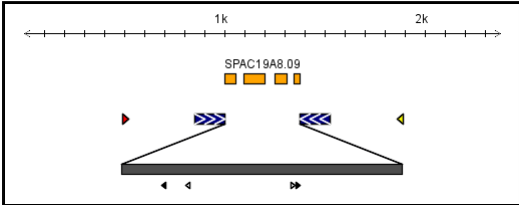

SPAC19A8.10

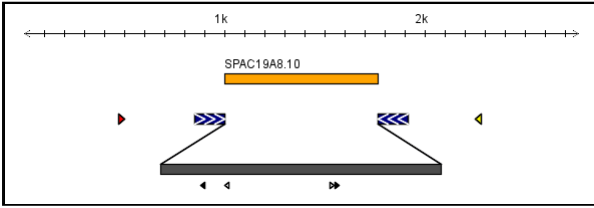

SPAC19A8.11c

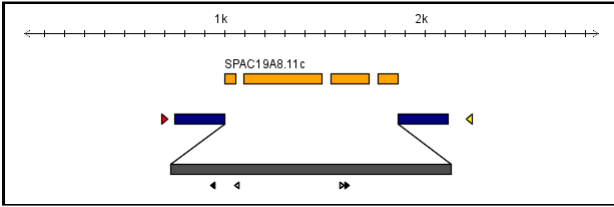

SPAC19A8.12

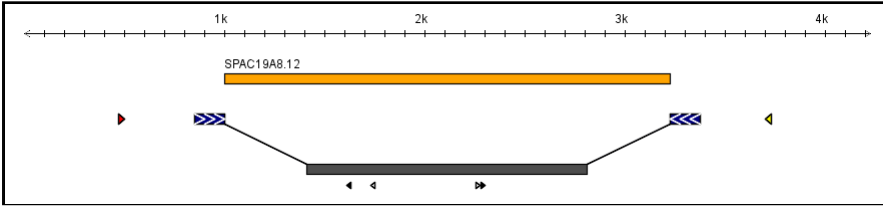

SPAC19A8.13

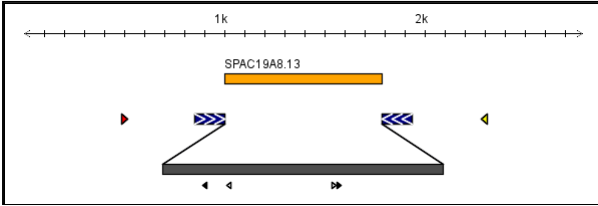

SPAC19A8.14

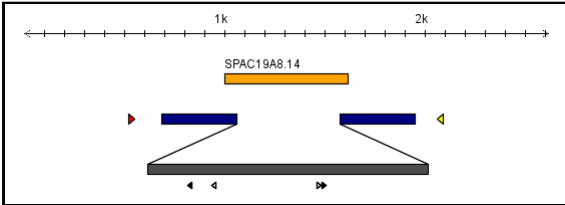

SPAC19A8.15

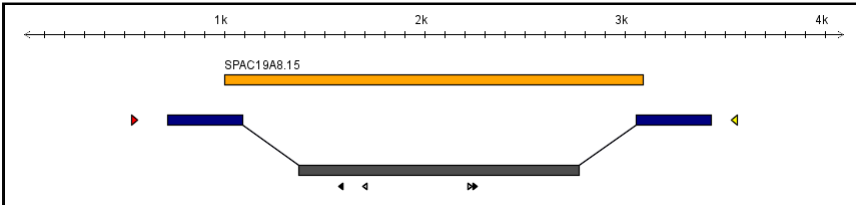

SPAC19B12.01

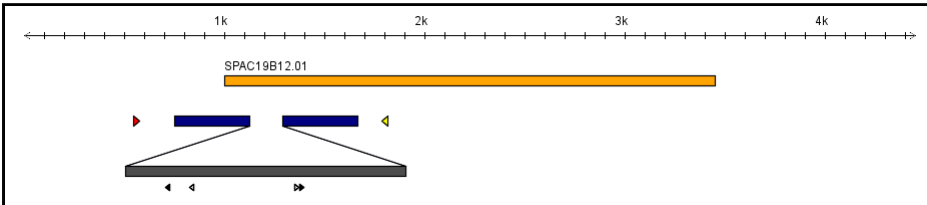

SPAC19B12.02c

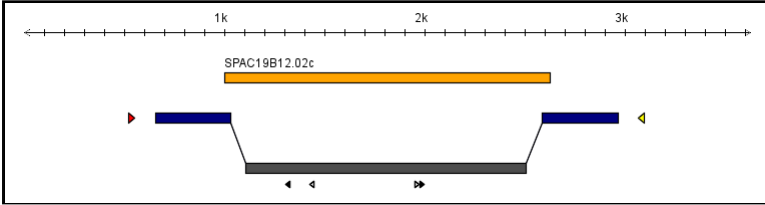

SPAC19B12.04

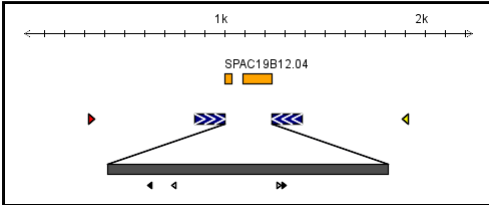

SPAC19B12.05c

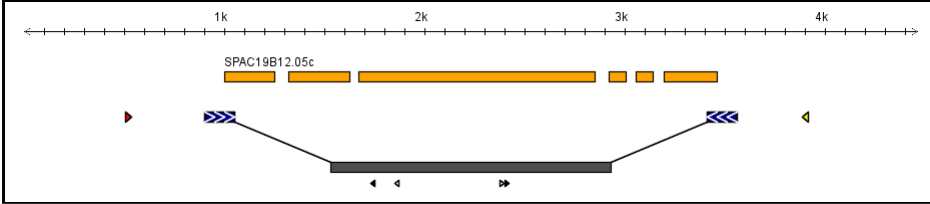

SPAC19B12.06c

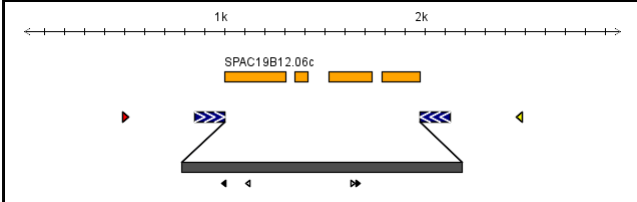

SPAC19B12.07c

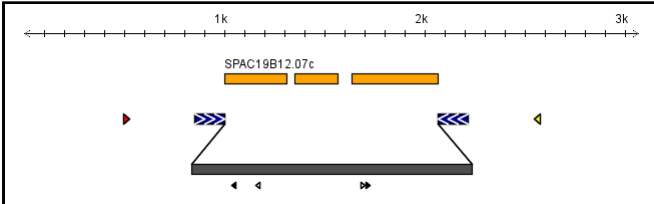

SPAC19B12.08

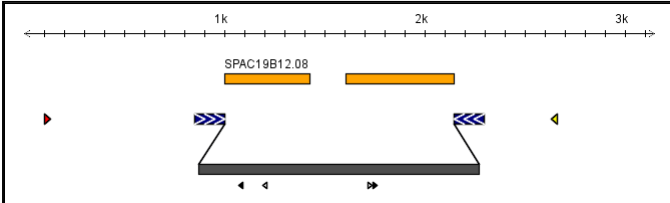

SPAC19B12.10

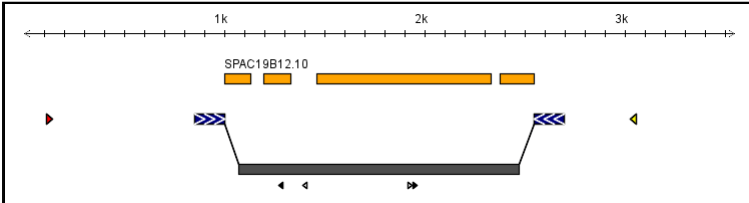

SPAC19B12.11c

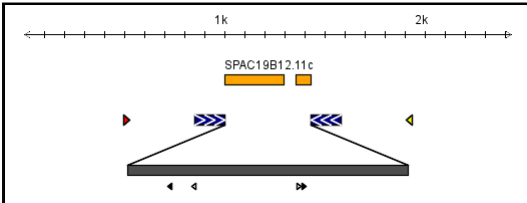

SPAC19B12.12c

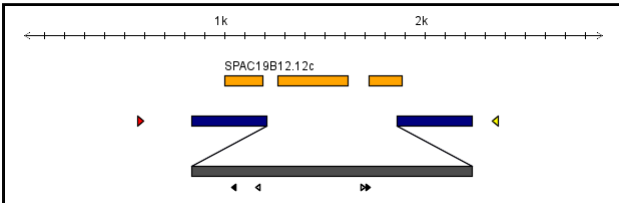

SPAC19B12.13

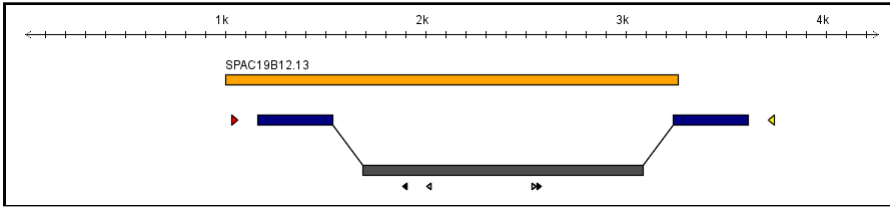

SPAC19D5.01

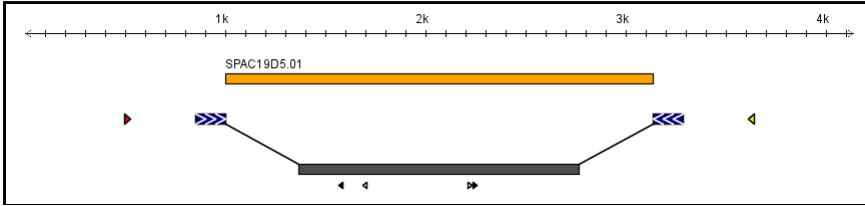

SPAC19D5.02c

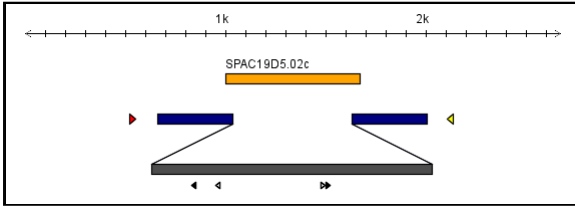

SPAC19D5.03

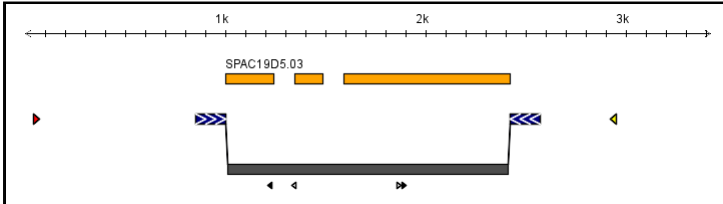

SPAC19D5.05c

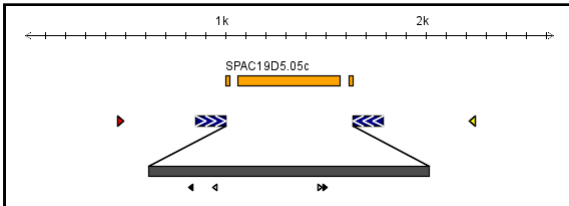

SPAC19D5.06c

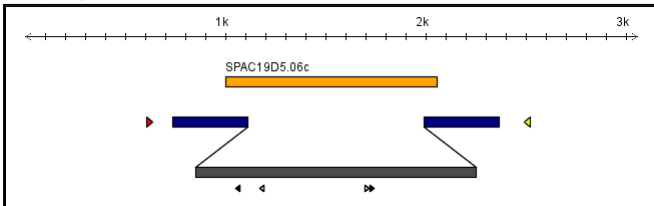

SPAC19D5.07

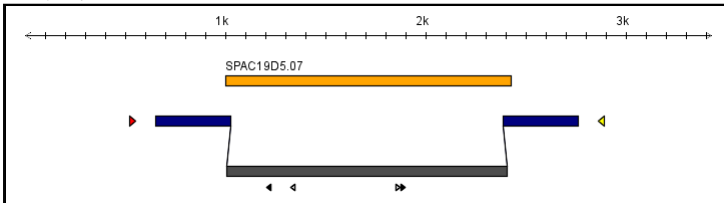

SPAC19D5.11c

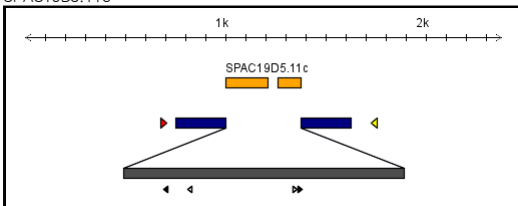

SPAC19E9.01c

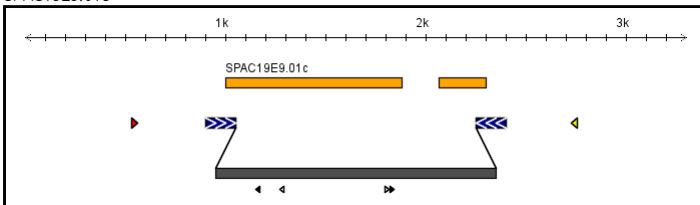

SPAC19E9.02

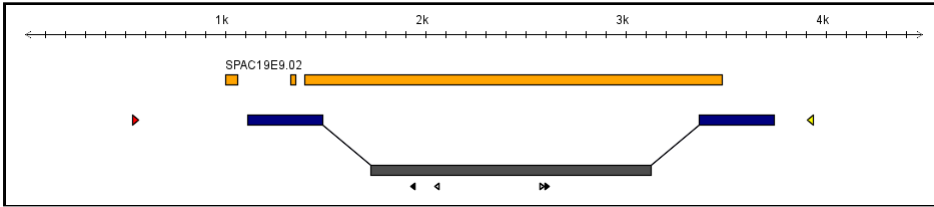

SPAC19E9.03

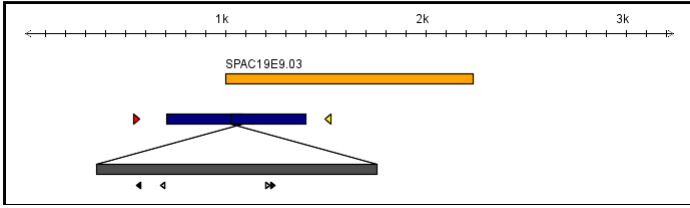

SPAC19G12.01c

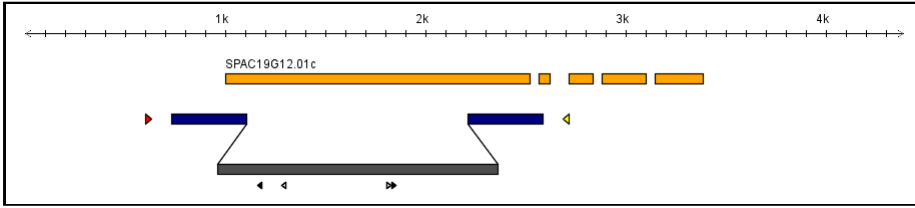

SPAC19G12.02c

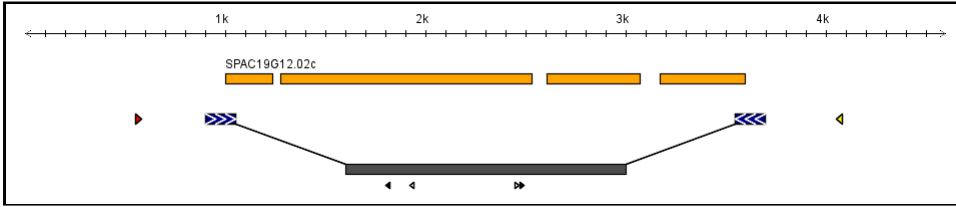

SPAC19G12.03

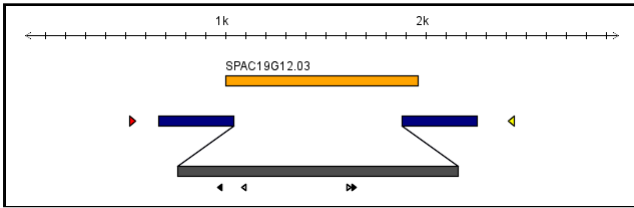

SPAC19G12.04

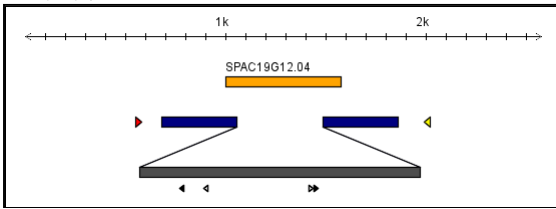

SPAC19G12.05

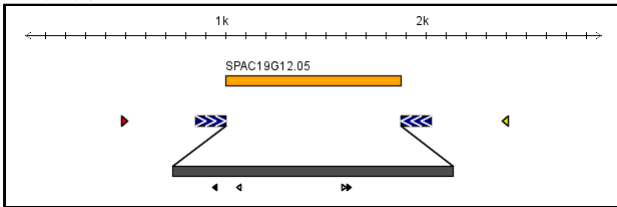

SPAC19G12.06c

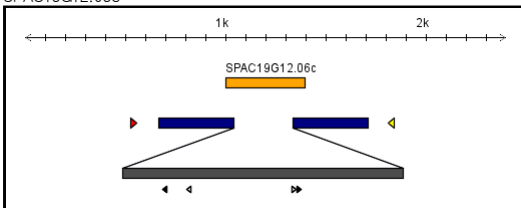

SPAC19G12.07c

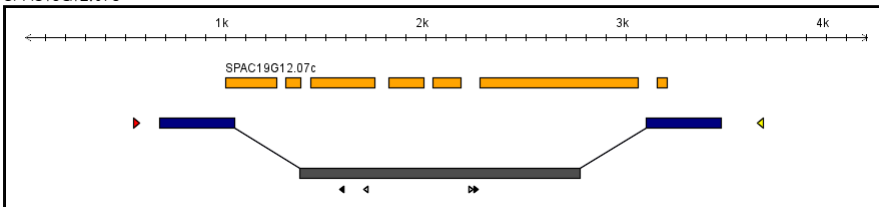

SPAC19G12.08

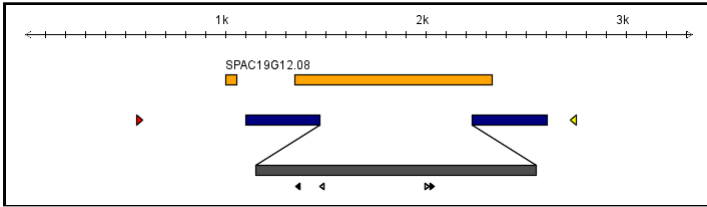

SPAC19G12.09

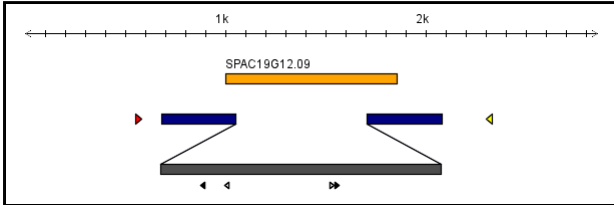

SPAC19G12.11

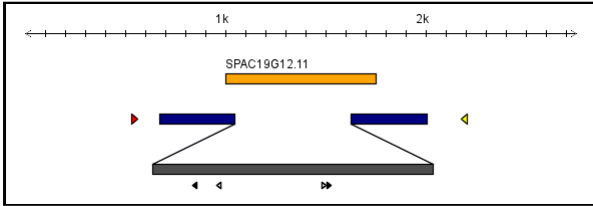

SPAC19G12.12

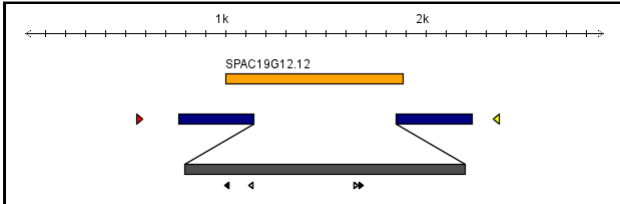

SPAC19G12.13c

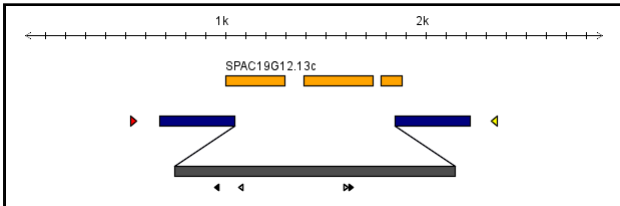

SPAC19G12.14

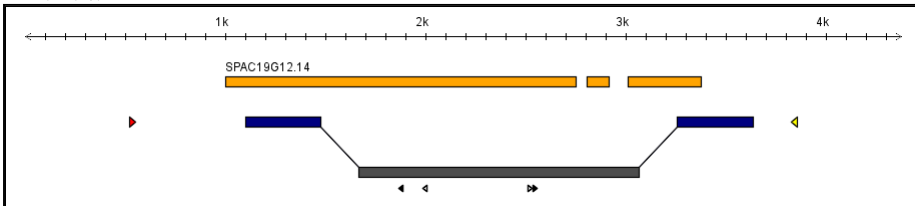

SPAC19G12.15c

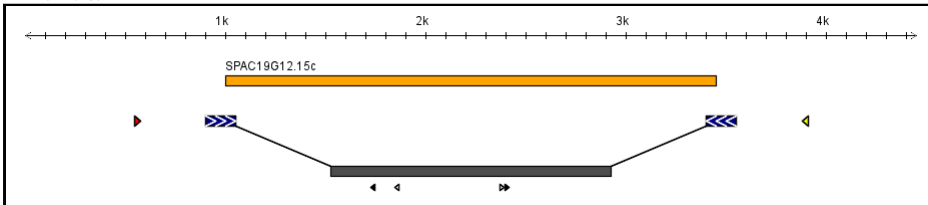

SPAC19G12.16c

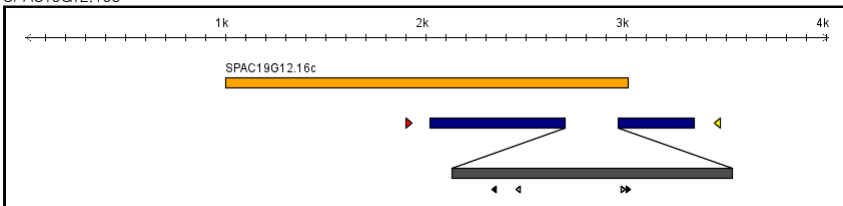

SPAC1A6.01c

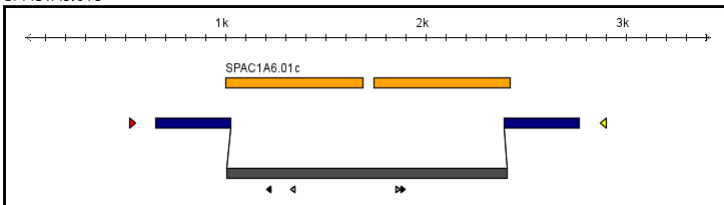



SPAC1A6.02

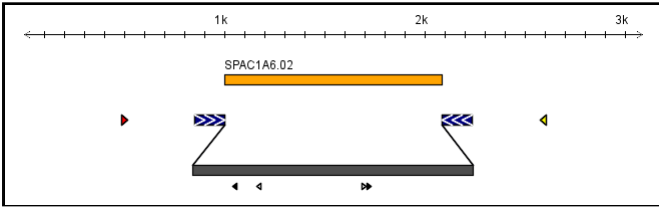

SPAC1A6.03c

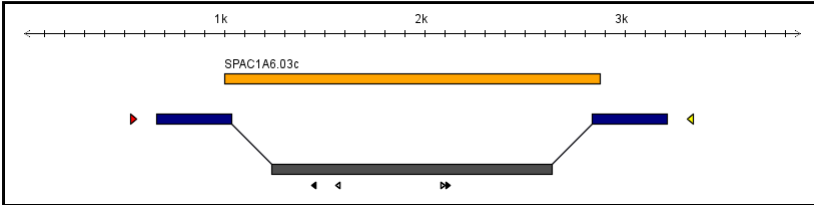

SPAC1A6.04c

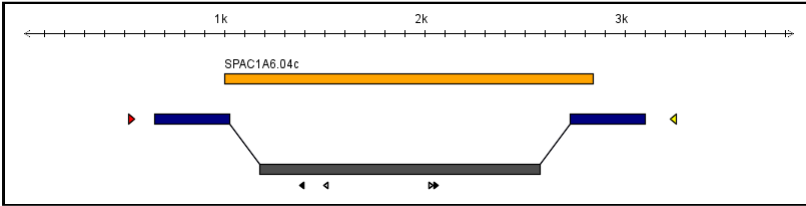

SPAC1A6.05c

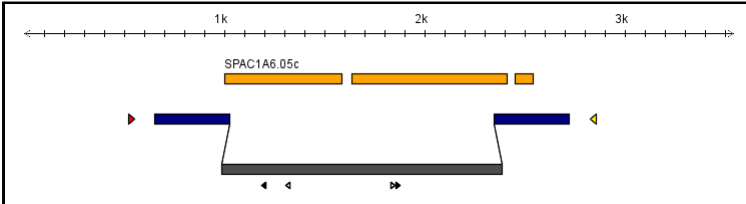

SPAC1A6.06c

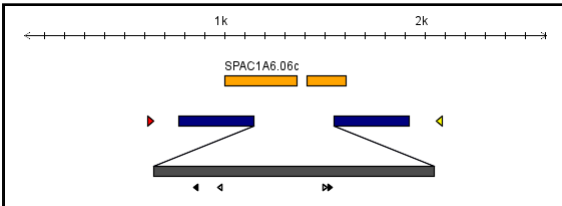

SPAC1A6.07

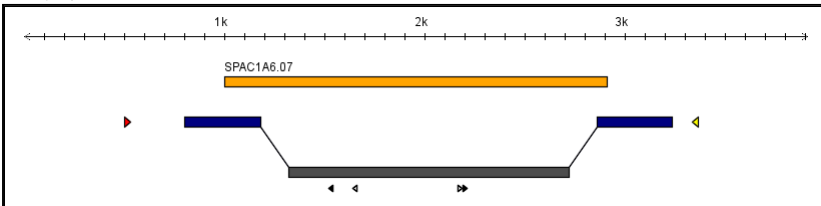

SPAC1A6.08c

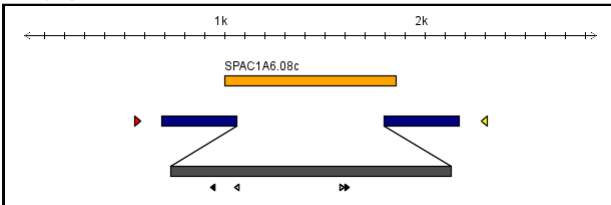

SPAC1A6.09c

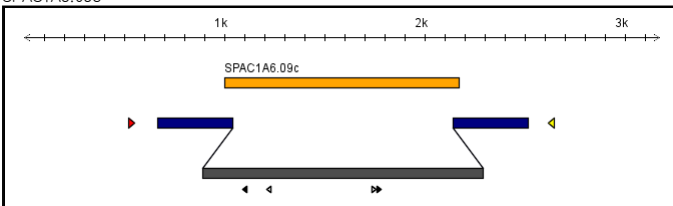

SPAC1A6.10

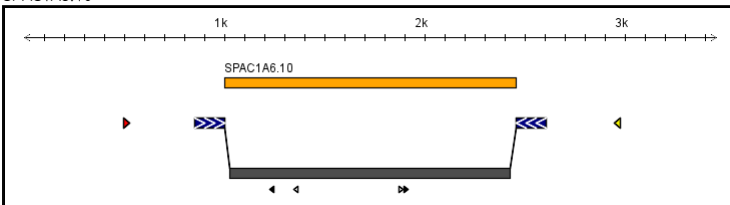

SPAC1B1.01

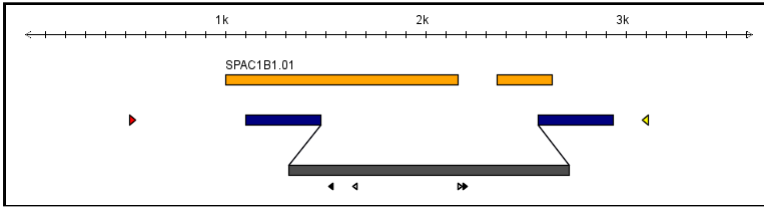

SPAC1B1.02c

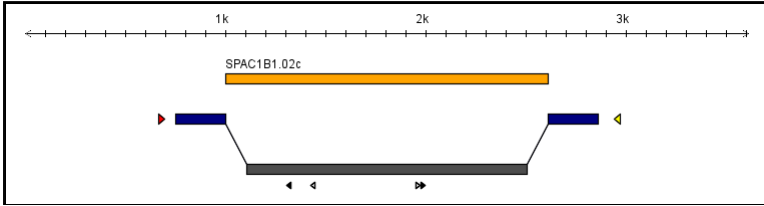

SPAC1B1.03c

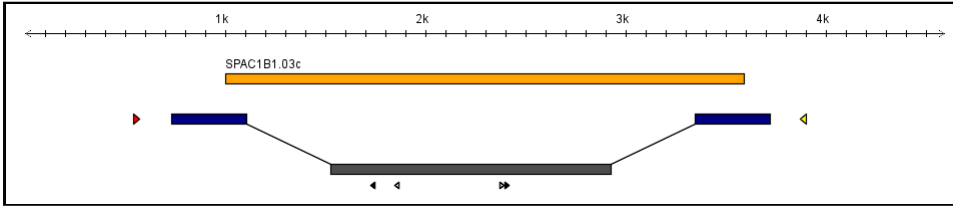

SPAC1B1.04c

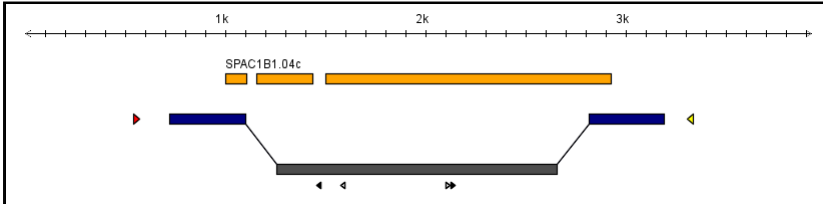

SPAC1B2.02c

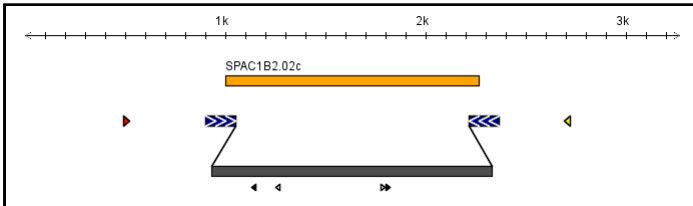

SPAC1B2.03c

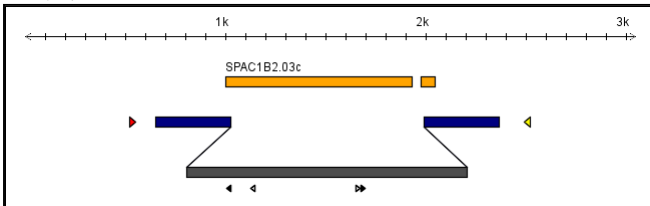

SPAC1B2.04

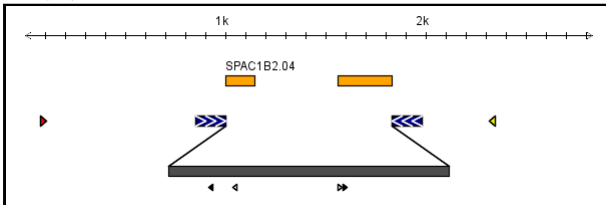

SPAC1B2.05

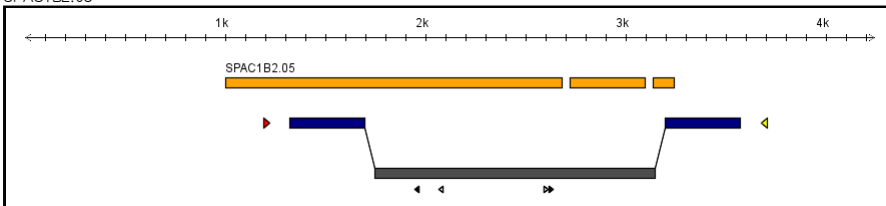

SPAC1B3.01c

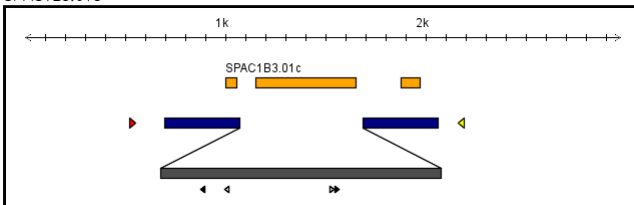

SPAC1B3.02c

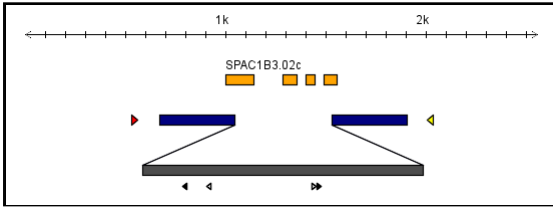

SPAC1B3.03c

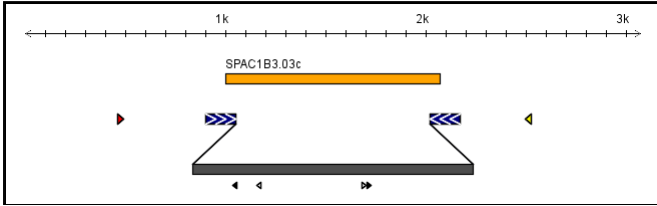

SPAC1B3.04c

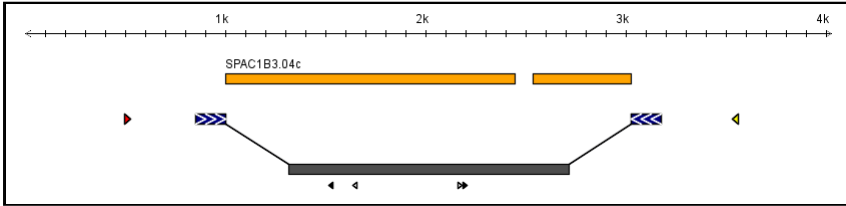

SPAC1B3.05

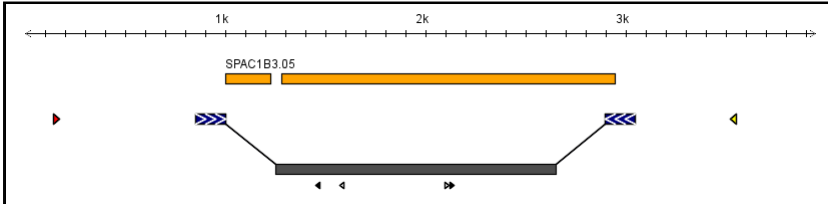

SPAC1B3.06c

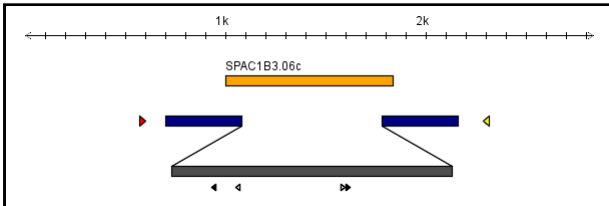

SPAC1B3.07c

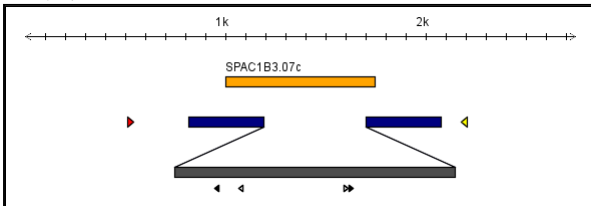

SPAC1B3.08

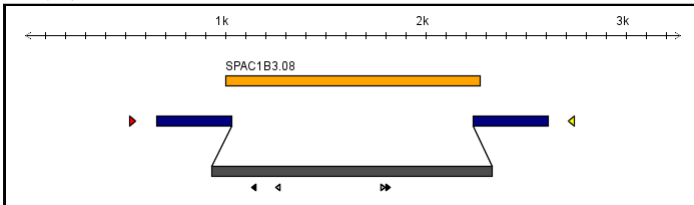

SPAC1B3.09c

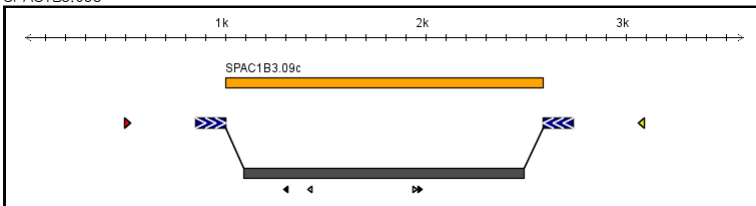

SPAC1B3.10c

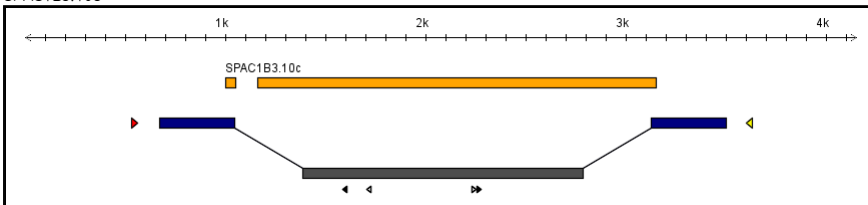

SPAC1B3.11c

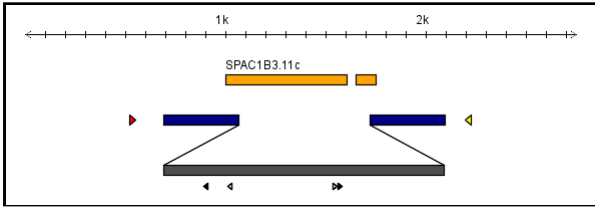

SPAC1B3.12c

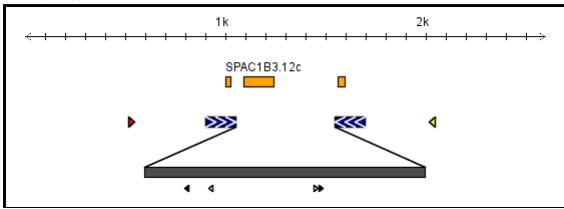

SPAC1B3.13

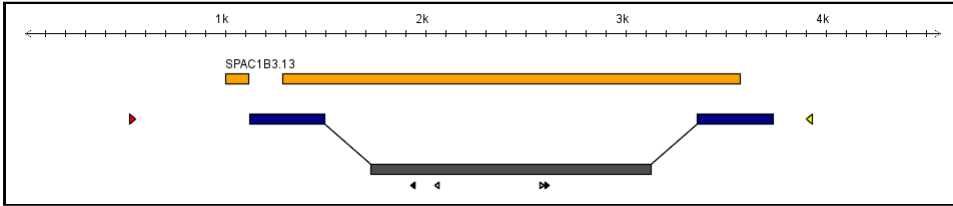

SPAC1B3.14

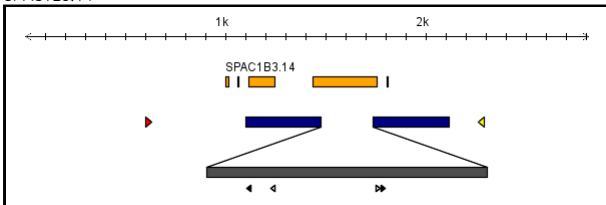

SPAC1B3.15c

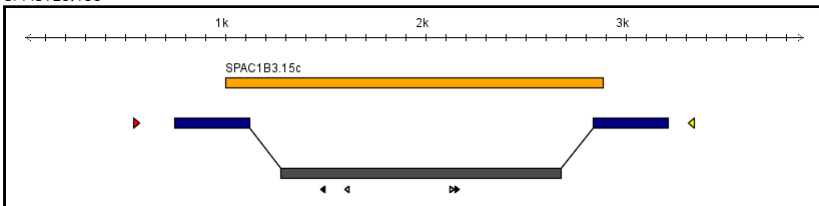

SPAC1B3.16c

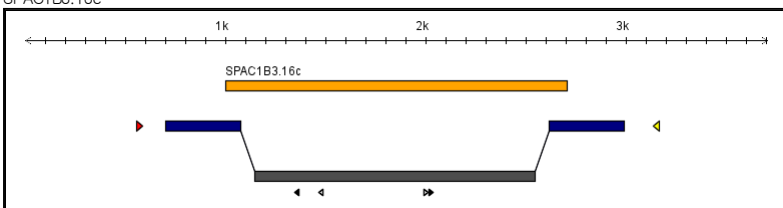

SPAC1B3.17

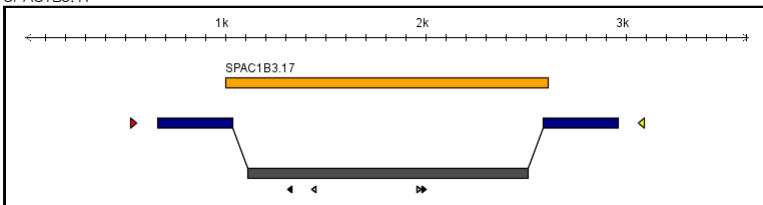

SPAC1B3.18c

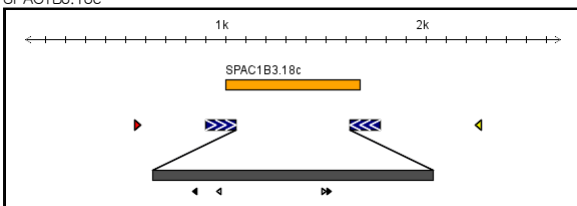

SPAC1B3.20

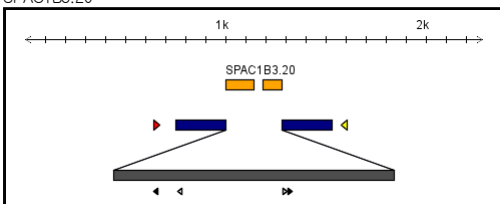

SPAC1B9.02c

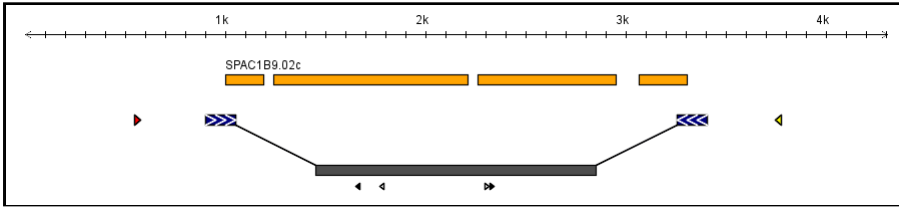

SPAC1B9.03c

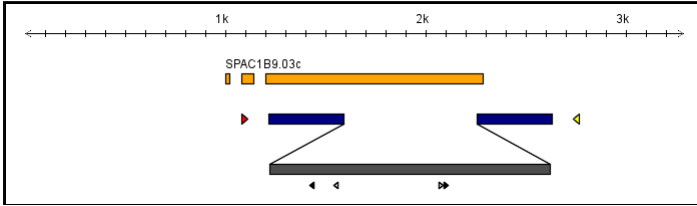

SPAC1D4.01

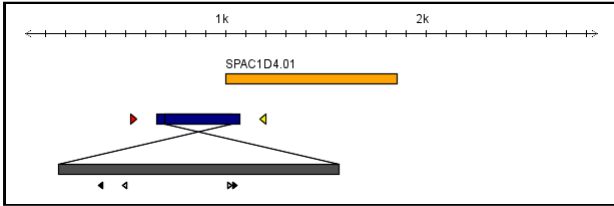

SPAC1D4.02c

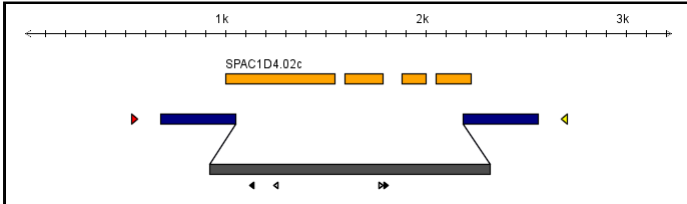

SPAC1D4.03c

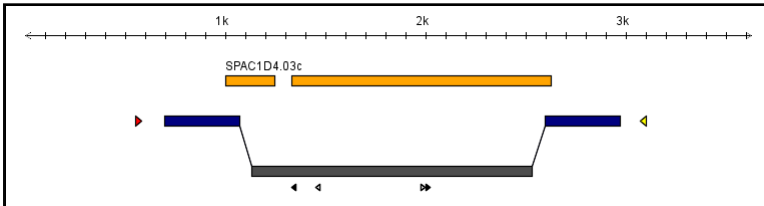

SPAC1D4.04

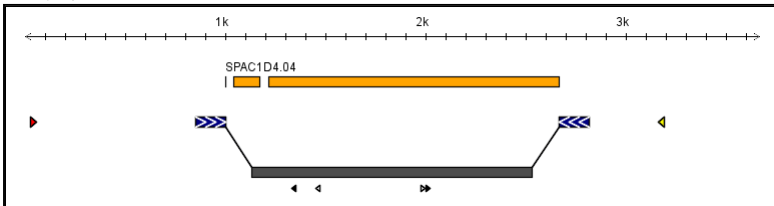

SPAC1D4.05c

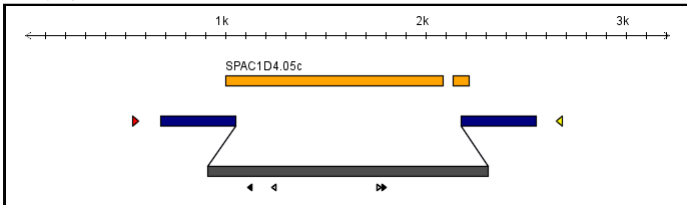

SPAC1D4.06c

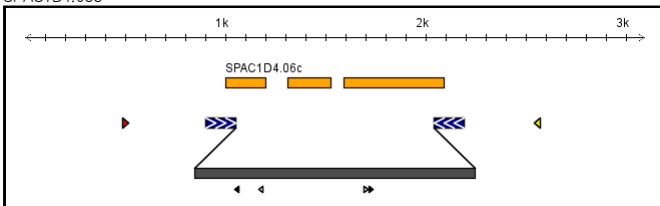

SPAC1D4.08

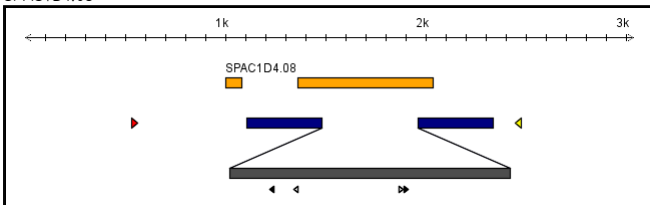

SPAC1D4.09c

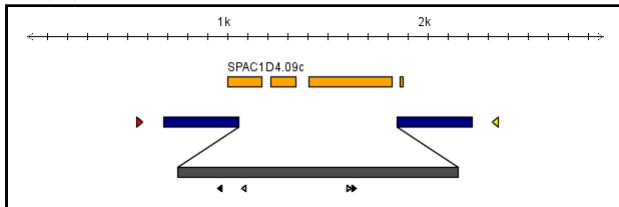

SPAC1D4.10

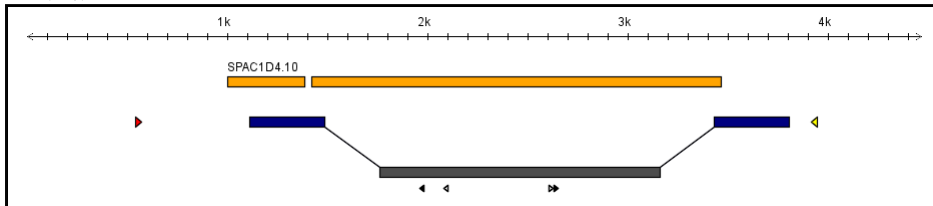

SPAC1D4.11c

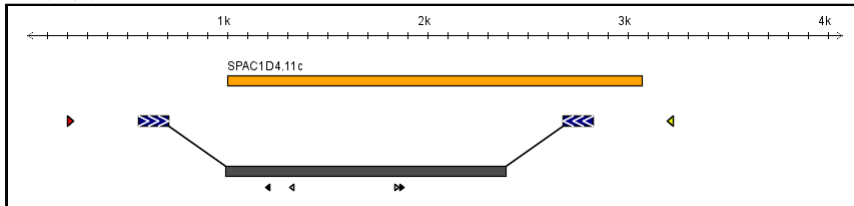

SPAC1D4.12

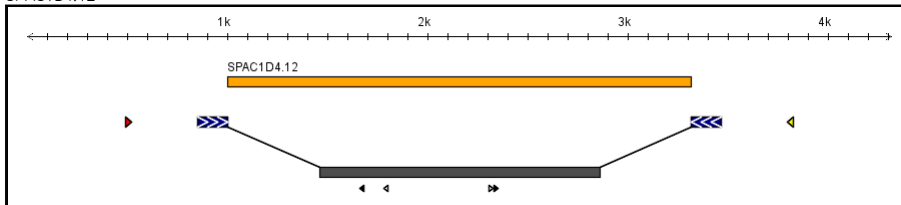

SPAC1D4.13

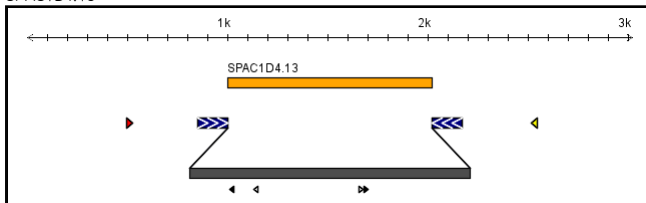

SPAC1F12.02c

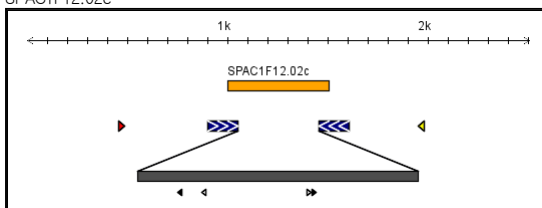

SPAC1F12.04c

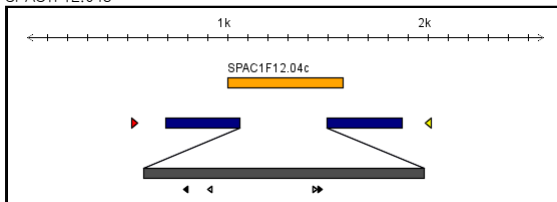

SPAC1F12.05

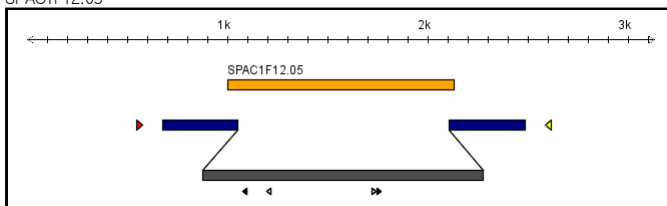

SPAC1F12.06c

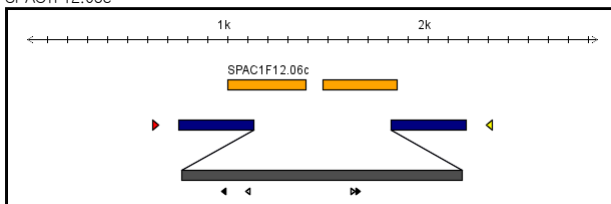

SPAC1F12.07

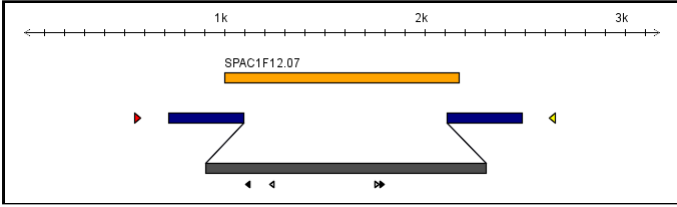

SPAC1F12.08

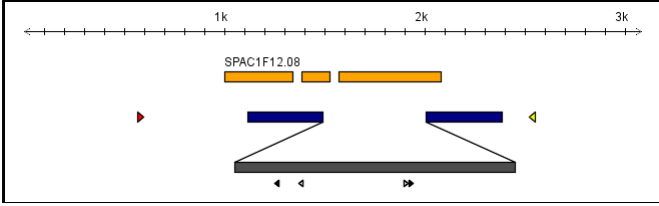

SPAC1F12.09

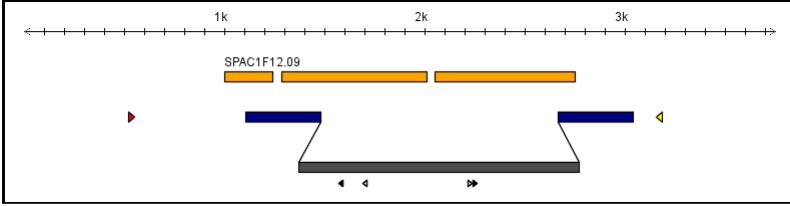

SPAC1F12.10c

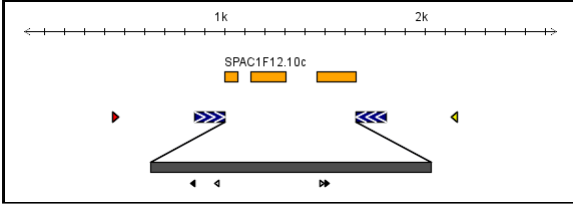

SPAC1F3.01

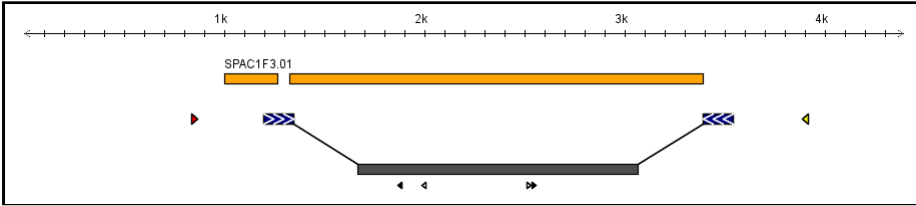

SPAC1F3.03

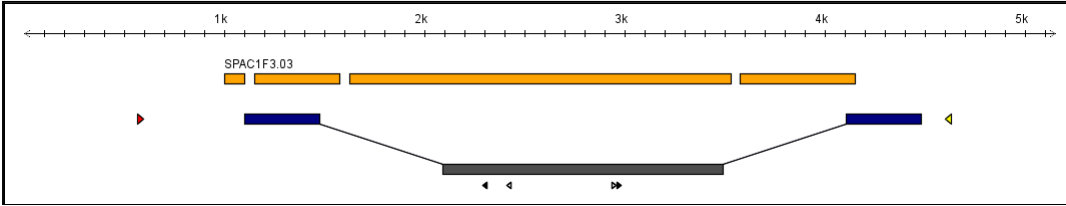

SPAC1F3.05

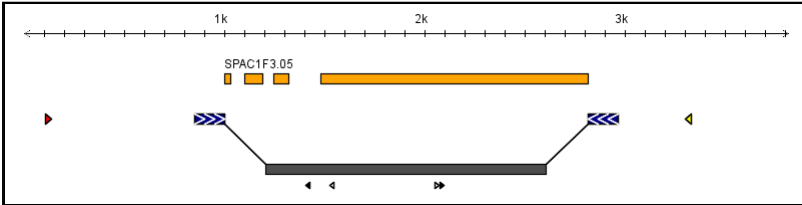

SPAC1F3.07c

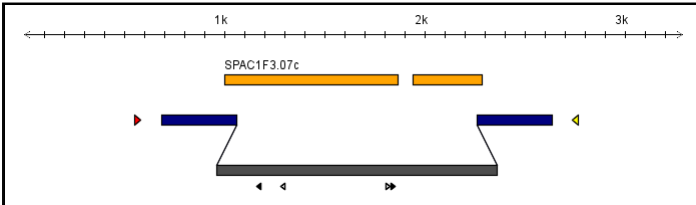

SPAC1F3.09

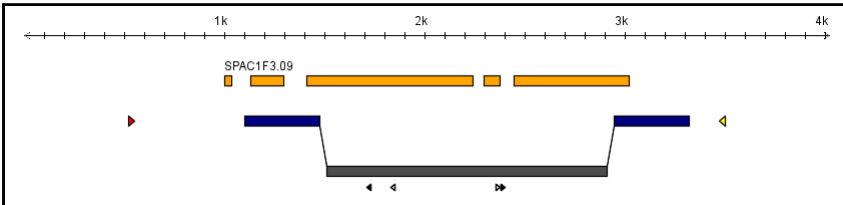

SPAC1F3.10c

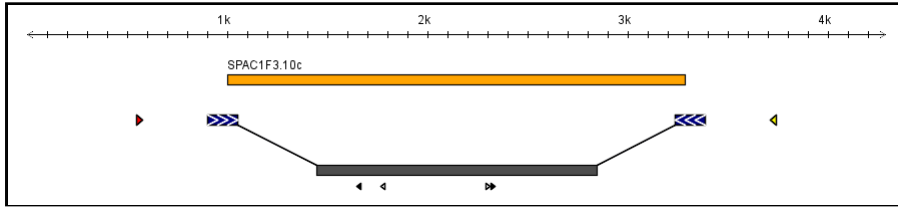

SPAC1F5.02

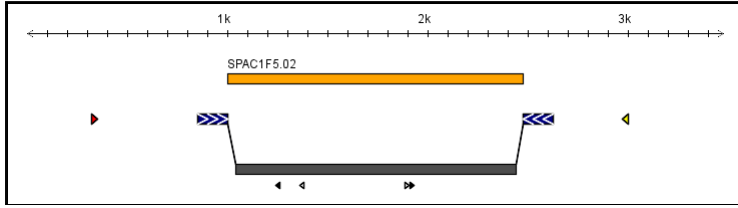

SPAC1F5.03c

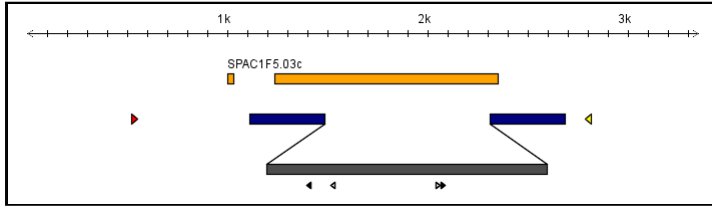

SPAC1F5.05c

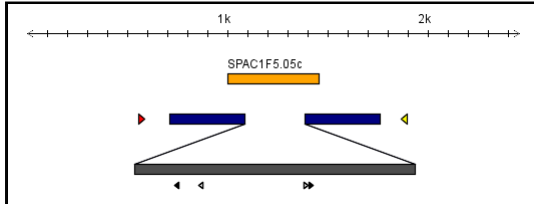

SPAC1F5.06

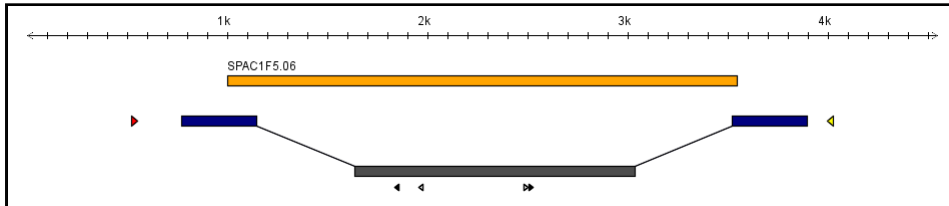

SPAC1F5.07c

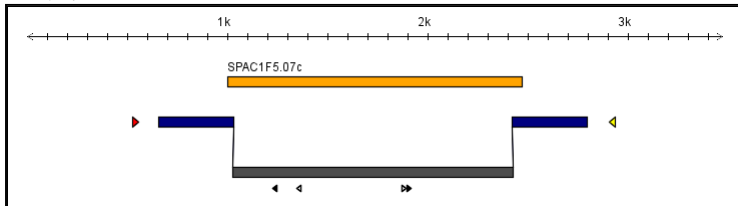

SPAC1F5.08c

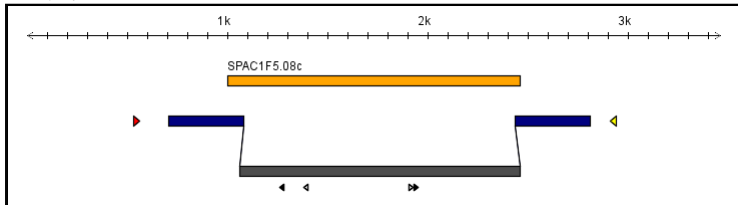

SPAC1F5.09c

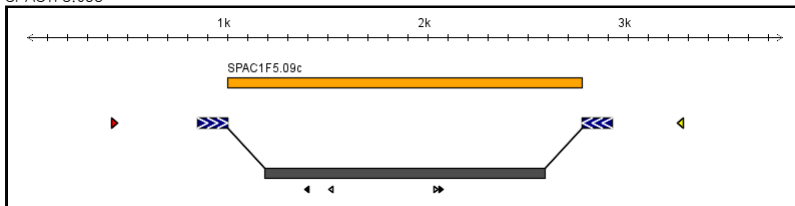

SPAC1F5.10

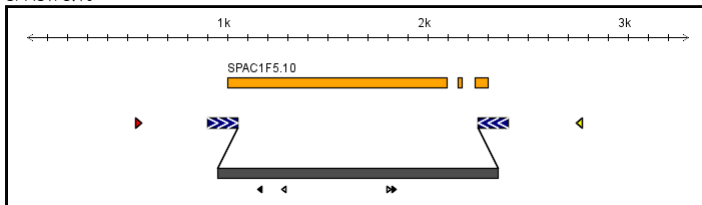



SPAC1F7.02c

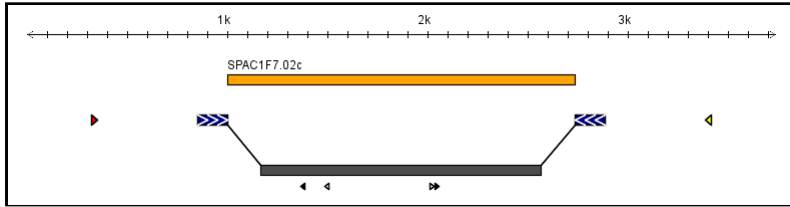

SPAC1F7.03

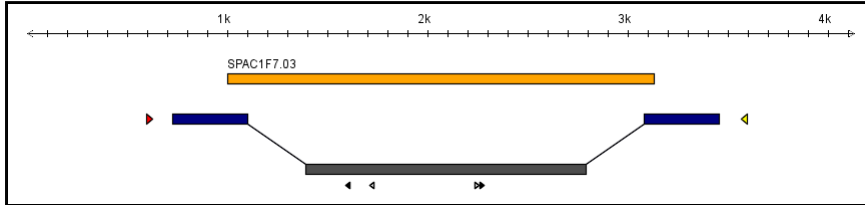

SPAC1F7.04

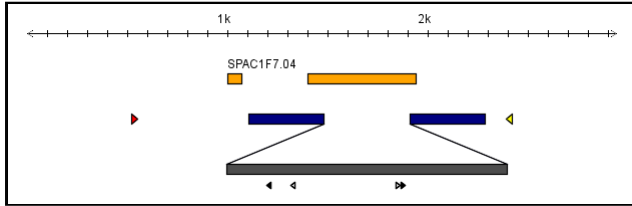

SPAC1F7.05

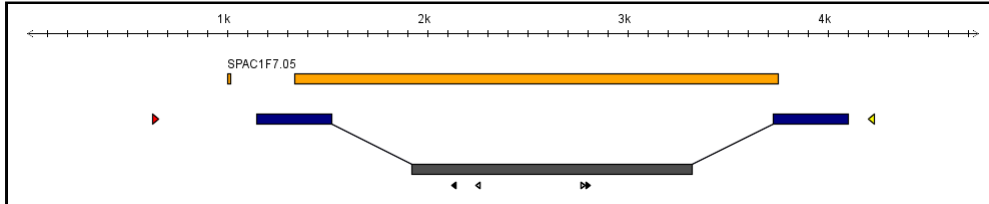

SPAC1F7.06

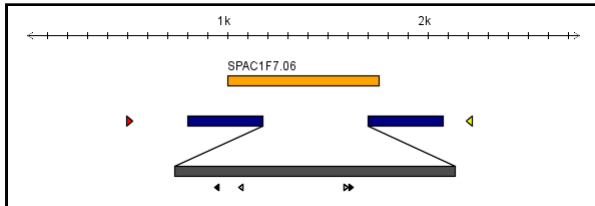

SPAC1F7.07c

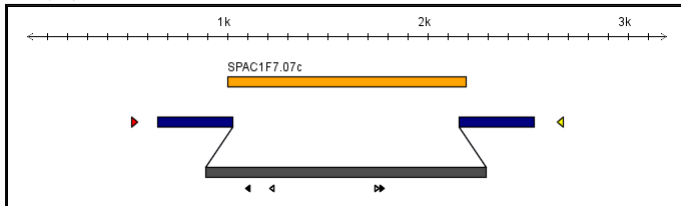

SPAC1F7.08

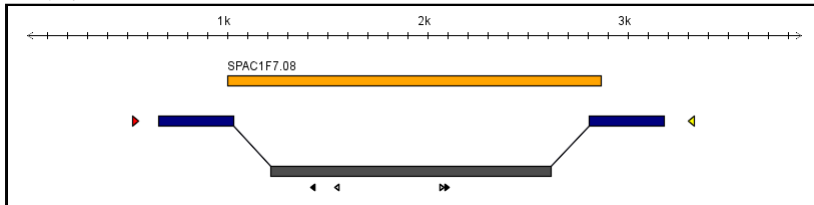

SPAC1F7.09c

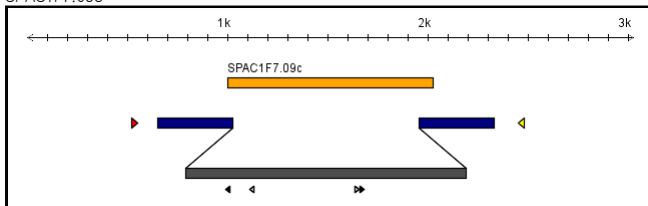

SPAC1F7.10

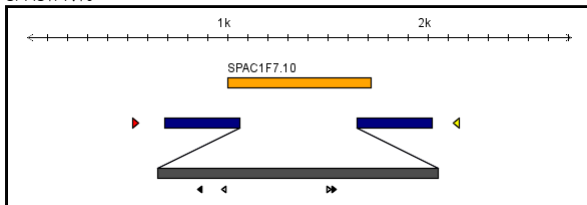

SPAC1F7.11c

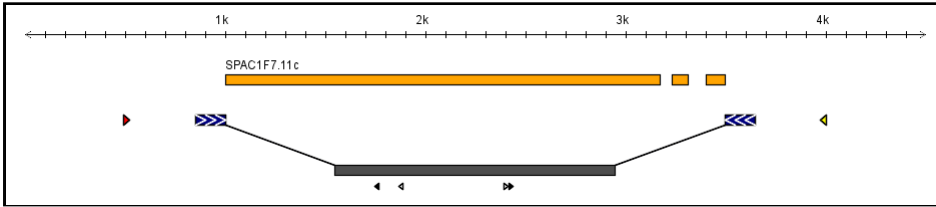

SPAC1F7.12

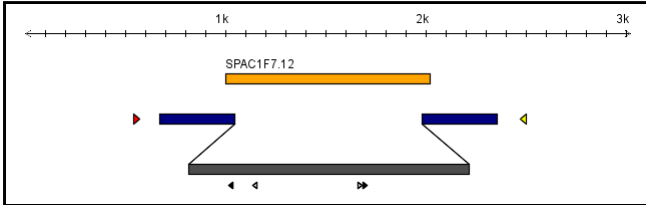

SPAC1F7.13c

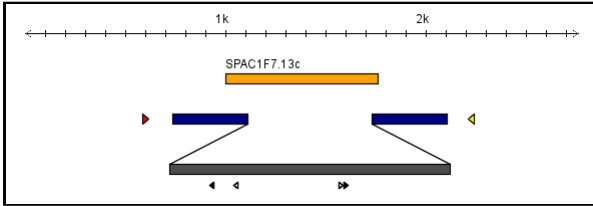

SPAC1F8.01

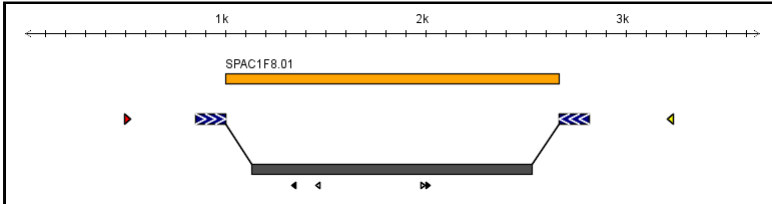

SPAC1F8.02c

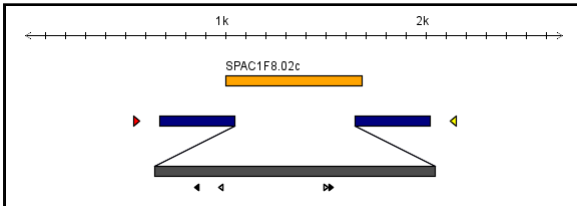

SPAC1F8.03c

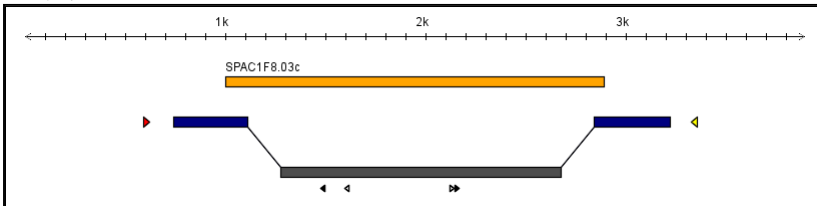

SPAC1F8.04c

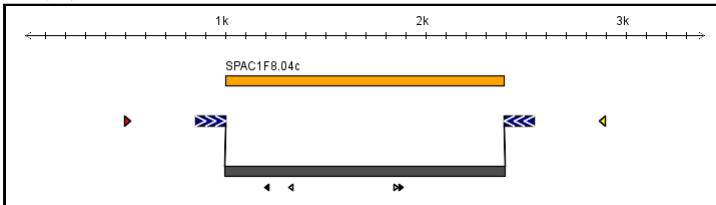

SPAC1F8.05

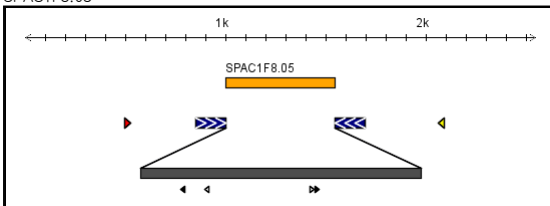

SPAC1F8.06

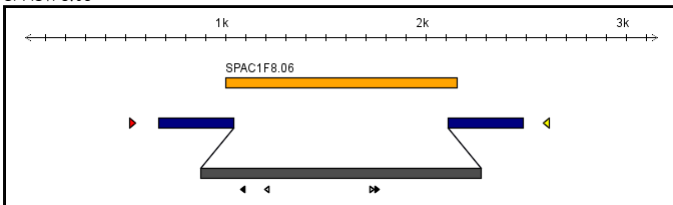

SPAC1F8.07c

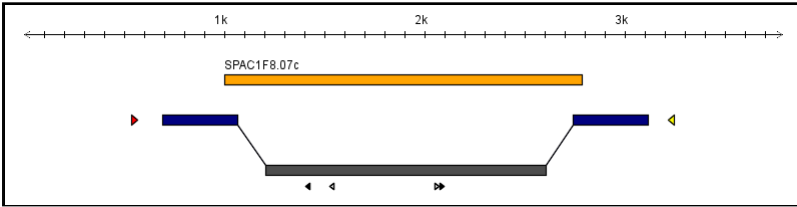

SPAC1F8.08

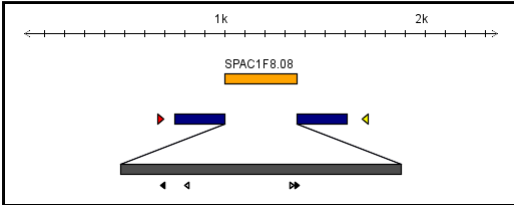

SPAC20G4.01

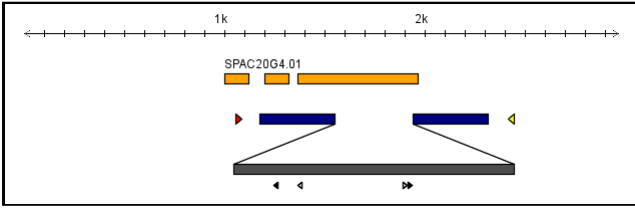

SPAC20G4.03c

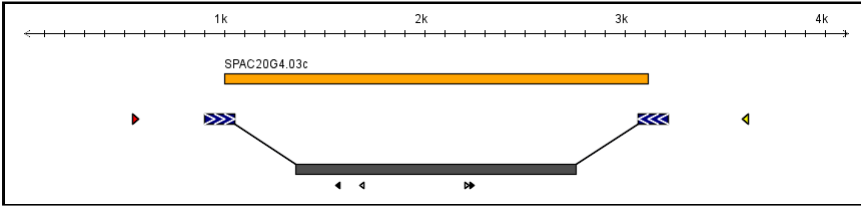

SPAC20G4.04c

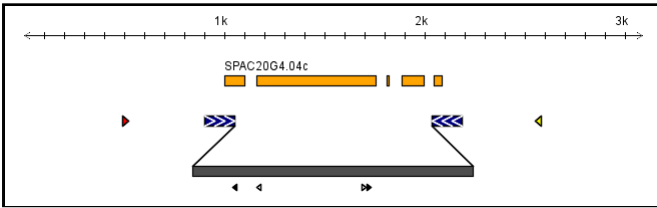

SPAC20G4.05c

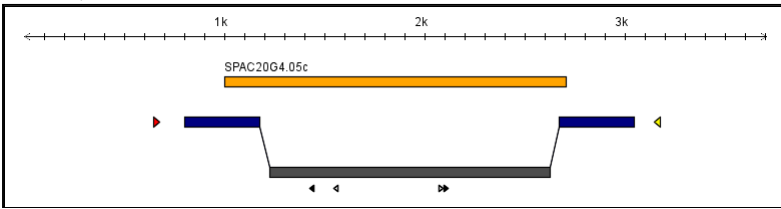

SPAC20G4.06c

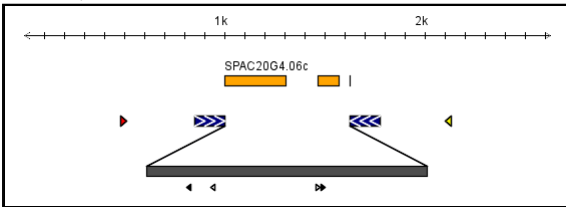

SPAC20G4.07c

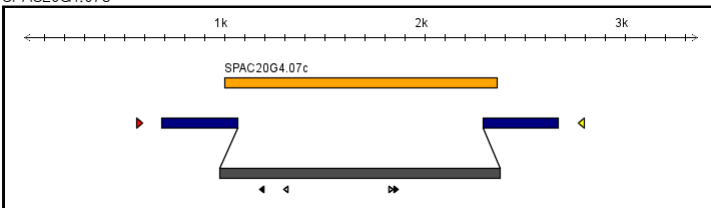

SPAC20G4.08

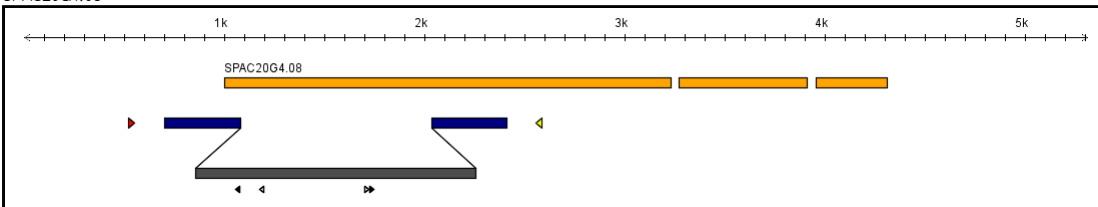

SPAC20G8.01

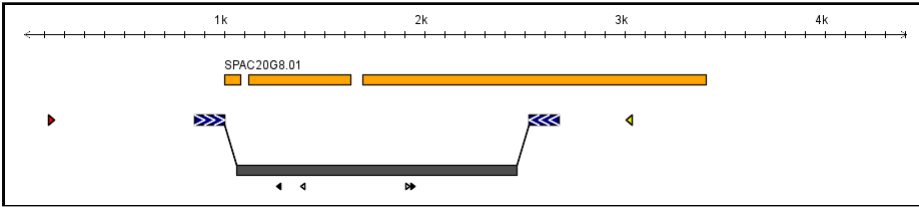

SPAC20G8.02

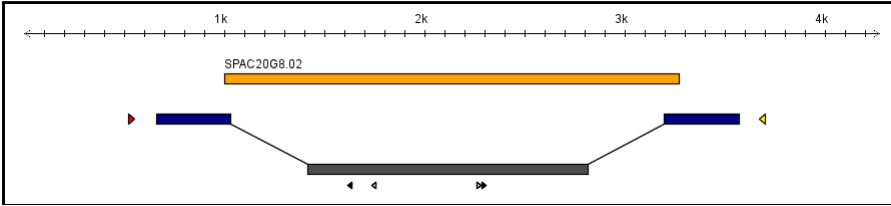

SPAC20G8.03

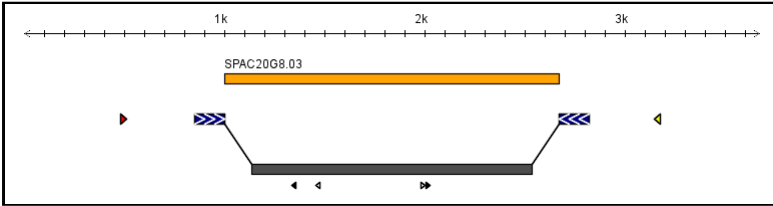

SPAC20G8.04c

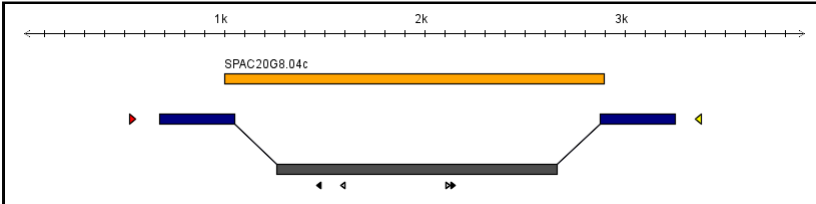

SPAC20G8.05c

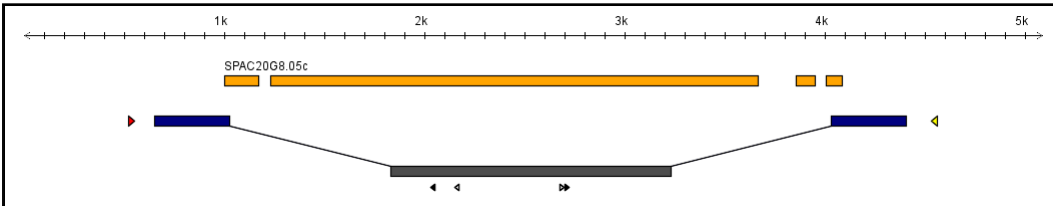

SPAC20G8.07c

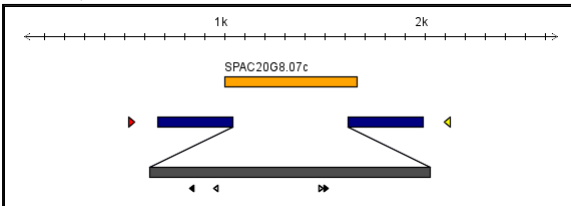

SPAC20G8.10c

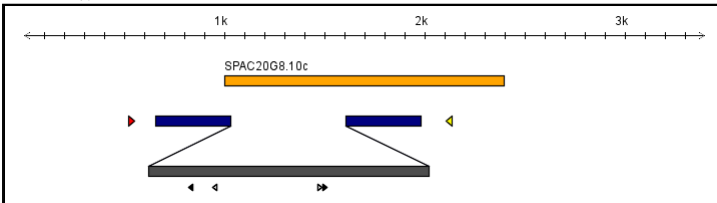

SPAC2C4.03c

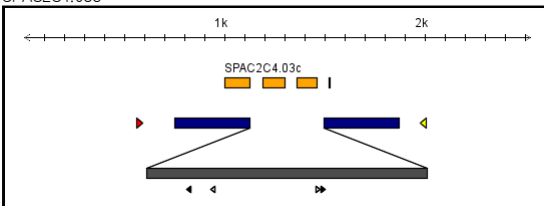

SPAC2C4.04c

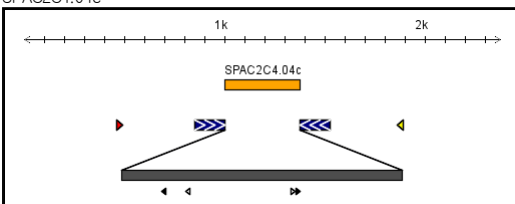

SPAC2C4.05

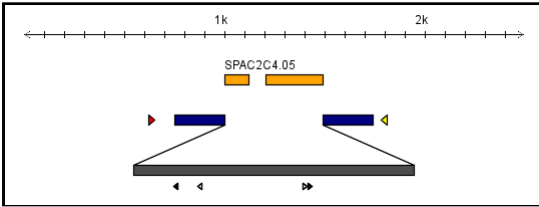

SPAC2C4.06c

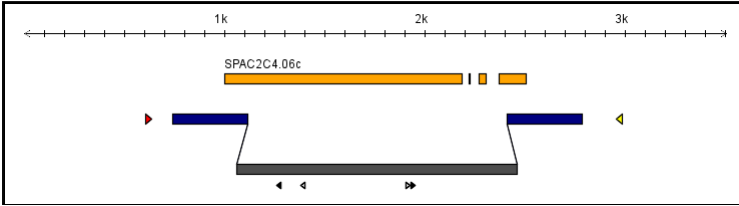

SPAC2C4.08

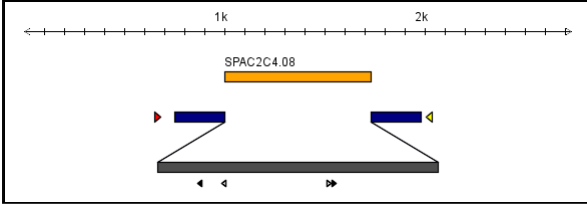

SPAC2C4.09

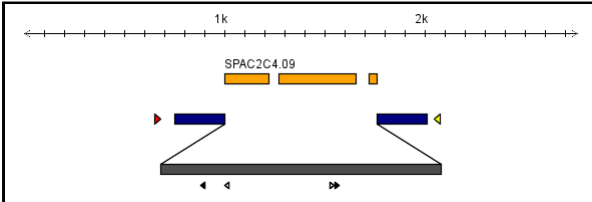

SPAC2C4.10c

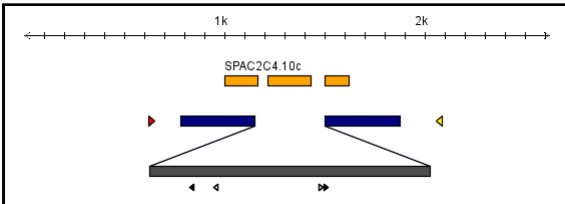

SPAC2C4.11c

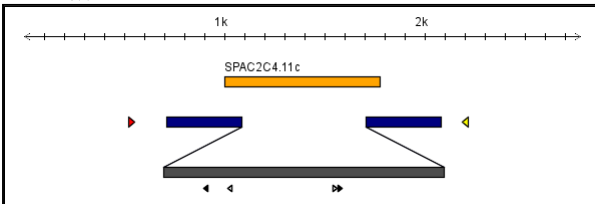

SPAC2C4.12c

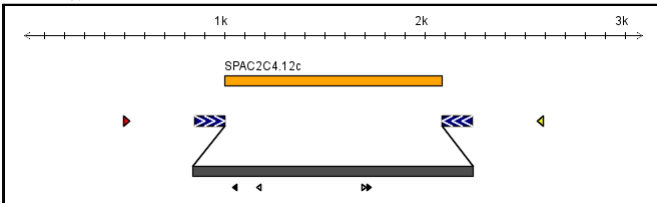

SPAC2C4.13

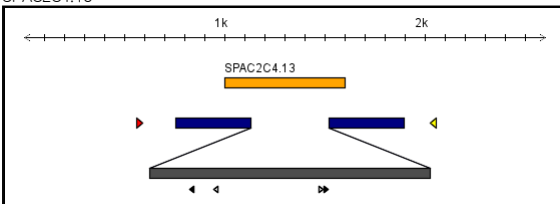

SPAC2C4.14c

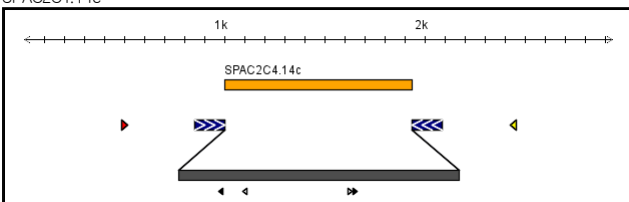

SPAC2C4.15c

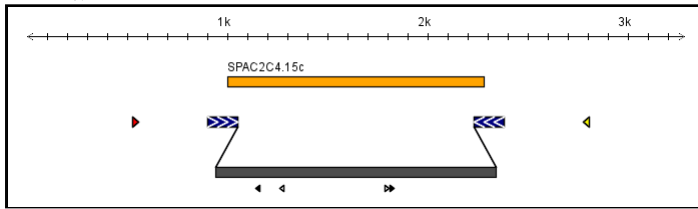

SPAC2C4.16c

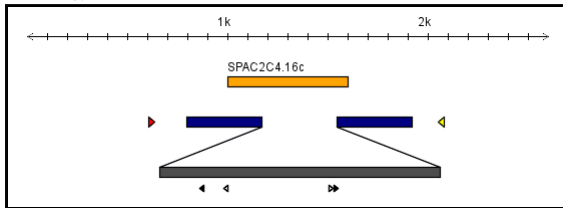

SPAC2C4.17c

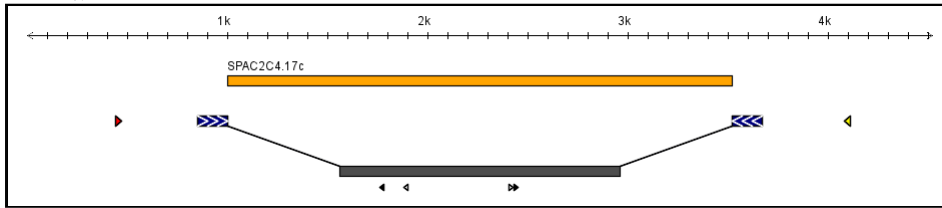

SPAC2E12.02

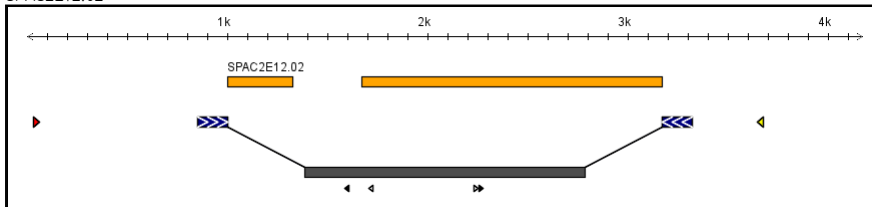

SPAC2E12.03c

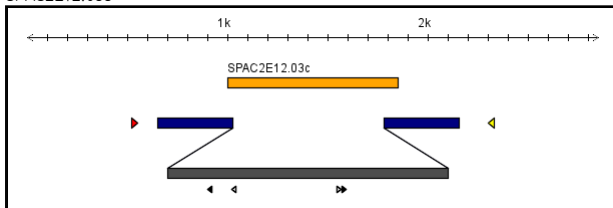

SPAC2E1P3.01

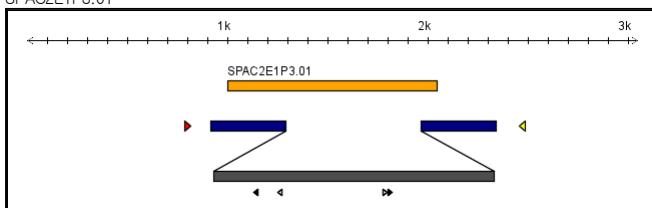

SPAC2E1P3.02c

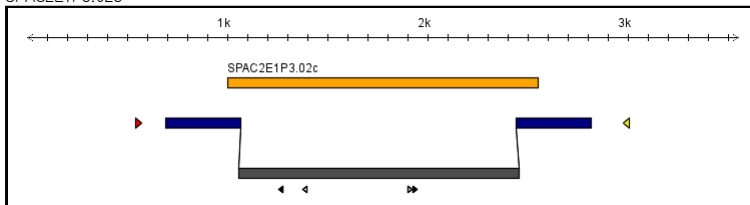

SPAC2E1P3.04

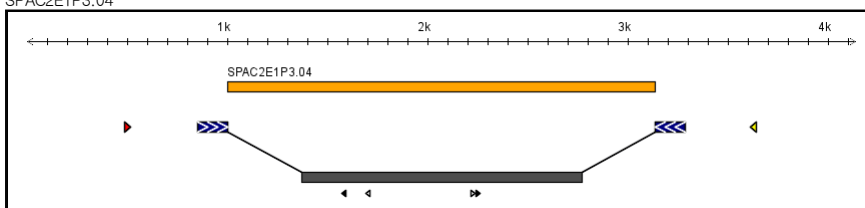

SPAC2E1P3.05c

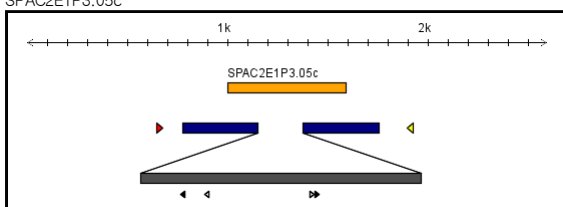

SPAC2E1P5.01c

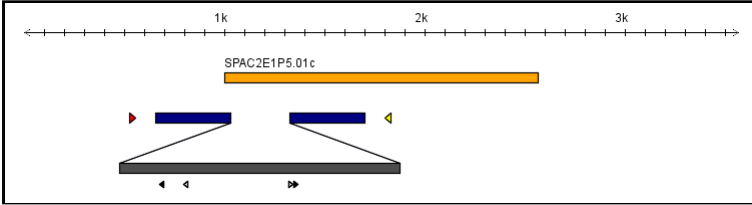

SPAC2E1P5.02c

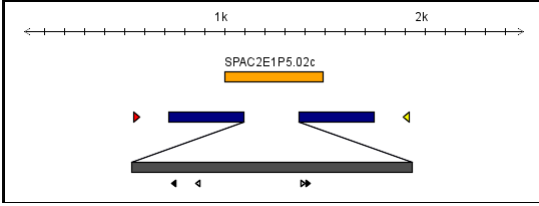

SPAC2E1P5.03

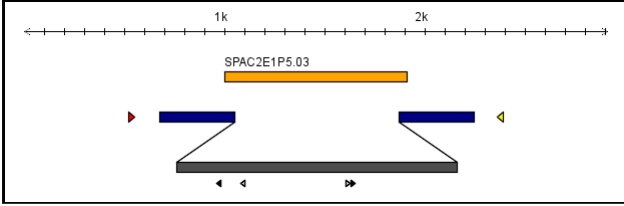

SPAC2E1P5.04c

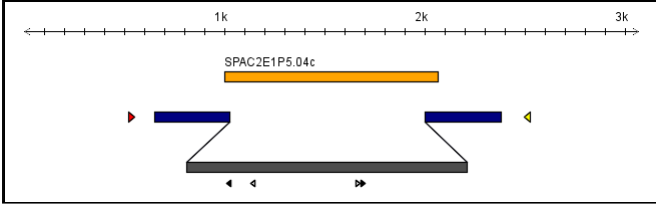

SPAC2E1P5.05

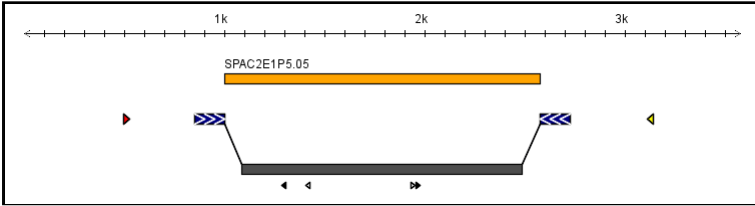

SPAC2F3.01

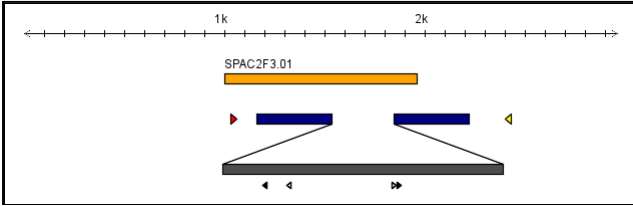

SPAC2F3.02

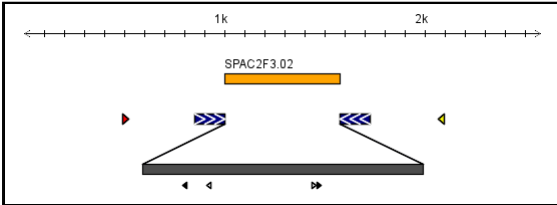

SPAC2F3.03c

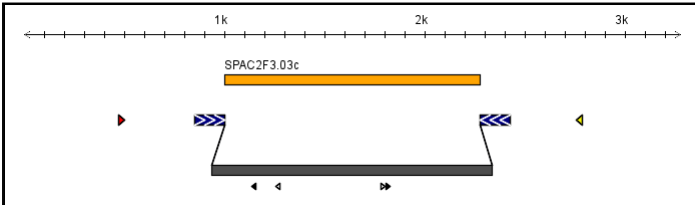

SPAC2F3.04c

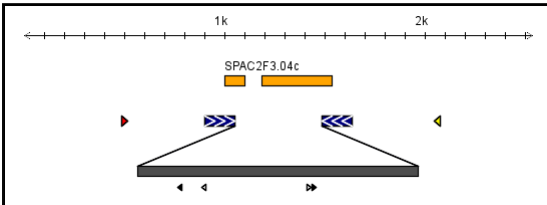

SPAC2F3.05c

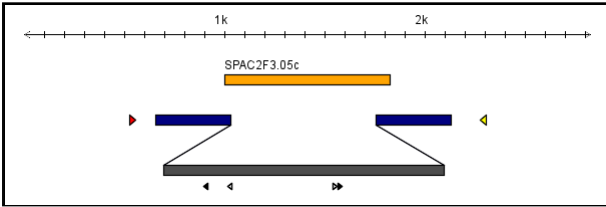

SPAC2F3.07c

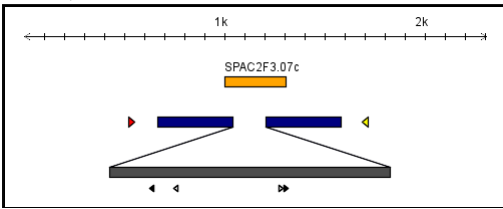

SPAC2F3.08

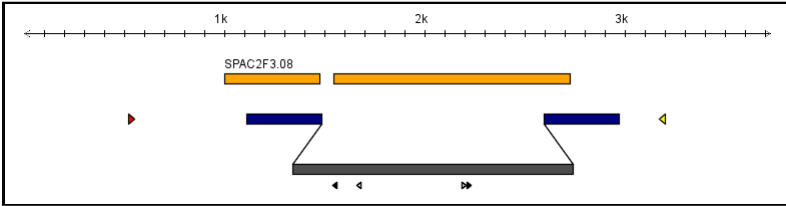

SPAC2F3.09

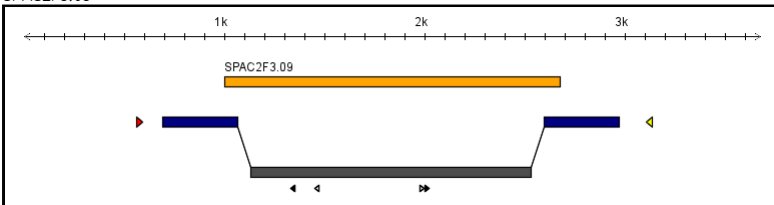

SPAC2F3.10

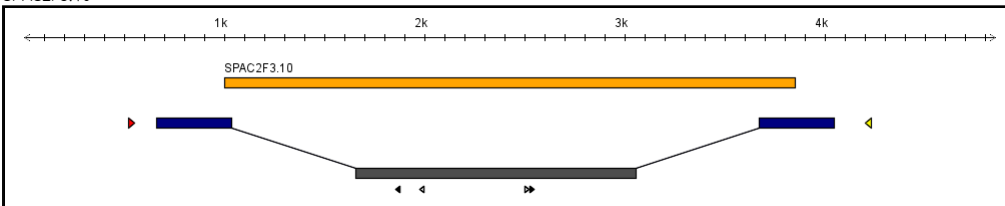

SPAC2F3.11

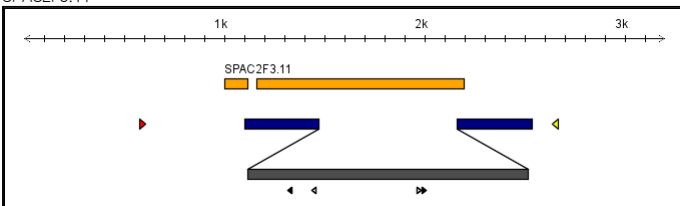

SPAC2F3.12c

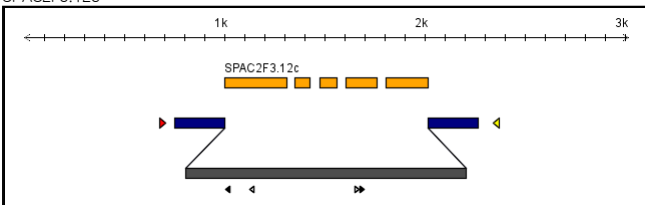

SPAC2F3.13c

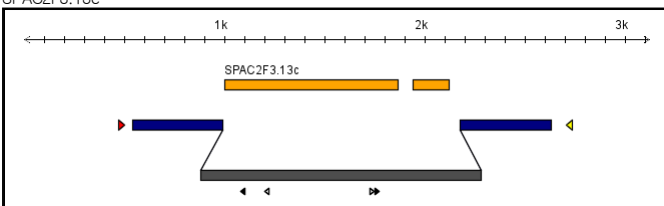

SPAC2F3.14c

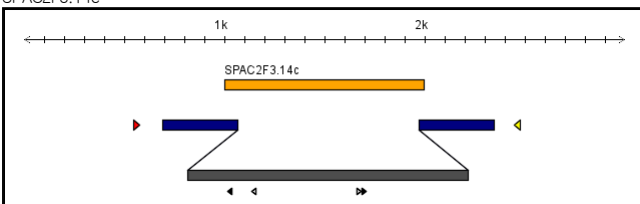



SPAC2F3.15

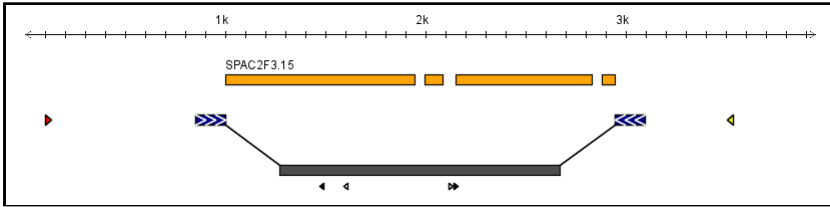

SPAC2F3.16

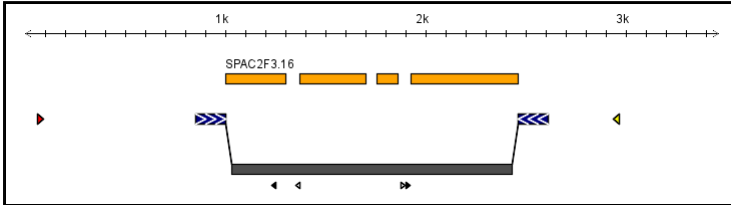

SPAC2F3.17c

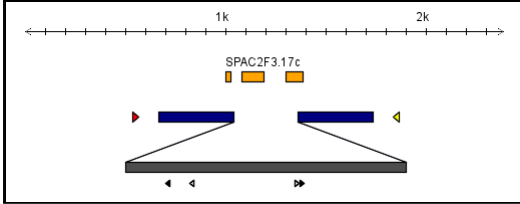

SPAC2F3.18c

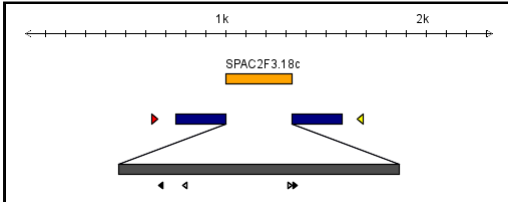

SPAC2F7.02c

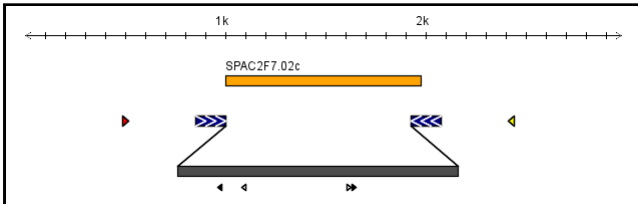

SPAC2F7.03c

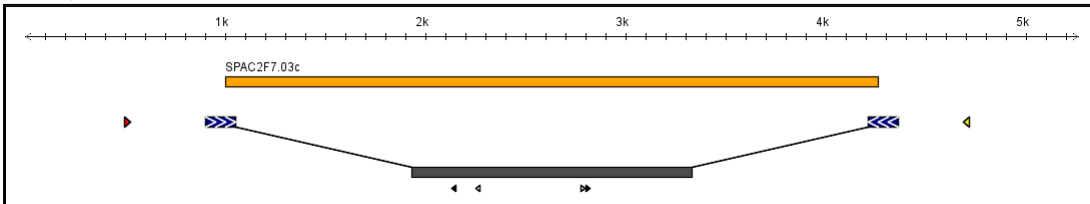

SPAC2F7.04

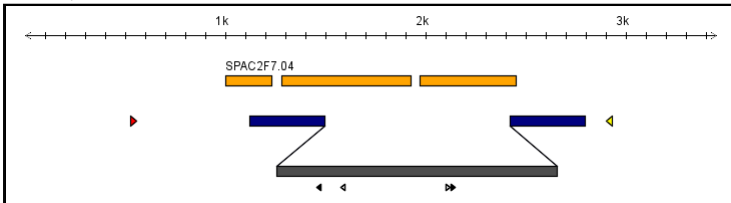

SPAC2F7.05c

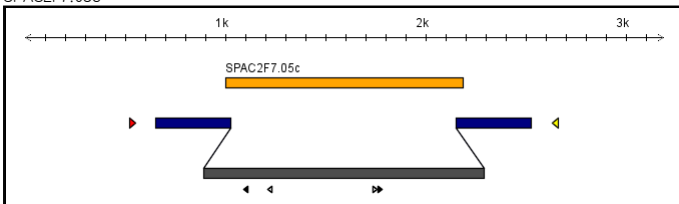

SPAC2F7.06c

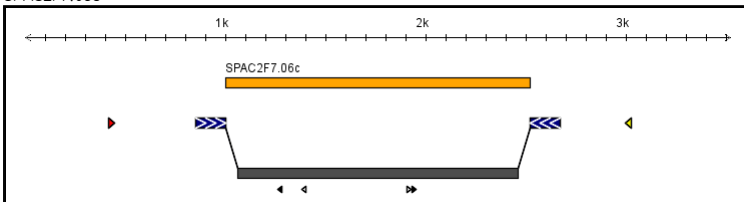

SPAC2F7.07c

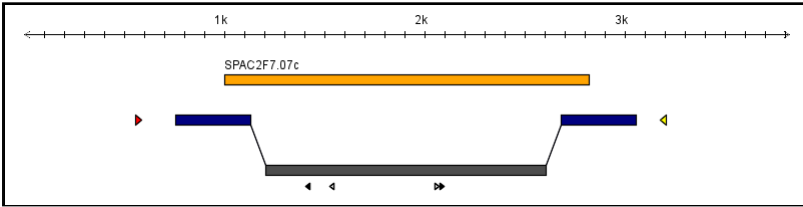

SPAC2F7.08c

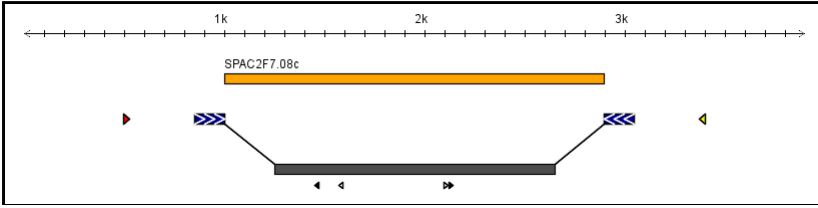

SPAC2F7.09c

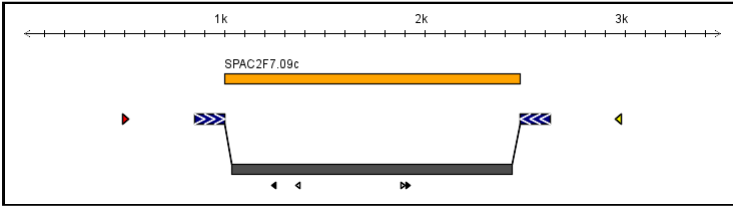

SPAC2F7.10

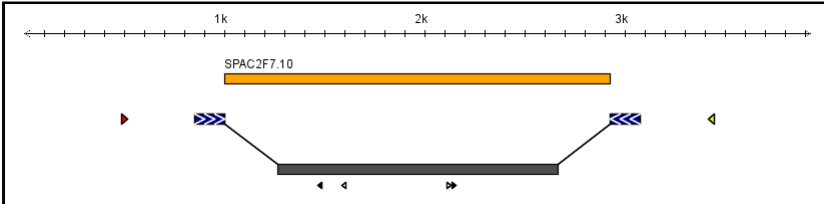

SPAC2F7.11

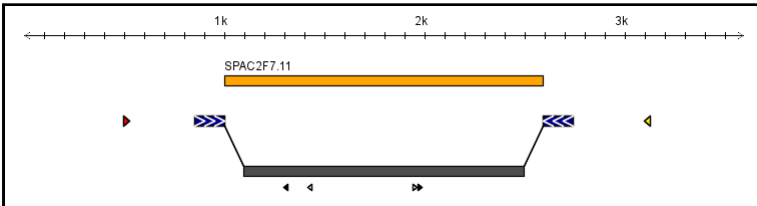

SPAC2F7.13c

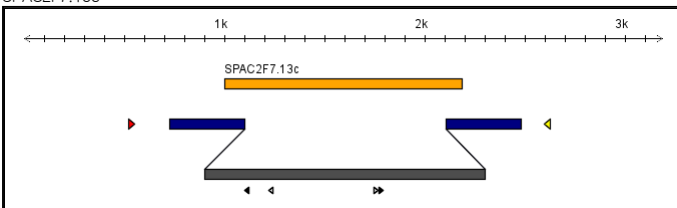

SPAC2F7.14c

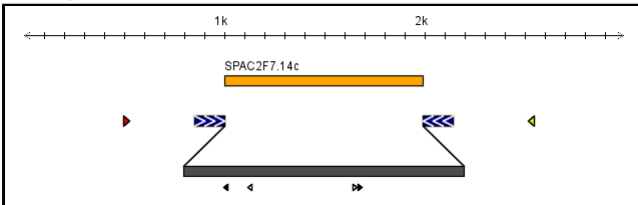

SPAC2F7.15

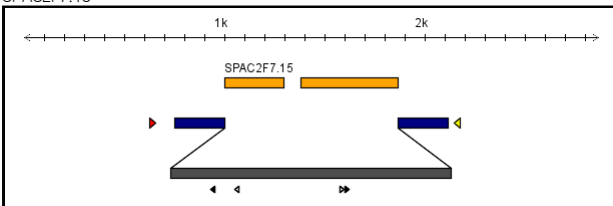

SPAC2F7.17

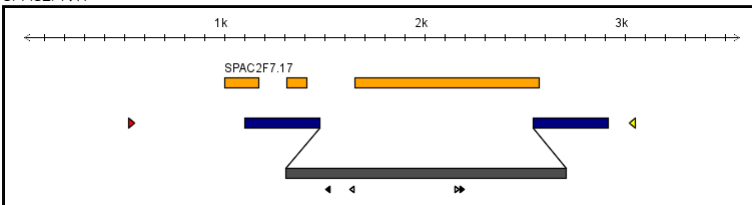

SPAC2G11.03c

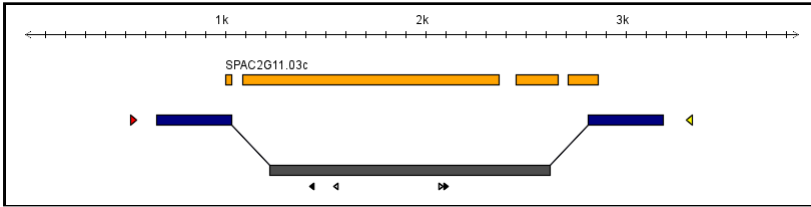

SPAC2G11.04

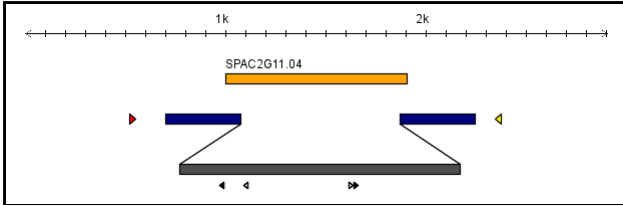

SPAC2G11.05c

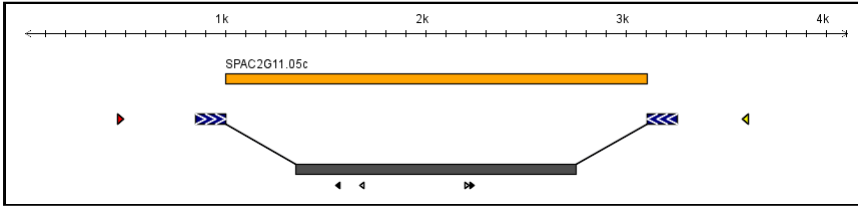

SPAC2G11.06

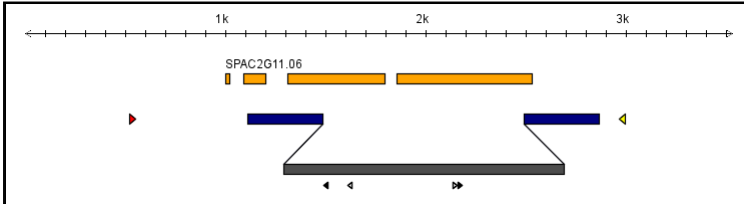

SPAC2G11.07c

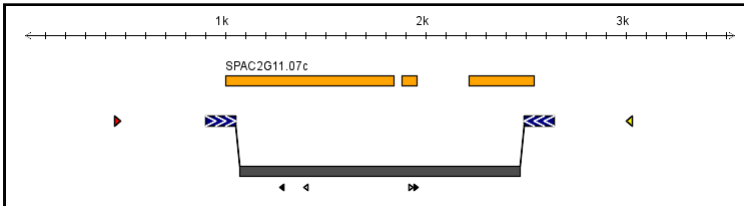

SPAC2G11.08c

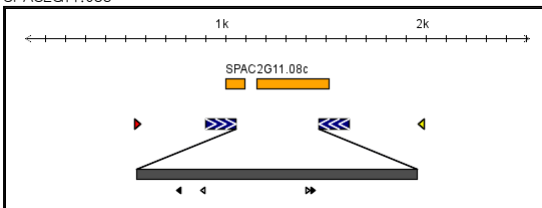

SPAC2G11.09

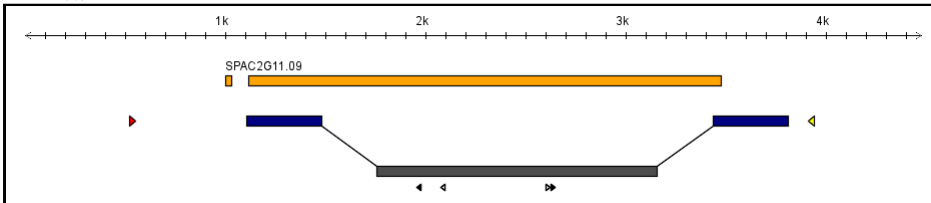

SPAC2G11.10c

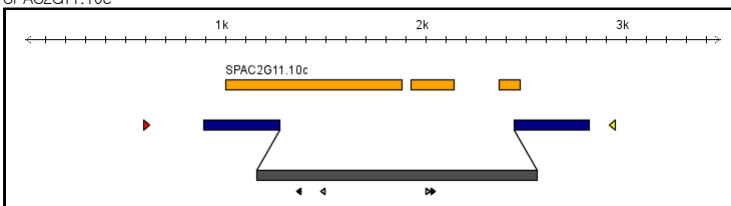

SPAC2G11.11c

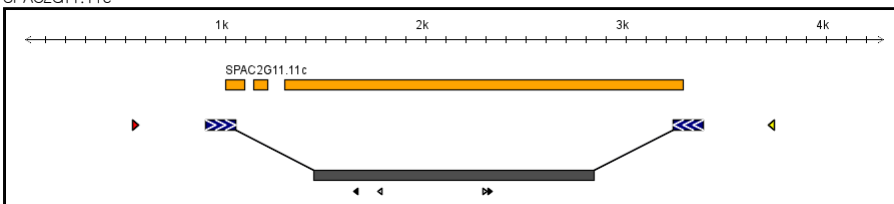

SPAC2G11.13

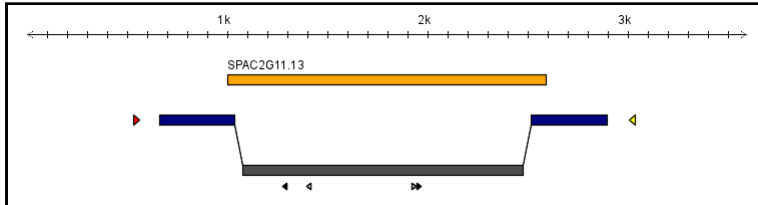

SPAC2G11.14

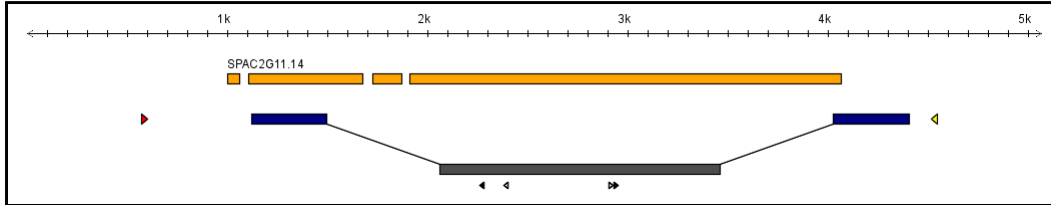

SPAC2H10.01

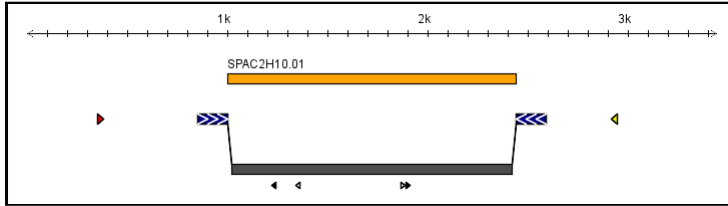

SPAC2H10.02c

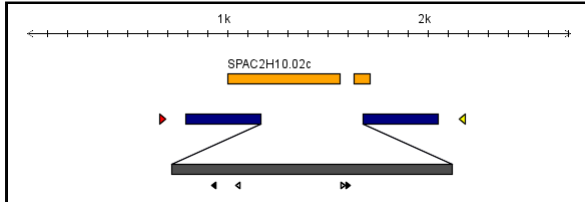

SPAC3A11.02

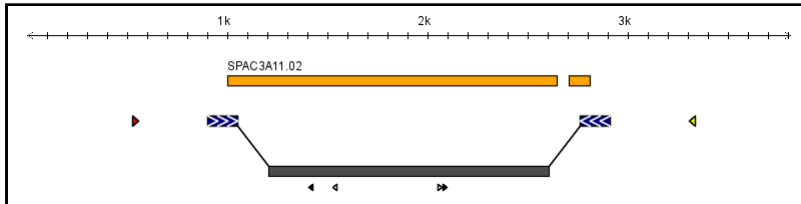

SPAC3A11.03

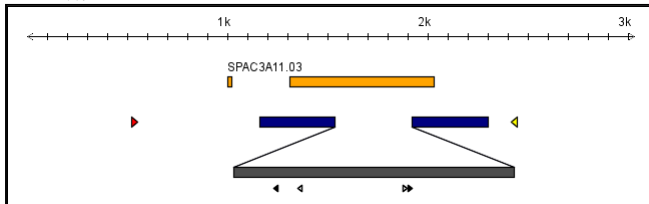

SPAC3A11.04

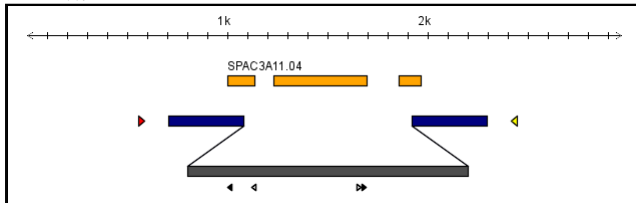

SPAC3A11.05c

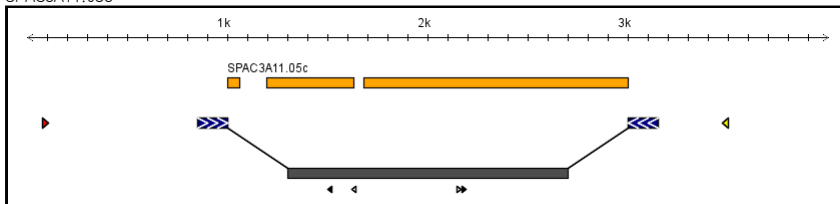

SPAC3A11.06

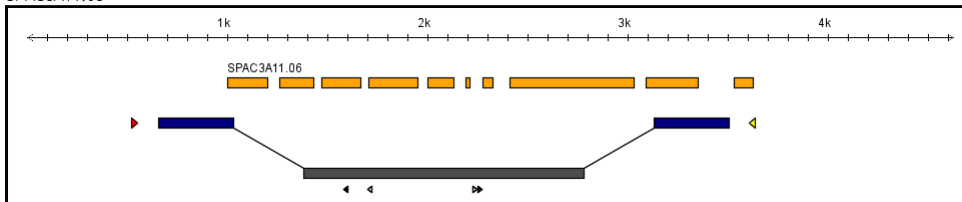

SPAC3A11.07

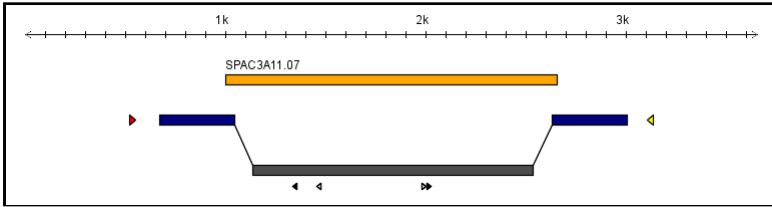

SPAC3A11.08

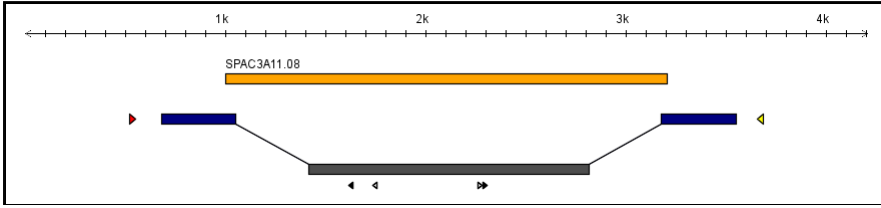

SPAC3A11.09

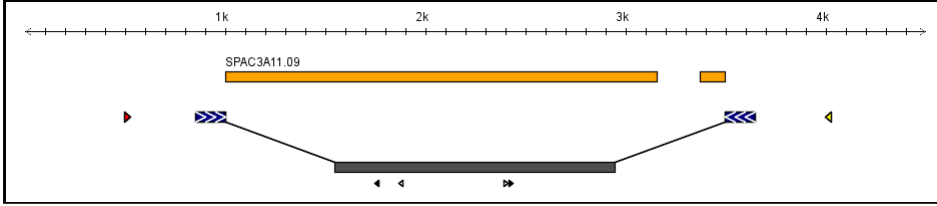

SPAC3A11.10c

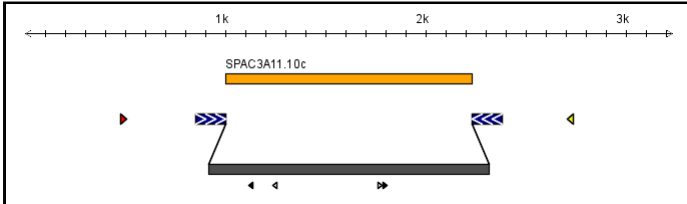

SPAC3A11.11c

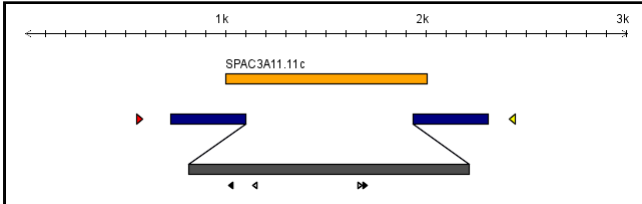

SPAC3A11.12C

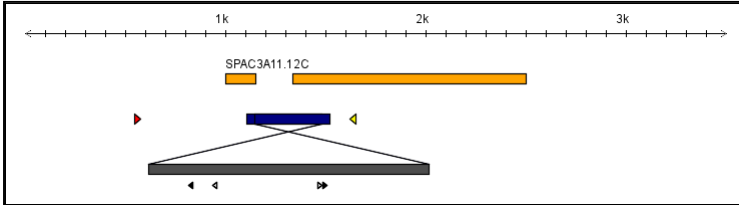

SPAC3A11.13

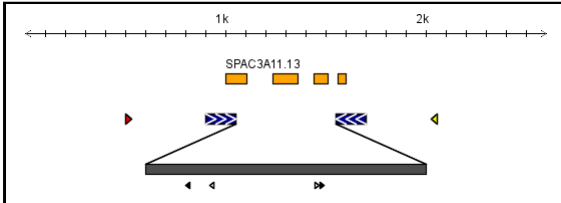

SPAC3A11.14c

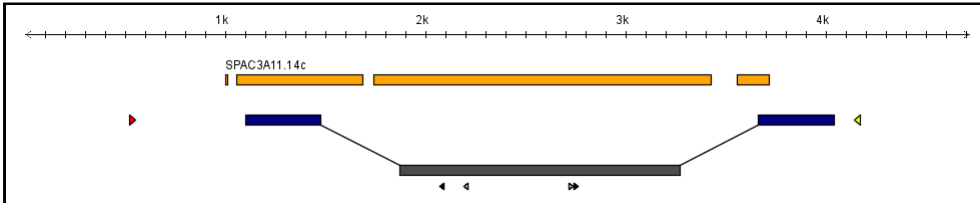

SPAC3A12.02

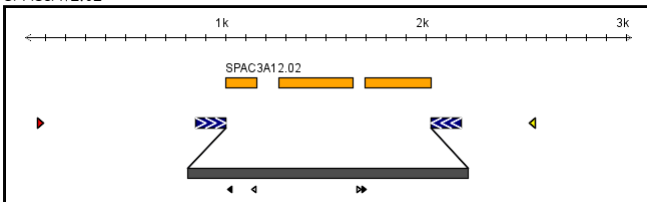

SPAC3A12.03c

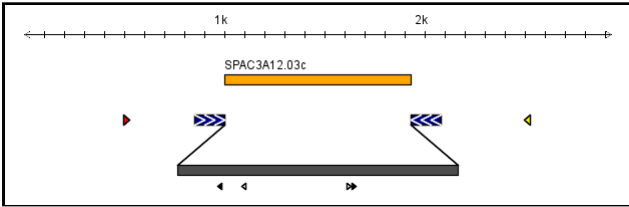

SPAC3A12.04c

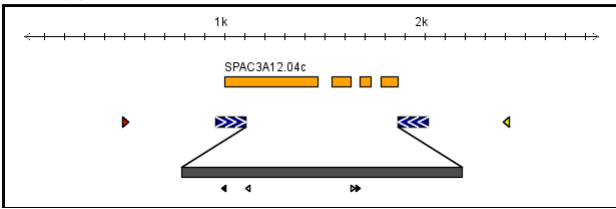

SPAC3A12.06c

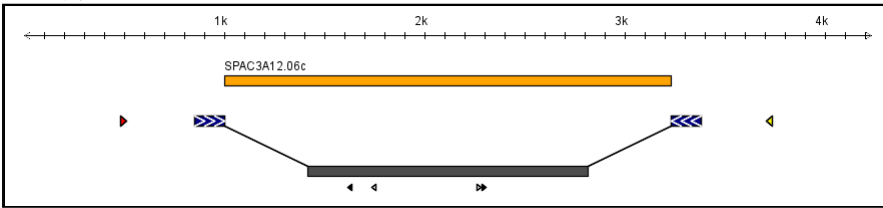

SPAC3A12.07

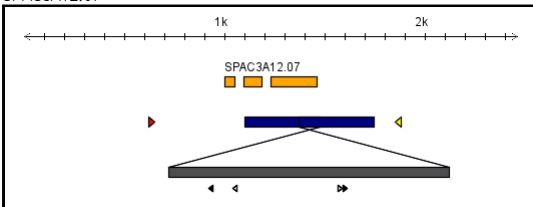

SPAC3A12.08

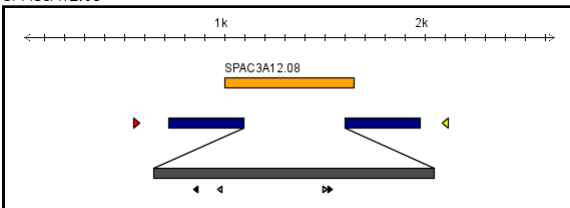

SPAC3A12.09c

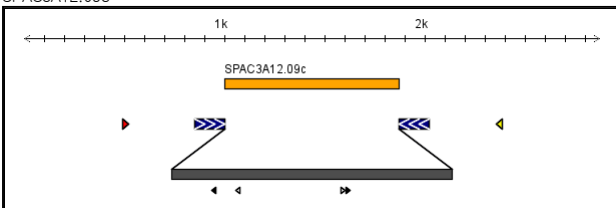

SPAC3A12.10

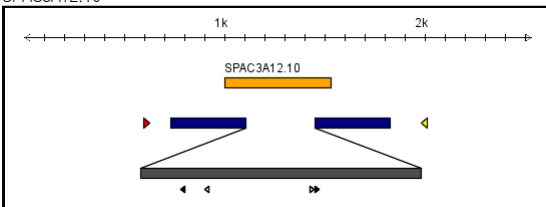

SPAC3A12.11c

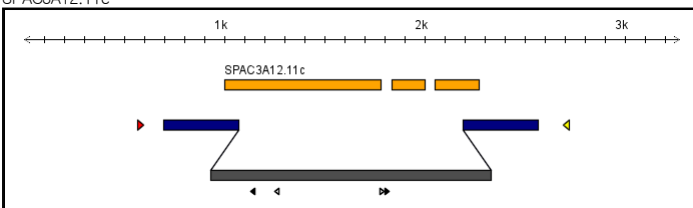

SPAC3A12.12

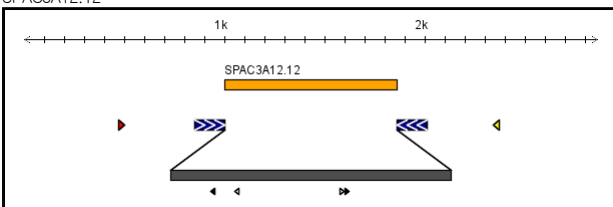

SPAC3A12.13c

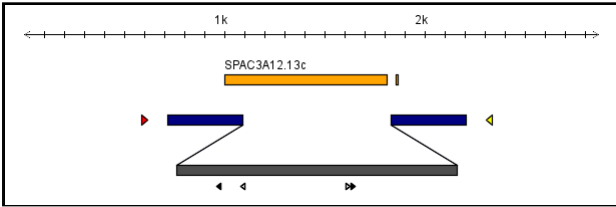

SPAC3A12.14

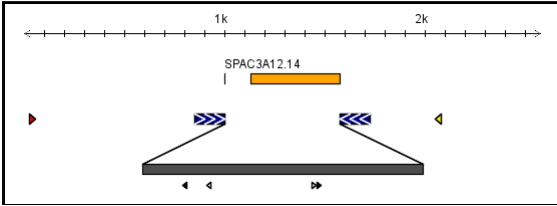

SPAC3A12.15

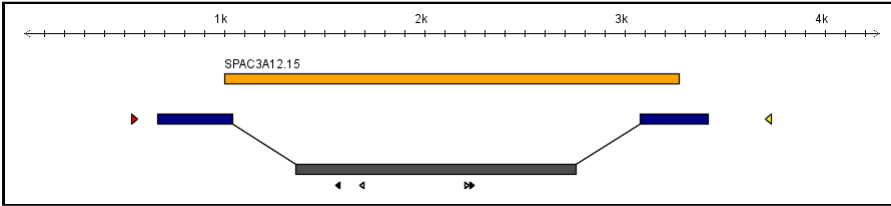

SPAC3A12.16c

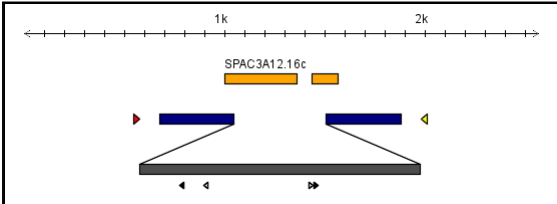

SPAC3A12.17c

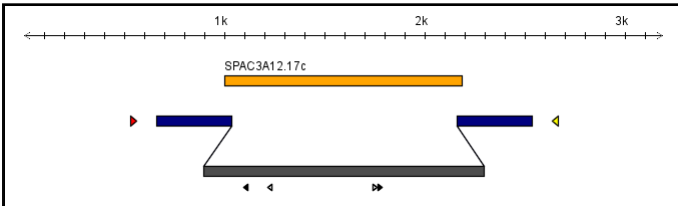

SPAC3A12.18

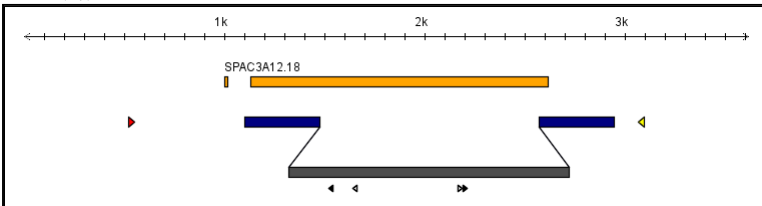

SPAC3A12.19

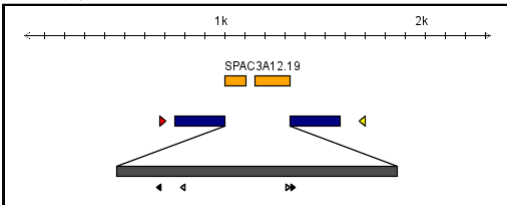

SPAC3C7.01c

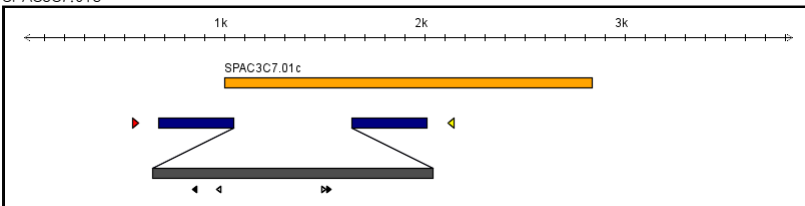

SPAC3C7.02c

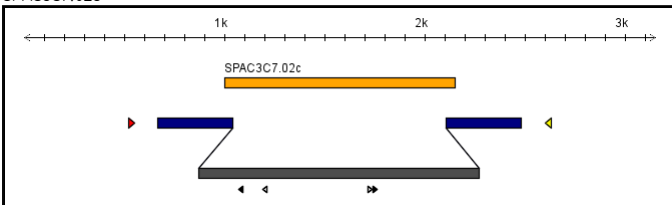

SPAC3C7.03c

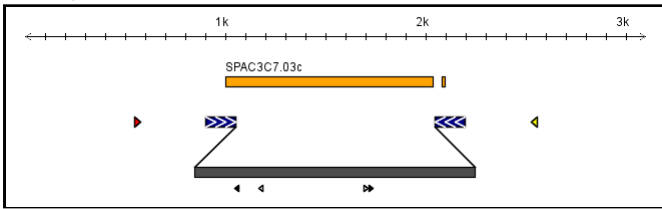

SPAC3C7.04

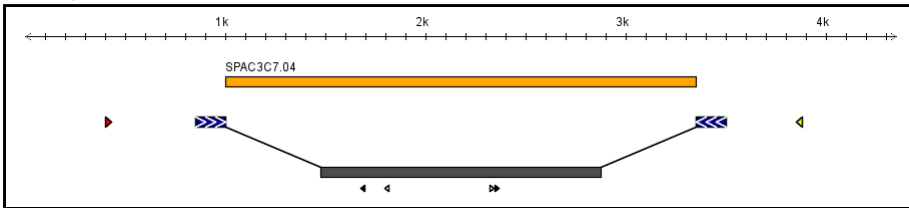

SPAC3C7.05c

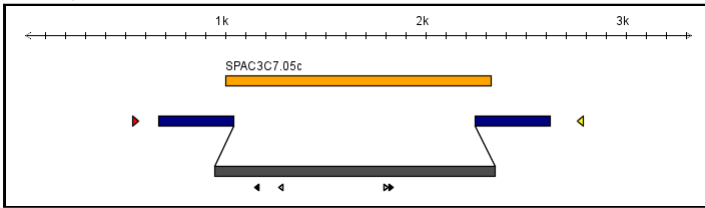

SPAC3C7.06c

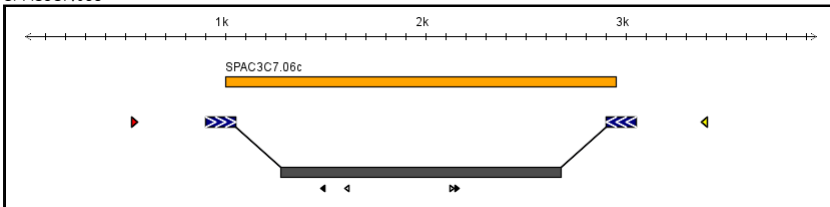

SPAC3C7.07c

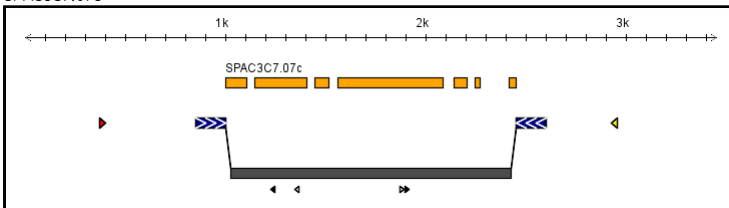

SPAC3C7.09

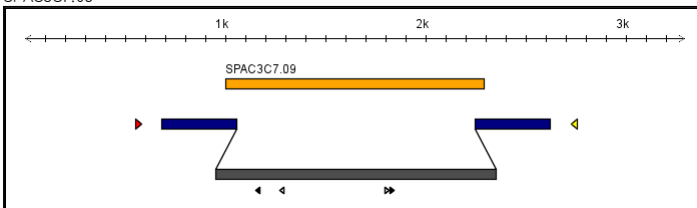

SPAC3C7.10

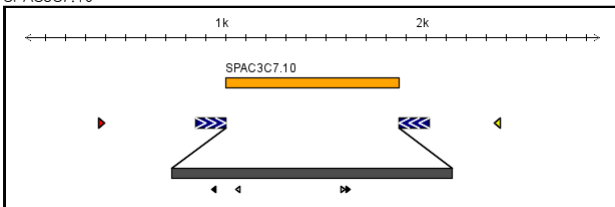

SPAC3C7.11c

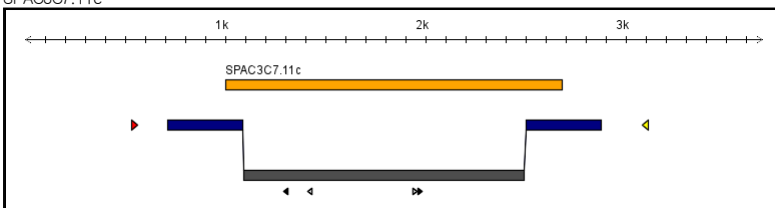

SPAC3C7.12

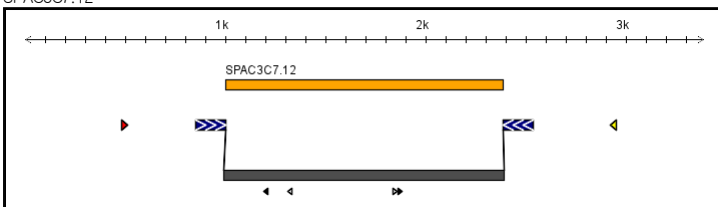



SPAC3C7.13c

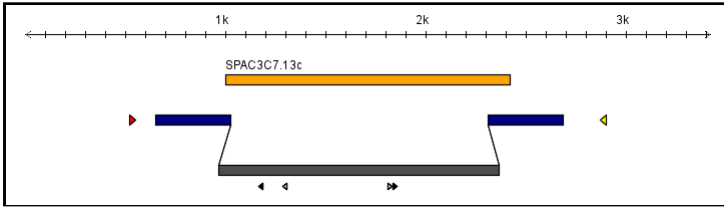

SPAC3C7.14c

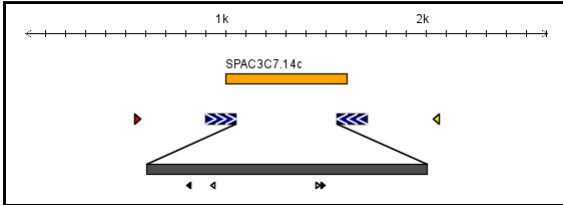

SPAC3F10.03

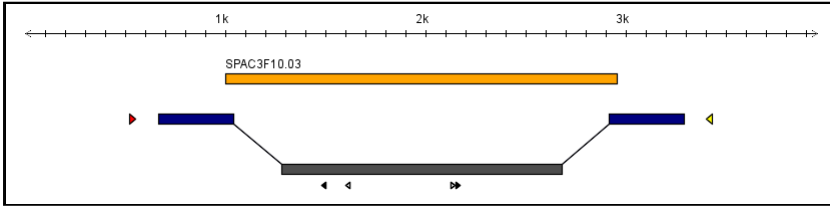

SPAC3F10.04

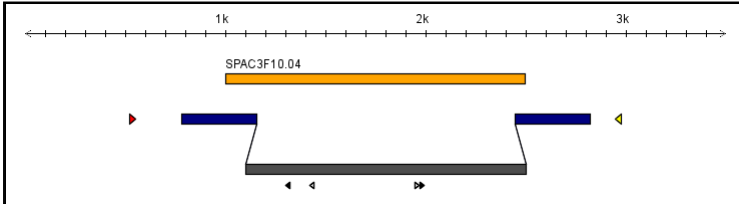

SPAC3F10.05c

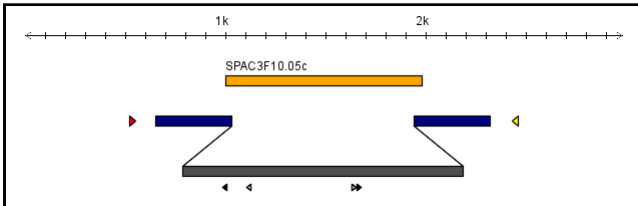

SPAC3F10.06c

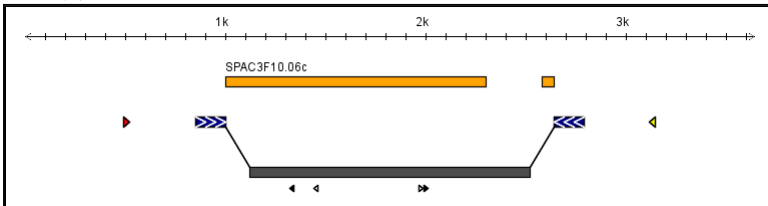

SPAC3F10.08c

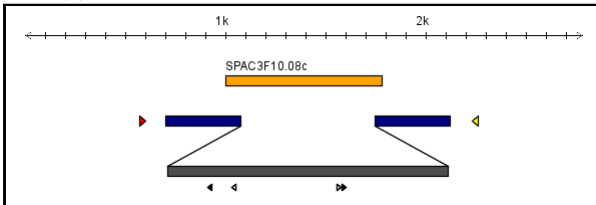

SPAC3F10.09

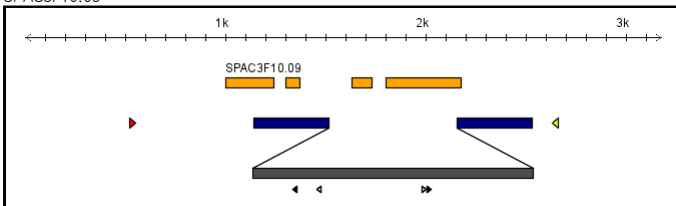

SPAC3F10.10c

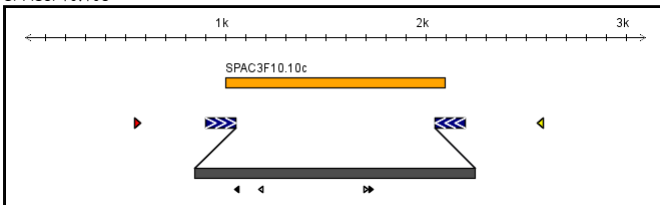

SPAC3F10.12c

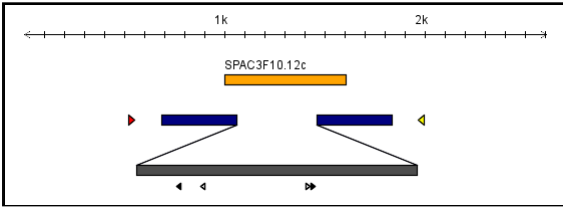

SPAC3F10.13

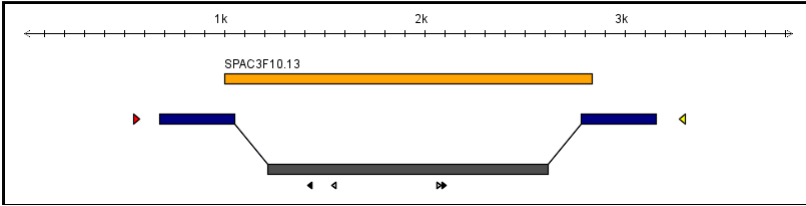

SPAC3F10.15c

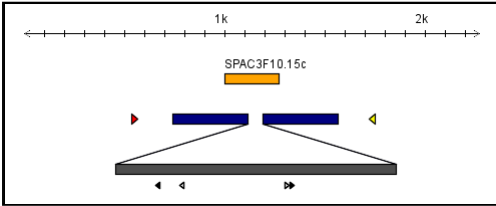

SPAC3F10.16c

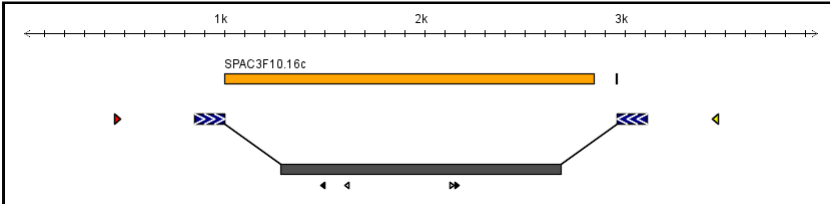

SPAC3F10.17

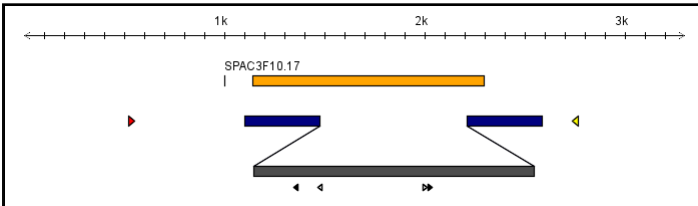

SPAC3F10.18c

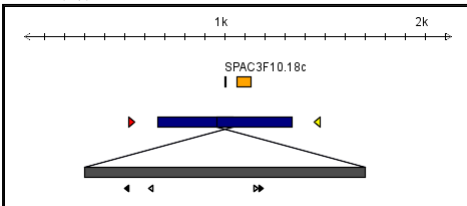

SPAC3G6.02

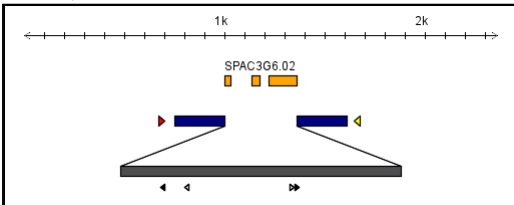

SPAC3G6.03c

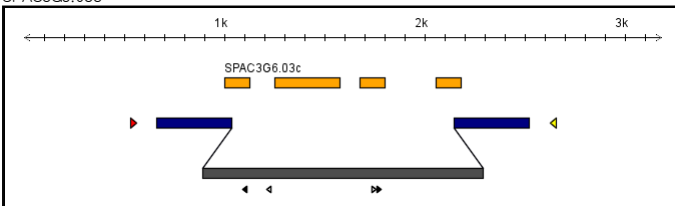

SPAC3G6.04

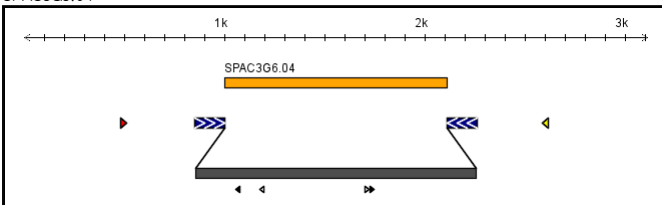

SPAC3G6.05

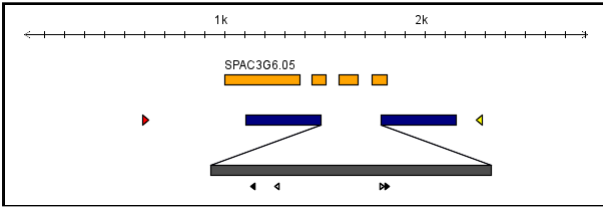

SPAC3G6.06c

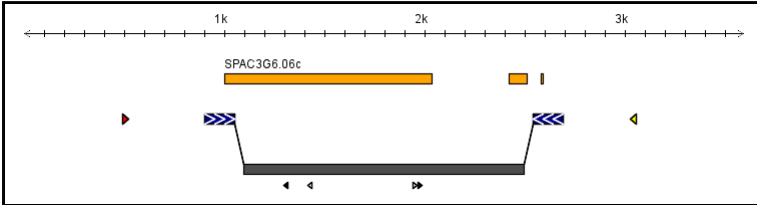

SPAC3G6.08

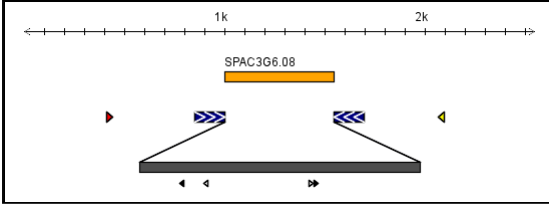

SPAC3G6.09c

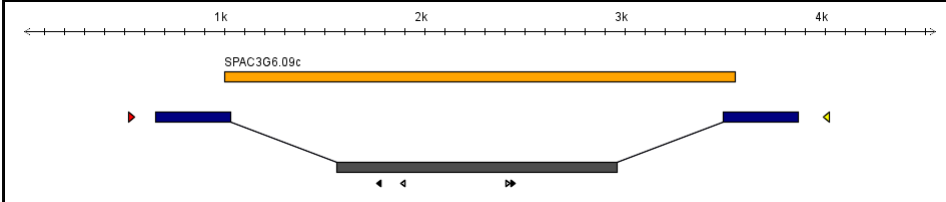

SPAC3G6.10c

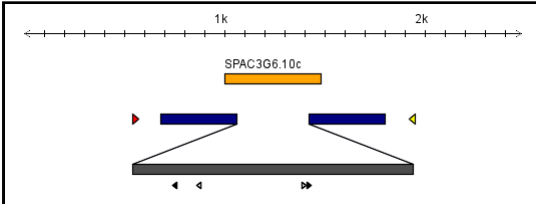

SPAC3G6.13c

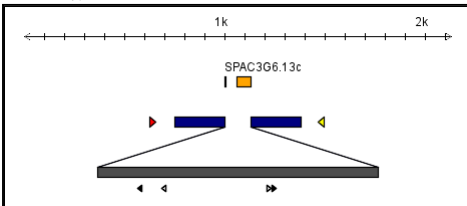

SPAC3G9.01

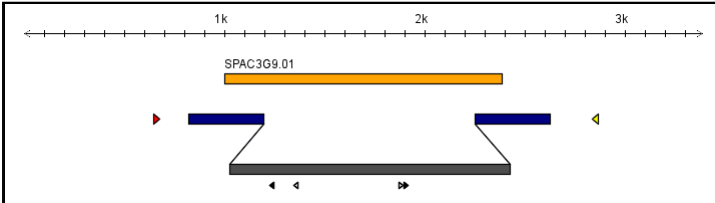

SPAC3G9.02

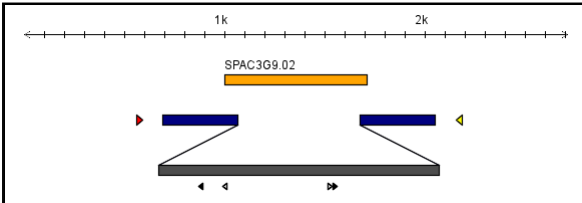

SPAC3G9.04

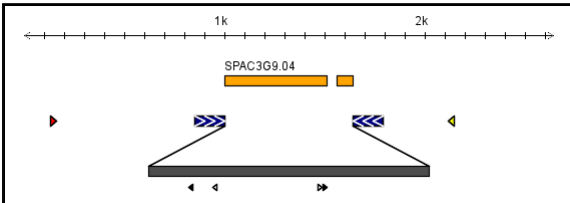

SPAC3G9.05

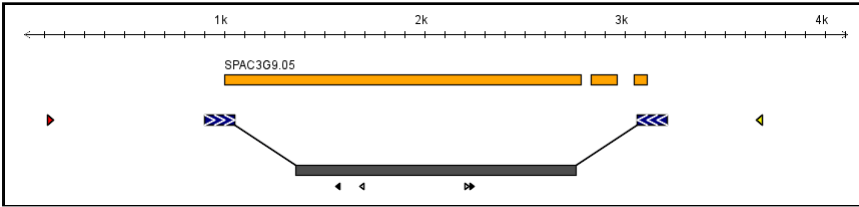

SPAC3G9.06

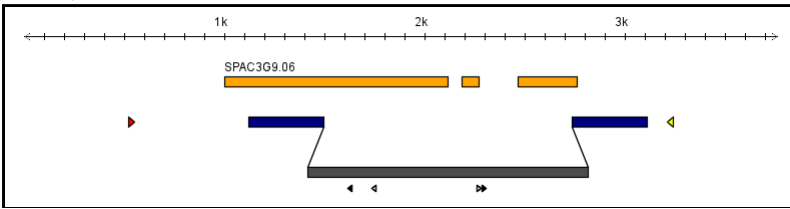

SPAC3G9.07c

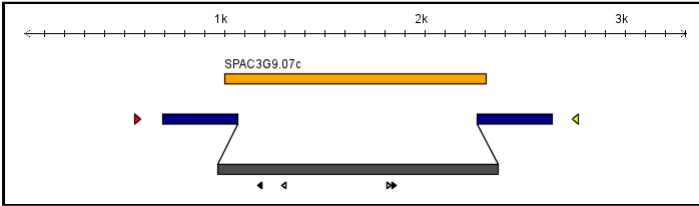

SPAC3G9.08

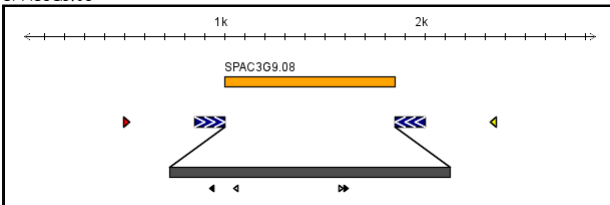

SPAC3G9.09c

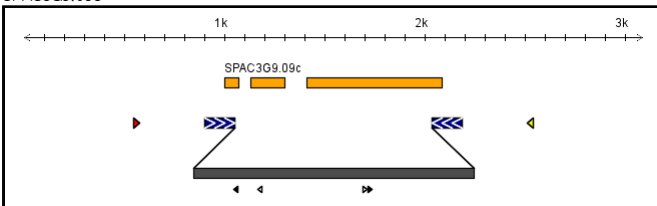

SPAC3G9.10c

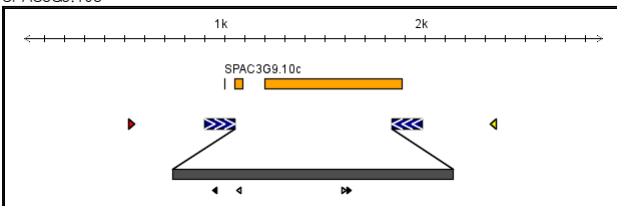

SPAC3G9.11c

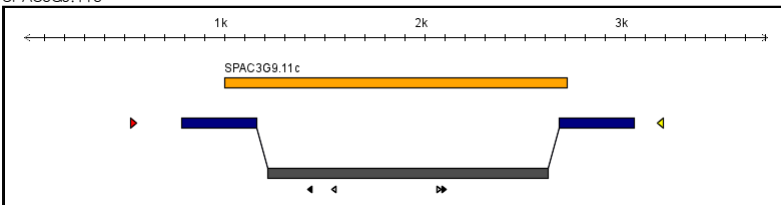

SPAC3G9.13c

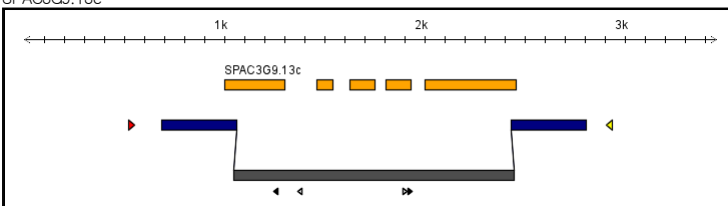

SPAC3G9.14

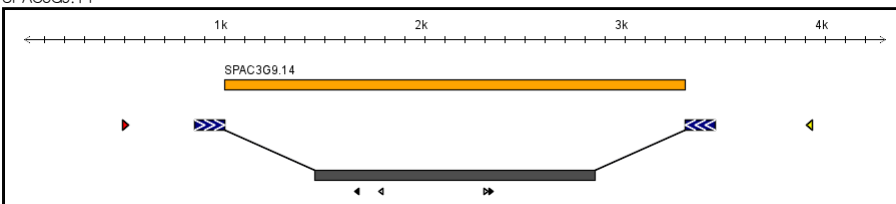

SPAC3G9.15c

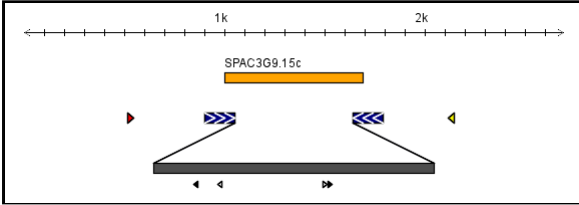

SPAC3G9.16c

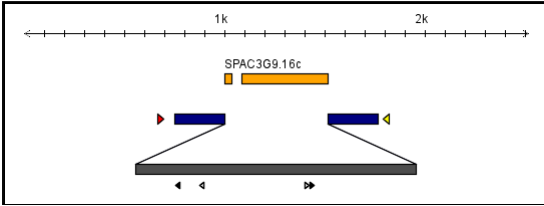

SPAC3H1.01c

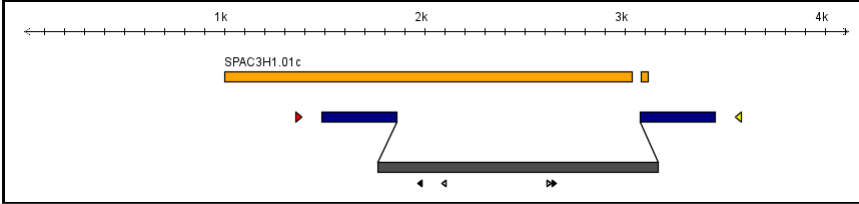

SPAC3H1.03

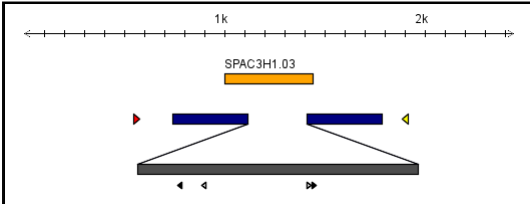

SPAC3H1.04c

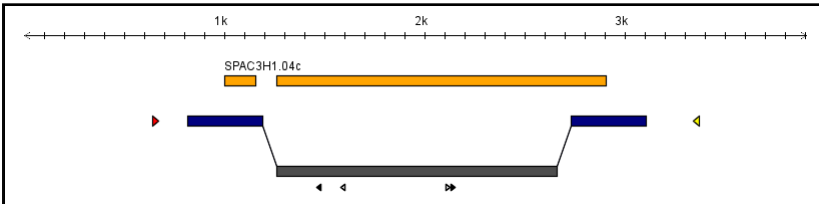

SPAC3H1.05

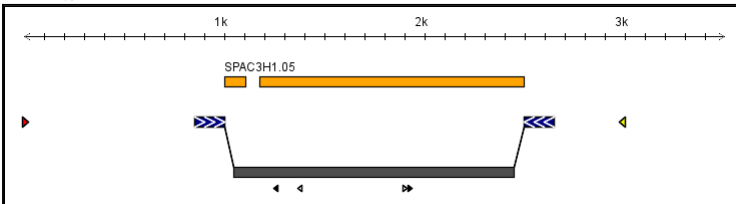

SPAC3H1.06c

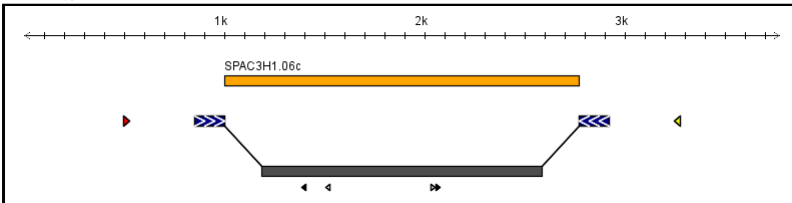

SPAC3H1.07

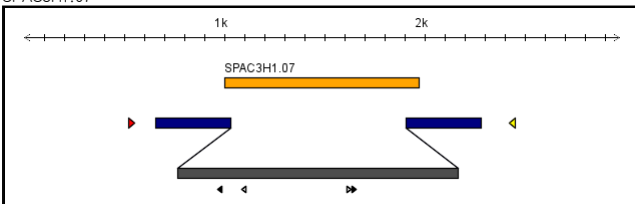

SPAC3H1.08c

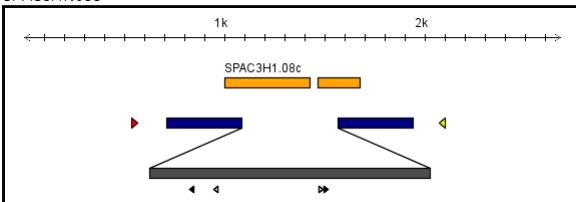

SPAC3H1.09c

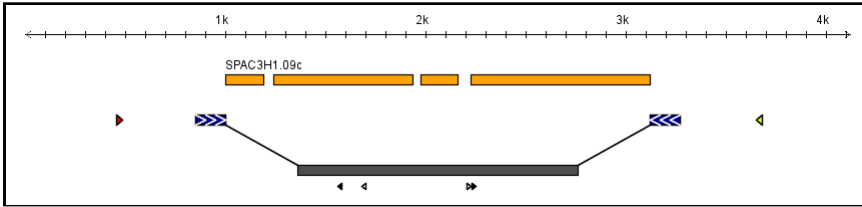

SPAC3H1.10

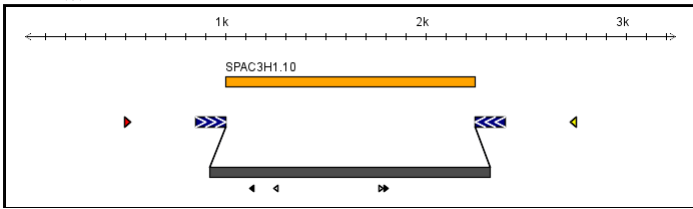

SPAC3H1.11

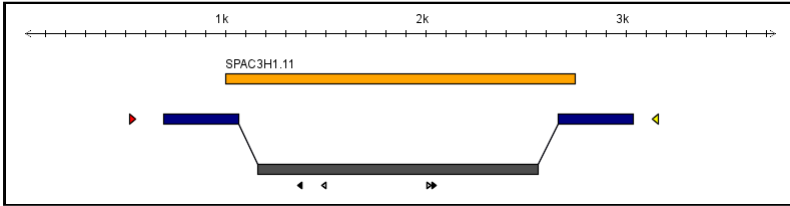

SPAC3H1.13

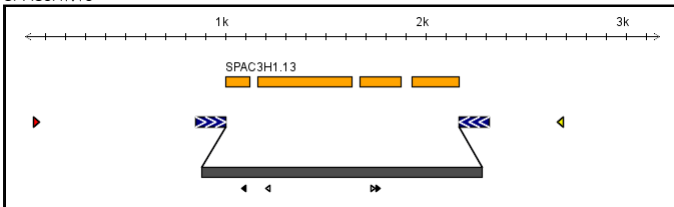

SPAC3H1.14

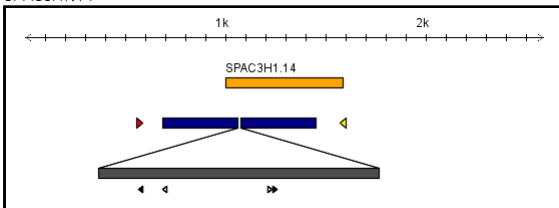

SPAC3H5.04

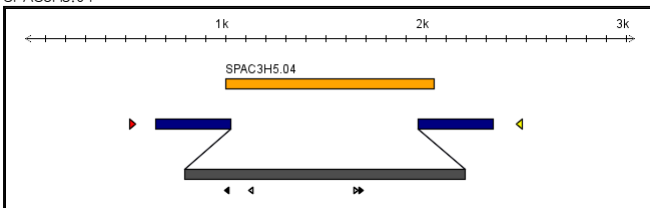

SPAC3H5.05c

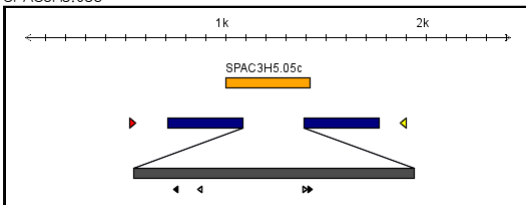

SPAC3H5.07

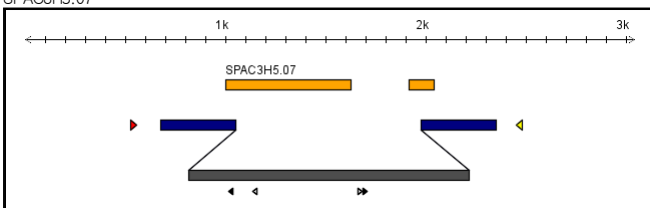

SPAC3H5.08c

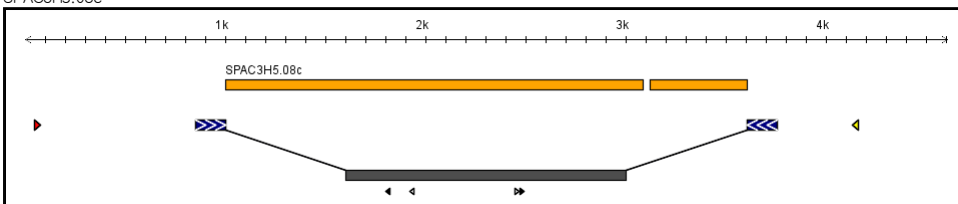

SPAC3H5.10

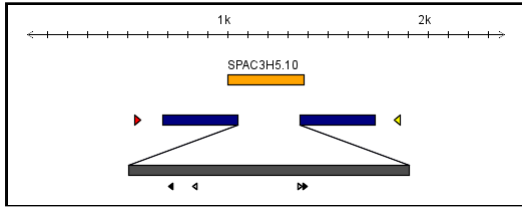

SPAC3H5.11

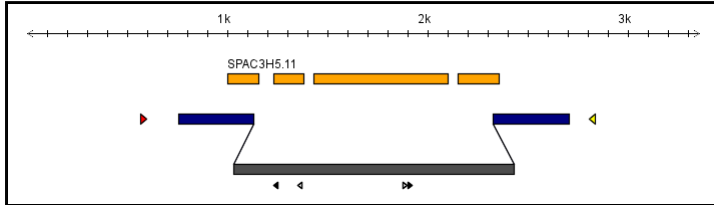

SPAC3H5.12c

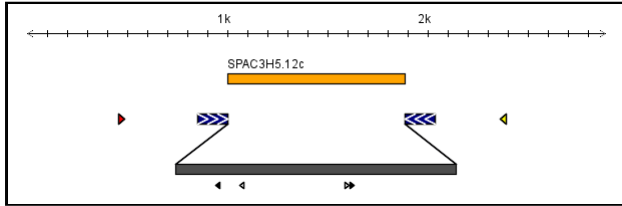

SPAC3H8.02

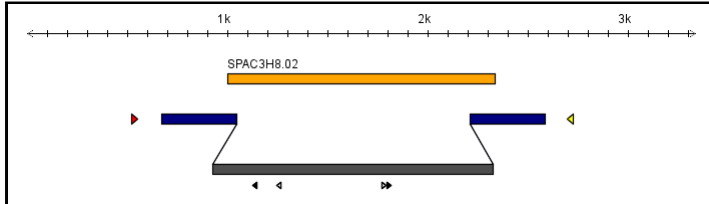

SPAC3H8.03

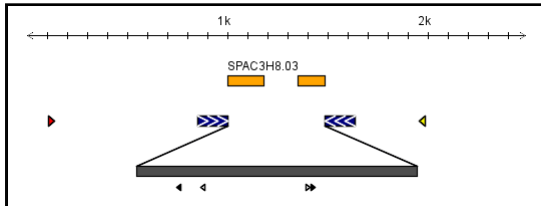

SPAC3H8.04

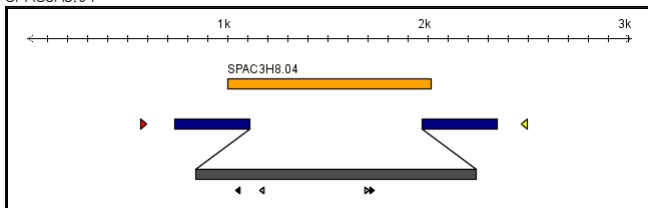

SPAC3H8.06

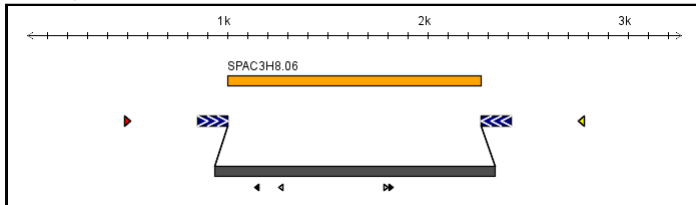

SPAC3H8.07c

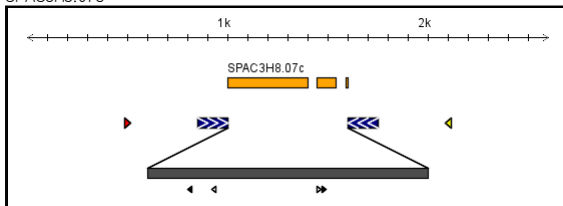

SPAC3H8.08c

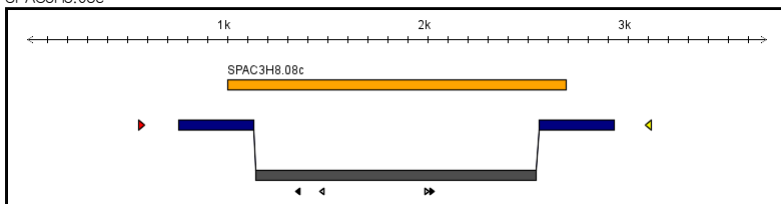

SPAC3H8.09c

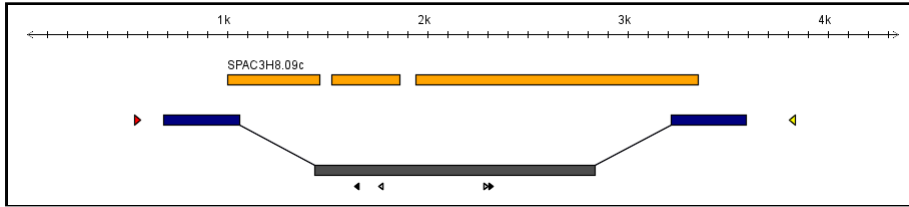

SPAC3H8.10

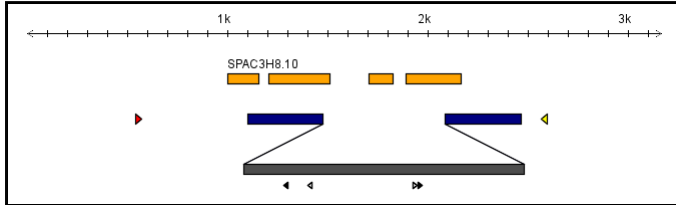

SPAC4A8.02c

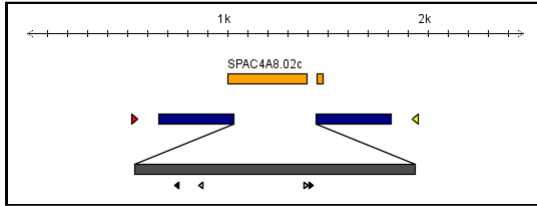

SPAC4A8.03c

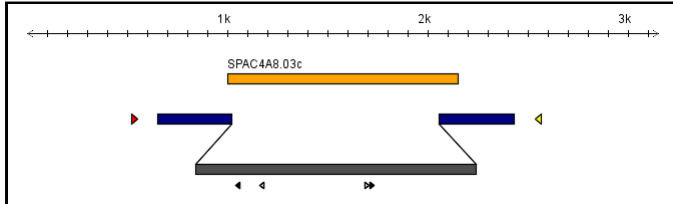

SPAC4A8.04

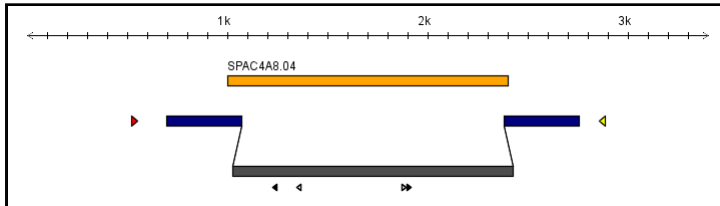

SPAC4A8.06c

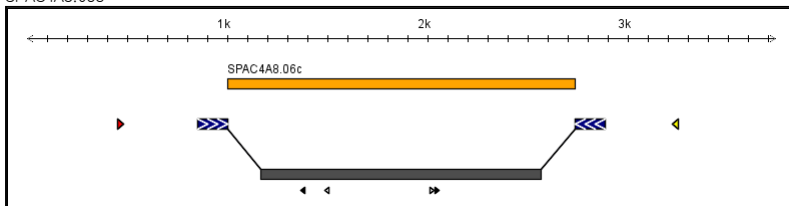

SPAC4A8.07c

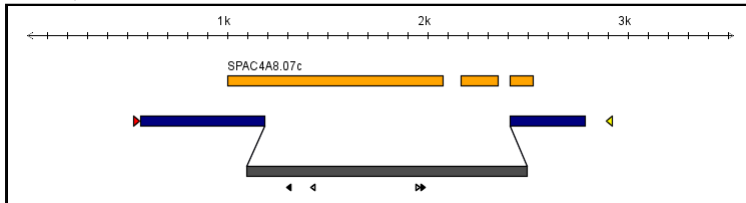

SPAC4A8.09c

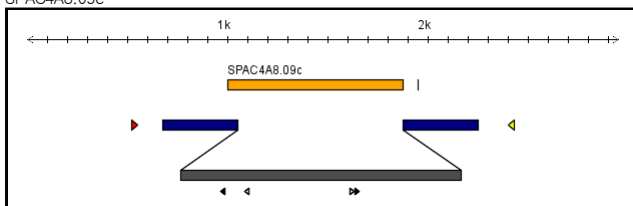

SPAC4A8.10

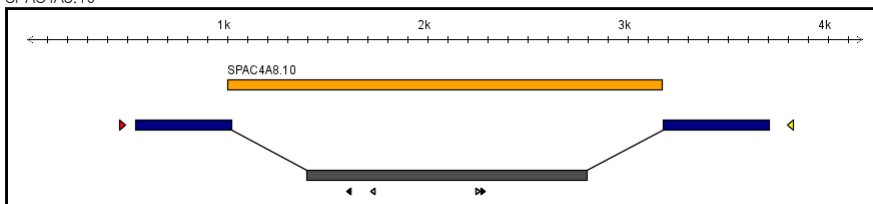



SPAC4A8.12c

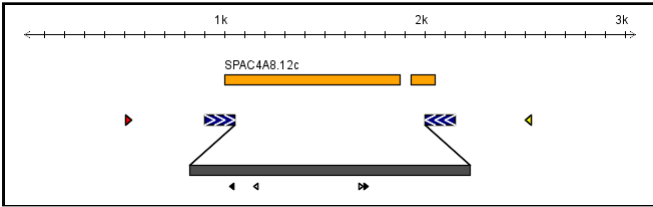

SPAC4A8.13c

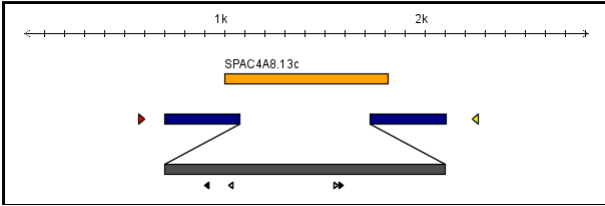

SPAC4A8.14

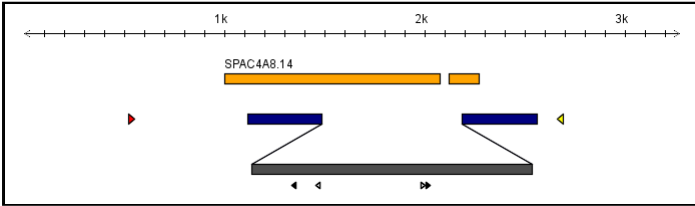

SPAC4A8.15c

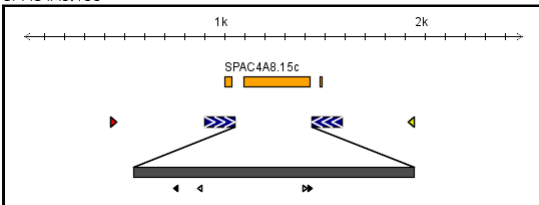

SPAC4A8.16c

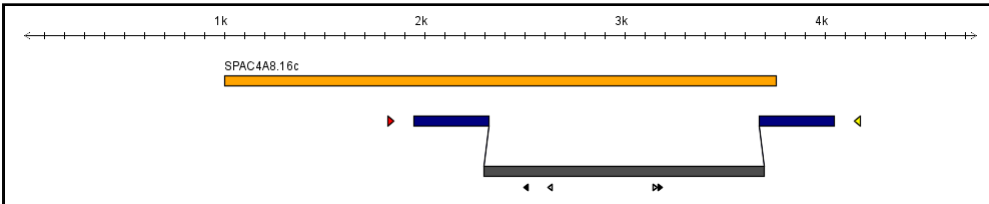

SPAC4C5.01

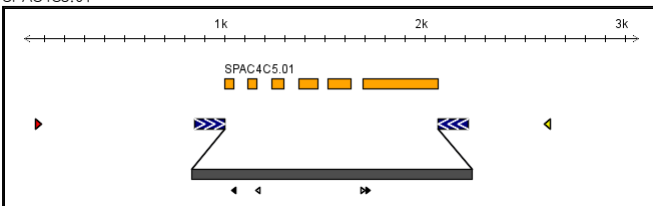

SPAC4C5.02c

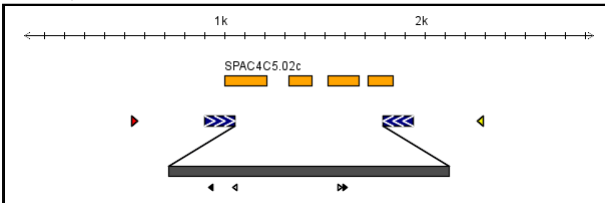

SPAC4C5.03

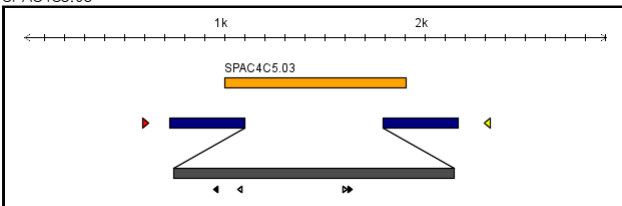

SPAC4C5.04

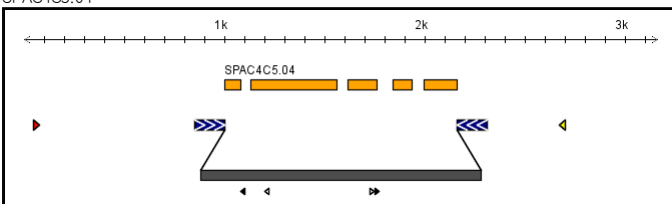

SPAC4D7.02c

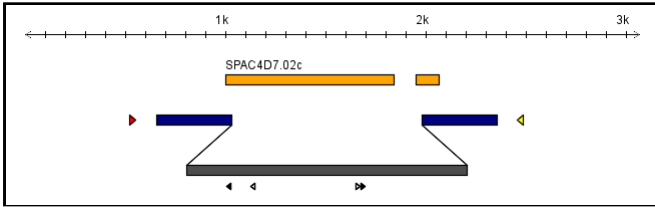

SPAC4D7.03

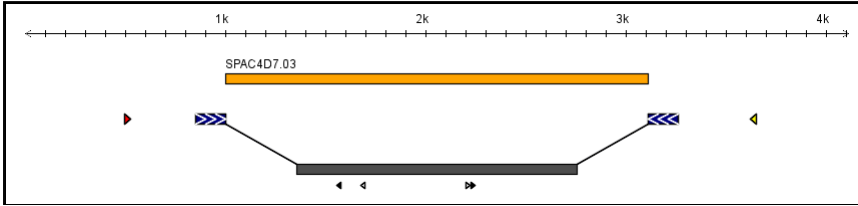

SPAC4D7.04c

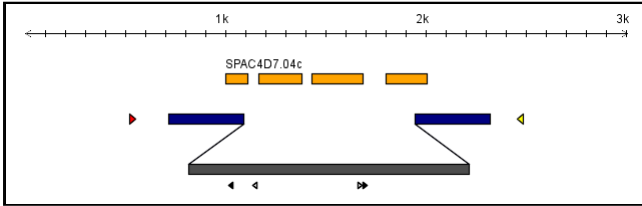

SPAC4D7.05

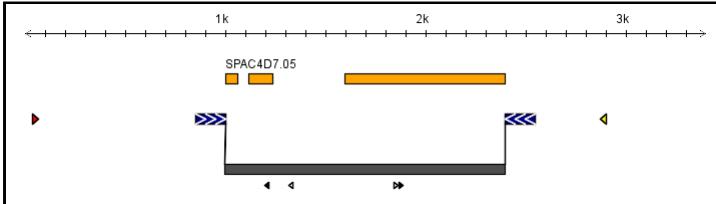

SPAC4D7.06c

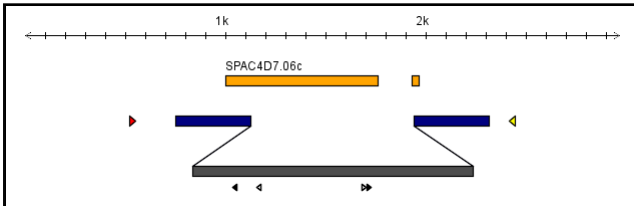

SPAC4D7.07c

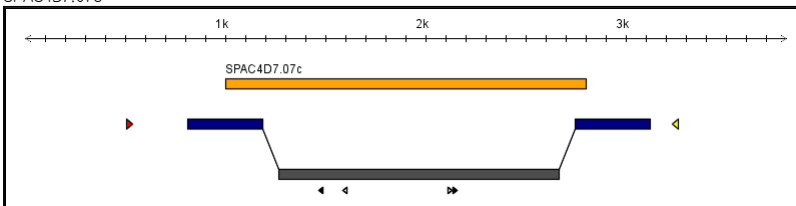

SPAC4D7.09

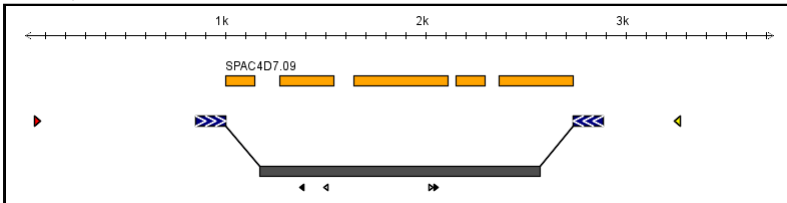

SPAC4D7.10c

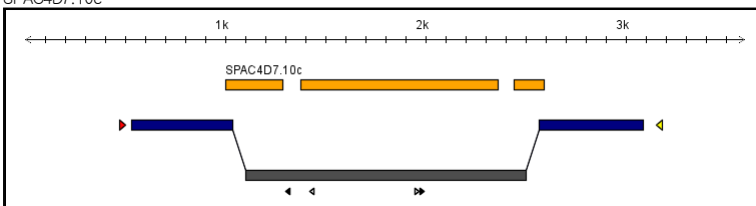

SPAC4D7.11

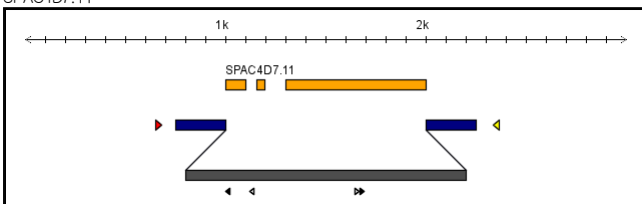

SPAC4D7.12c

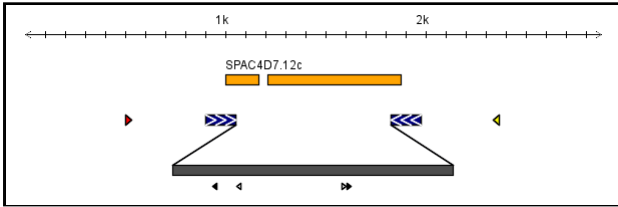

SPAC4D7.13

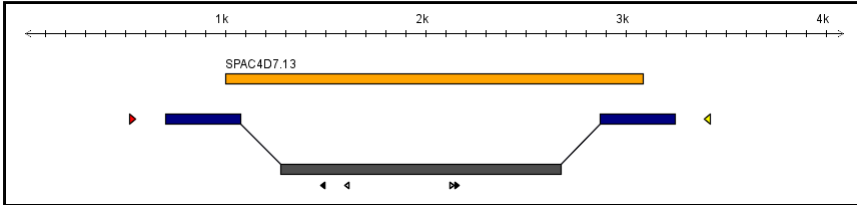

SPAC4F10.02

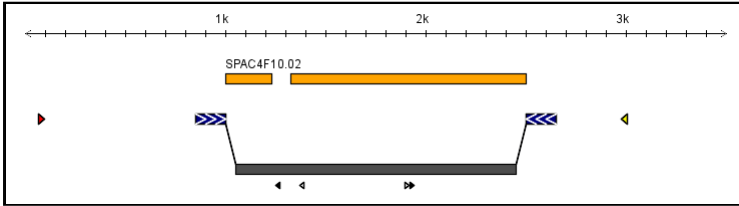

SPAC4F10.03c

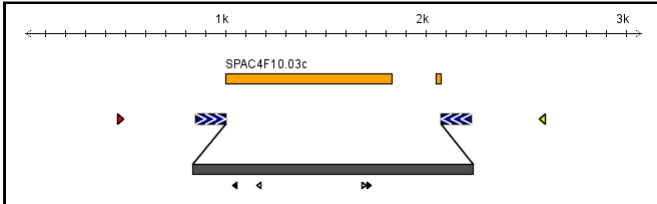

SPAC4F10.04

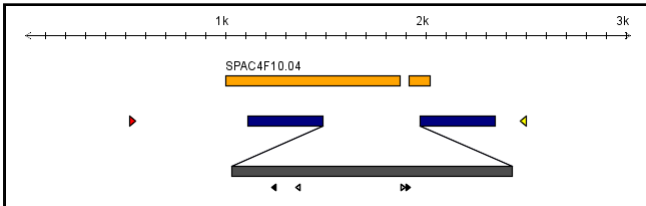

SPAC4F10.05c

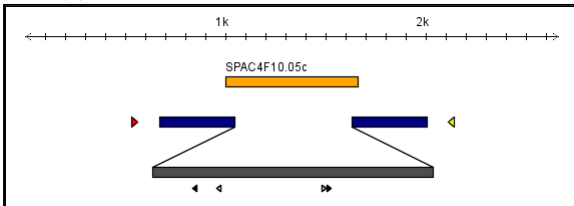

SPAC4F10.06

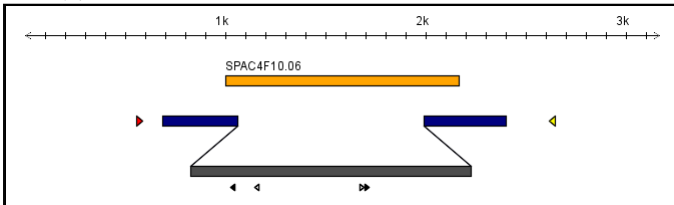

SPAC4F10.07c

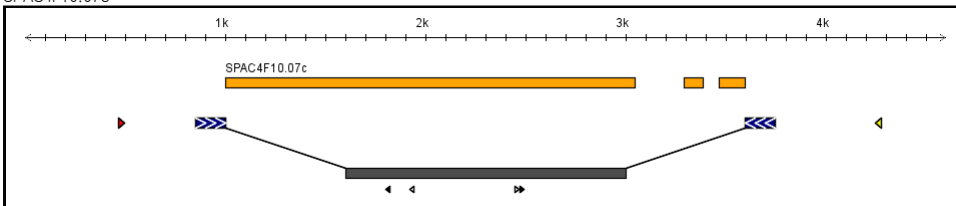

SPAC4F10.08

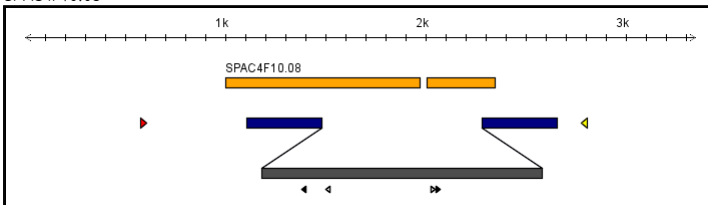

SPAC4F10.09c

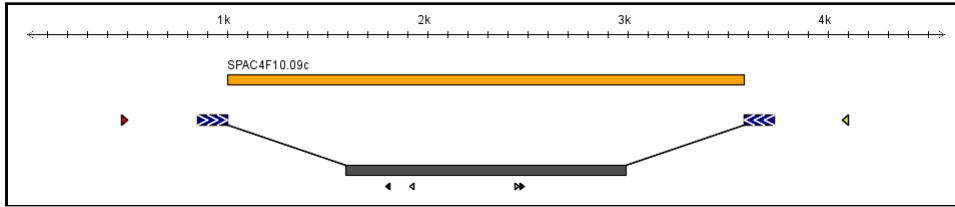

SPAC4F10.10c

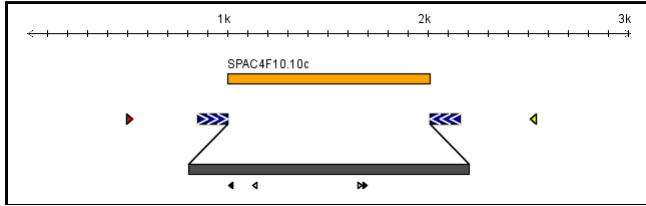

SPAC4F10.11

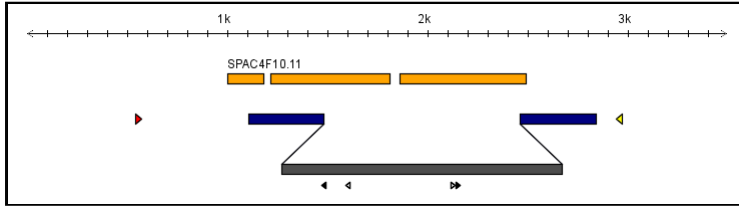

SPAC4F10.12

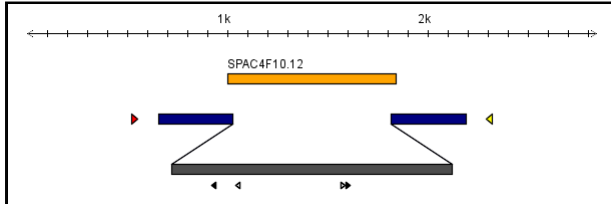

SPAC4F10.13c

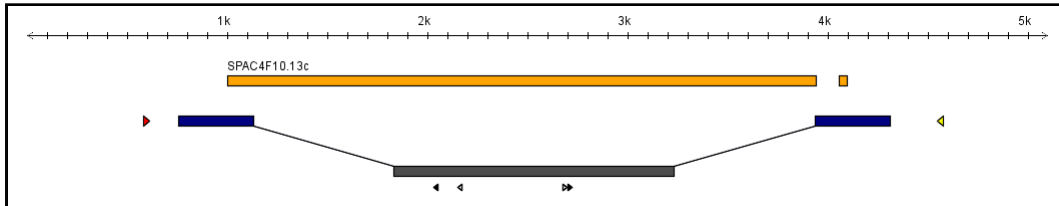

SPAC4F10.14c

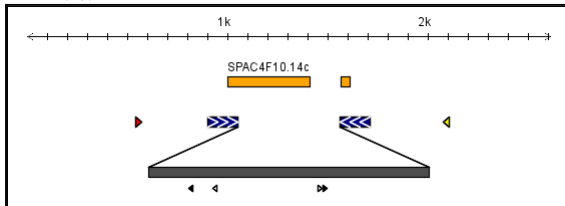

SPAC4F10.15c

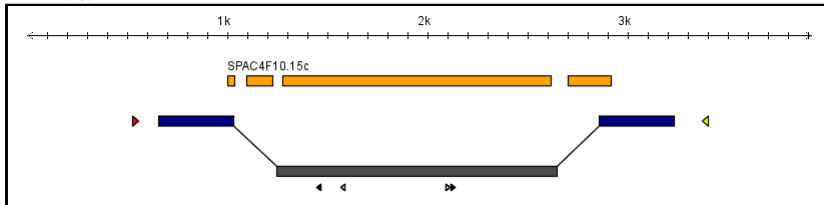

SPAC4F10.17

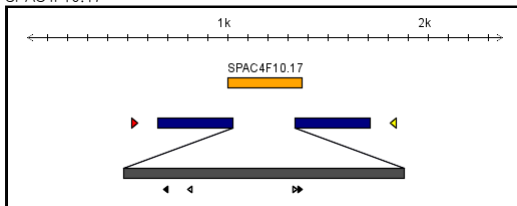

SPAC4F10.18

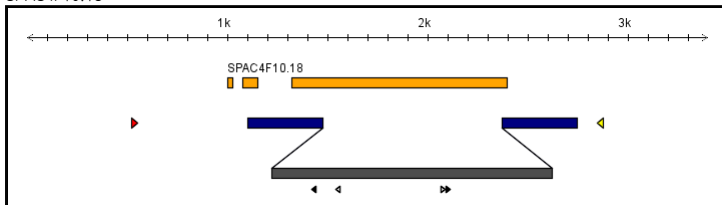

SPAC4F10.19c

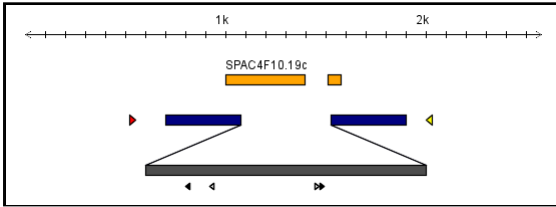

SPAC4F10.20

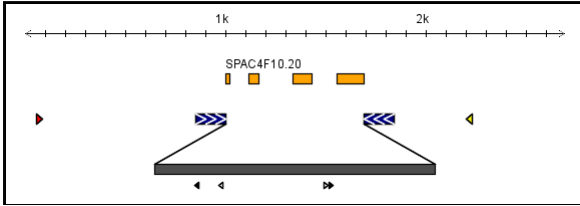

SPAC4F8.01

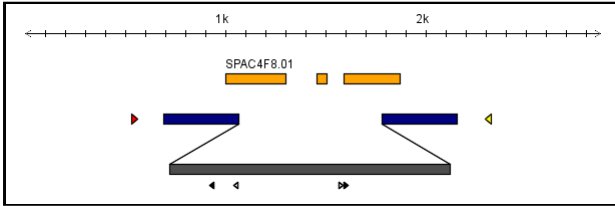

SPAC4F8.02c

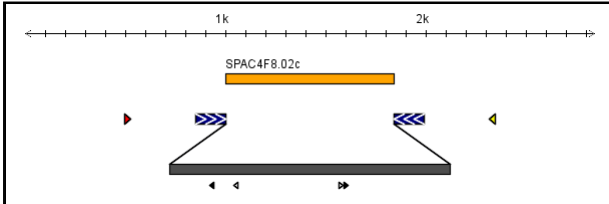

SPAC4F8.03

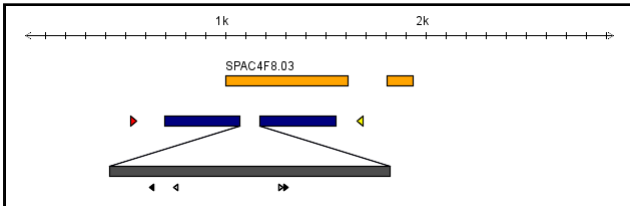

SPAC4F8.04

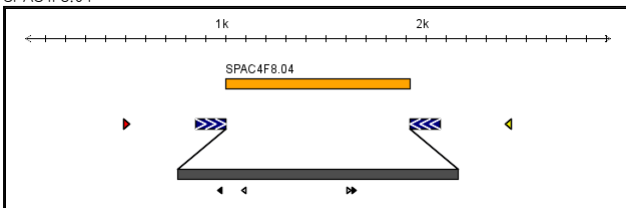

SPAC4F8.05c

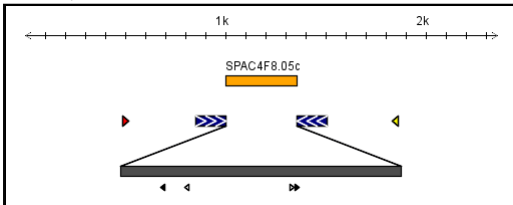

SPAC4F8.06

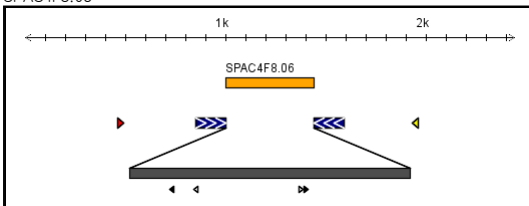

SPAC4F8.07c

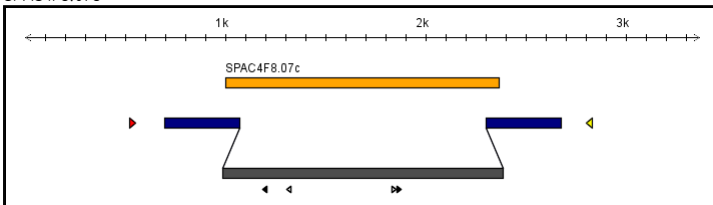

SPAC4F8.08

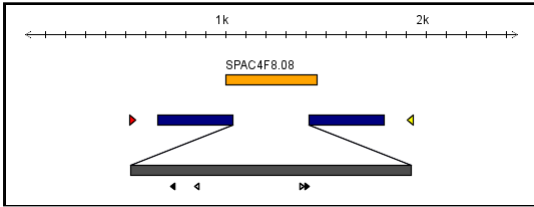

SPAC4F8.10c

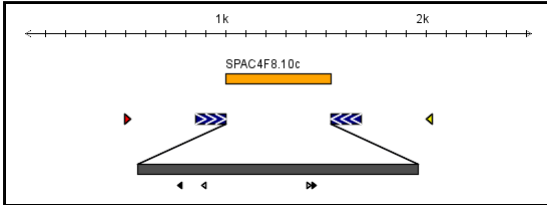

SPAC4F8.11

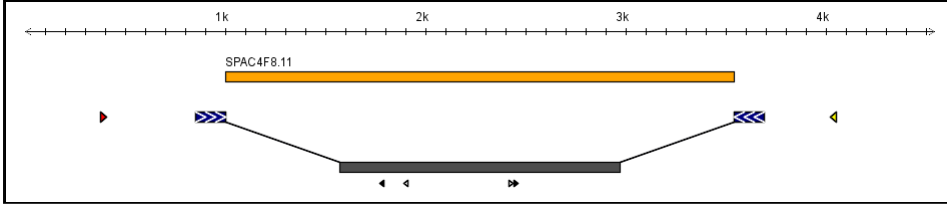

SPAC4F8.14c

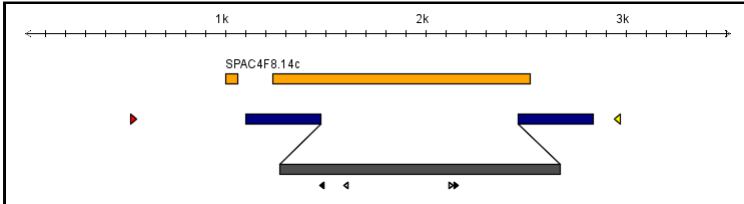

SPAC4F8.15

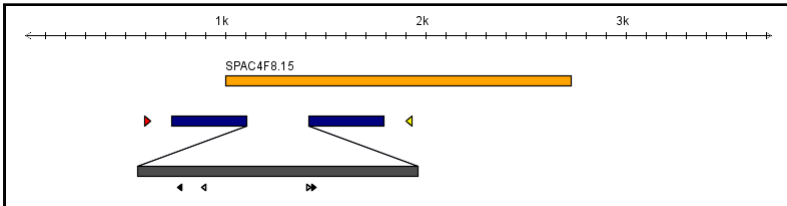

SPAC4G8.02c

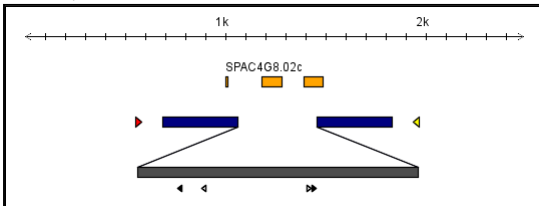

SPAC4G8.03c

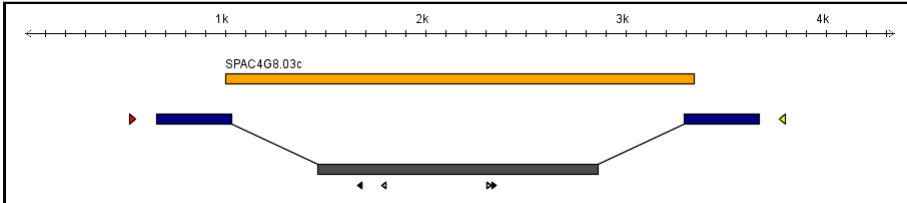

SPAC4G8.04

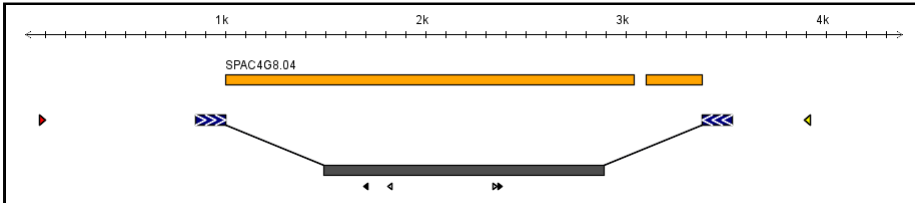

SPAC4G8.05

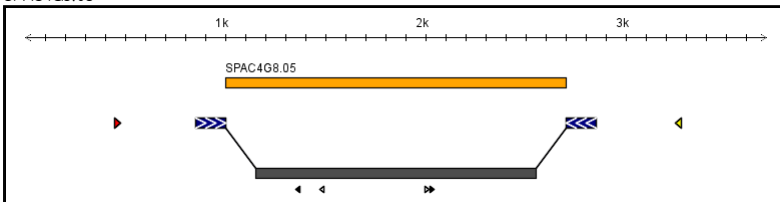

SPAC4G8.06c

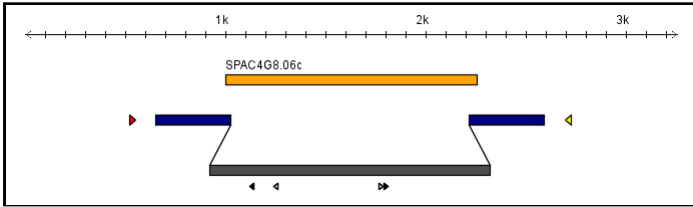

SPAC4G8.07c

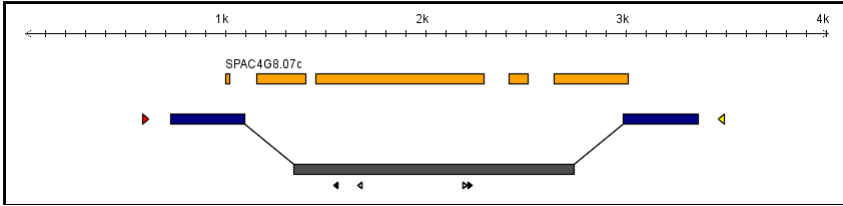

SPAC4G8.08

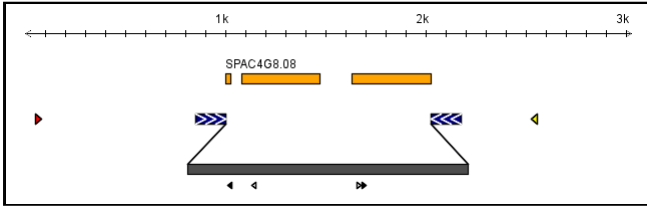

SPAC4G8.09

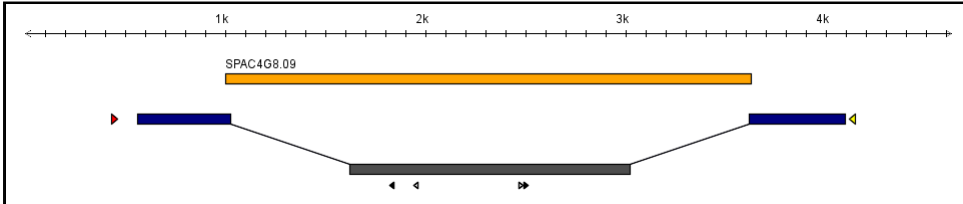

SPAC4G8.10

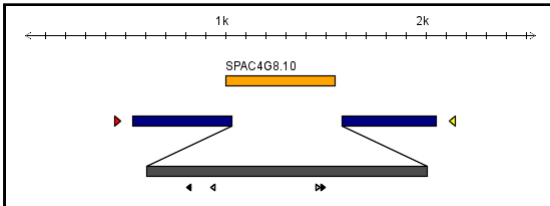

SPAC4G8.11c

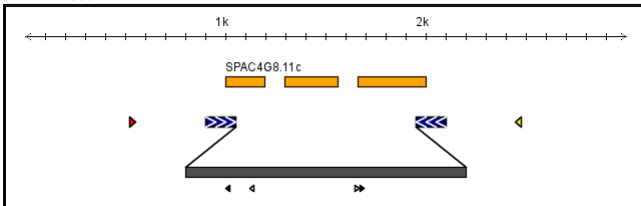

SPAC4G8.12c

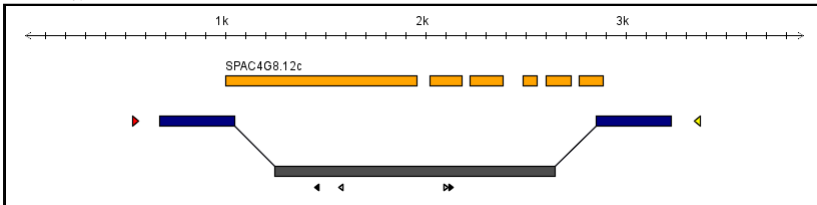

SPAC4G8.13c

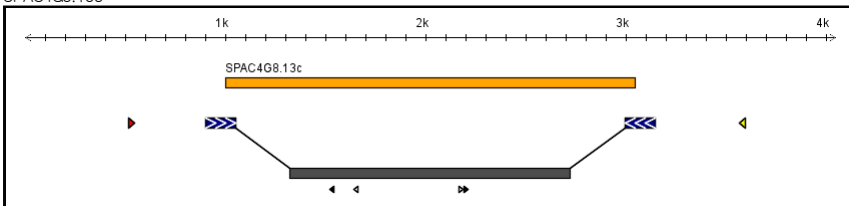

SPAC4G9.02

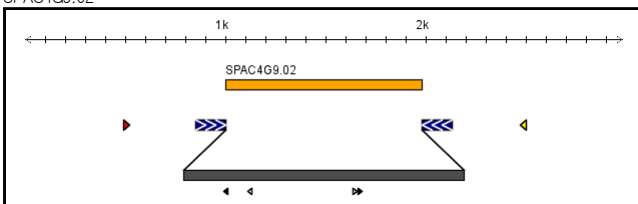

SPAC4G9.03

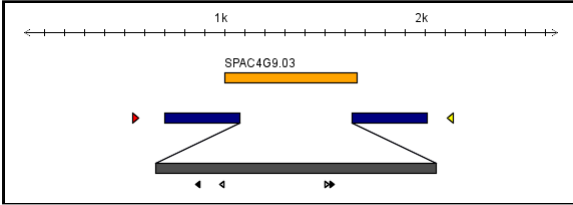

SPAC4G9.04c

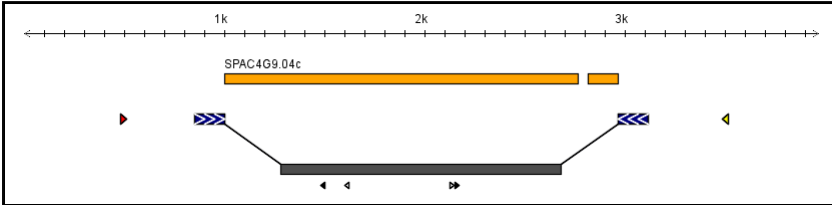

SPAC4G9.05

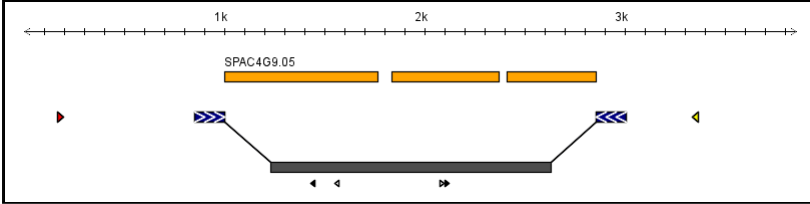

SPAC4G9.06c

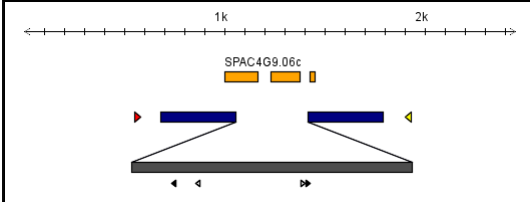

SPAC4G9.07

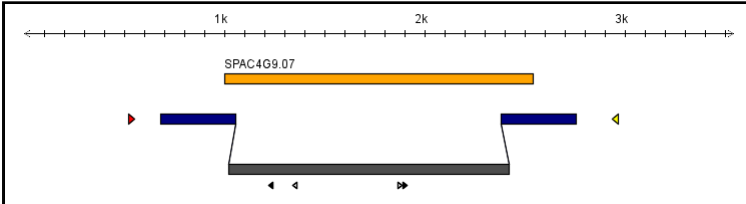

SPAC4G9.09c

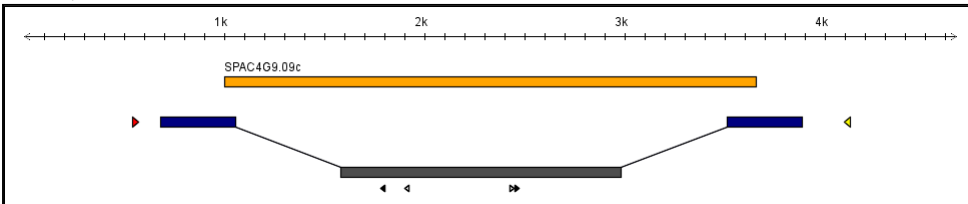

SPAC4G9.10

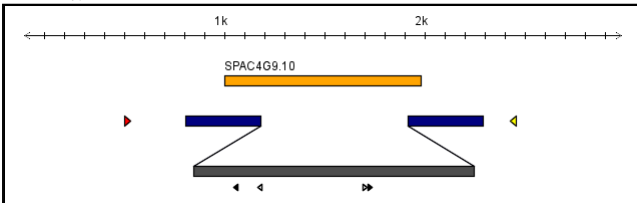

SPAC4G9.11c

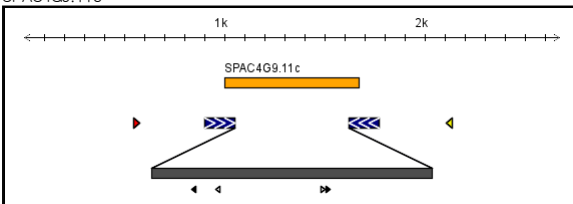

SPAC4G9.12

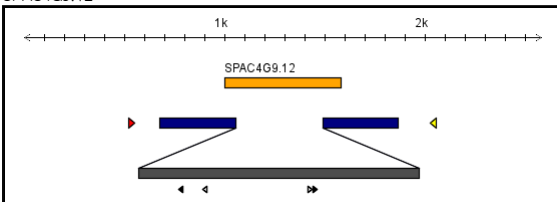



SPAC4G9.13c

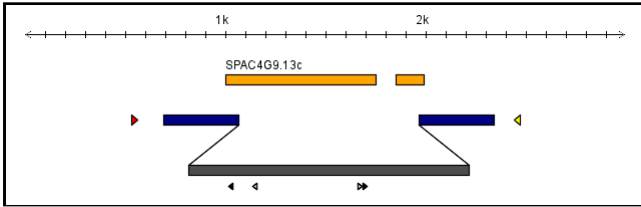

SPAC4G9.14

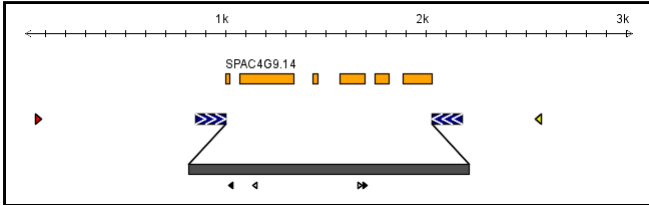

SPAC4G9.15

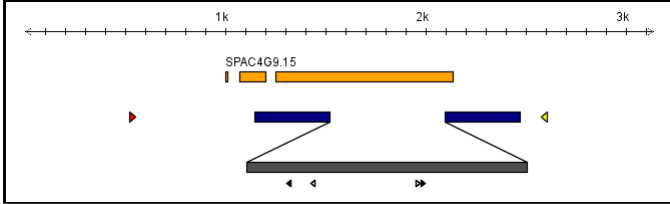

SPAC4G9.16c

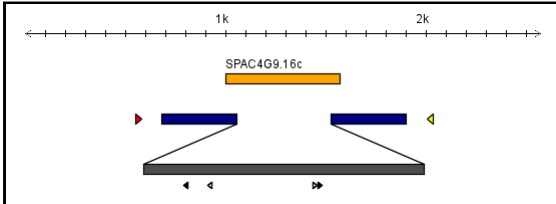

SPAC4G9.17c

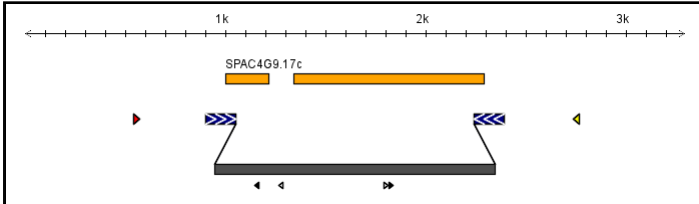

SPAC4G9.19

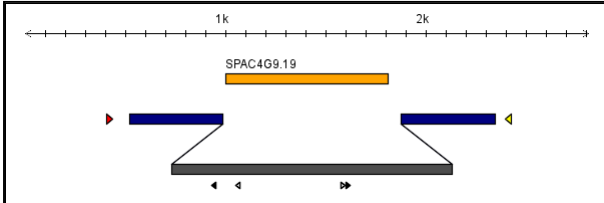

SPAC4G9.20c

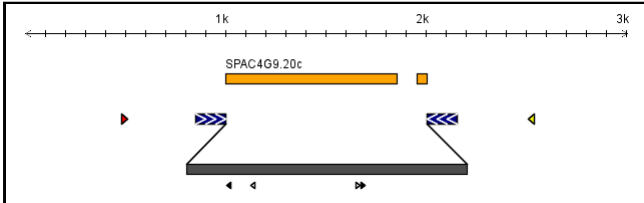

SPAC4H3.01

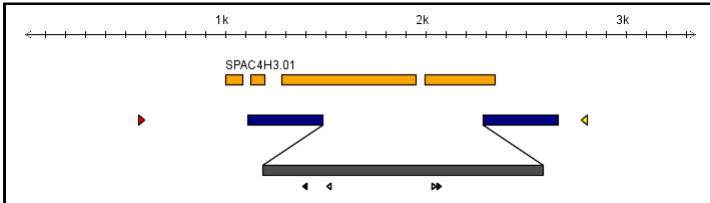

SPAC4H3.02c

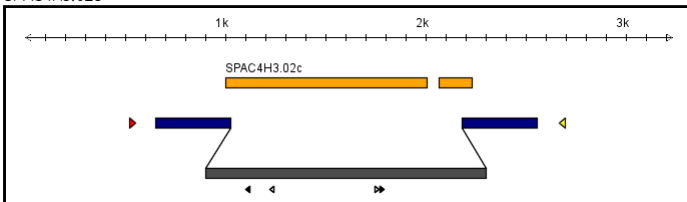

SPAC4H3.03c

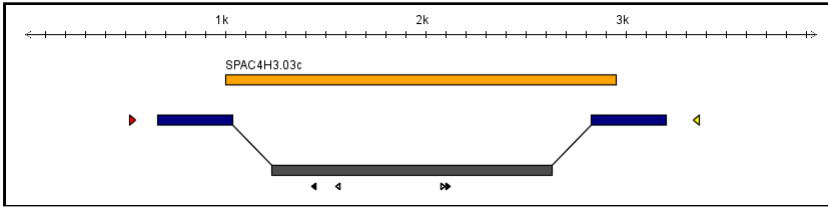

SPAC4H3.04c

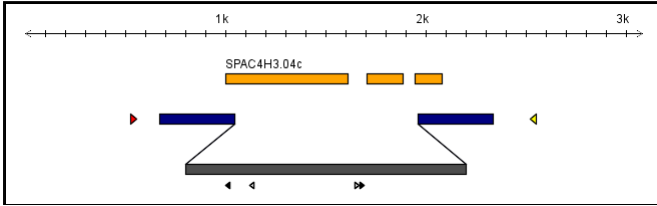

SPAC4H3.05

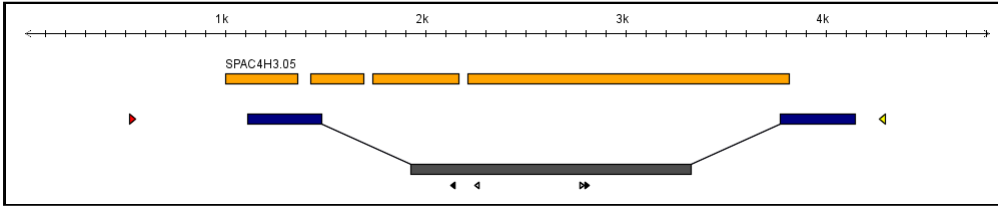

SPAC4H3.06

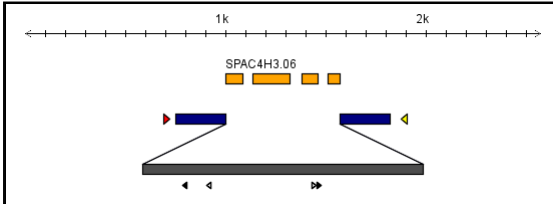

SPAC4H3.07c

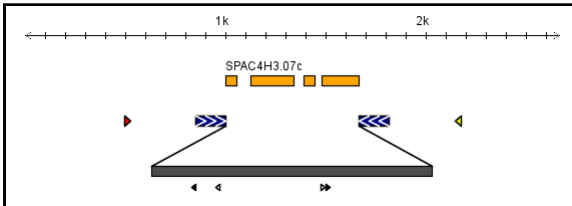

SPAC4H3.08

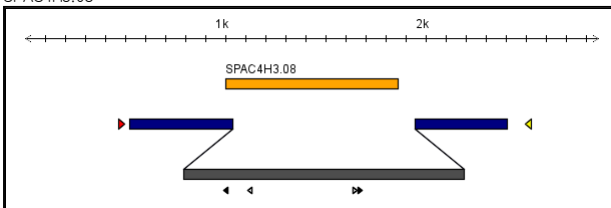

SPAC4H3.09

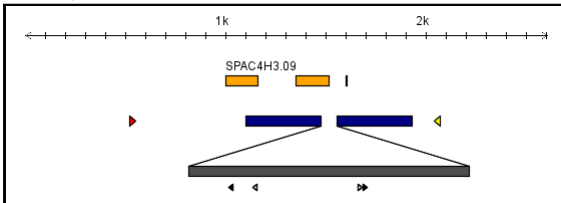

SPAC4H3.10c

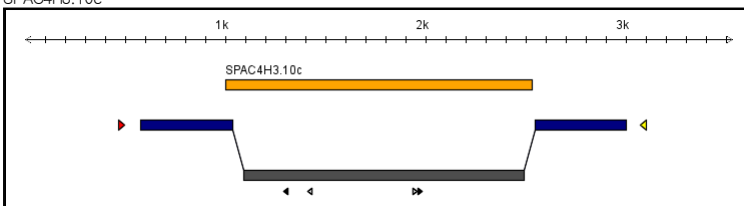

SPAC4H3.11c

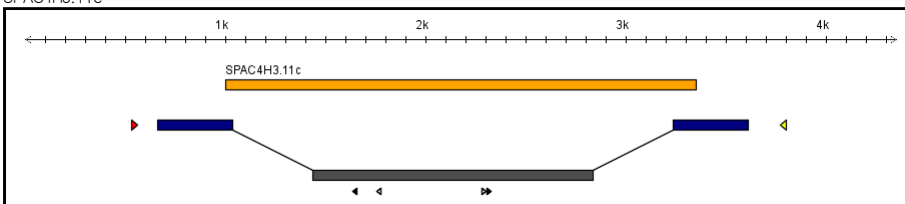

SPAC4H3.13

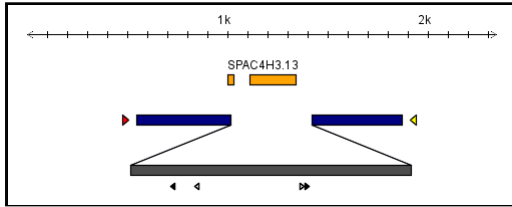

SPAC4H3.14c

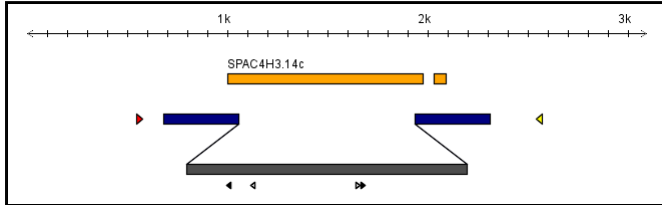

SPAC5D6.01

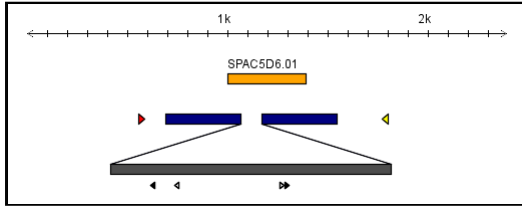

SPAC5D6.02c

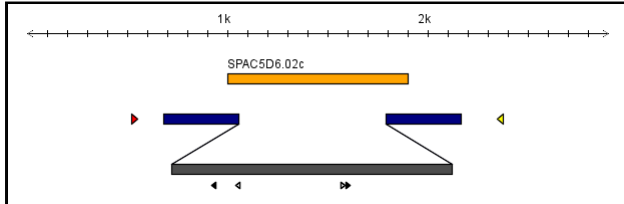

SPAC5D6.04

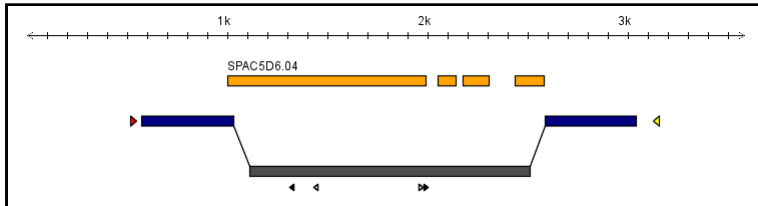

SPAC5D6.05

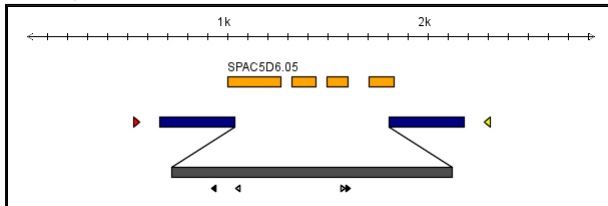

SPAC5D6.06c

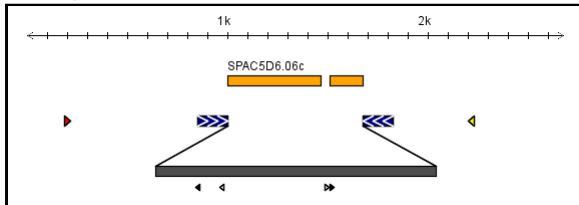

SPAC5D6.07c

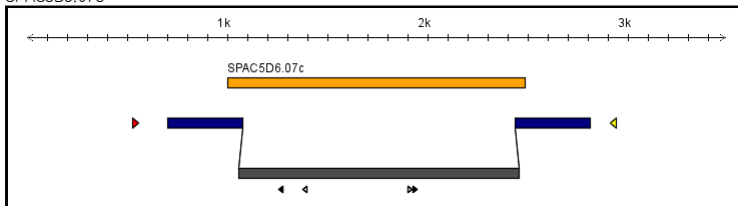

SPAC5D6.08c

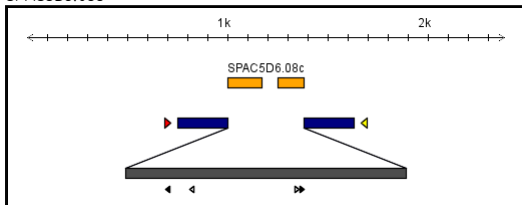

SPAC5D6.09c

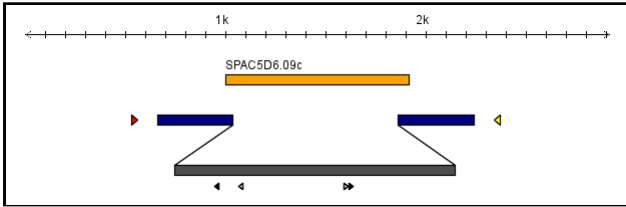

SPAC5D6.10c

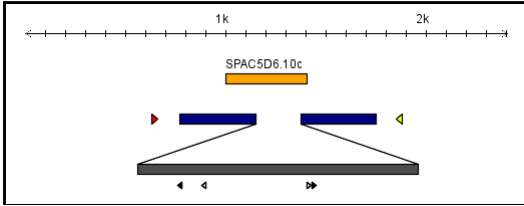

SPAC5D6.12

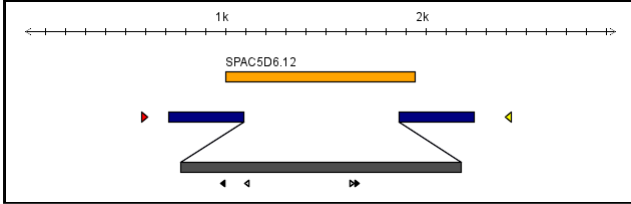

SPAC5D6.13

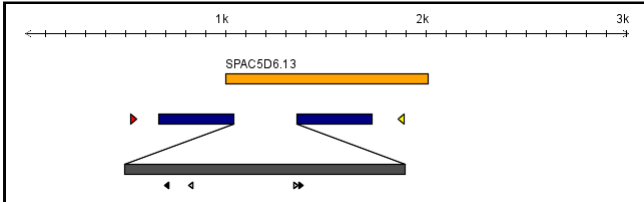

SPAC5H10.01

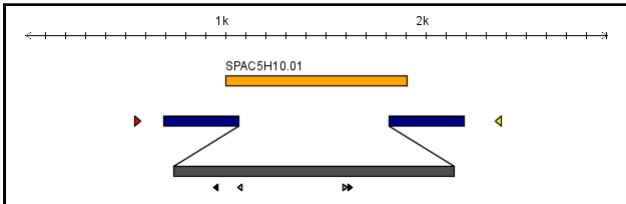

SPAC5H10.02c

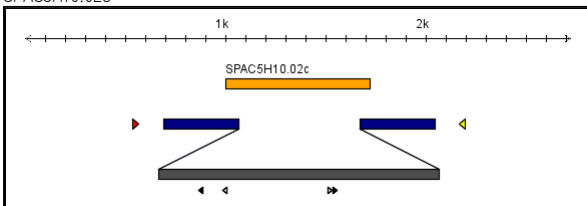

SPAC5H10.03

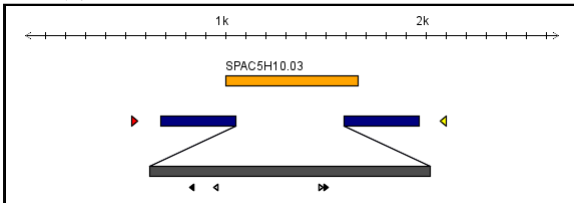

SPAC5H10.04

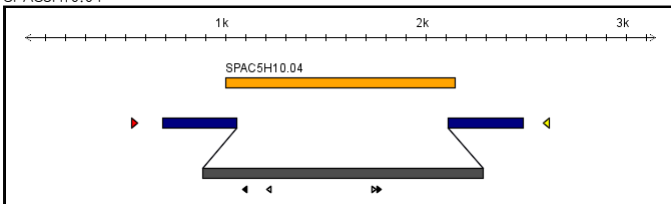

SPAC5H10.05c

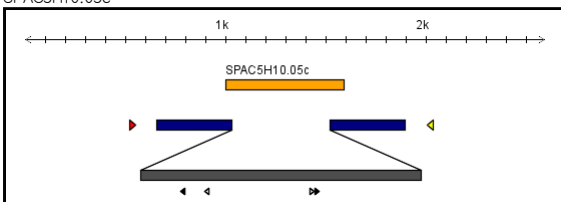

SPAC5H10.06c

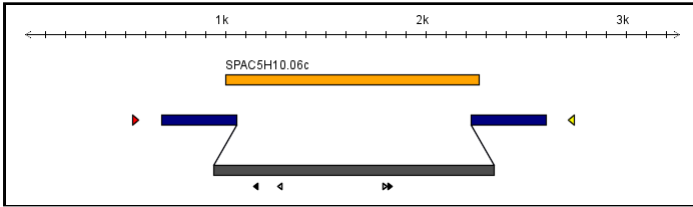

SPAC5H10.07

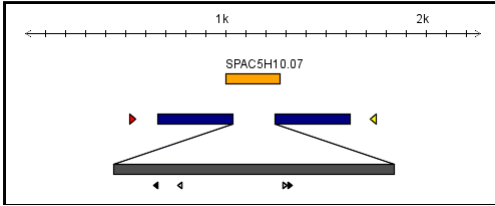

SPAC5H10.08c

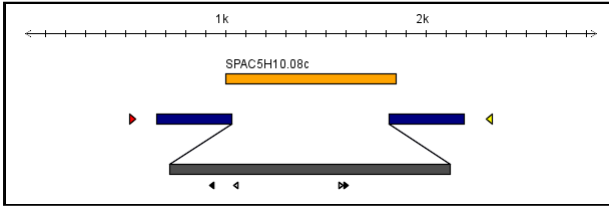

SPAC5H10.09c

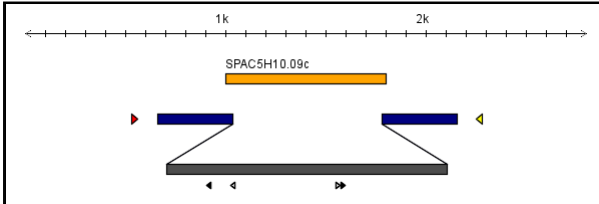

SPAC5H10.10

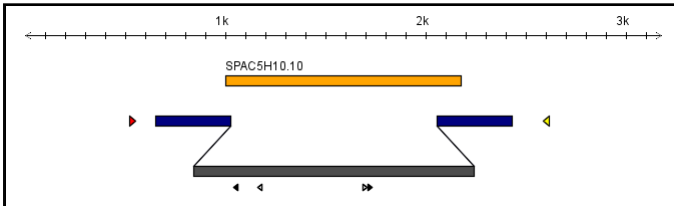

SPAC5H10.11

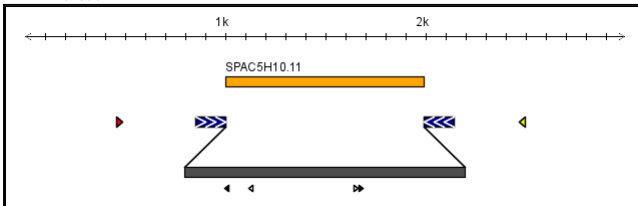

SPAC5H10.12c

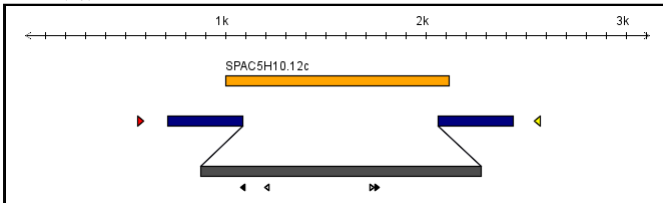

SPAC5H10.13c

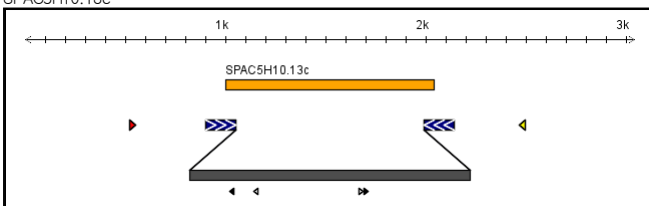

SPAC6B12.03c

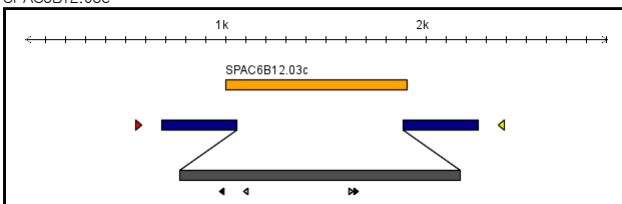

SPAC6B12.04c

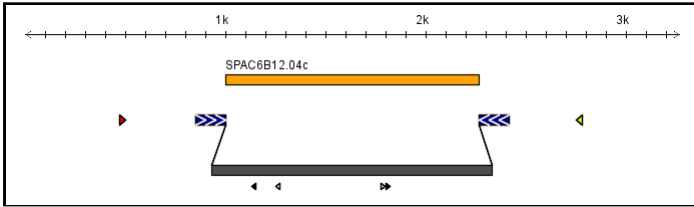

SPAC6B12.05c

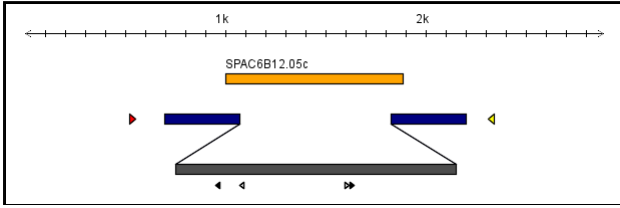

SPAC6B12.06c

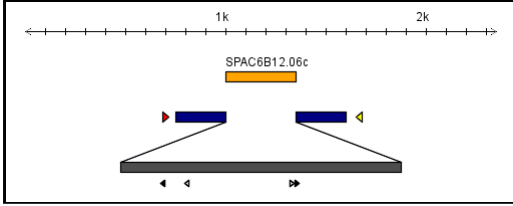

SPAC6B12.07c

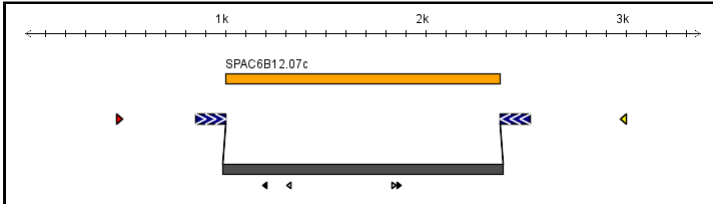

SPAC6B12.08

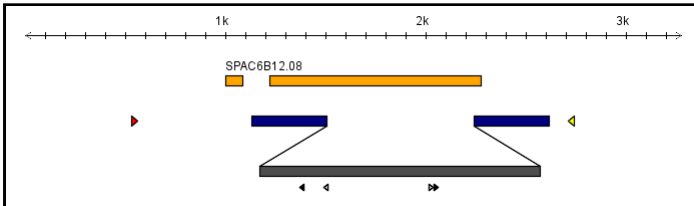

SPAC6B12.09

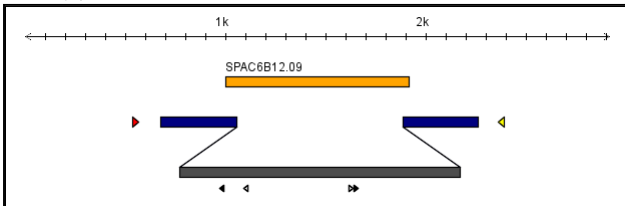

SPAC6B12.10c

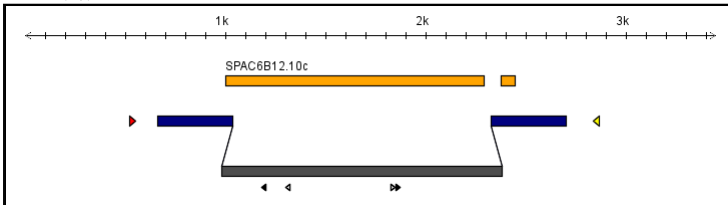

SPAC6B12.11

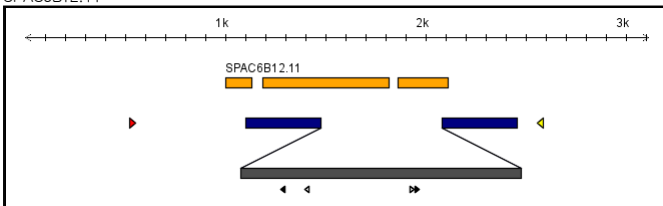

SPAC6B12.12

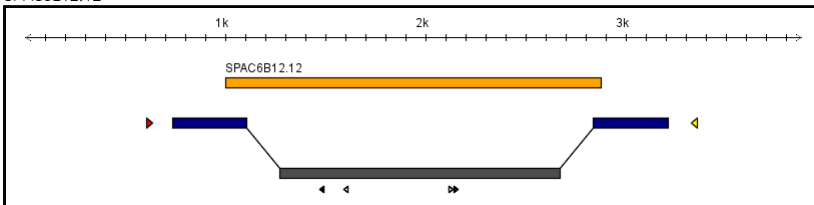

SPAC6B12.13

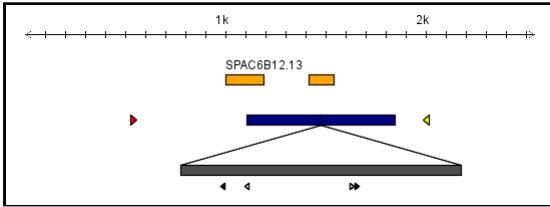

SPAC6B12.14c

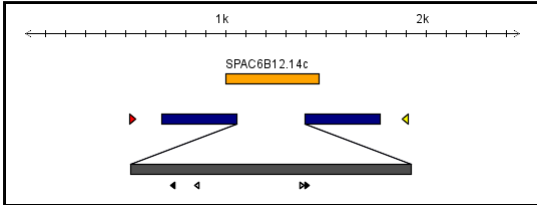

SPAC6B12.15

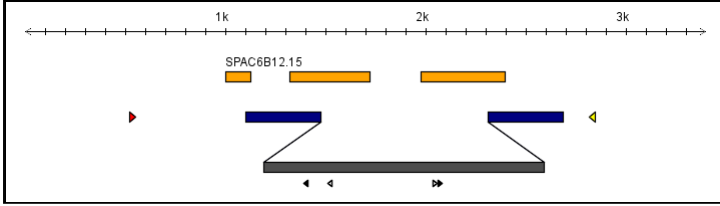

SPAC6B12.16

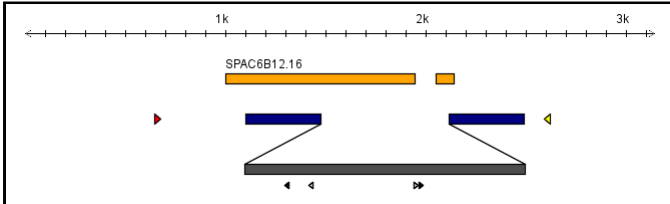

SPAC6C3.02c

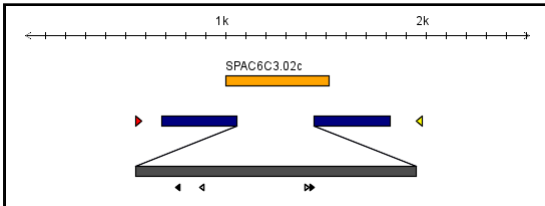

SPAC6C3.03c

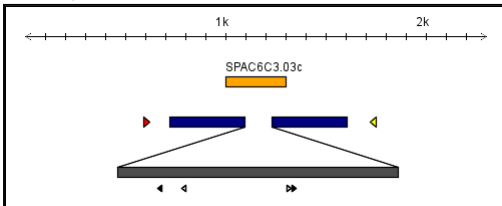

SPAC6C3.04

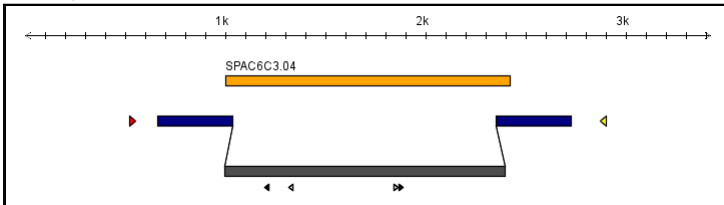

SPAC6C3.05

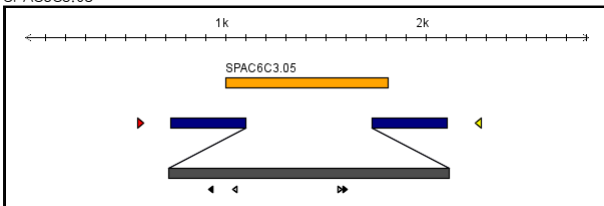

SPAC6C3.07

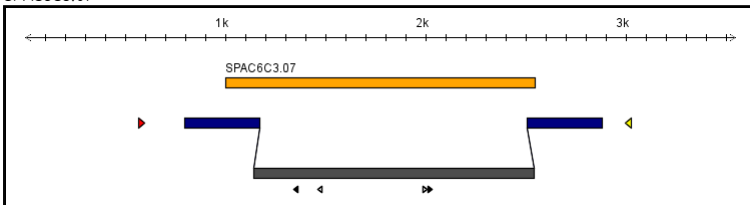

SPAC6C3.08

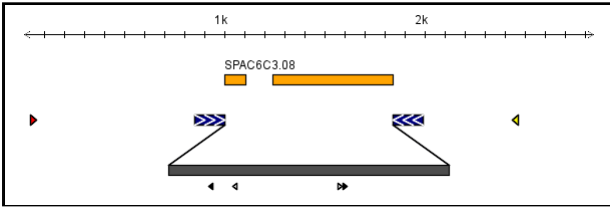

SPAC6C3.09

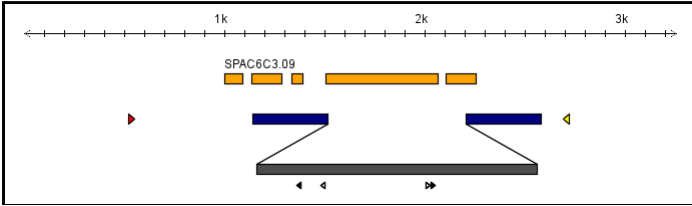

SPAC6F12.02

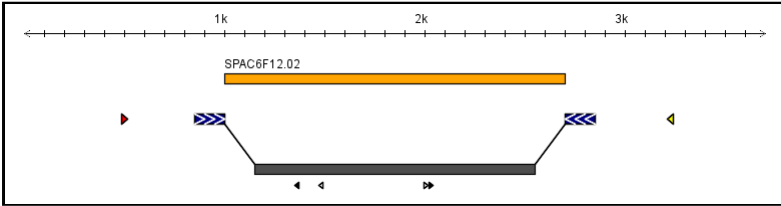

SPAC6F12.03c

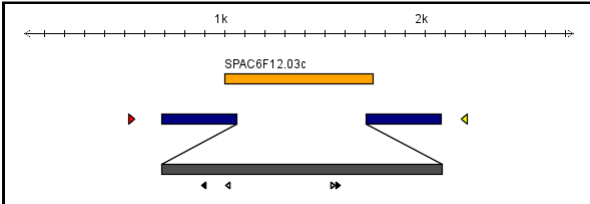

SPAC6F12.04

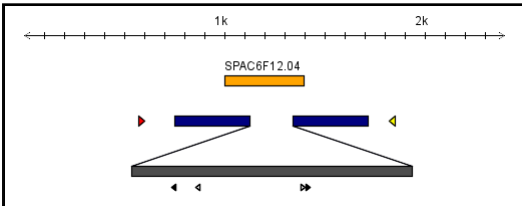

SPAC6F12.05c

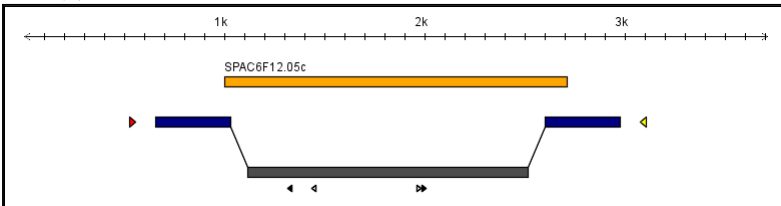

SPAC6F12.06

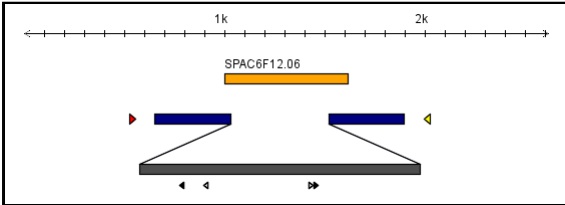

SPAC6F12.07

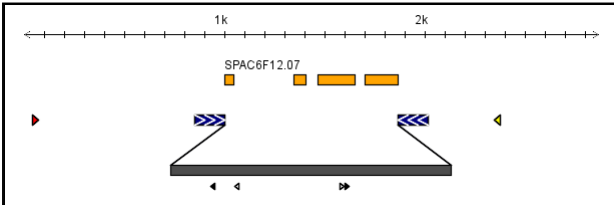

SPAC6F12.08c

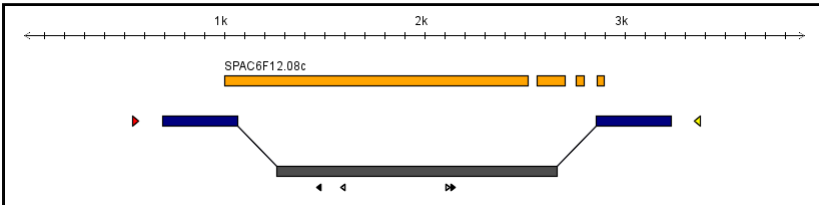



SPAC6F12.10c

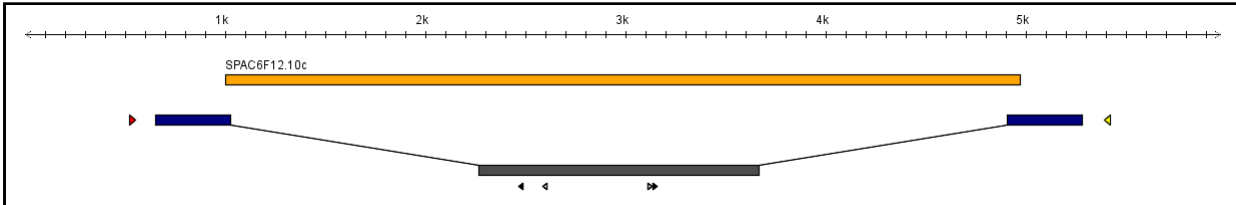

SPAC6F12.11c

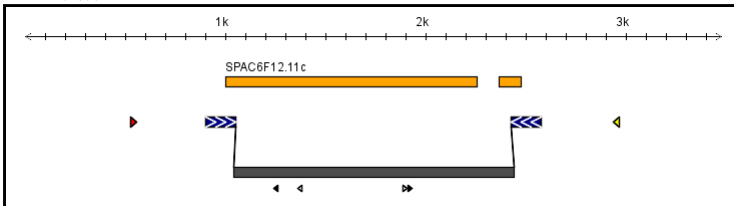

SPAC6F12.12

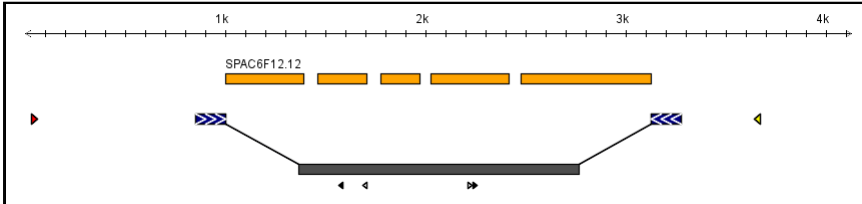

SPAC6F12.13c

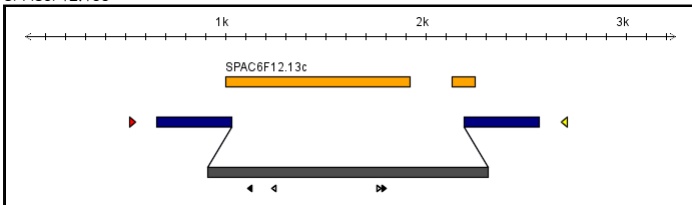

SPAC6F12.14

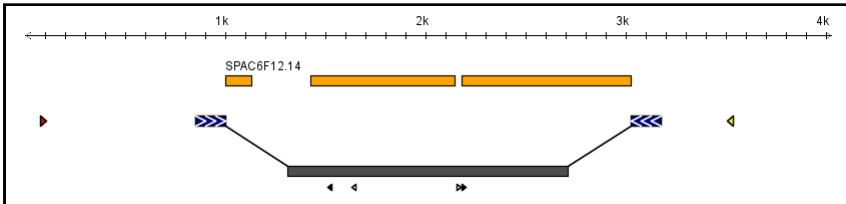

SPAC6F12.15c

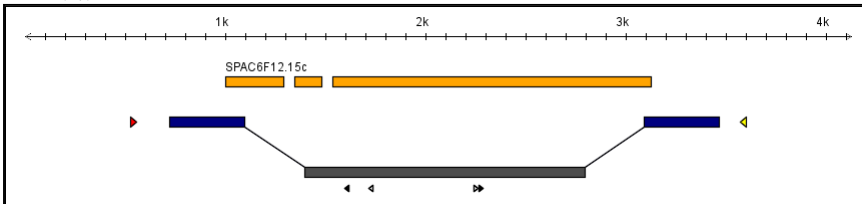

SPAC6F12.17

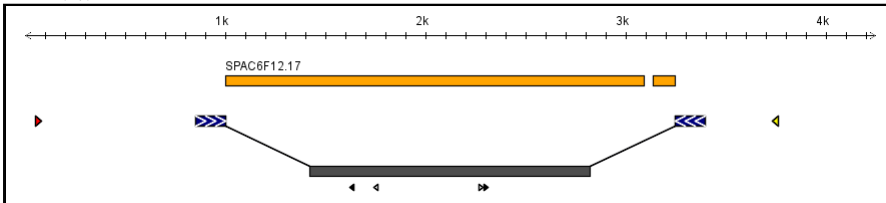

SPAC6F6.02c

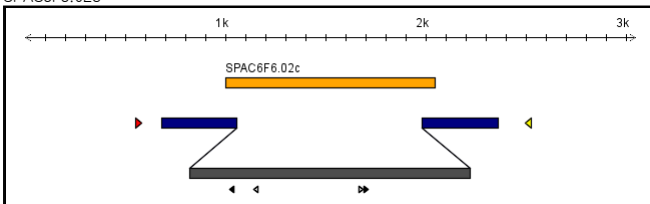

SPAC6F6.03c

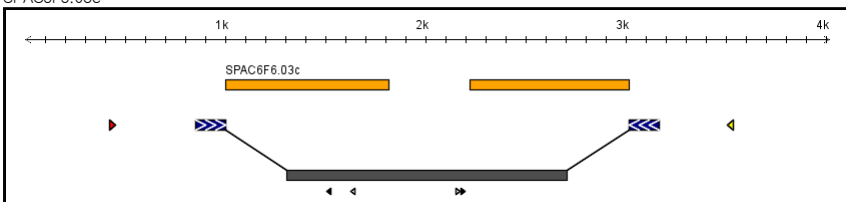

SPAC6F6.04c

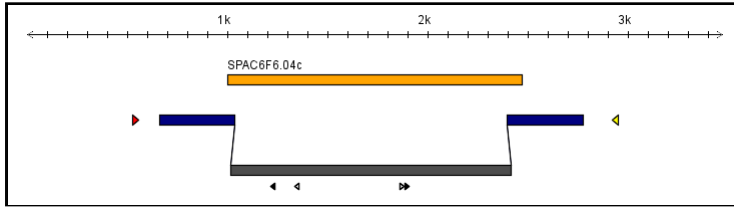

SPAC6F6.05

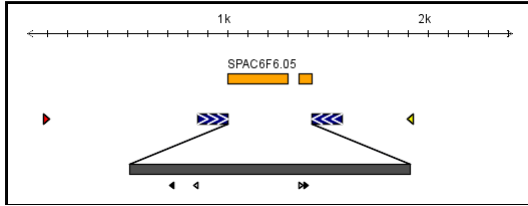

SPAC6F6.07c

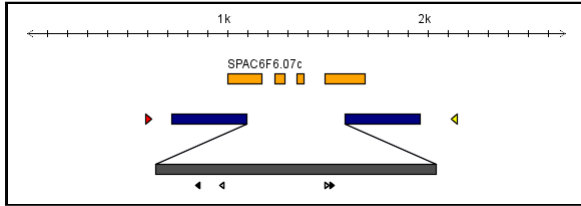

SPAC6F6.08c

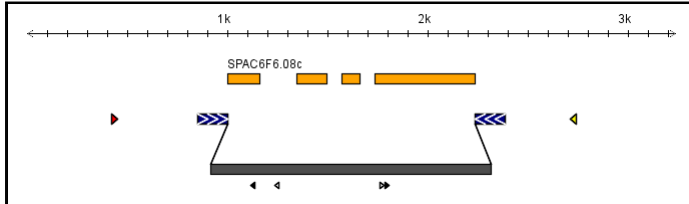

SPAC6F6.09

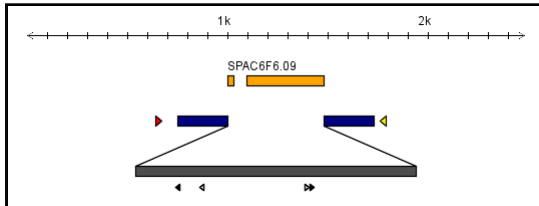

SPAC6F6.10c

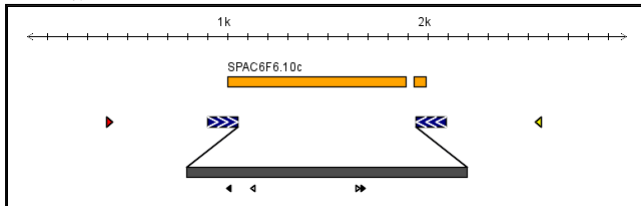

SPAC6F6.11c

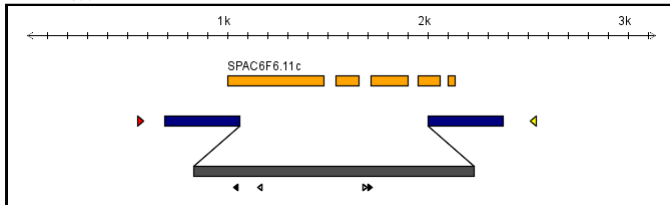

SPAC6F6.12

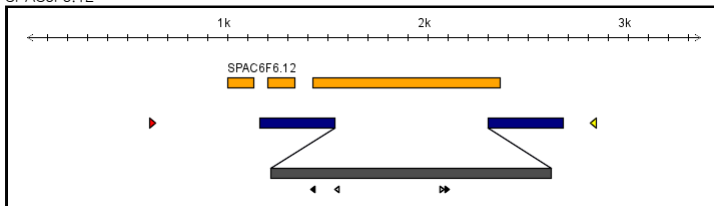

SPAC6F6.13c

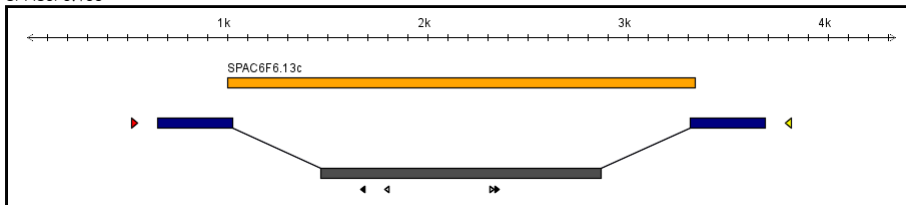

SPAC6F6.15

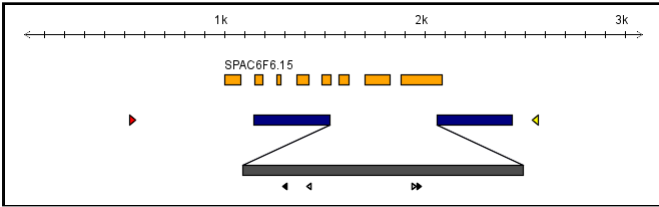

SPAC6F6.16c

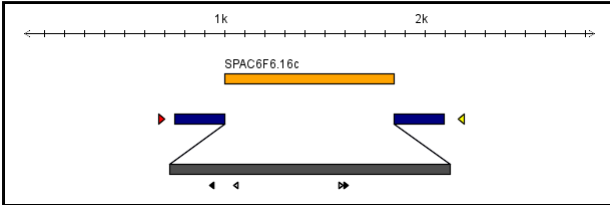

SPAC6F6.17

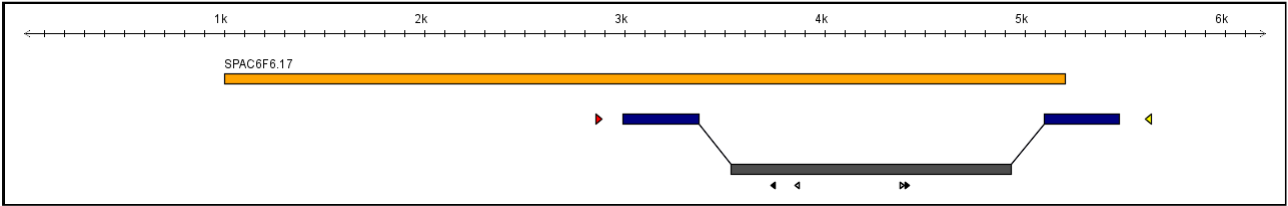

SPAC6G10.03c

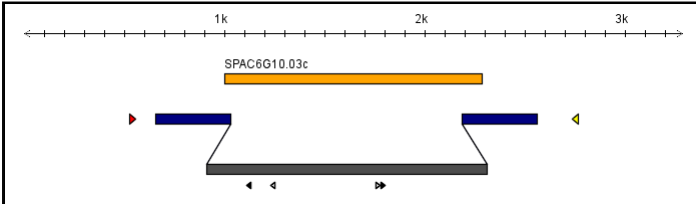

SPAC6G10.04c

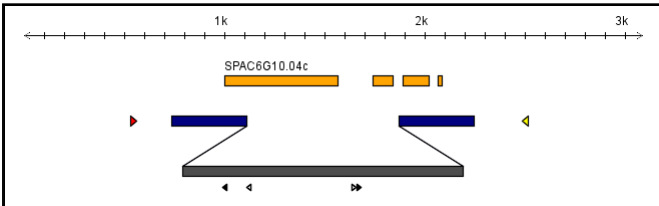

SPAC6G10.06

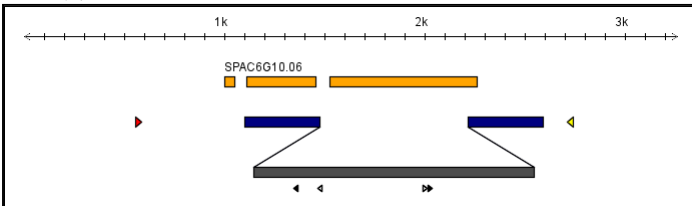

SPAC6G10.07

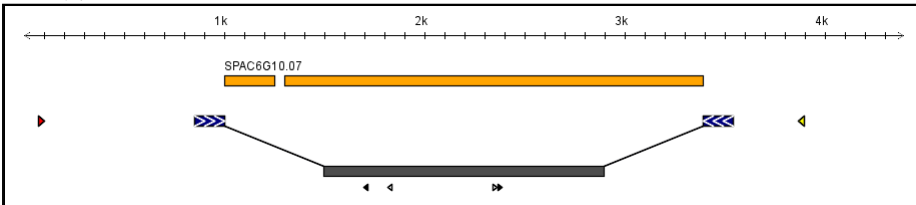

SPAC6G10.08

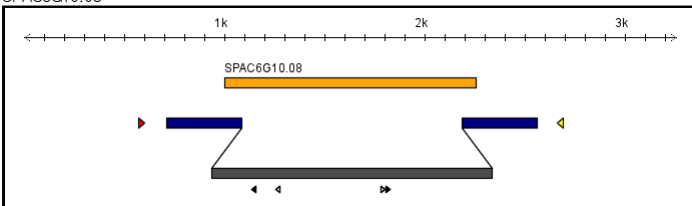

SPAC6G10.09

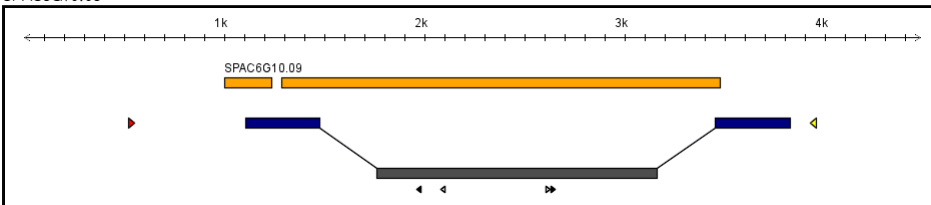

SPAC6G10.10c

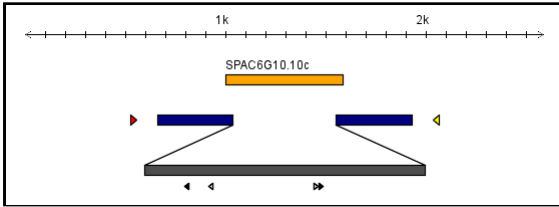

SPAC6G10.11c

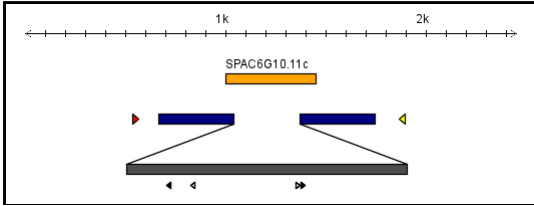

SPAC6G10.12c

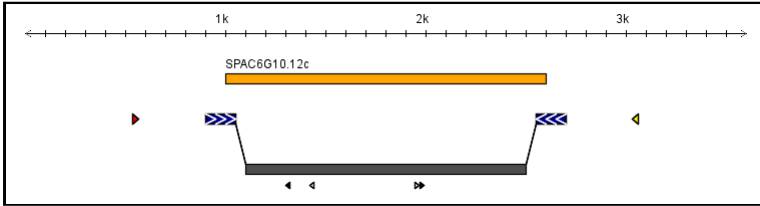

SPAC6G9.01c

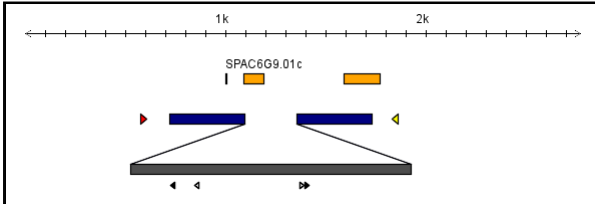

SPAC6G9.02c

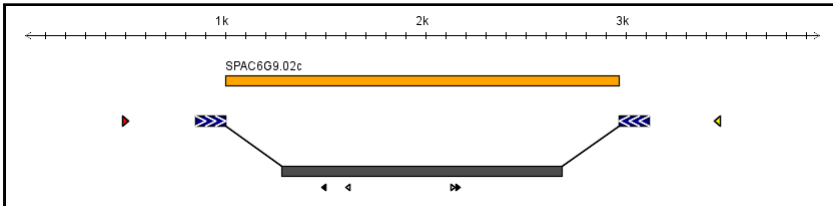

SPAC6G9.03c

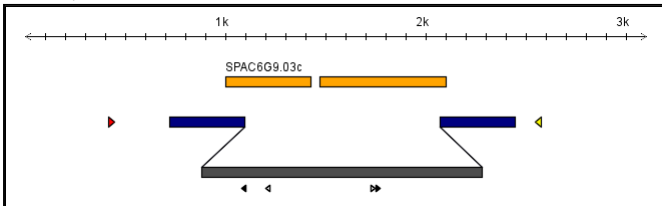

SPAC6G9.05

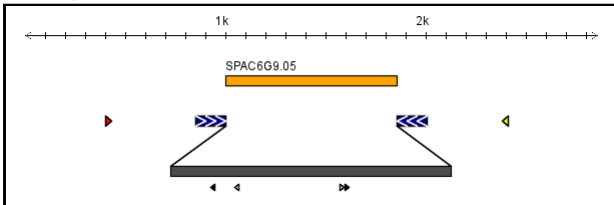

SPAC6G9.07c

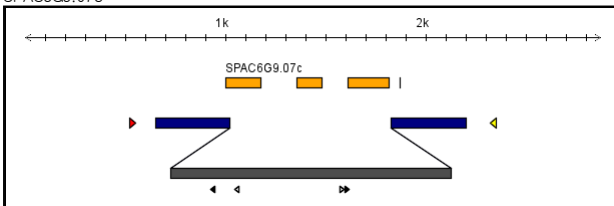

SPAC6G9.08

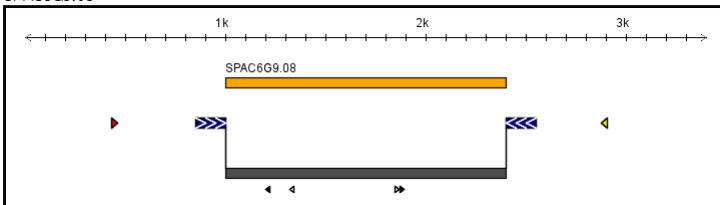

SPAC6G9.09c

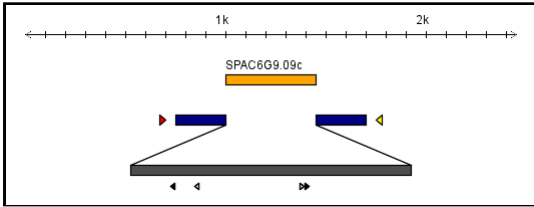

SPAC6G9.11

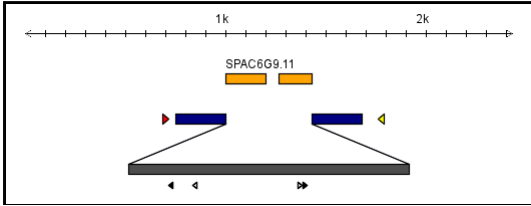

SPAC6G9.12

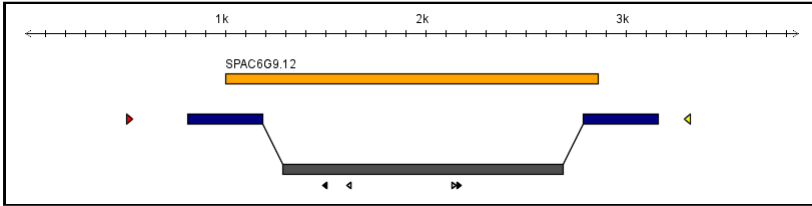

SPAC6G9.13c

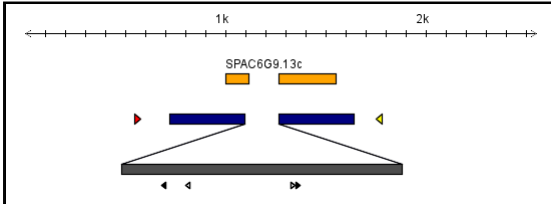

SPAC6G9.14

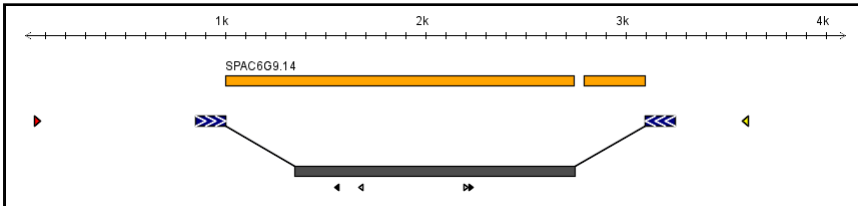

SPAC6G9.15c

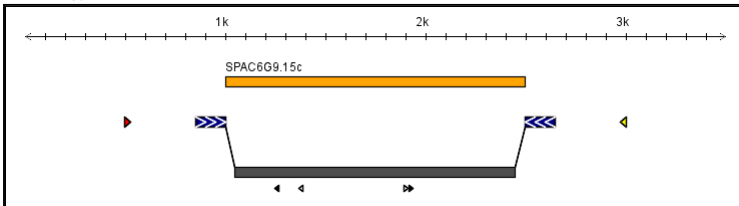

SPAC6G9.16c

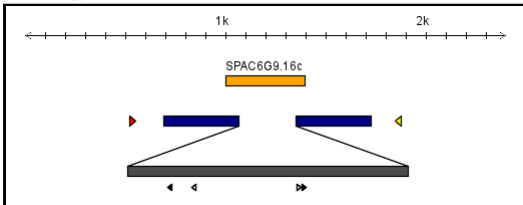

SPAC7D4.02c

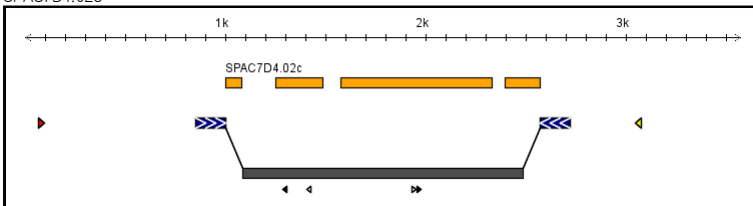

SPAC7D4.03c

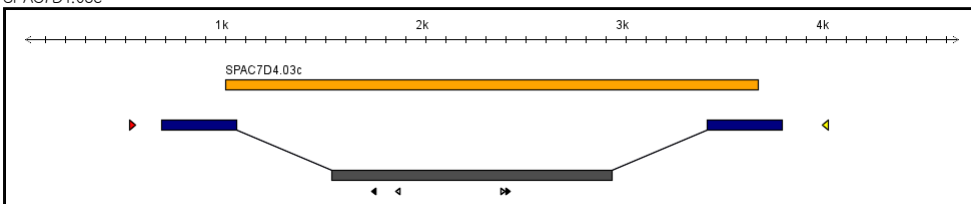

SPAC7D4.04

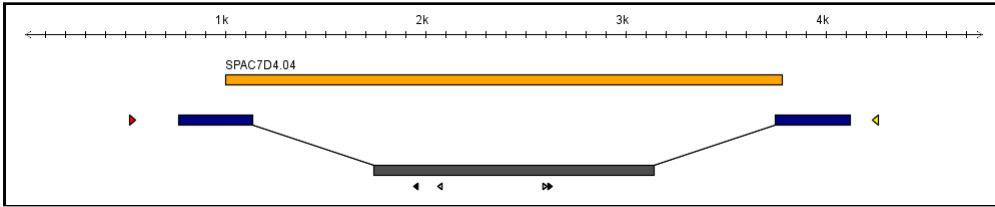

SPAC7D4.05

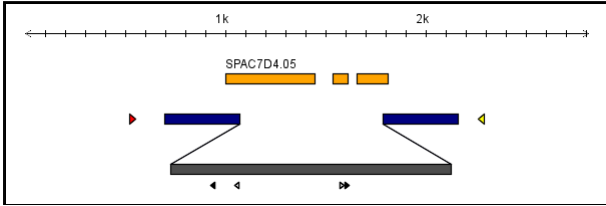

SPAC7D4.06c

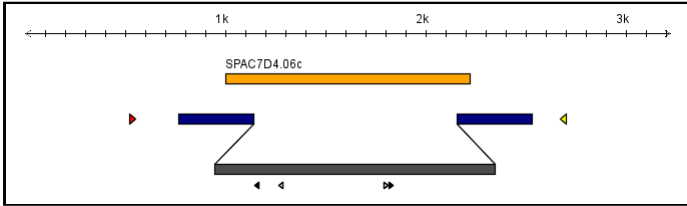

SPAC7D4.07c

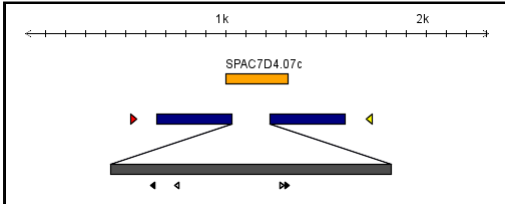

SPAC7D4.08

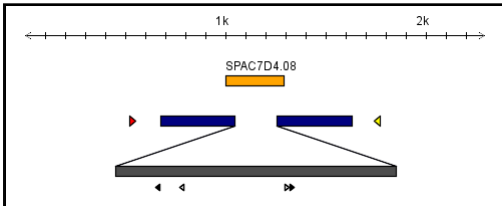

SPAC7D4.09c

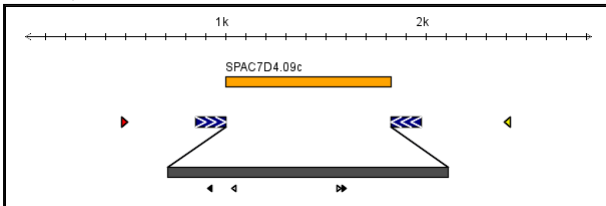

SPAC7D4.10

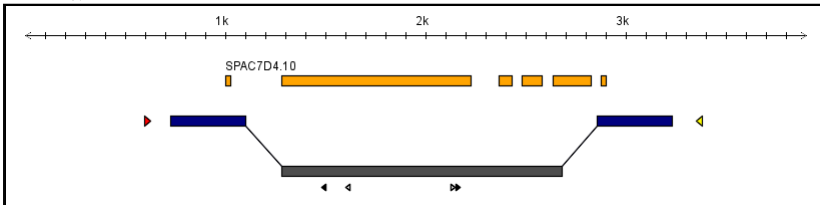

SPAC7D4.11c

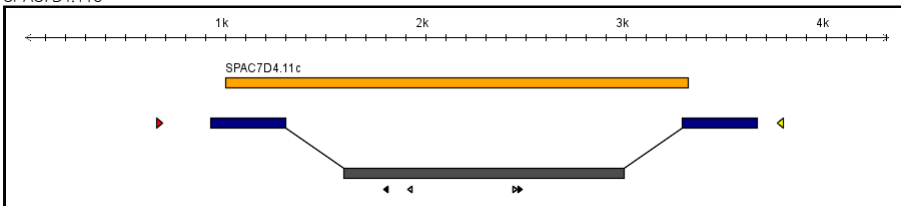

SPAC7D4.12c

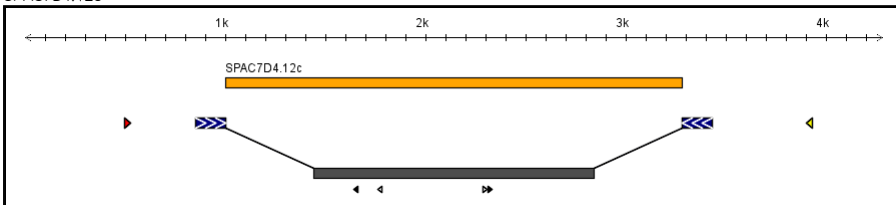

SPAC7D4.13c

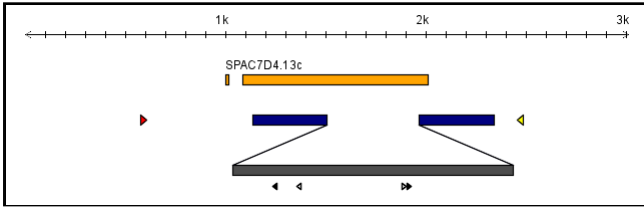

SPAC7D4.14c

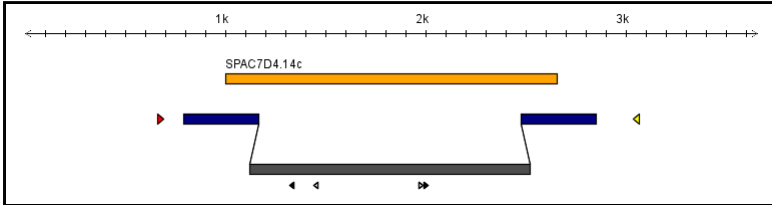

SPAC7D4.15c

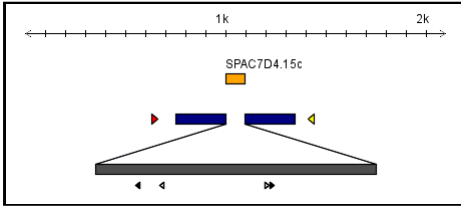

SPAC8C9.03

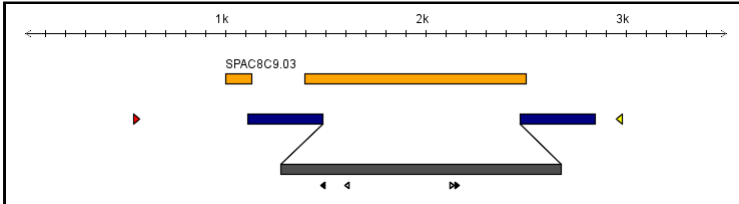

SPAC8C9.04

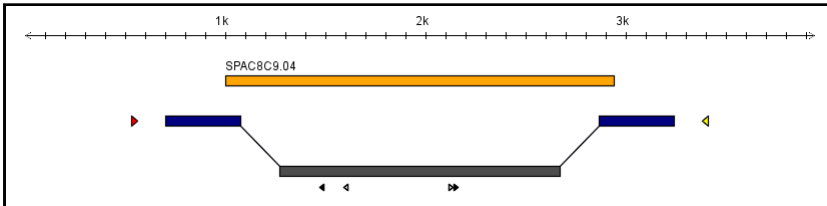

SPAC8C9.05

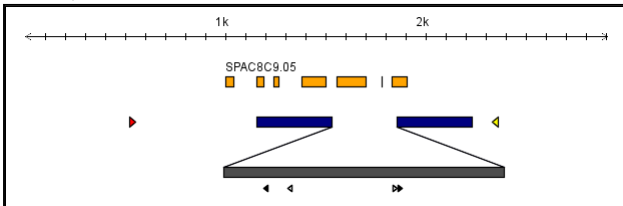

SPAC8C9.06c

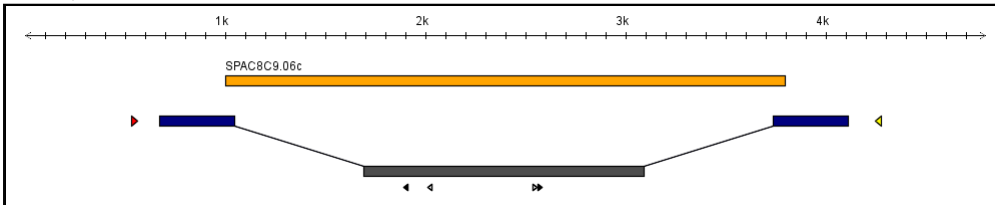

SPAC8C9.07

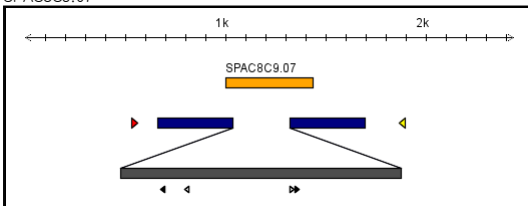

SPAC8C9.08

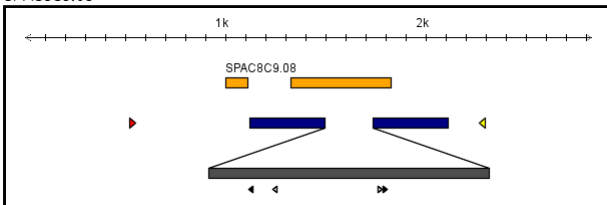

SPAC8C9.09c

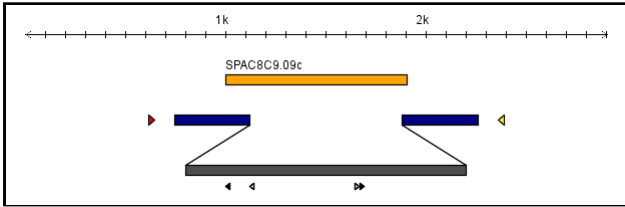

SPAC8C9.10c

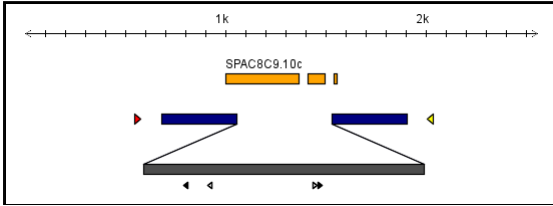

SPAC8C9.11

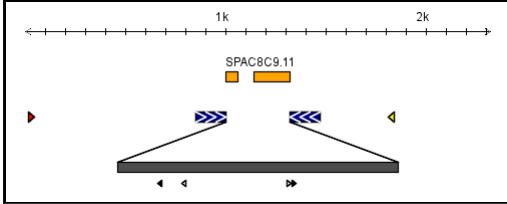

SPAC8C9.12c

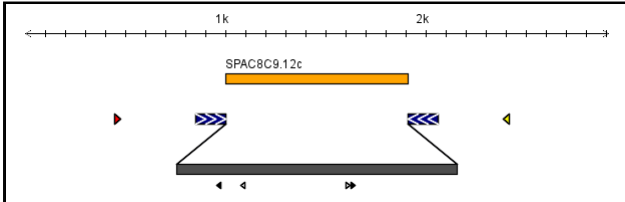

SPAC8C9.14

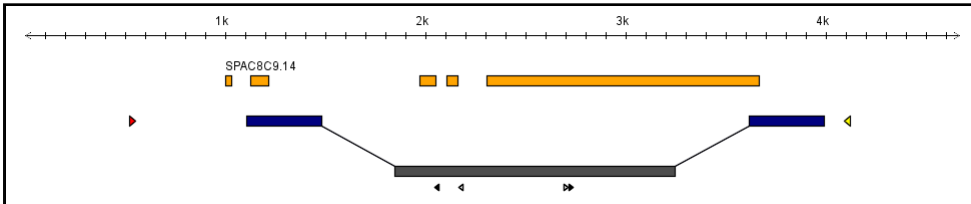

SPAC8C9.15c

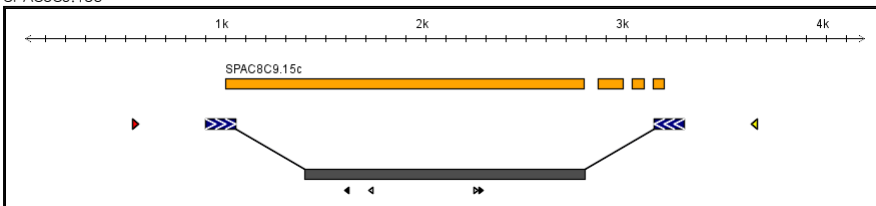

SPAC8C9.16c

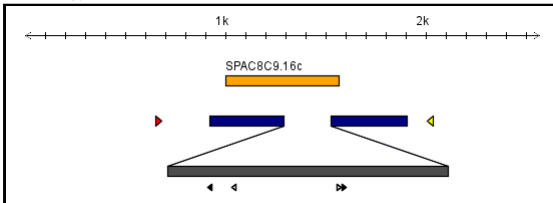

SPAC8C9.17c

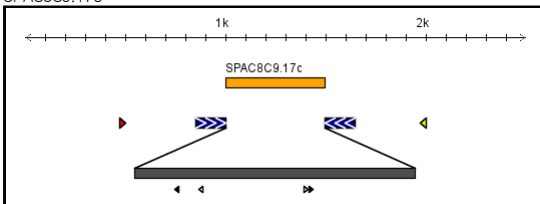

SPAC8C9.19

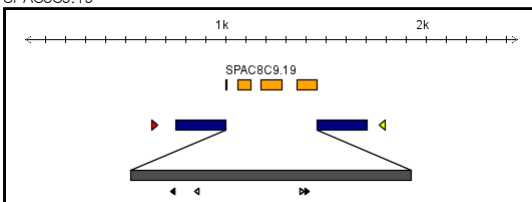



SPAC8E11.01c

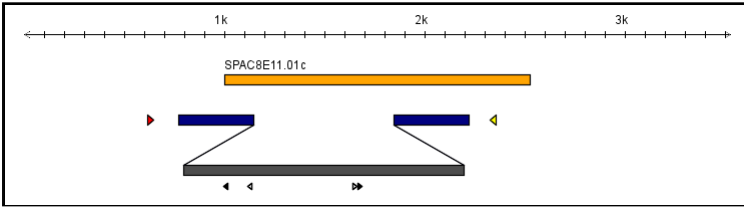

SPAC8E11.02c

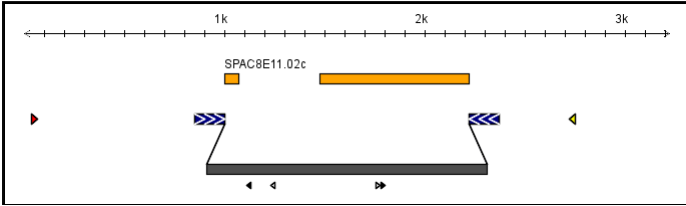

SPAC8E11.03c

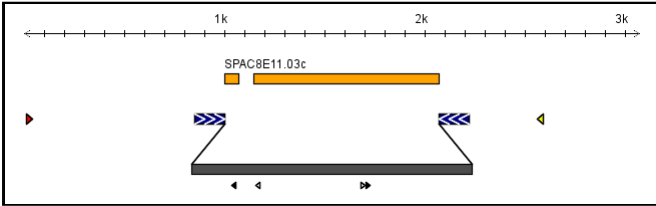

SPAC8E11.04c

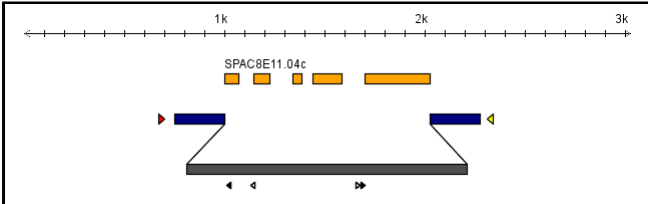

SPAC8E11.05c

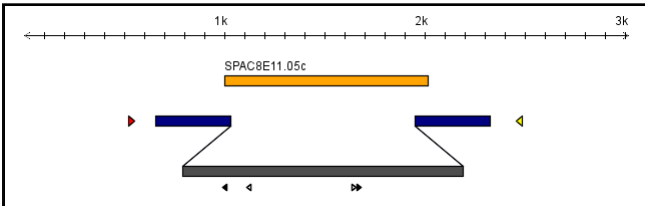

SPAC8E11.06

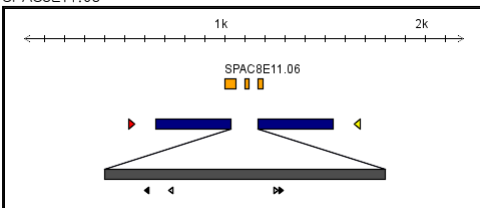

SPAC8E11.07c

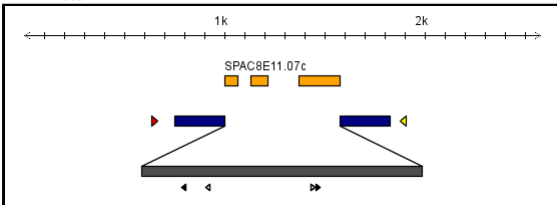

SPAC8E11.10

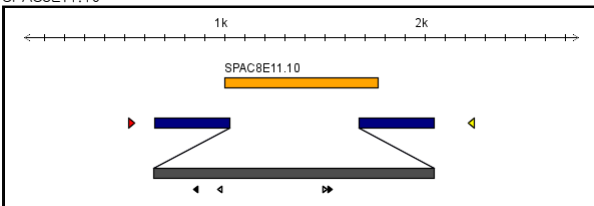

SPAC8F11.02c

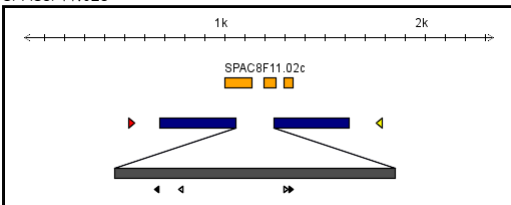

SPAC8F11.03

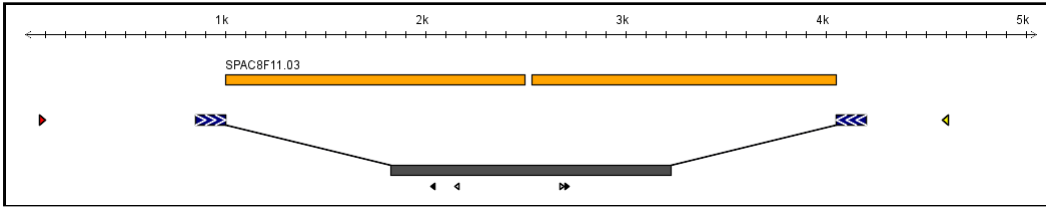

SPAC8F11.04

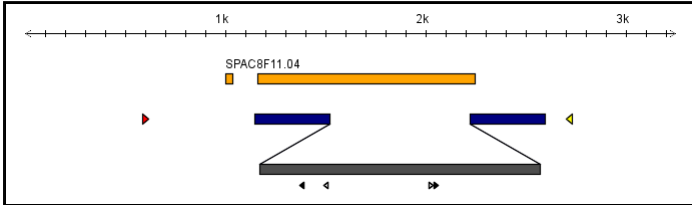

SPAC8F11.05c

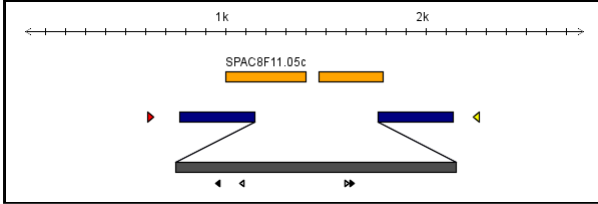

SPAC8F11.06

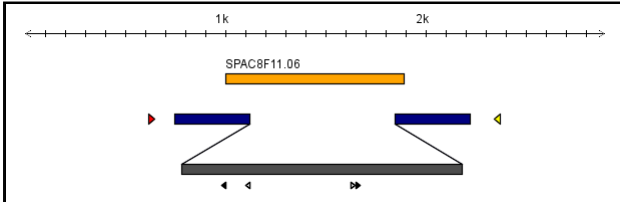

SPAC8F11.07c

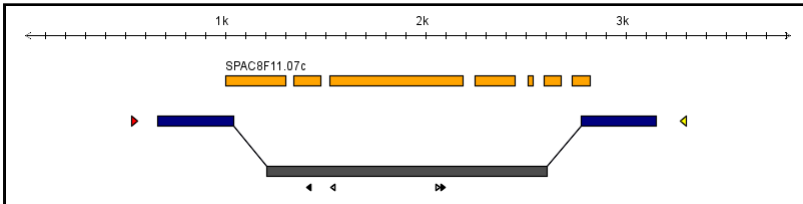

SPAC8F11.08c

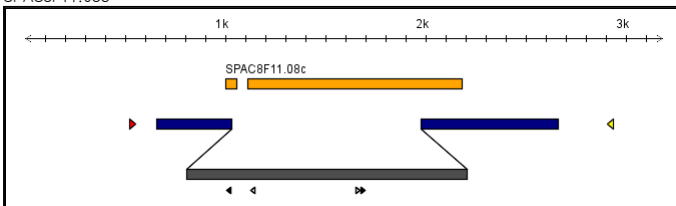

SPAC8F11.09c

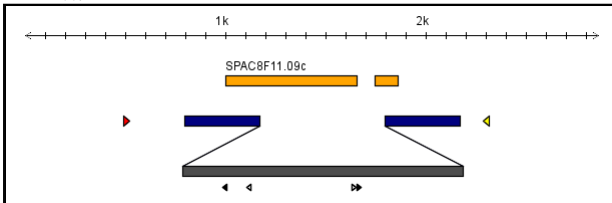

SPAC8F11.10c

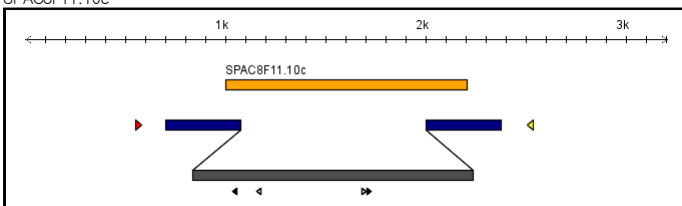

SPAC9.02c

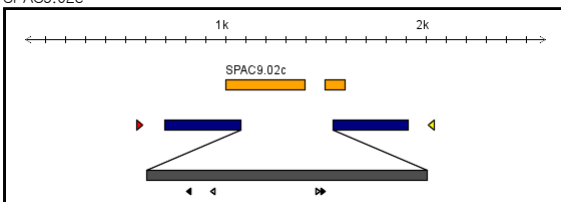

SPAC9.05

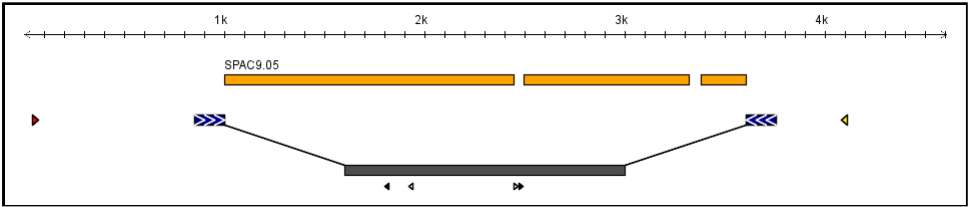

SPAC9.06c

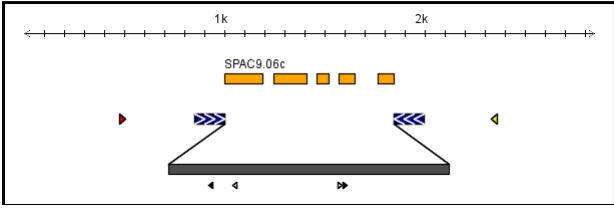

SPAC9.07c

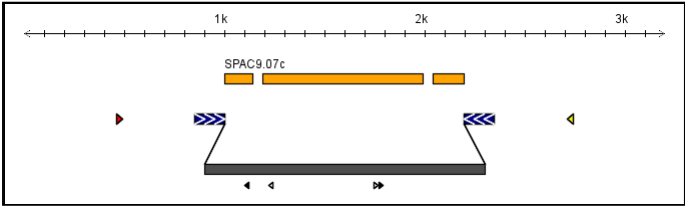

SPAC9.08c

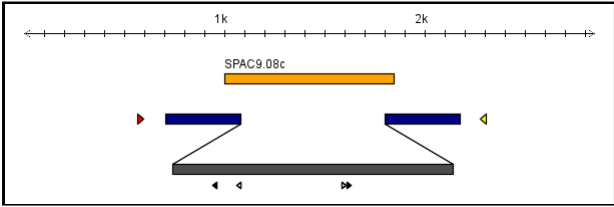

SPAC9.10

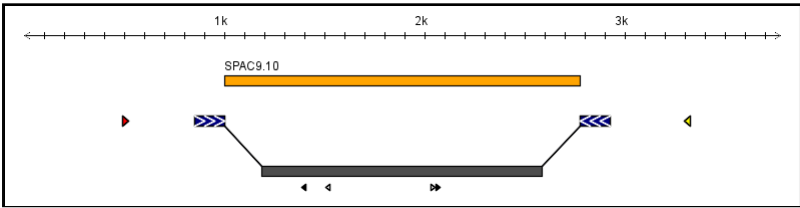

SPAC9.11

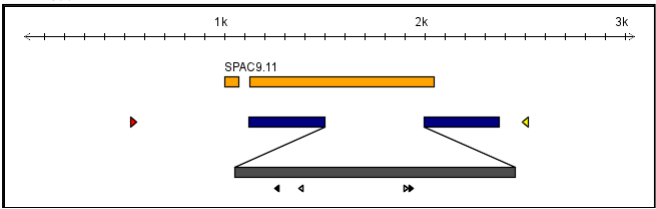

SPAC9.12c

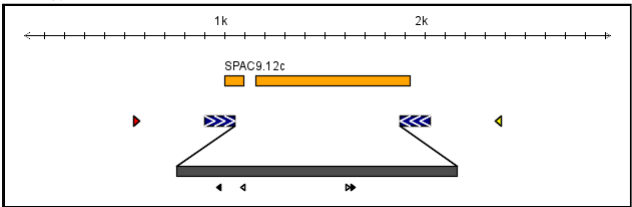

SPAC9.13c

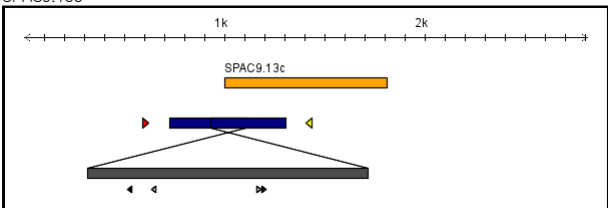

SPAC9E9.03

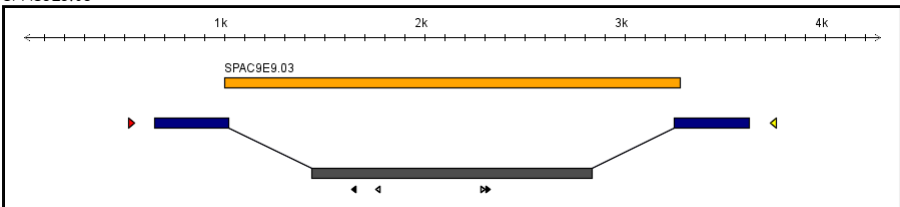

SPAC9E9.05

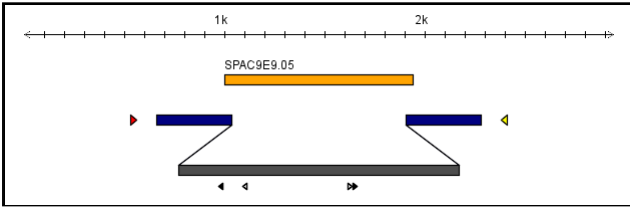

SPAC9E9.06c

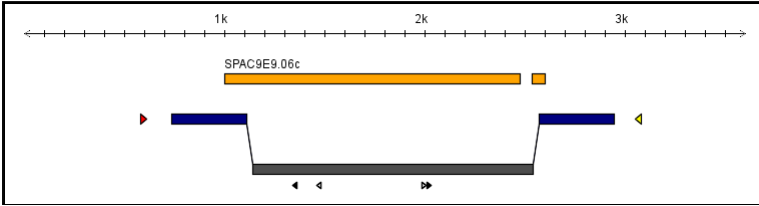

SPAC9E9.07c

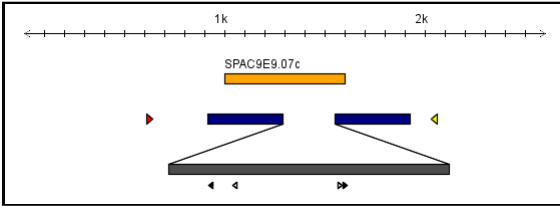

SPAC9E9.08

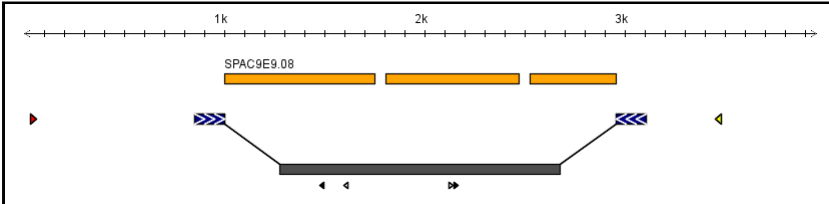

SPAC9E9.09c

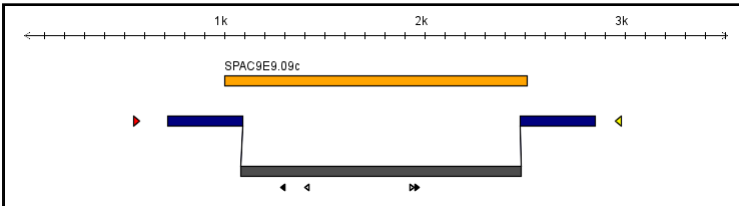

SPAC9E9.10c

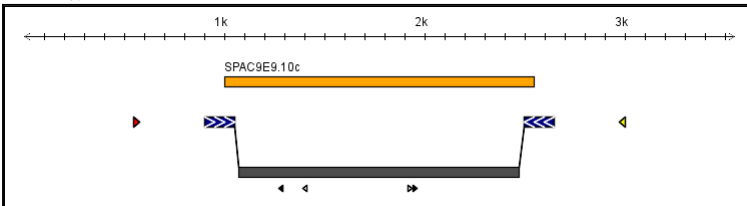

SPAC9E9.11

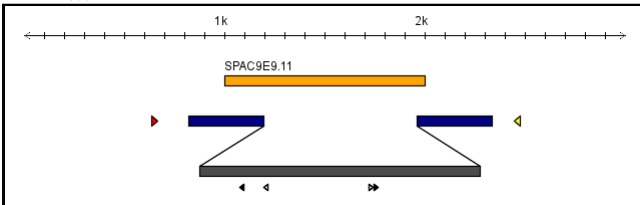

SPAC9E9.13

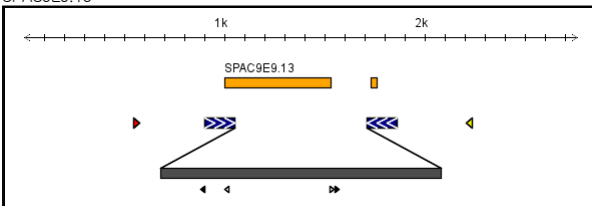

SPAC9E9.14

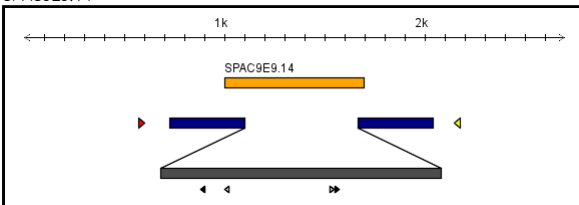

SPAC9E9.15

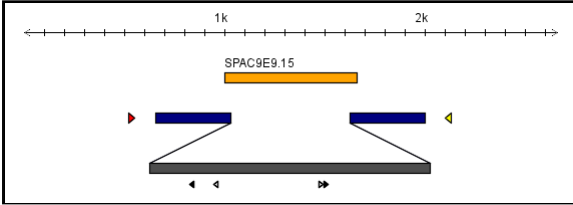

SPAC9G1.03c

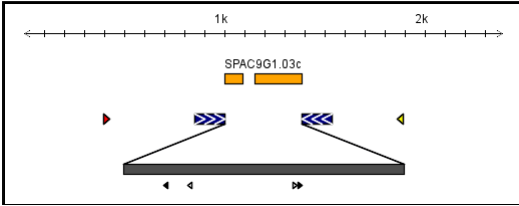

SPAC9G1.04

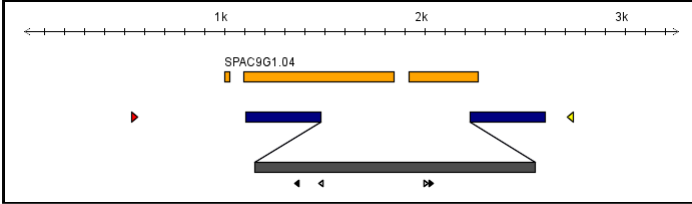

SPAC9G1.05

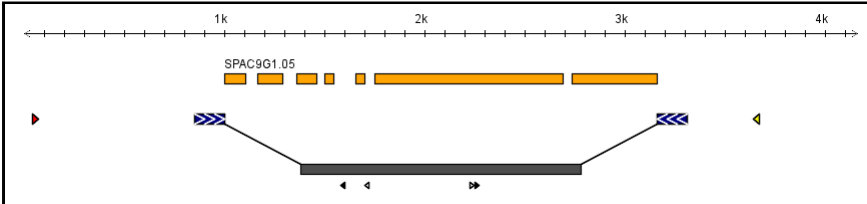

SPAC9G1.06c

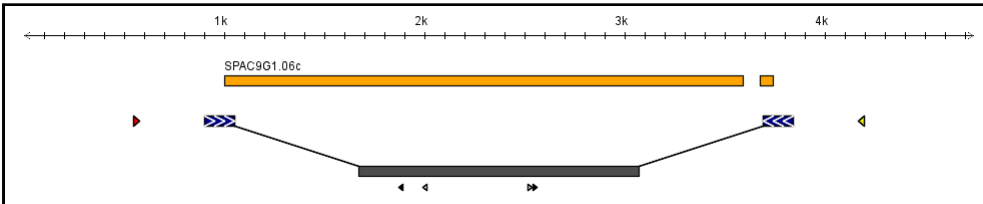

SPAC9G1.07

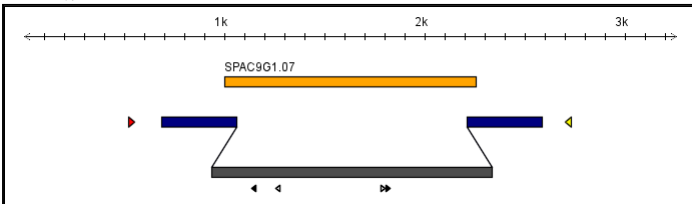

SPAC9G1.08c

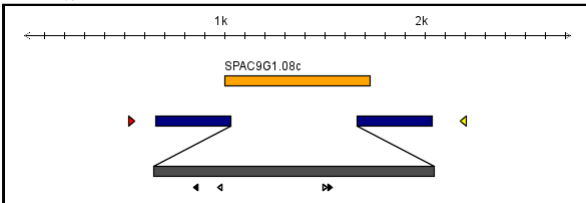

SPAC9G1.09

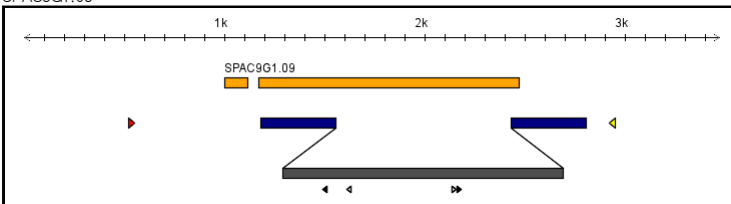

SPAC9G1.11c

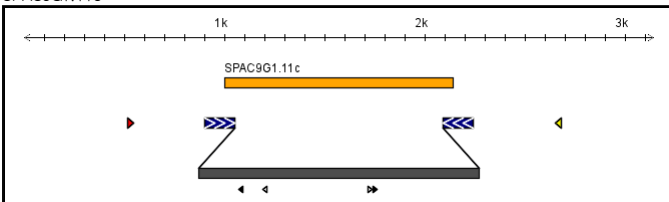

SPAC9G1.12

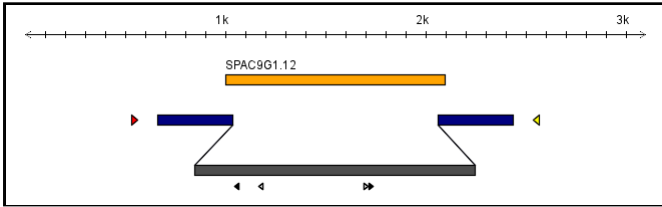

SPAC9G1.13c

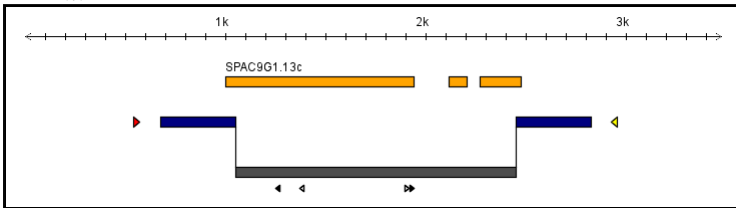

SPAC10F6.02c

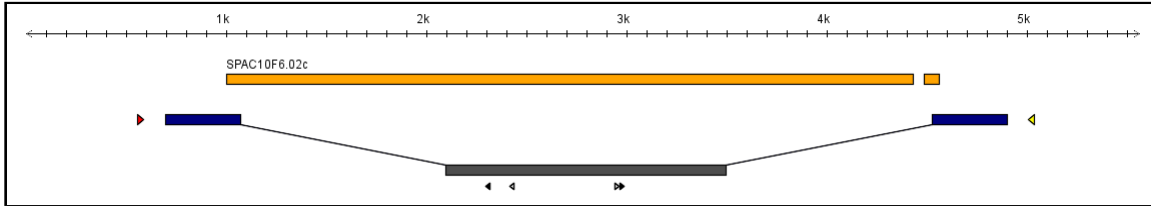

SPAC10F6.09c

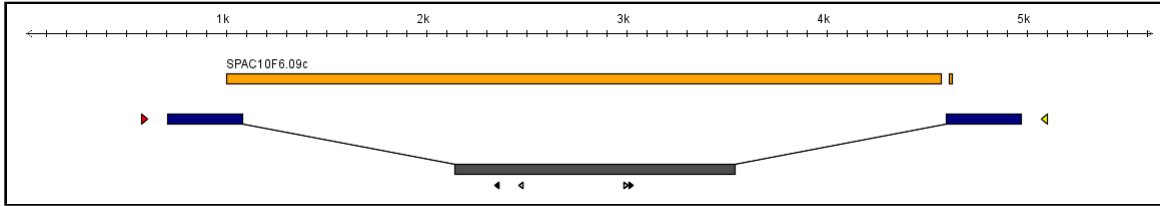

SPAC11D3.14c

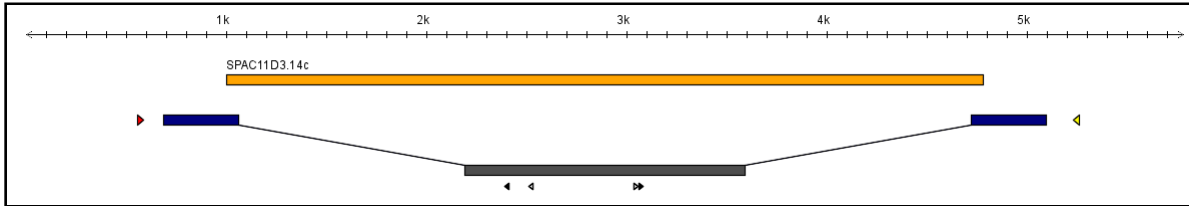

SPAC11D3.15

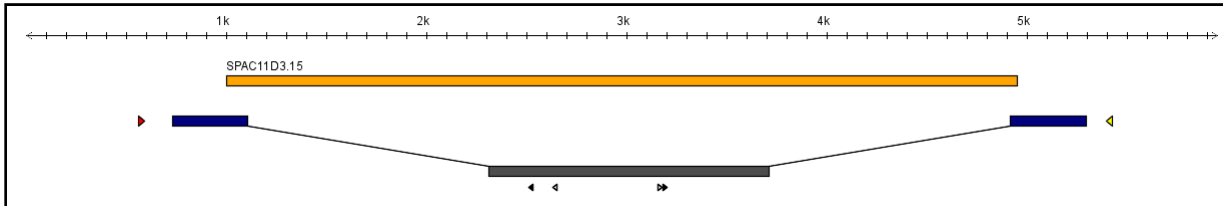

SPAC11E3.01c

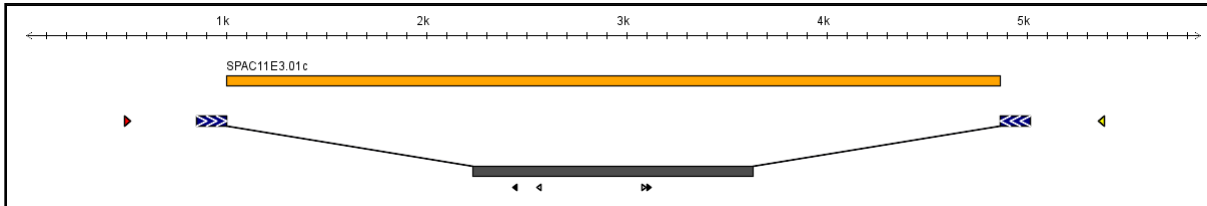

SPAC11E3.02c

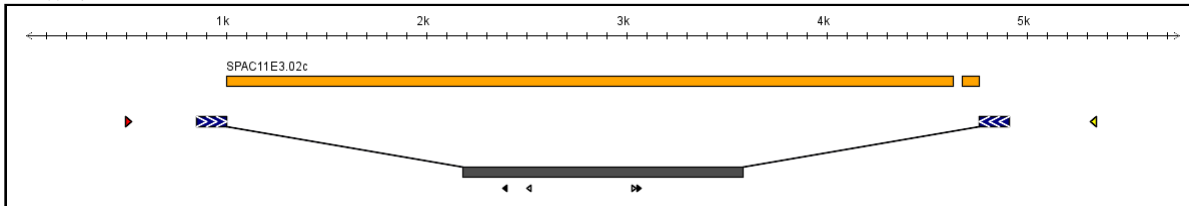

SPAC11E3.05

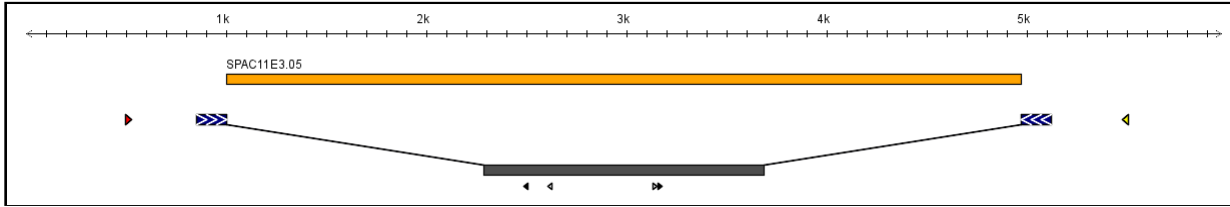

SPAC11E3.11c

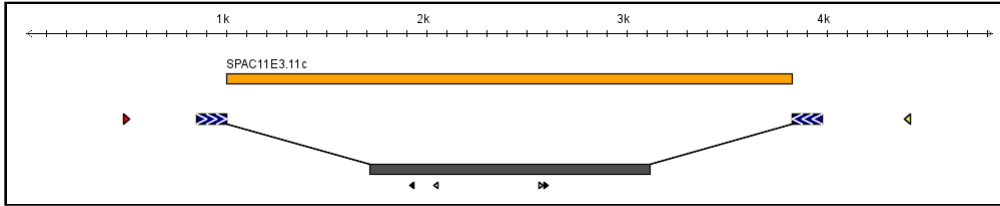

SPAC11G7.02

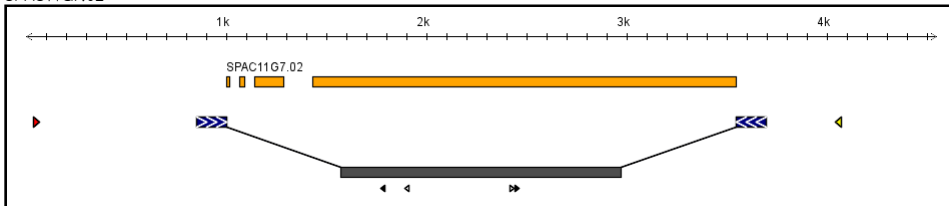

SPAC13G6.06c

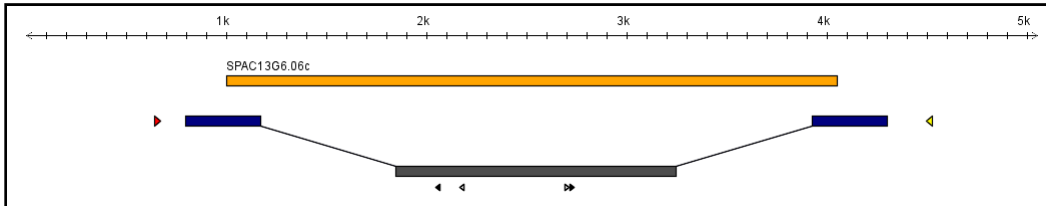

SPAC14C4.05c

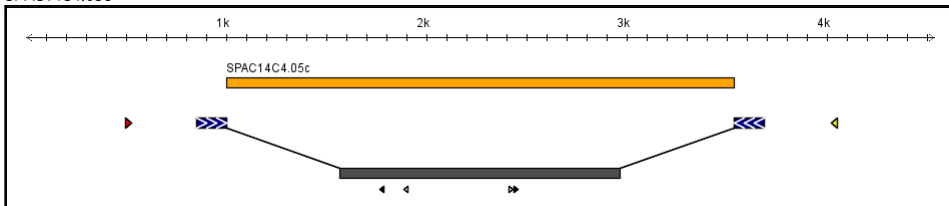

SPAC14C4.15c

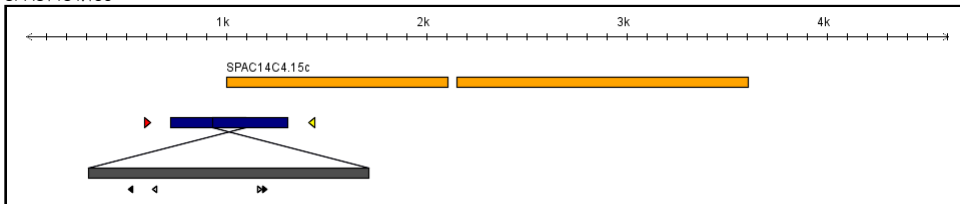



SPAC16C9.06c

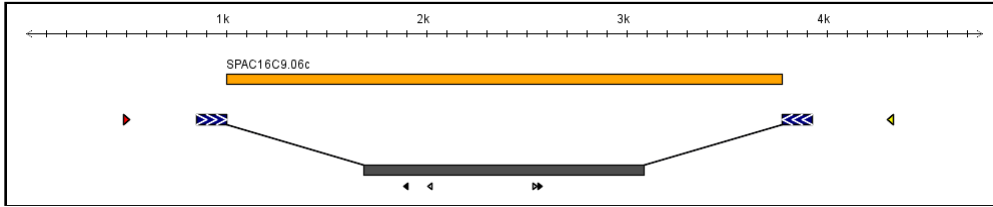

SPAC17A2.06c

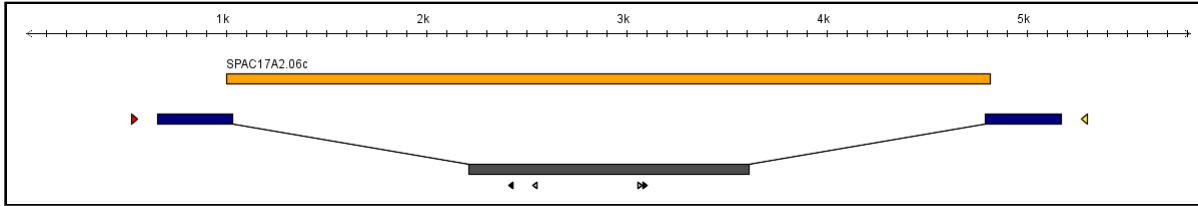

SPAC17A2.12

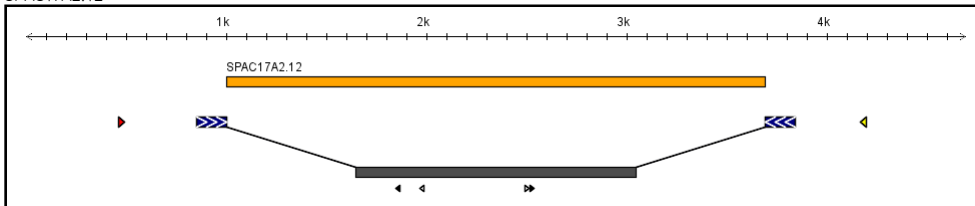

SPAC17A5.06

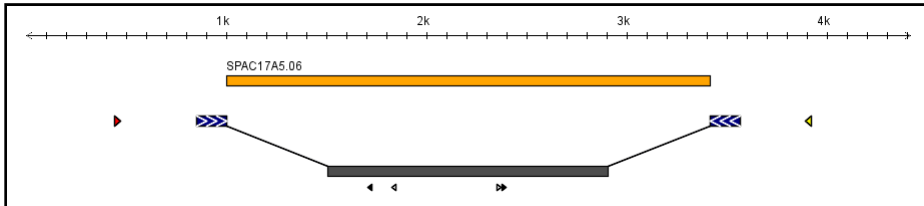

SPAC17A5.14

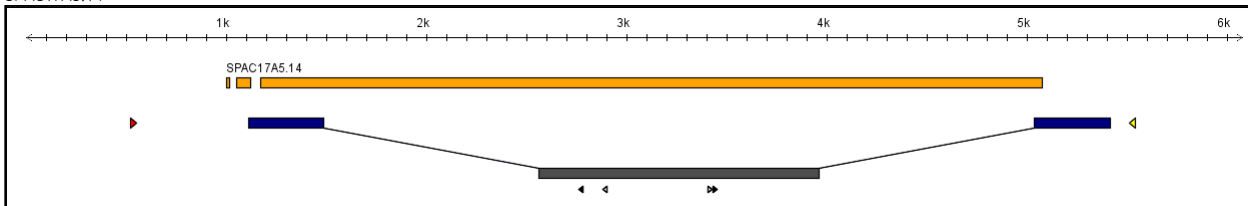

SPAC17A5.16

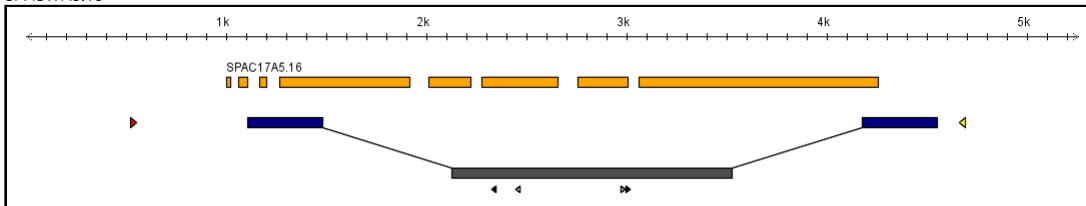

SPAC17C9.03

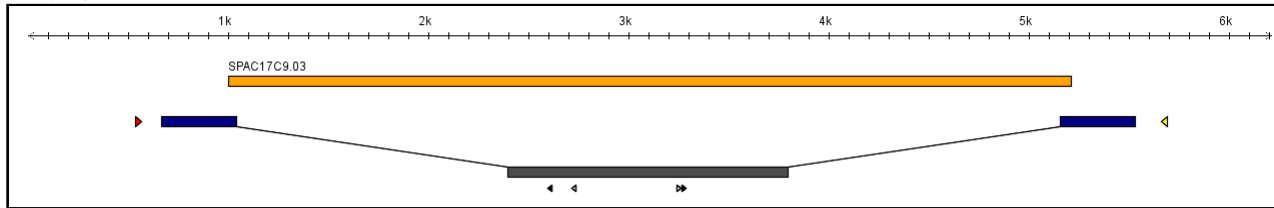

SPAC17G6.16c

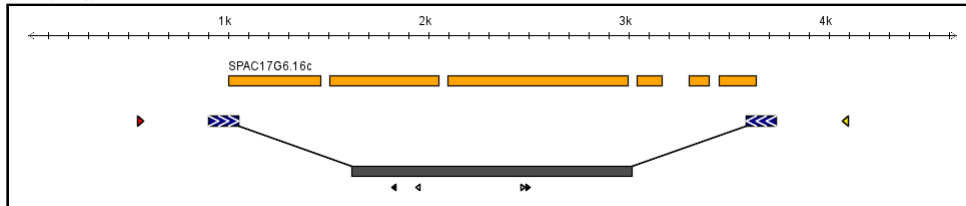

SPAC17G8.14c

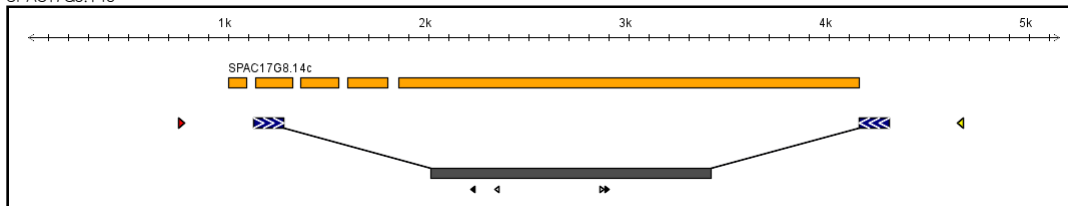

SPAC17H9.01

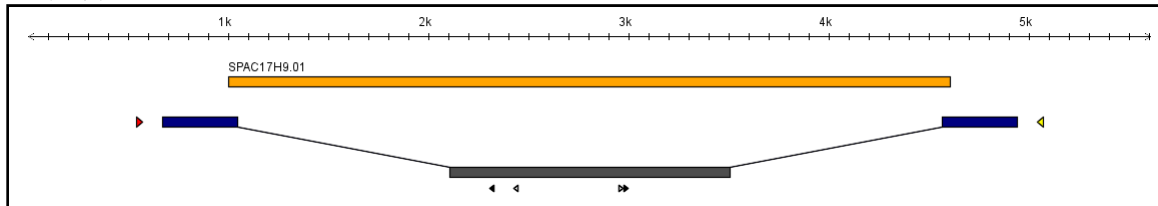

SPAC17H9.02

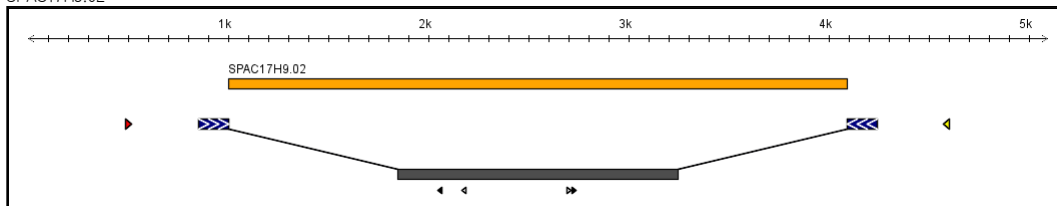

SPAC17H9.10c

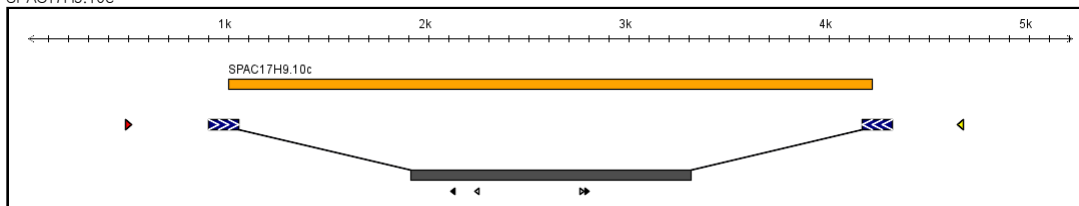

SPAC18B11.11

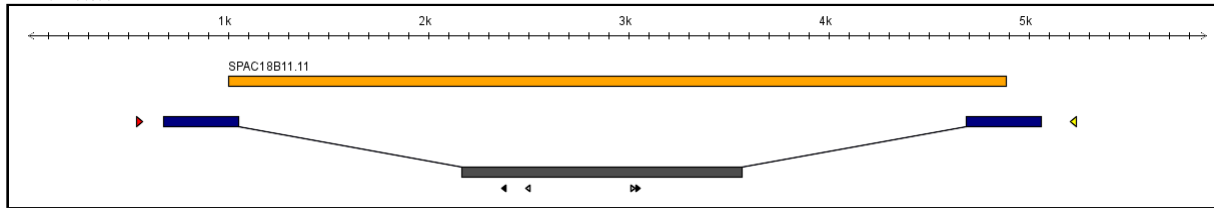

SPAC19A8.02

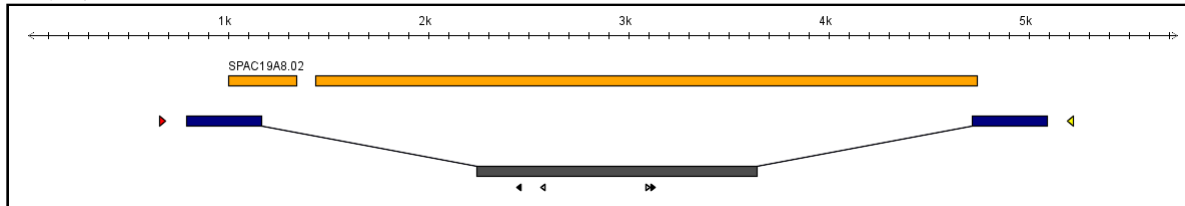

SPAC19G12.10c

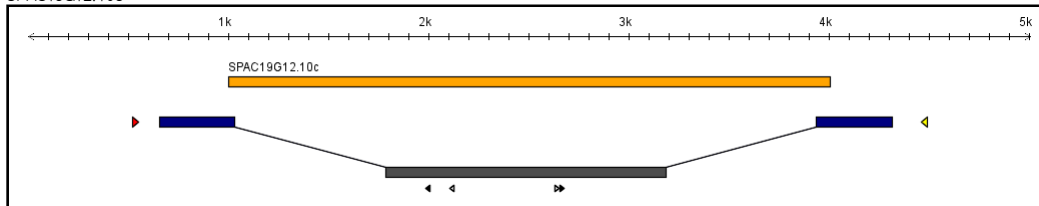

SPAC1D4.14

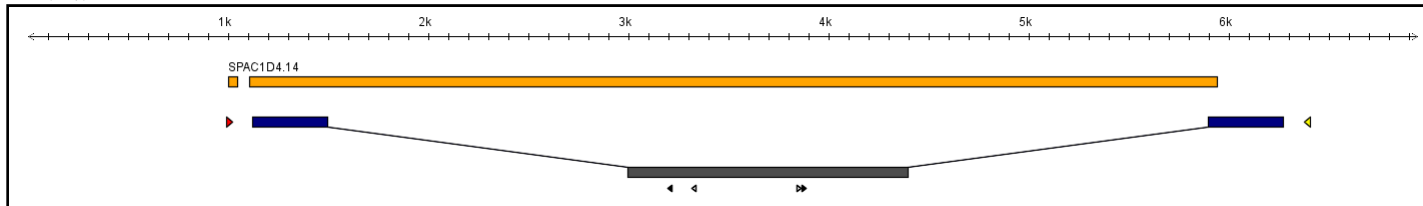

SPAC1F3.02c

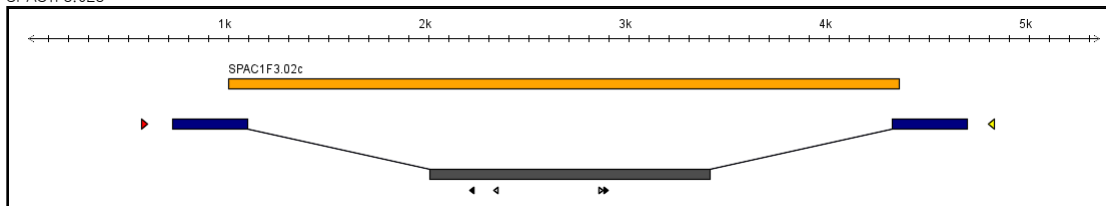

SPAC1F7.01c

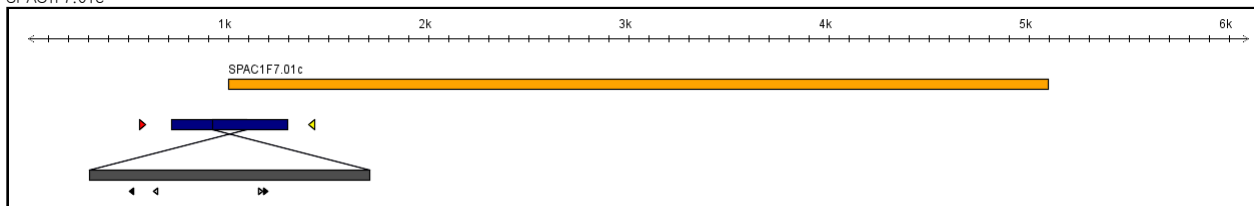

SPAC20G4.02c

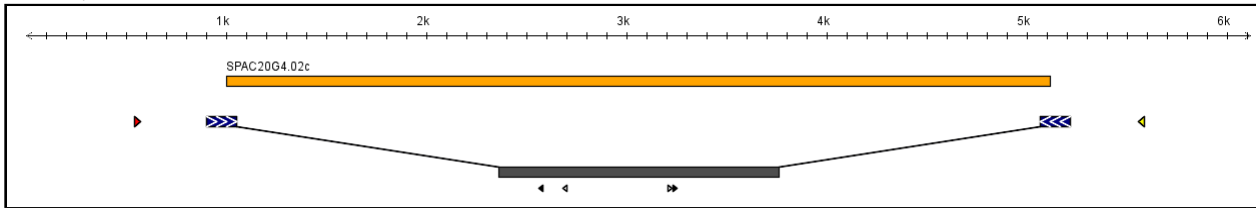

SPAC20G8.06

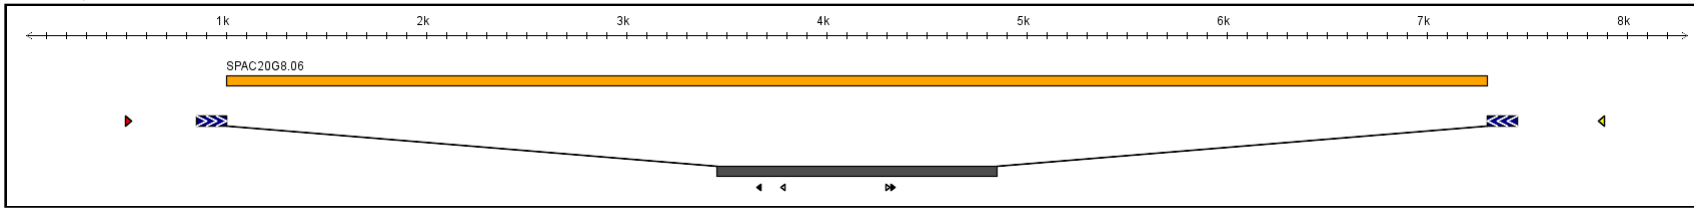

SPAC20G8.08c

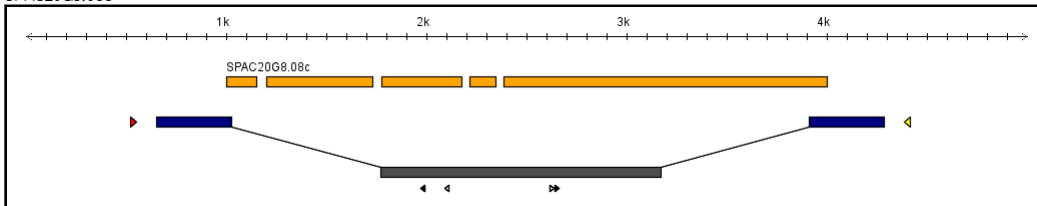

SPAC20G8.09c

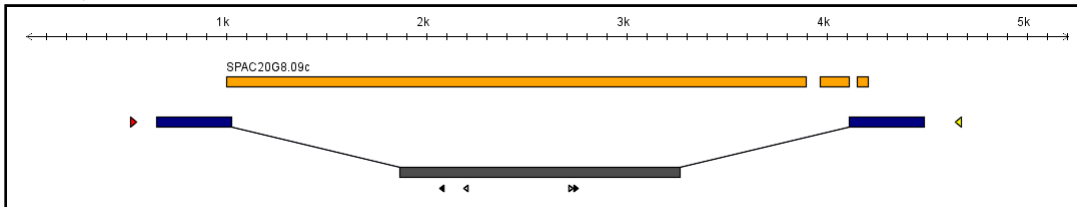

SPAC2C4.07c

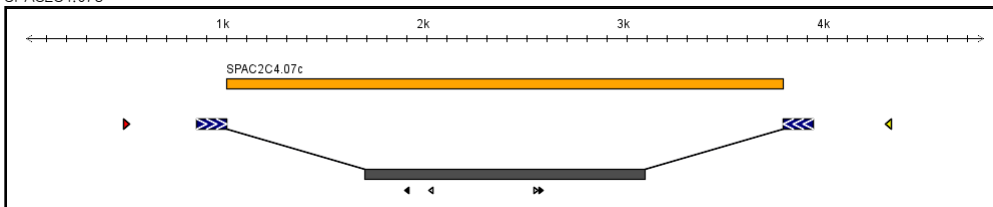

SPAC2F3.06c

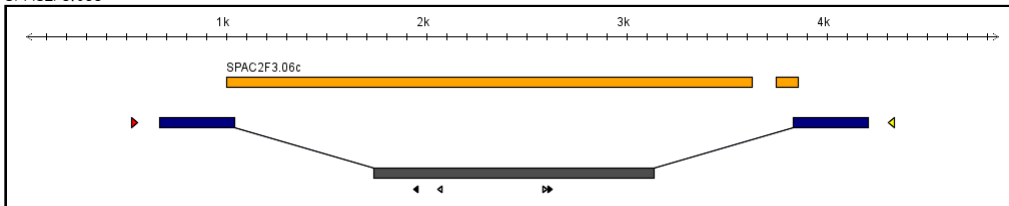

SPAC2G11.02

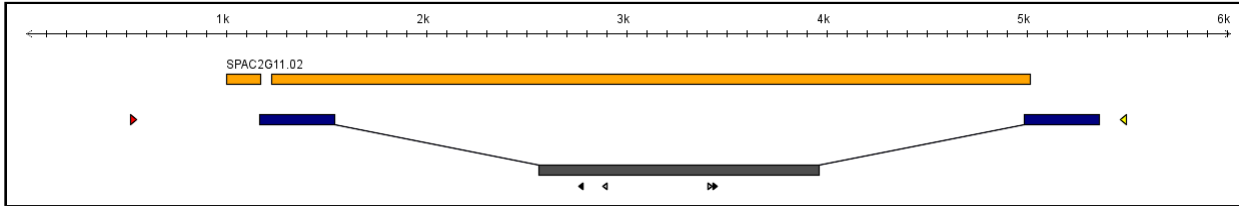

SPAC2G11.12

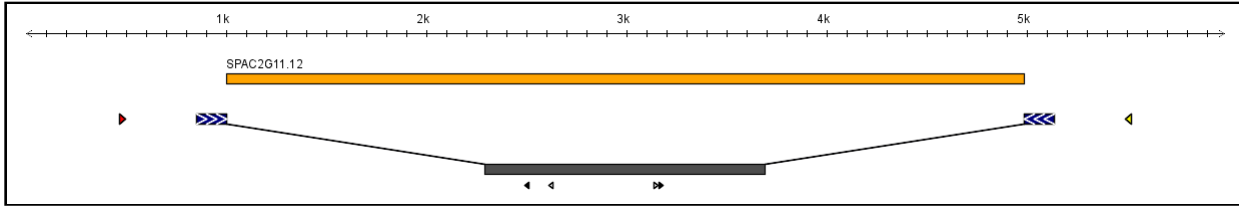

SPAC3A12.05c

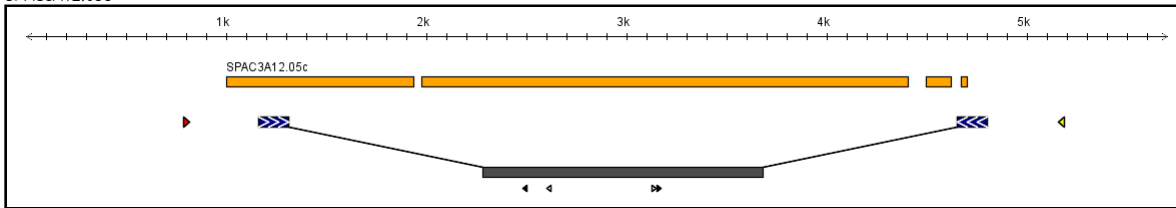

SPAC3C7.08c

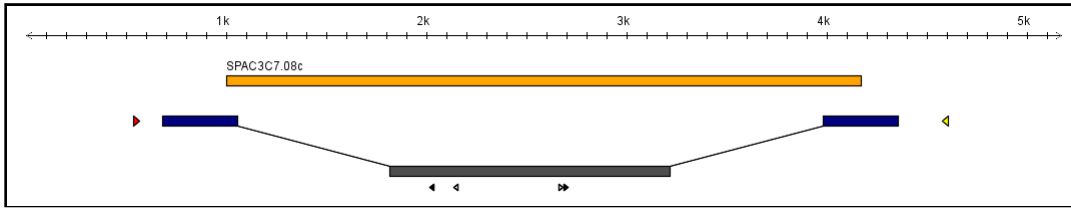

SPAC3F10.02c

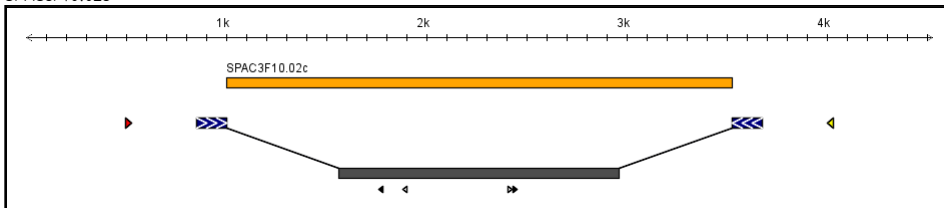

SPAC3F10.11c

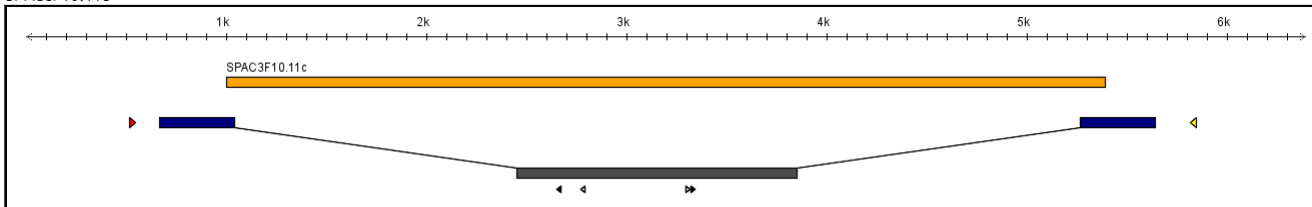

SPAC3G6.01

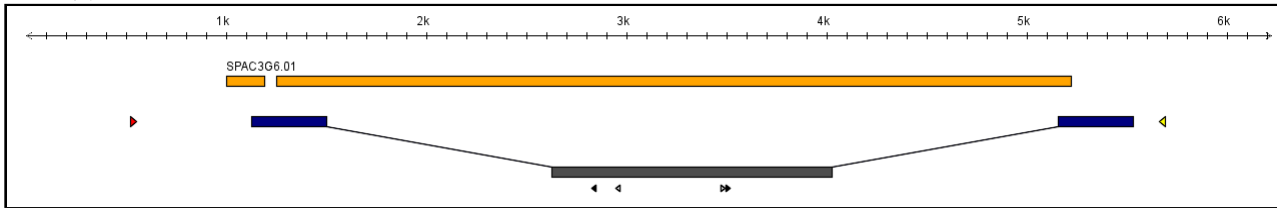

SPAC3G6.11

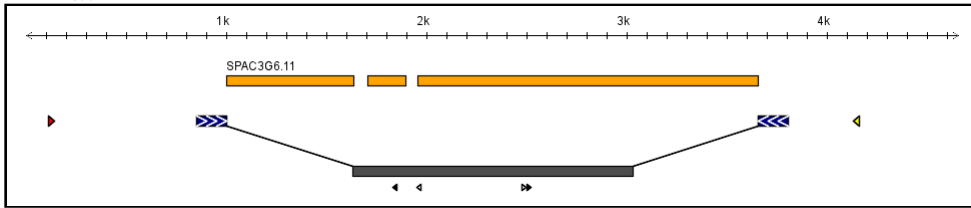

SPAC3G9.12

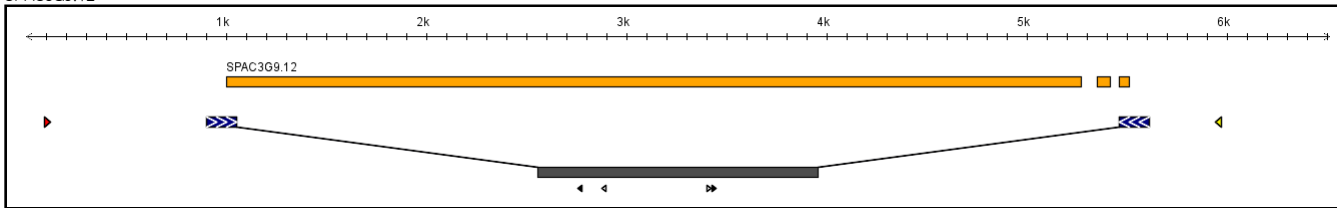

SPAC3H1.02c

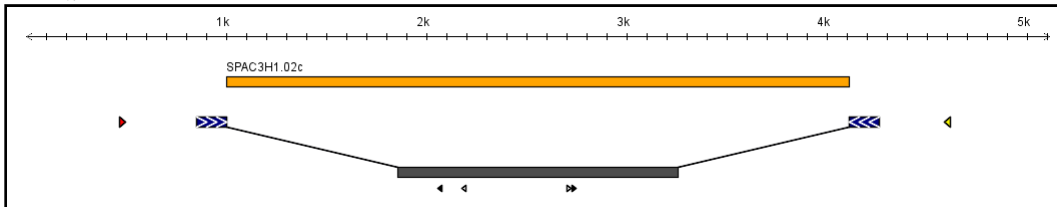

SPAC3H1.12c

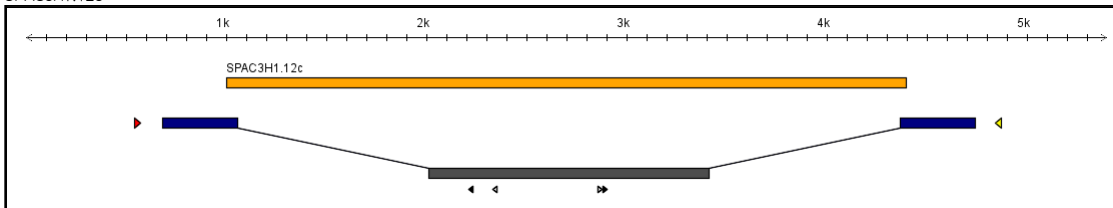

SPAC3H5.06c

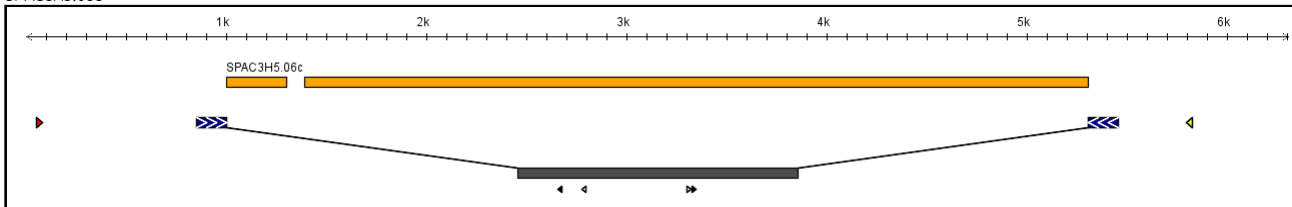

SPAC3H8.05c

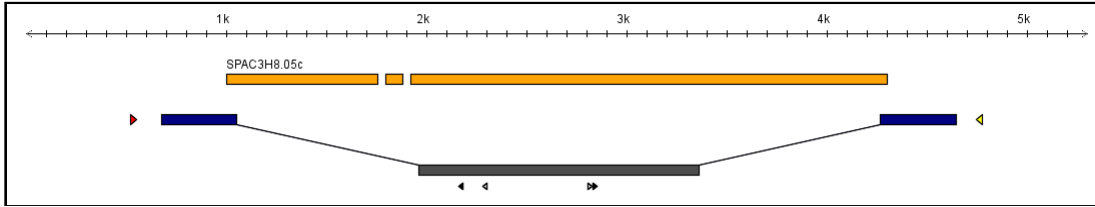

SPAC4A8.08c

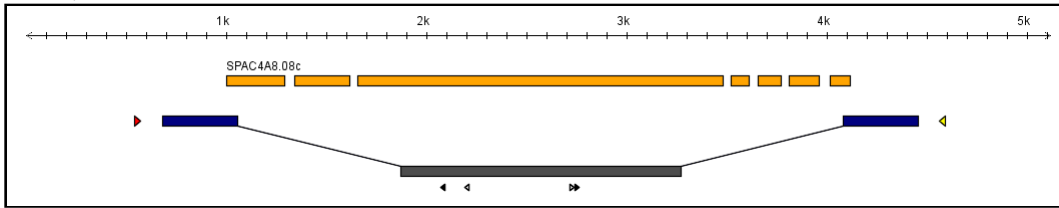

SPAC4D7.01c

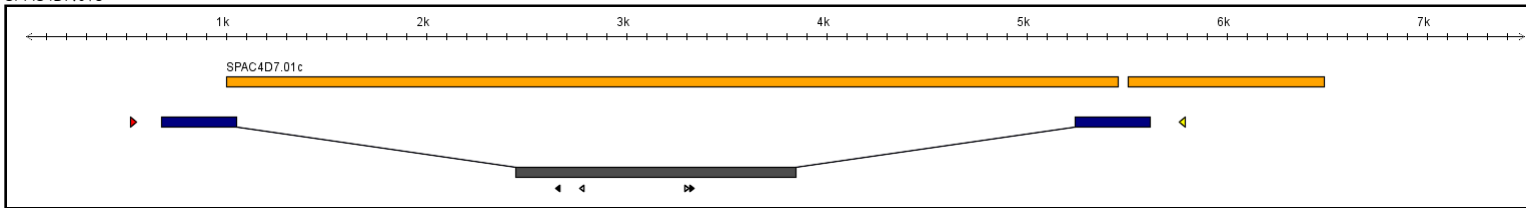

SPAC4F10.16c

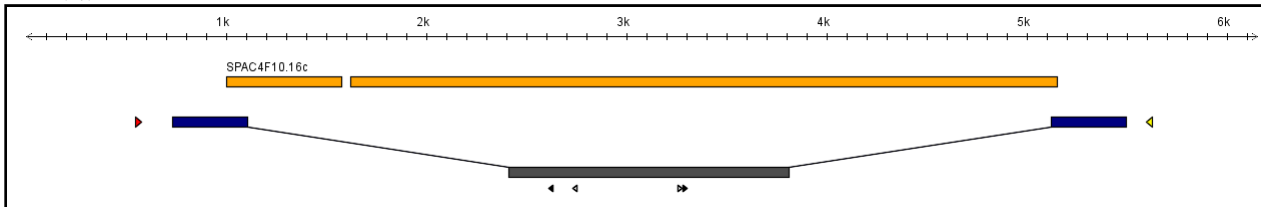

SPAC4F8.13c

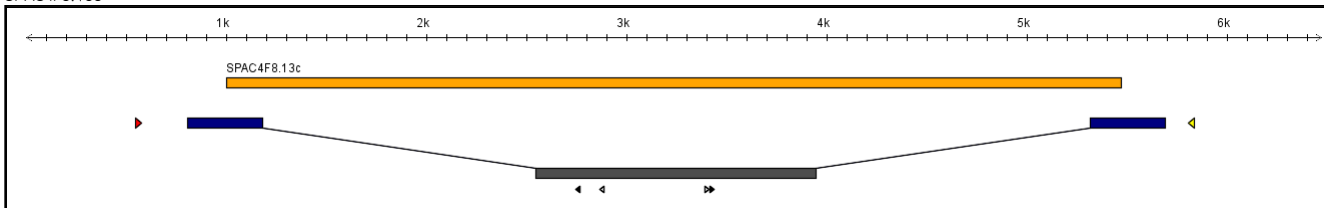

SPAC4G9.08c

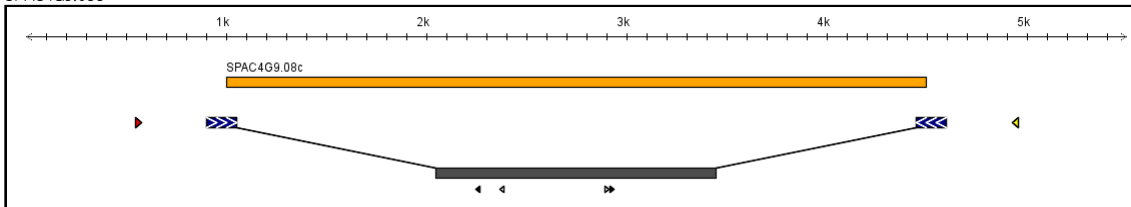

SPAC6C3.06c

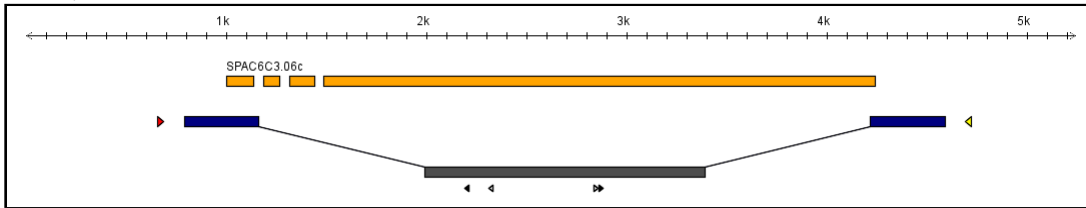

SPAC6F12.09

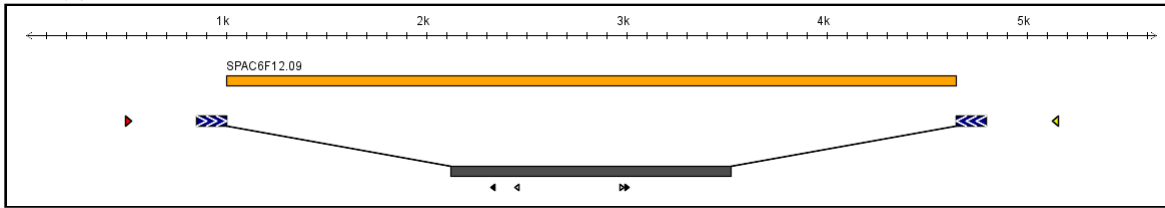

SPAC6F12.16c

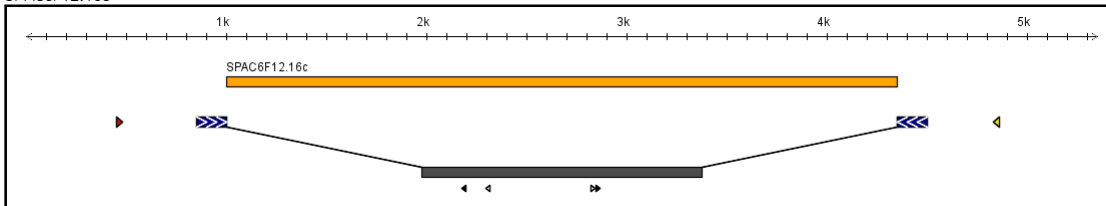

SPAC6F6.06c

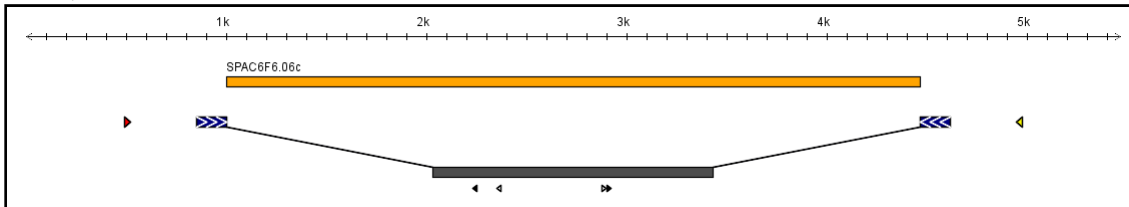

SPAC6G10.02c

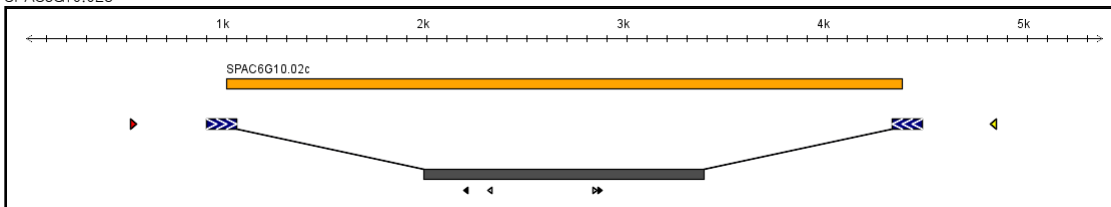

SPAC6G10.05c

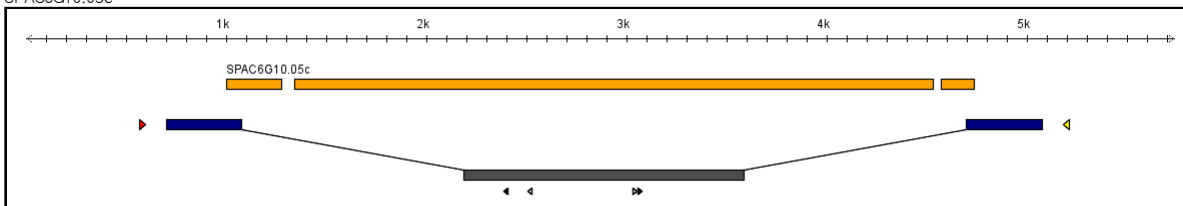



SPAC6G9.04

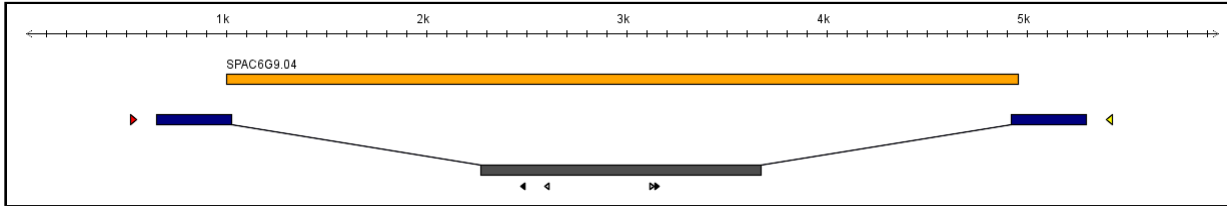

SPAC6G9.06c

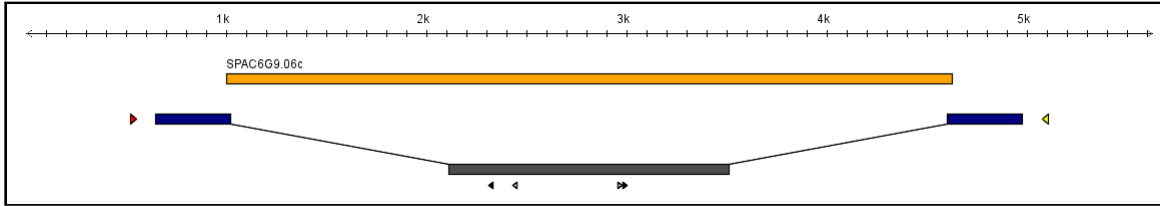

SPAC6G9.10c

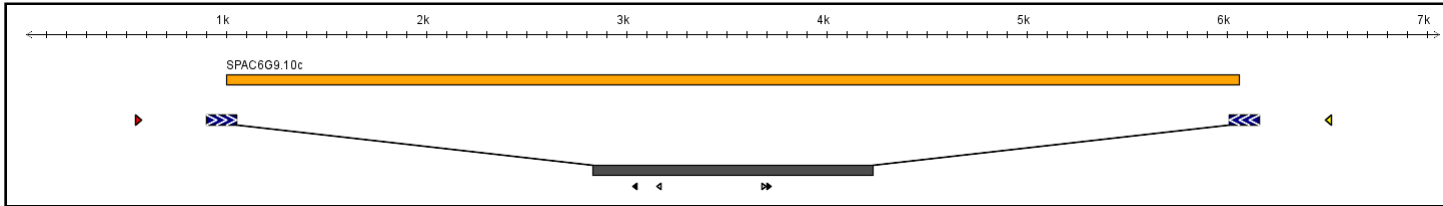

SPAC9E9.12c

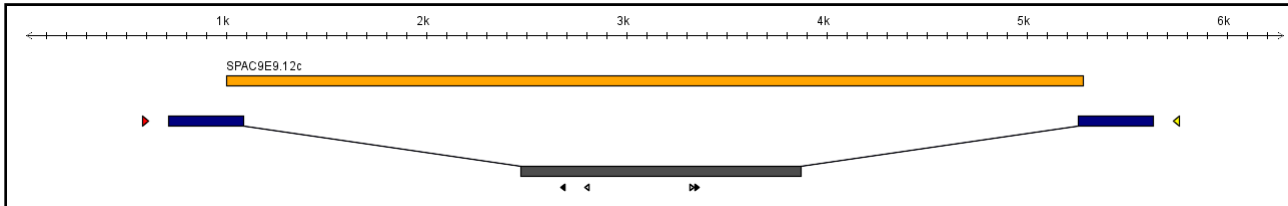

SPAC9G1.02

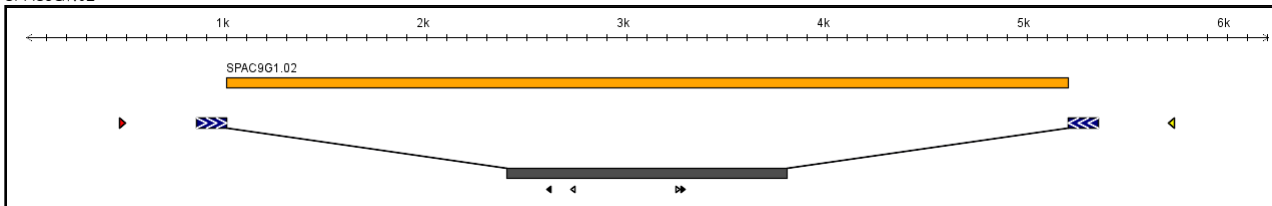

SPAC9G1.10c

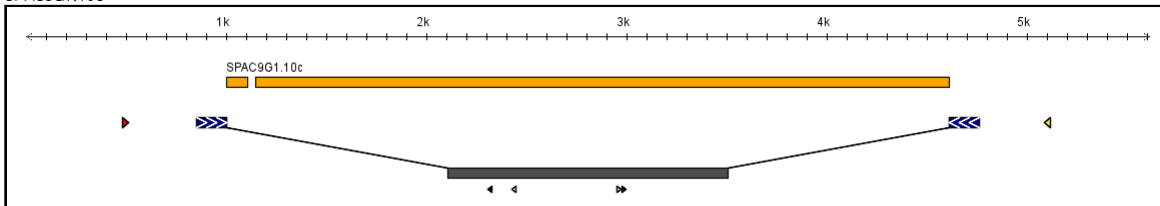

SPAC15A10.11

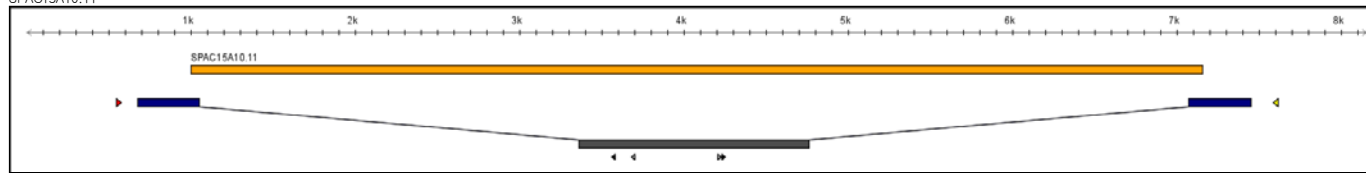

SPAC18G6.05c

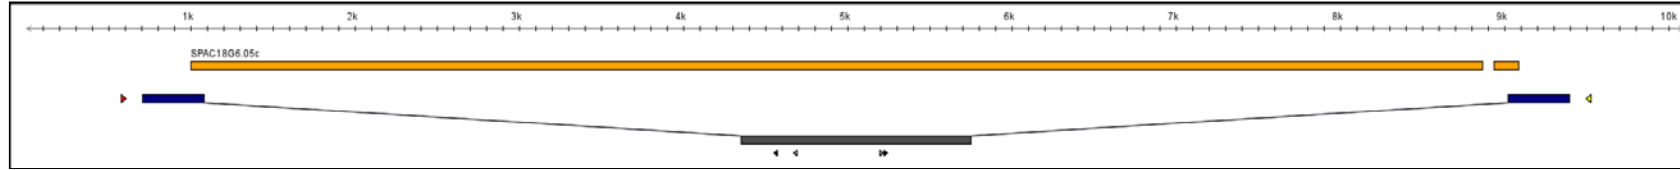

SPAC19B12.03

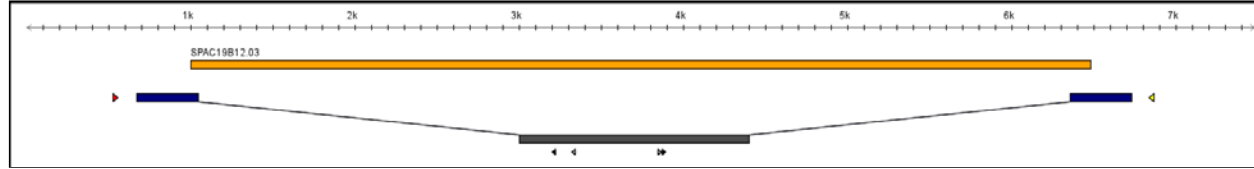

SPAC19D5.04

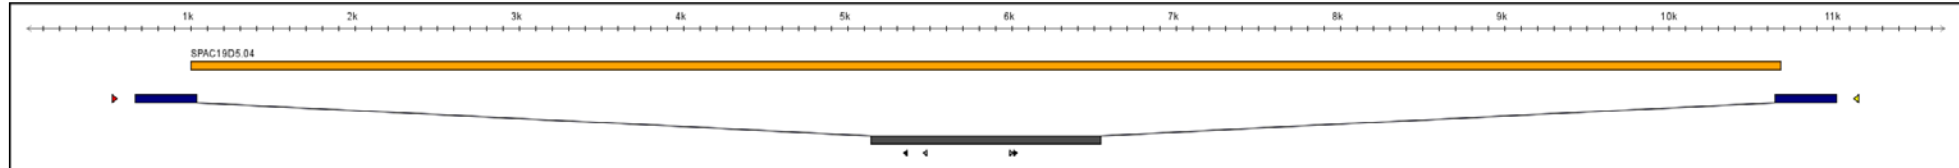

SPAC1F3.06c

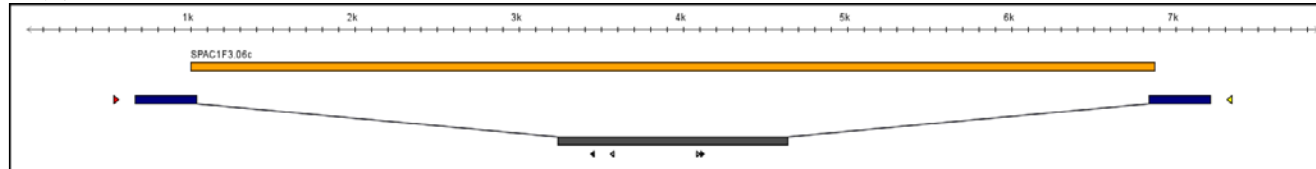

SPAC1F5.04c

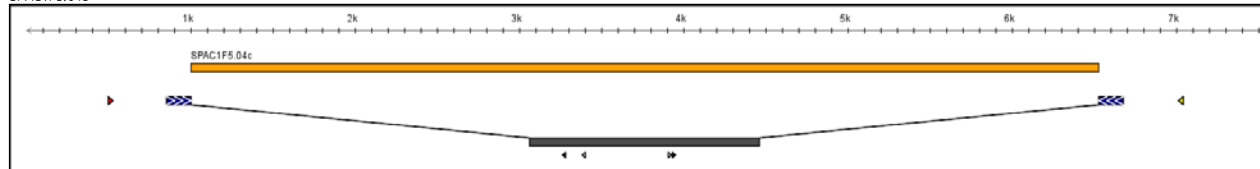

SPAC1F5.11c

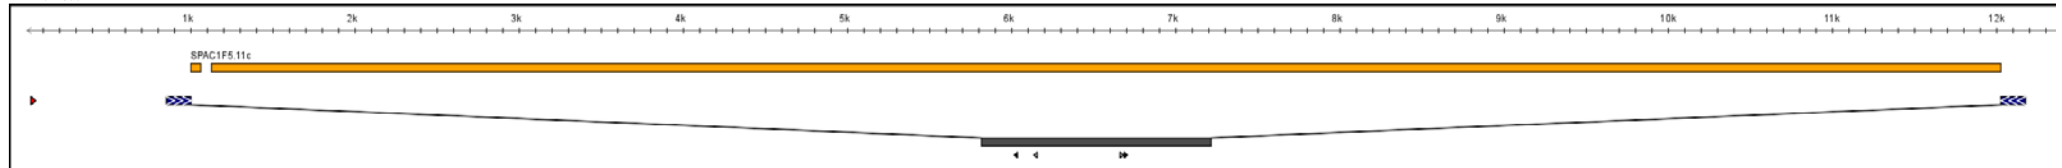

SPAC3H5.09c

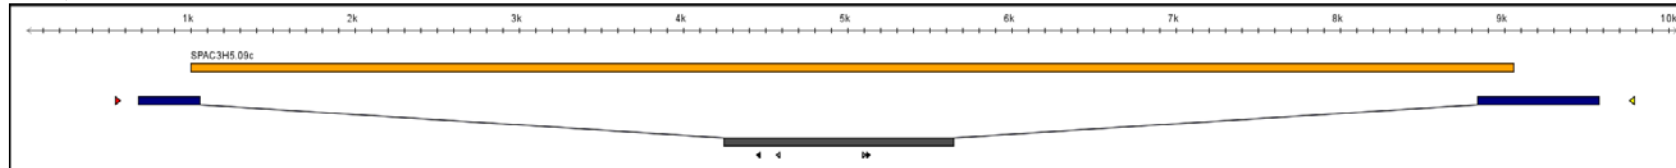

SPAC4A8.05c

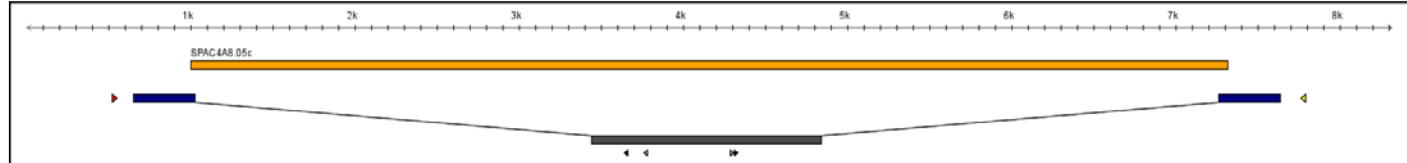

SPAC4A8.11c

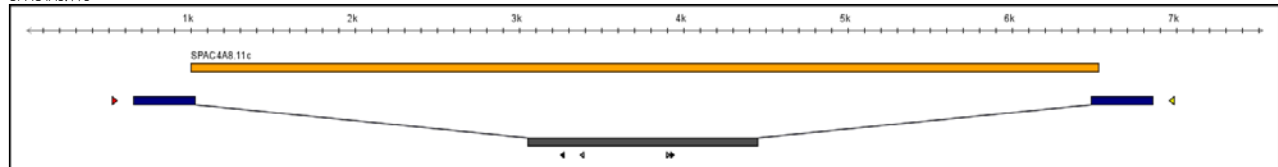

SPAC4F8.12c

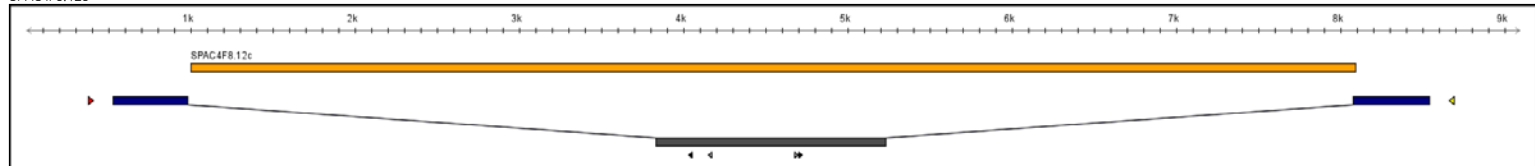

SPAC6B12.02c

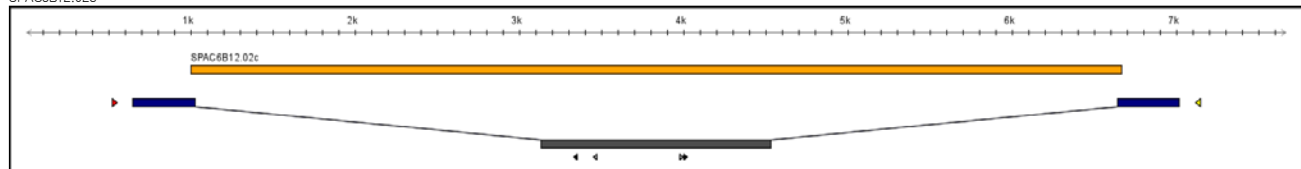

SPAC6F6.01

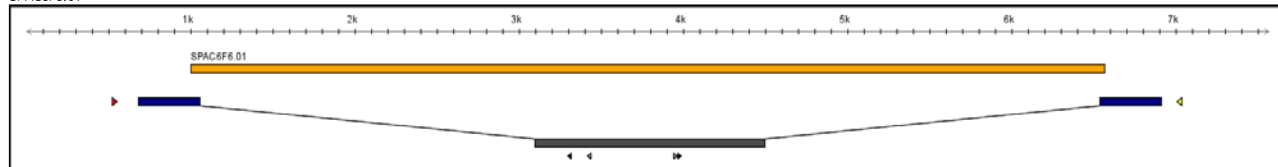

SPAC9.03c

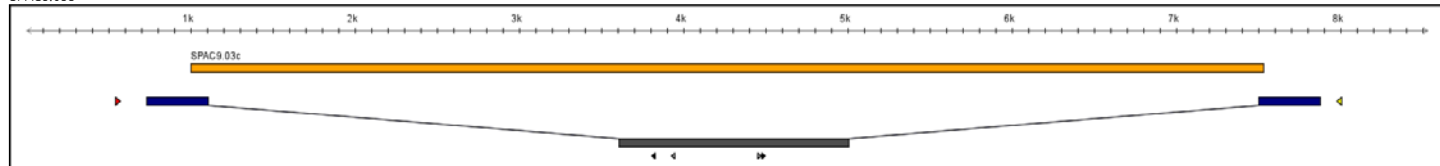

SPAC1002.01

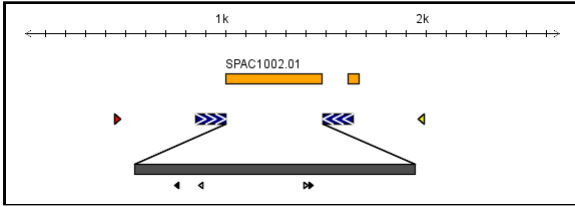

SPAC1002.02

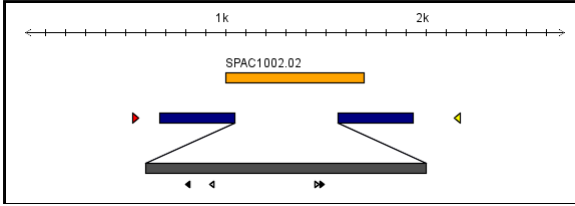

SPAC1002.03c

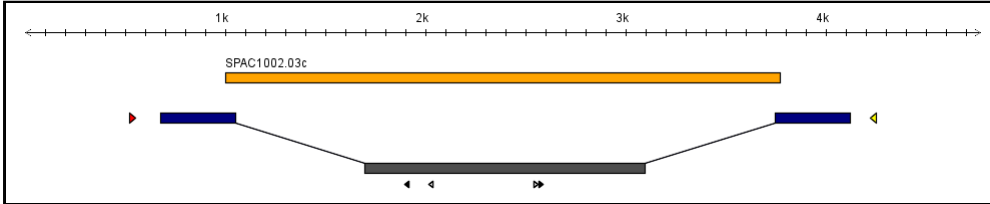

SPAC1002.04c

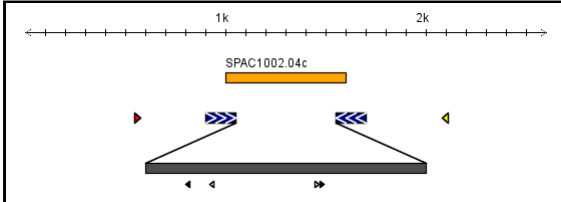

SPAC1002.05c

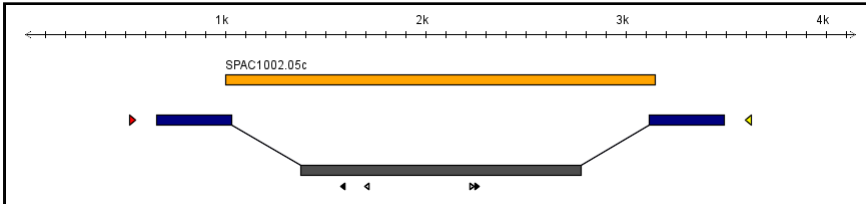

SPAC1002.06c

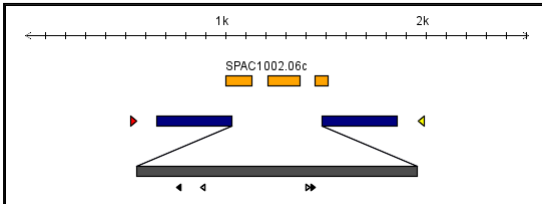

SPAC1002.07c

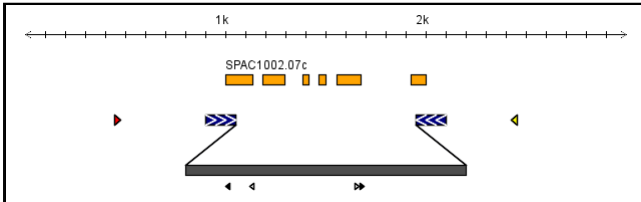

SPAC1002.08c

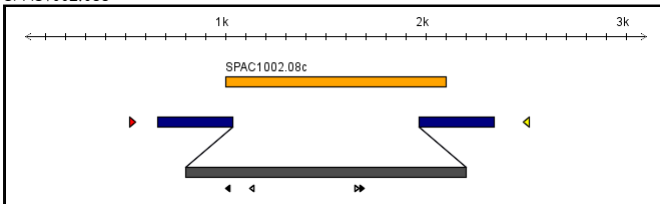

SPAC1002.09c

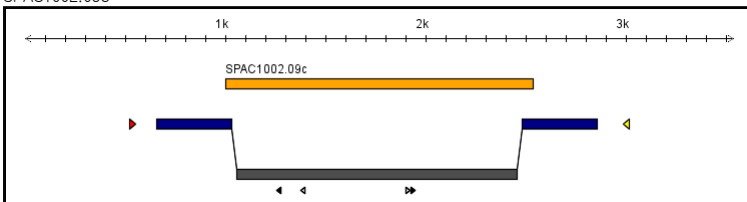

SPAC1002.10c

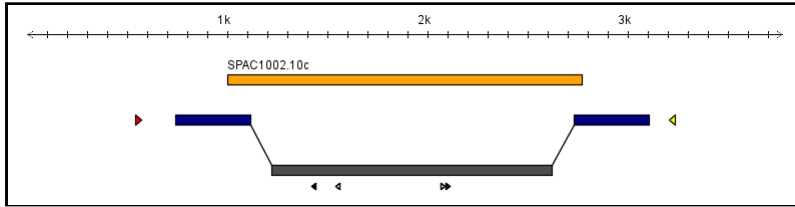

SPAC1002.11

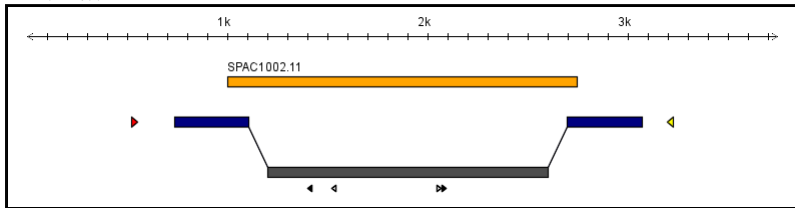

SPAC1002.12c

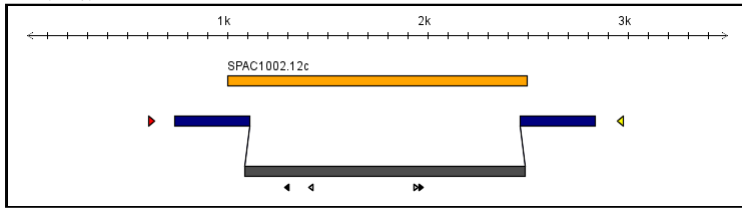

SPAC1002.13c

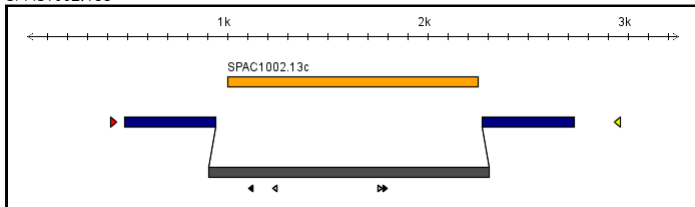

SPAC1002.14

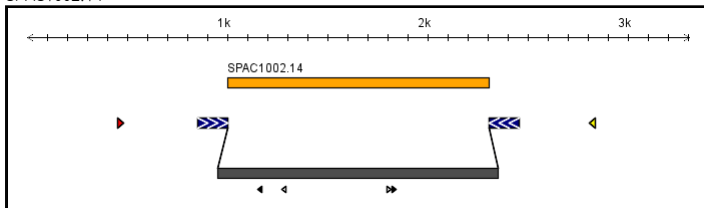

SPAC1002.15c

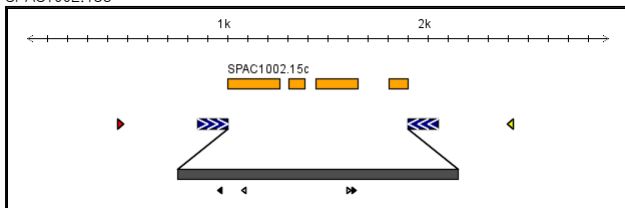

SPAC1002.16c

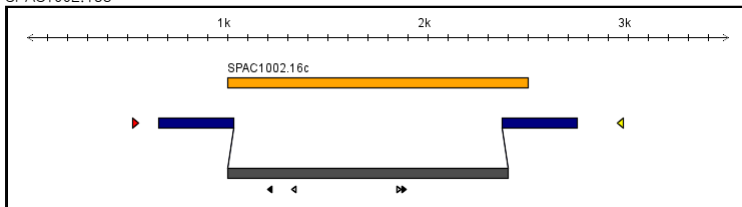

SPAC1002.17c

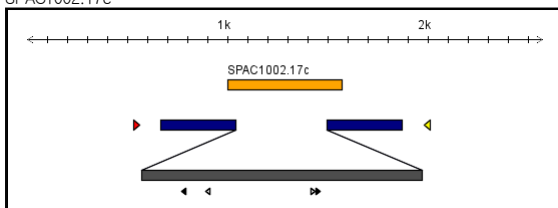

SPAC1002.18

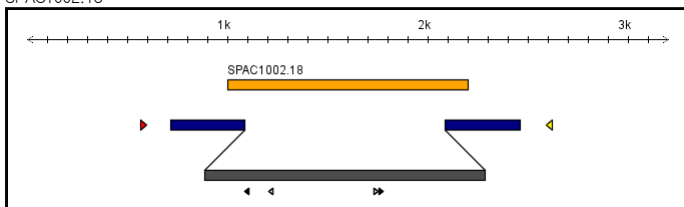

SPAC1002.19

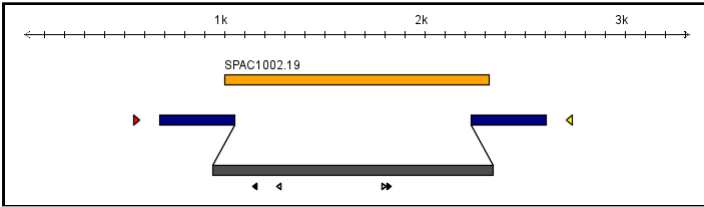

SPAC1002.20

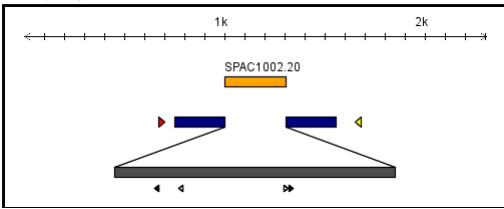

SPAC1006.01

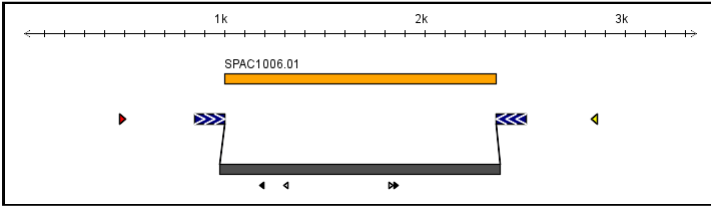

SPAC1006.02

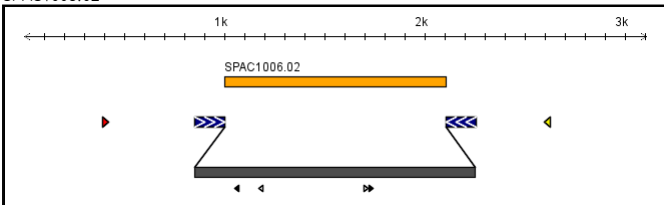

SPAC1006.04c

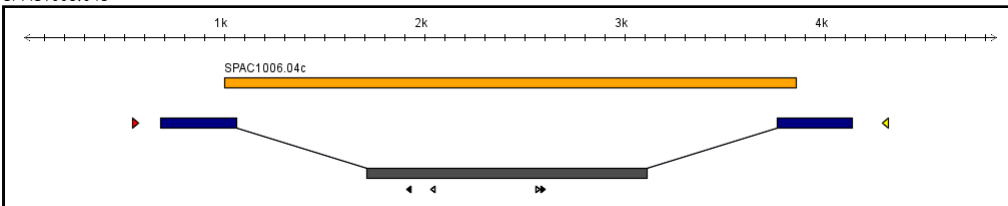

SPAC1006.05c

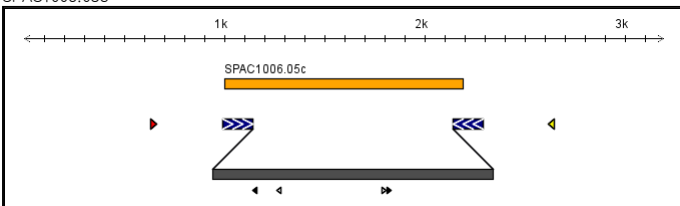

SPAC1006.07

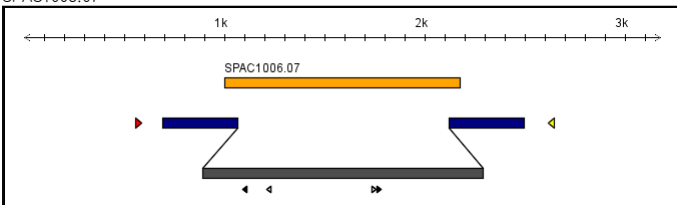

SPAC1006.08

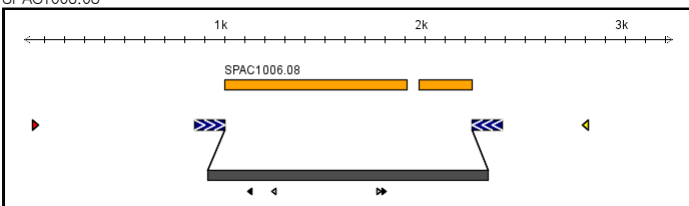

SPAC1006.09

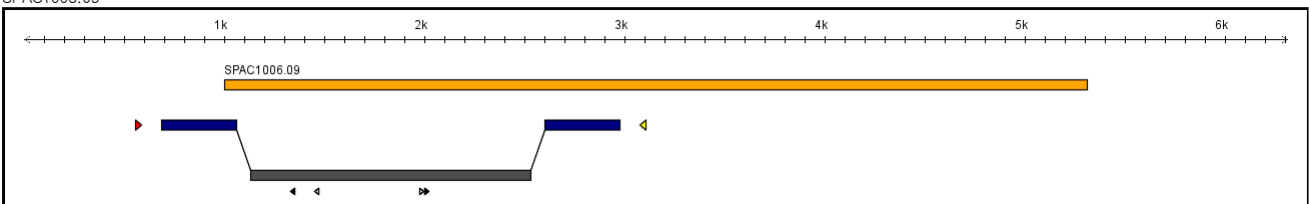

SPAC1039.01

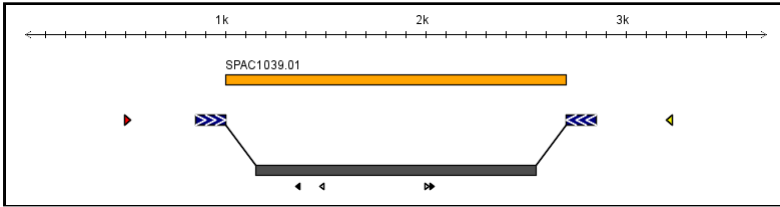

SPAC1039.02

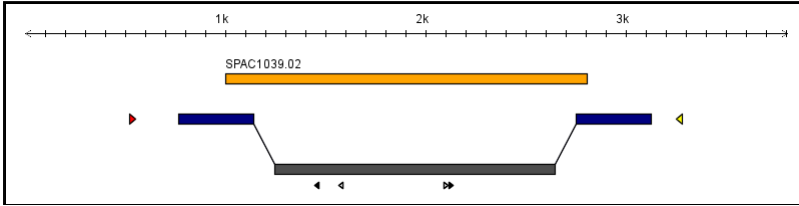

SPAC1039.03

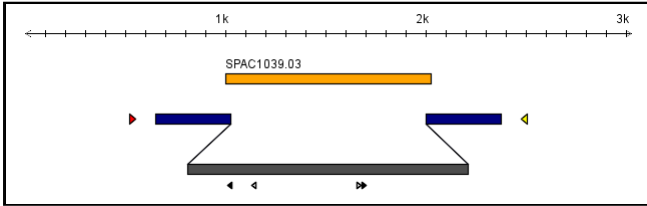

SPAC1039.04

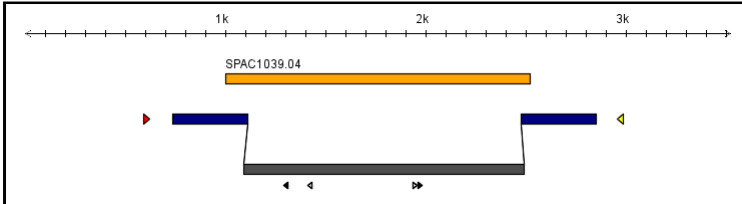

SPAC1039.05c

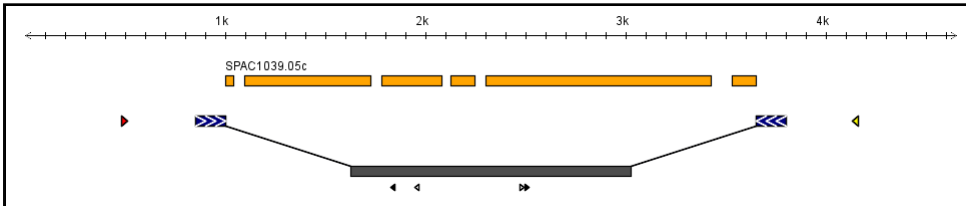

SPAC1039.06

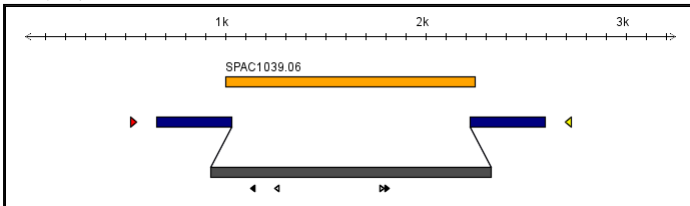

SPAC1039.07c

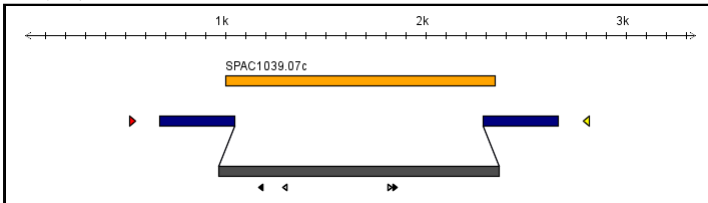

SPAC1039.08

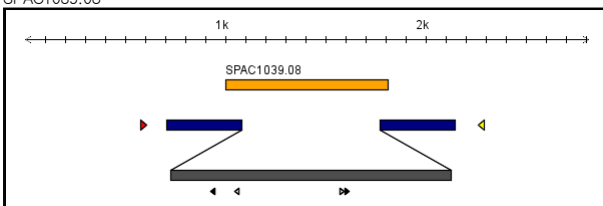

SPAC1039.09

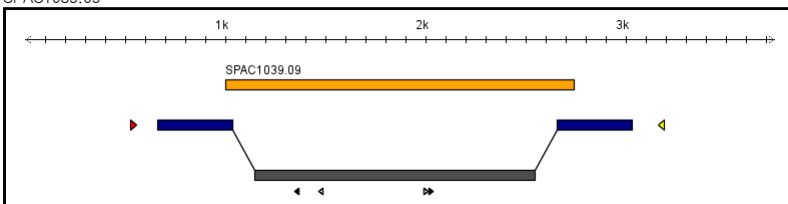

SPAC1039.10

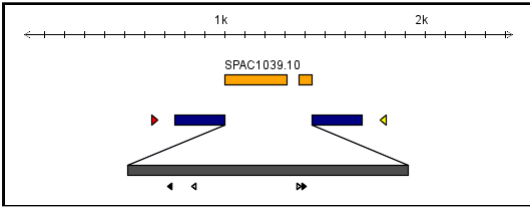

SPAC105.01c

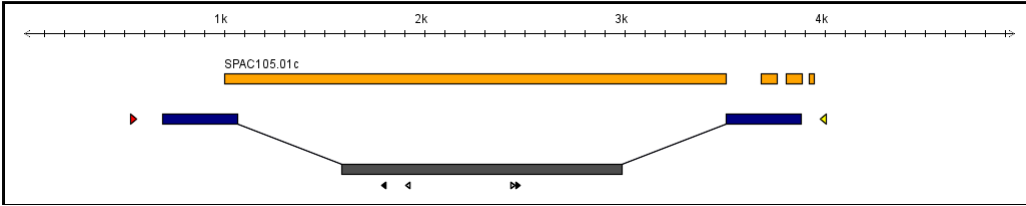

SPAC105.02c

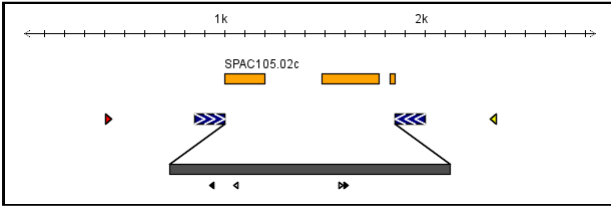

SPAC1071.01c

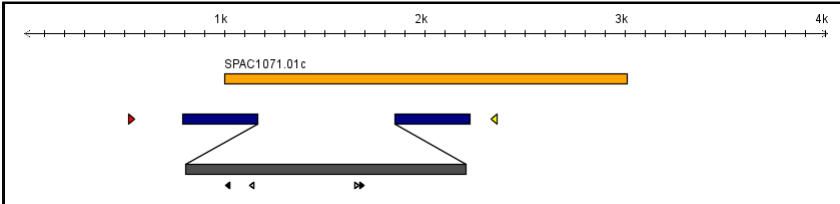

SPAC1071.03c

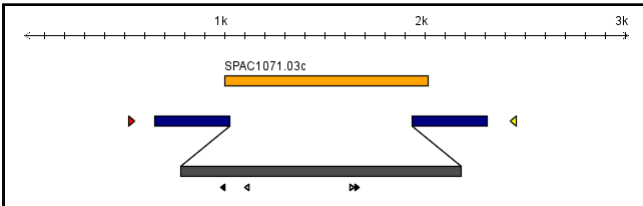

SPAC1071.04c

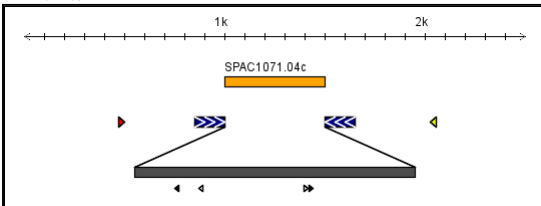

SPAC1071.05

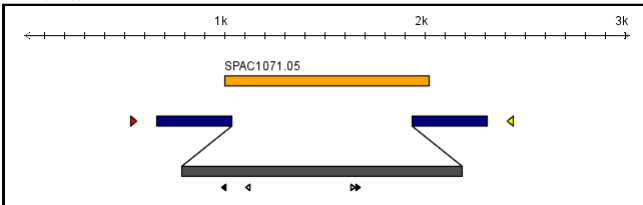

SPAC1071.06

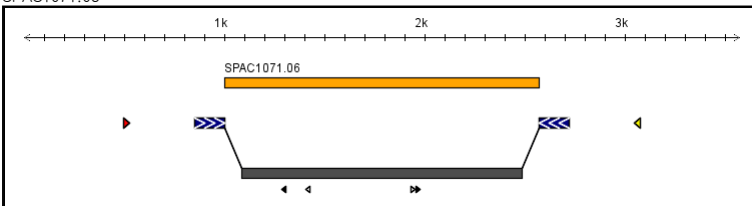

SPAC1071.07c

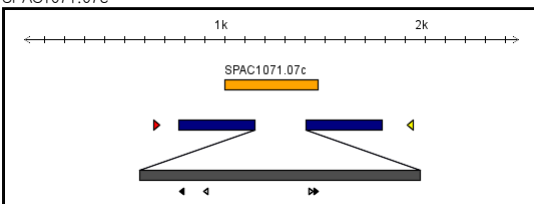



SPAC1071.08

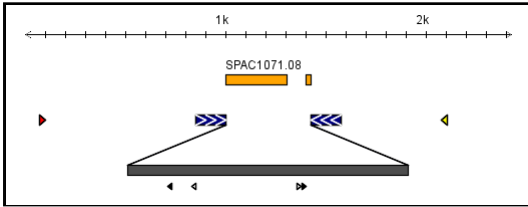

SPAC1071.09c

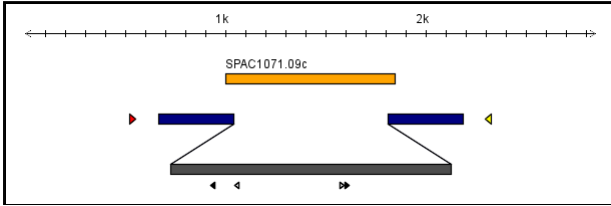

SPAC1071.10c

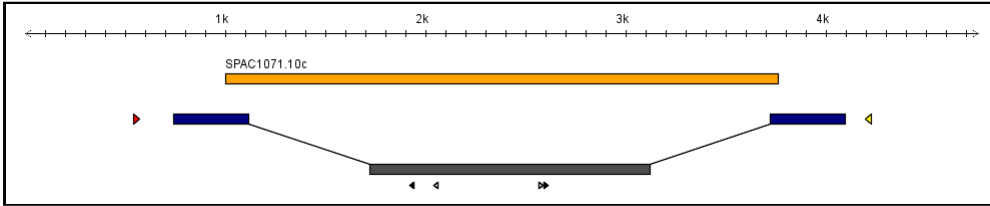

SPAC1071.11

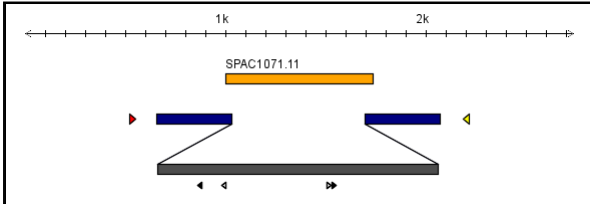

SPAC1071.12c

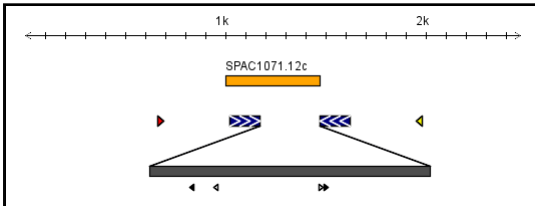

SPAC1093.01

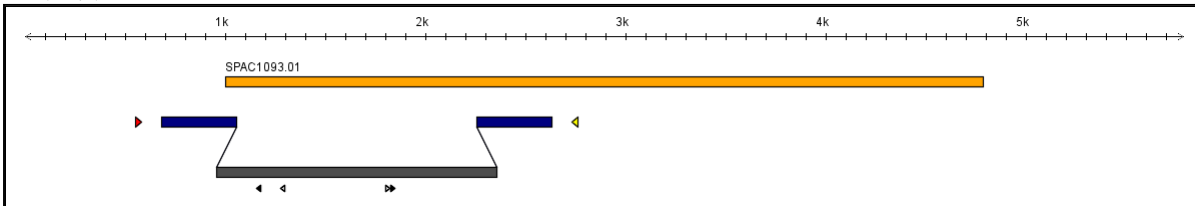

SPAC1093.02

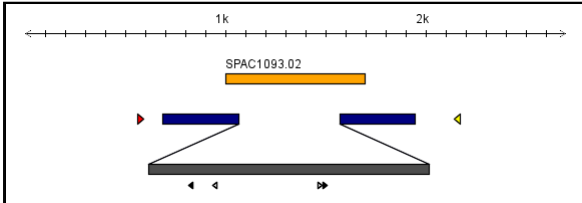

SPAC1093.03

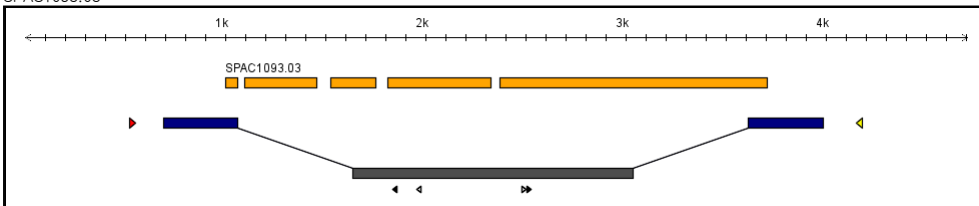

SPAC1093.04c

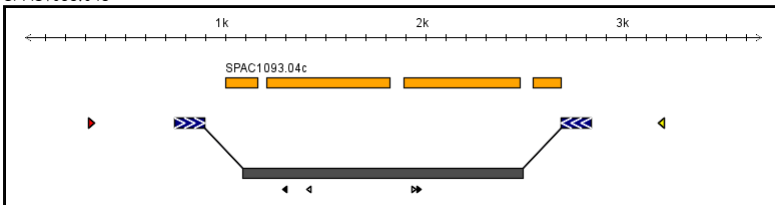

SPAC1093.05

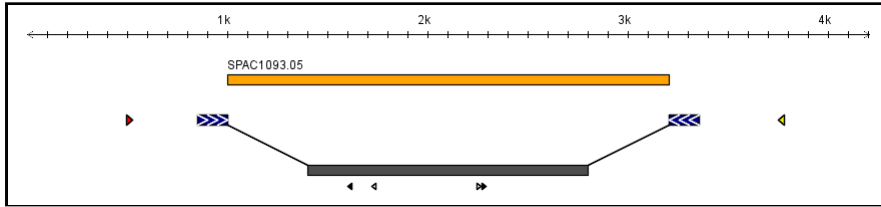

SPAC110.01

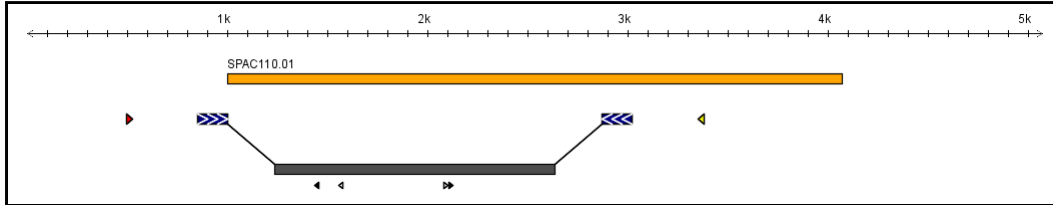

SPAC110.03

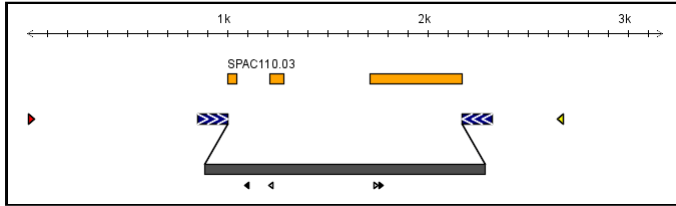

SPAC110.04c

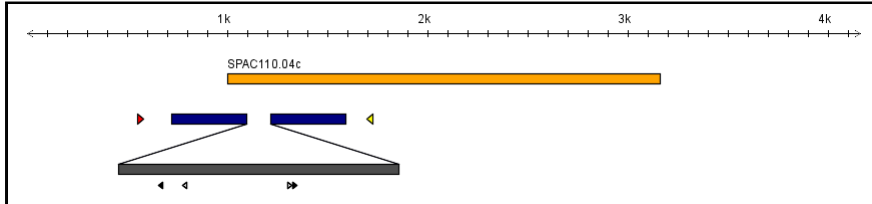

SPAC1142.01

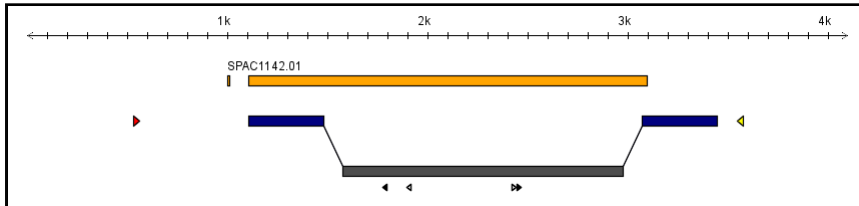

SPAC1142.02c

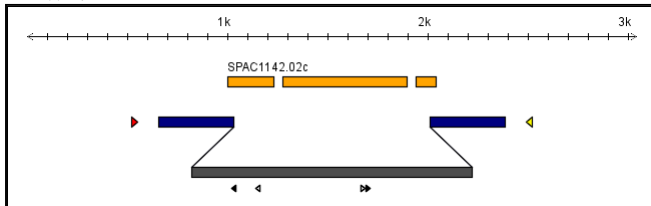

SPAC1142.04

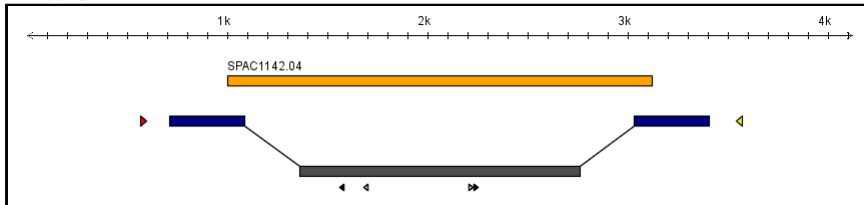

SPAC1142.05

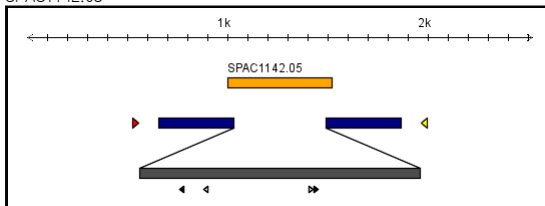

SPAC1142.06

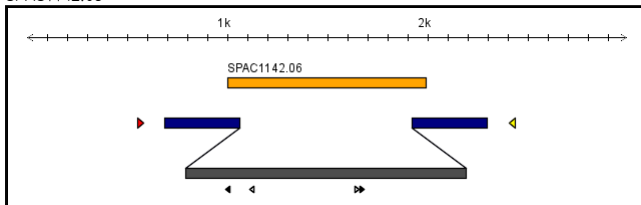

SPAC1142.07c

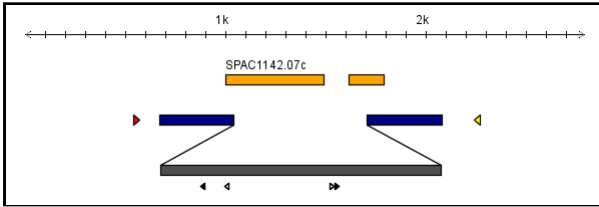

SPAC1250.02

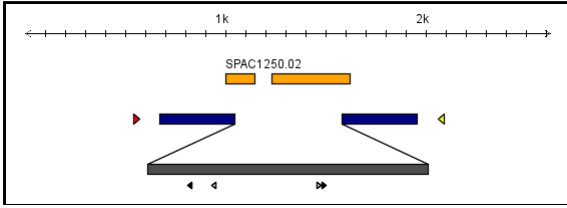

SPAC1250.03

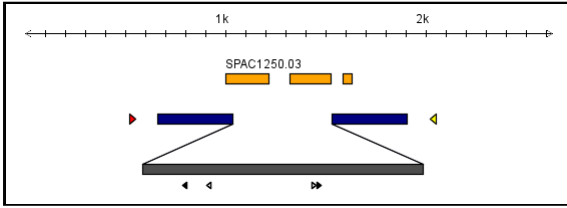

SPAC1250.04c

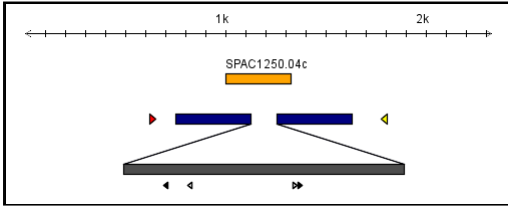

SPAC1250.05

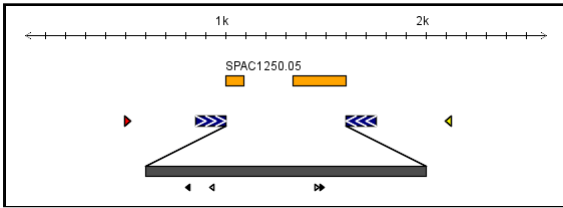

SPAC1296.01c

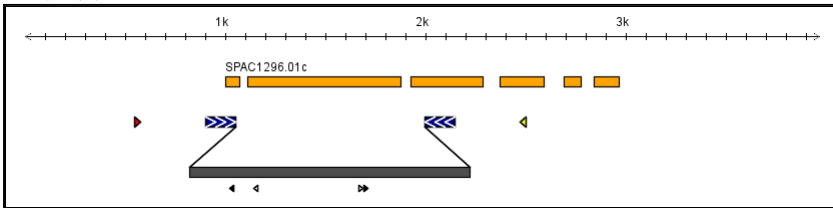

SPAC1296.02

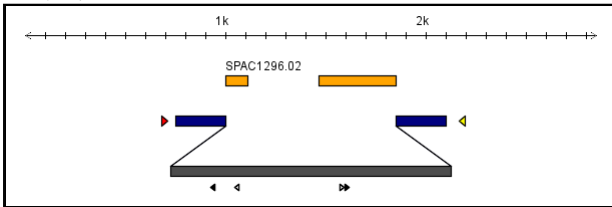

SPAC1296.03c

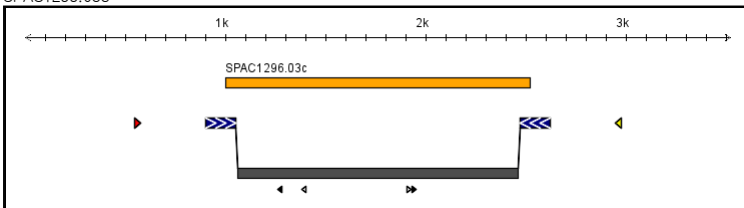

SPAC1296.04

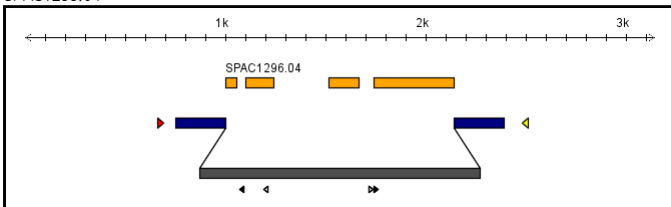

SPAC1296.05c

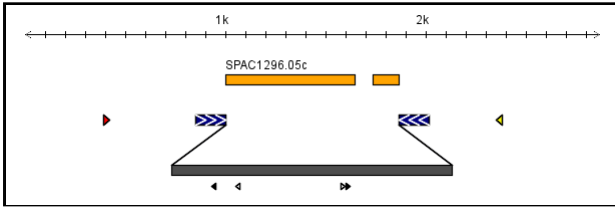

SPAC1296.06

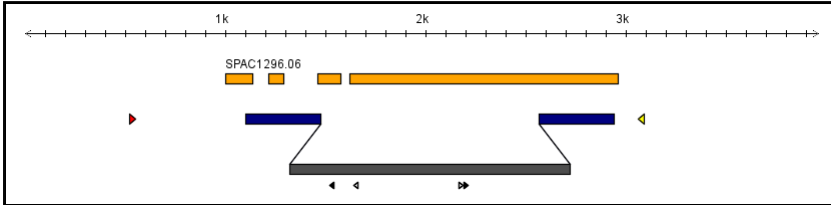

SPAC1327.01c

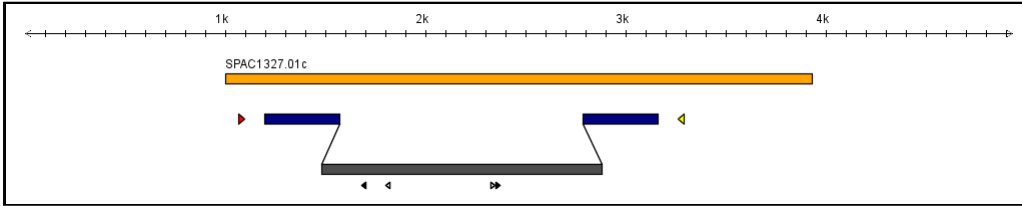

SPAC139.02c

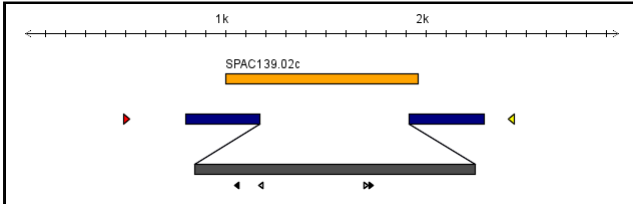

SPAC139.03

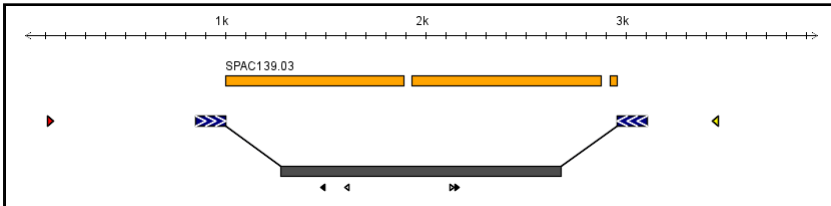

SPAC139.04c

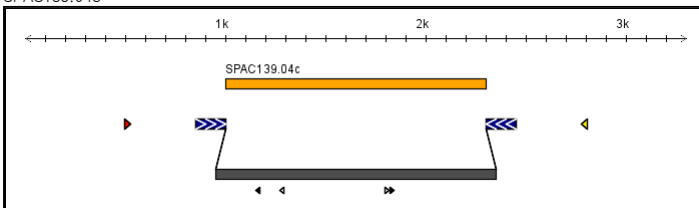

SPAC139.05

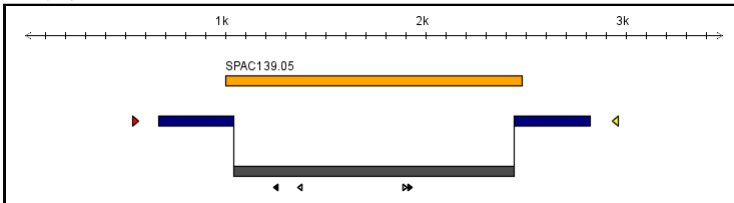

SPAC139.06

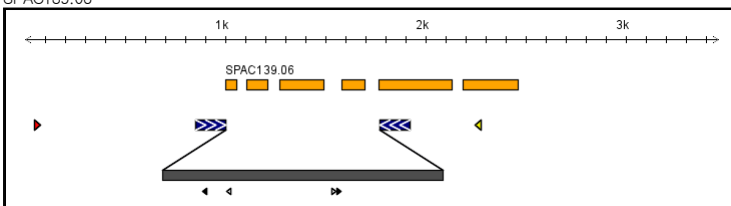

SPAC1399.01c

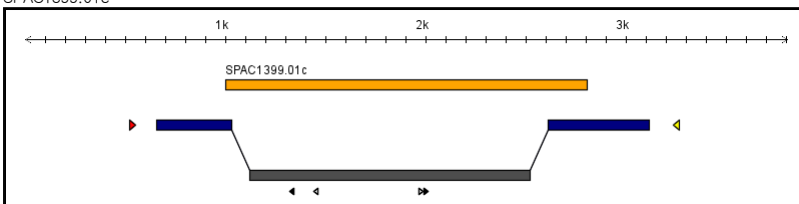

SPAC1399.02

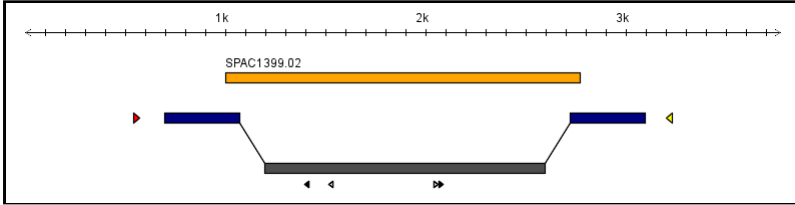

SPAC1399.03

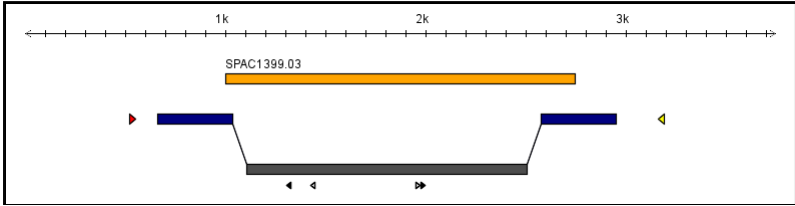

SPAC1399.04c

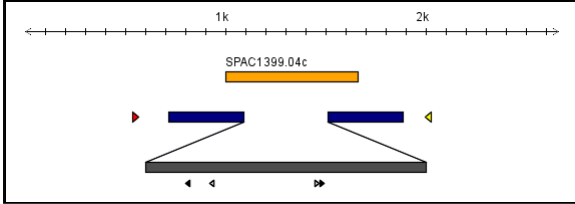

SPAC1399.05c

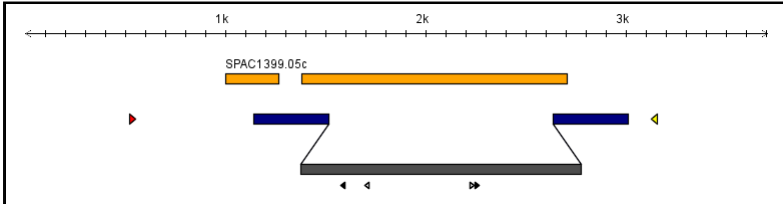

SPAC140.01

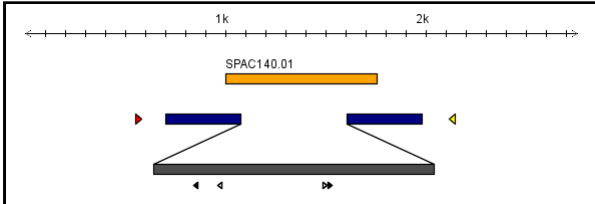

SPAC140.02

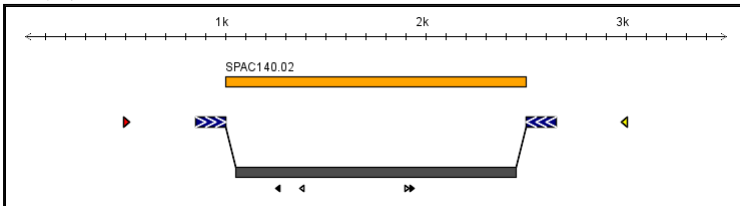

SPAC140.03

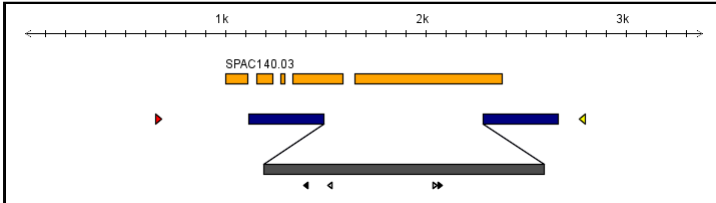

SPAC140.04

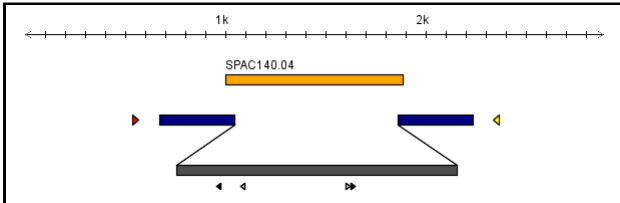

SPAC1420.01c

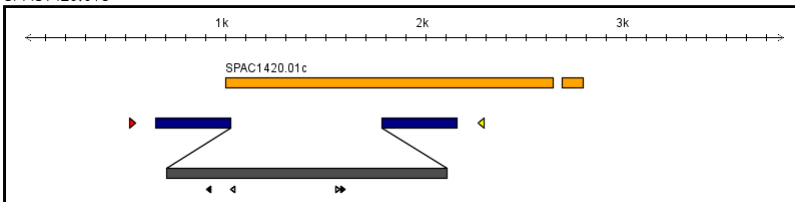

SPAC1420.02c

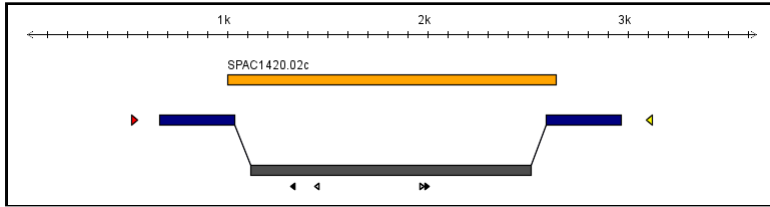

SPAC1420.03

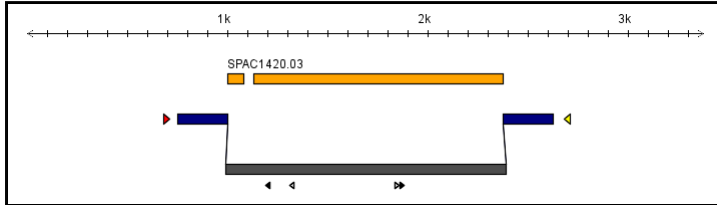

SPAC1420.04c

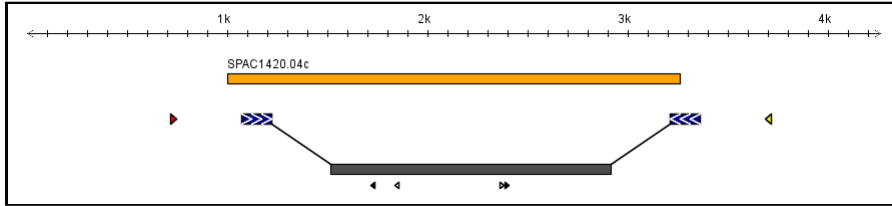

SPAC144.01

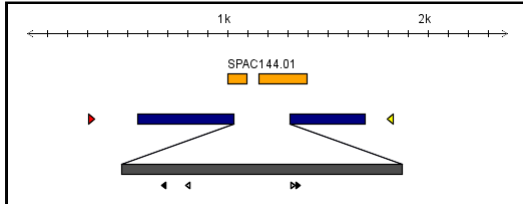

SPAC144.02

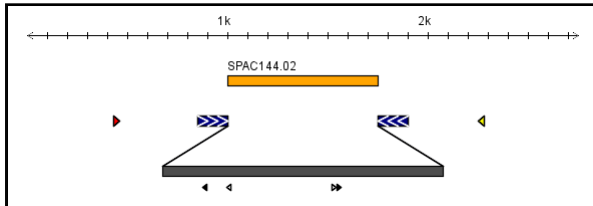

SPAC144.03

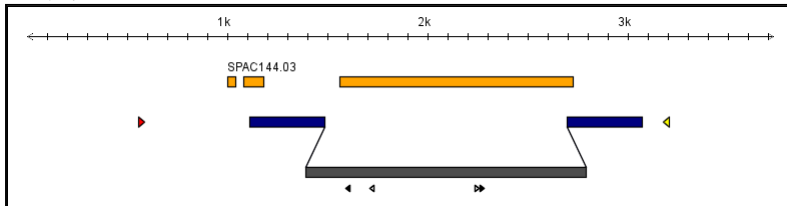

SPAC144.04c

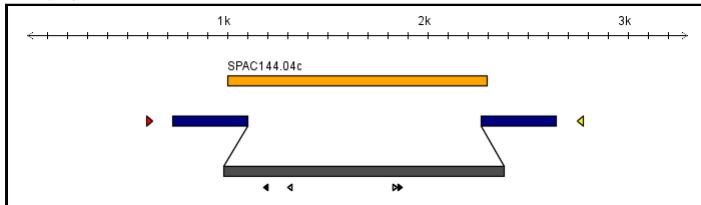

SPAC144.06

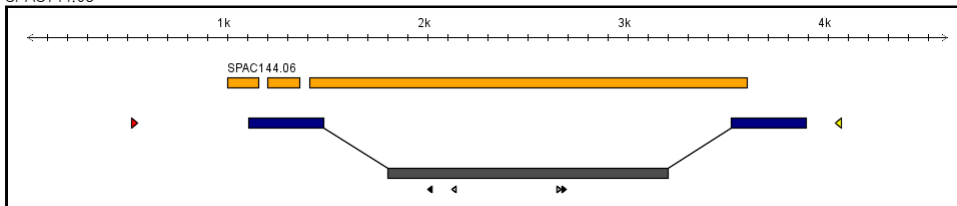

SPAC144.07c

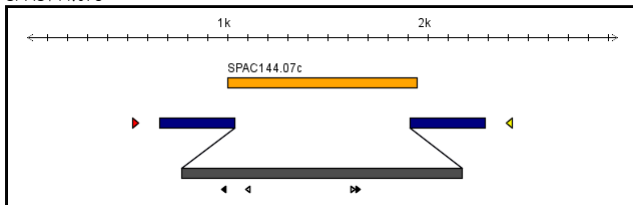

SPAC144.08

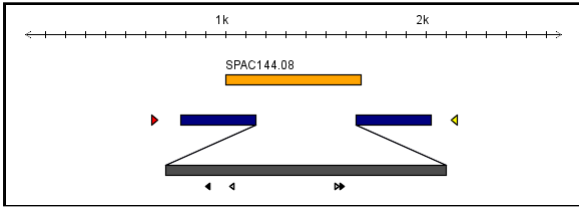

SPAC144.09c

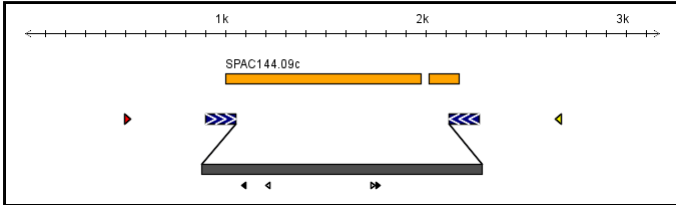

SPAC144.10c

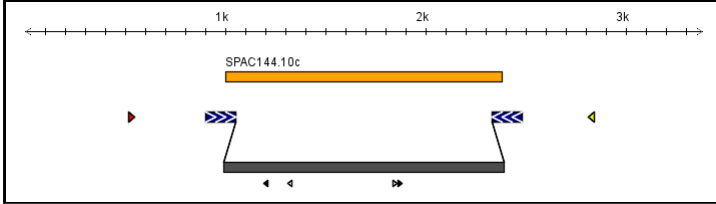

SPAC144.11

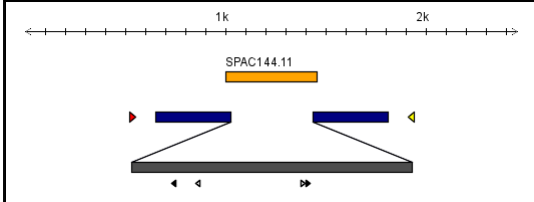

SPAC144.12

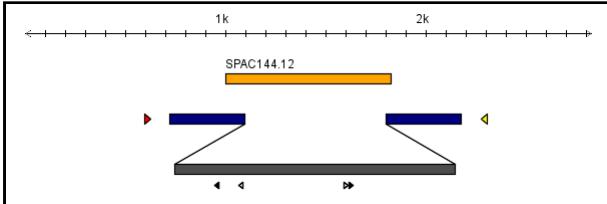

SPAC144.13c

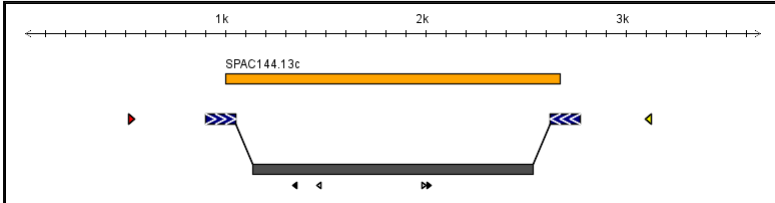

SPAC144.14

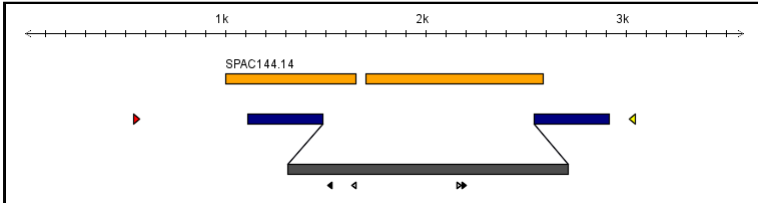

SPAC144.15c

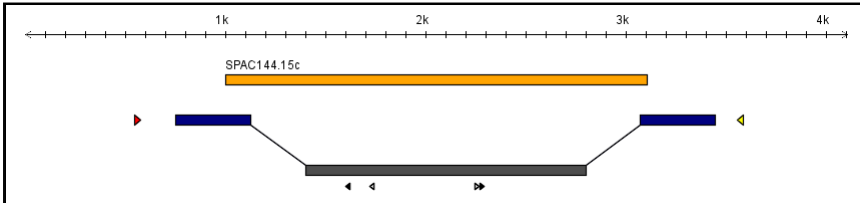

SPAC144.16

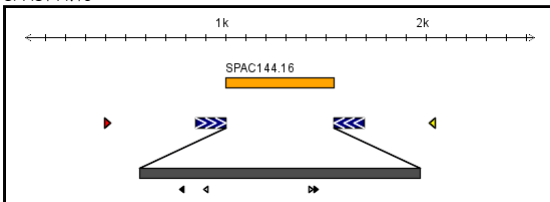

SPAC144.17c

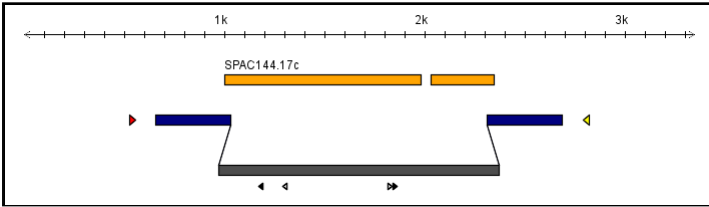

SPAC144.18

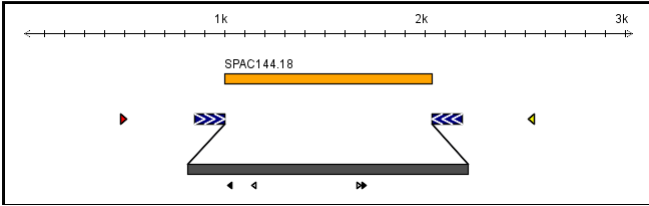

SPAC1486.01

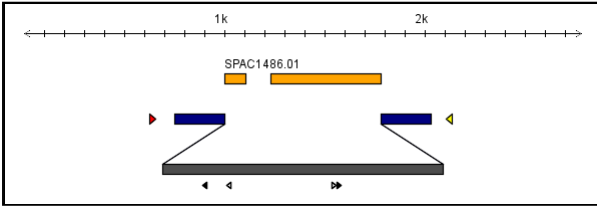

SPAC1486.02c

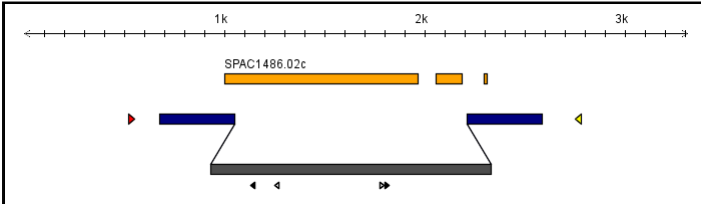

SPAC1486.06

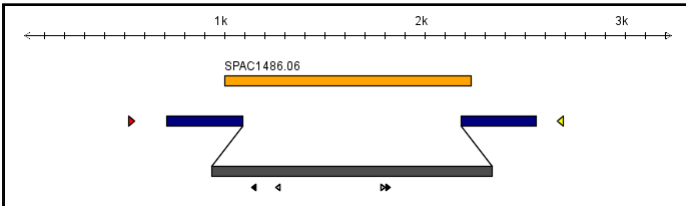

SPAC1486.07c

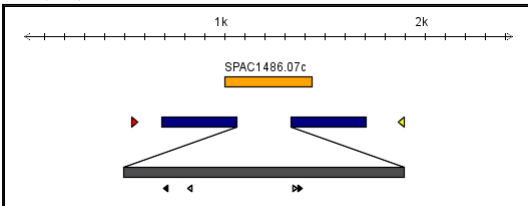

SPAC1486.08

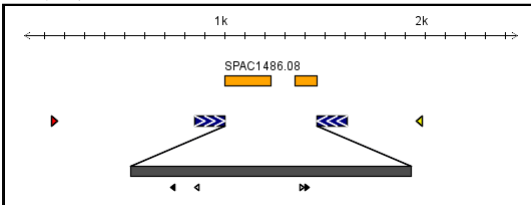

SPAC1486.09

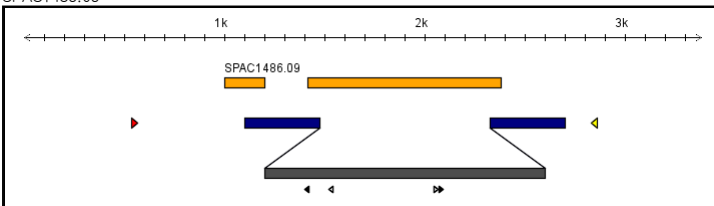

SPAC1486.10

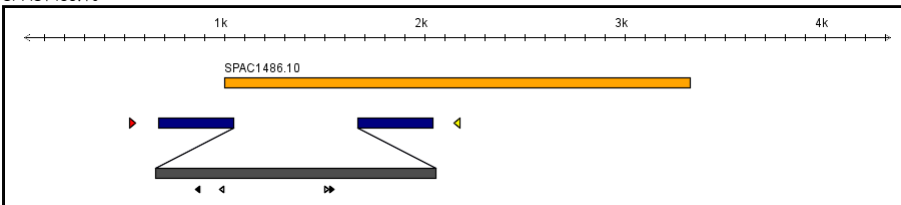



SPAC1527.02

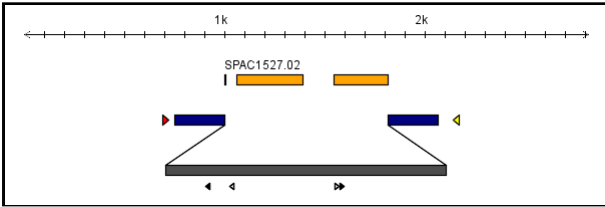

SPAC1527.03

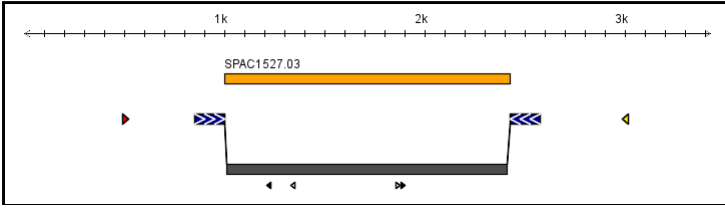

SPAC1556.01c

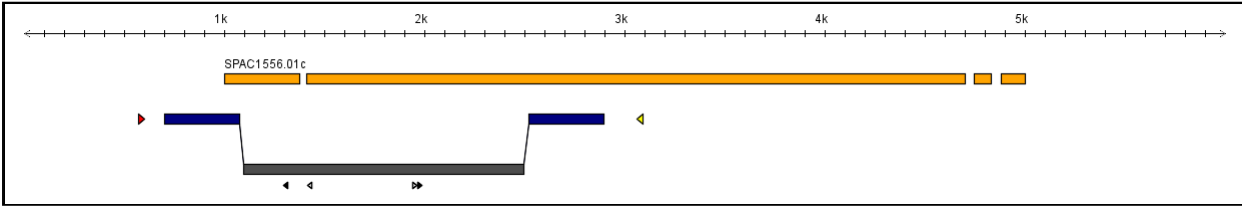

SPAC1556.02c

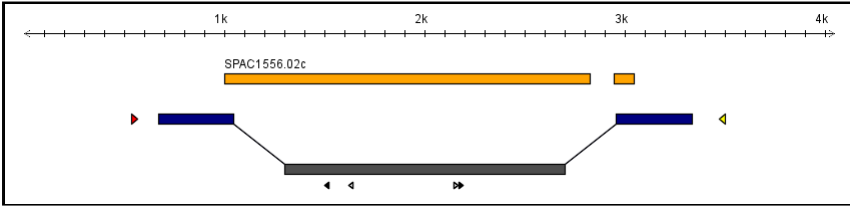

SPAC1556.03

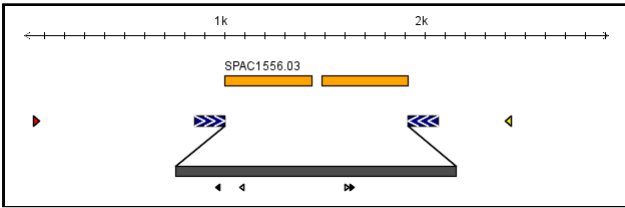

SPAC1556.04c

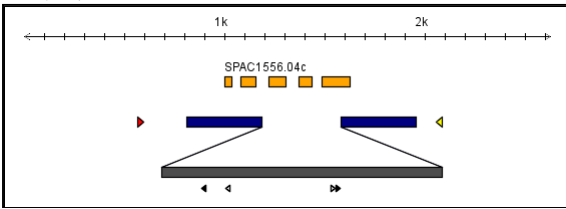

SPAC1556.05c

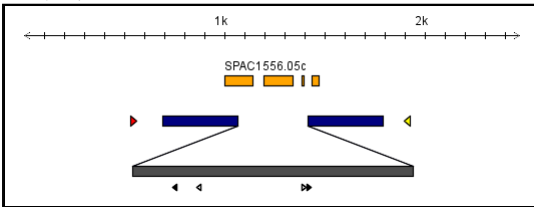

SPAC1556.06

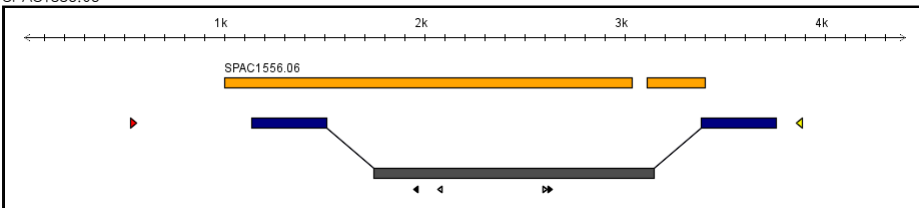

SPAC1556.07

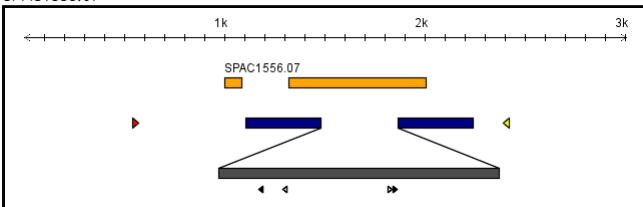

SPAC1556.08c

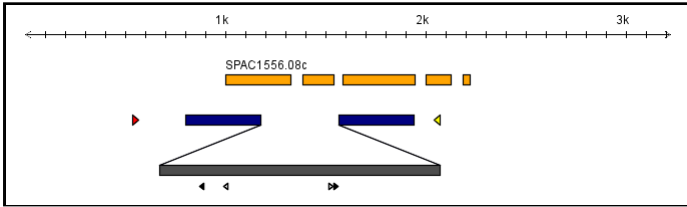

SPAC1565.01

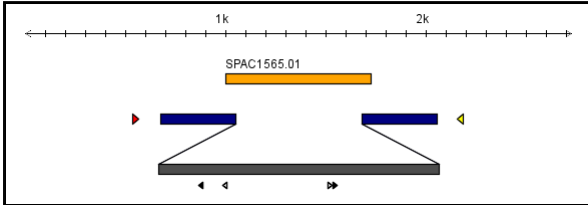

SPAC1565.02c

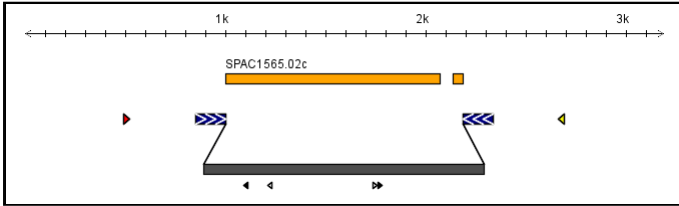

SPAC1565.03

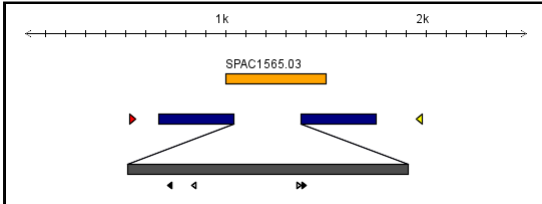

SPAC1565.04c

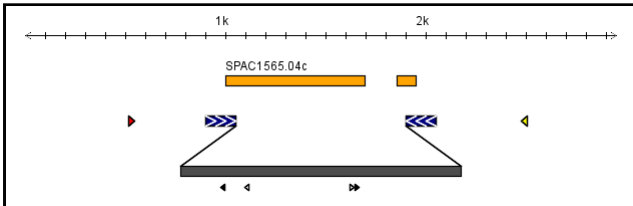

SPAC1565.05

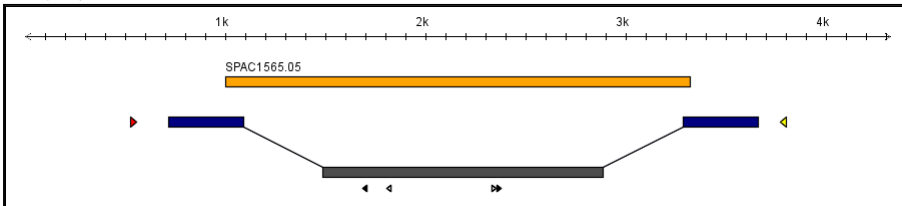

SPAC1565.06c

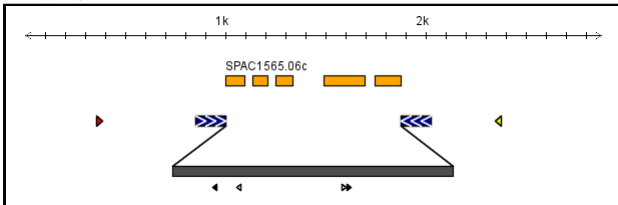

SPAC1565.08

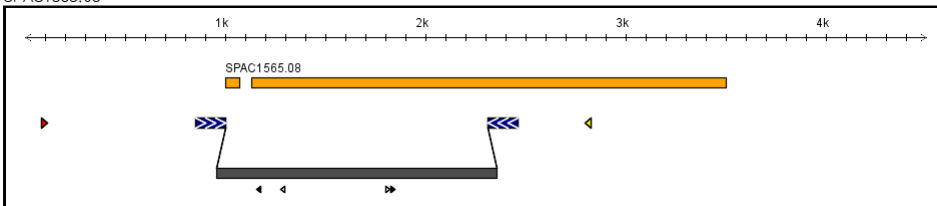

SPAC1610.01

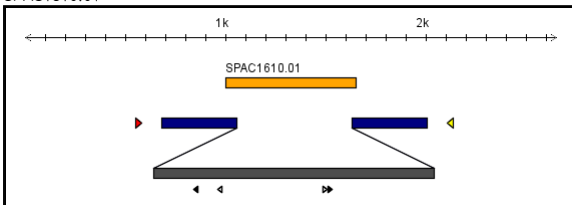

SPAC1610.02c

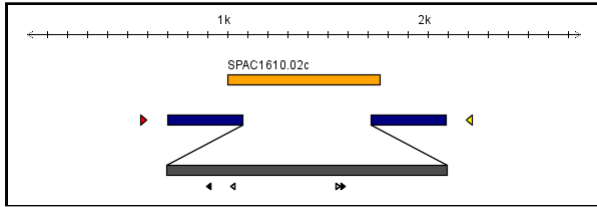

SPAC1610.04

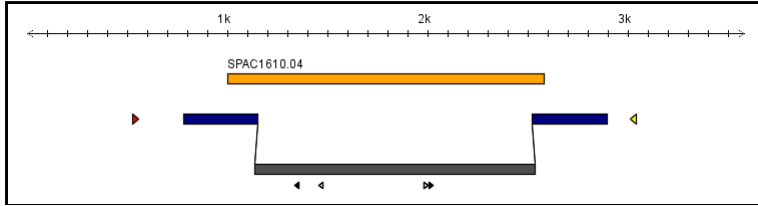

SPAC1635.01

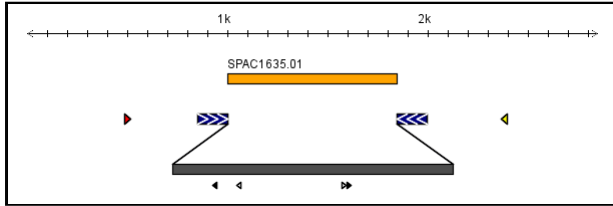

SPAC1639.01c

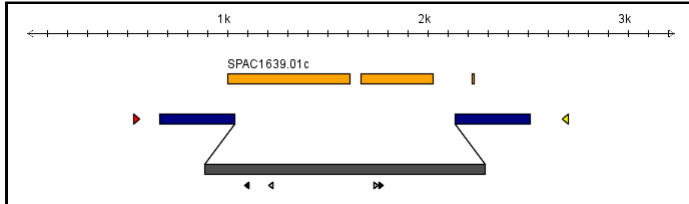

SPAC167.02

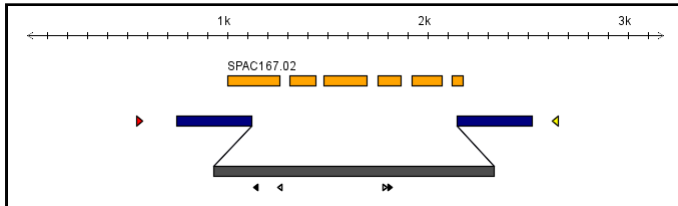

SPAC167.03c

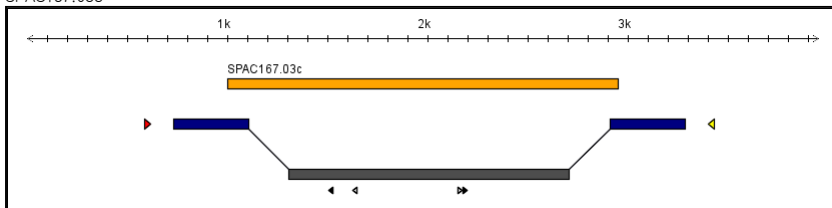

SPAC167.04

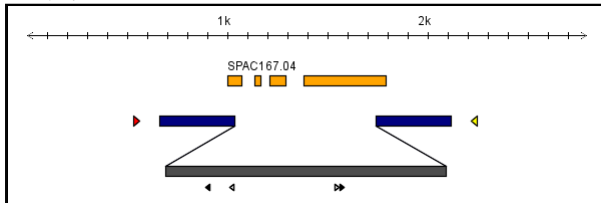

SPAC167.05

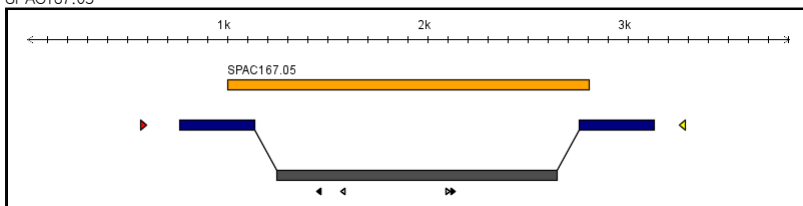

SPAC167.06c

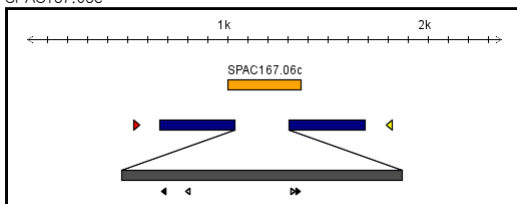

SPAC1687.01

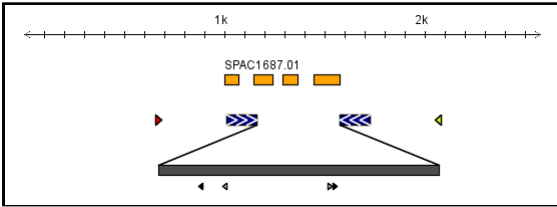

SPAC1687.02

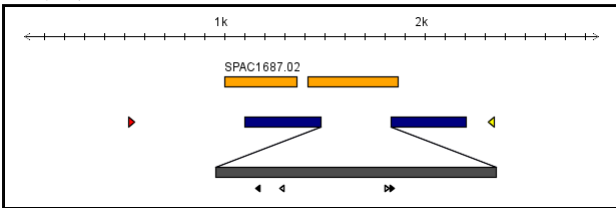

SPAC1687.03c

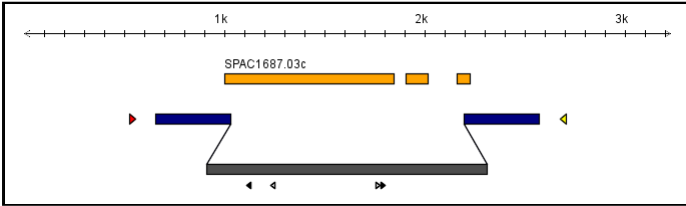

SPAC1687.04

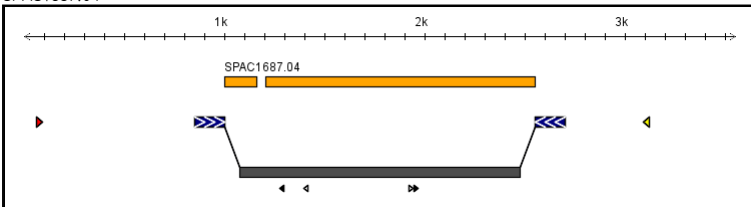

SPAC1687.06c

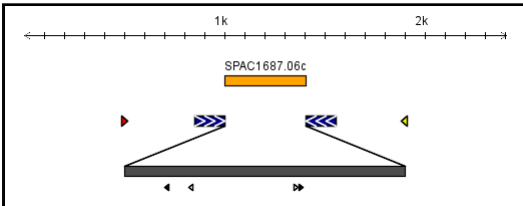

SPAC1687.07

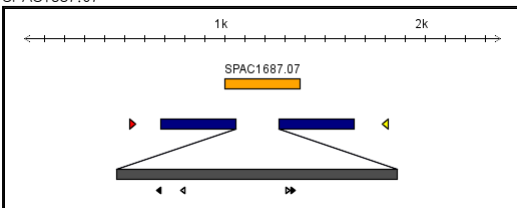

SPAC1687.08

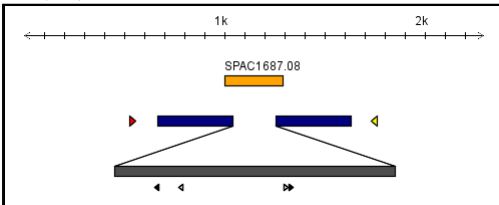

SPAC1687.10

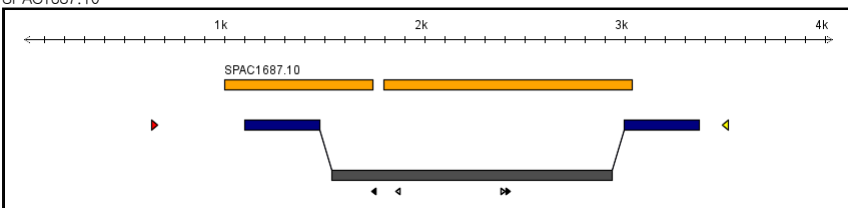

SPAC1687.11

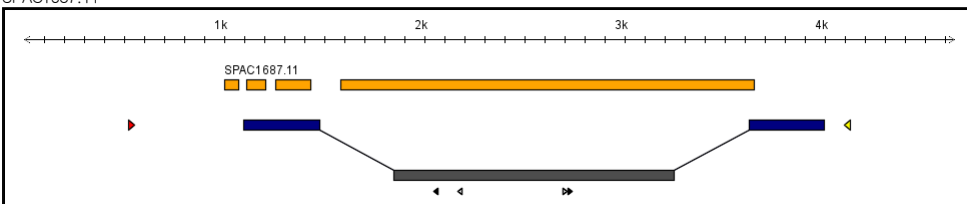

SPAC1687.12c

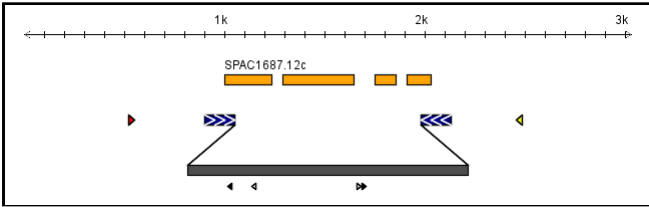

SPAC1687.13c

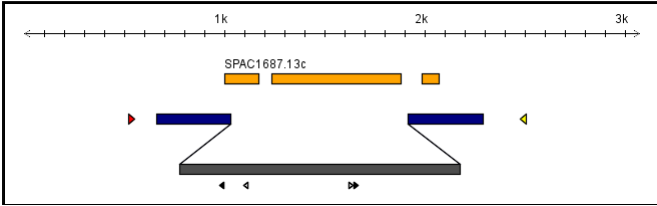

SPAC1687.14c

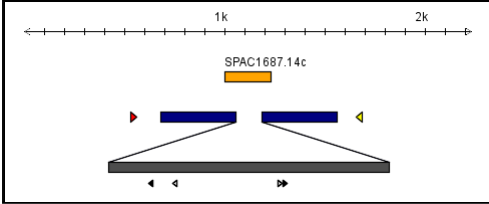

SPAC1687.15

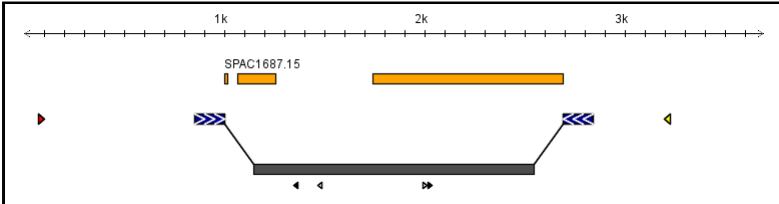

SPAC1687.16c

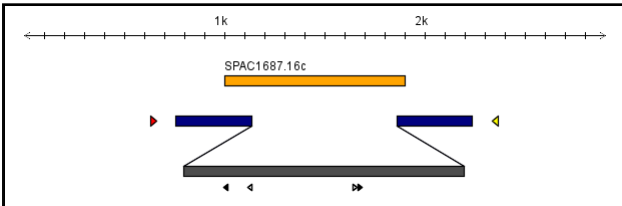

SPAC1687.17c

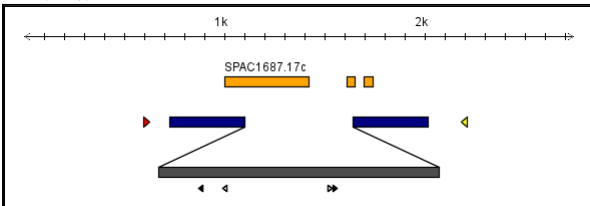

SPAC1687.18c

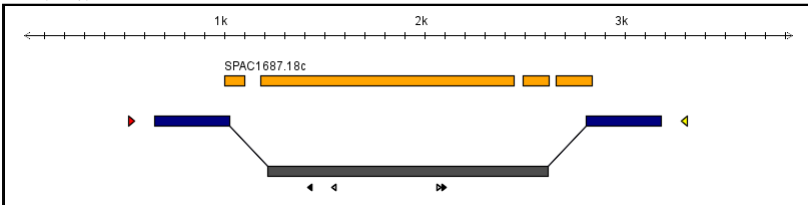

SPAC1687.19c

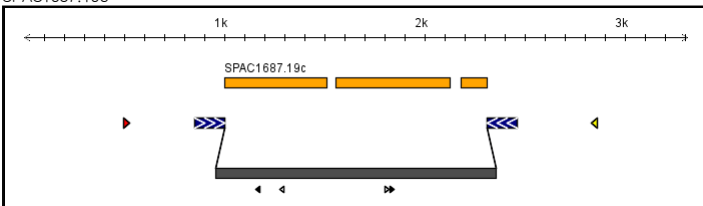

SPAC1687.20c

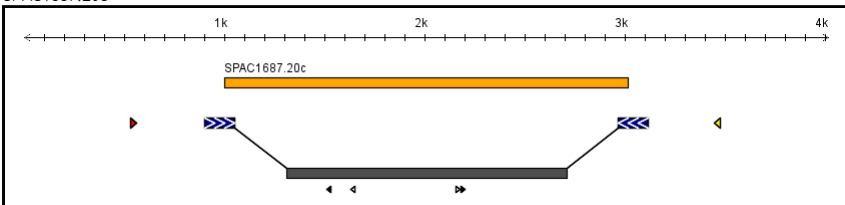

SPAC1687.21

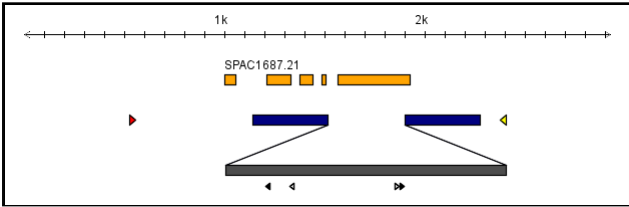

SPAC1687.22c

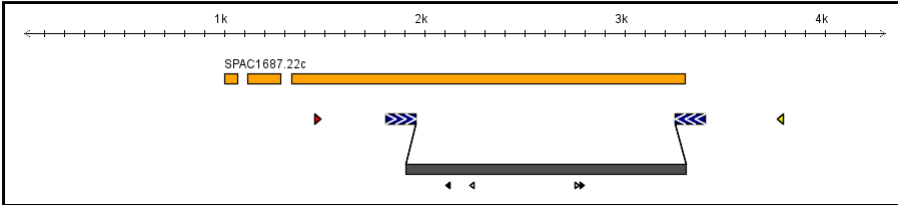

SPAC1687.23c

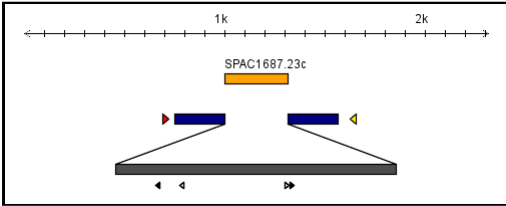

SPAC1705.02

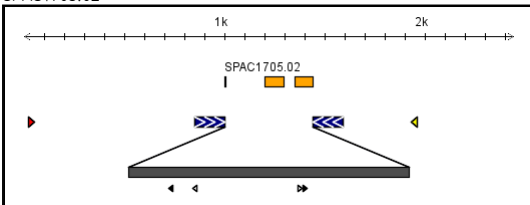

SPAC1705.03c

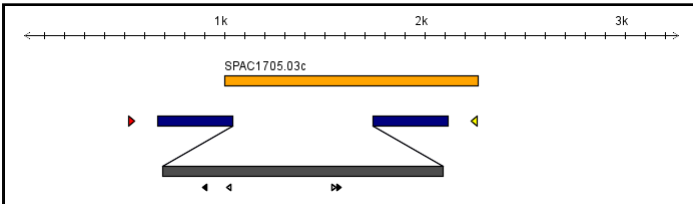

SPAC1751.01c

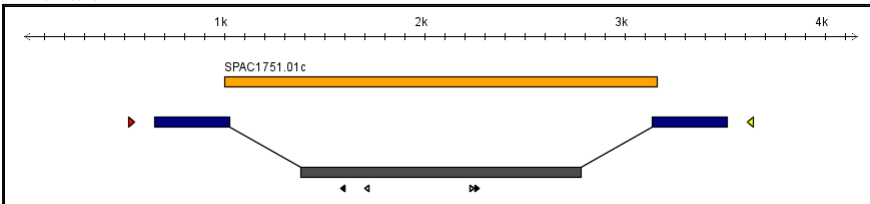

SPAC1751.02c

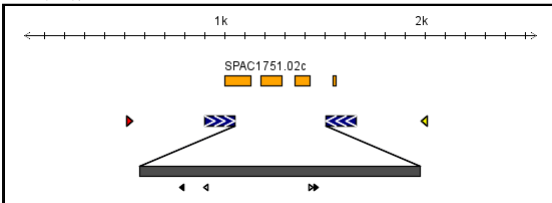

SPAC1751.03

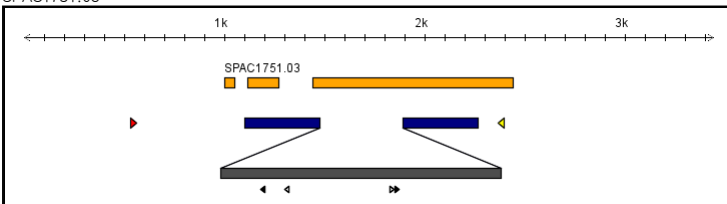

SPAC1751.04

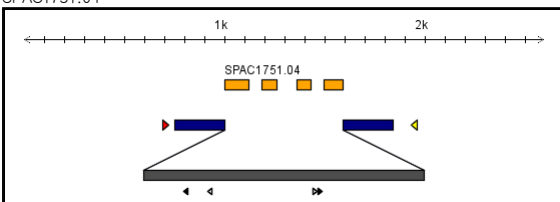

SPAC1782.02c

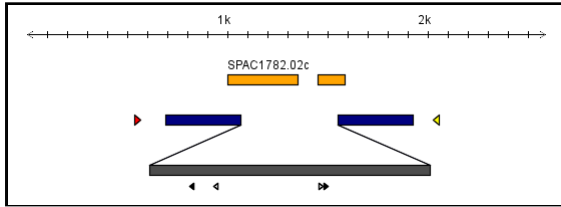

SPAC1782.03

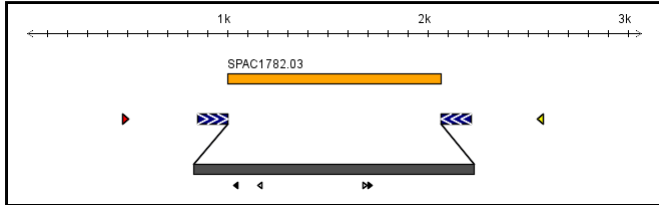

SPAC1782.04

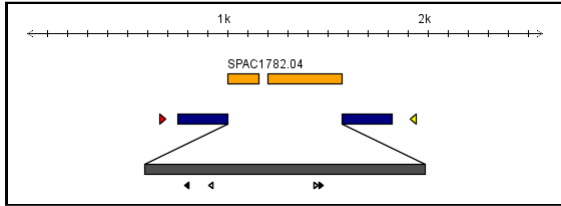

SPAC1782.05

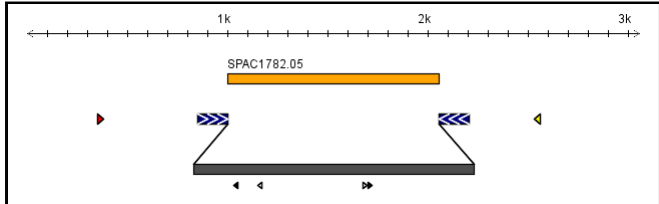

SPAC186.01

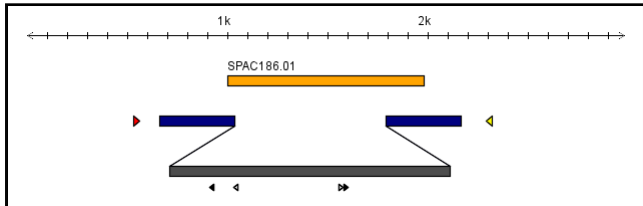

SPAC186.02c

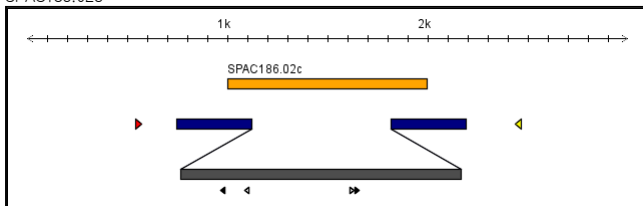

SPAC186.03

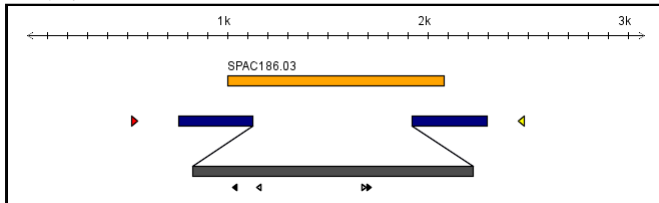

SPAC186.05c

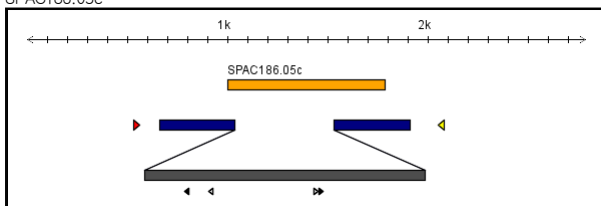

SPAC186.06

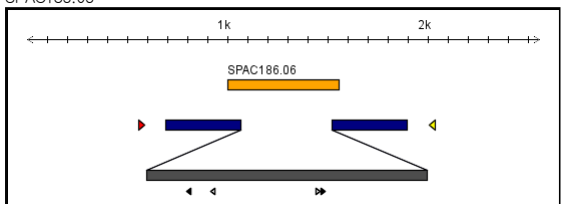

SPAC186.07c

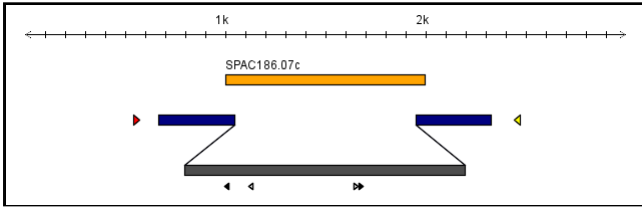

SPAC186.08c

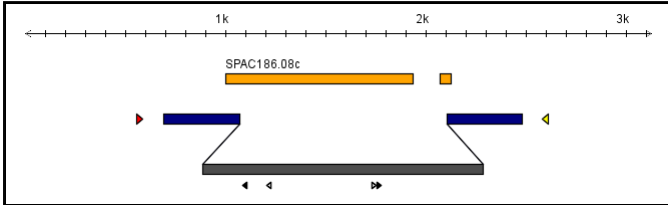

SPAC186.09

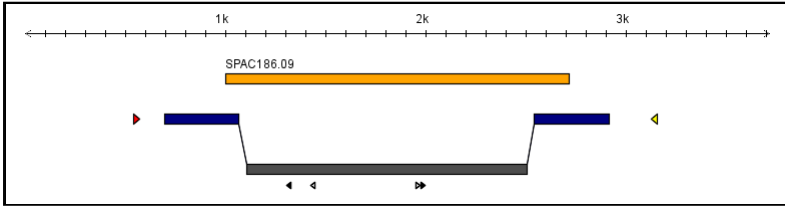

SPAC20H4.01

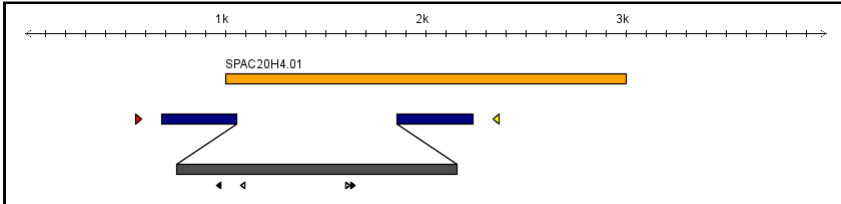

SPAC20H4.02

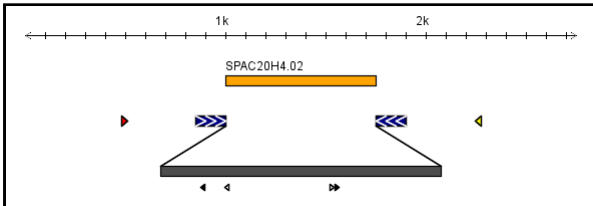

SPAC20H4.03c

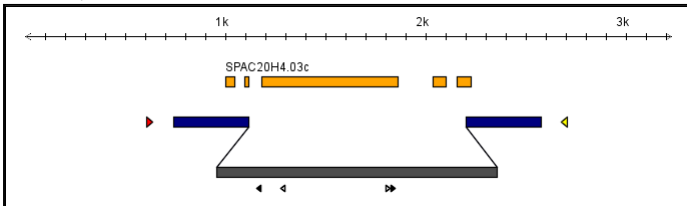

SPAC20H4.04

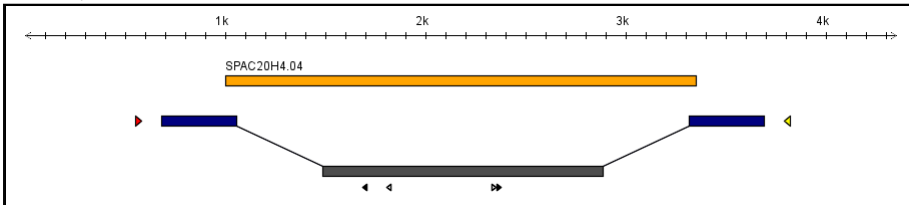

SPAC20H4.05c

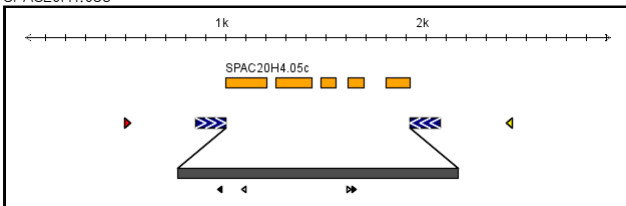

SPAC20H4.06c

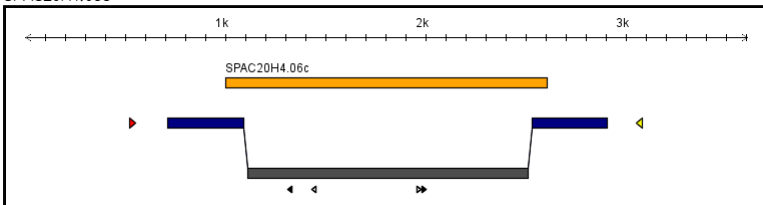



SPAC20H4.07

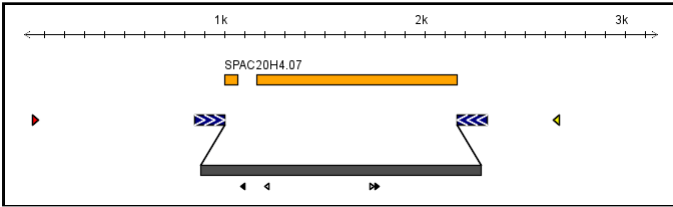

SPAC20H4.08

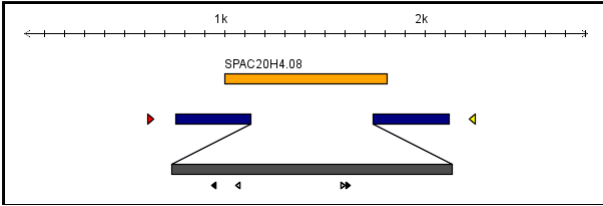

SPAC20H4.10

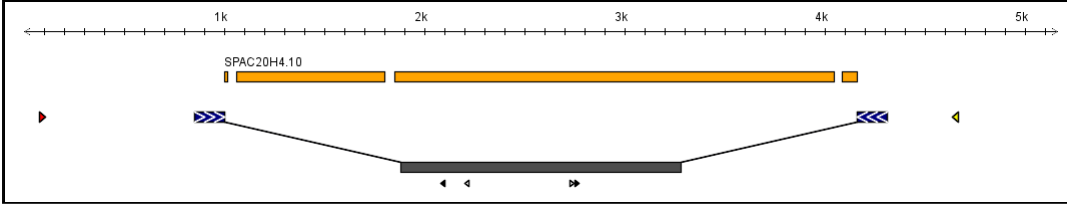

SPAC20H4.11c

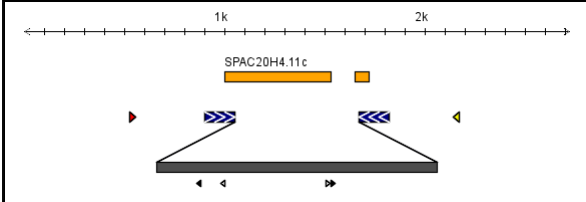

SPAC212.01c

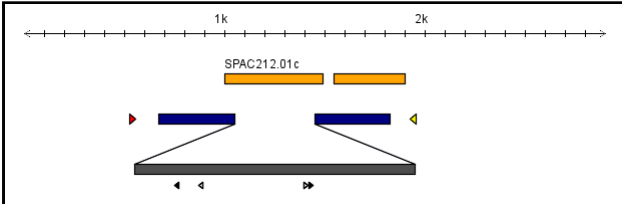

SPAC212.02

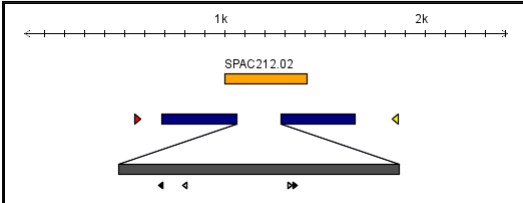

SPAC212.03

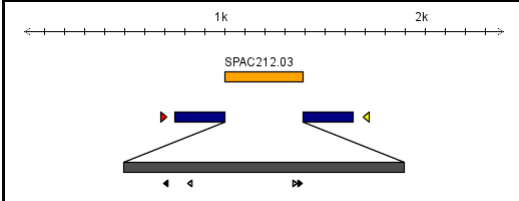

SPAC212.04c

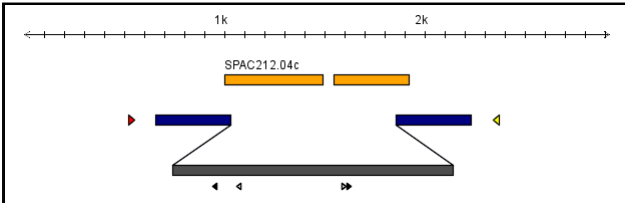

SPAC212.08c

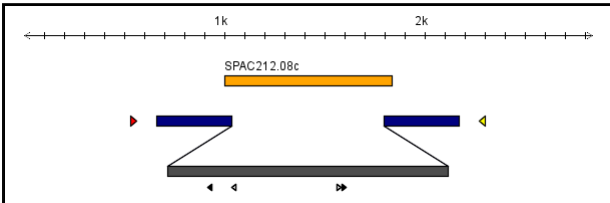

SPAC21E11.03c

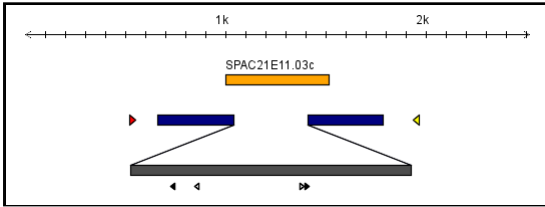

SPAC21E11.04

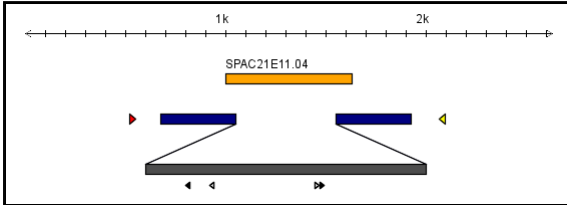

SPAC21E11.05c

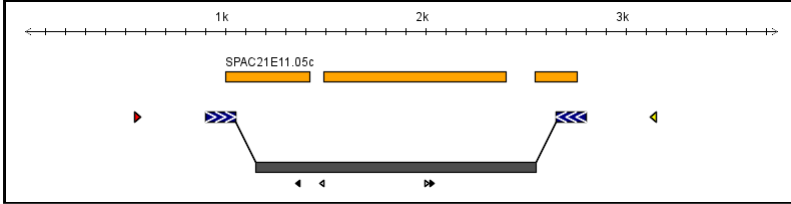

SPAC21E11.06

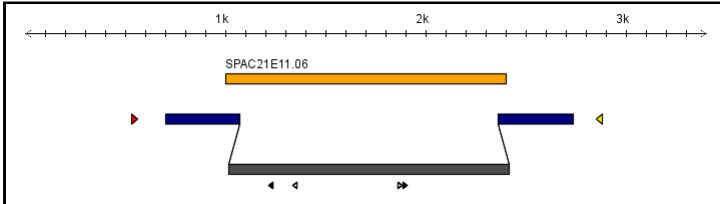

SPAC21E11.07

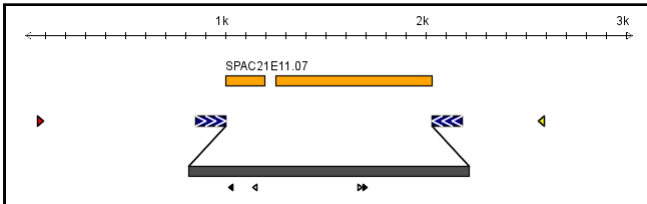

SPAC21E11.08

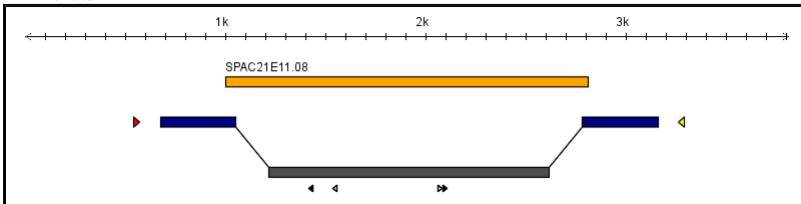

SPAC222.03c

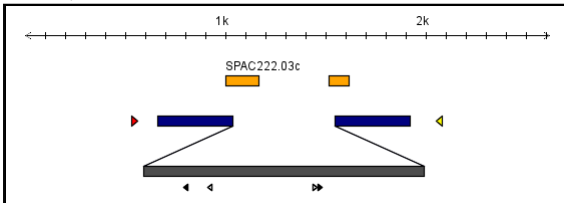

SPAC222.04c

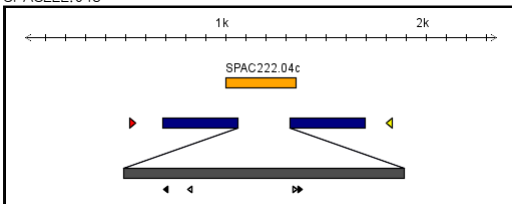

SPAC222.05c

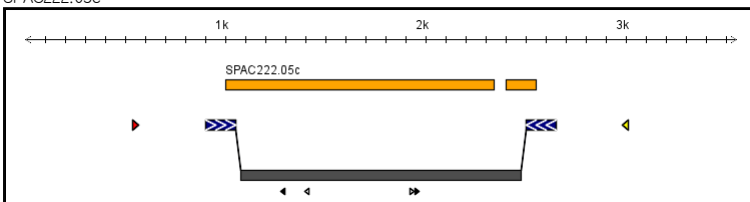

SPAC222.06

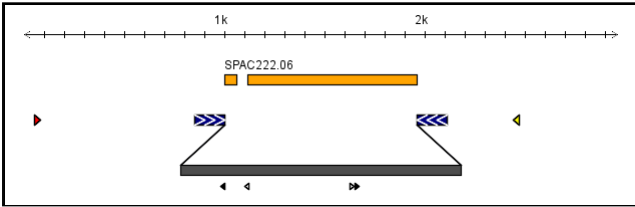

SPAC222.07c

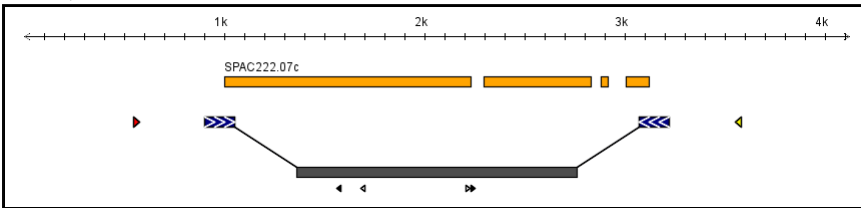

SPAC222.08c

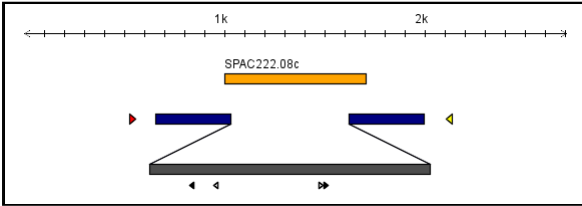

SPAC222.09

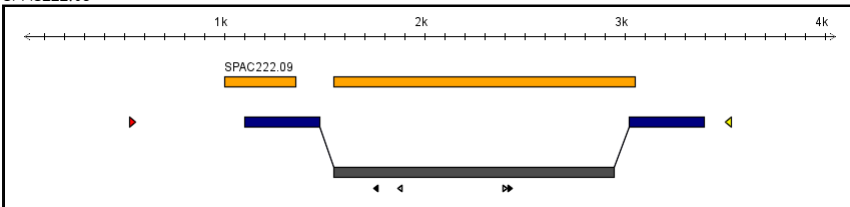

SPAC222.10c

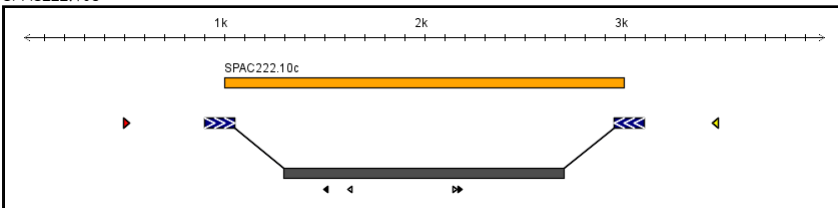

SPAC222.11

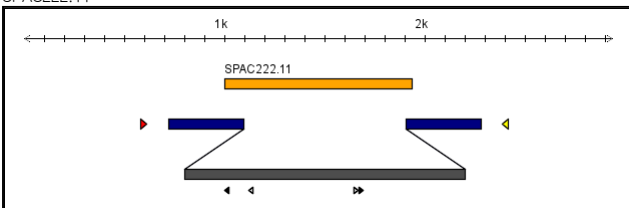

SPAC222.12c

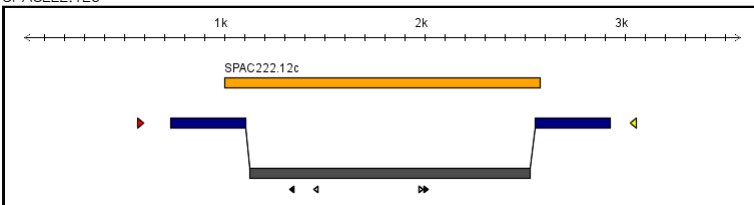

SPAC222.13c

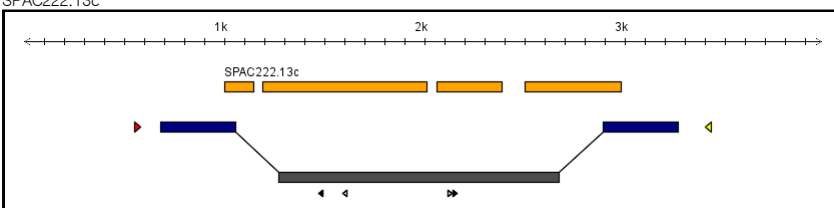

SPAC222.15

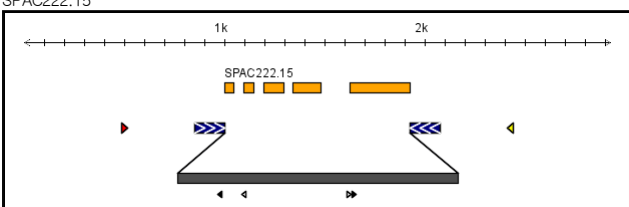

SPAC227.01c

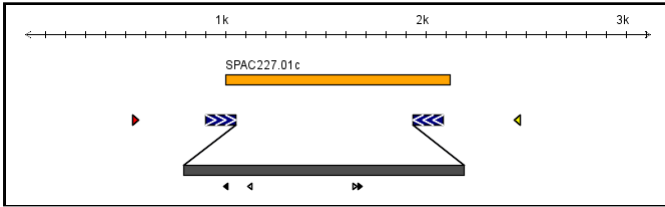

SPAC227.02c

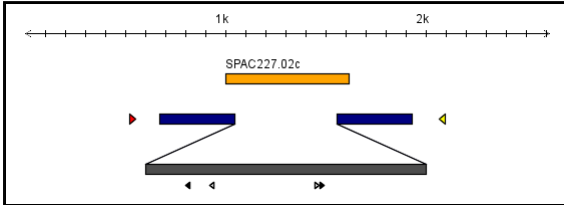

SPAC227.03c

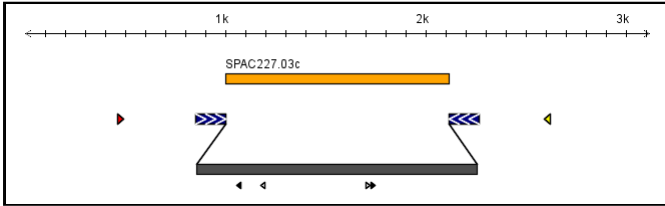

SPAC227.04

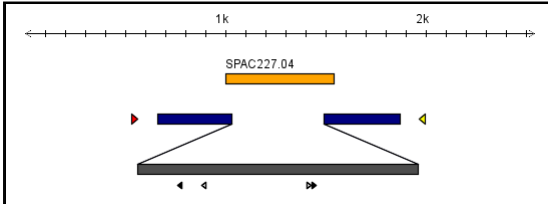

SPAC227.05

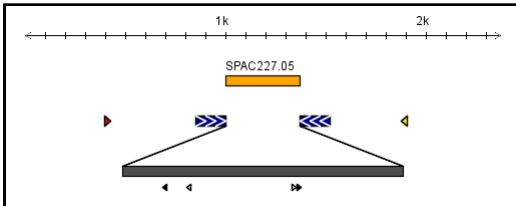

SPAC227.06

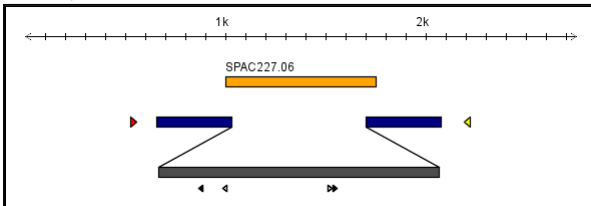

SPAC227.07c

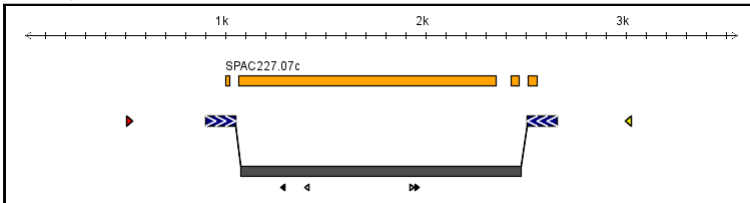

SPAC227.08c

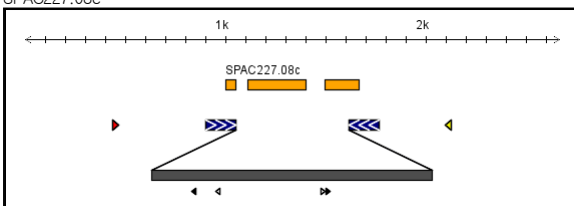

SPAC227.09

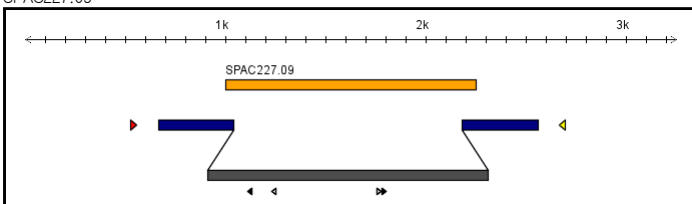

SPAC227.10

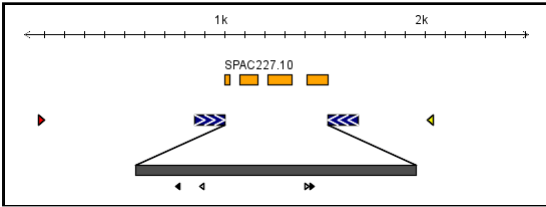

SPAC227.11c

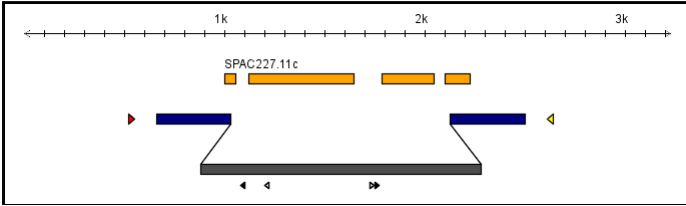

SPAC227.12

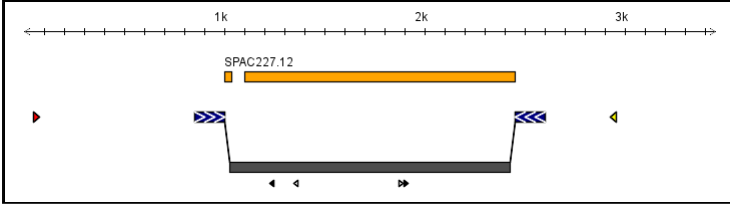

SPAC227.13c

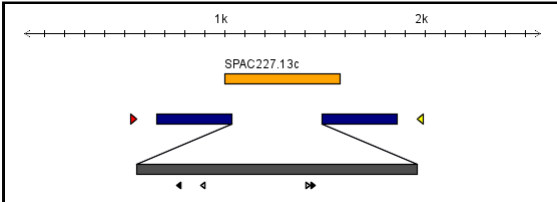

SPAC227.14

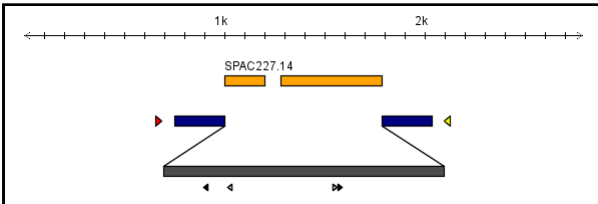

SPAC227.15

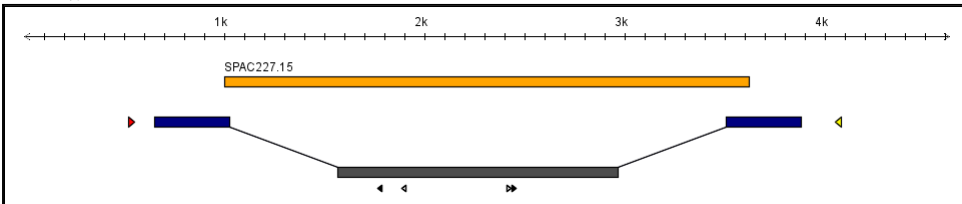

SPAC227.16c

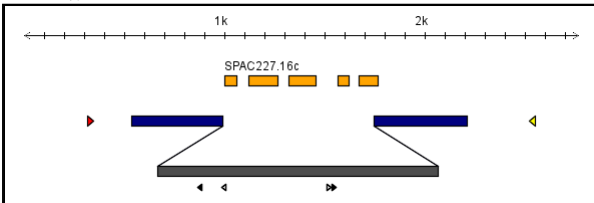

SPAC227.17c

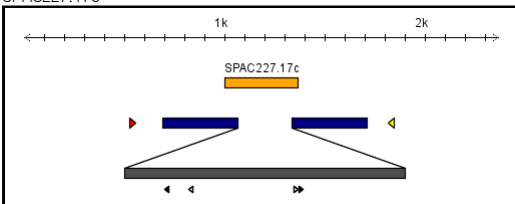

SPAC227.18

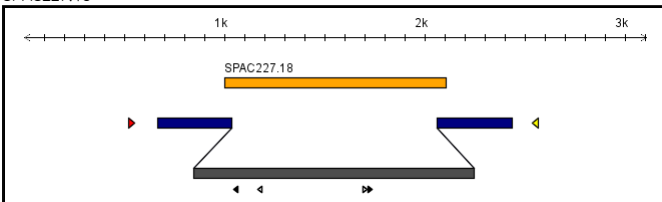

SPAC22A12.02c

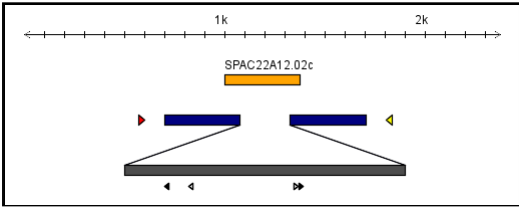

SPAC22A12.03c

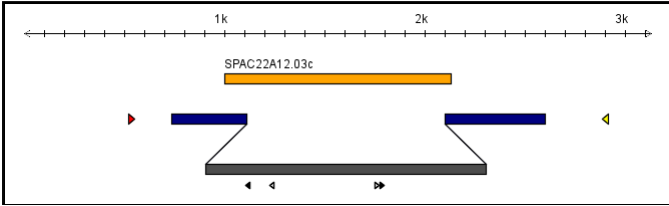

SPAC22A12.04c

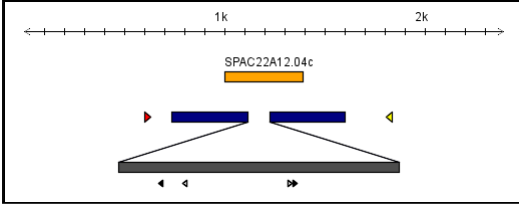

SPAC22A12.05

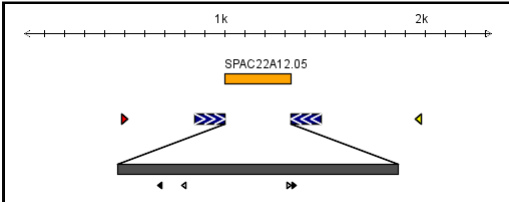

SPAC22A12.06c

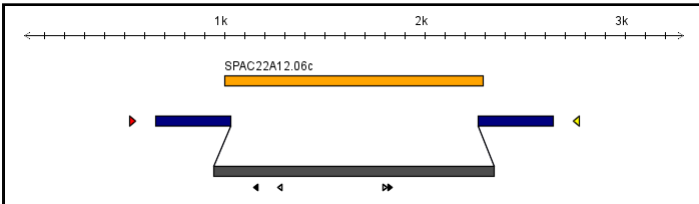

SPAC22A12.07c

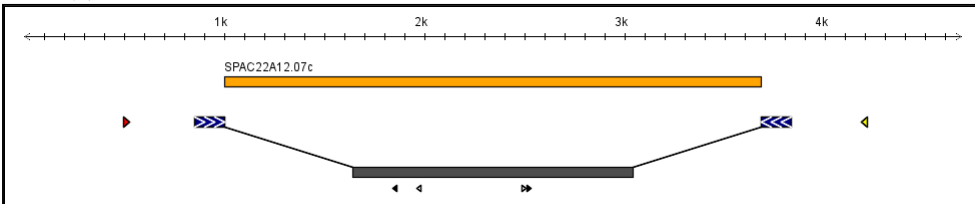

SPAC22A12.08c

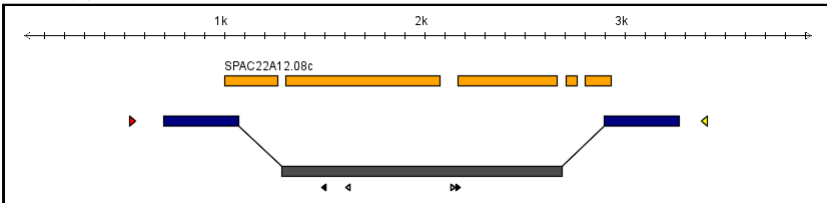

SPAC22A12.09c

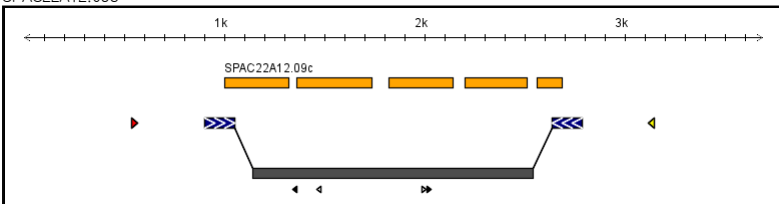

SPAC22A12.10

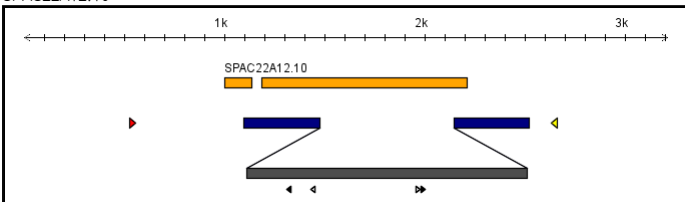

SPAC22A12.11

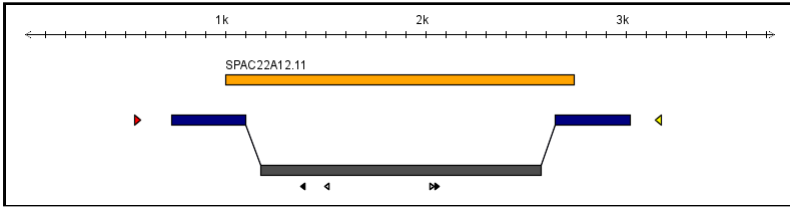

SPAC22A12.12c

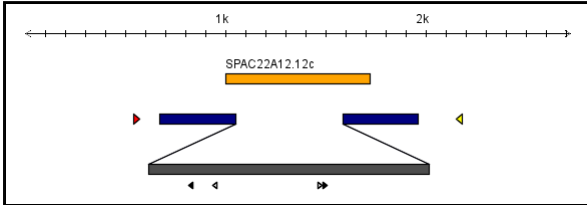

SPAC22A12.13

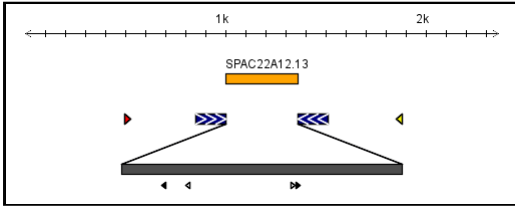

SPAC22A12.14c

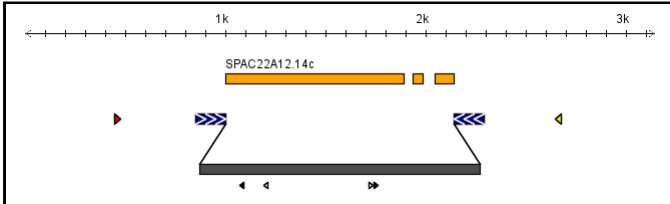

SPAC22A12.15c

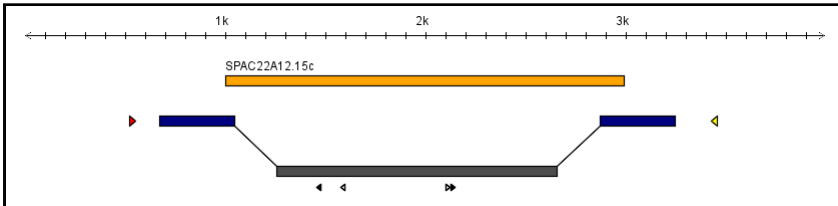

SPAC22A12.16

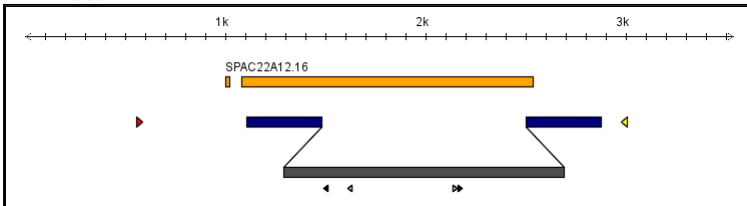

SPAC22A12.17c

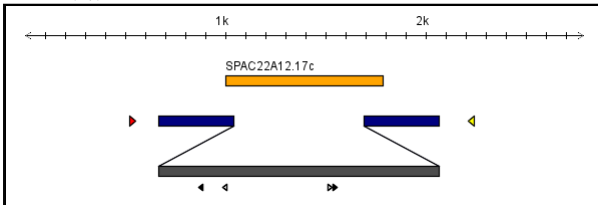

SPAC22E12.01

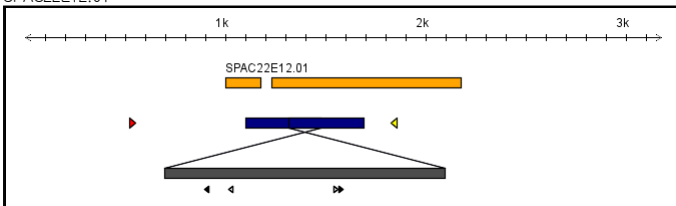

SPAC22E12.02

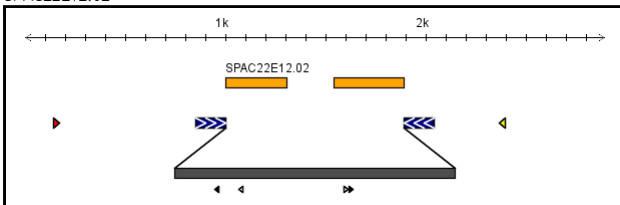

SPAC22E12.03c

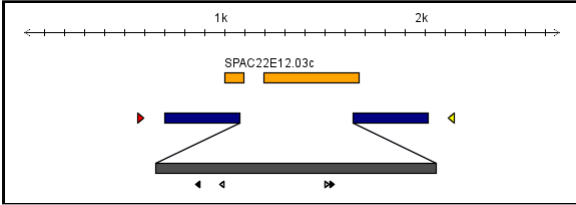

SPAC22E12.04

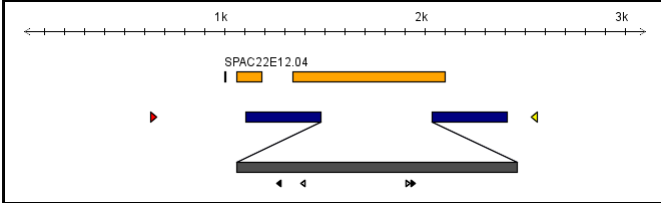

SPAC22E12.05c

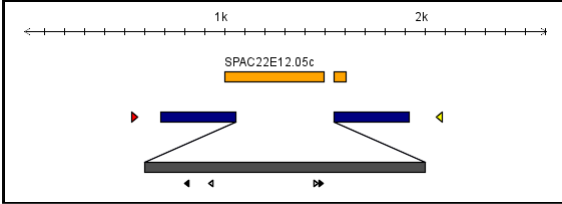

SPAC22E12.06c

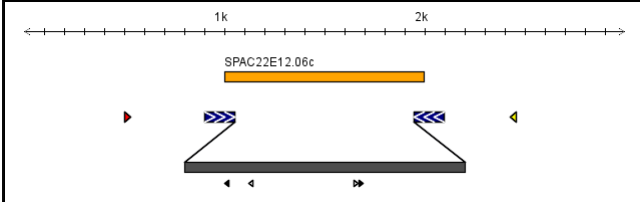

SPAC22E12.07

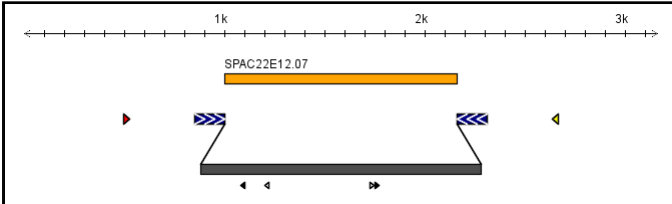

SPAC22E12.08

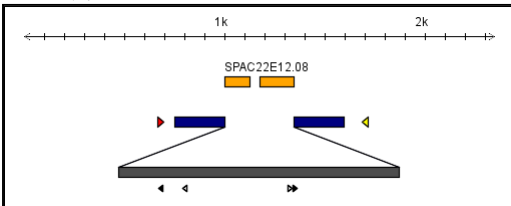

SPAC22E12.09c

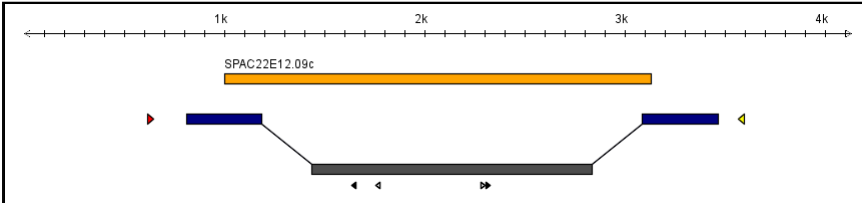

SPAC22E12.10c

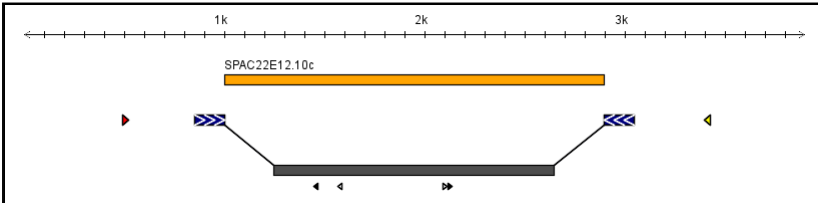

SPAC22E12.11c

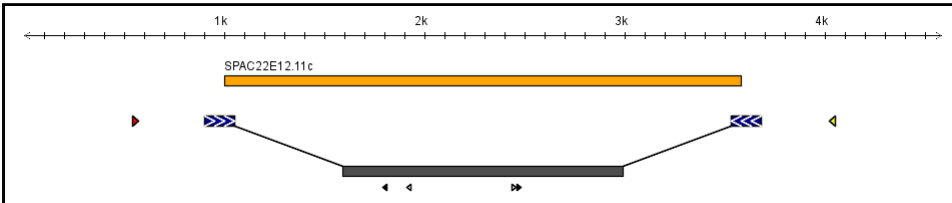



SPAC22E12.13c

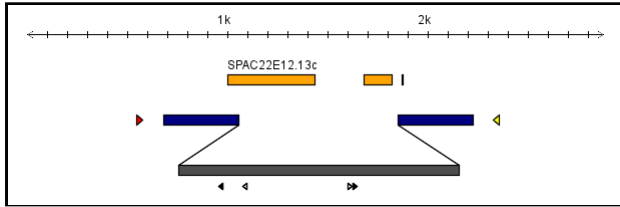

SPAC22E12.14c

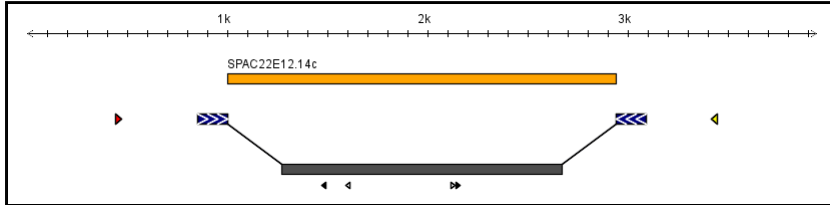

SPAC22E12.17c

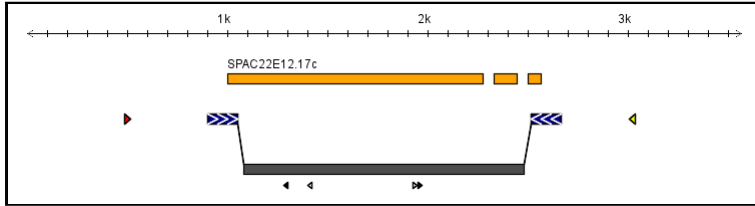

SPAC22E12.18

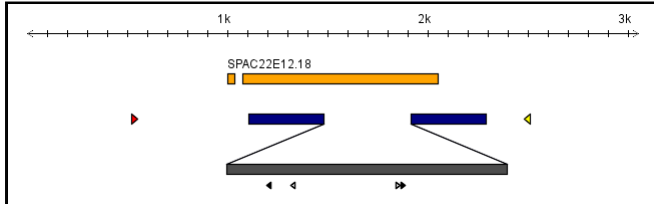

SPAC22F3.02

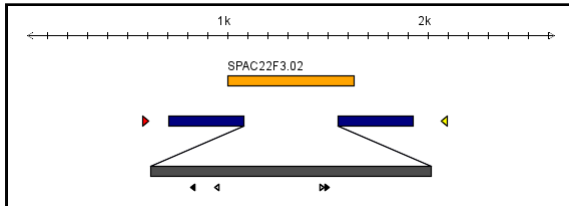

SPAC22F3.05c

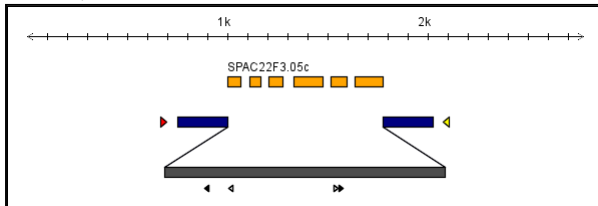

SPAC22F3.06c

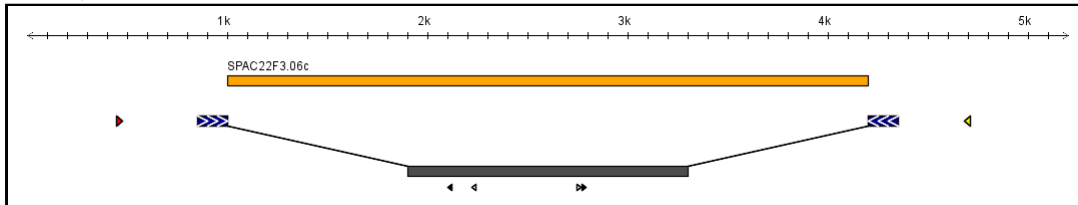

SPAC22F3.07c

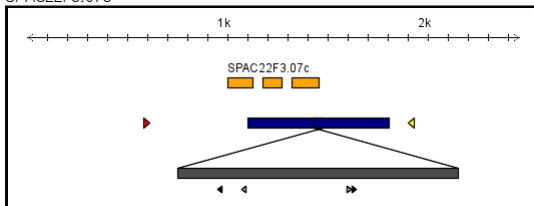

SPAC22F3.08c

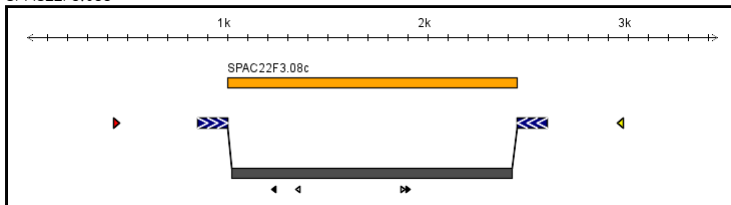

SPAC22F3.09c

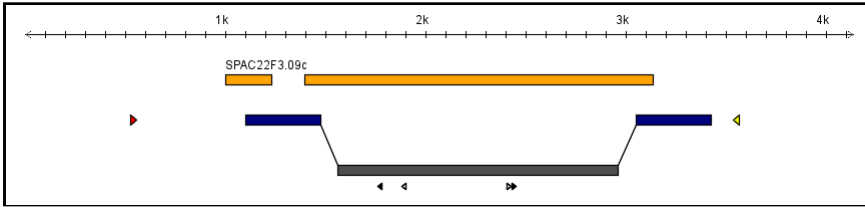

SPAC22F3.10c

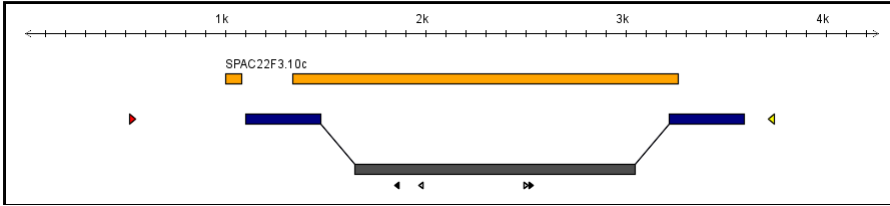

SPAC22F3.11c

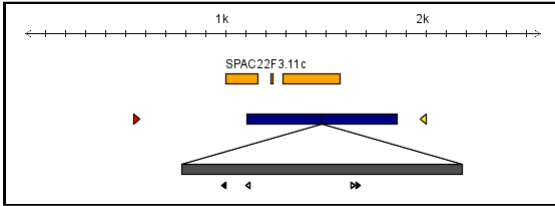

SPAC22F3.12c

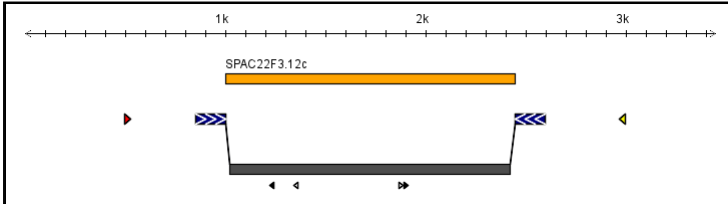

SPAC22F3.13

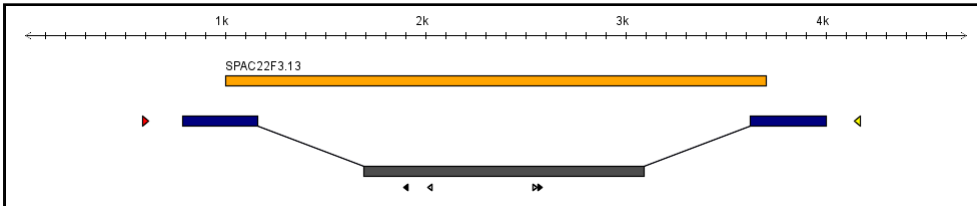

SPAC22F8.02c

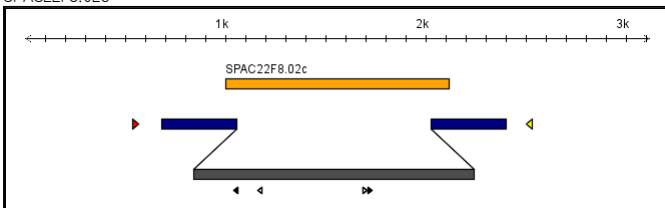

SPAC22F8.03c

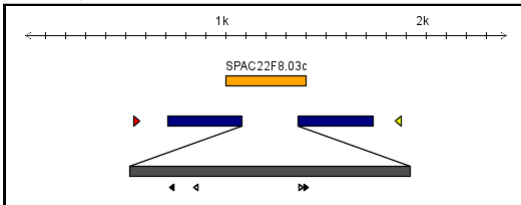

SPAC22F8.04

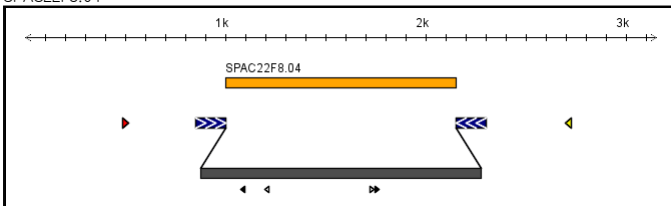

SPAC22F8.05

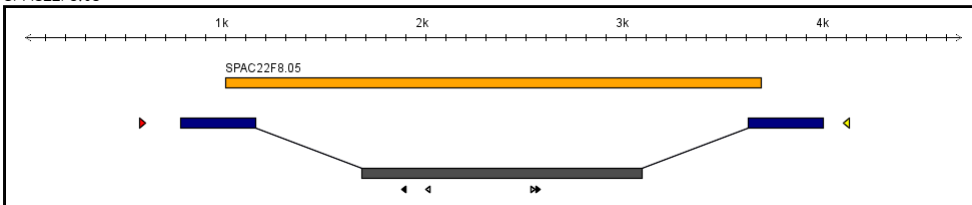

SPAC22F8.06

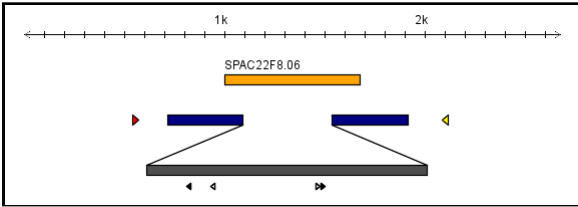

SPAC22F8.07c

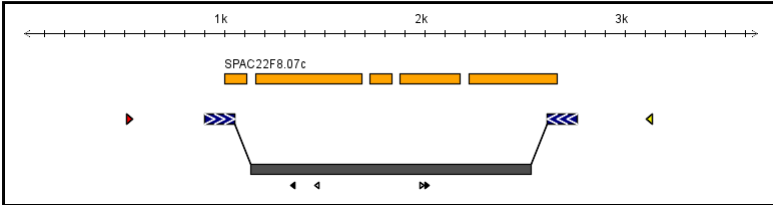

SPAC22F8.09

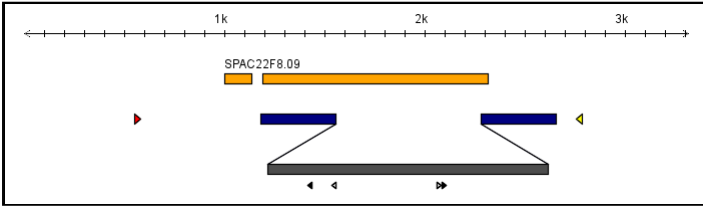

SPAC22F8.10c

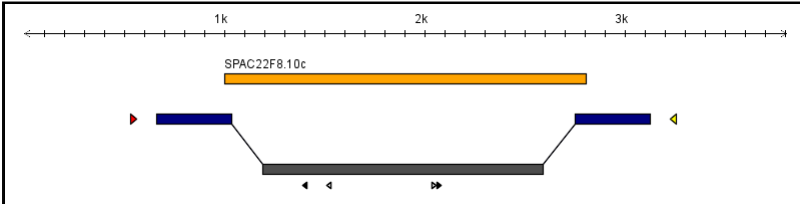

SPAC22F8.11

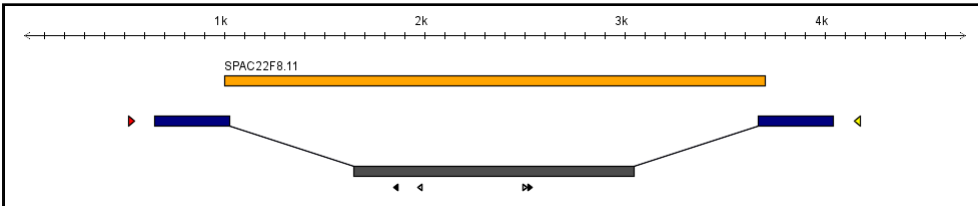

SPAC22F8.12c

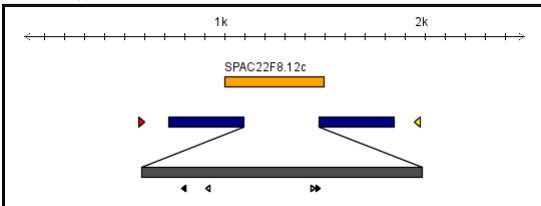

SPAC22G7.01c

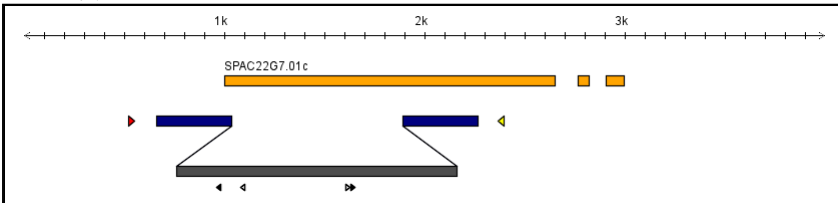

SPAC22G7.03

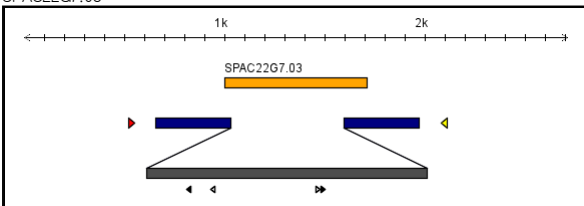

SPAC22G7.05

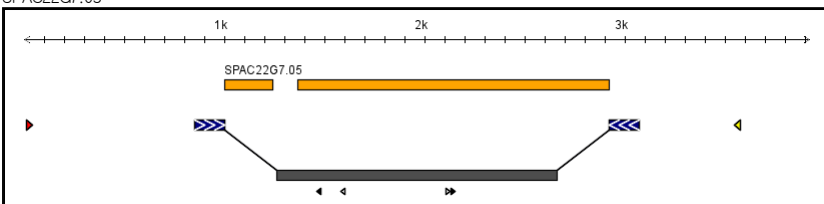

SPAC22G7.07c

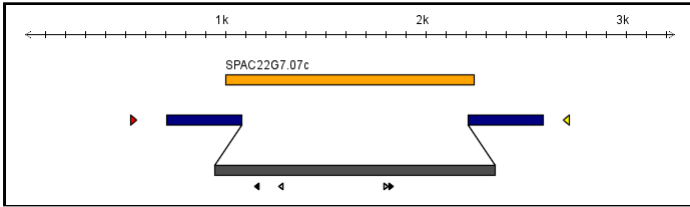

SPAC22G7.08

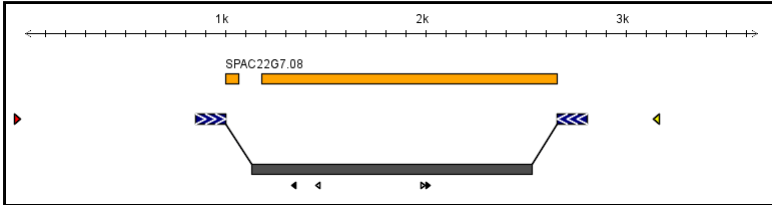

SPAC22G7.09c

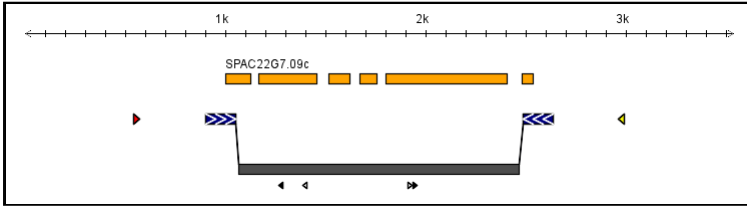

SPAC22G7.10

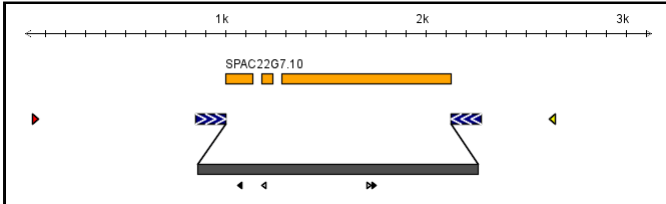

SPAC22H10.02

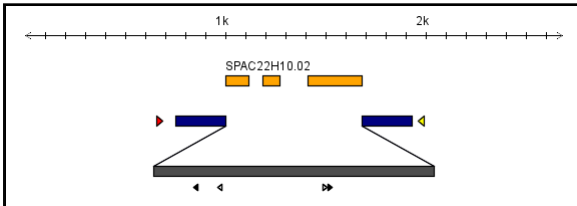

SPAC22H10.04

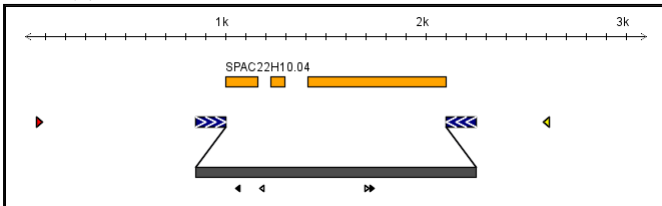

SPAC22H10.05c

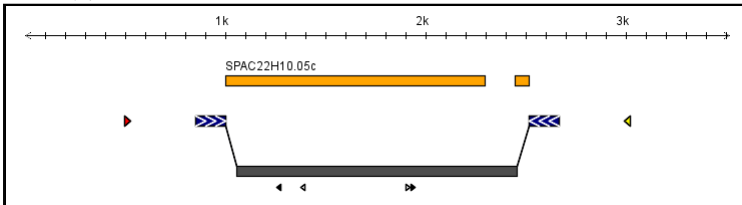

SPAC22H10.07

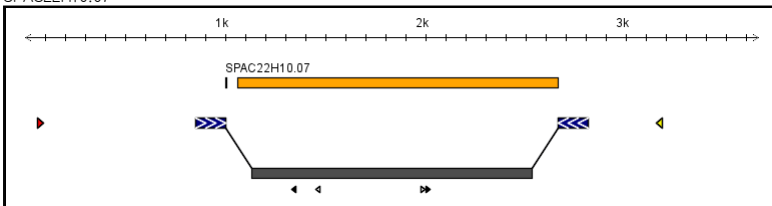

SPAC22H10.08

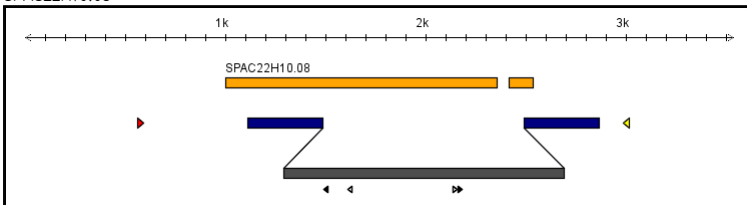

SPAC22H10.09

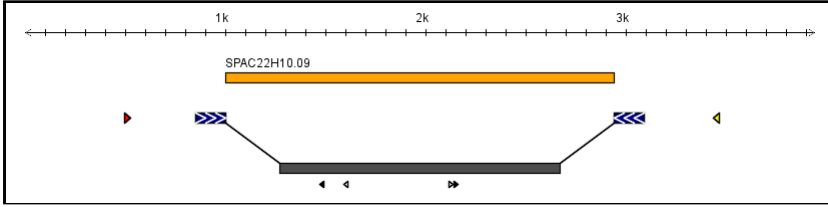

SPAC22H10.10

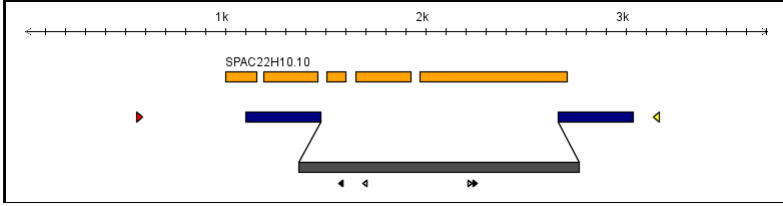

SPAC22H10.11c

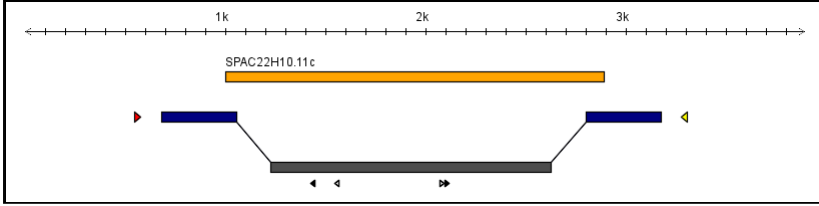

SPAC22H10.12c

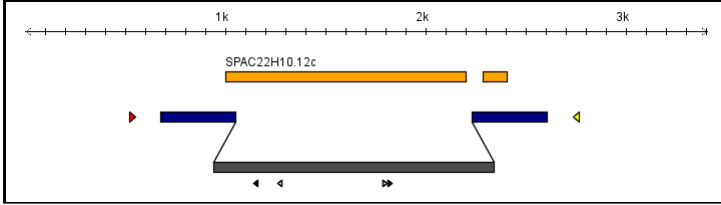

SPAC22H10.13

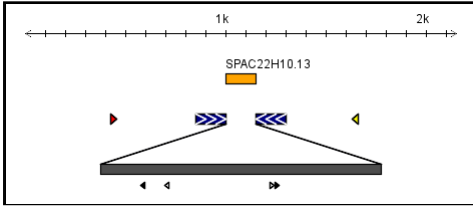

SPAC22H12.01c

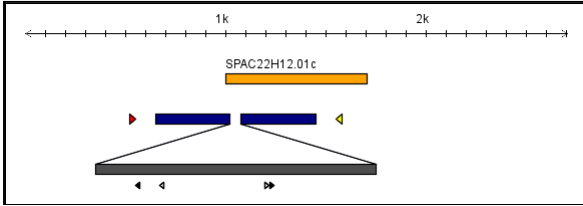

SPAC22H12.02

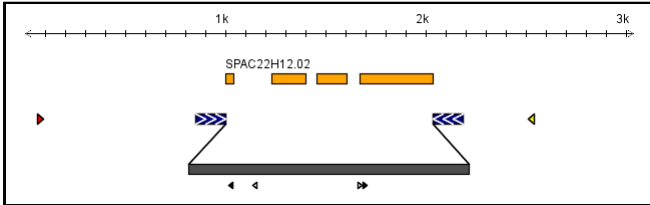

SPAC22H12.03

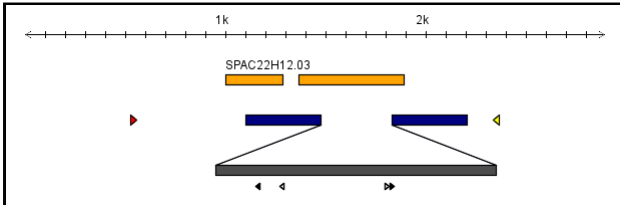

SPAC22H12.04c

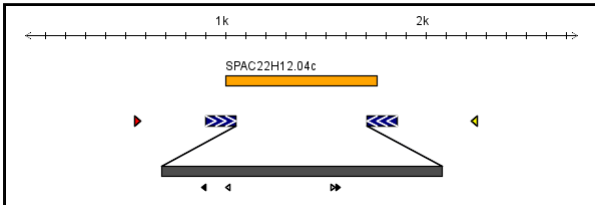

SPAC22H12.05c

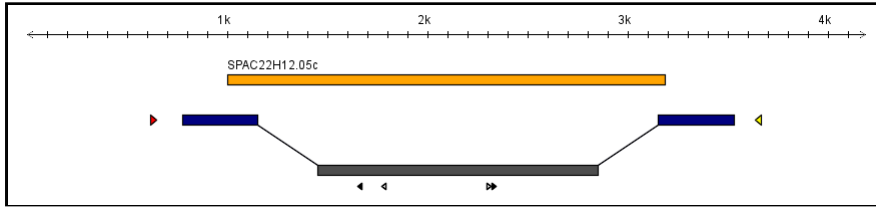

SPAC23A1.02c

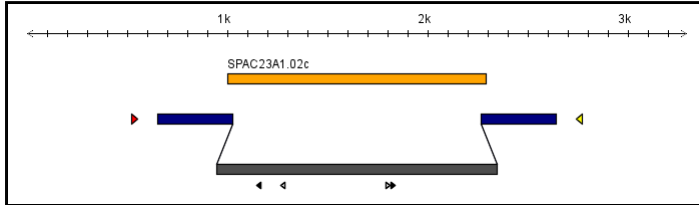

SPAC23A1.03

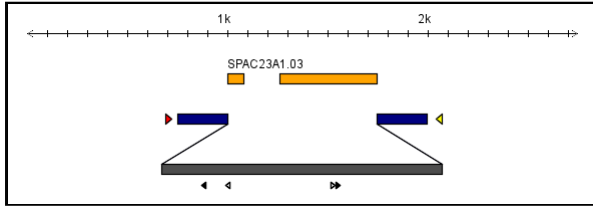

SPAC23A1.05

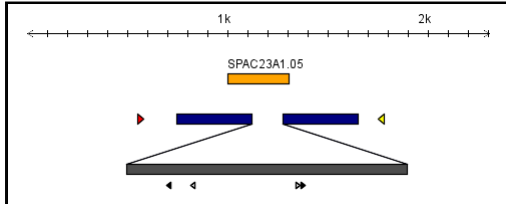

SPAC23A1.06c

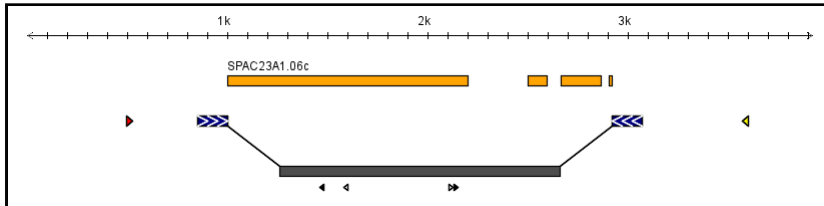

SPAC23A1.07

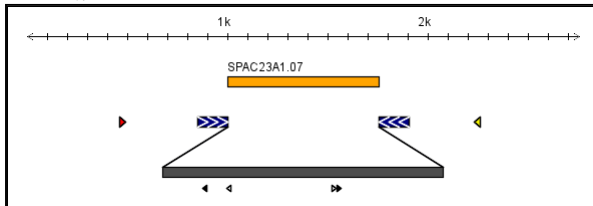

SPAC23A1.08c

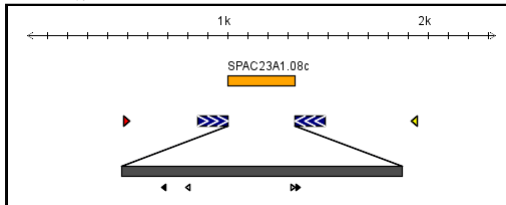

SPAC23A1.09

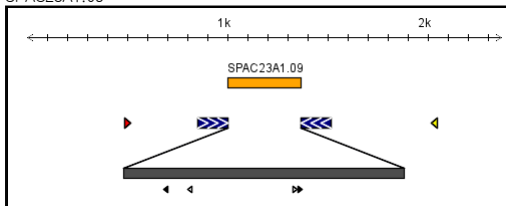

SPAC23A1.10

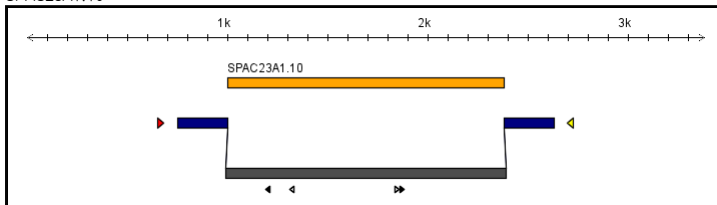

SPAC23A1.11

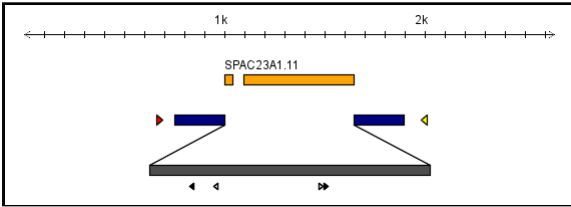

SPAC23A1.12c

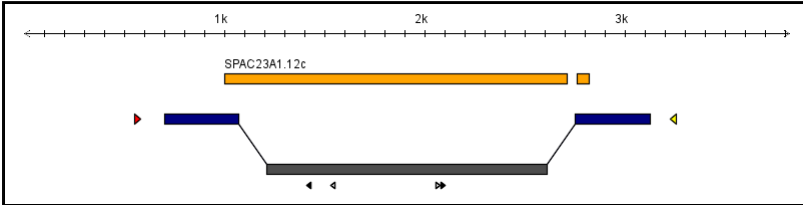

SPAC23A1.14c

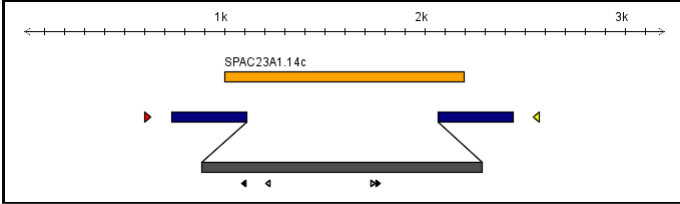

SPAC23A1.15c

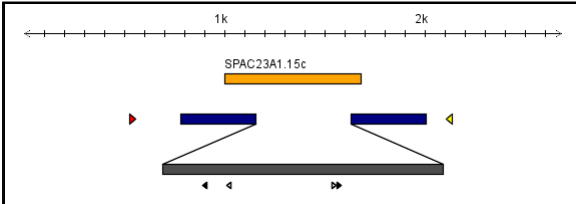

SPAC23A1.16c

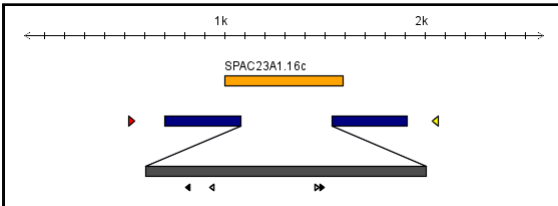

SPAC23A1.18c

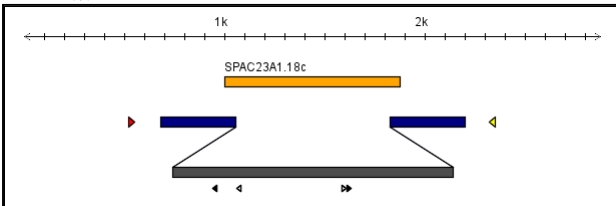

SPAC23A1.19c

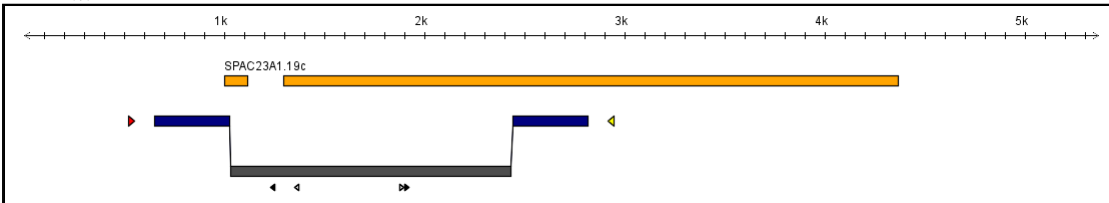

SPAC23C11.01

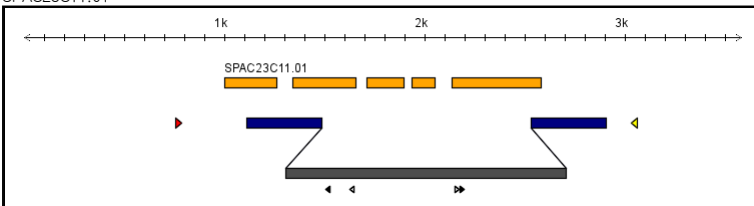

SPAC23C11.02c

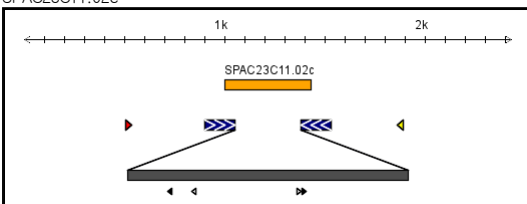

SPAC23C11.03

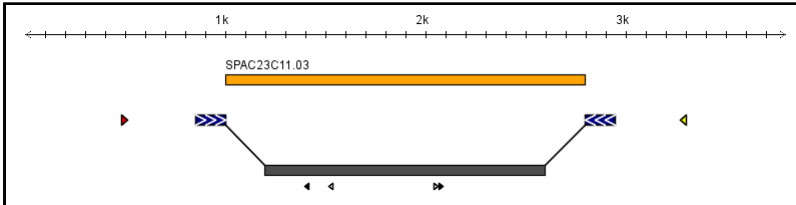

SPAC23C11.04c

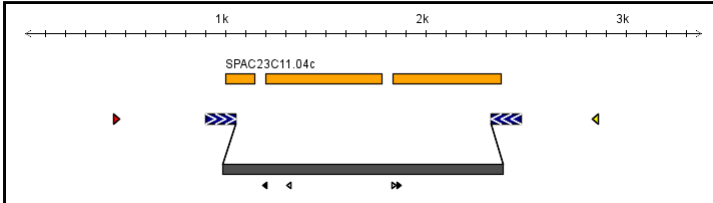

SPAC23C11.05

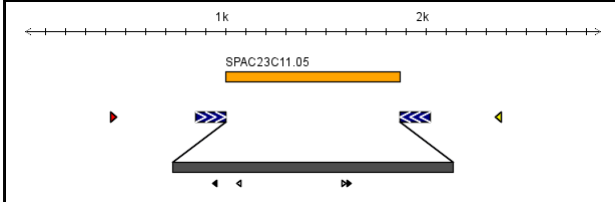

SPAC23C11.06c

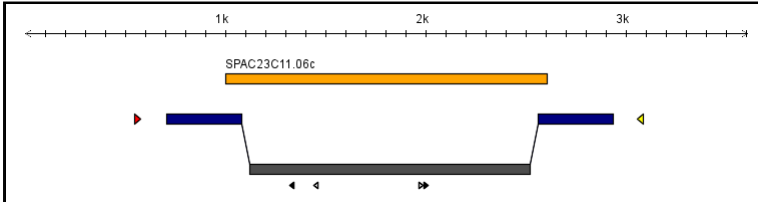

SPAC23C11.07

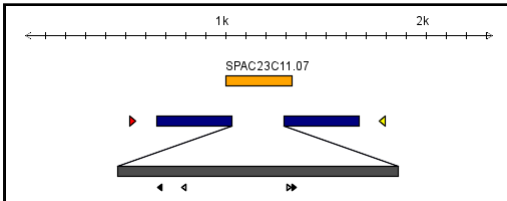

SPAC23C11.08

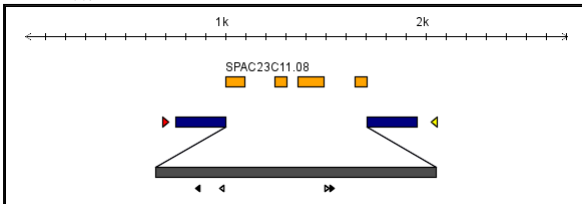

SPAC23C11.11

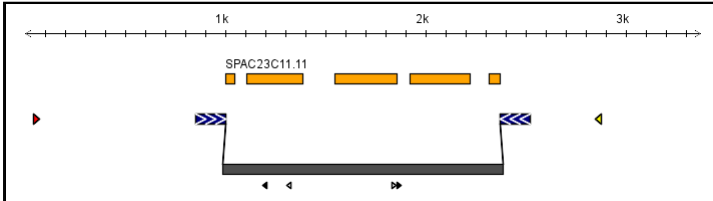

SPAC23C11.12

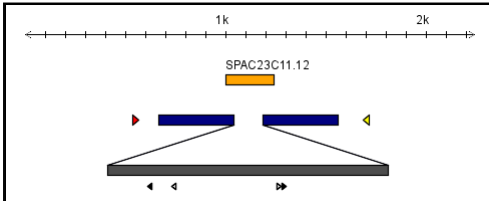

SPAC23C11.13c

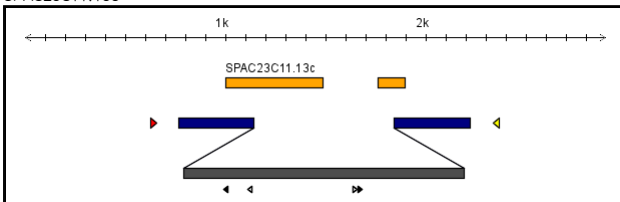



SPAC23C11.14

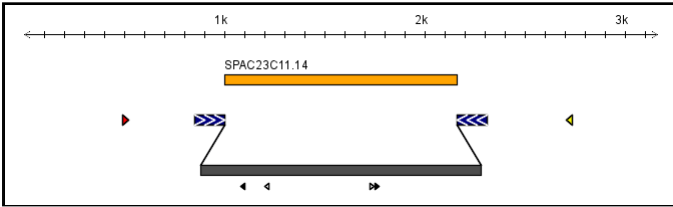

SPAC23C11.16

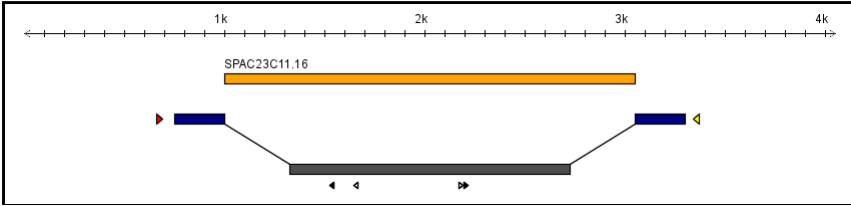

SPAC23C11.17

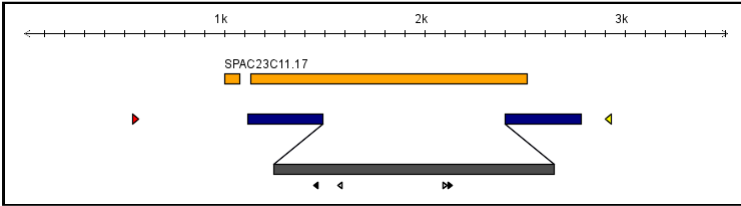

SPAC23C4.02

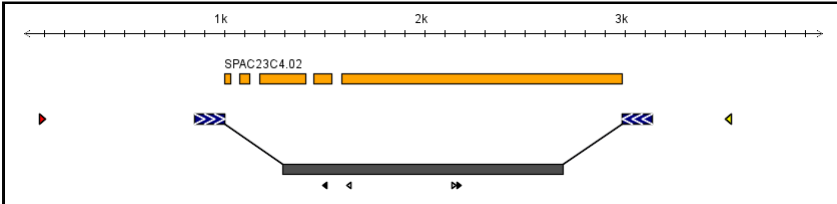

SPAC23C4.03

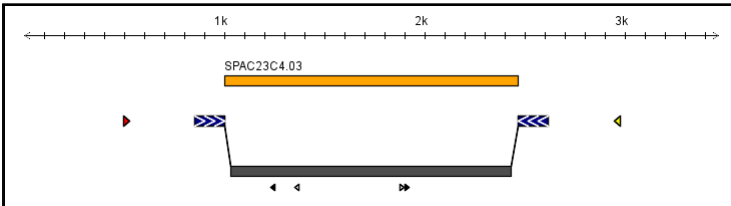

SPAC23C4.05c

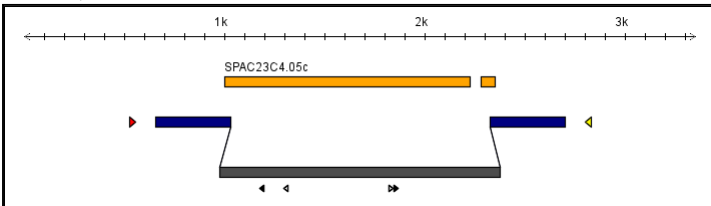

SPAC23C4.06c

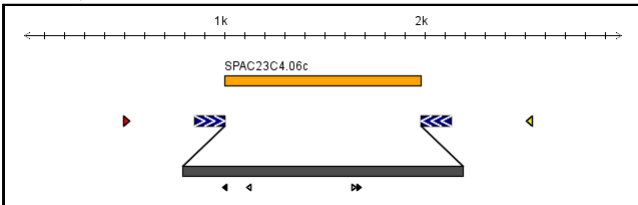

SPAC23C4.07

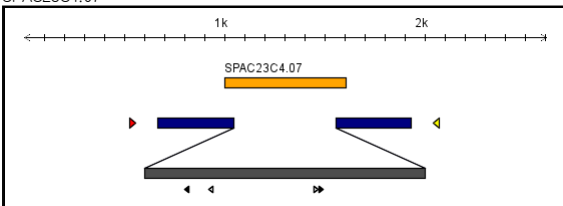

SPAC23C4.08

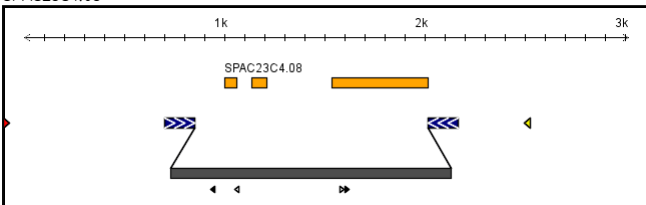

SPAC23C4.09c

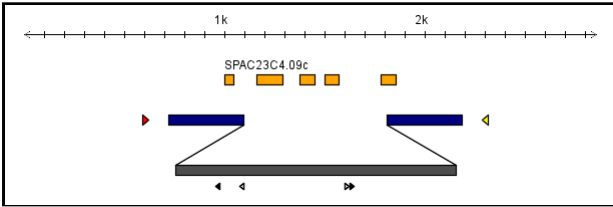

SPAC23C4.10

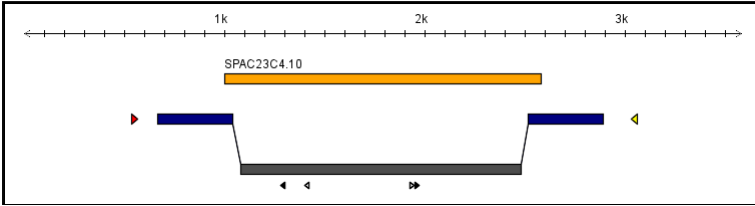

SPAC23C4.11

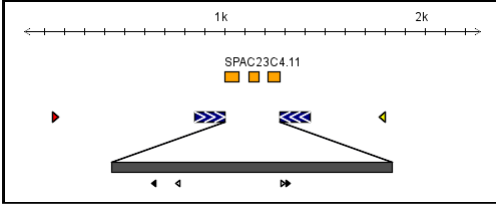

SPAC23C4.12

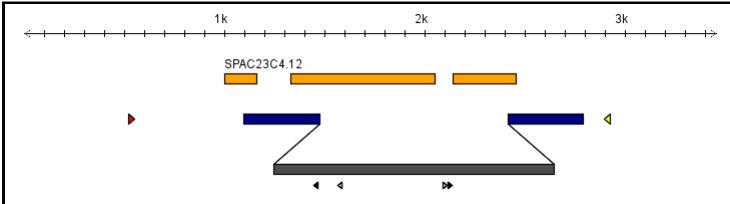

SPAC23C4.13

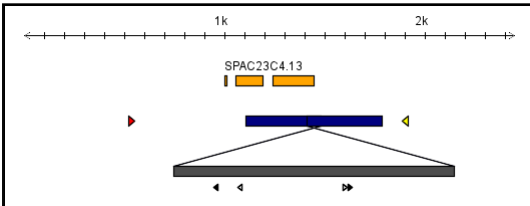

SPAC23C4.14

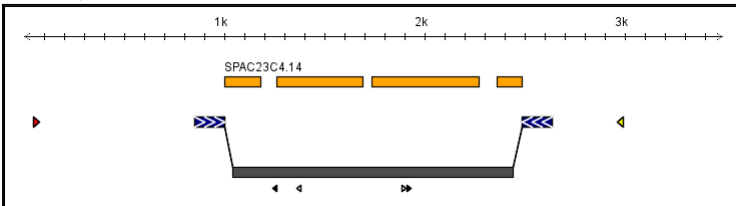

SPAC23C4.15

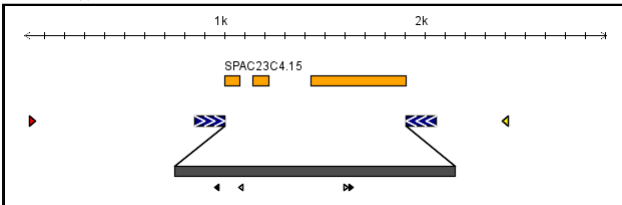

SPAC23C4.16c

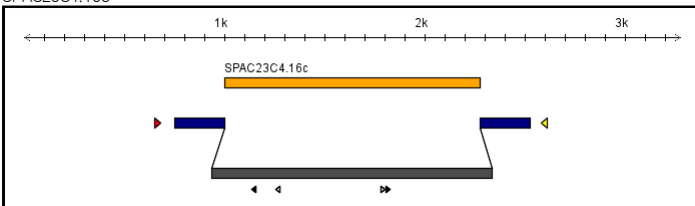

SPAC23C4.17

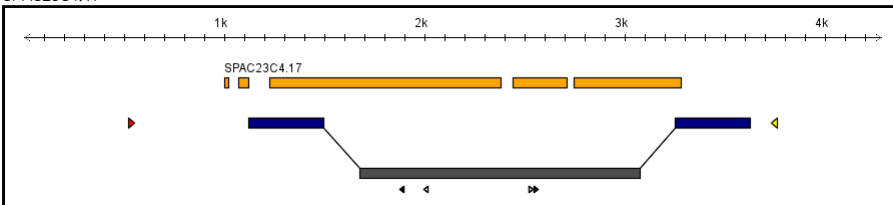

SPAC23C4.18c

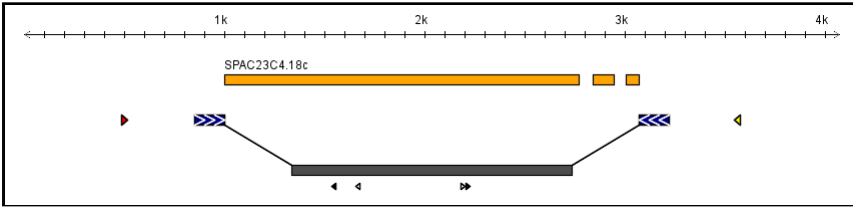

SPAC23C4.19

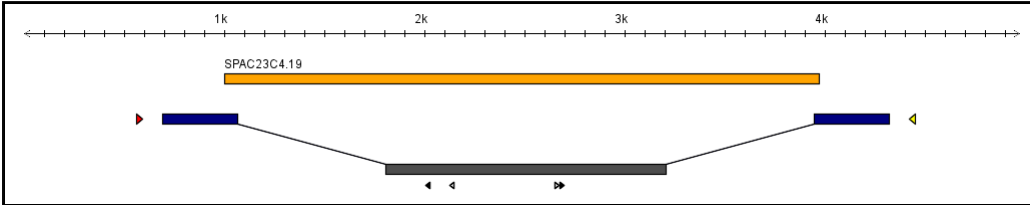

SPAC23D3.01

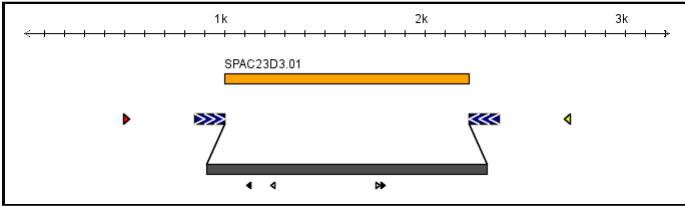

SPAC23D3.02

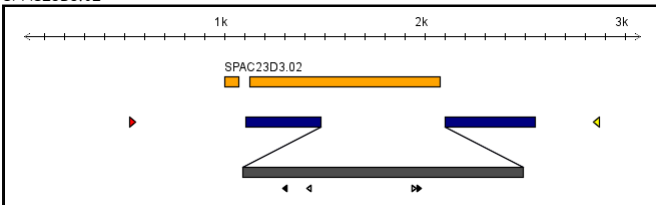

SPAC23D3.03c

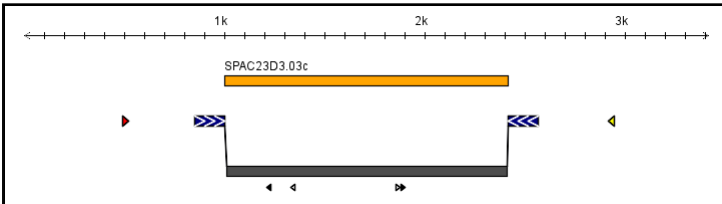

SPAC23D3.04c

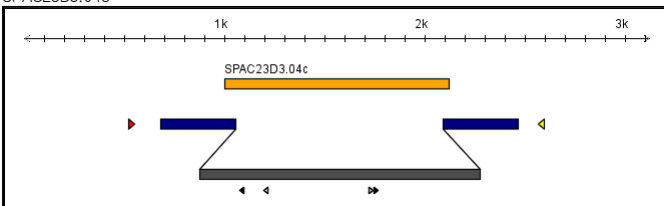

SPAC23D3.07

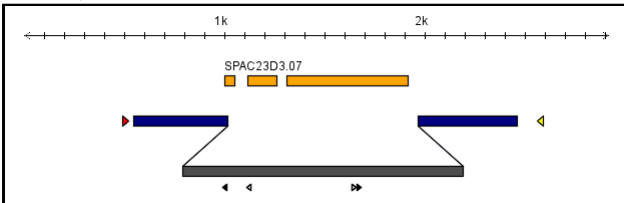

SPAC23D3.08

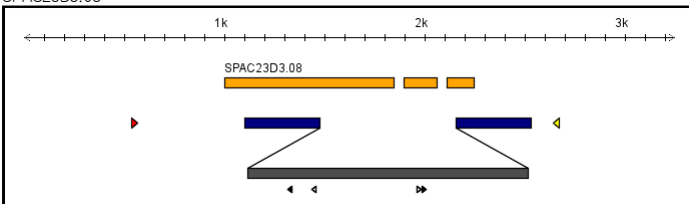

SPAC23D3.09

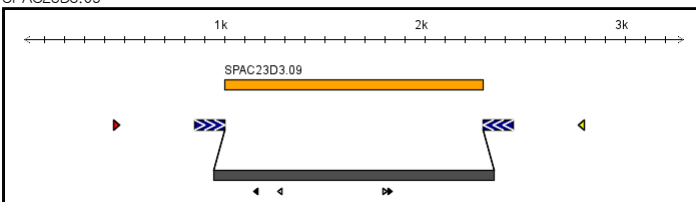

SPAC23D3.10c

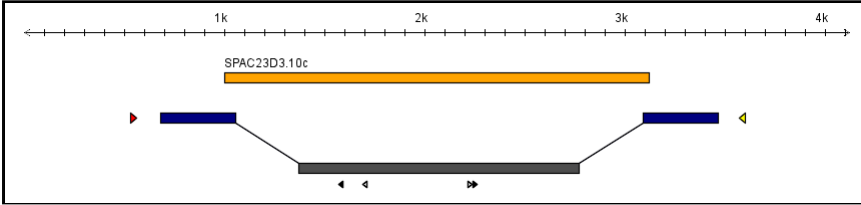

SPAC23D3.11

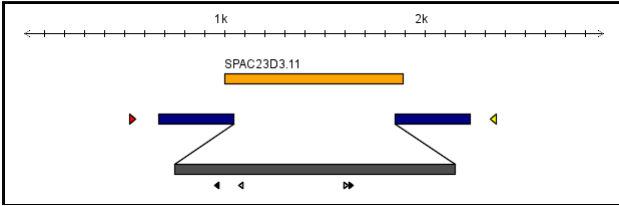

SPAC23D3.12

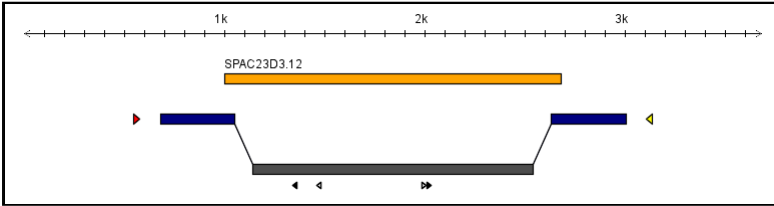

SPAC23E2.01

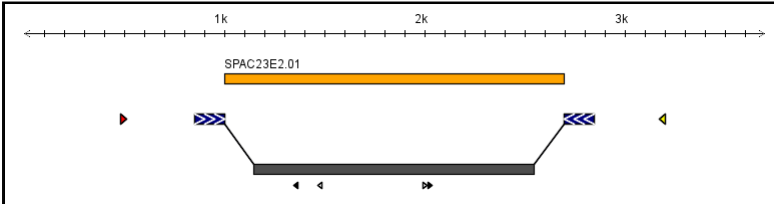

SPAC23E2.03c

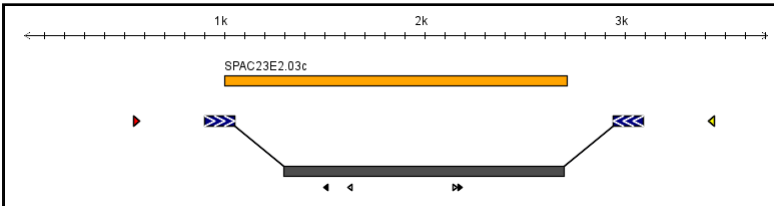

SPAC23G3.03

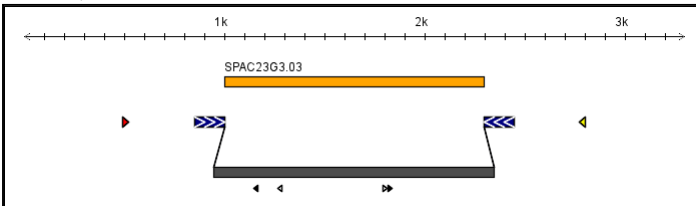

SPAC23G3.04

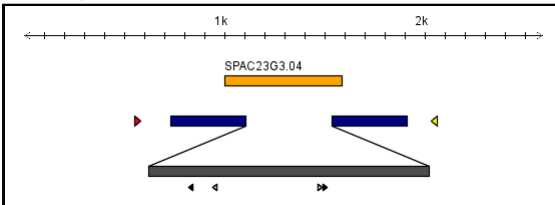

SPAC23G3.05c

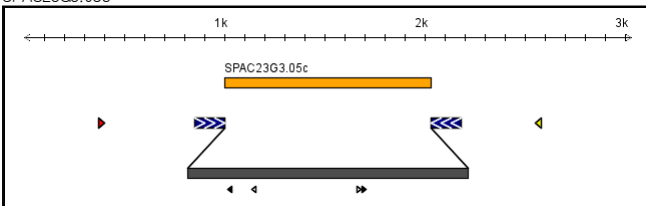

SPAC23G3.06

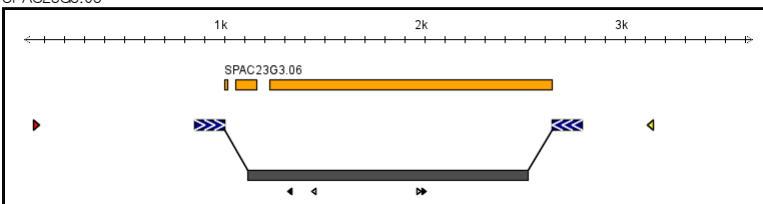

SPAC23G3.07c

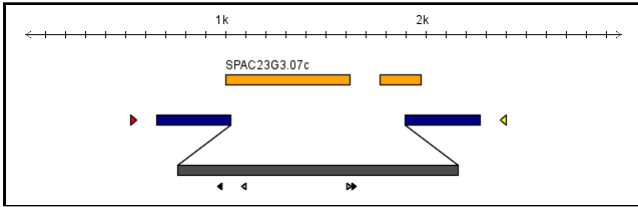

SPAC23G3.09

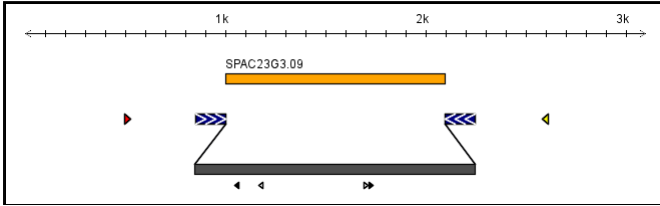

SPAC23G3.10c

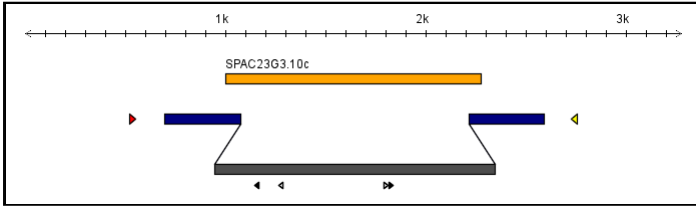

SPAC23G3.11

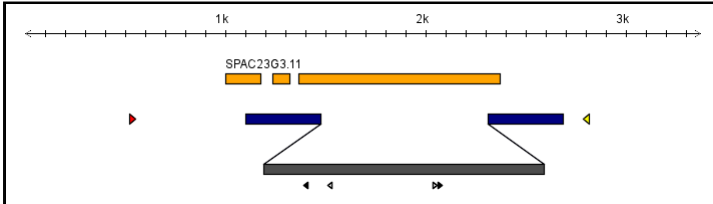

SPAC23G3.12c

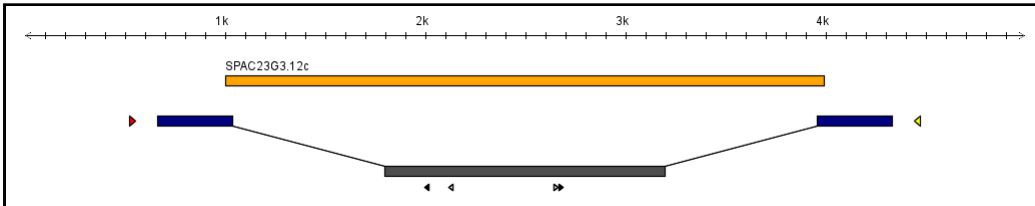

SPAC23H3.02c

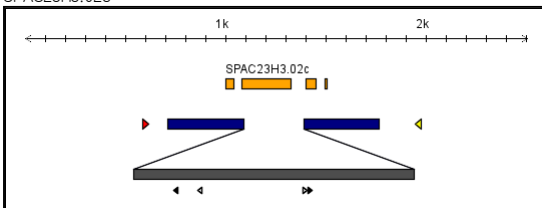

SPAC23H3.03c

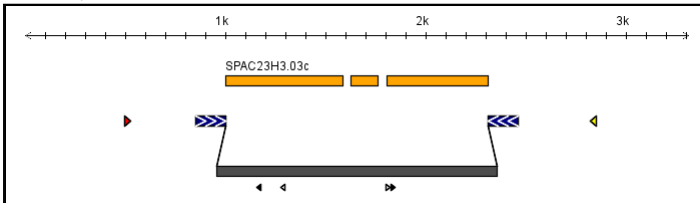

SPAC23H3.04

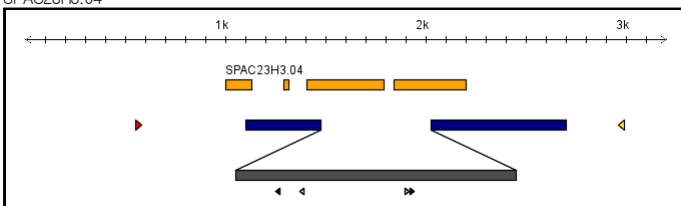

SPAC23H3.05c

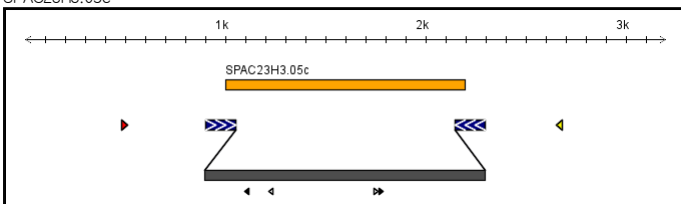

SPAC23H3.06

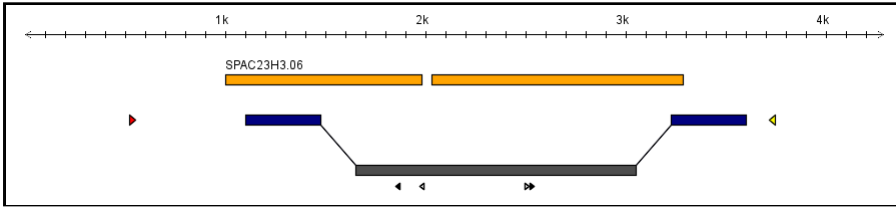

SPAC23H3.07c

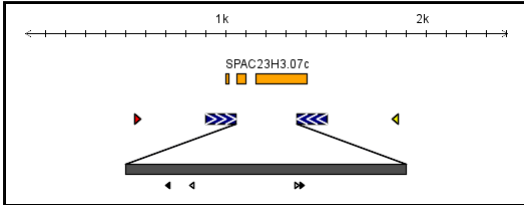

SPAC23H3.08c

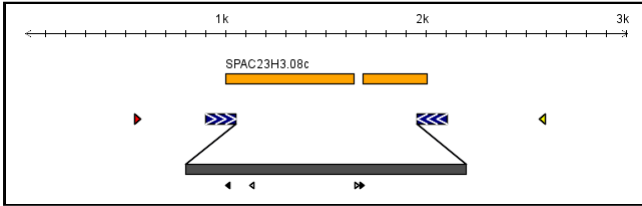

SPAC23H3.09c

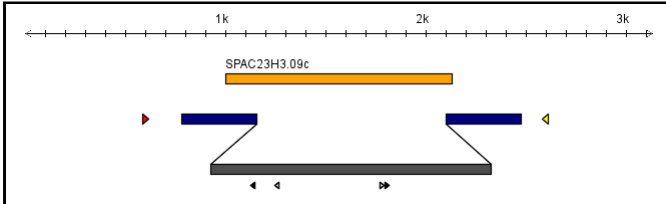

SPAC23H3.10

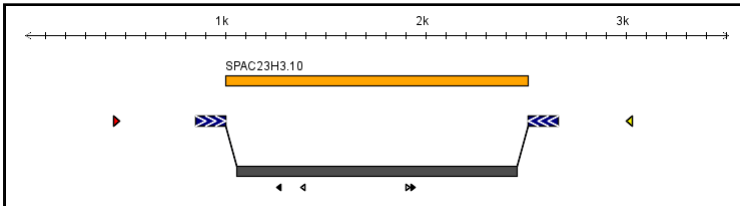

SPAC23H3.11c

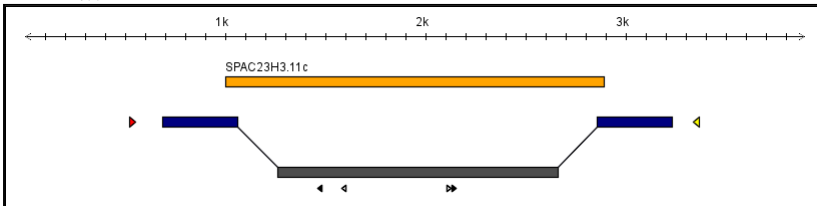

SPAC23H3.12c

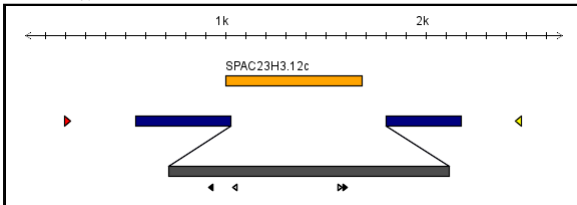

SPAC23H3.13c

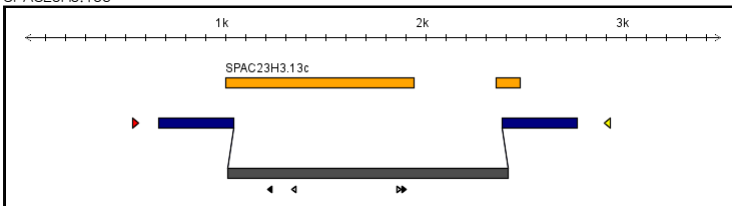

SPAC23H3.14

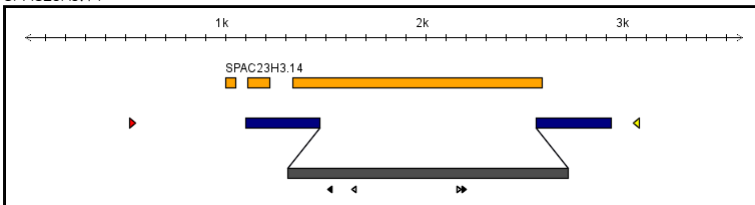

SPAC23H3.15c

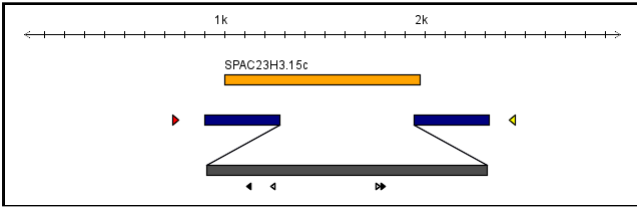

SPAC23H4.01c

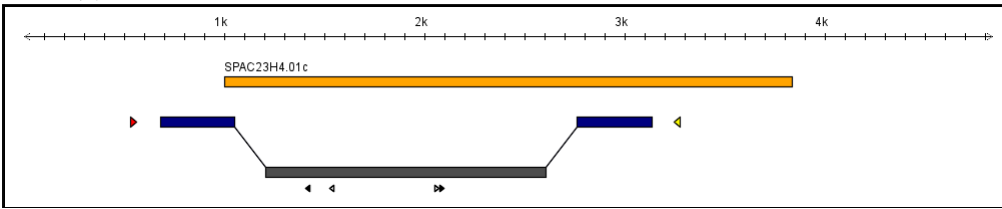

SPAC23H4.02

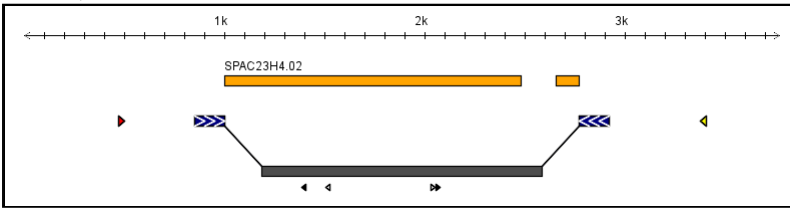

SPAC23H4.03c

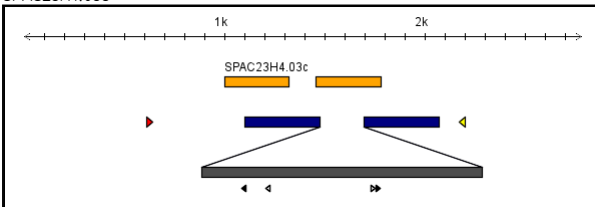

SPAC23H4.04

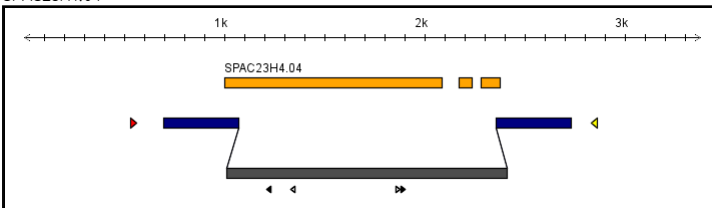

SPAC23H4.06

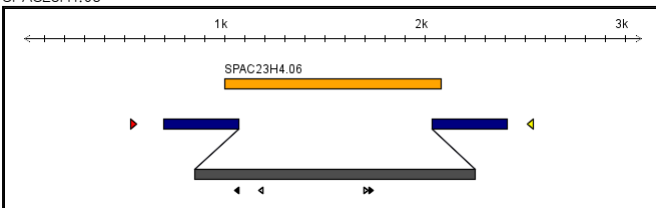

SPAC23H4.07c

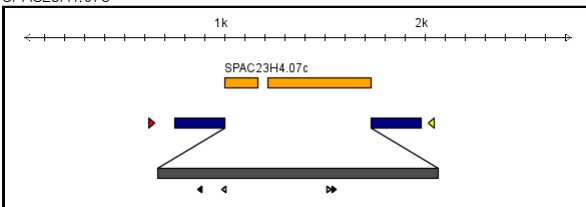

SPAC23H4.08

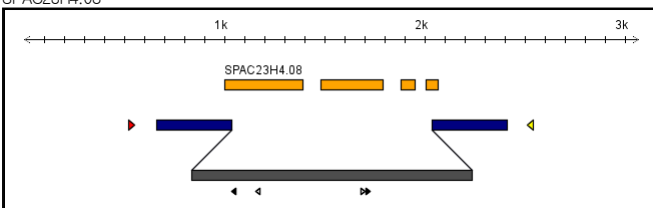

SPAC23H4.09

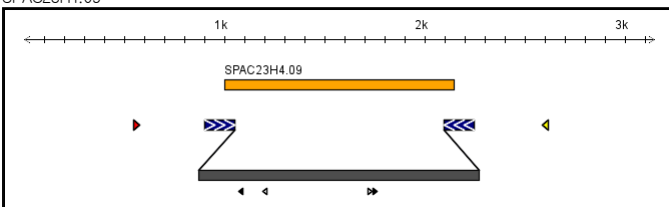

SPAC23H4.10c

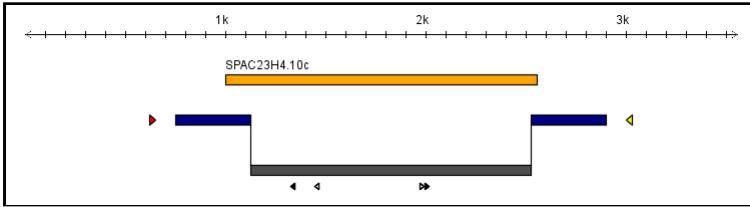

SPAC23H4.11c

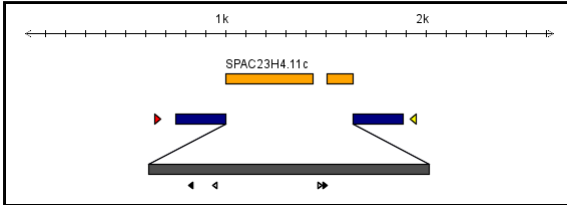

SPAC23H4.12

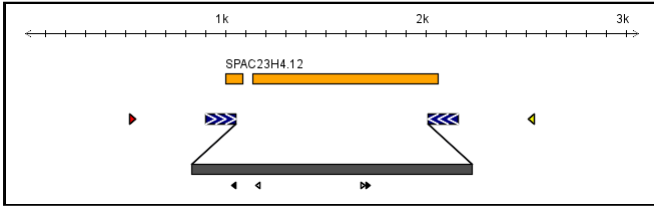

SPAC23H4.15

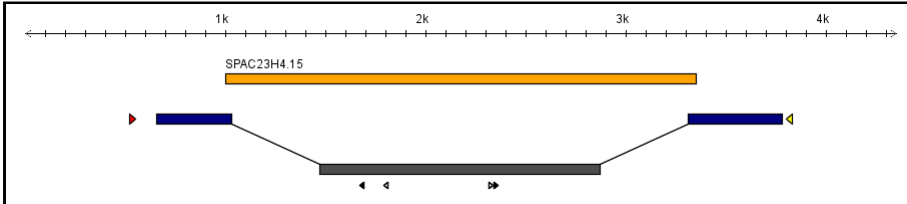

SPAC23H4.16c

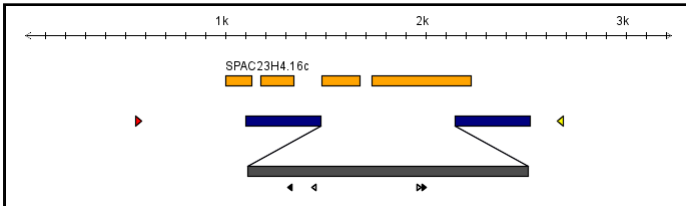

SPAC23H4.17c

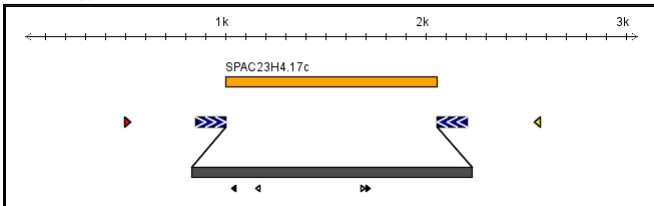

SPAC23H4.18c

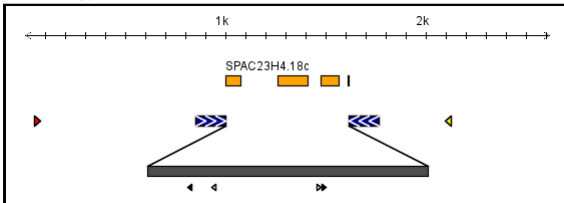

SPAC24B11.05

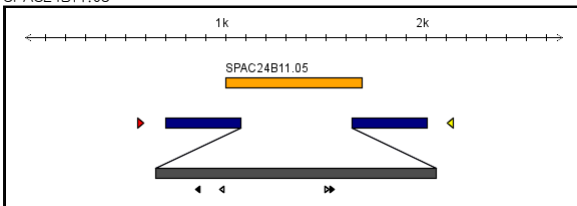

SPAC24B11.06c

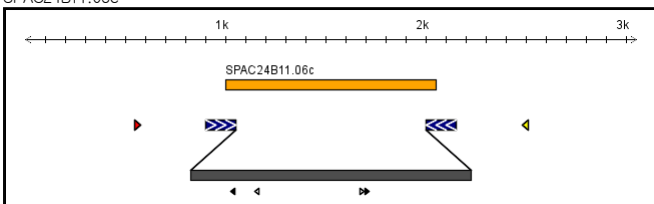



SPAC24B11.07c

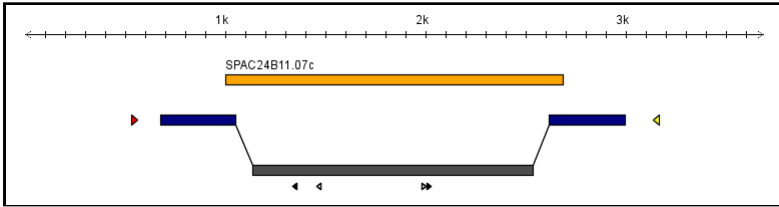

SPAC24B11.08c

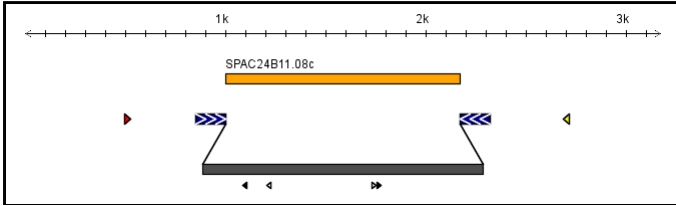

SPAC24B11.09

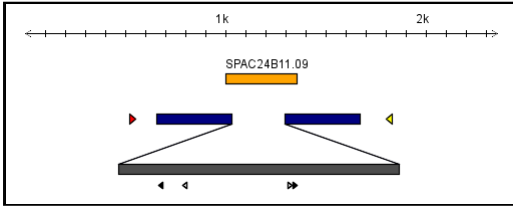

SPAC24B11.10c

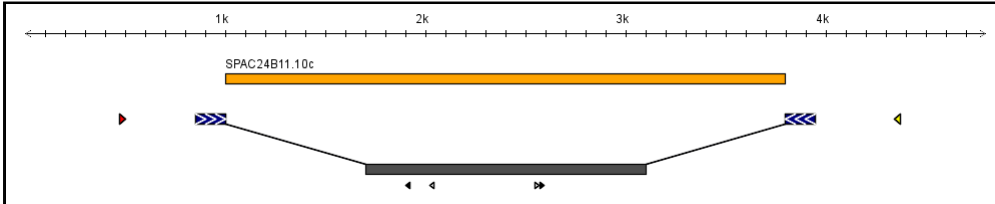

SPAC24B11.11c

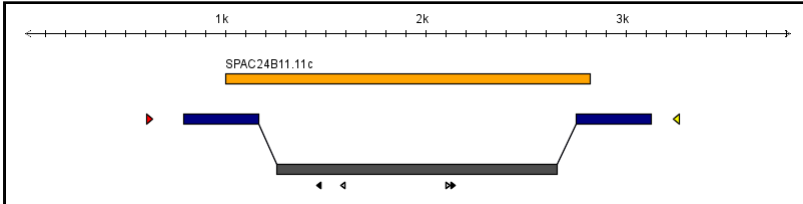

SPAC24C9.02c

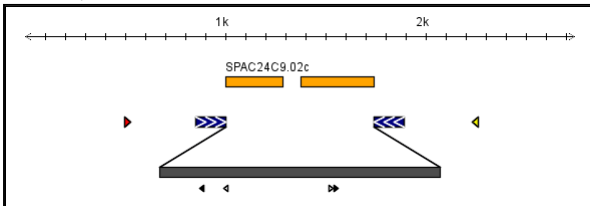

SPAC24C9.03

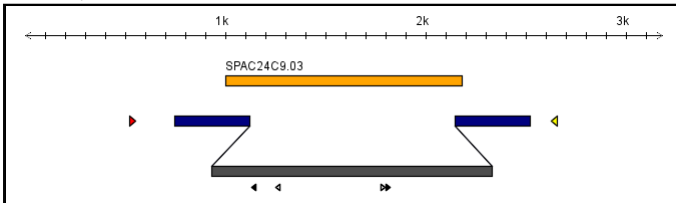

SPAC24C9.04

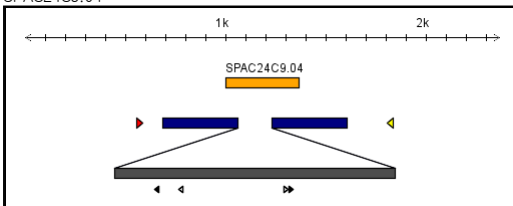

SPAC24C9.05c

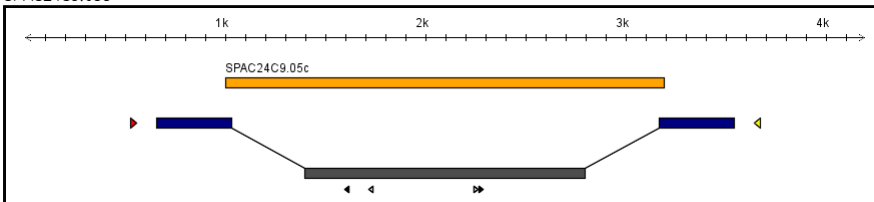

SPAC24C9.06c

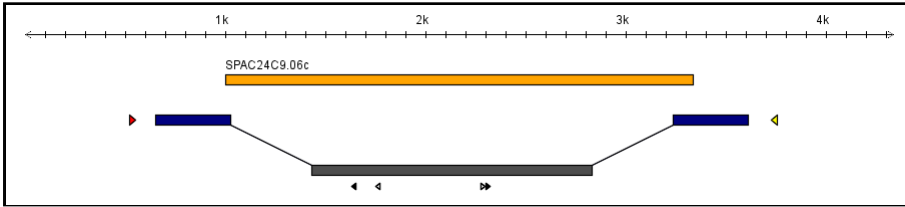

SPAC24C9.08

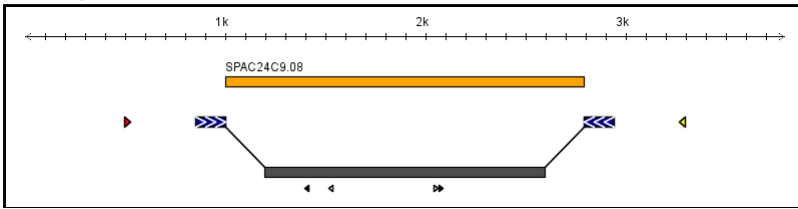

SPAC24C9.09

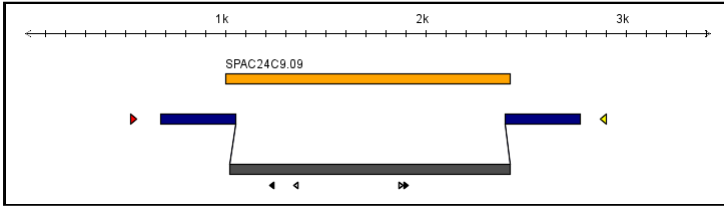

SPAC24C9.10c

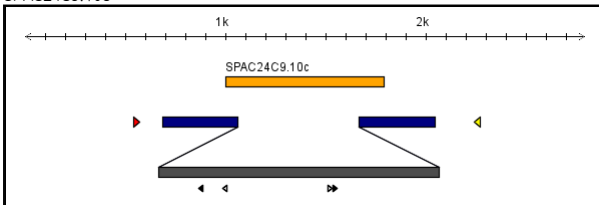

SPAC24C9.12c

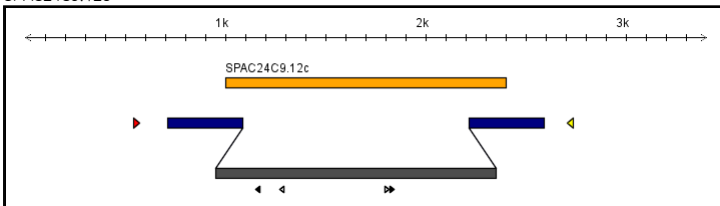

SPAC24C9.13c

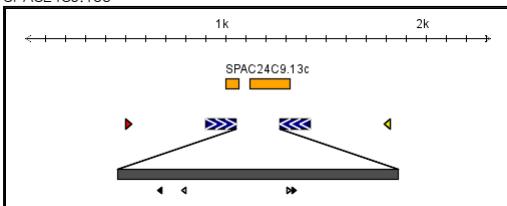

SPAC24C9.14

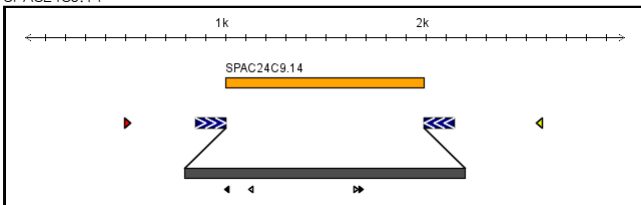

SPAC24C9.15c

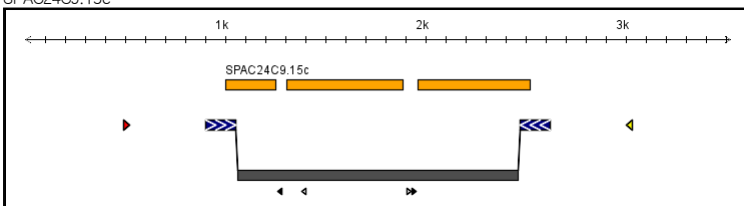

SPAC24C9.16c

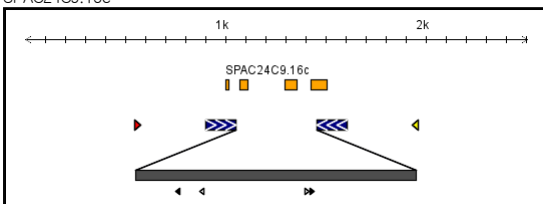

SPAC24H6.02c

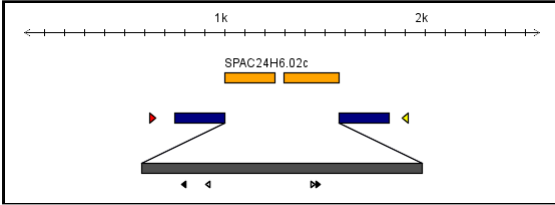

SPAC24H6.04

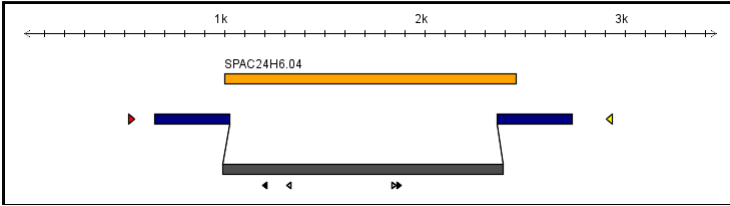

SPAC24H6.05

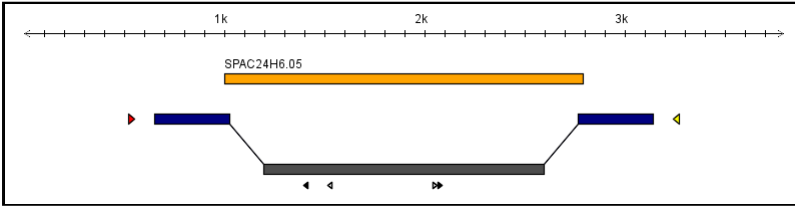

SPAC24H6.06

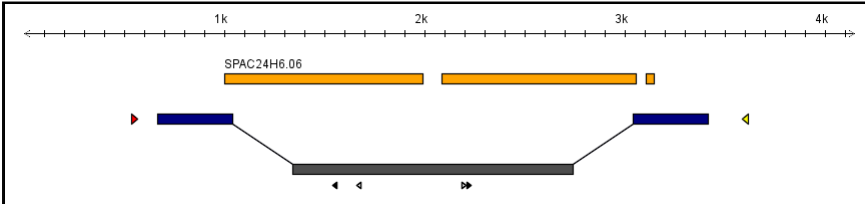

SPAC24H6.07

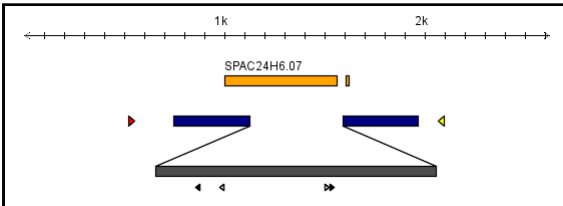

SPAC24H6.08

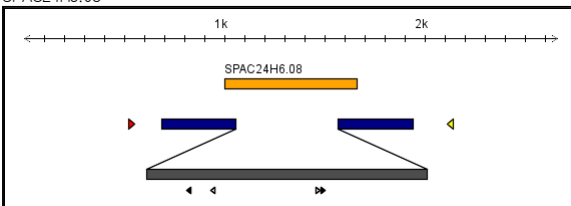

SPAC24H6.10c

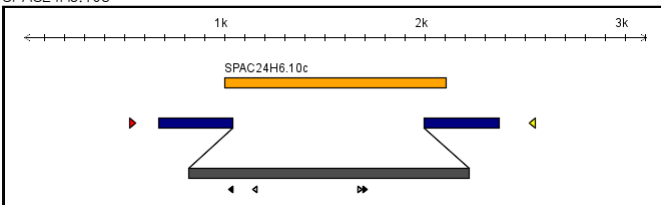

SPAC24H6.12c

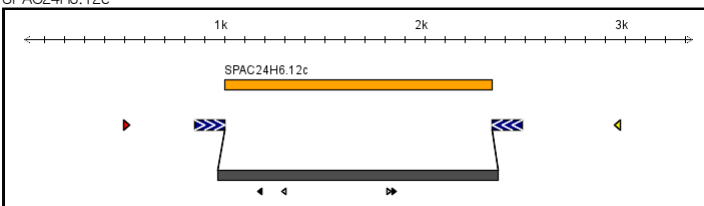

SPAC25A8.02

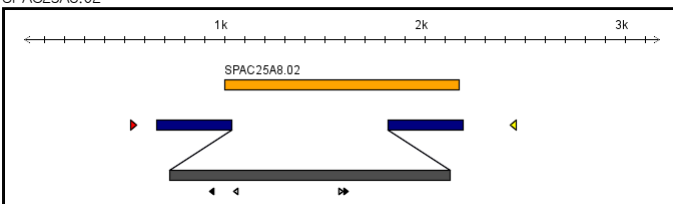

SPAC25A8.03c

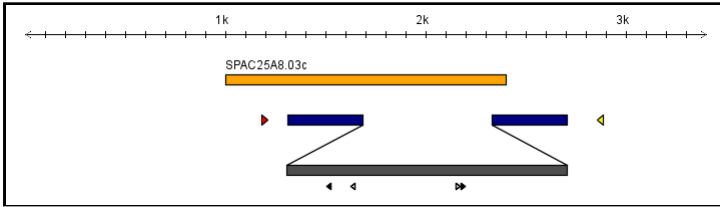

SPAC25B8.01

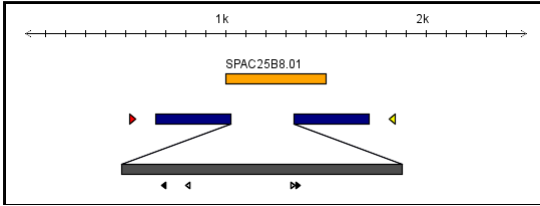

SPAC25B8.02

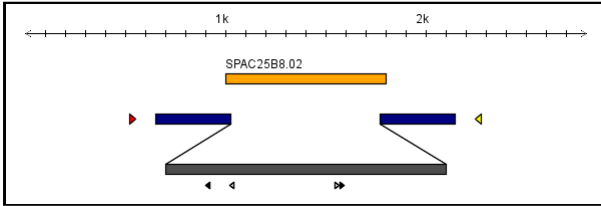

SPAC25B8.03

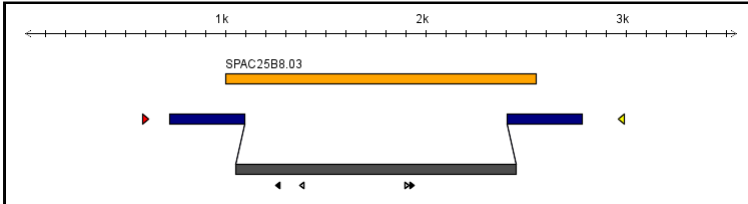

SPAC25B8.04c

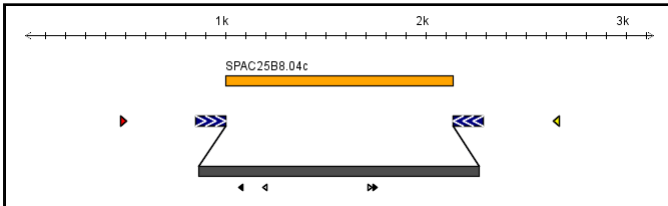

SPAC25B8.05

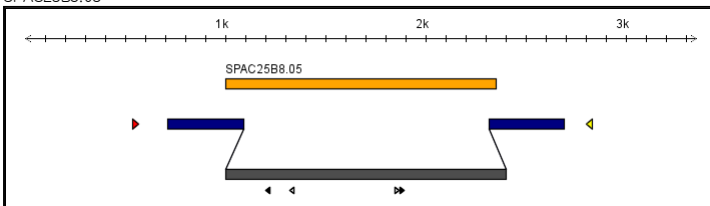

SPAC25B8.06c

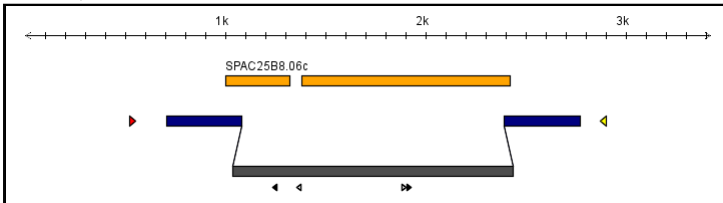

SPAC25B8.07c

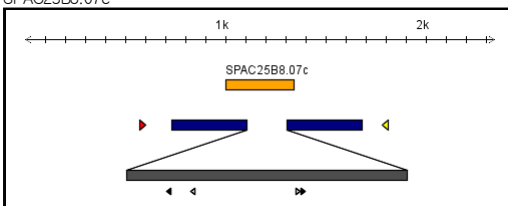

SPAC25B8.08

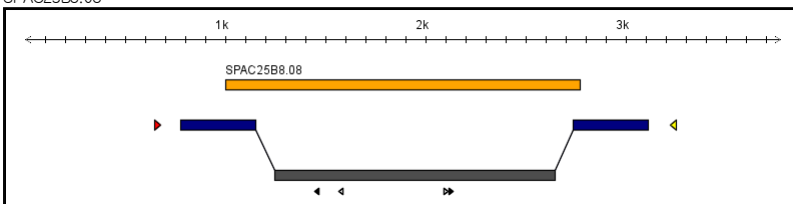

SPAC25B8.09

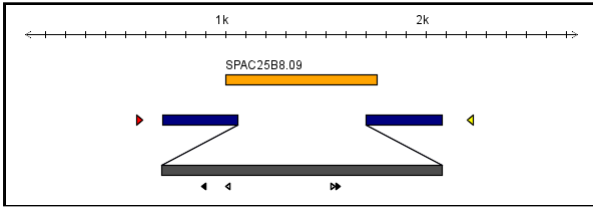

SPAC25B8.10

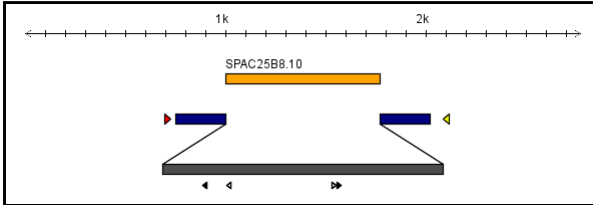

SPAC25B8.11

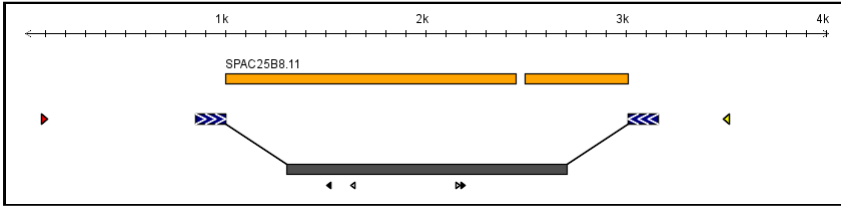

SPAC25B8.12c

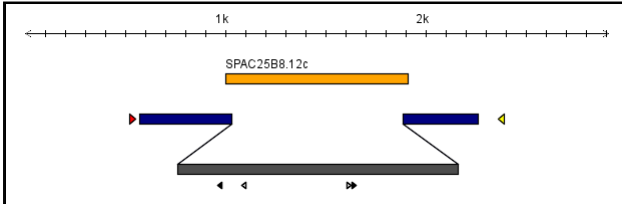

SPAC25B8.13c

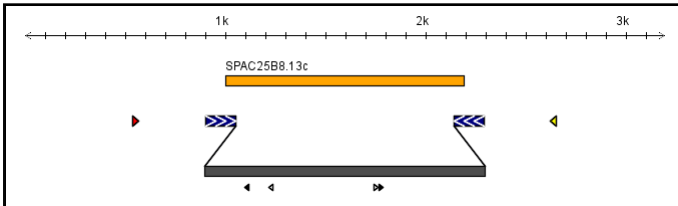

SPAC25B8.14

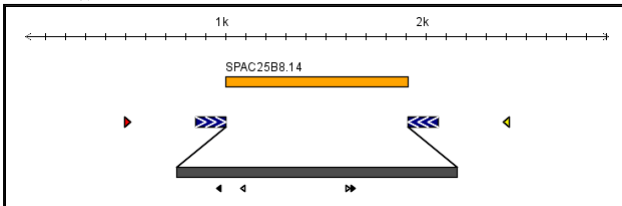

SPAC25B8.15c

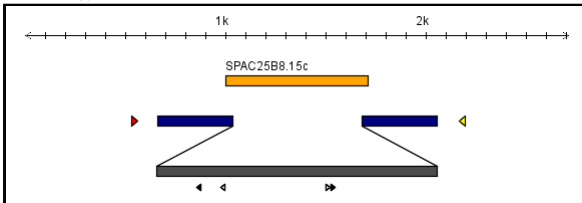

SPAC25B8.16

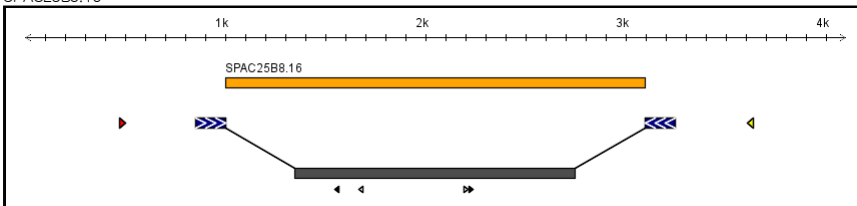

SPAC25B8.17

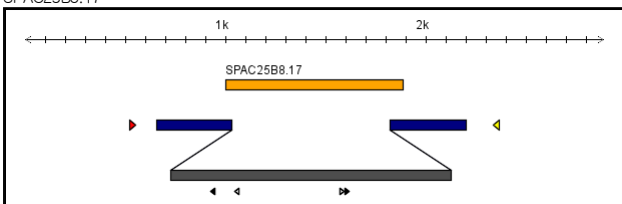

SPAC25B8.18

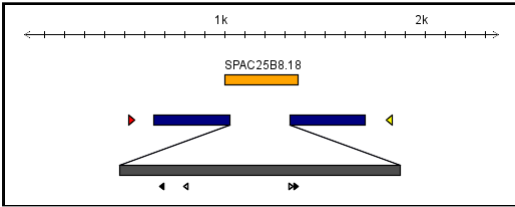

SPAC25B8.19c

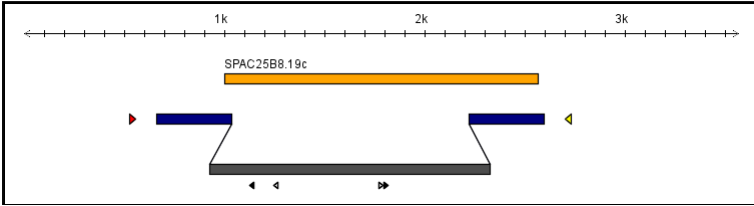

SPAC25G10.01

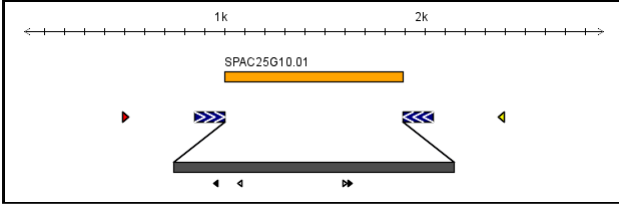

SPAC25G10.02

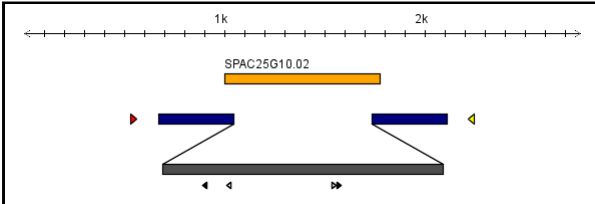

SPAC25G10.03

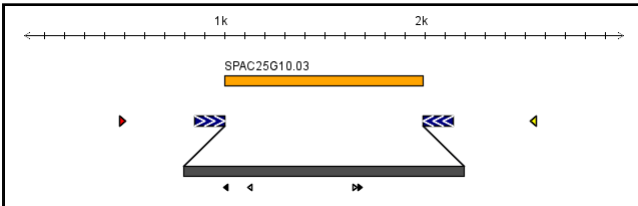

SPAC25G10.05c

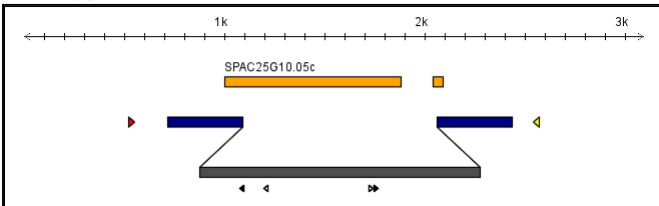

SPAC25G10.06

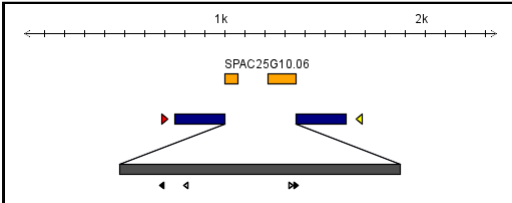

SPAC25H1.02

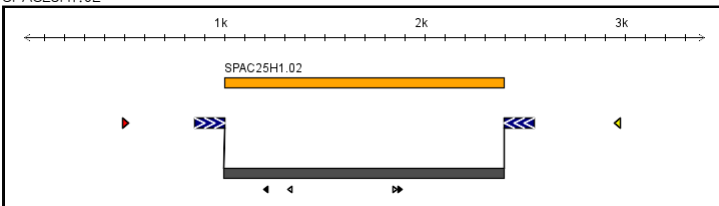

SPAC25H1.03

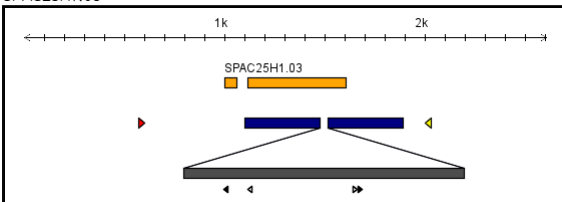

SPAC25H1.04

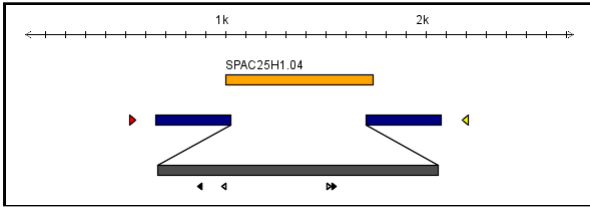

SPAC25H1.05

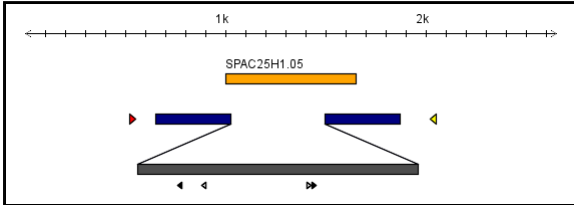

SPAC25H1.06

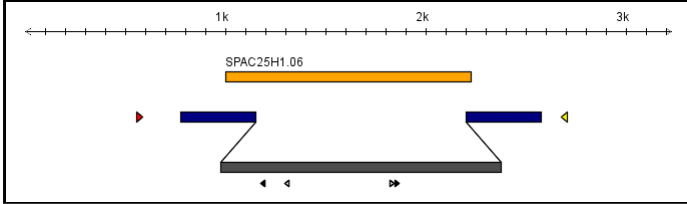

SPAC25H1.08c

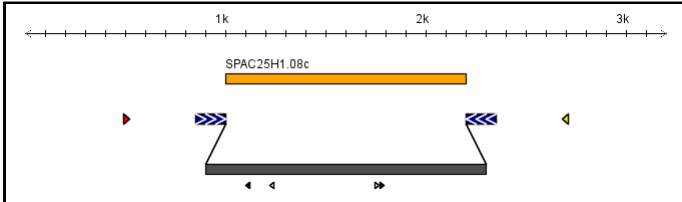

SPAC25H1.09

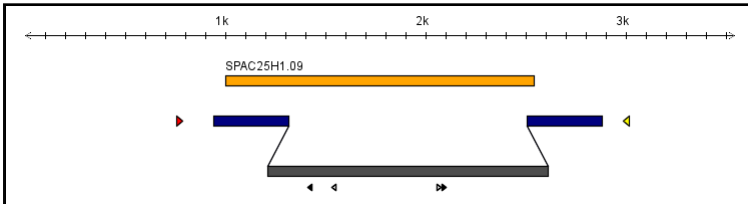

SPAC26A3.01

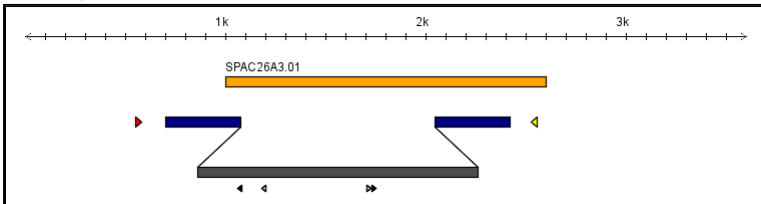

SPAC26A3.02

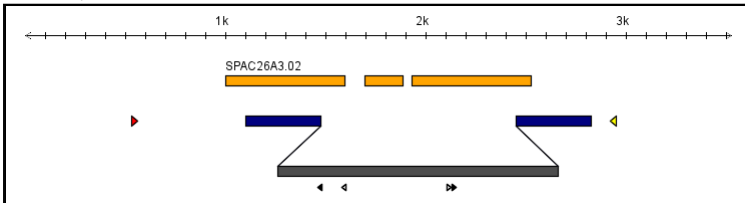

SPAC26A3.03c

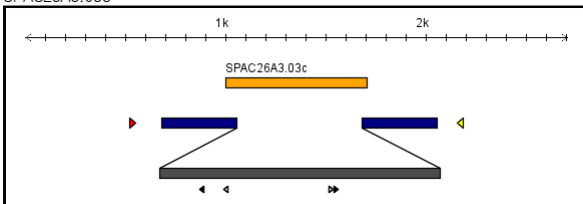

SPAC26A3.04

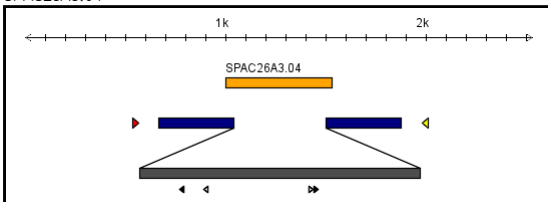

SPAC26A3.06

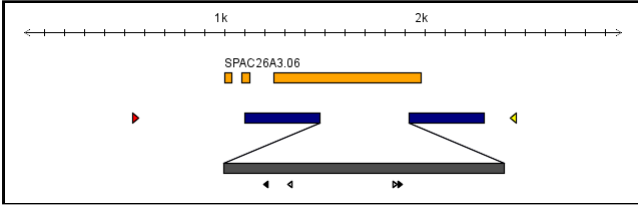

SPAC26A3.07c

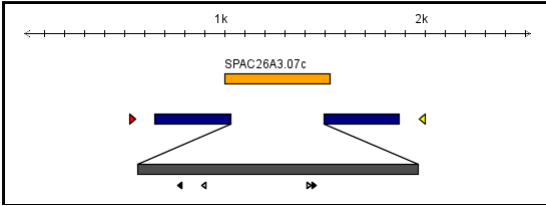

SPAC26A3.10

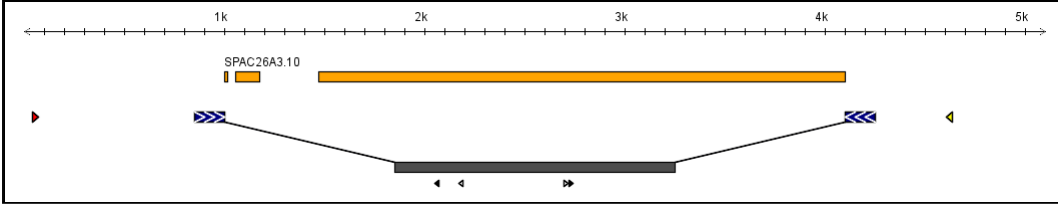

SPAC26A3.11

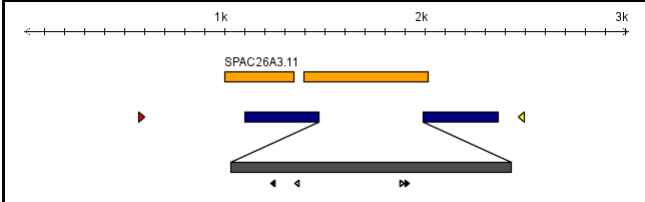

SPAC26A3.14c

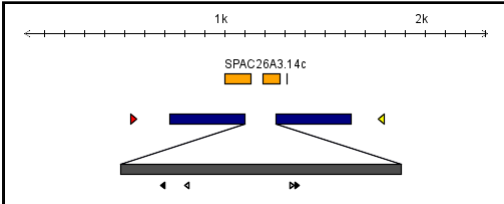

SPAC26A3.15c

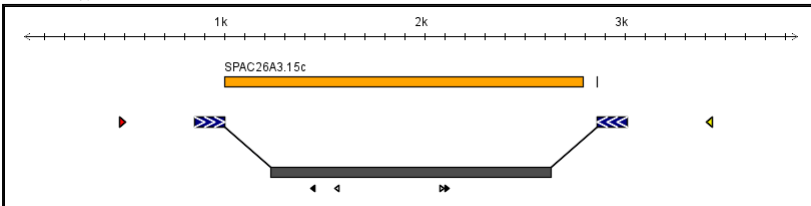

SPAC26A3.16

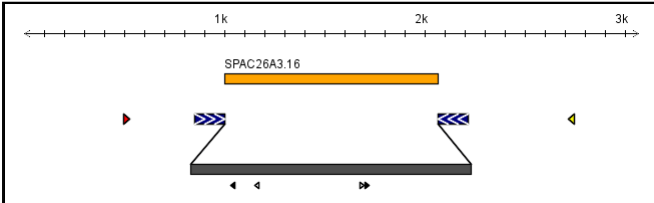

SPAC26F1.01

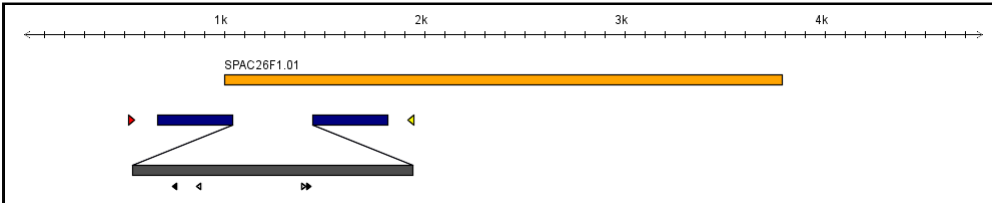

SPAC26F1.02

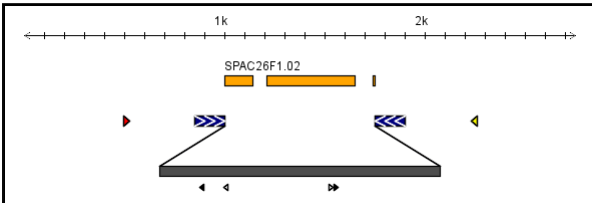



SPAC26F1.03

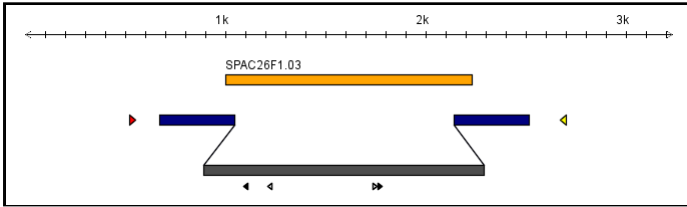

SPAC26F1.04c

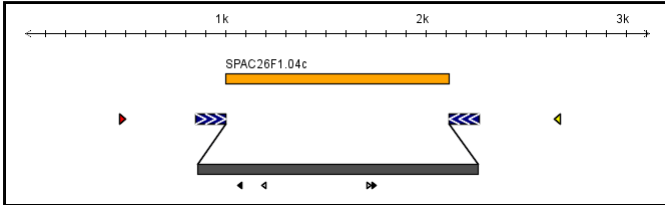

SPAC26F1.05

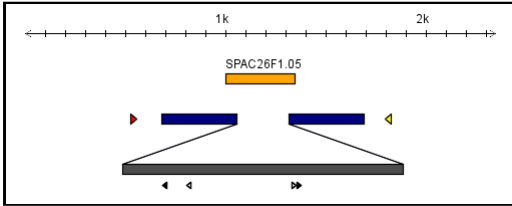

SPAC26F1.06

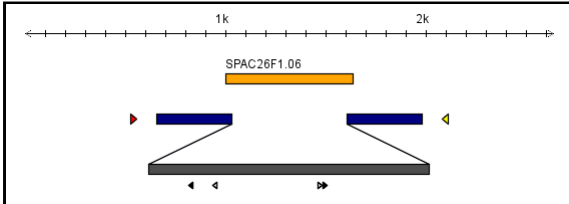

SPAC26F1.07

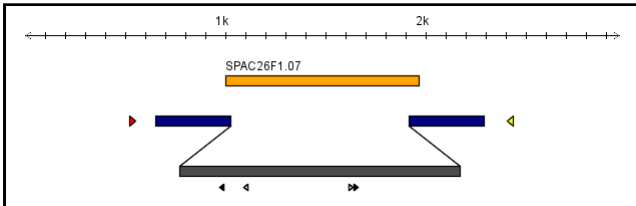

SPAC26F1.10c

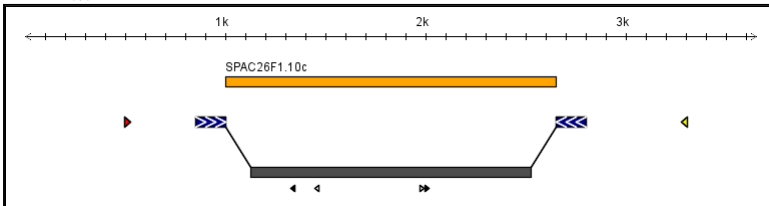

SPAC26F1.12c

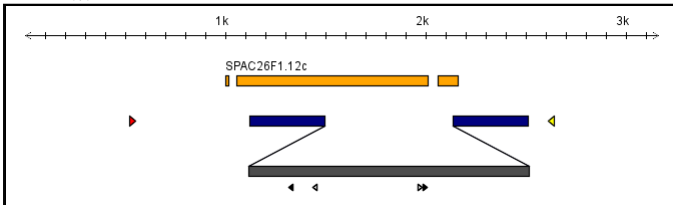

SPAC26F1.13c

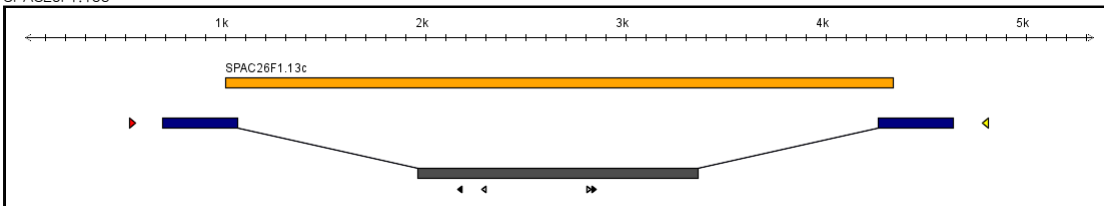

SPAC26F1.14c

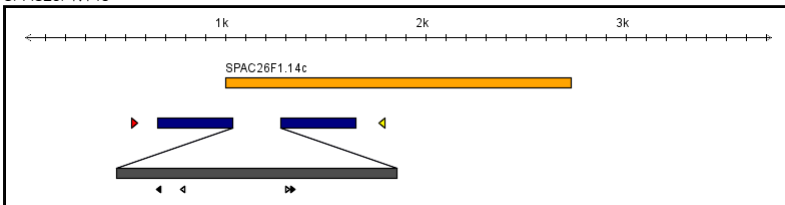

SPAC26H5.02c

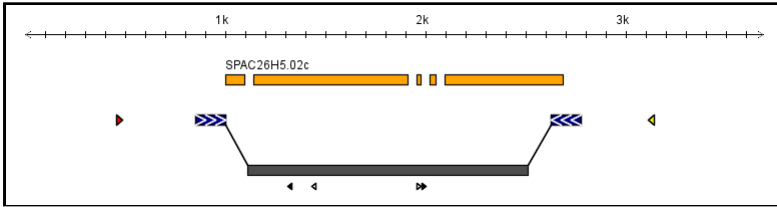

SPAC26H5.03

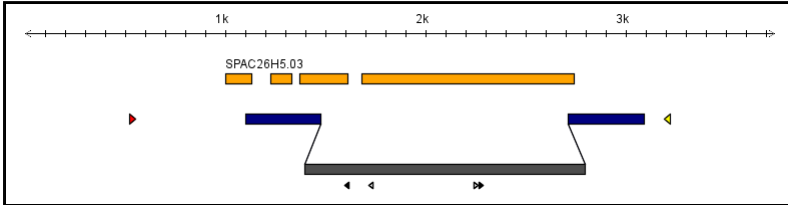

SPAC26H5.04

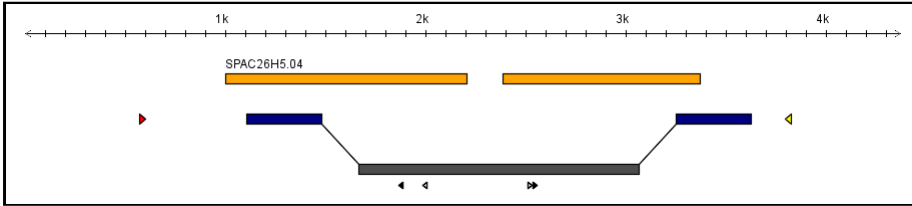

SPAC26H5.06

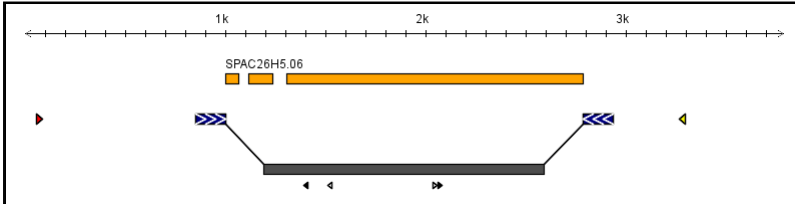

SPAC26H5.07c

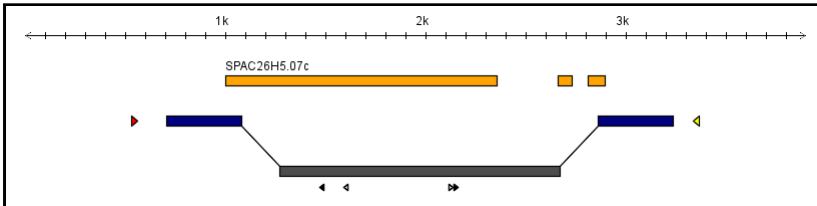

SPAC26H5.08c

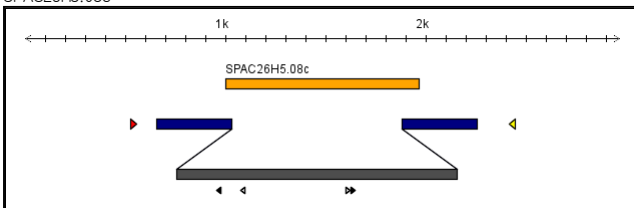

SPAC26H5.09c

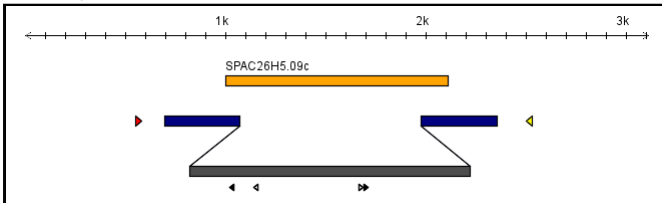

SPAC26H5.10c

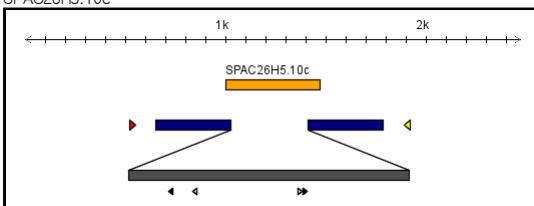

SPAC26H5.11

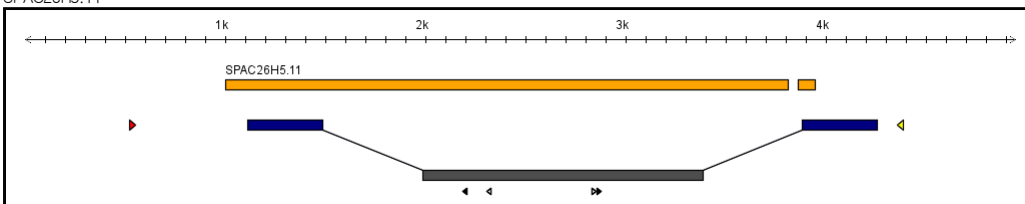

SPAC26H5.13c

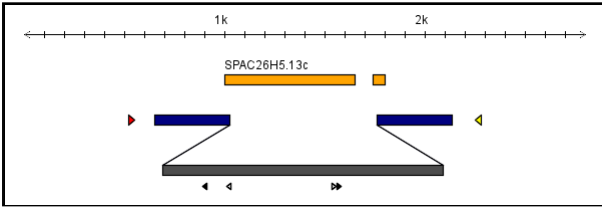

SPAC27D7.02c

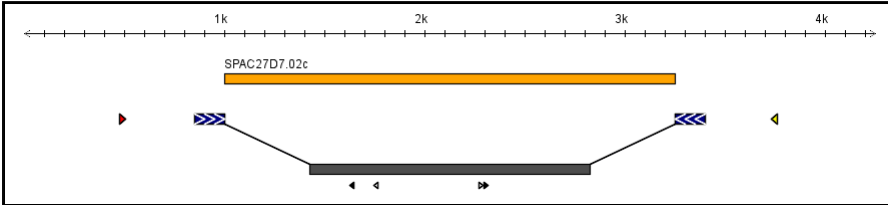

SPAC27D7.03c

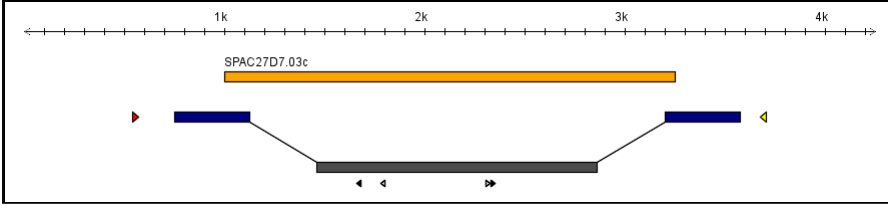

SPAC27D7.04

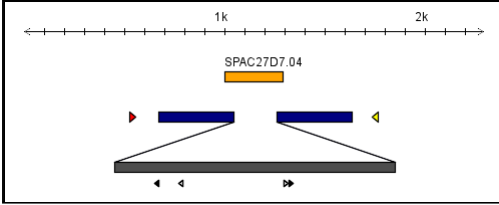

SPAC27D7.05c

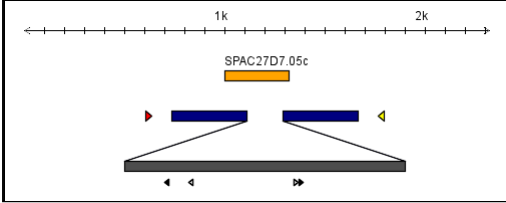

SPAC27D7.06

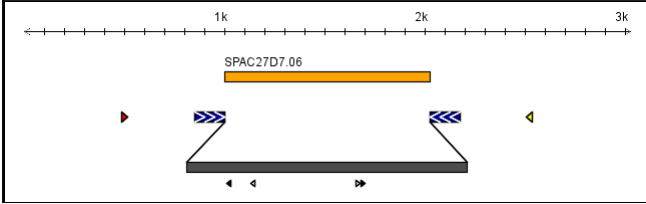

SPAC27D7.07c

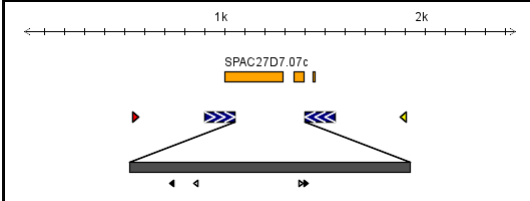

SPAC27D7.08c

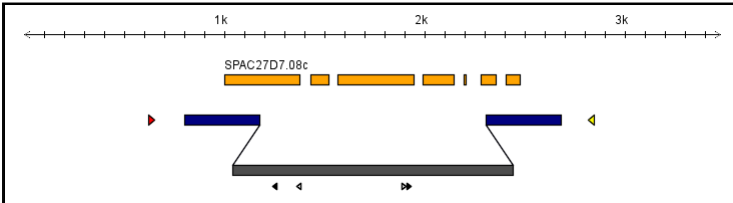

SPAC27D7.09c

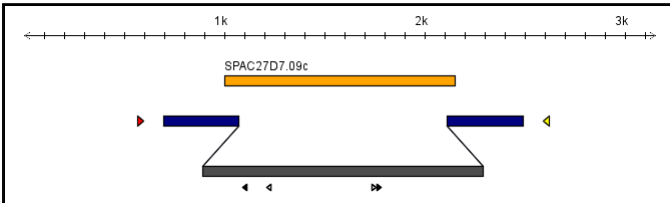

SPAC27D7.10c

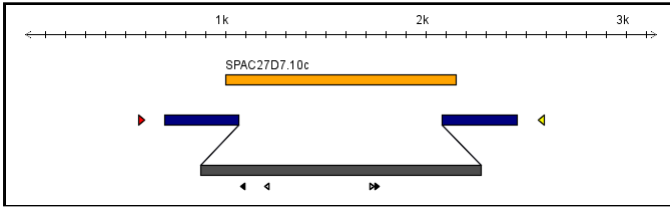

SPAC27D7.11c

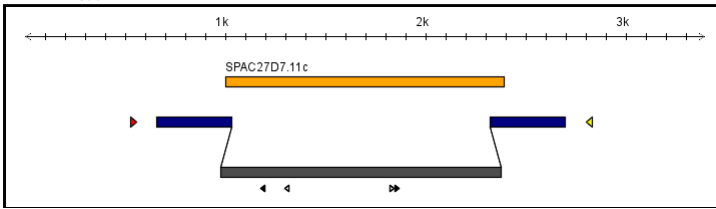

SPAC27D7.12c

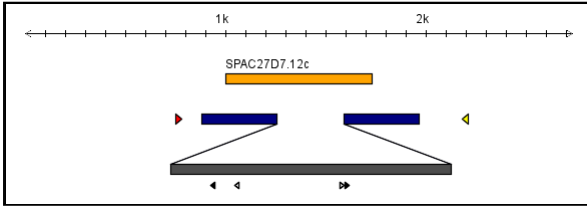

SPAC27D7.13c

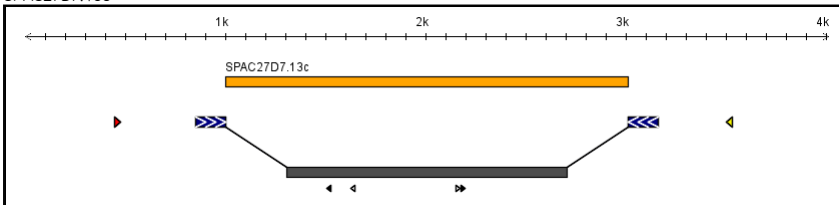

SPAC27E2.01

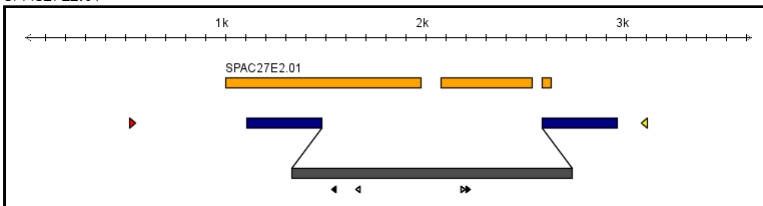

SPAC27E2.02

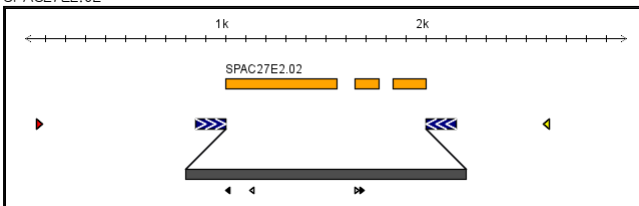

SPAC27E2.03c

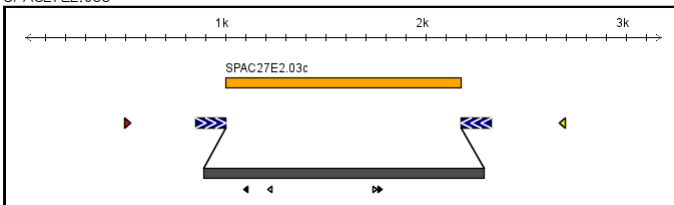

SPAC27E2.05

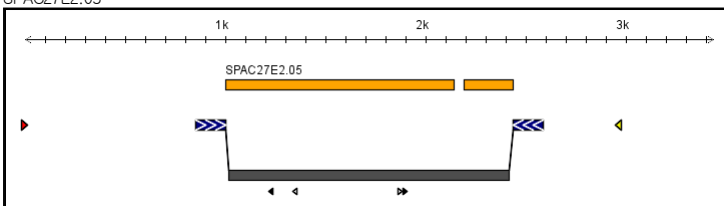

SPAC27E2.06c

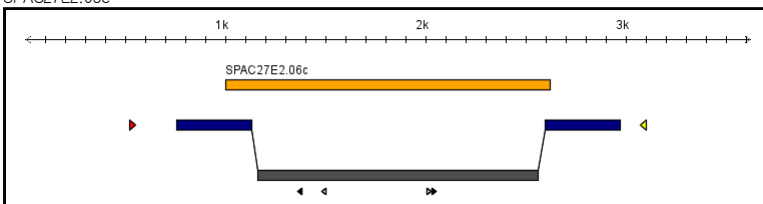

SPAC27E2.07

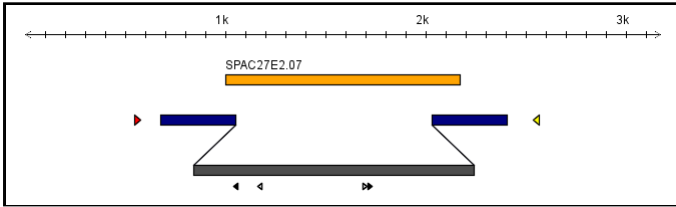

SPAC27E2.10c

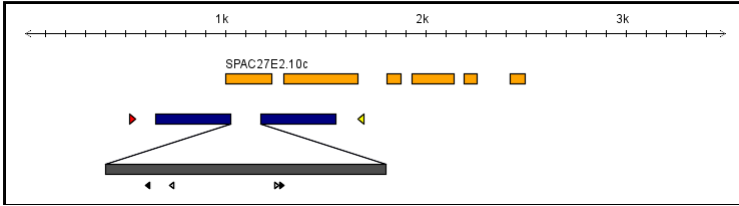

SPAC27E2.11c

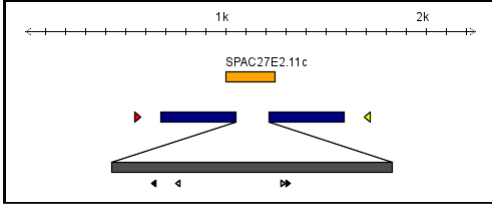

SPAC27F1.02c

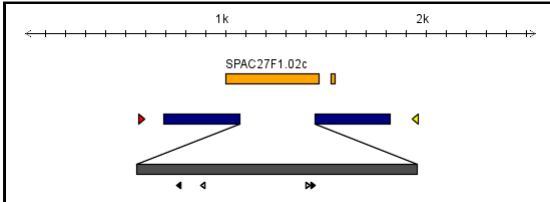

SPAC27F1.03c

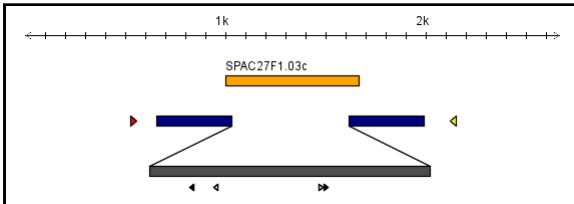

SPAC27F1.04c

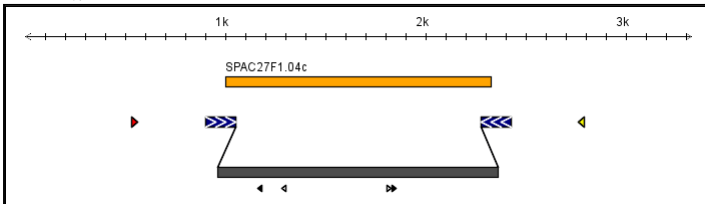

SPAC27F1.05c

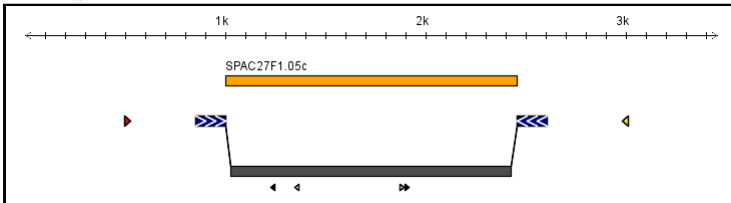

SPAC27F1.06c

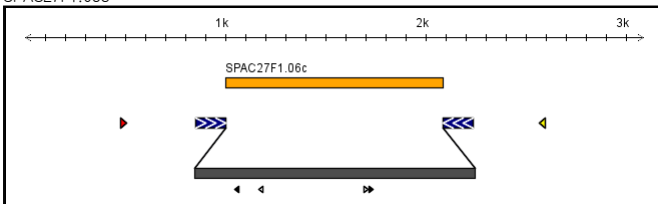

SPAC27F1.07

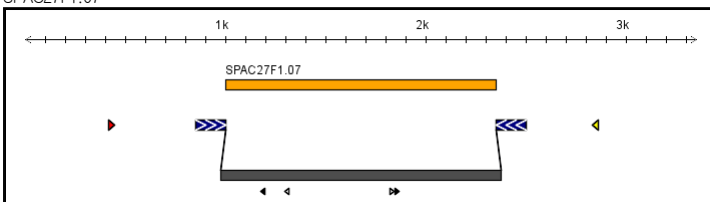

SPAC27F1.08

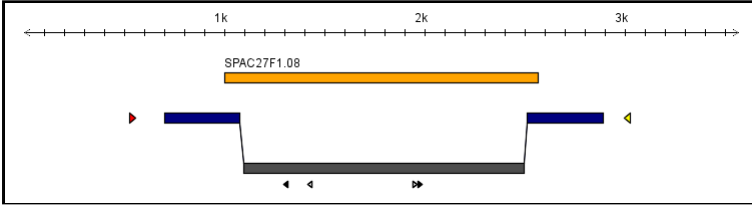

SPAC27F1.09c

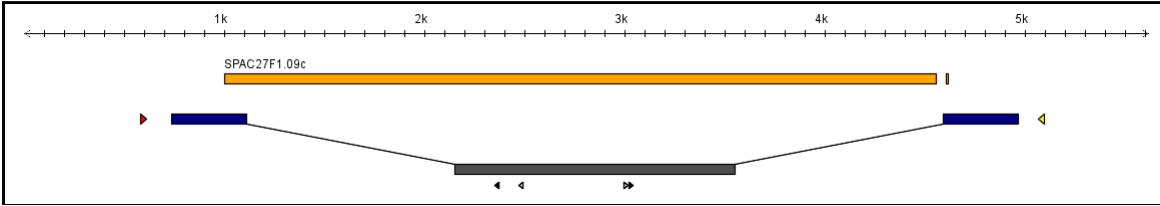

SPAC27F1.10

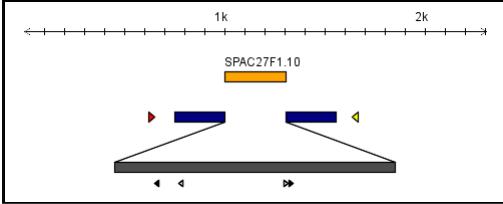

SPAC29A4.02c

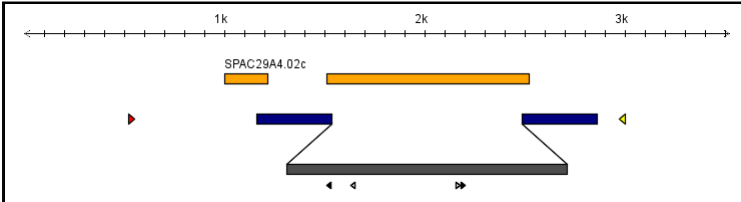

SPAC29A4.03c

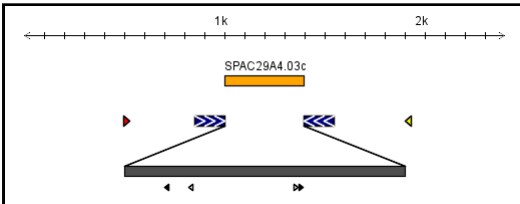

SPAC29A4.04c

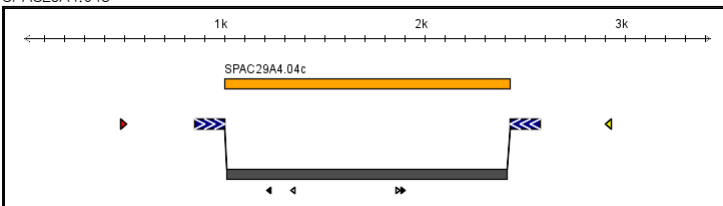

SPAC29A4.05

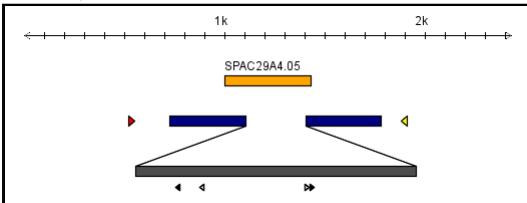

SPAC29A4.06c

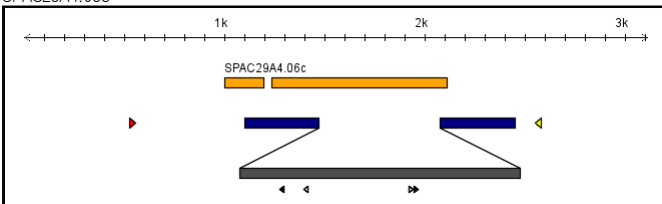

SPAC29A4.07

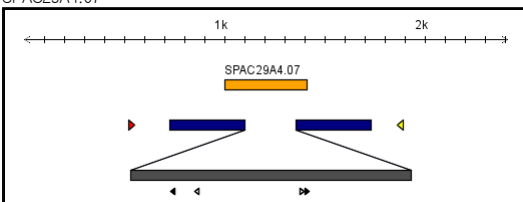

SPAC29A4.08c

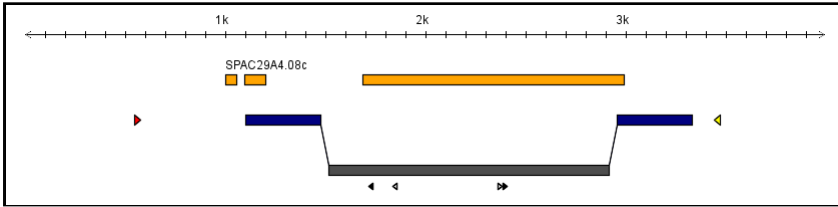

SPAC29A4.09

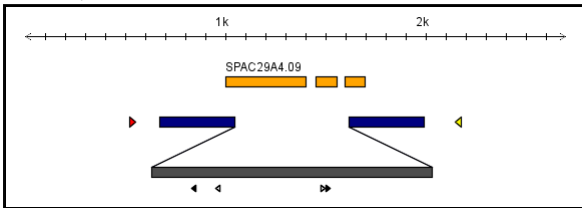

SPAC29A4.10

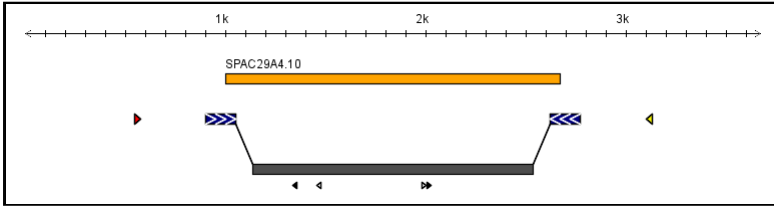

SPAC29A4.12c

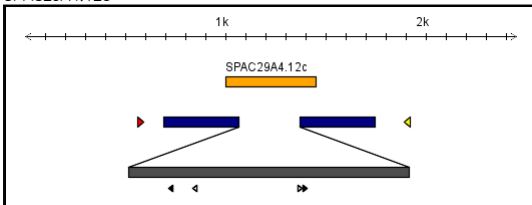

SPAC29A4.13

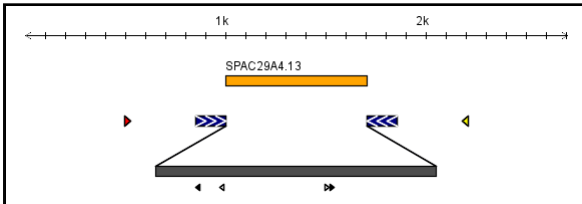

SPAC29A4.14c

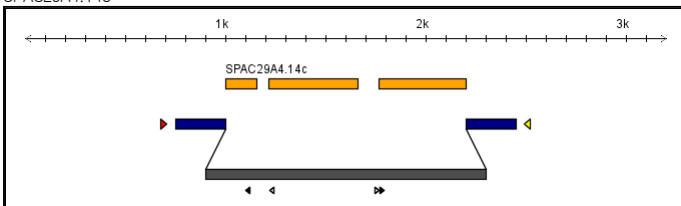

SPAC29A4.15

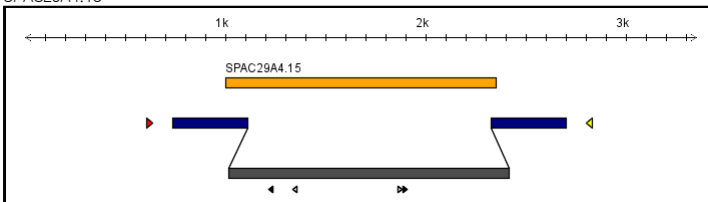

SPAC29A4.16

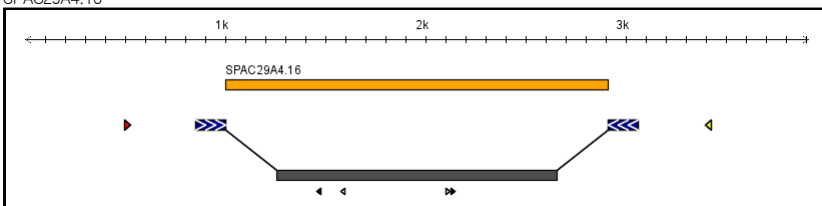

SPAC29A4.17c

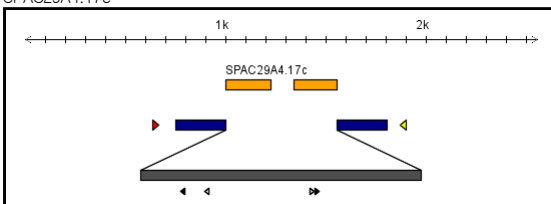

SPAC29A4.18

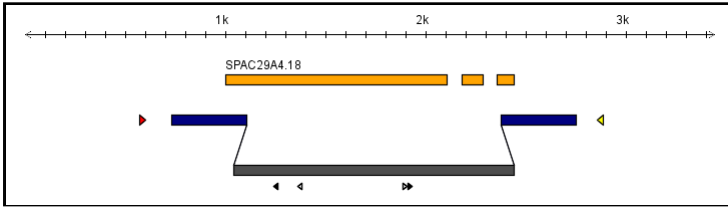

SPAC29A4.20

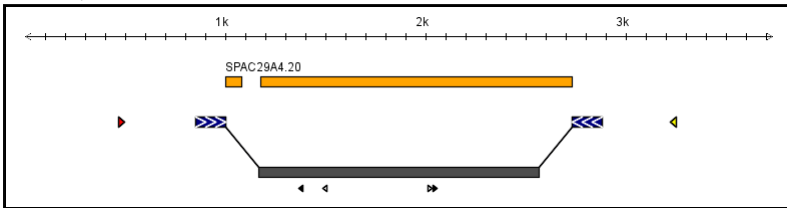

SPAC29B12.02c

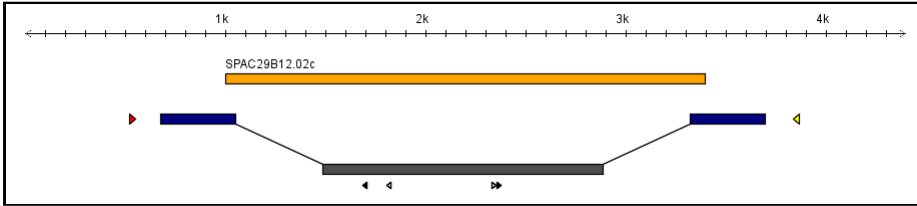

SPAC29B12.03

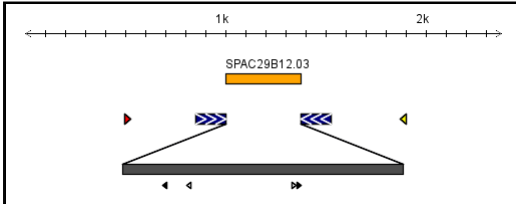

SPAC29B12.04

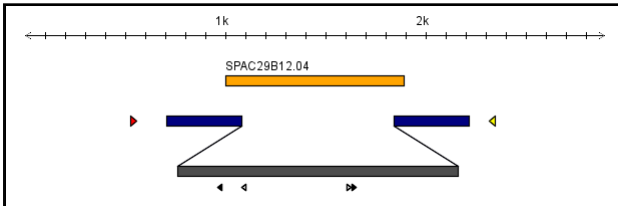

SPAC29B12.05c

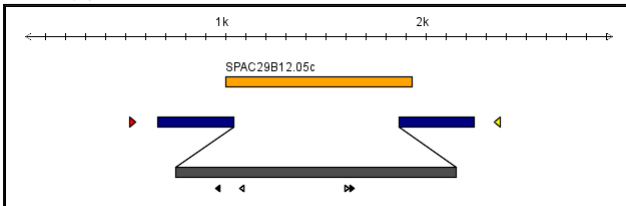

SPAC29B12.06c

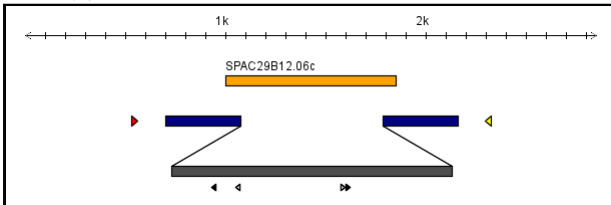

SPAC29B12.08

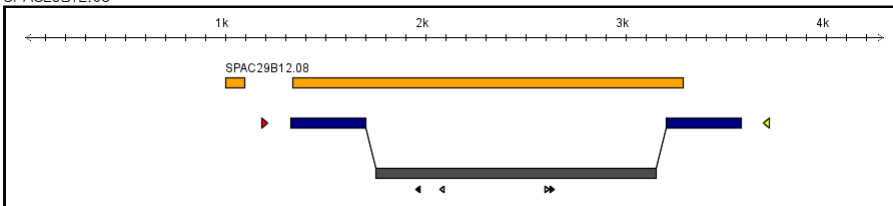

SPAC29B12.10c

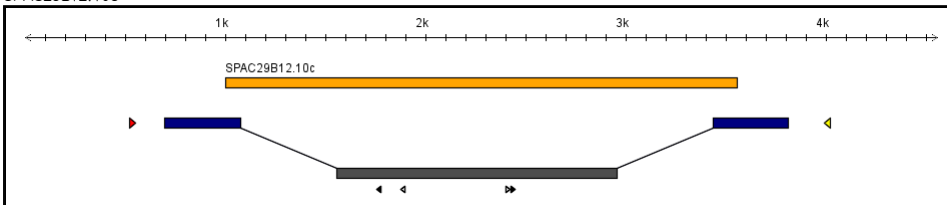



SPAC29B12.11c

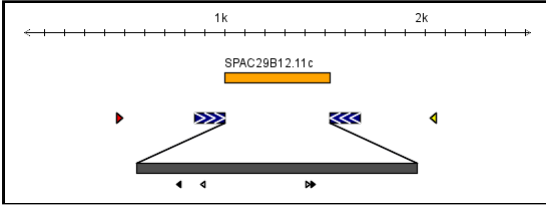

SPAC29B12.12

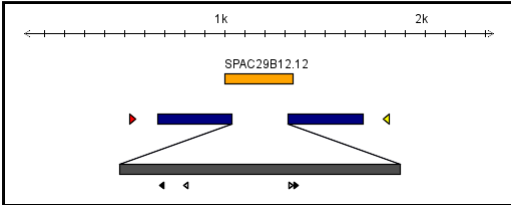

SPAC29B12.13

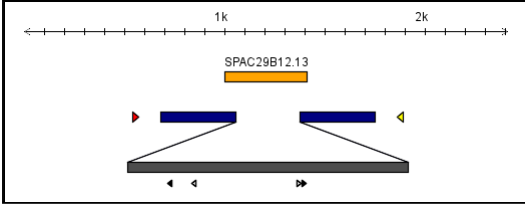

SPAC29B12.14c

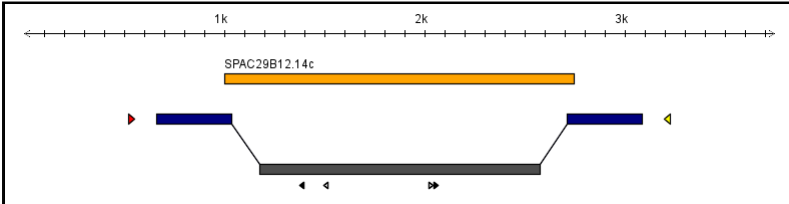

SPAC29E6.01

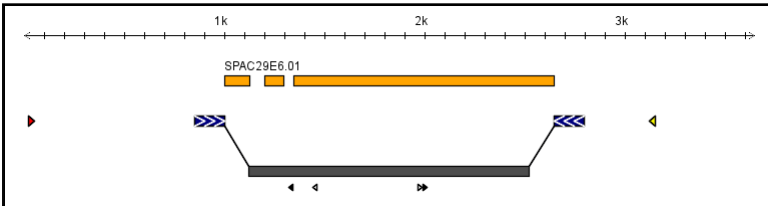

SPAC29E6.02

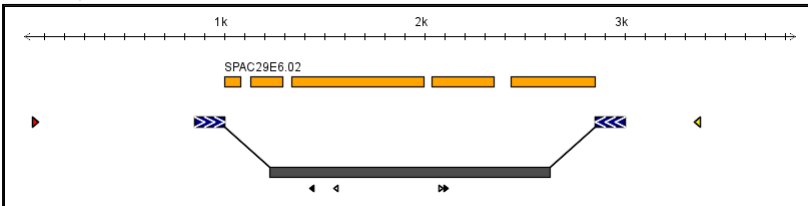

SPAC29E6.04

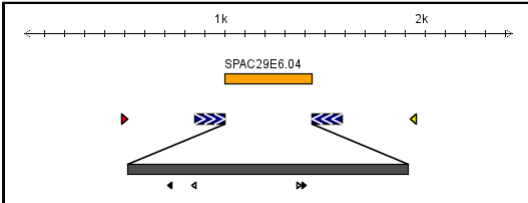

SPAC29E6.05c

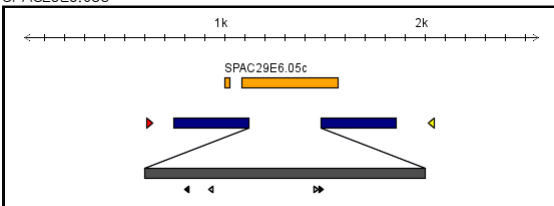

SPAC29E6.06c

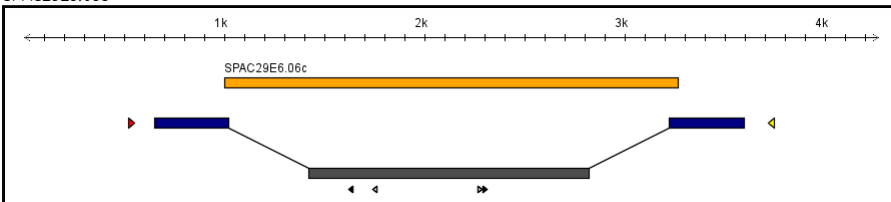

SPAC29E6.07

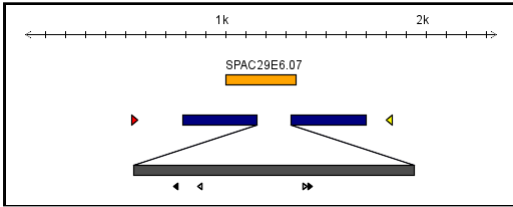

SPAC29E6.08

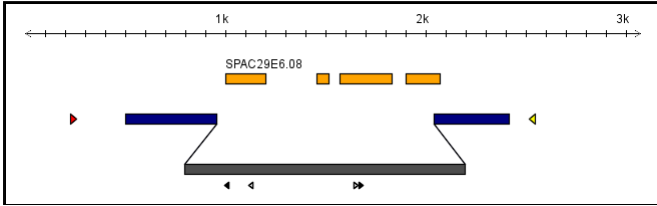

SPAC29E6.09

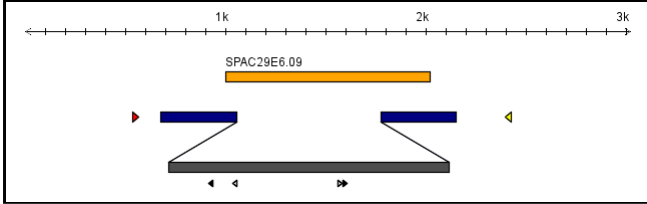

SPAC30.02c

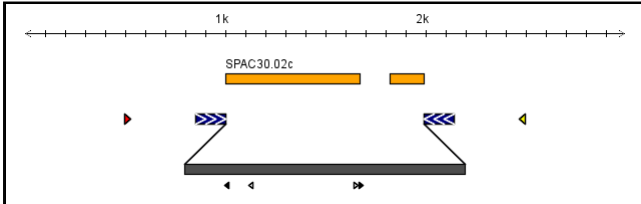

SPAC30.03c

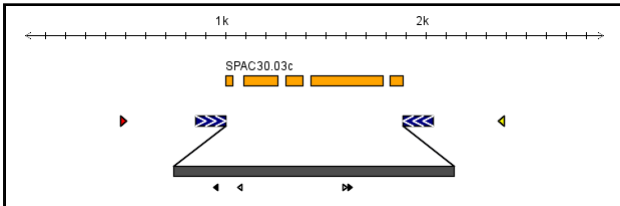

SPAC30C2.02

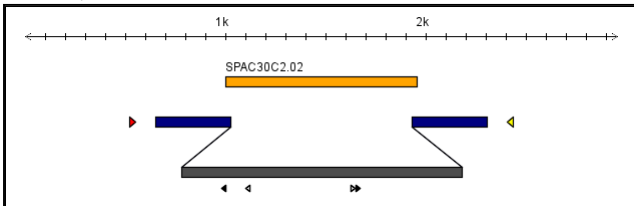

SPAC30C2.03

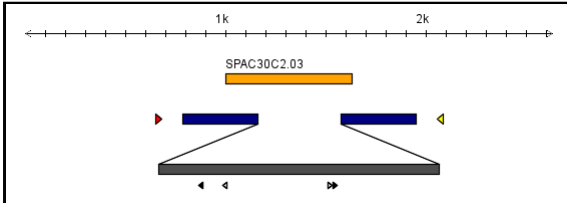

SPAC30C2.04

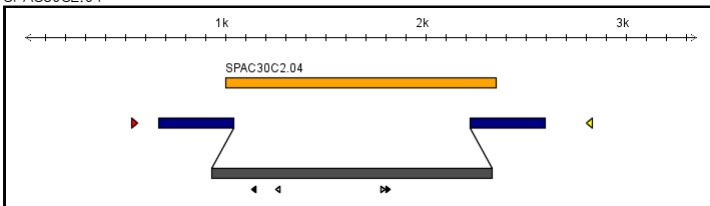

SPAC30C2.05

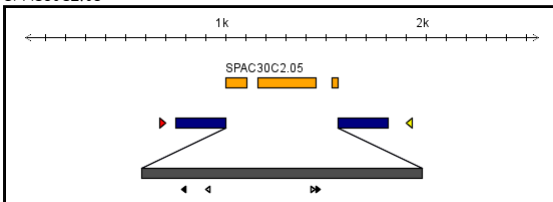

SPAC30C2.06c

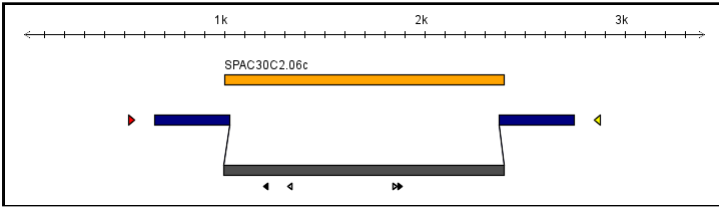

SPAC30C2.07

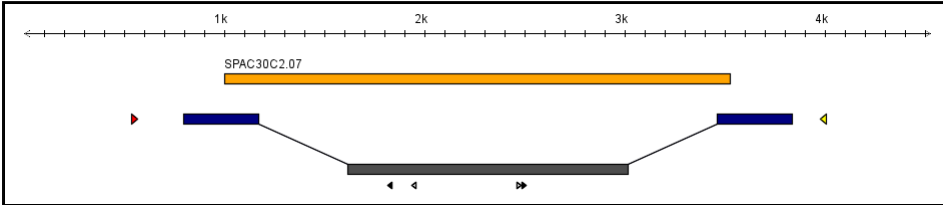

SPAC30C2.08

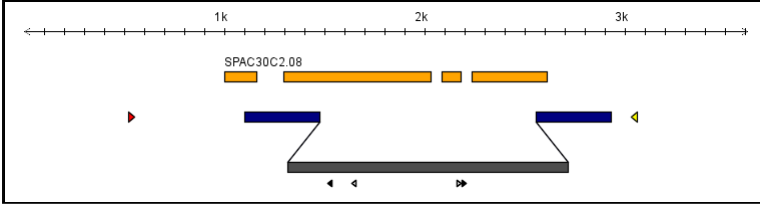

SPAC30D11.01c

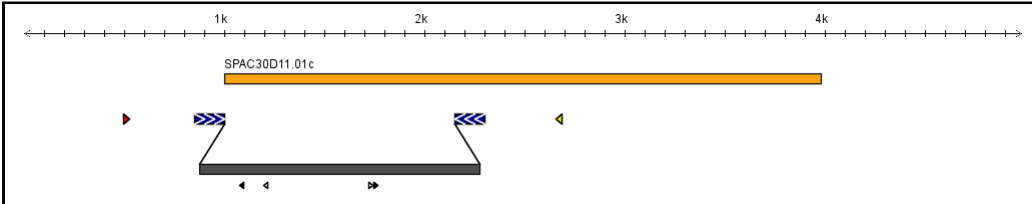

SPAC30D11.02c

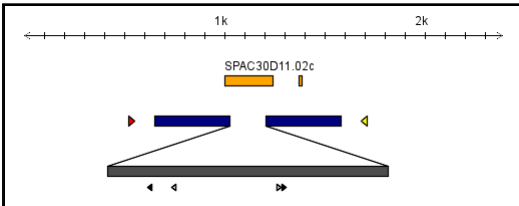

SPAC30D11.04c

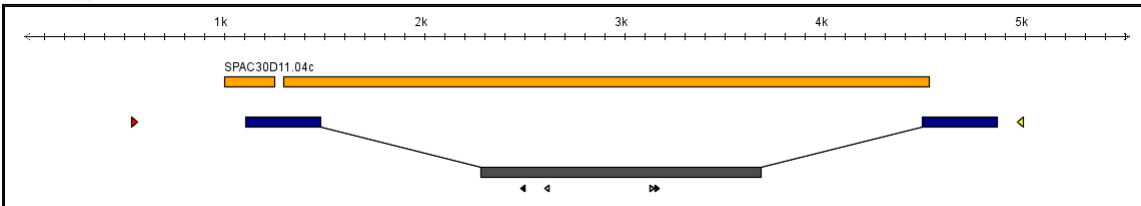

SPAC30D11.05

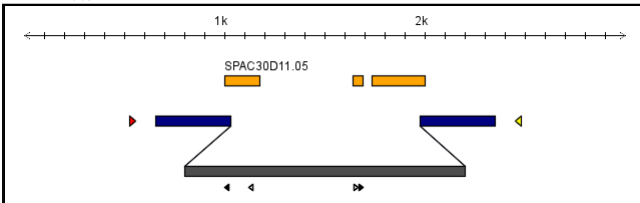

SPAC30D11.06c

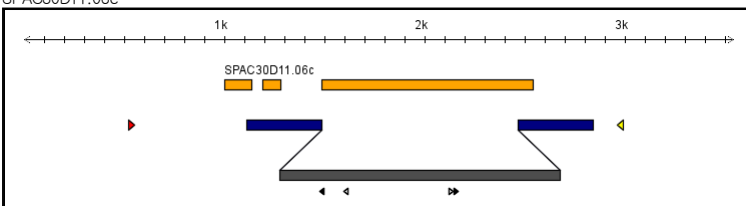

SPAC30D11.07

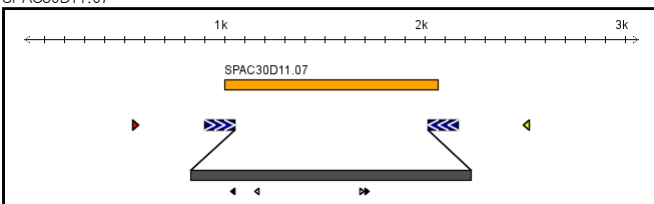

SPAC30D11.08c

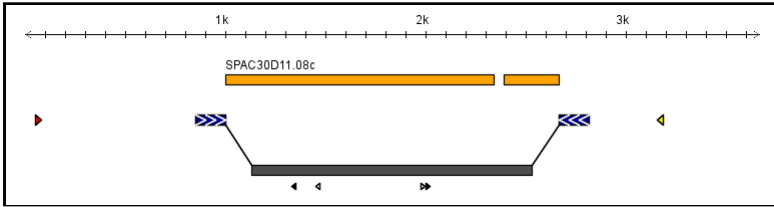

SPAC30D11.09

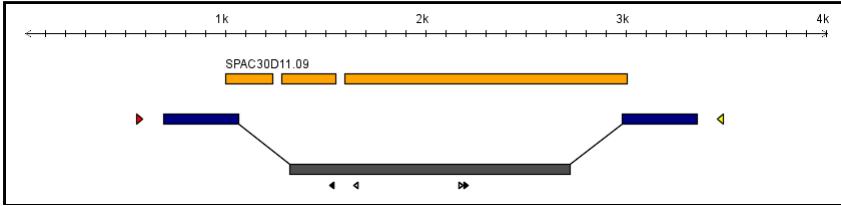

SPAC30D11.10

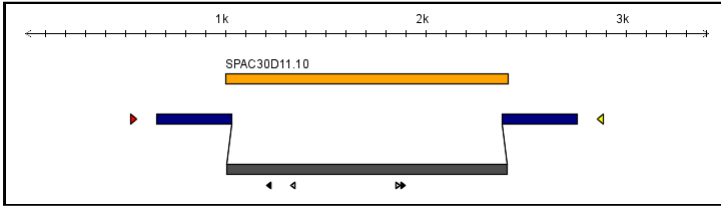

SPAC30D11.11

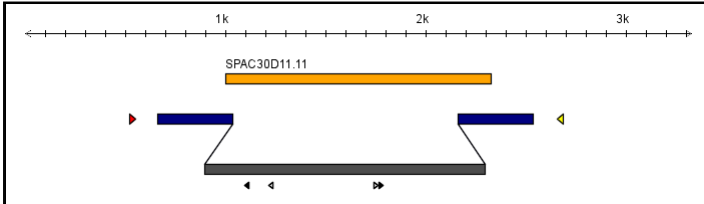

SPAC30D11.12

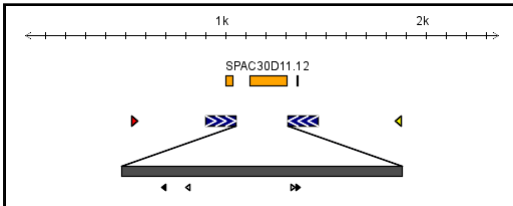

SPAC30D11.13

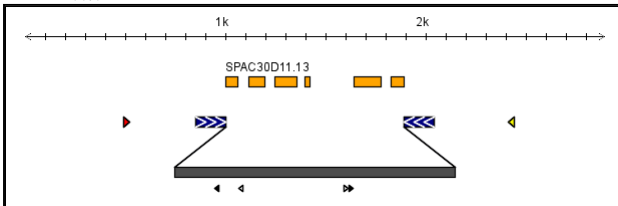

SPAC30D11.14c

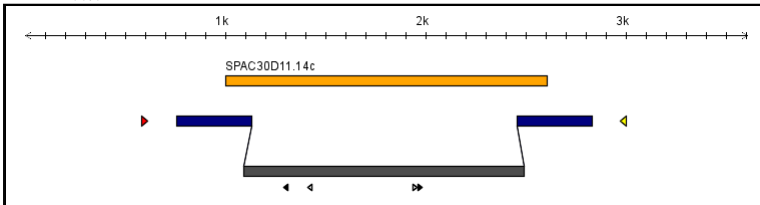

SPAC31A2.02

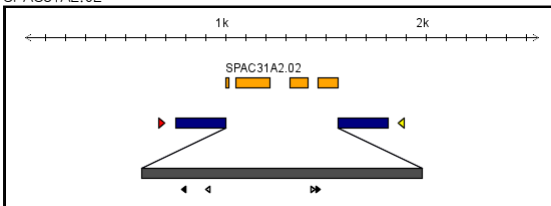

SPAC31A2.03

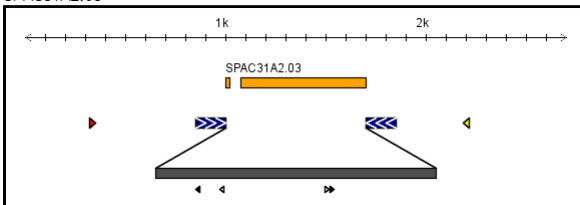

SPAC31A2.04c

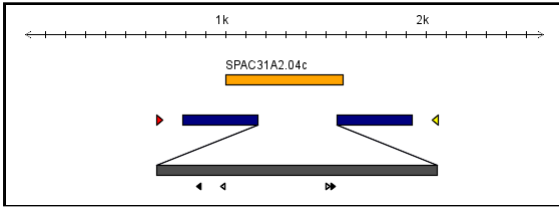

SPAC31A2.06

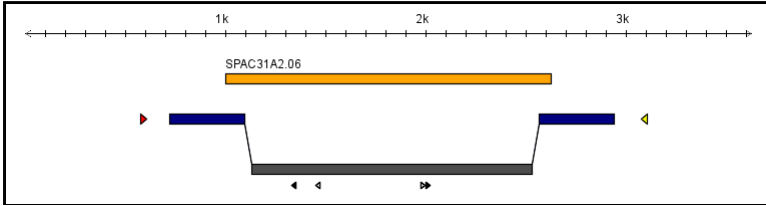

SPAC31A2.08

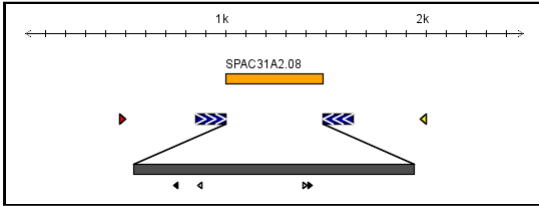

SPAC31A2.09c

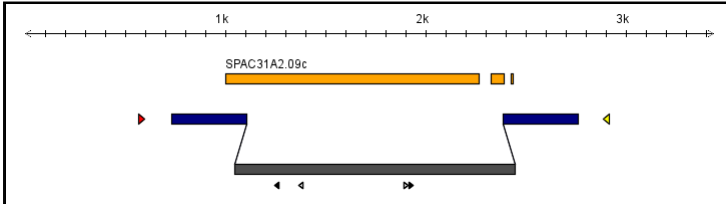

SPAC31A2.10

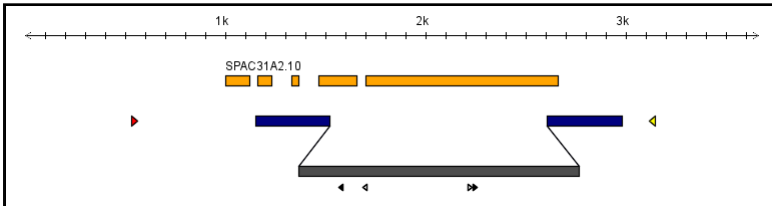

SPAC31A2.11c

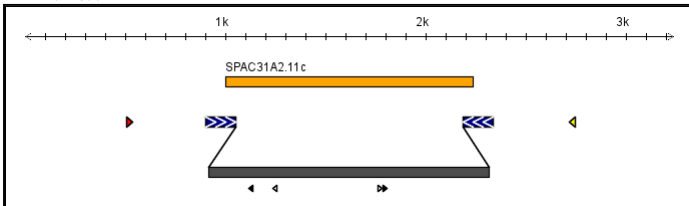

SPAC31A2.12

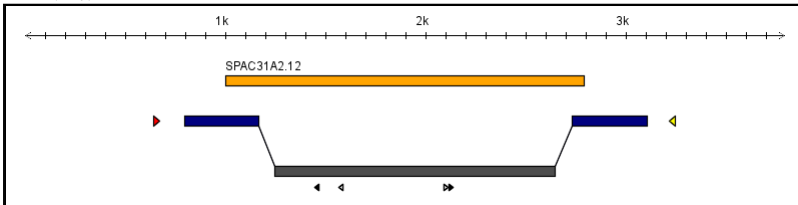

SPAC31A2.13c

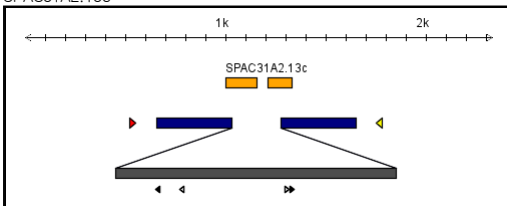

SPAC31A2.14

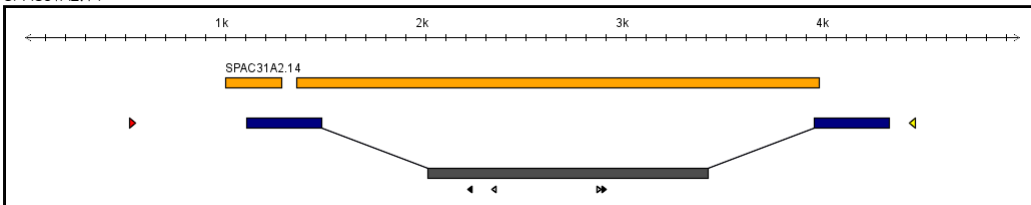

SPAC31A2.15c

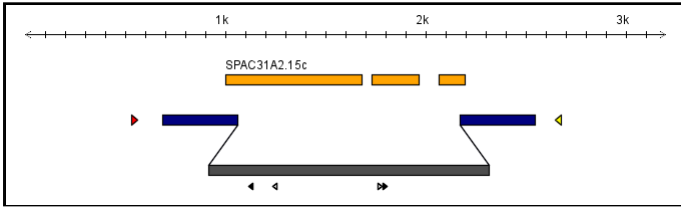

SPAC31F12.01

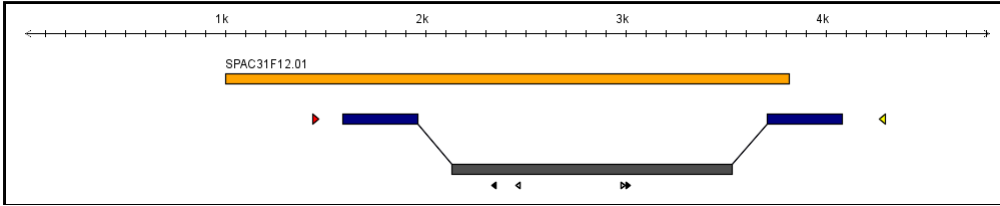

SPAC31G5.02

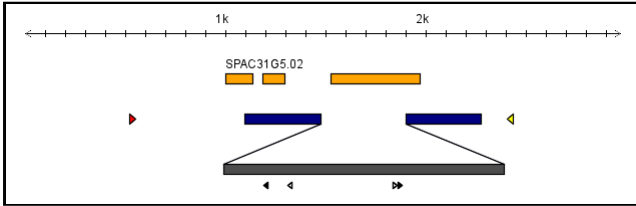

SPAC31G5.03

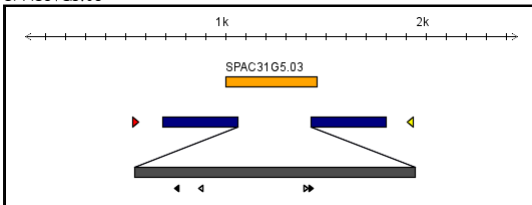

SPAC31G5.04

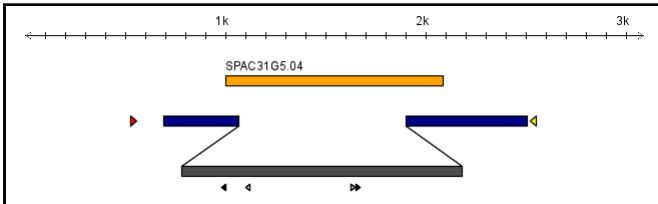

SPAC31G5.05c

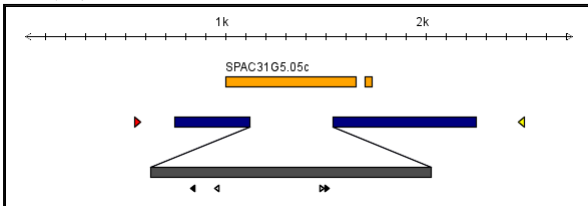

SPAC31G5.06

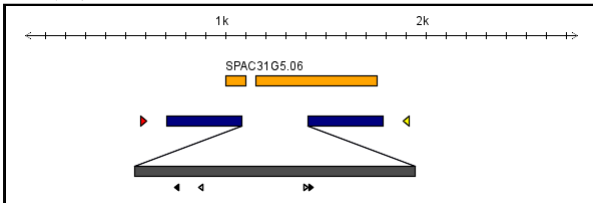

SPAC31G5.07

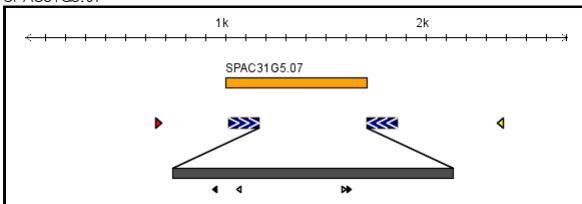

SPAC31G5.08

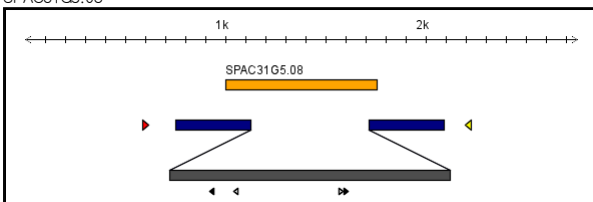

SPAC31G5.09c

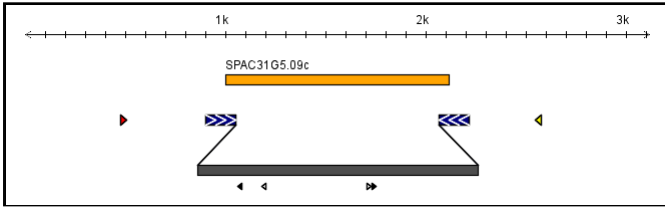

SPAC31G5.10

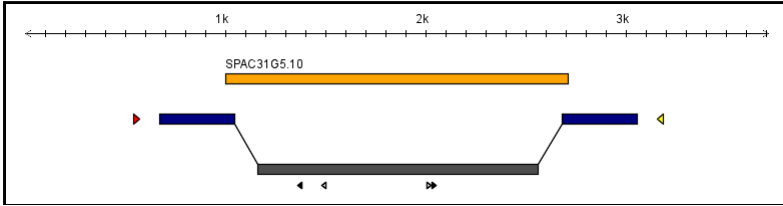

SPAC31G5.11

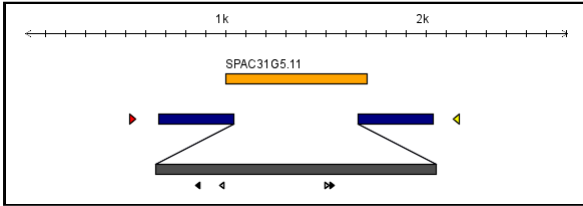

SPAC31G5.12c

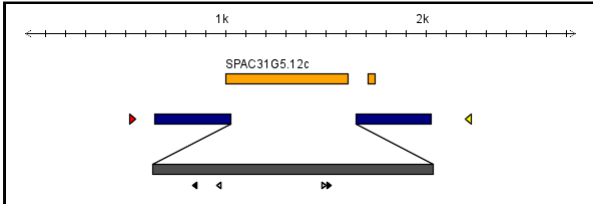

SPAC31G5.13

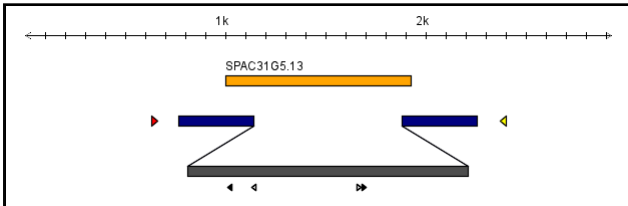

SPAC31G5.14

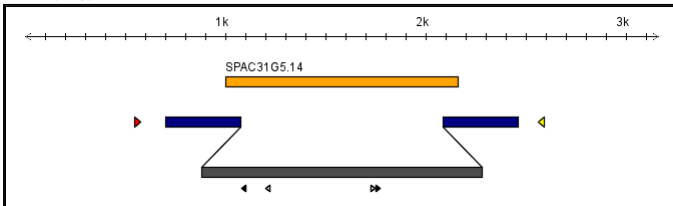

SPAC31G5.16c

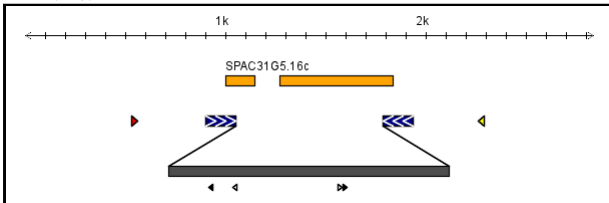

SPAC31G5.17c

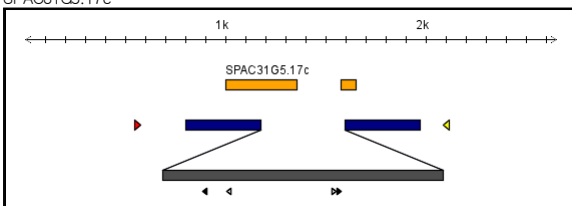

SPAC31G5.18c

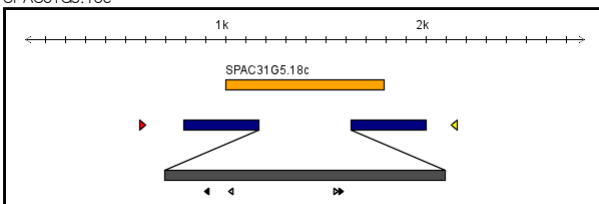

SPAC31G5.21

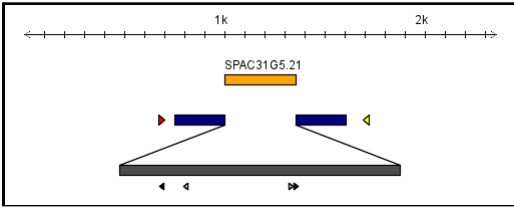

SPAC323.01c

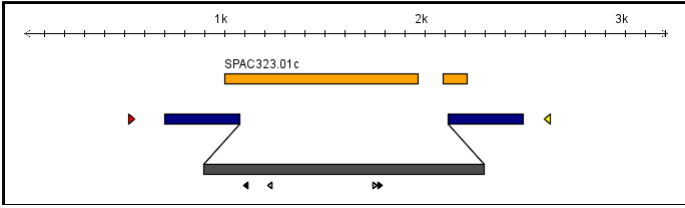

SPAC323.02c

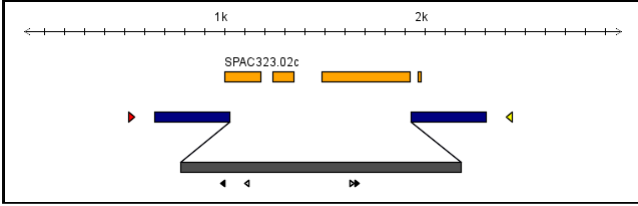

SPAC323.03c

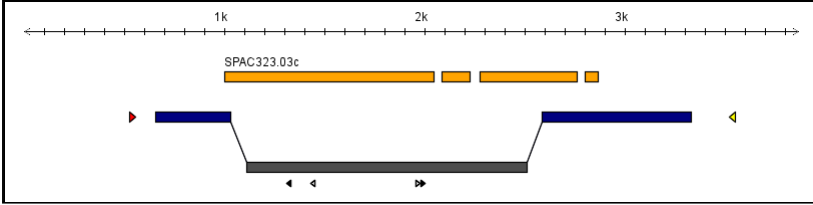

SPAC323.04

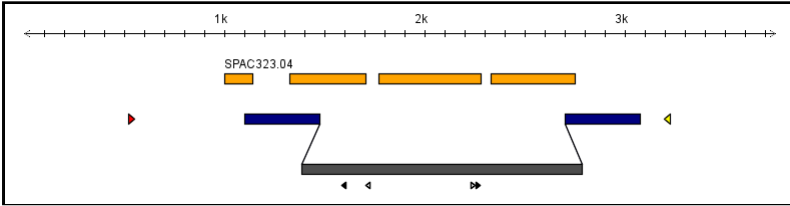

SPAC323.05c

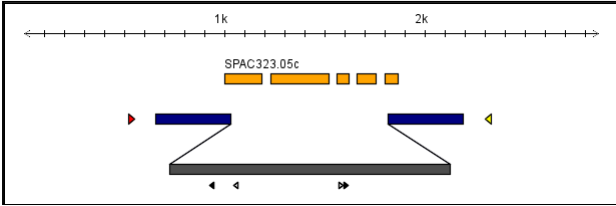

SPAC323.06c

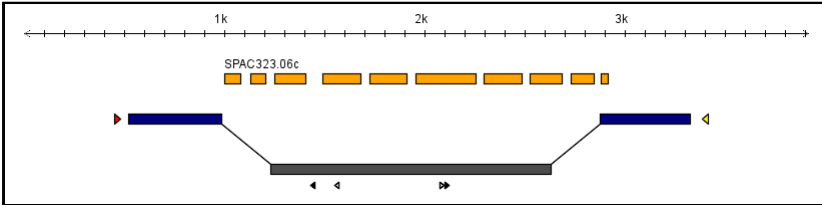

SPAC323.07c

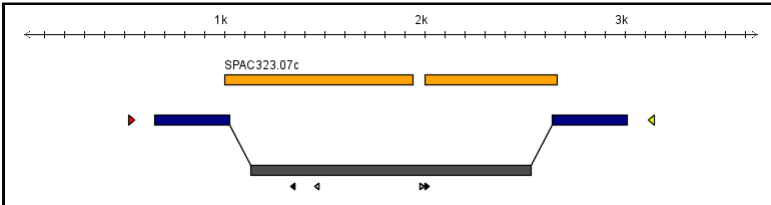

SPAC323.08

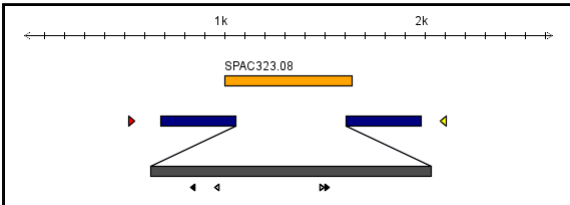



SPAC328.01c

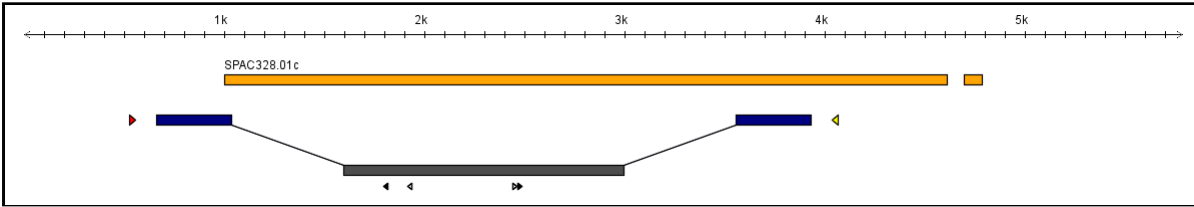

SPAC328.02

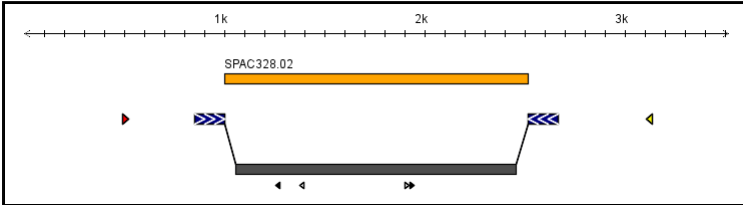

SPAC328.03

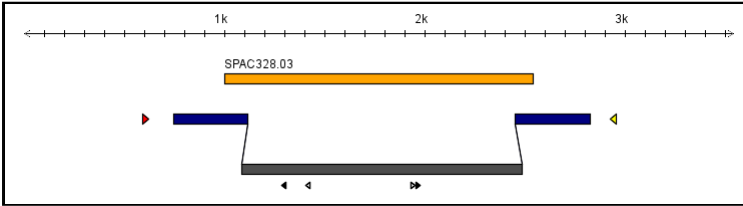

SPAC328.05

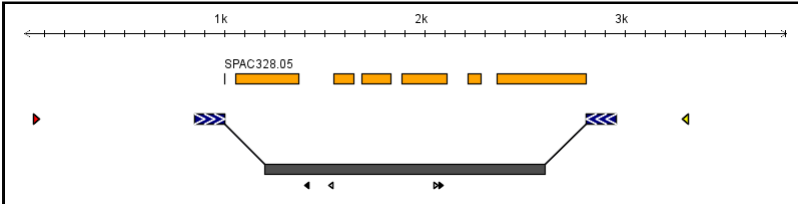

SPAC328.07c

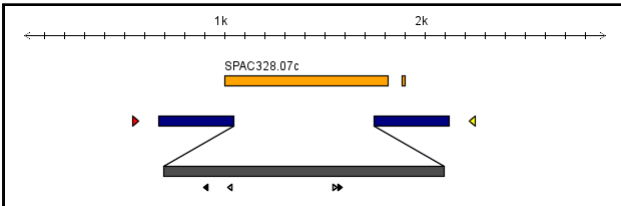

SPAC328.08c

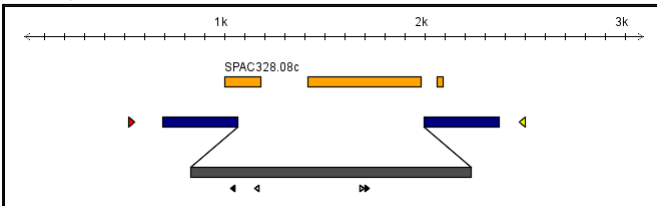

SPAC328.09

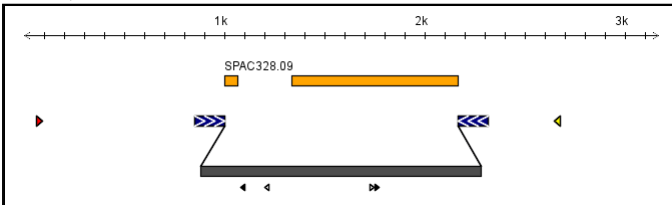

SPAC328.10c

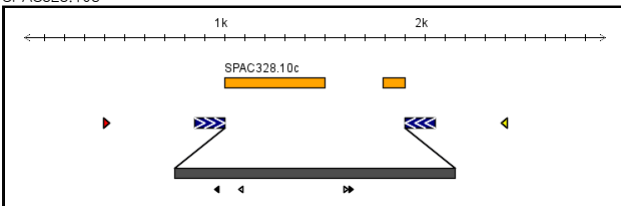

SPAC32A11.01

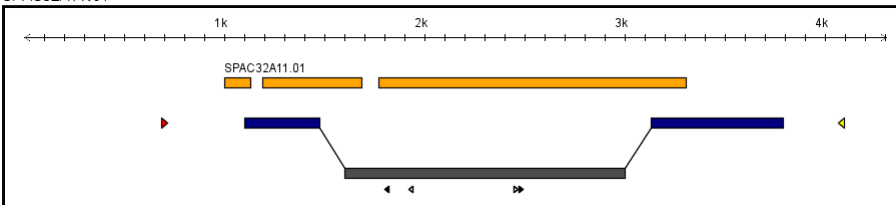

SPAC32A11.02c

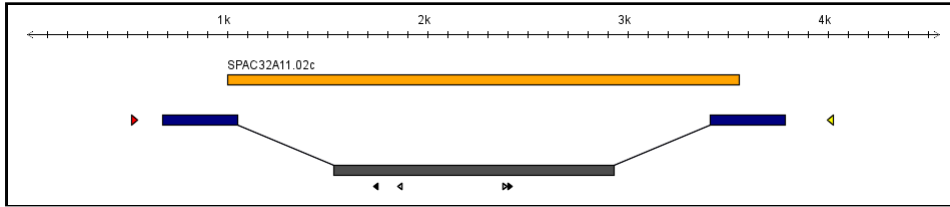

SPAC32A11.04c

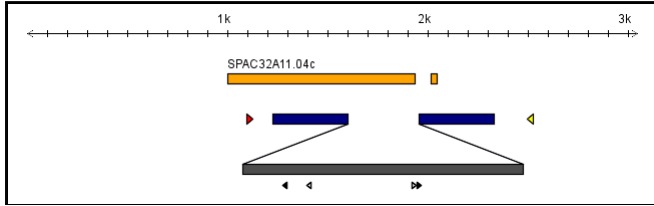

SPAC343.01c

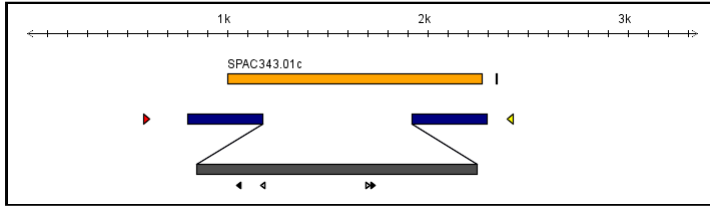

SPAC343.02

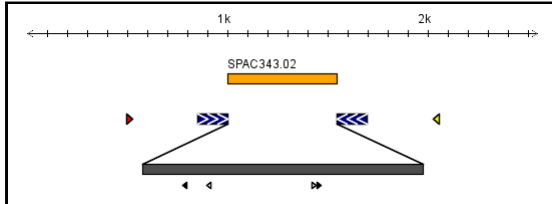

SPAC343.03

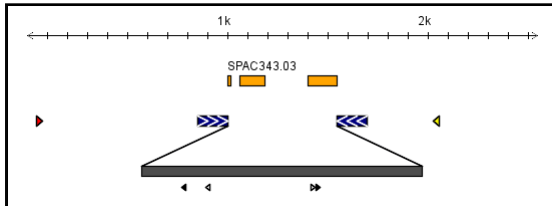

SPAC343.04c

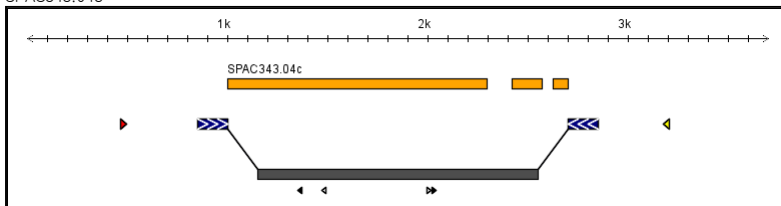

SPAC343.05

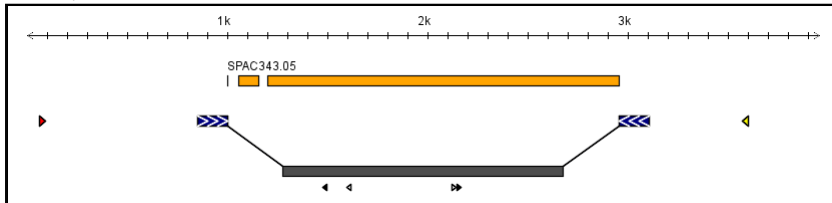

SPAC343.06c

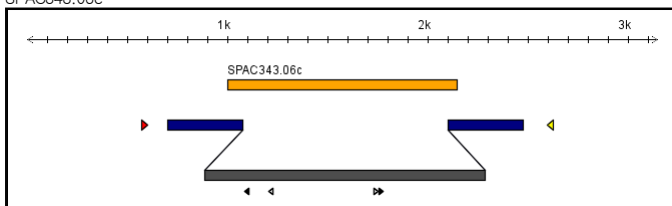

SPAC343.07

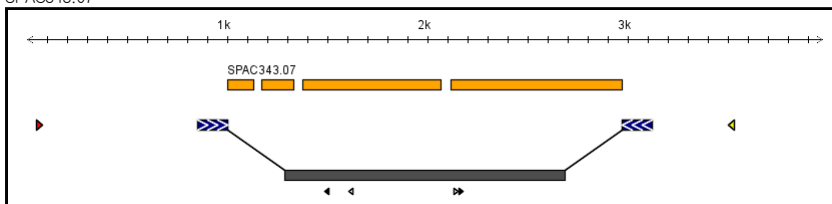

SPAC343.08c

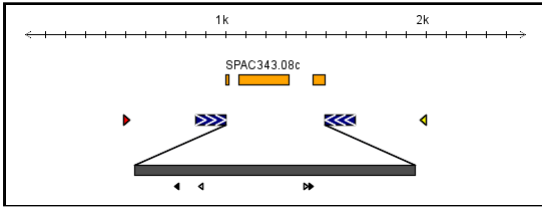

SPAC343.09

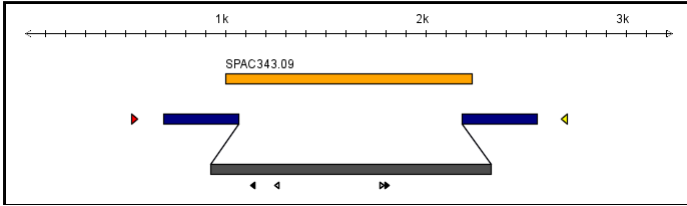

SPAC343.10

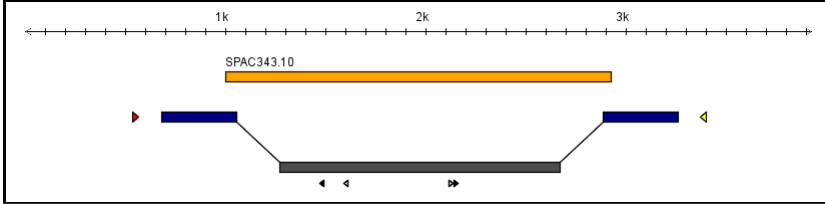

SPAC343.12

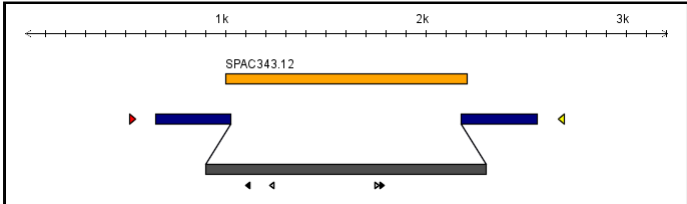

SPAC343.13

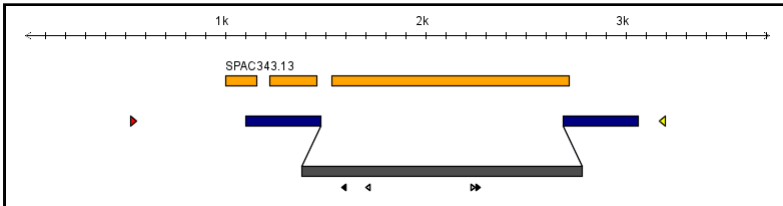

SPAC343.14c

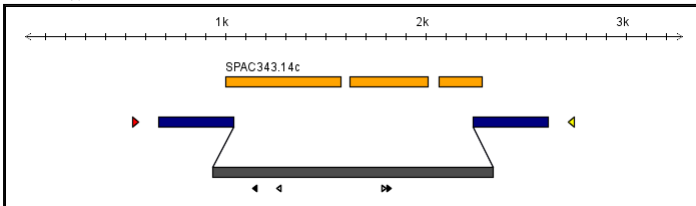

SPAC343.15

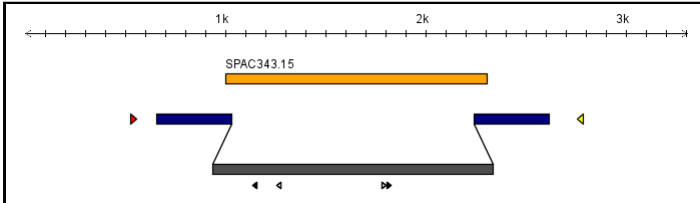

SPAC343.16

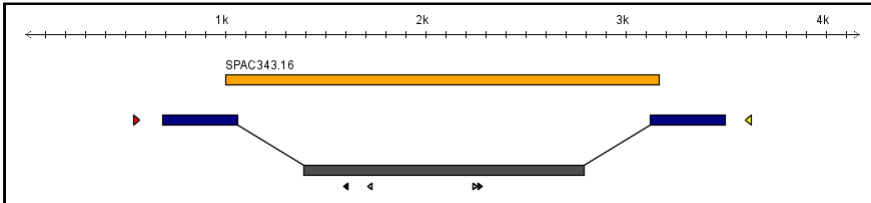

SPAC343.17c

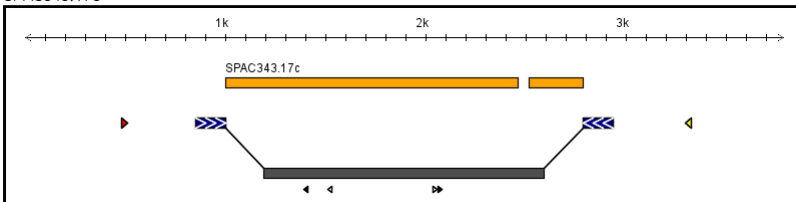

SPAC343.18

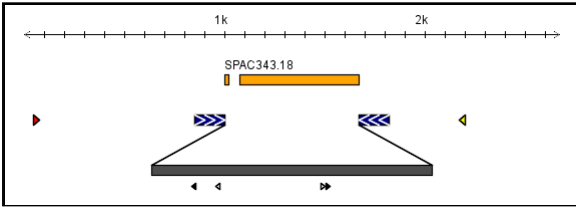

SPAC343.19

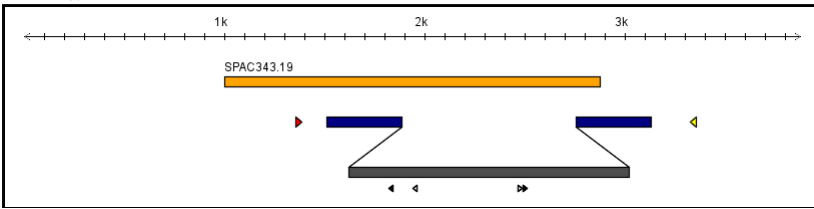

SPAC343.20

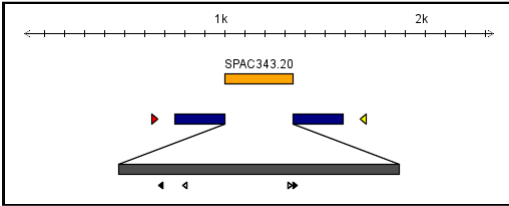

SPAC458.02c

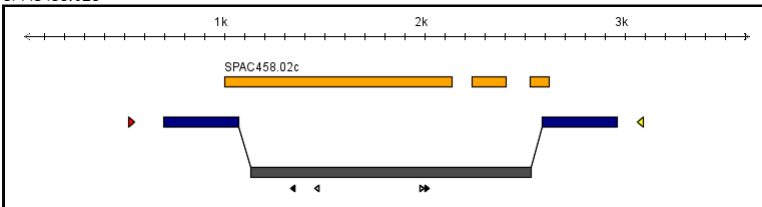

SPAC458.04c

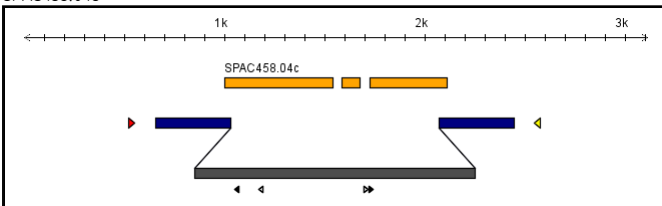

SPAC458.05

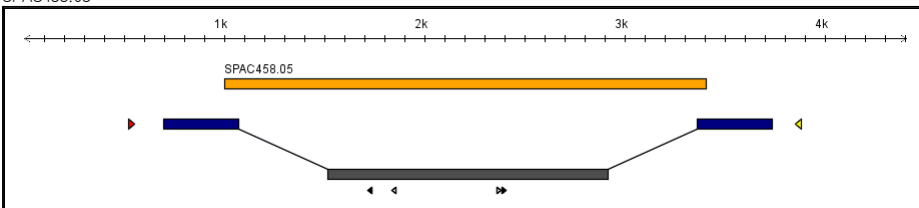

SPAC458.06

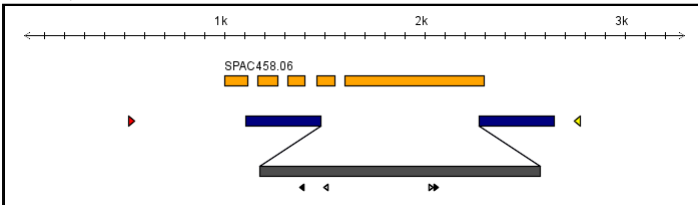

SPAC513.01c

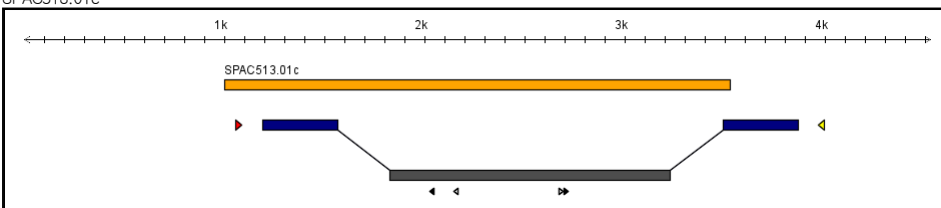

SPAC513.02

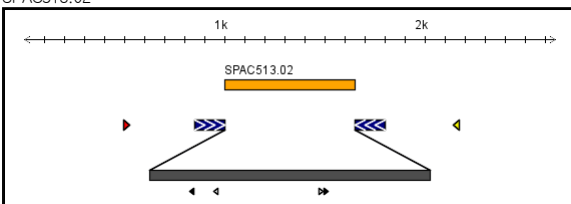

SPAC513.03

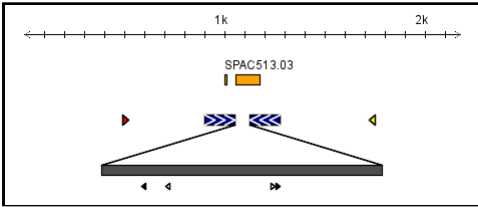

SPAC513.04

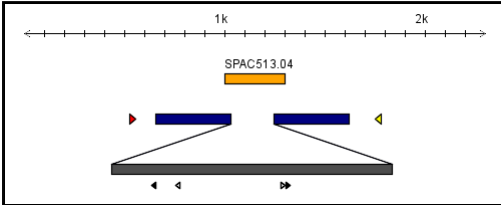

SPAC513.06c

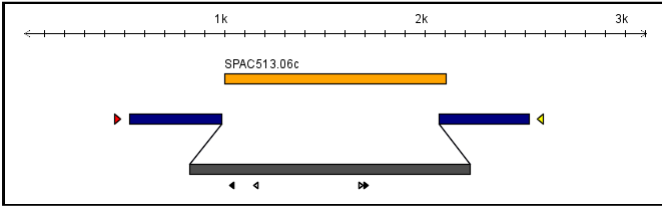

SPAC513.07

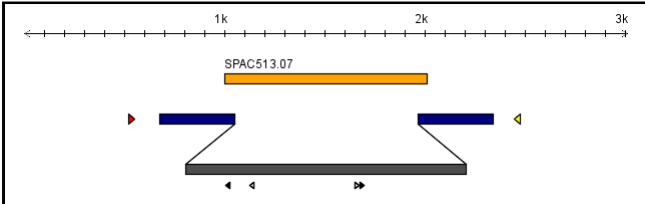

SPAC521.02

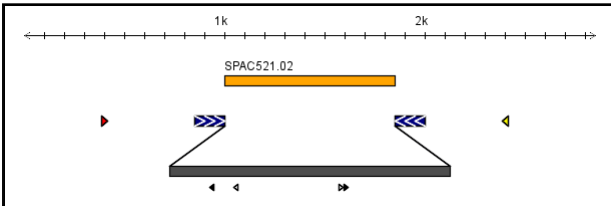

SPAC521.03

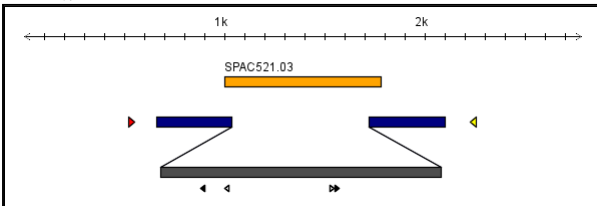

SPAC521.05

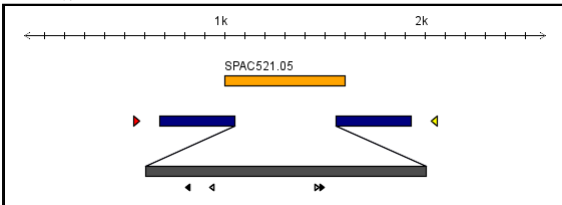

SPAC56E4.02c

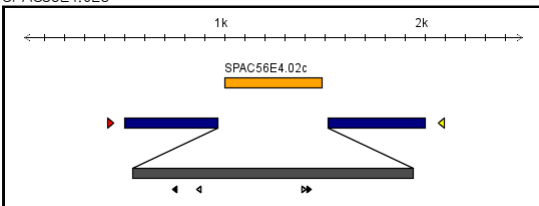

SPAC56E4.03

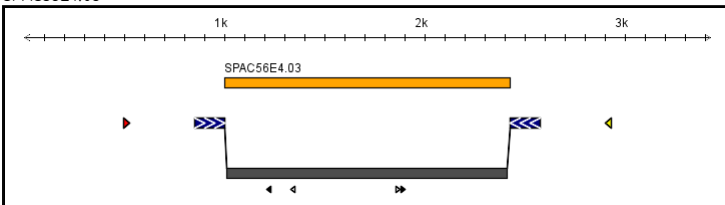

SPAC56E4.05

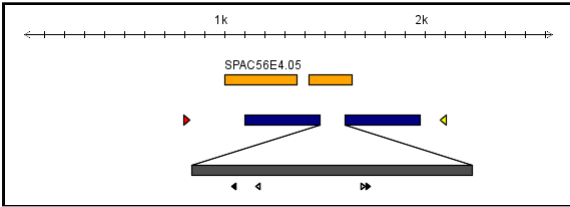

SPAC56E4.06c

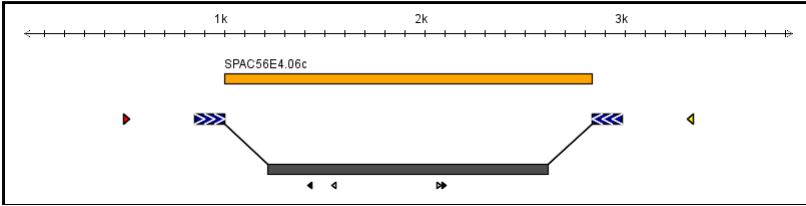

SPAC56E4.07

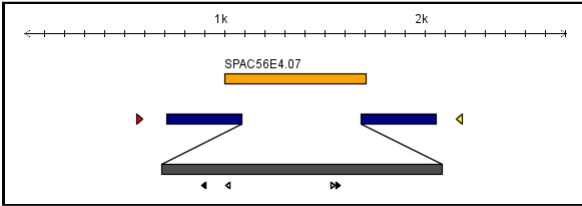

SPAC56F8.03

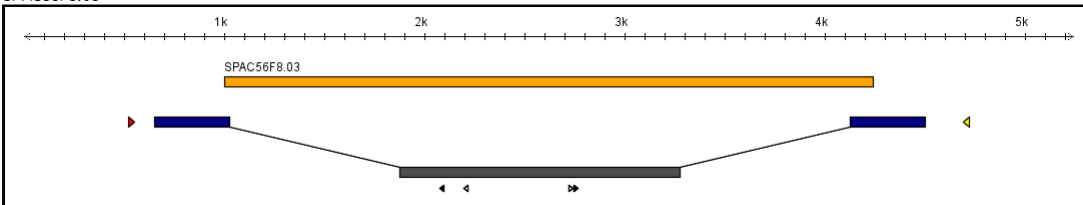

SPAC56F8.04c

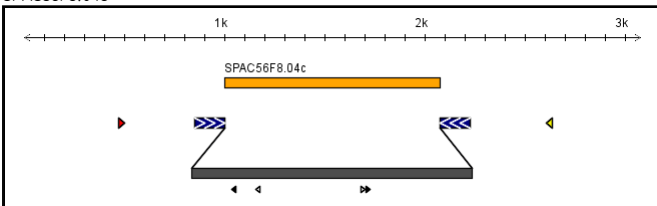

SPAC56F8.05c

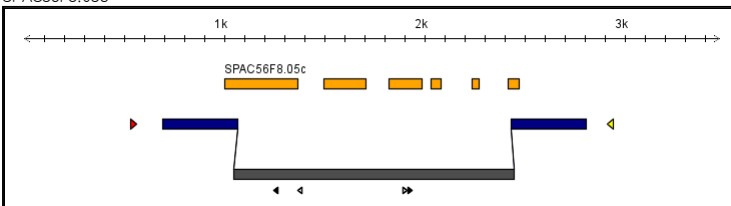

SPAC56F8.06c

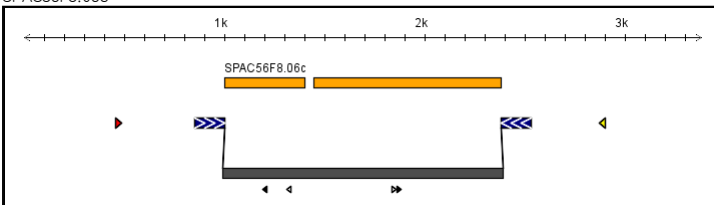

SPAC56F8.08

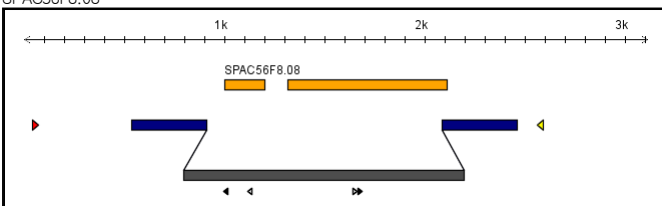

SPAC56F8.09

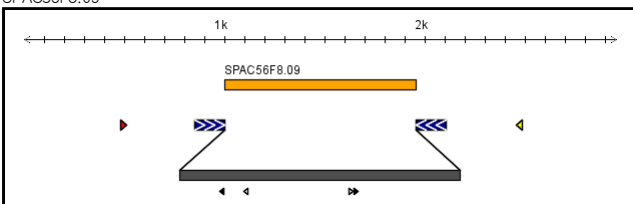

SPAC56F8.10

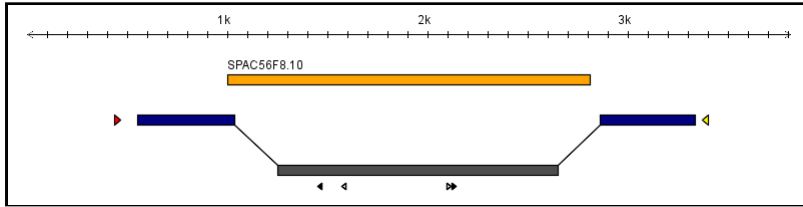

SPAC56F8.11

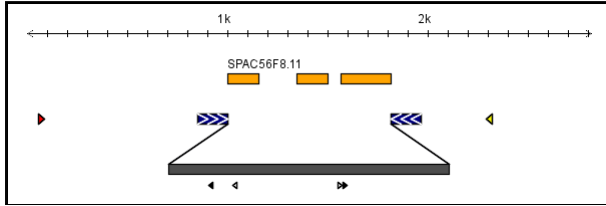

SPAC56F8.12

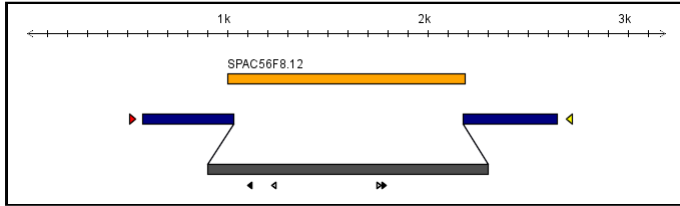

SPAC56F8.14c

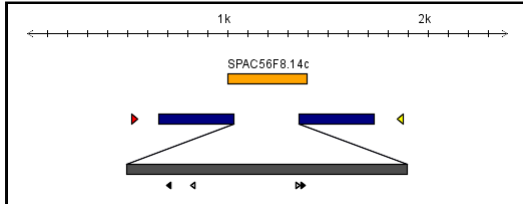

SPAC56F8.16

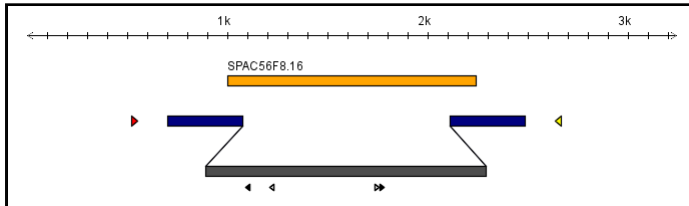

SPAC57A10.03

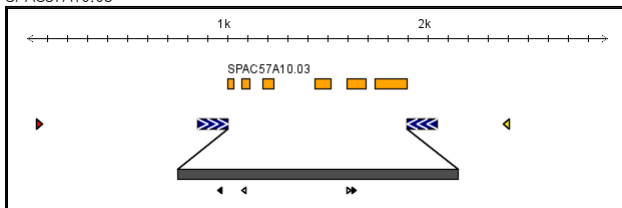

SPAC57A10.04

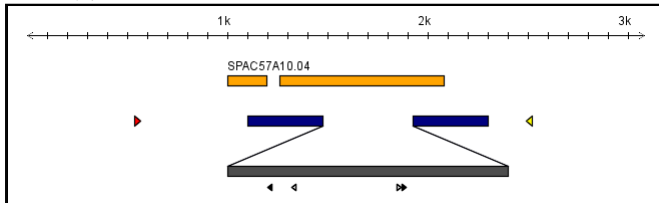

SPAC57A10.05c

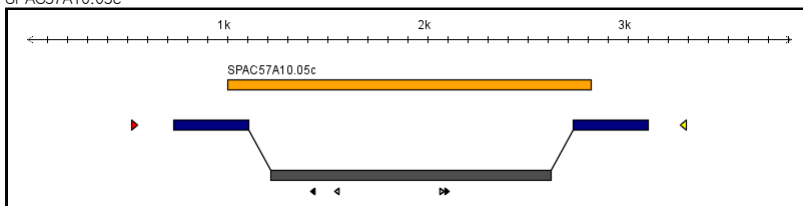

SPAC57A10.06

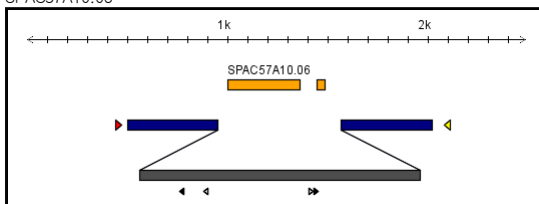

SPAC57A10.07

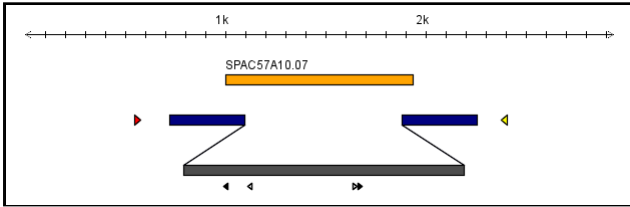

SPAC57A10.08c

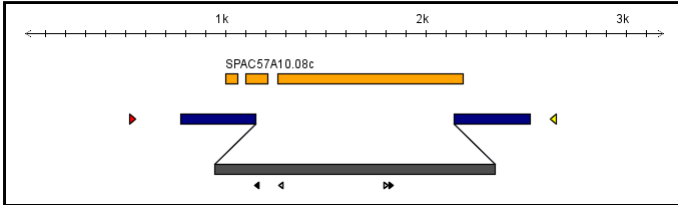

SPAC57A10.09c

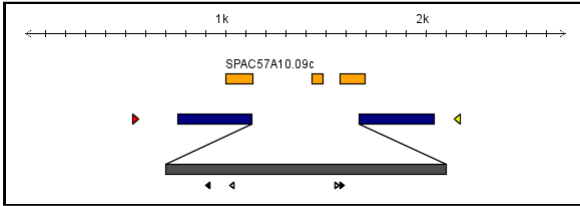

SPAC57A10.10c

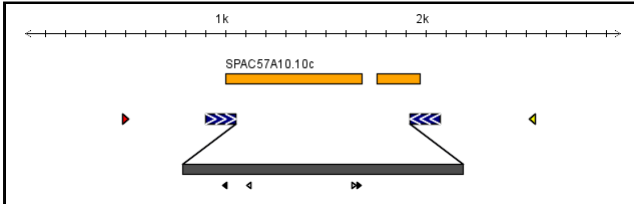

SPAC57A10.11c

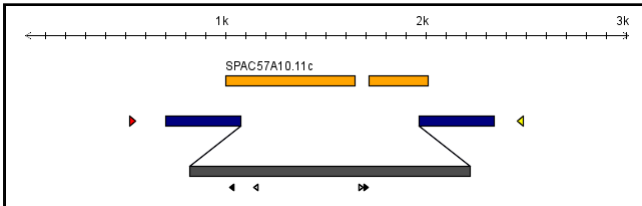

SPAC57A10.12c

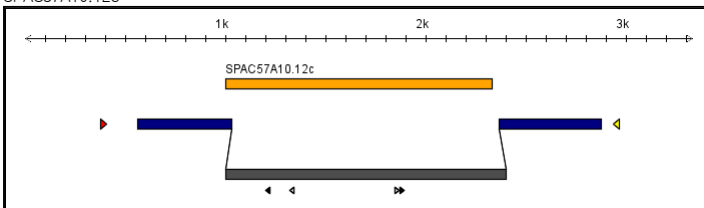

SPAC57A10.14

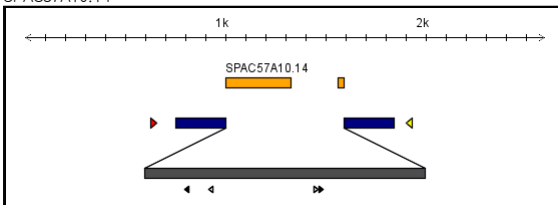

SPAC57A7.04c

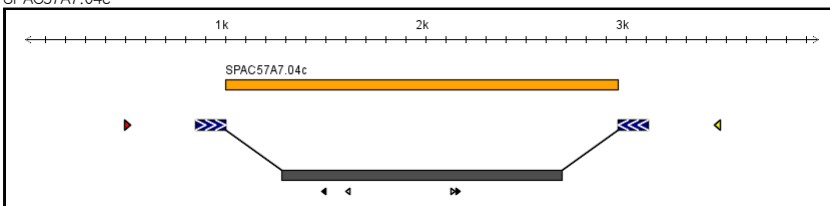

SPAC57A7.07c

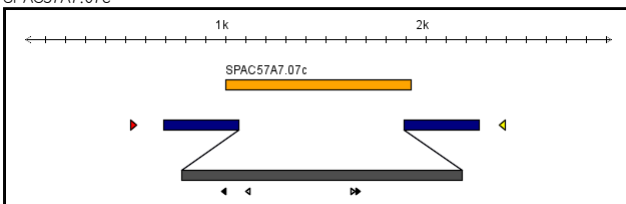



SPAC57A7.08

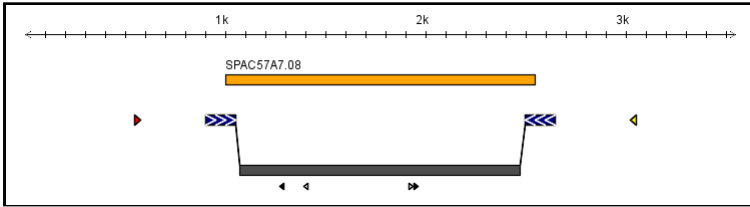

SPAC57A7.09

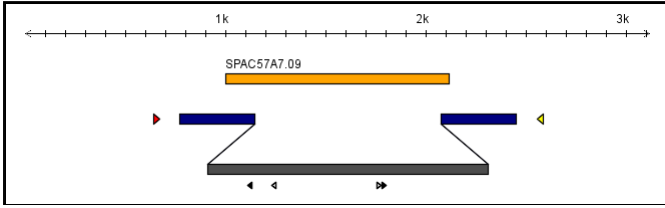

SPAC57A7.10c

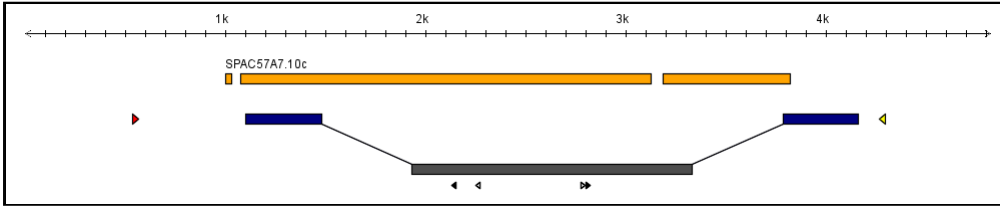

SPAC57A7.12

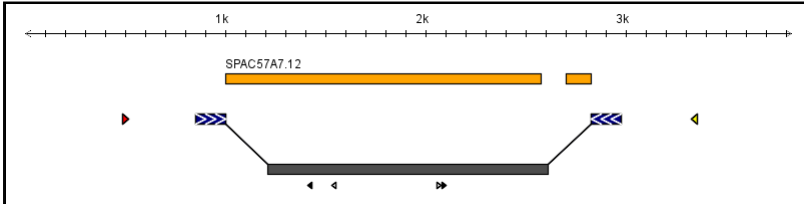

SPAC57A7.13

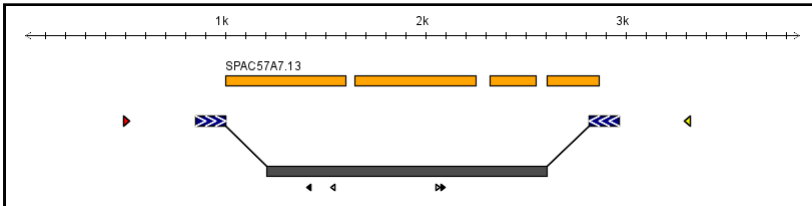

SPAC589.03c

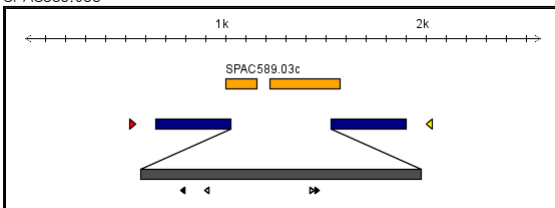

SPAC589.04

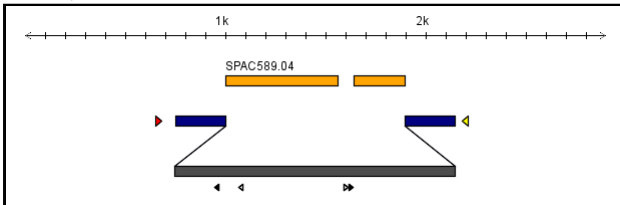

SPAC589.05c

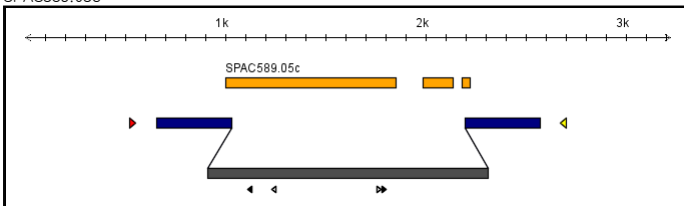

SPAC589.06c

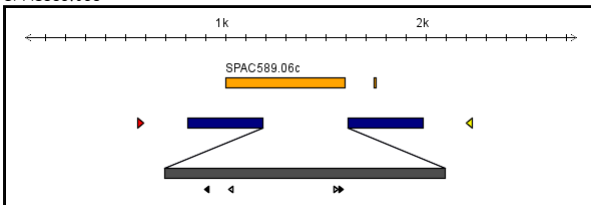

SPAC589.07c

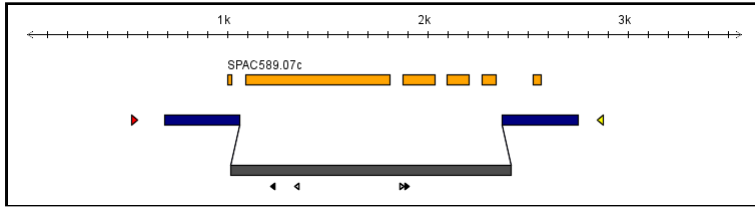

SPAC589.08c

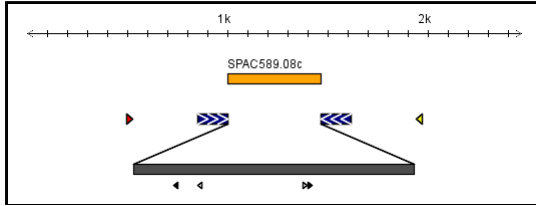

SPAC589.09

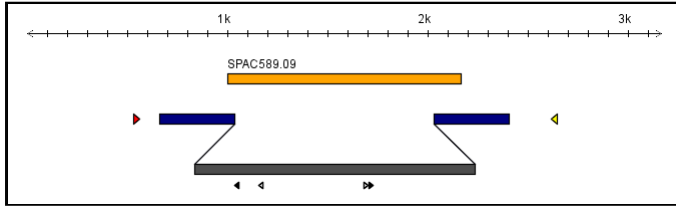

SPAC589.10c

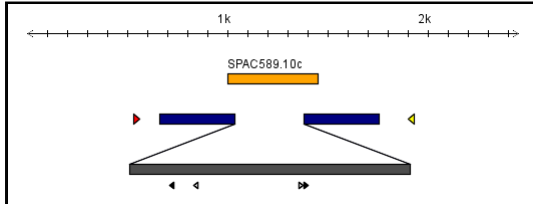

SPAC589.11

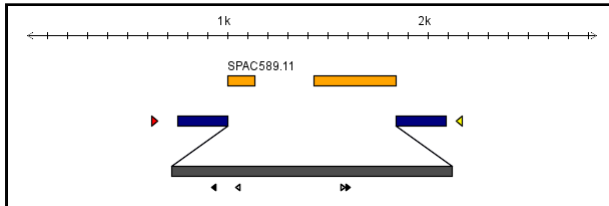

SPAC589.12

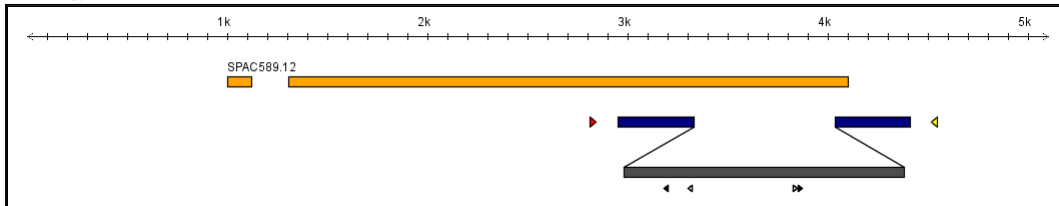

SPAC607.02c

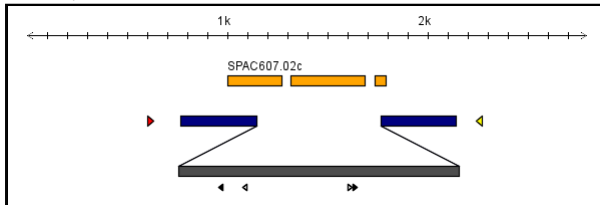

SPAC607.03c

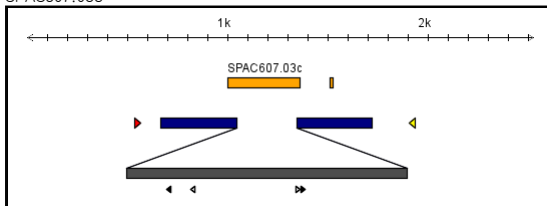

SPAC607.04

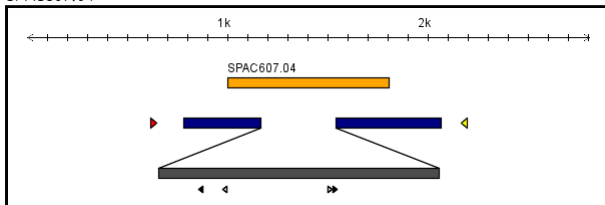

SPAC607.05

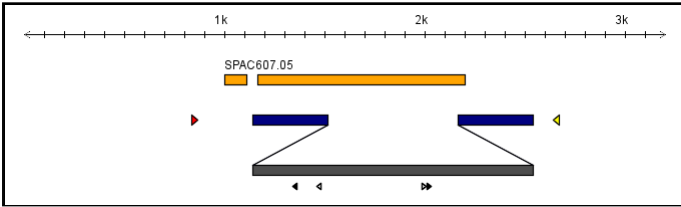

SPAC607.06c

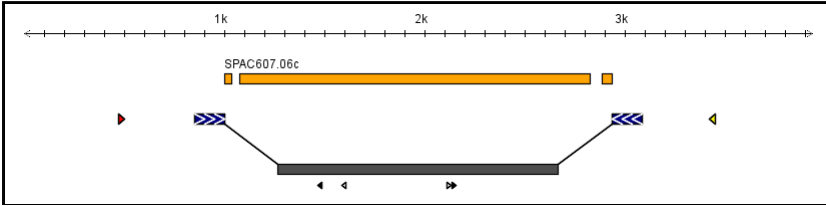

SPAC607.07c

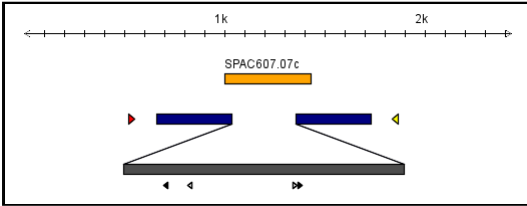

SPAC607.08c

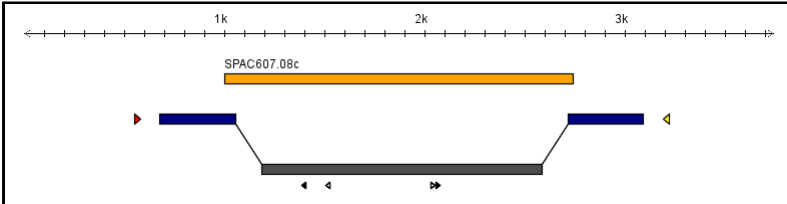

SPAC607.09c

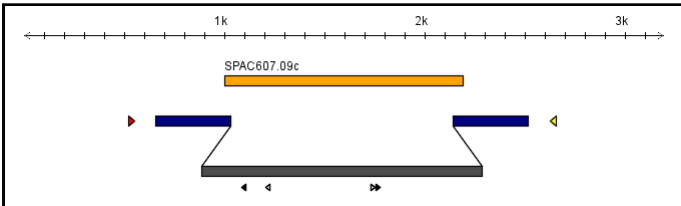

SPAC630.03

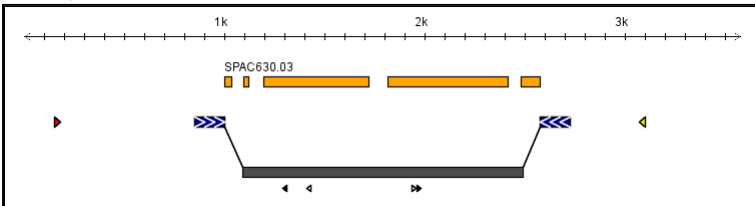

SPAC630.04c

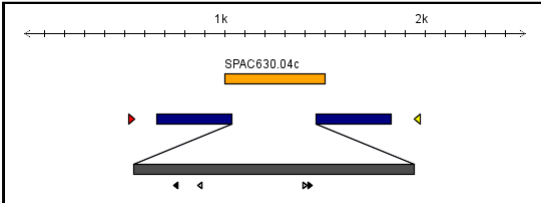

SPAC630.06c

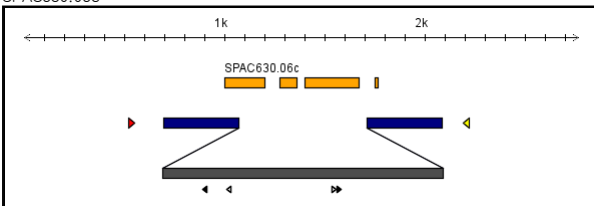

SPAC630.07c

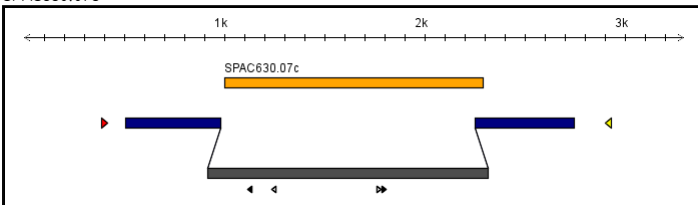

SPAC630.08c

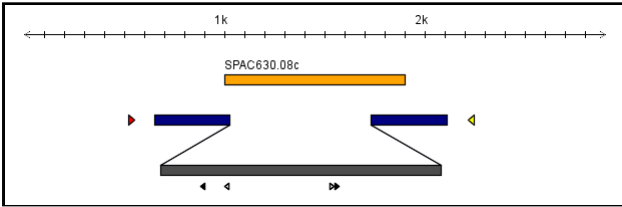

SPAC630.09c

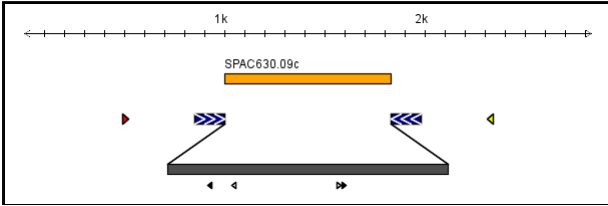

SPAC630.10

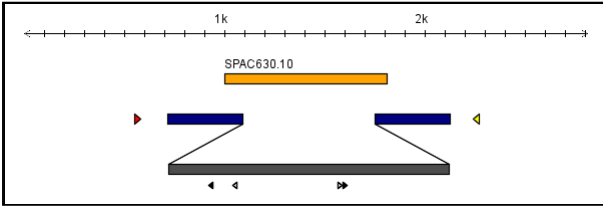

SPAC630.11

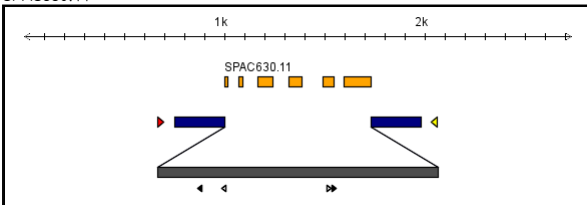

SPAC630.12

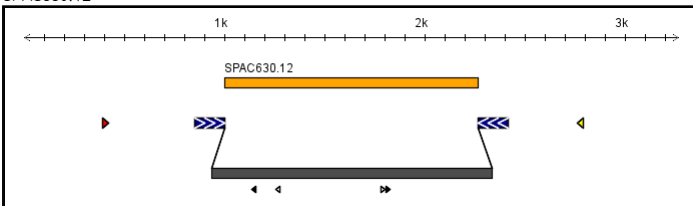

SPAC630.14c

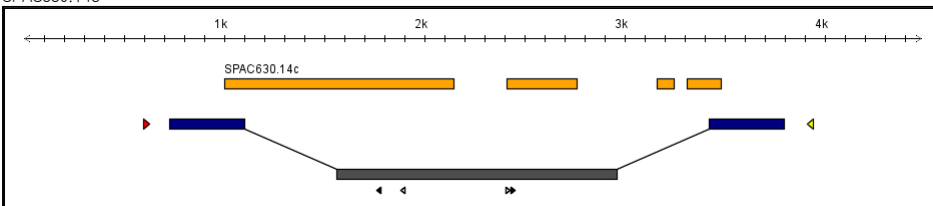

SPAC630.15

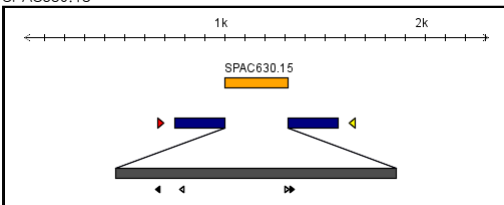

SPAC631.01c

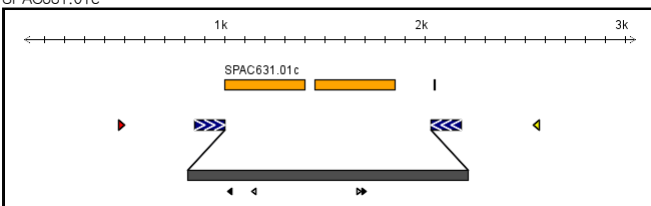

SPAC631.02

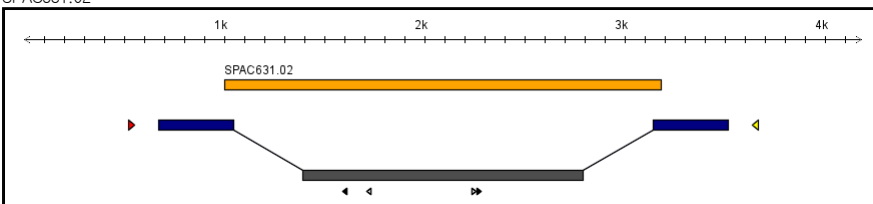

SPAC637.03

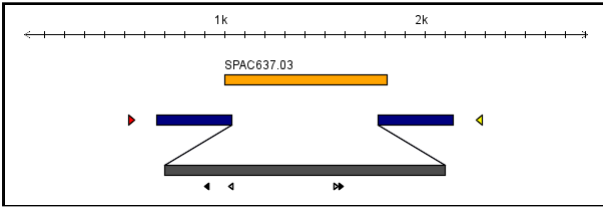

SPAC637.04

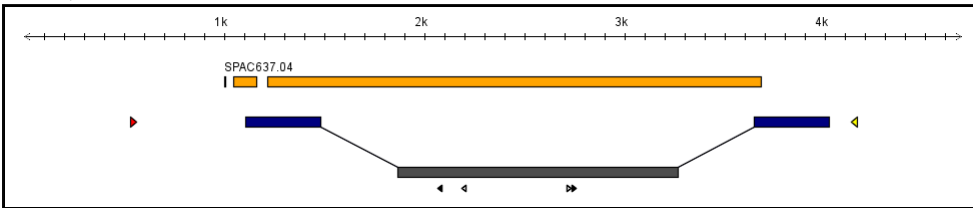

SPAC637.05c

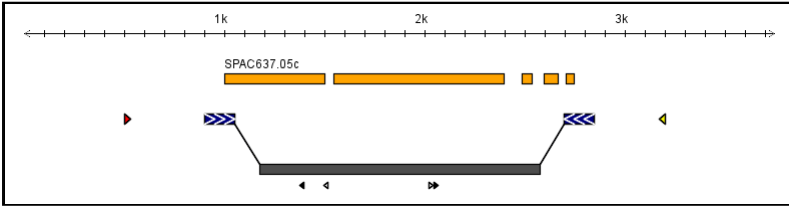

SPAC637.06

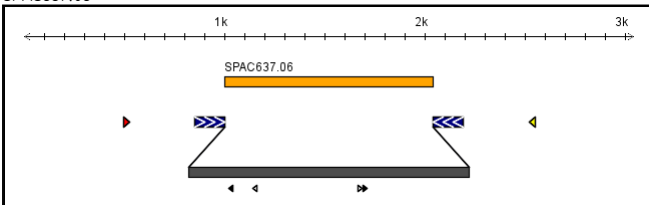

SPAC637.07

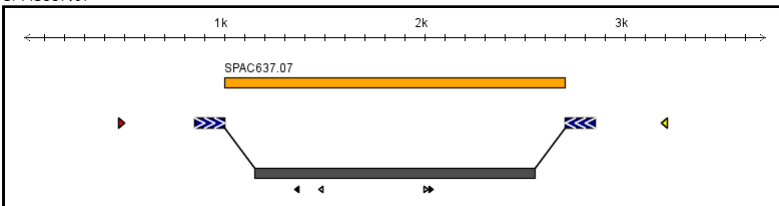

SPAC637.08

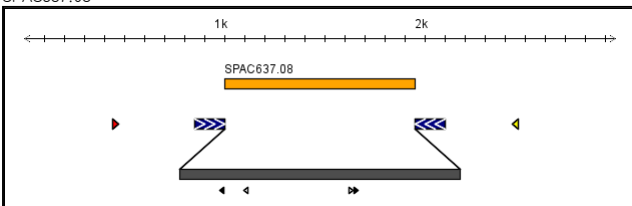

SPAC637.09

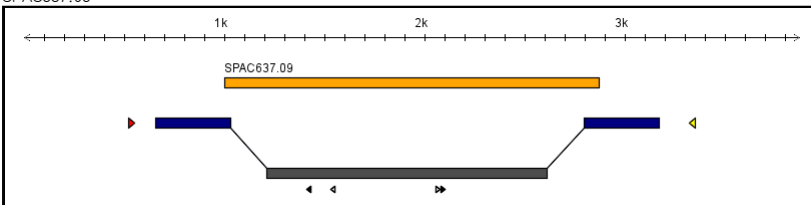

SPAC637.10c

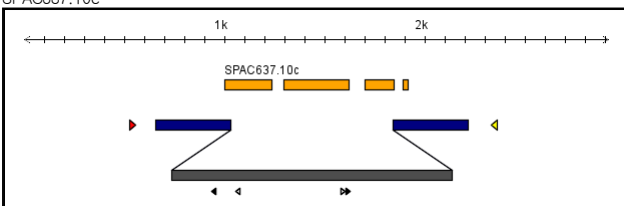

SPAC637.11

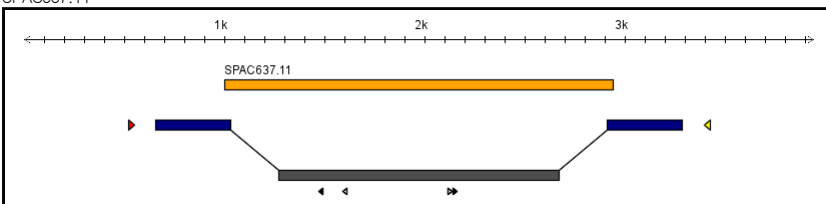

SPAC637.12c

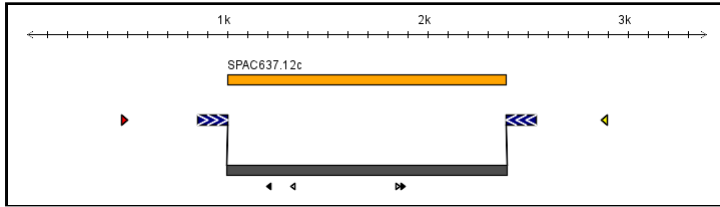

SPAC637.13c

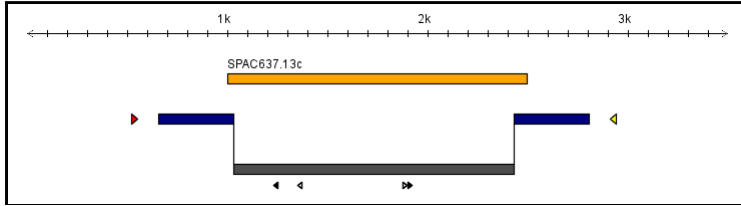

SPAC644.04

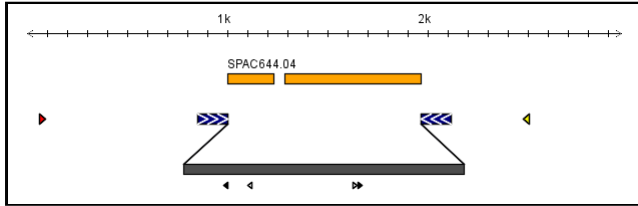

SPAC644.05c

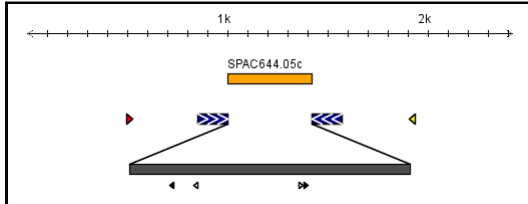

SPAC644.06c

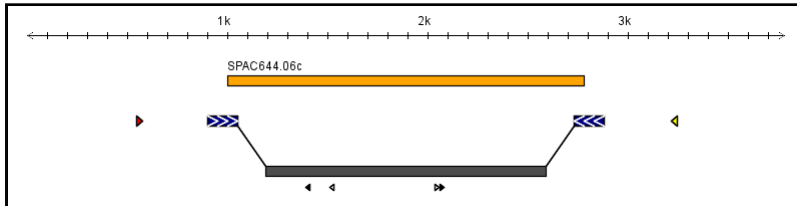

SPAC644.07

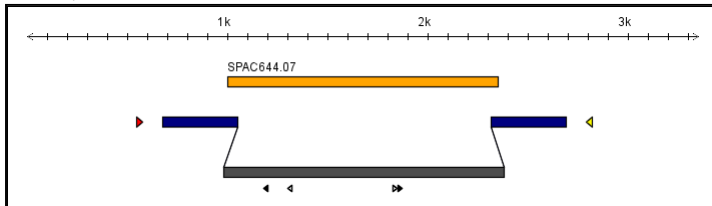

SPAC644.08

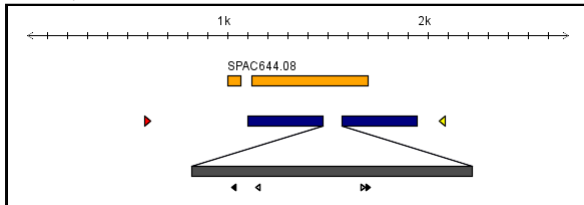

SPAC644.09

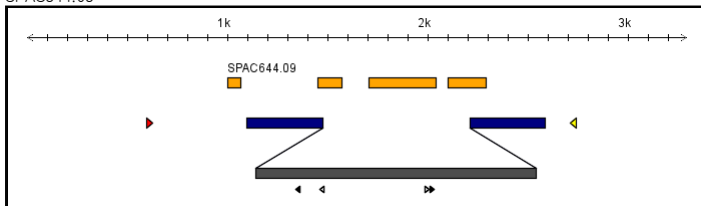

SPAC644.10

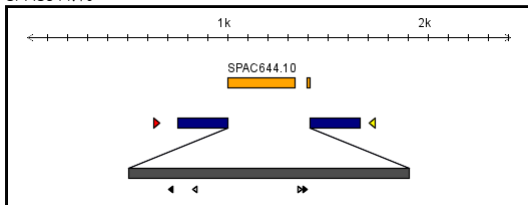

SPAC644.11c

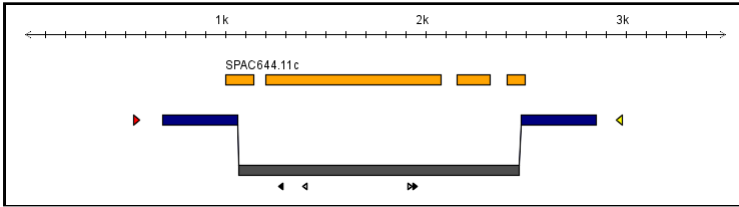

SPAC644.13c

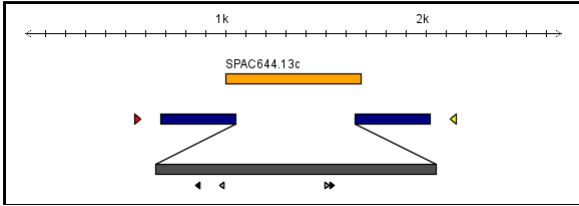

SPAC644.14c

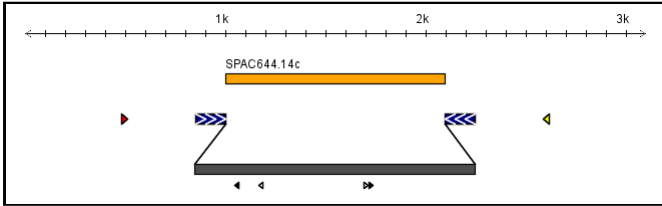

SPAC644.15

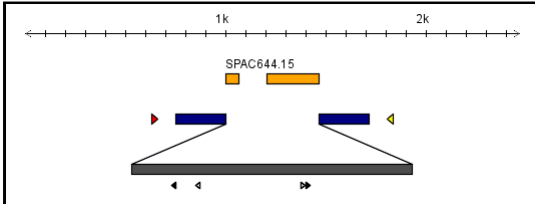

SPAC644.16

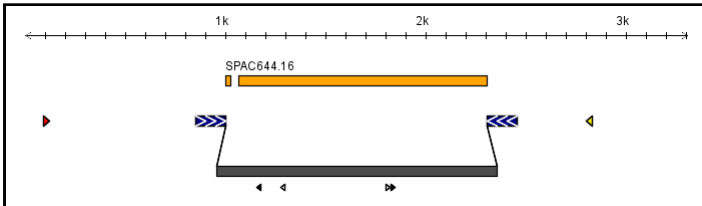

SPAC644.17c

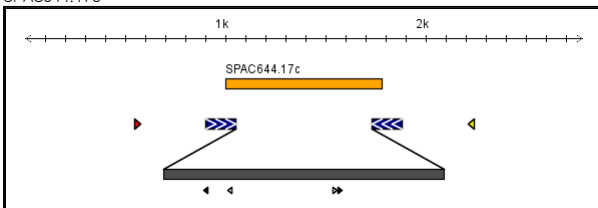

SPAC644.18c

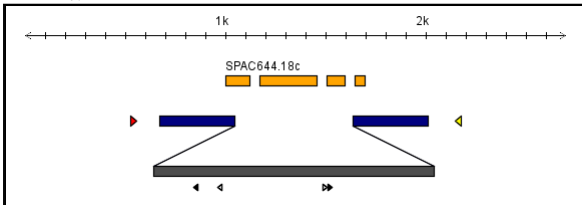

SPAC652.01

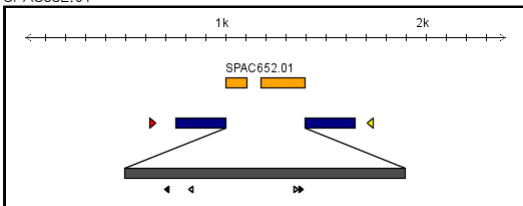

SPAC664.01c

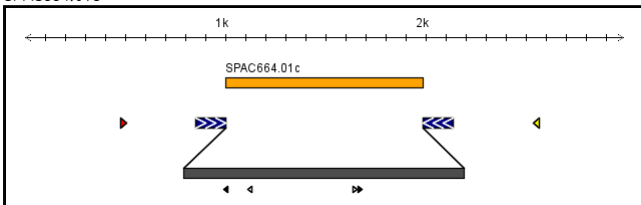

SPAC664.02c

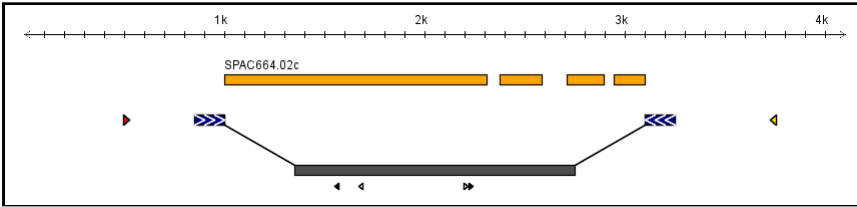

SPAC664.03

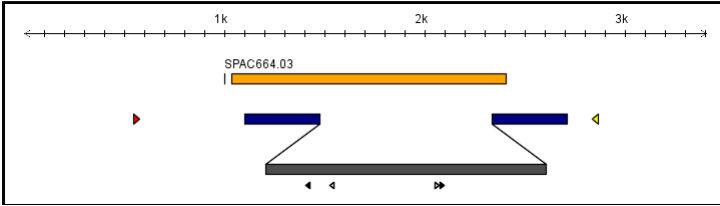

SPAC664.04c

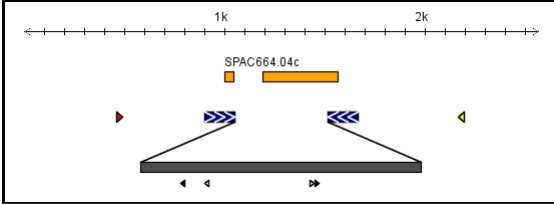

SPAC664.05

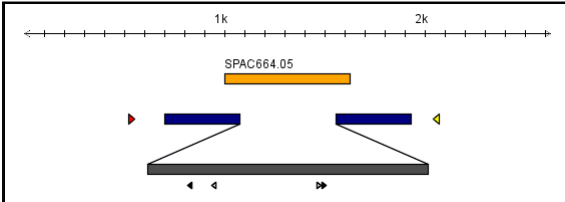

SPAC664.06

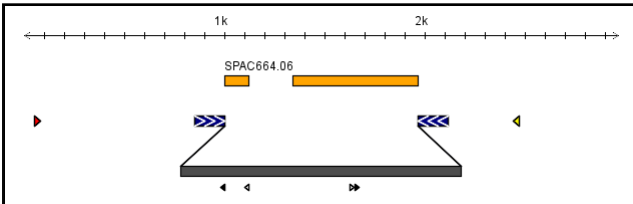

SPAC664.07c

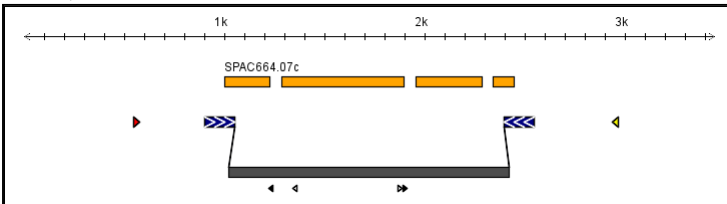

SPAC664.08c

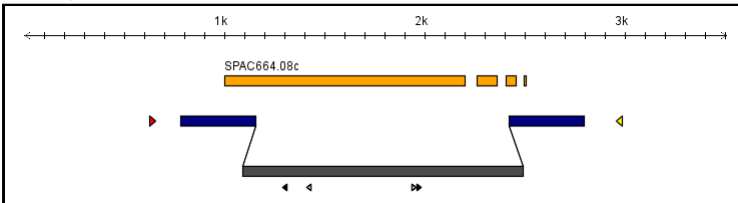

SPAC664.09

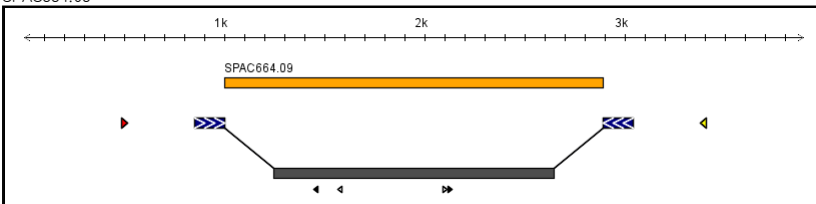

SPAC664.10

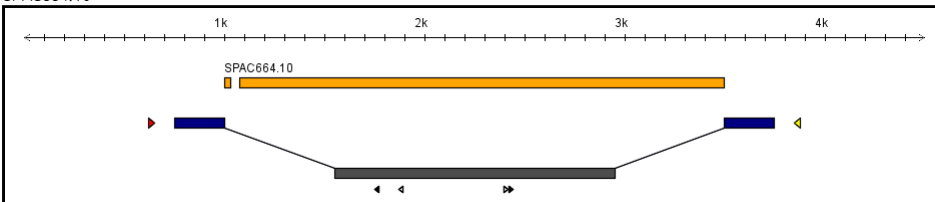



SPAC664.11

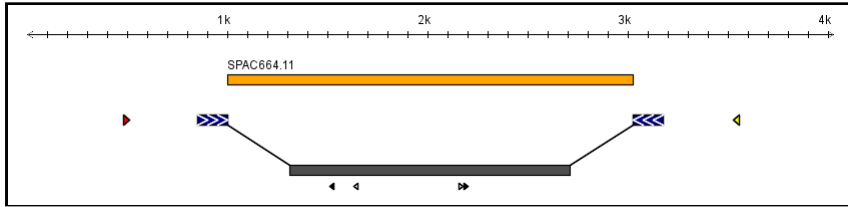

SPAC664.12c

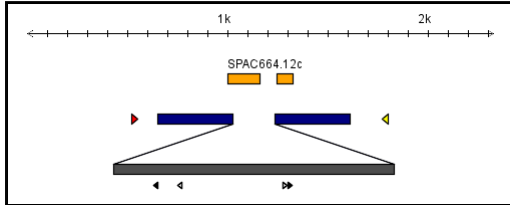

SPAC664.13

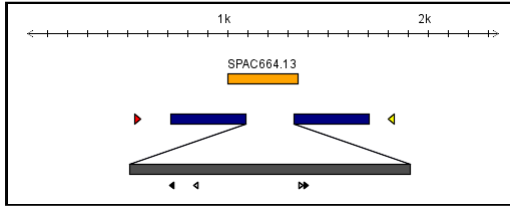

SPAC664.14

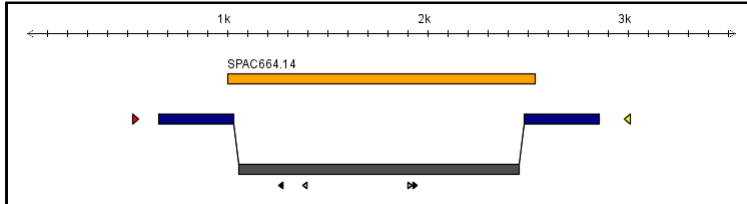

SPAC683.02c

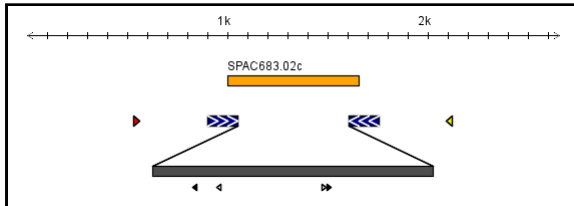

SPAC683.03

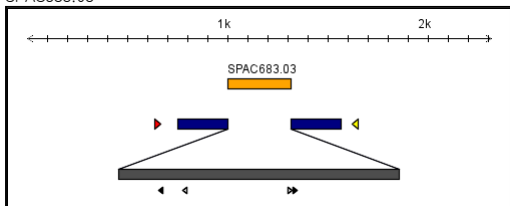

SPAC688.02c

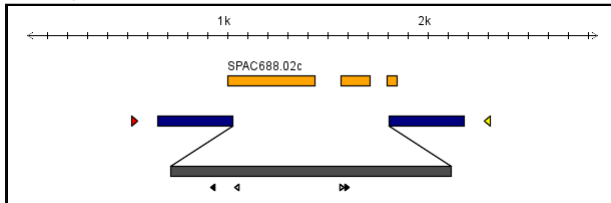

SPAC688.03c

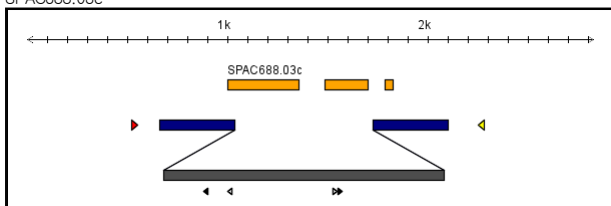

SPAC688.04c

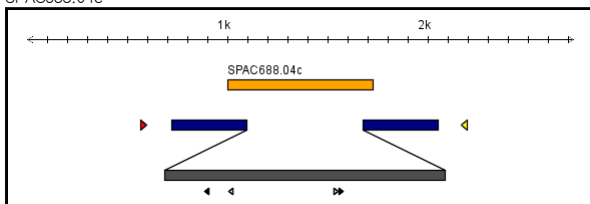

SPAC688.06c

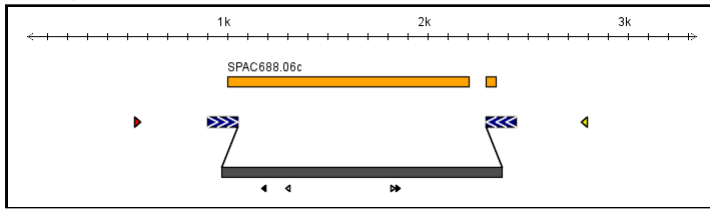

SPAC688.09

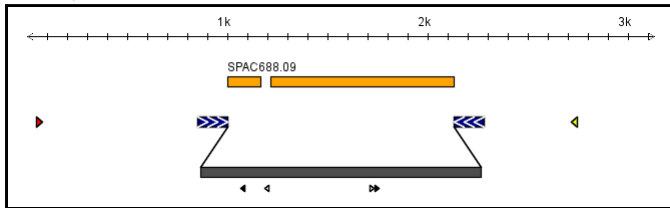

SPAC688.12c

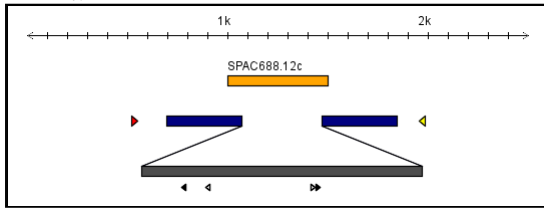

SPAC688.13

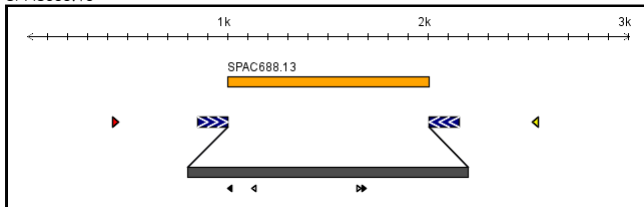

SPAC688.14

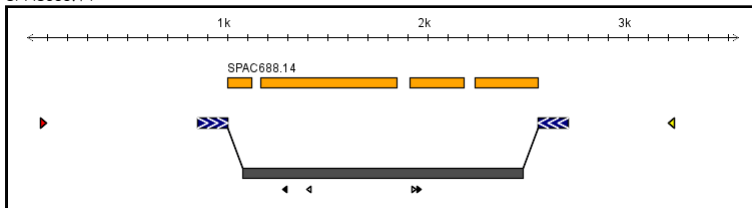

SPAC694.03

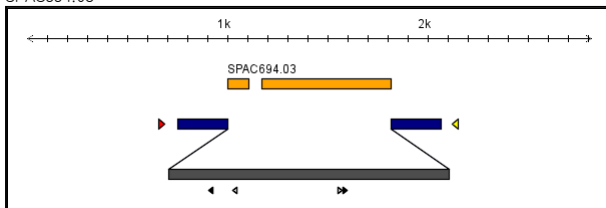

SPAC694.04c

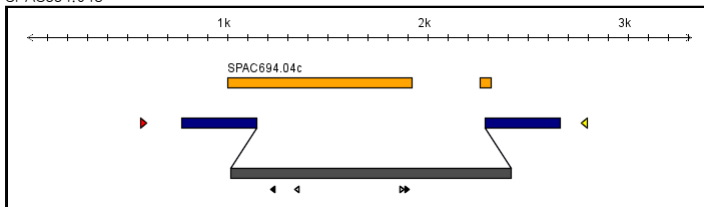

SPAC694.05c

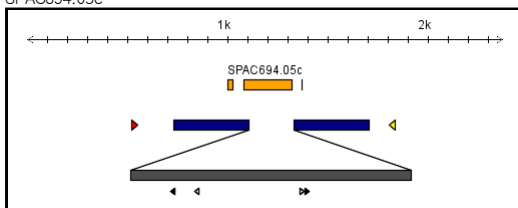

SPAC694.06c

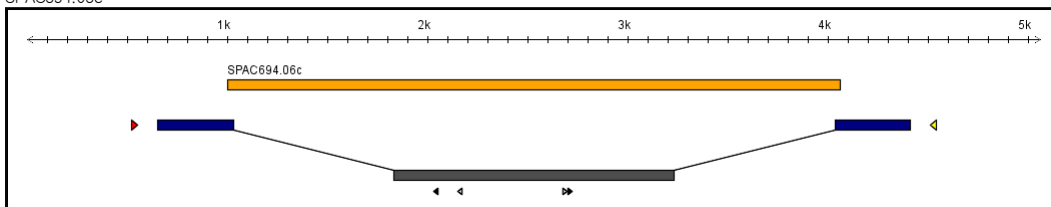

SPAC732.01

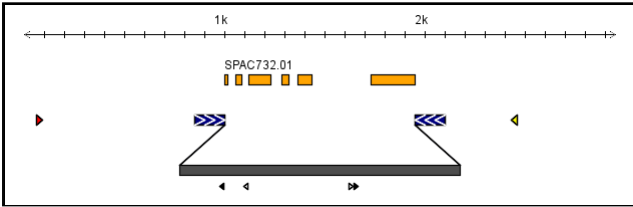

SPAC732.02c

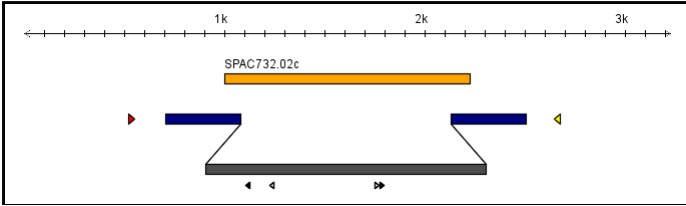

SPAC750.02c

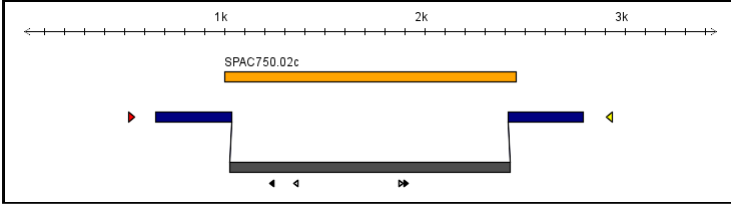

SPAC750.03c

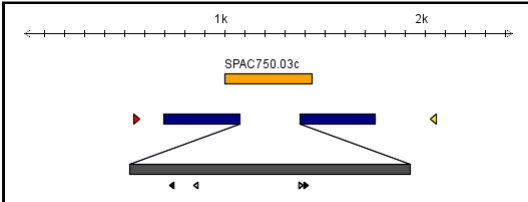

SPAC750.05c

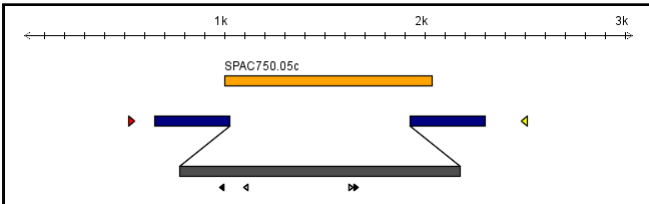

SPAC750.06c

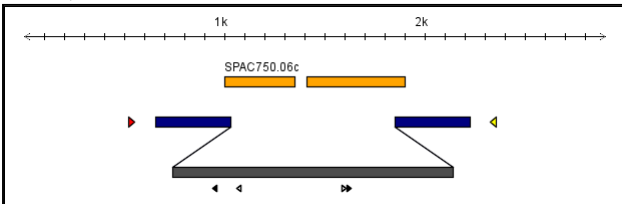

SPAC750.07c

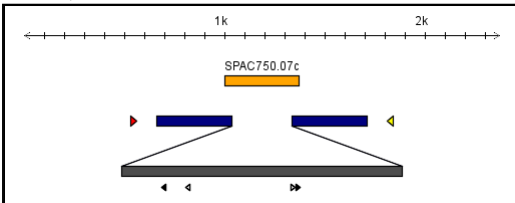

SPAC767.01c

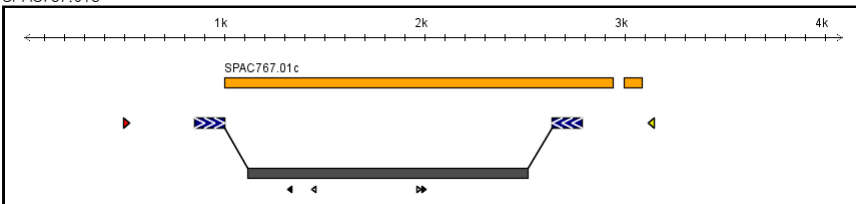

SPAC806.02c

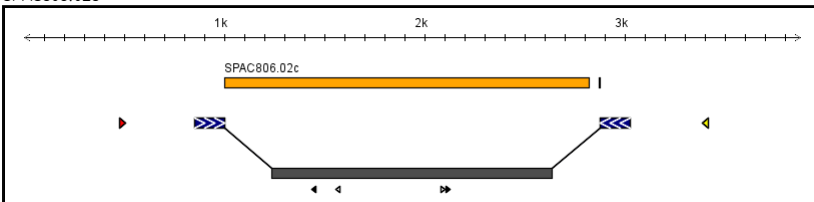

SPAC806.03c

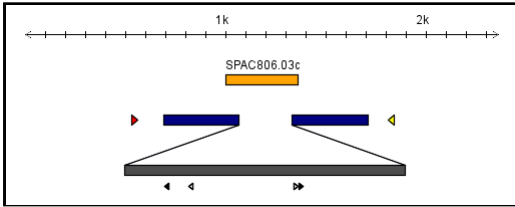

SPAC806.04c

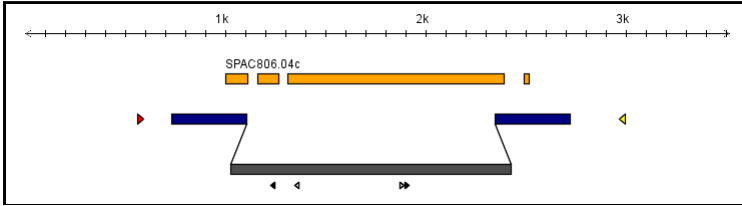

SPAC806.05

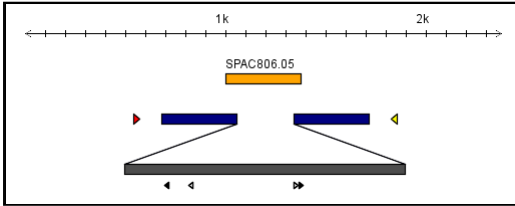

SPAC806.06c

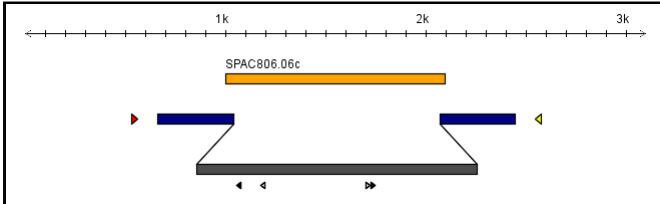

SPAC806.07

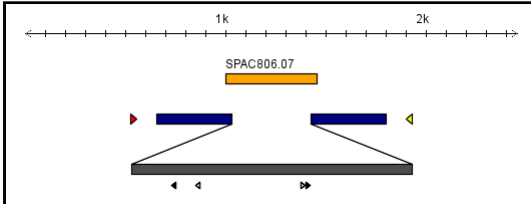

SPAC806.08c

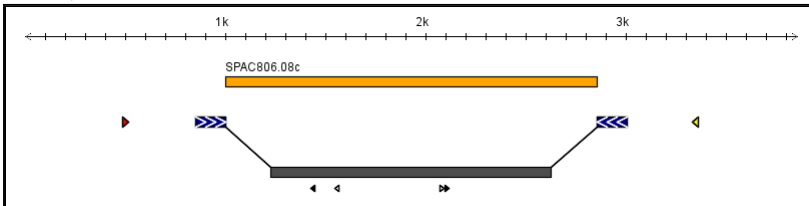

SPAC821.03c

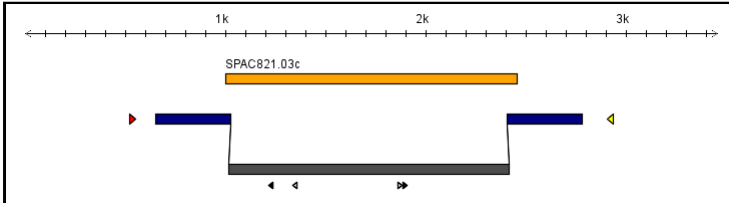

SPAC821.04c

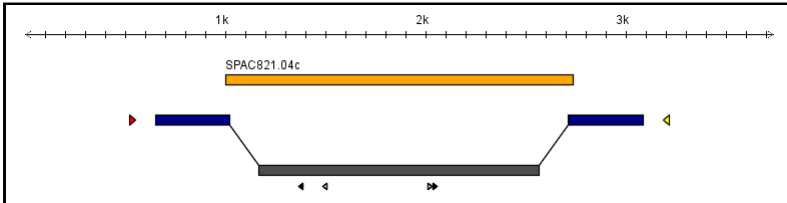

SPAC821.05

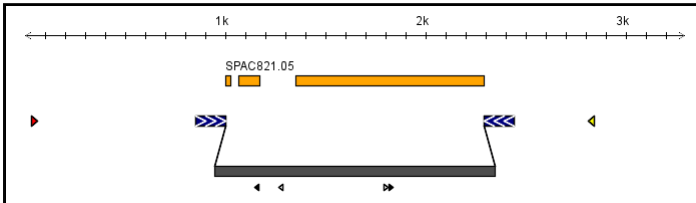

SPAC821.06

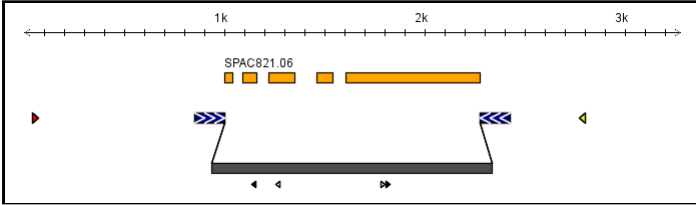

SPAC821.07c

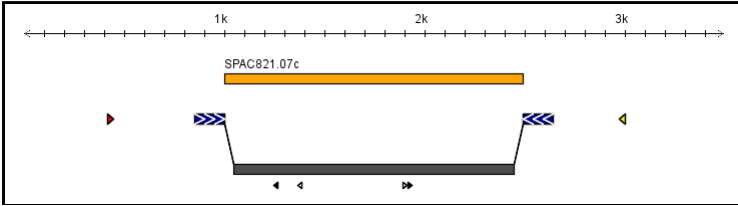

SPAC821.08c

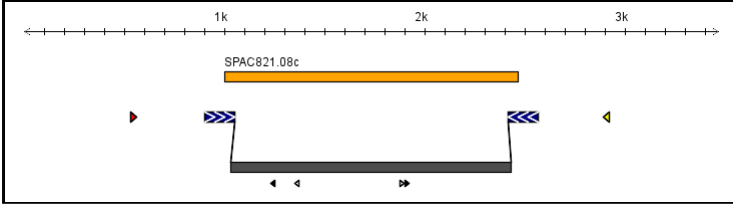

SPAC821.10c

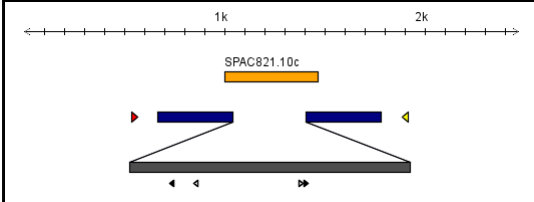

SPAC821.11

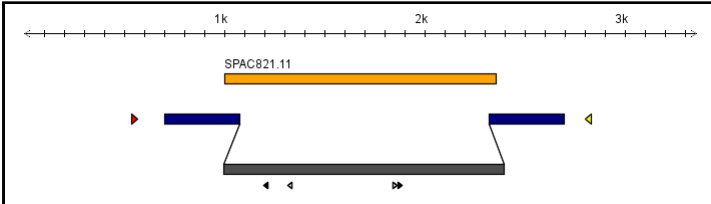

SPAC821.12

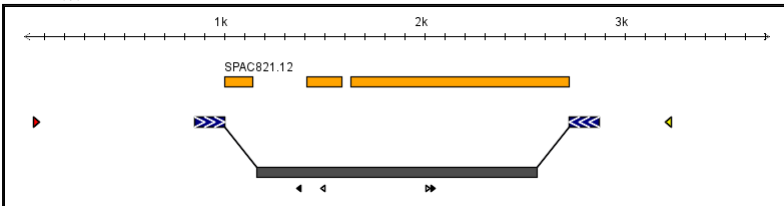

SPAC823.02

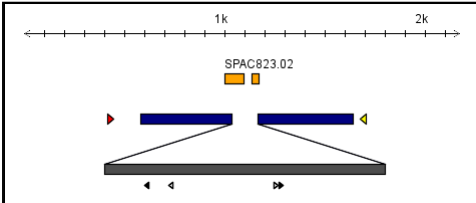

SPAC823.03

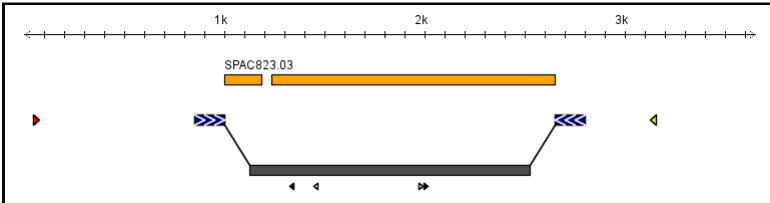

SPAC823.04

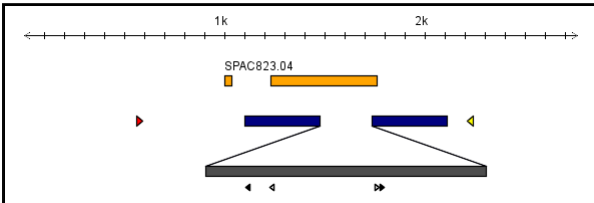

SPAC823.05c

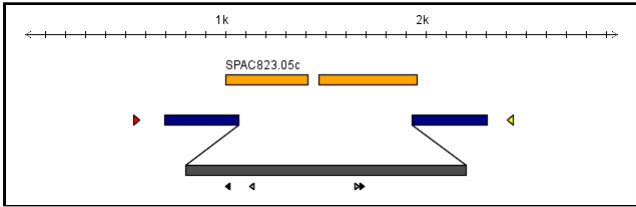

SPAC823.06

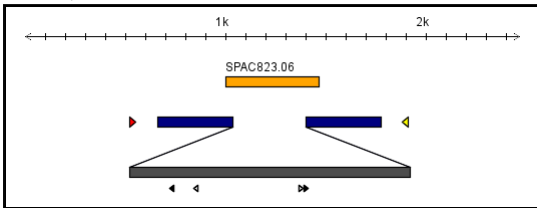

SPAC823.07

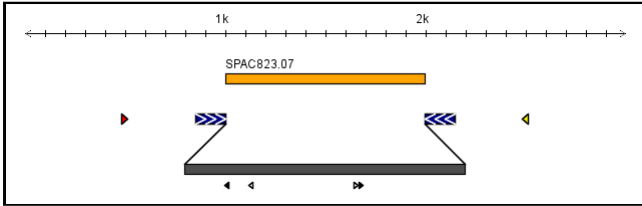

SPAC823.08c

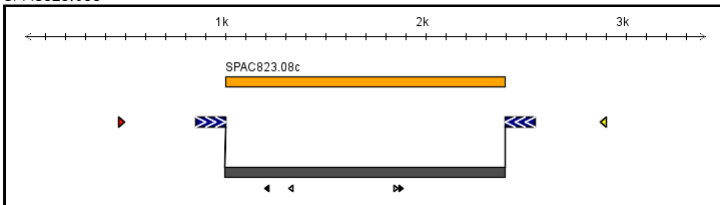

SPAC823.09c

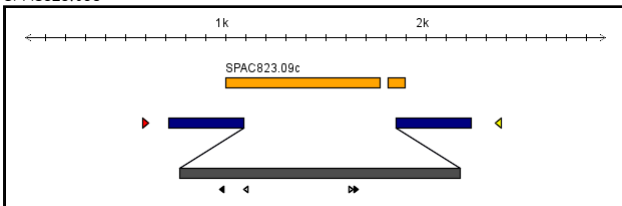

SPAC823.10c

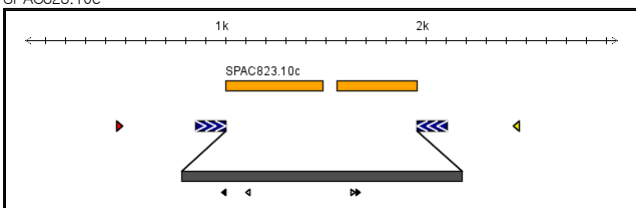

SPAC823.11

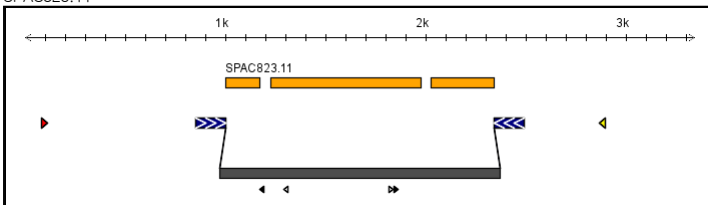

SPAC823.12

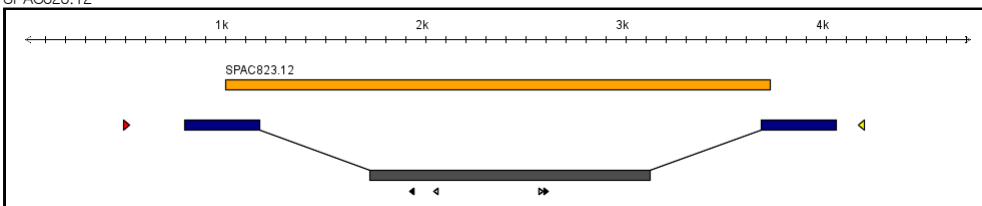

SPAC823.13c

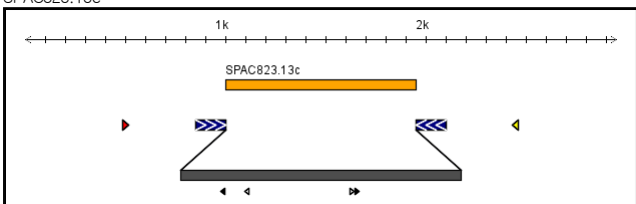

SPAC823.14

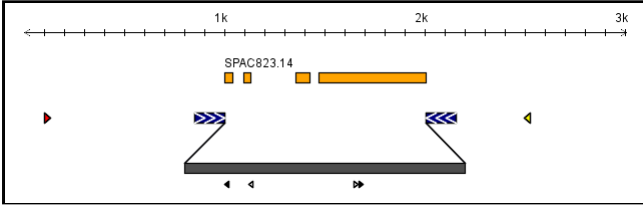

SPAC823.15

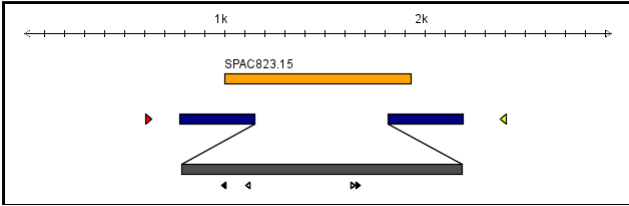

SPAC823.16c

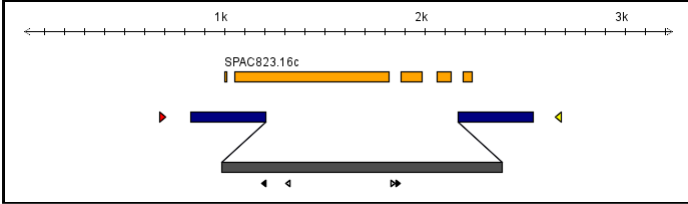

SPAC824.03c

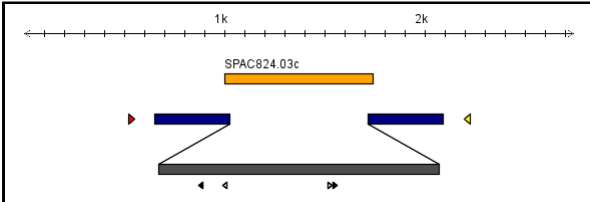

SPAC824.04

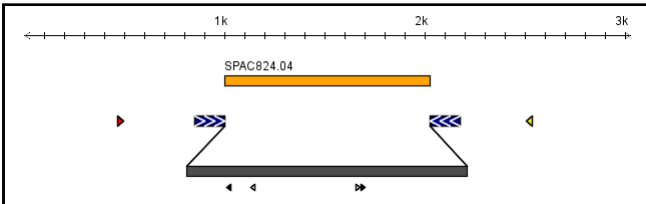

SPAC824.05

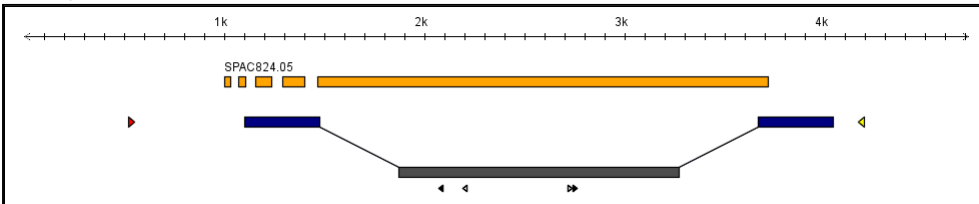

SPAC824.07

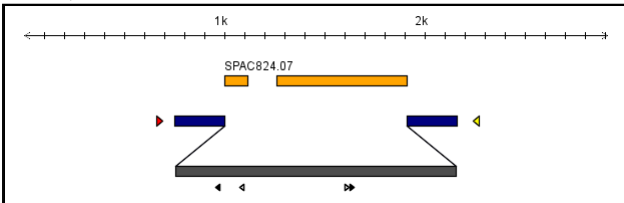

SPAC824.08

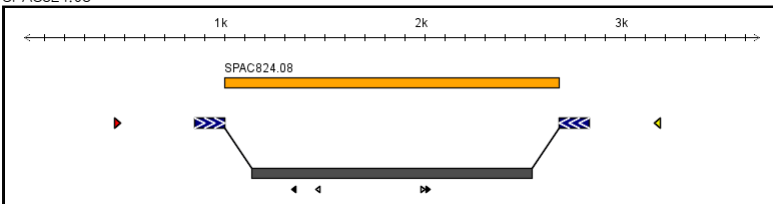

SPAC824.09c

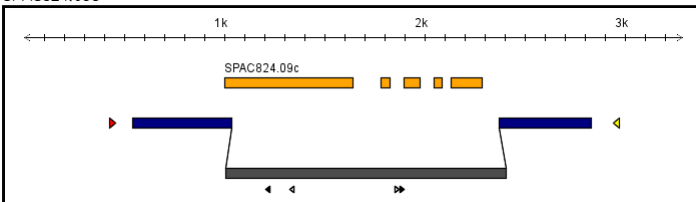

SPAC869.01

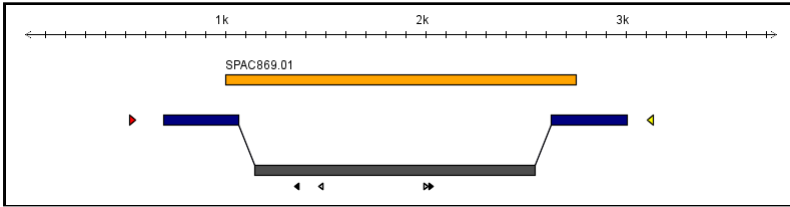

SPAC869.02c

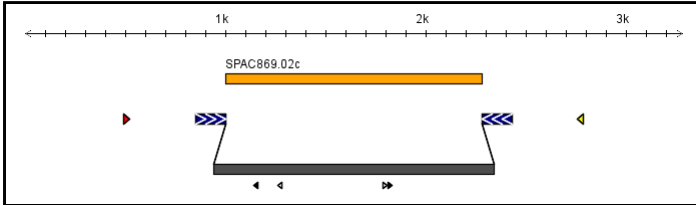

SPAC869.03c

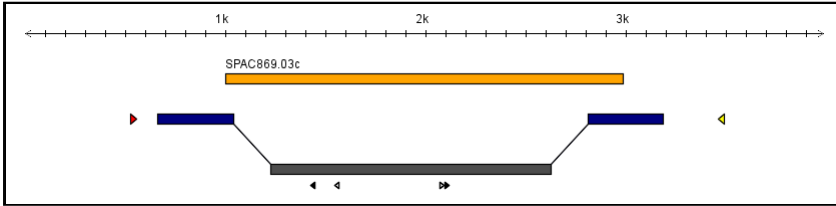

SPAC869.04

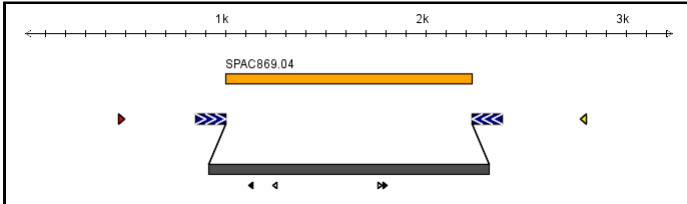

SPAC869.05c

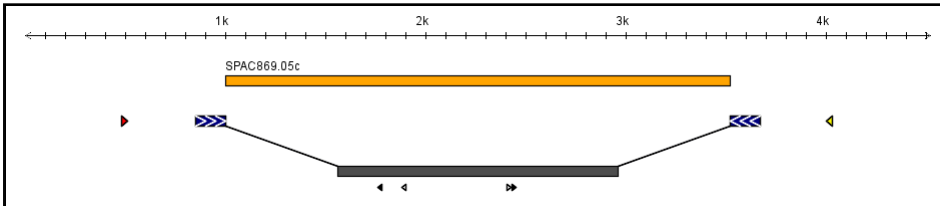

SPAC869.06c

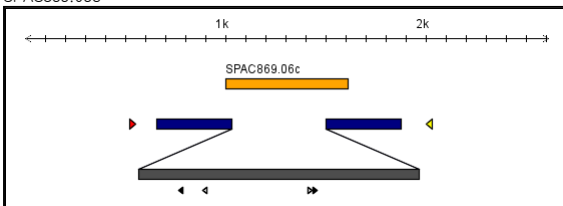

SPAC869.07c

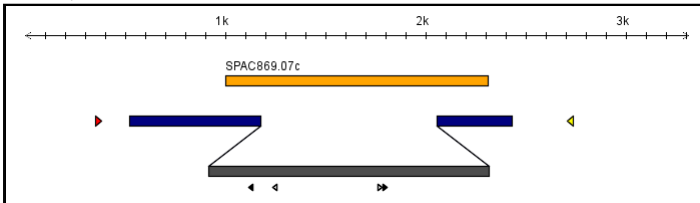

SPAC869.08

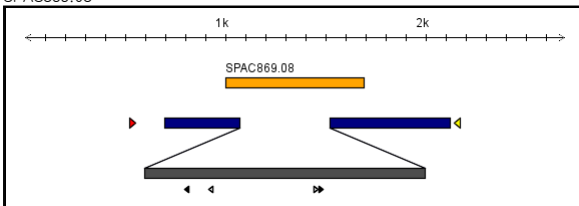

SPAC869.09

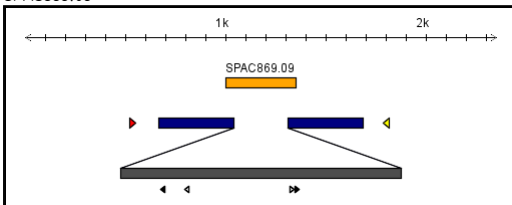



SPAC869.10c

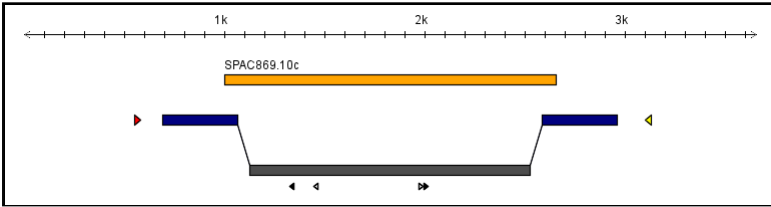

SPAC869.11

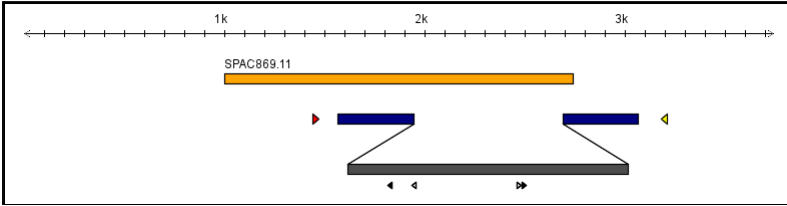

SPAC890.02c

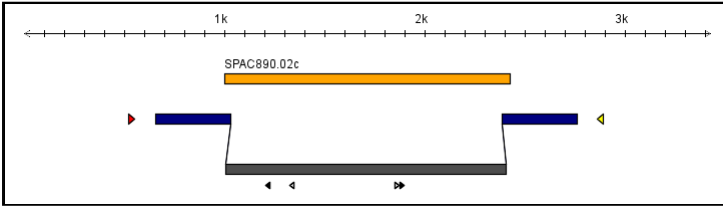

SPAC890.03

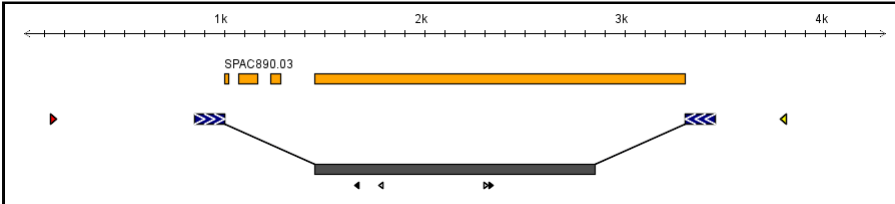

SPAC890.04c

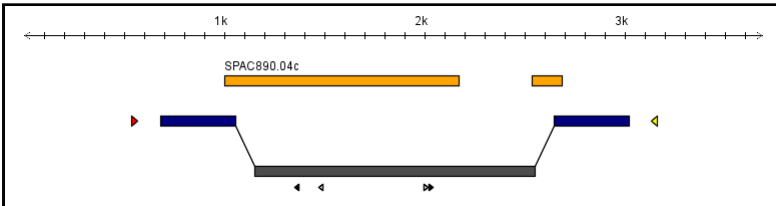

SPAC890.05

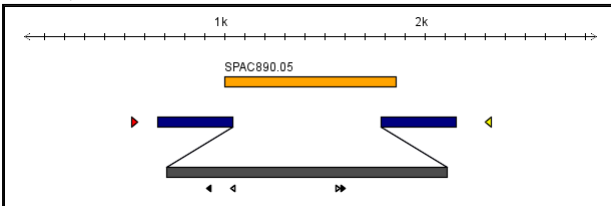

SPAC890.07c

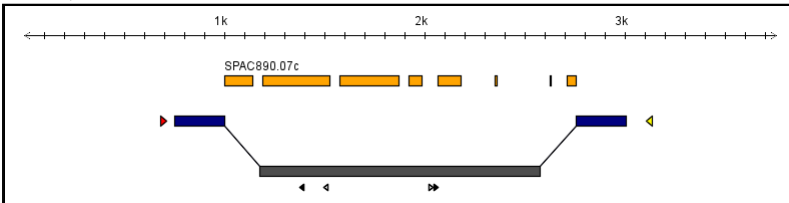

SPAC890.08

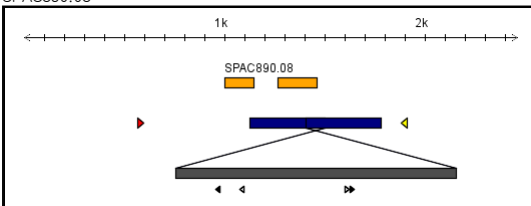

SPAC922.03

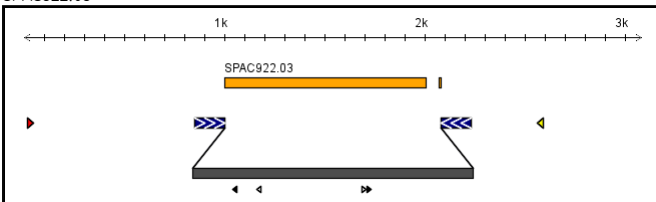

SPAC922.04

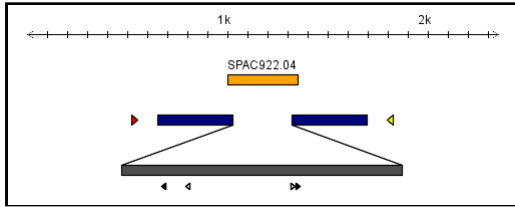

SPAC922.05c

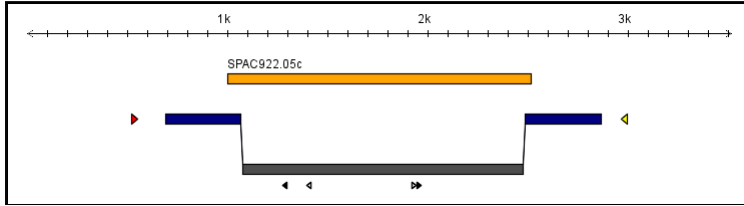

SPAC922.06

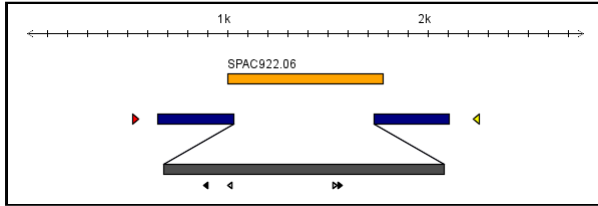

SPAC922.07c

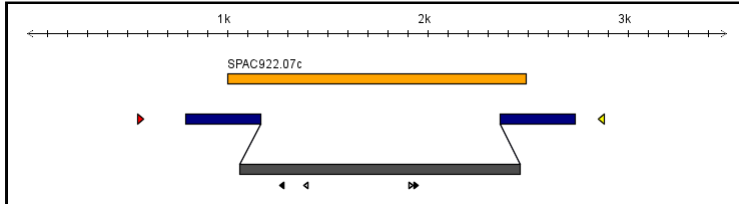

SPAC926.02

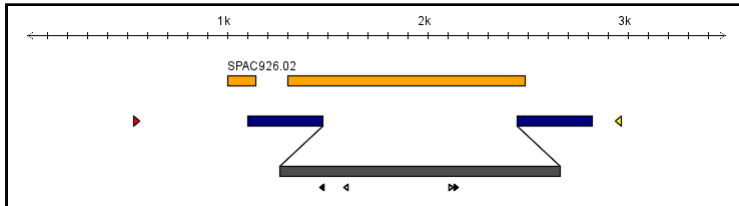

SPAC926.03

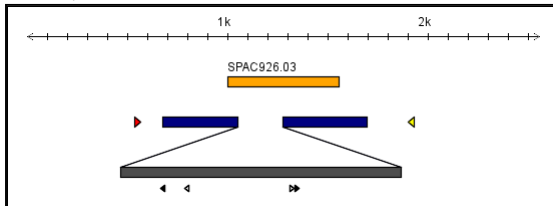

SPAC926.04c

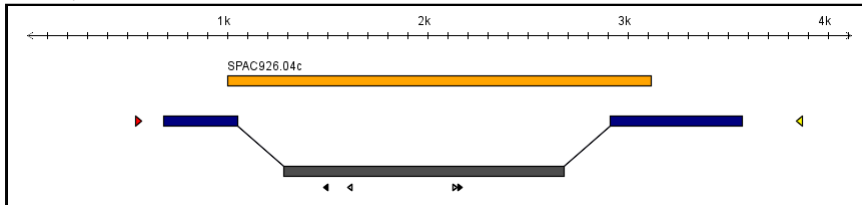

SPAC926.05c

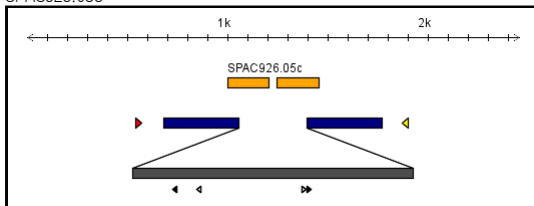

SPAC926.06c

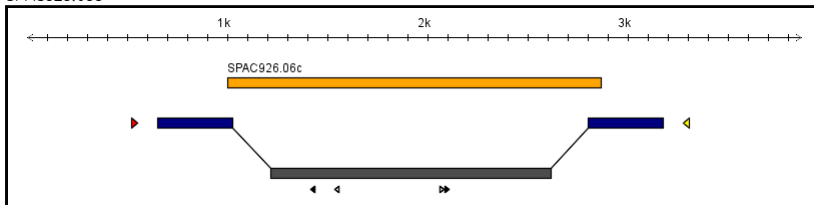

SPAC926.07c

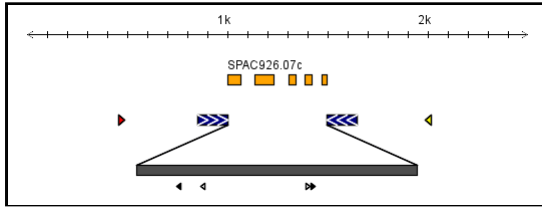

SPAC926.08c

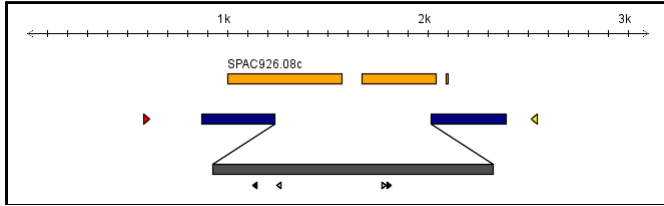

SPAC959.02

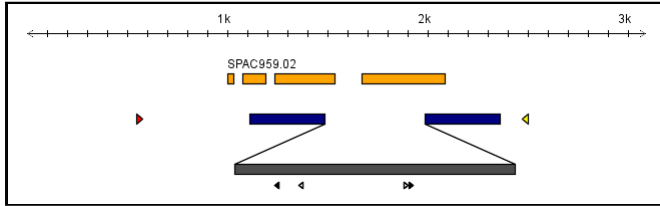

SPAC959.03c

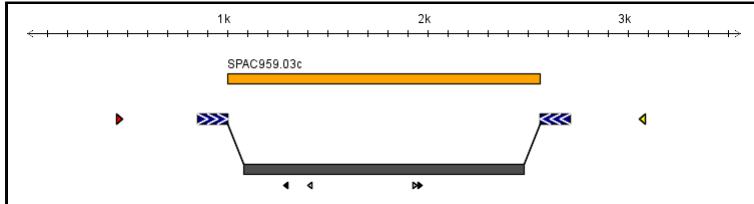

SPAC959.04c

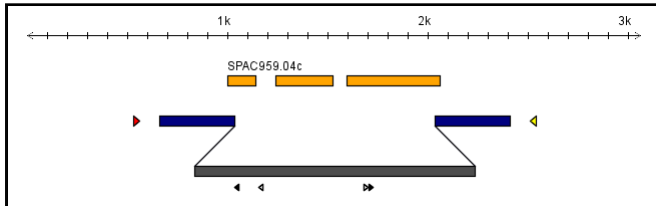

SPAC959.05c

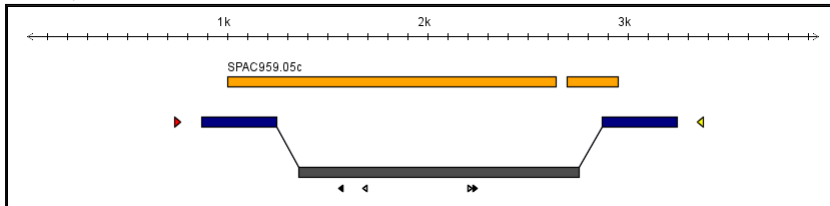

SPAC959.06c

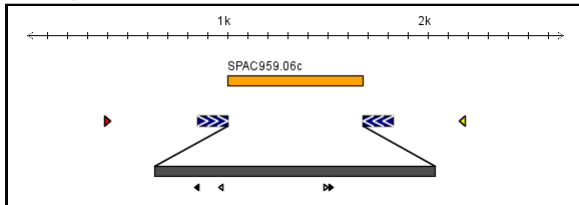

SPAC959.07

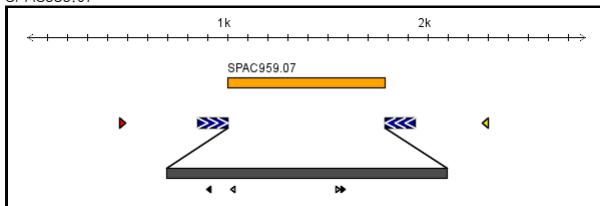

SPAC959.08

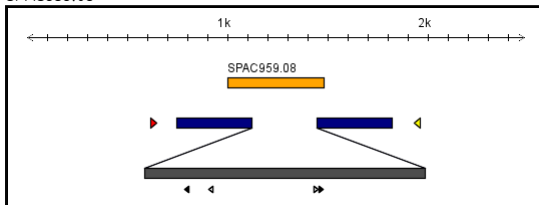

SPAC959.09c

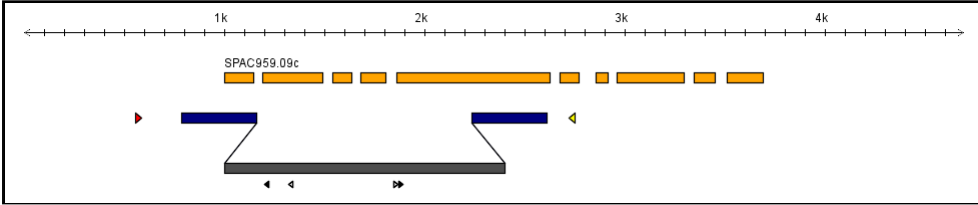

SPAC959.10

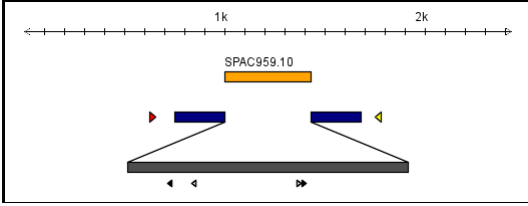

SPAC977.01

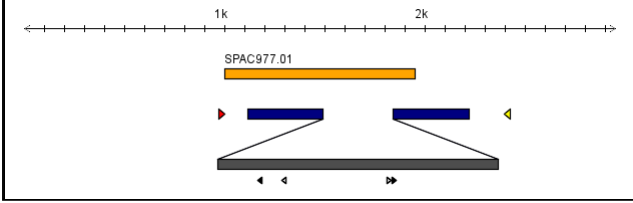

SPAC977.02

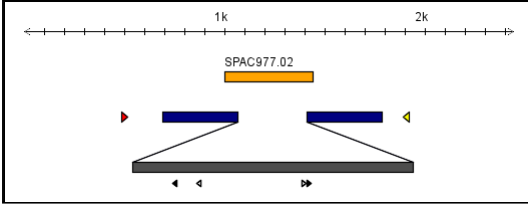

SPAC977.03

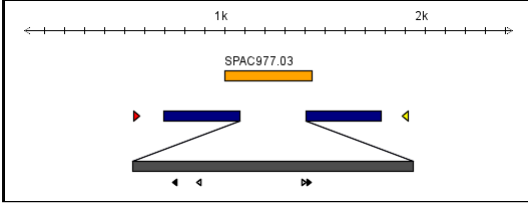

SPAC977.05c

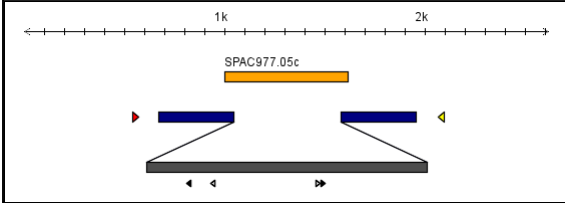

SPAC977.07c

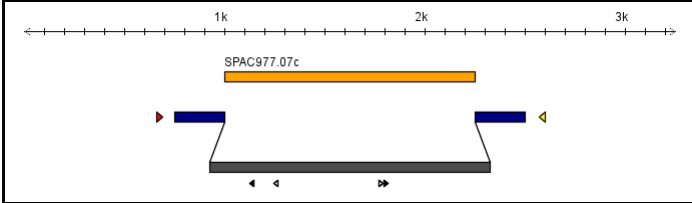

SPAC977.08

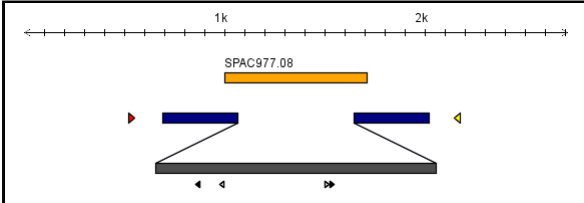

SPAC977.09c

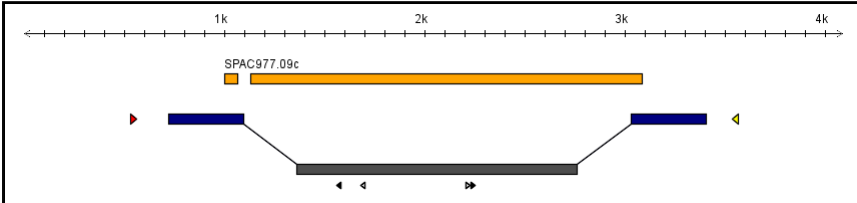

SPAC977.10

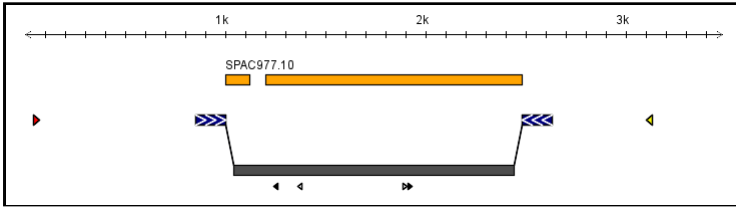

SPAC977.11

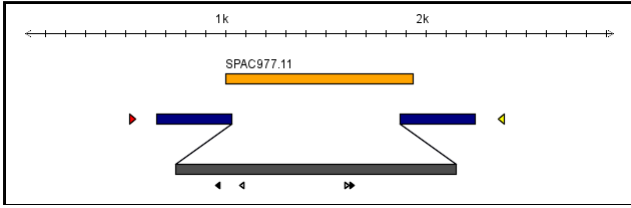

SPAC977.12

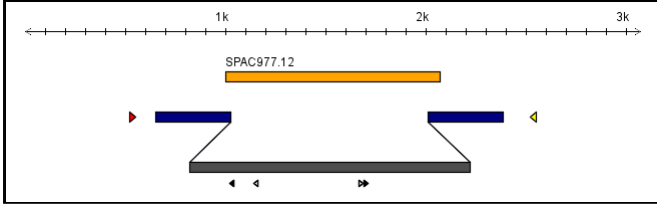

SPAC977.14c

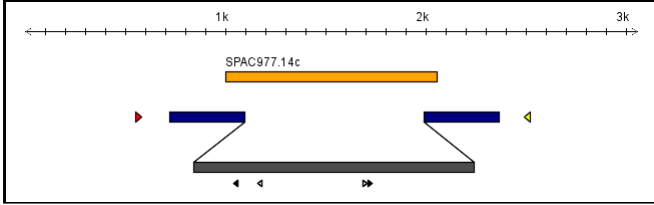

SPAC977.15

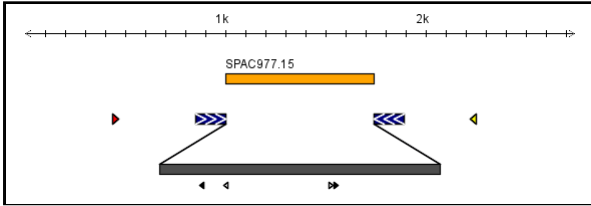

SPAC977.16c

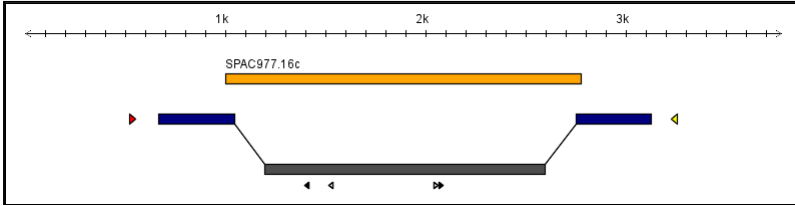

SPAC977.17

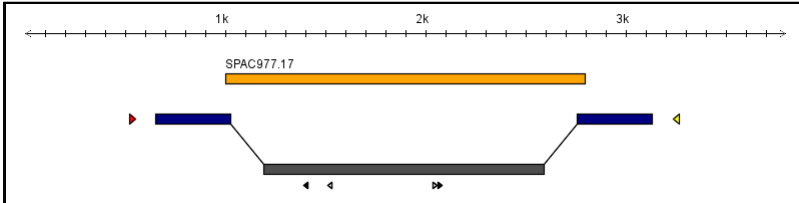

SPAC1006.03c

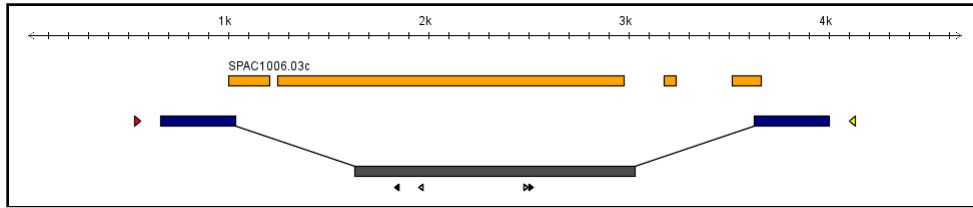

SPAC1006.06

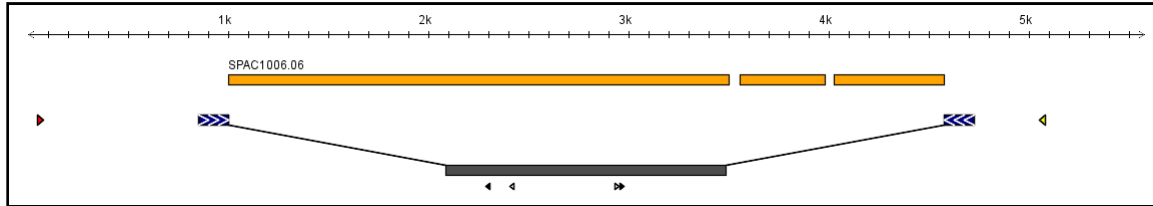

SPAC1039.11c

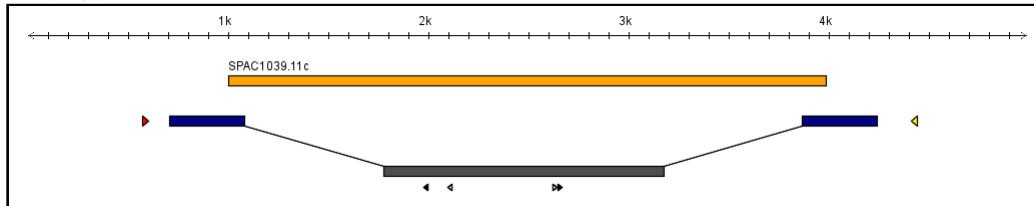

SPAC105.03c

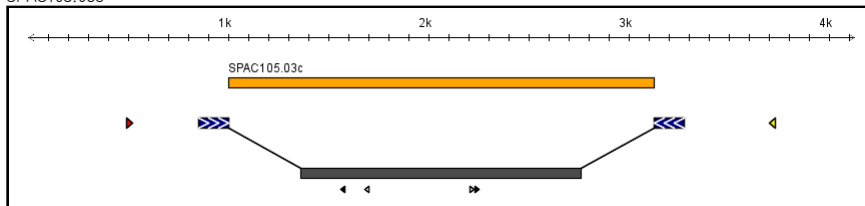

SPAC1071.02

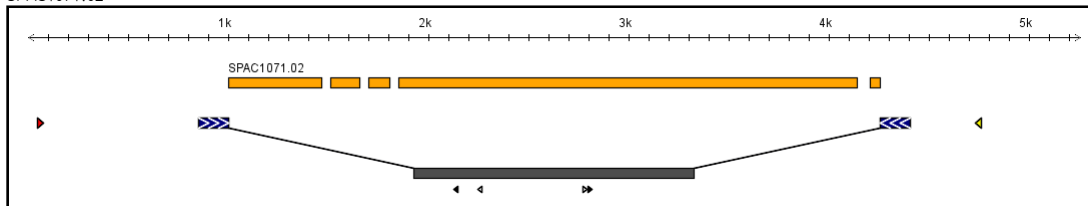

SPAC110.02

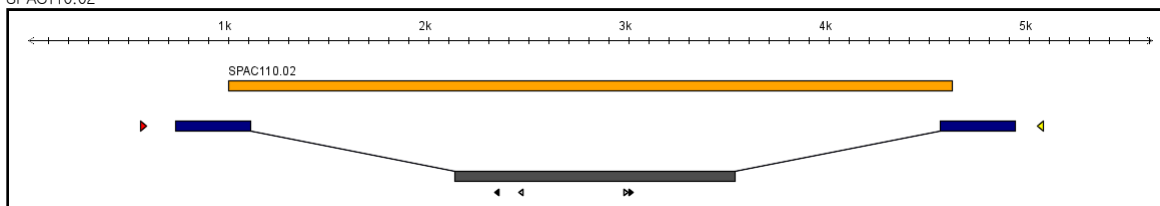

SPAC1142.03c

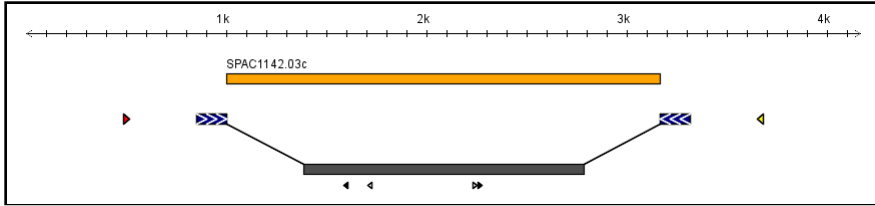

SPAC1142.08

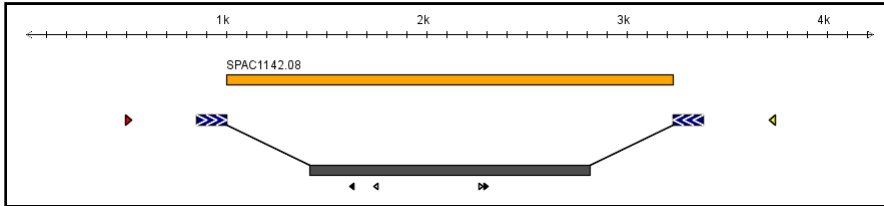

SPAC1250.01

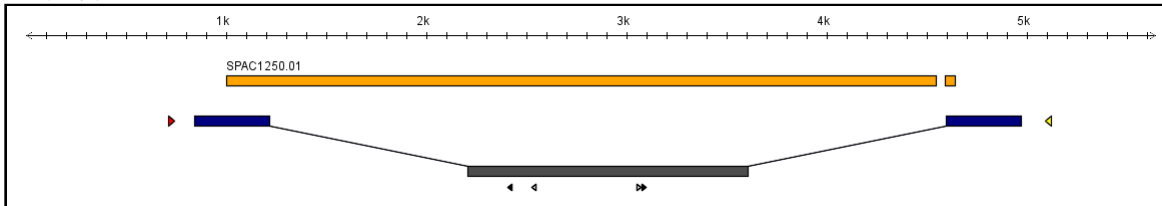

SPAC139.01c

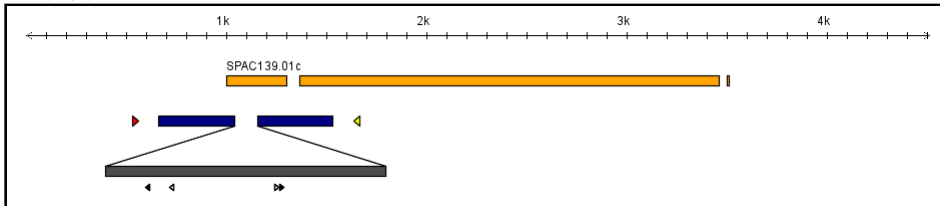

SPAC144.05

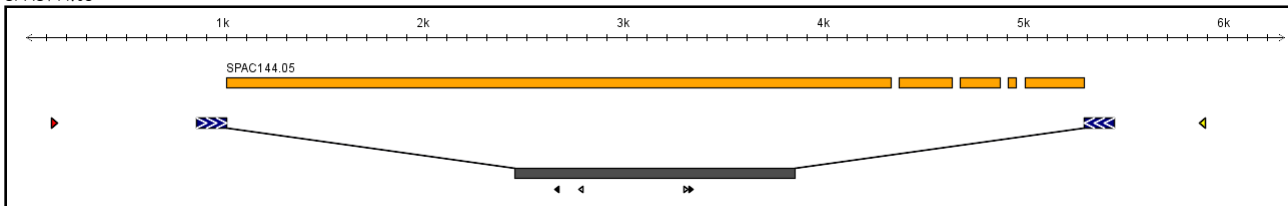

SPAC1486.03c

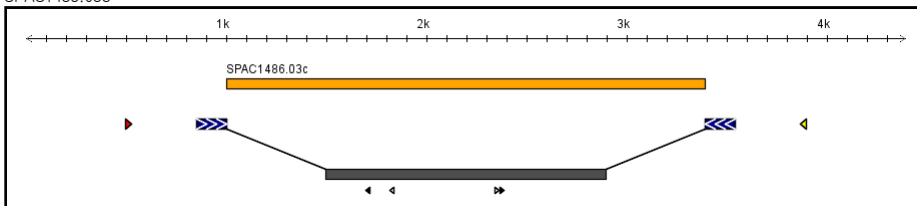

SPAC1486.04c

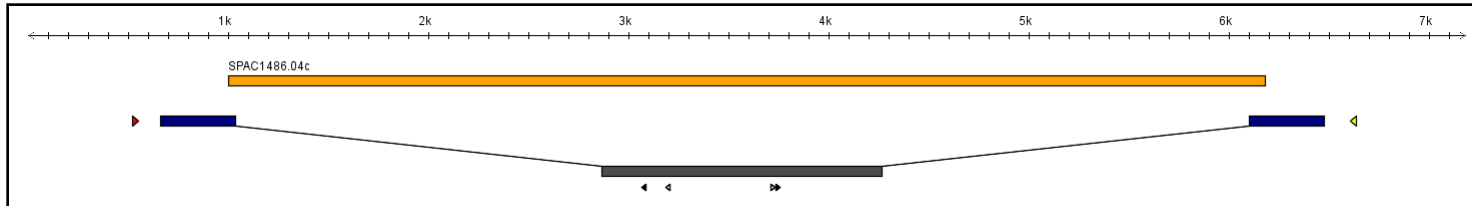

SPAC1486.05

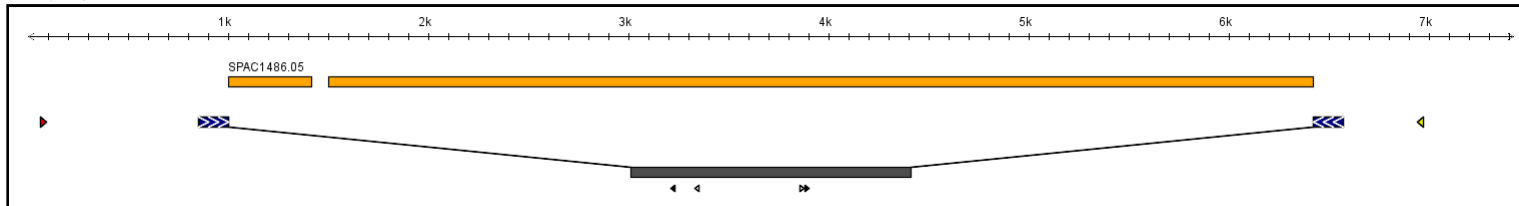

SPAC1527.01

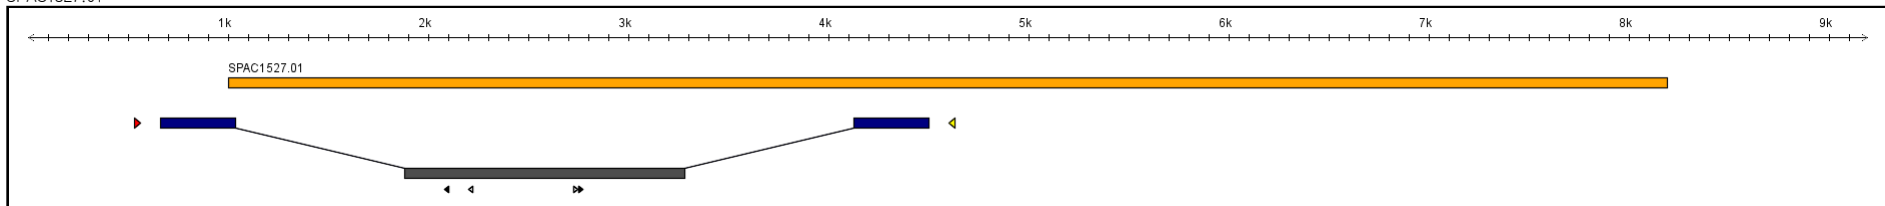

SPAC1565.07c

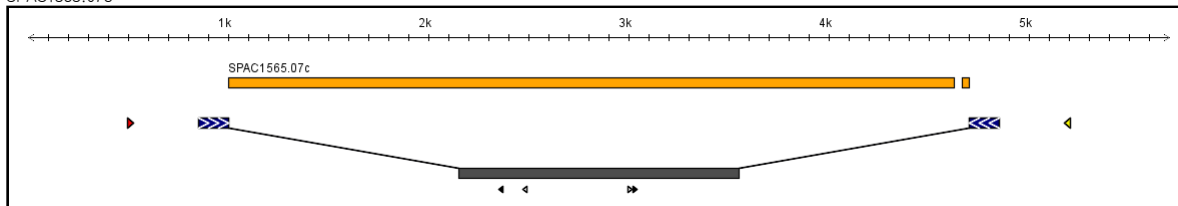

SPAC1610.03c

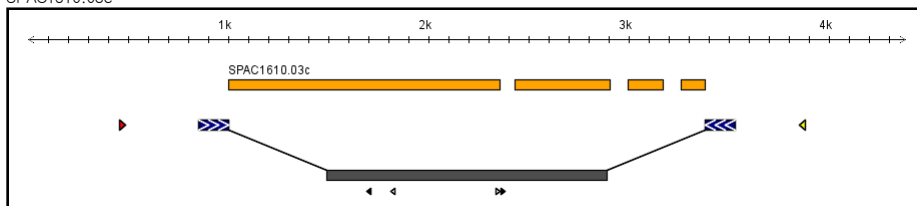

SPAC1639.02c

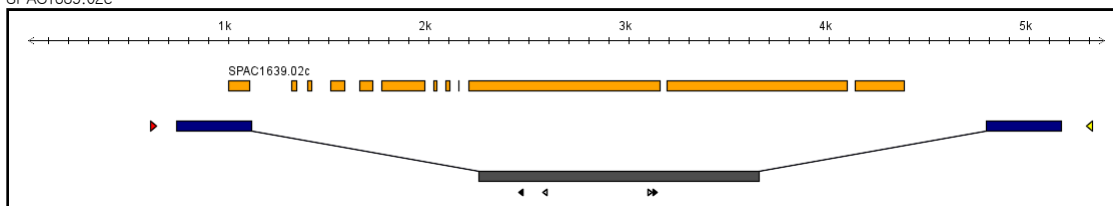



SPAC167.01

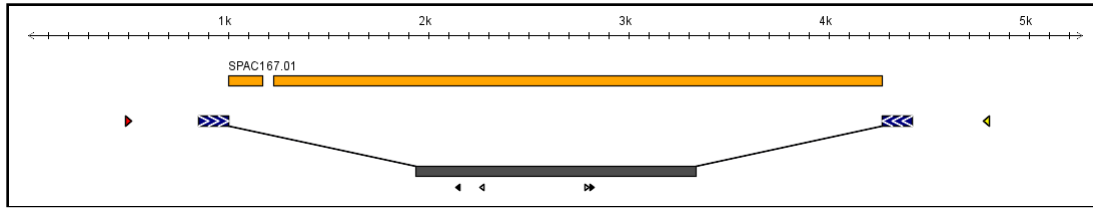

SPAC167.07c

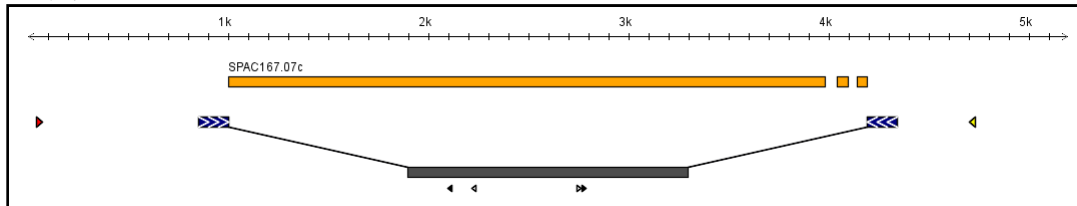

SPAC1687.05

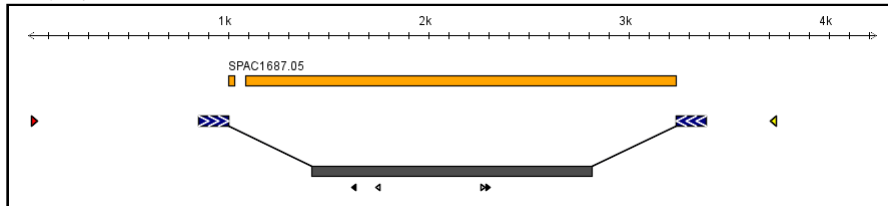

SPAC1687.09

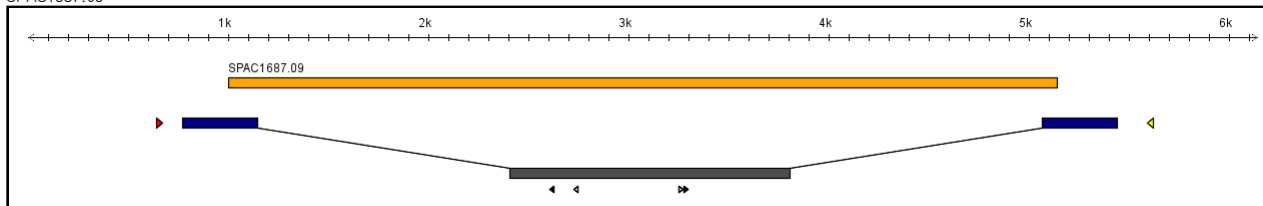

SPAC1782.01

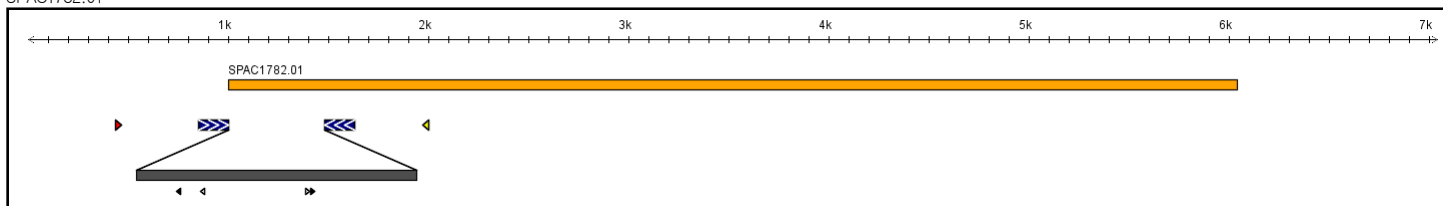

SPAC20H4.09

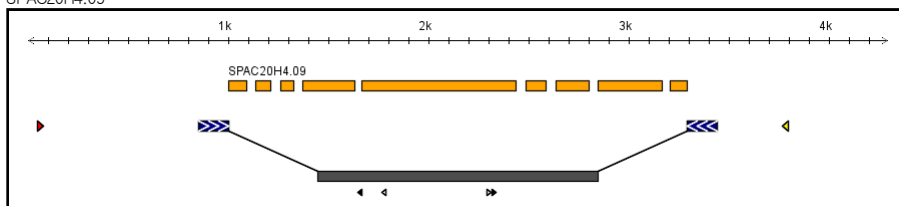

SPAC212.11

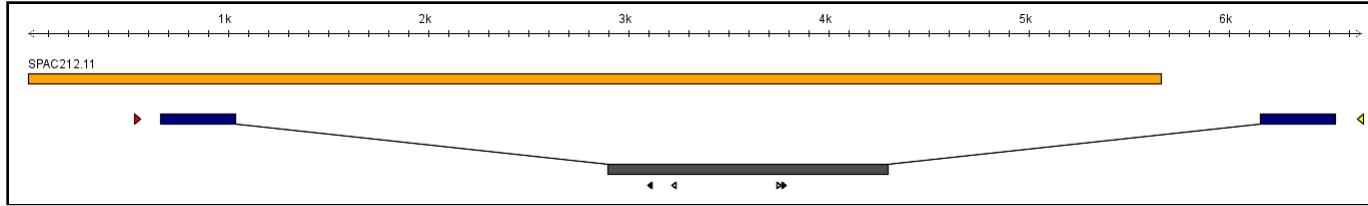

SPAC222.14c

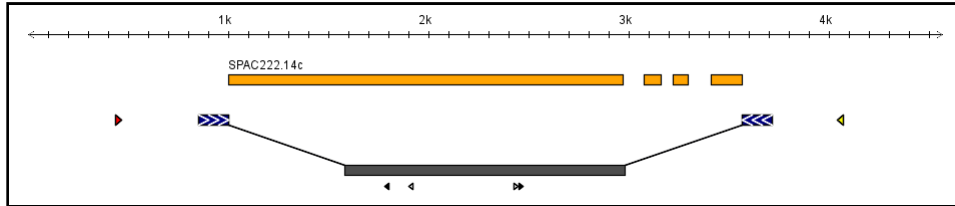

SPAC222.16c

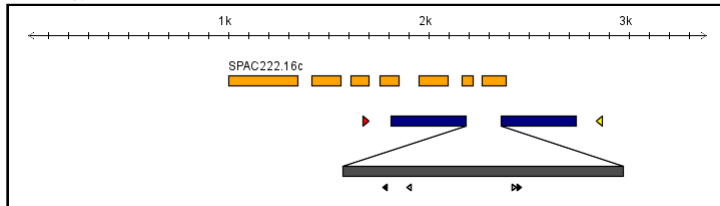

SPAC22A12.01c

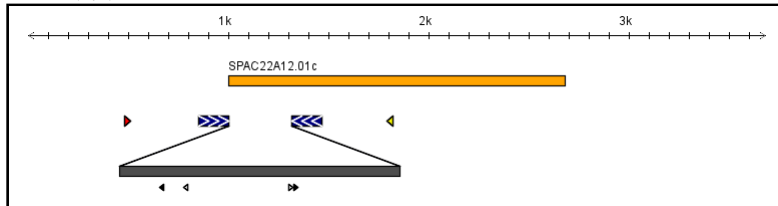

SPAC22E12.19

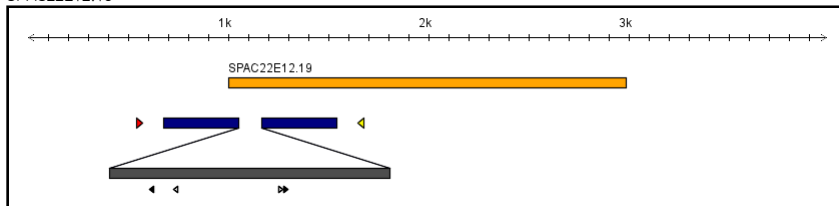

SPAC22F3.03c

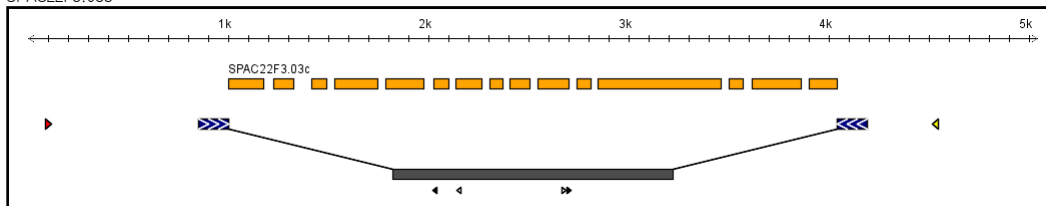

SPAC22F3.04

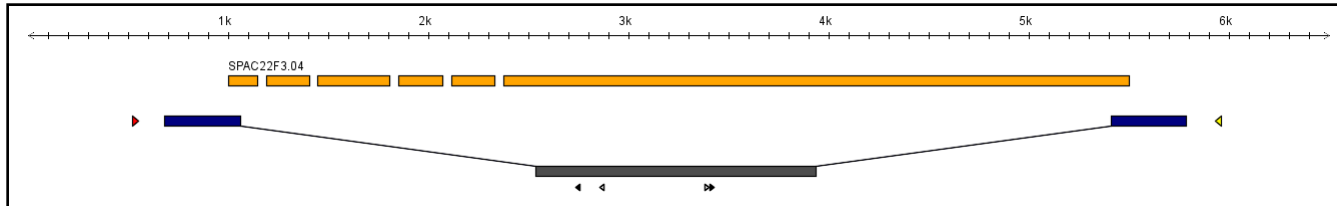

SPAC22F8.08

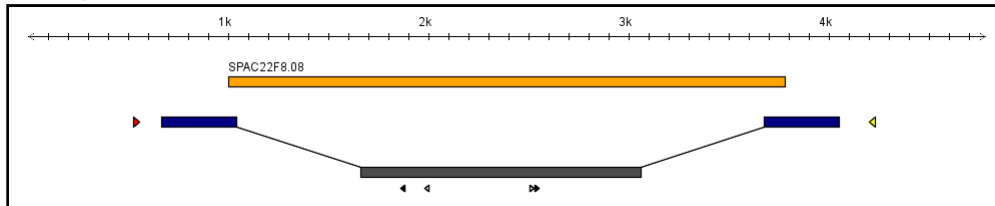

SPAC22G7.02

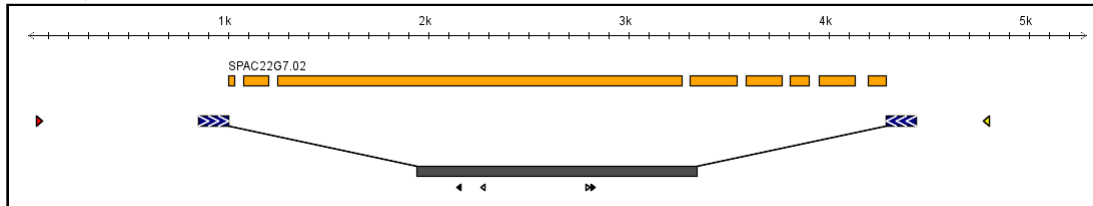

SPAC22G7.04

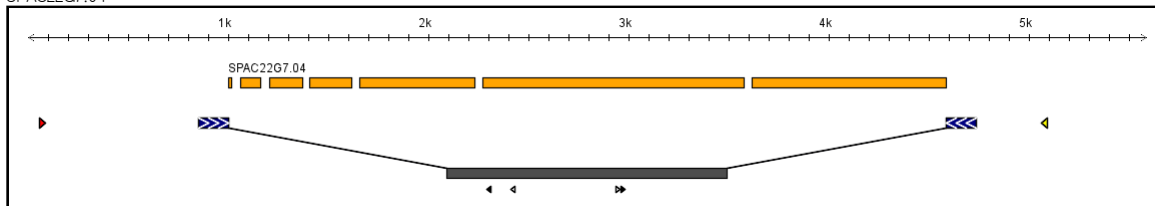

SPAC22G7.06c

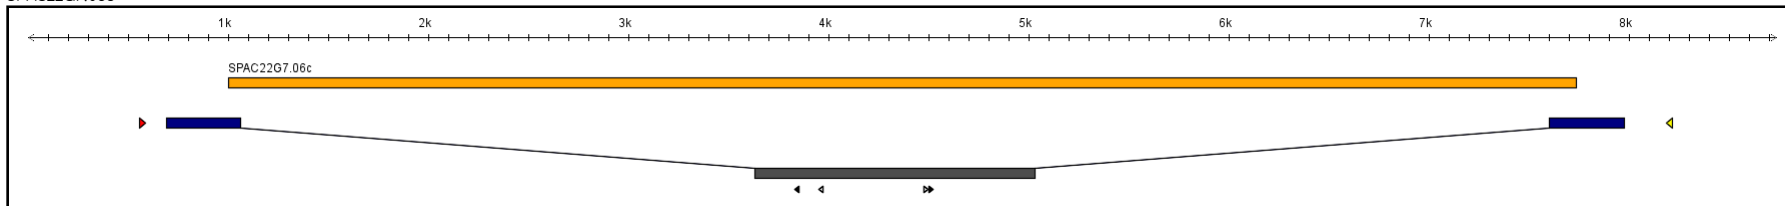

SPAC22G7.11c

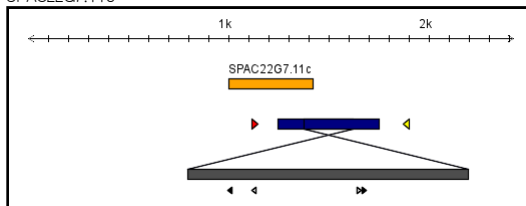

SPAC22H10.03c

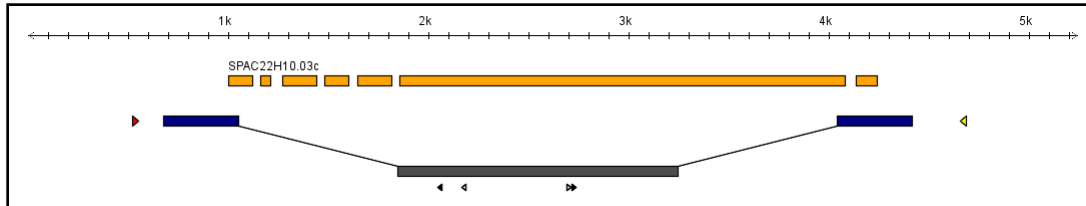

SPAC23A1.04c

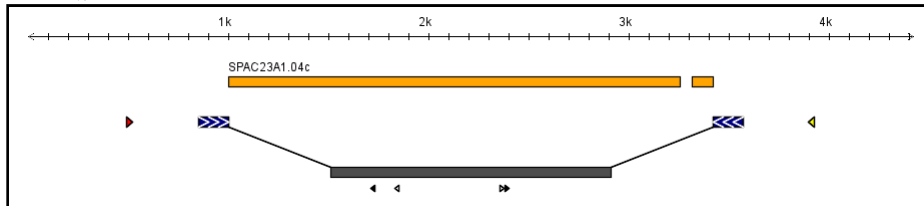

SPAC23A1.17

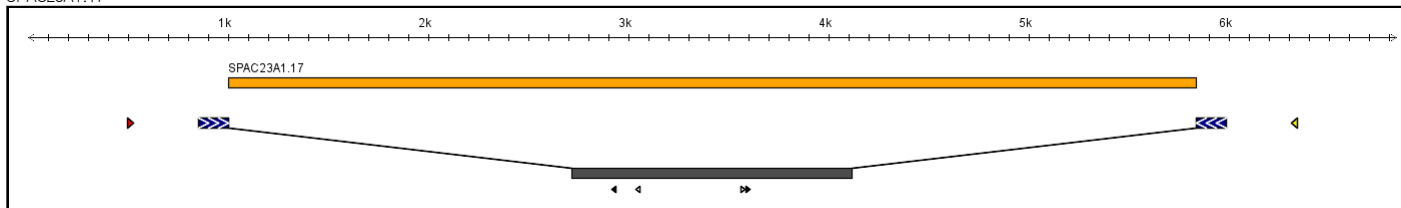

SPAC23C11.09

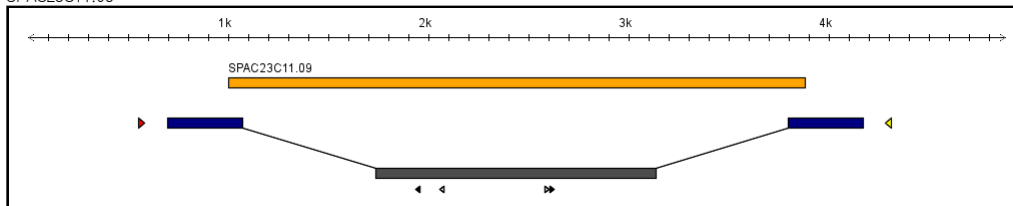

SPAC23C11.10

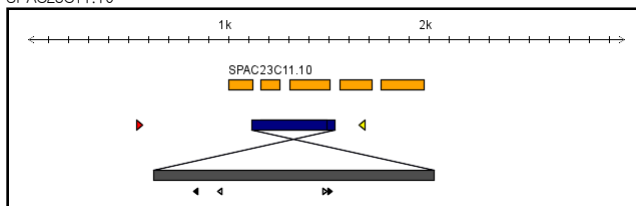

SPAC23C11.15

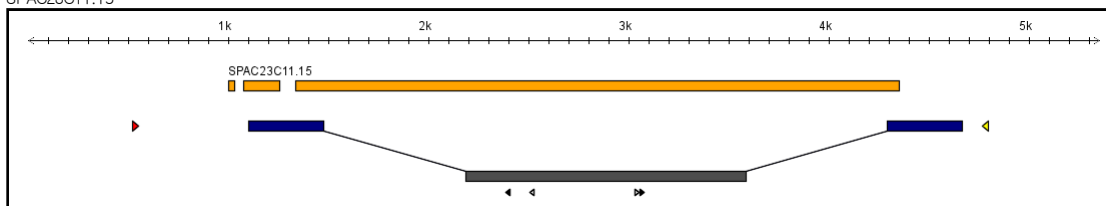

SPAC23D3.06c

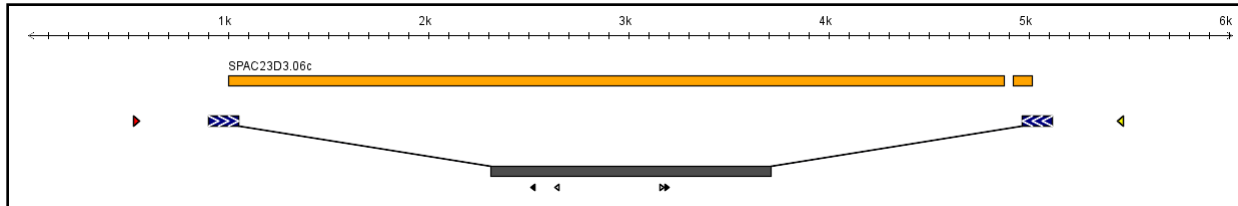

SPAC23D3.13c

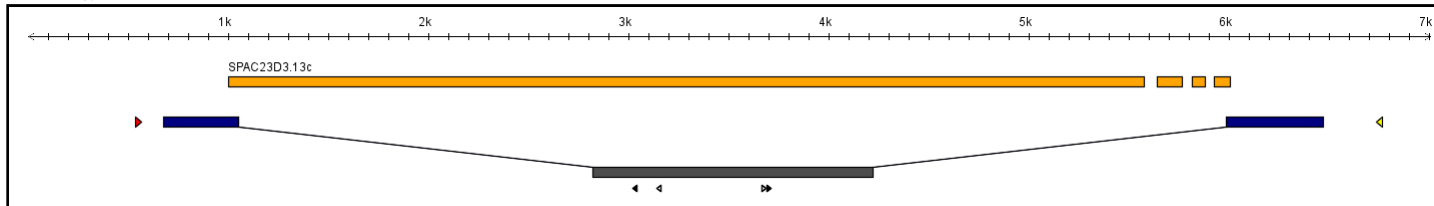

SPAC23E2.02

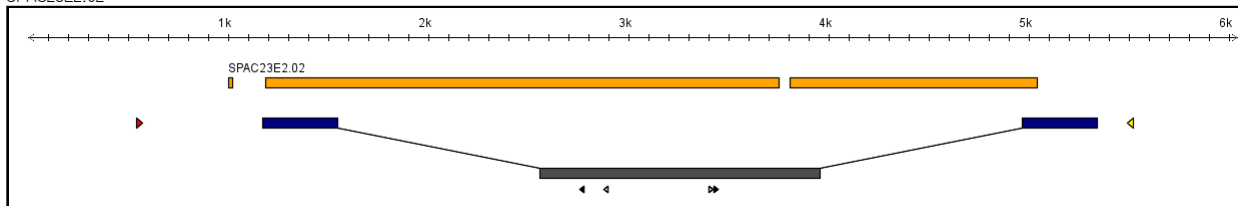

SPAC23G3.01

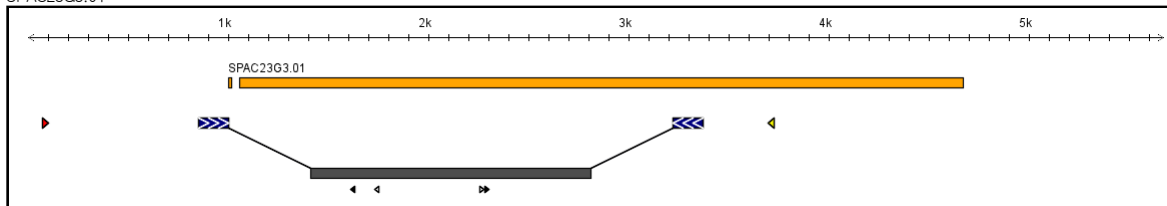

SPAC23G3.08c

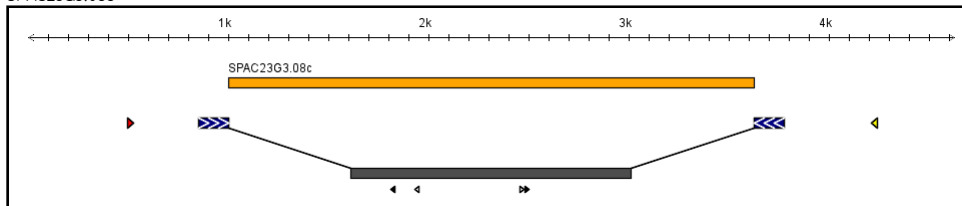

SPAC23H4.14

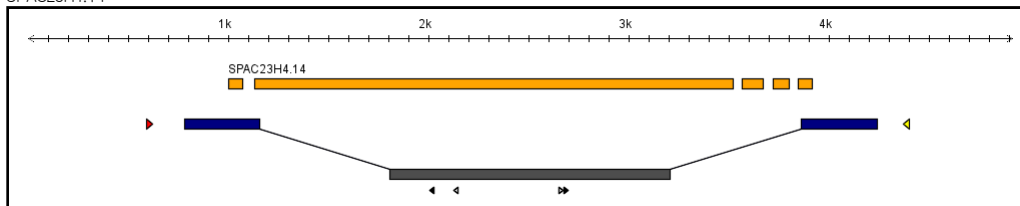

SPAC24B11.12c

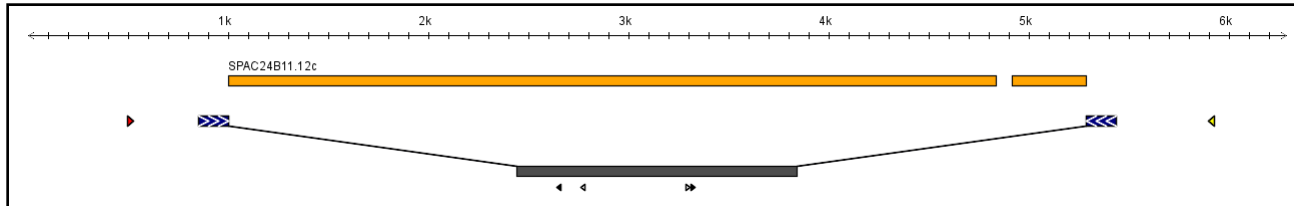

SPAC24B11.13

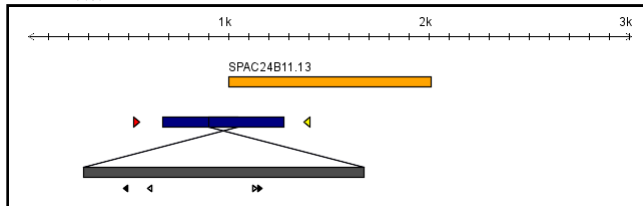

SPAC24C9.07c

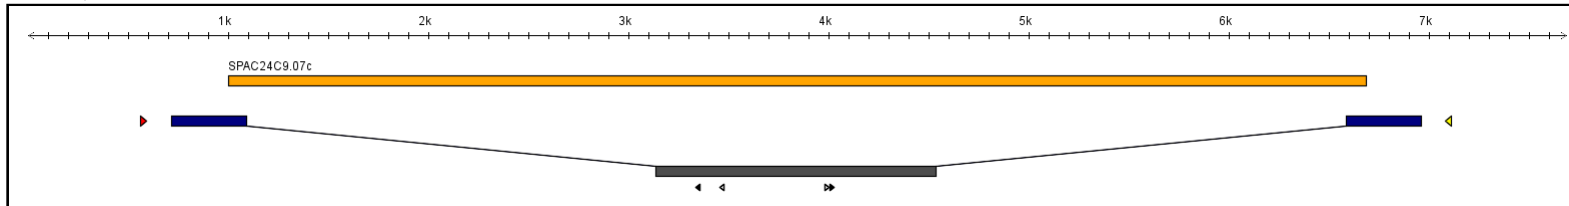

SPAC24C9.11

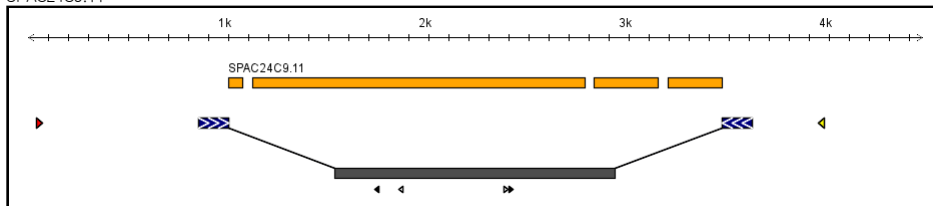

SPAC24H6.01c

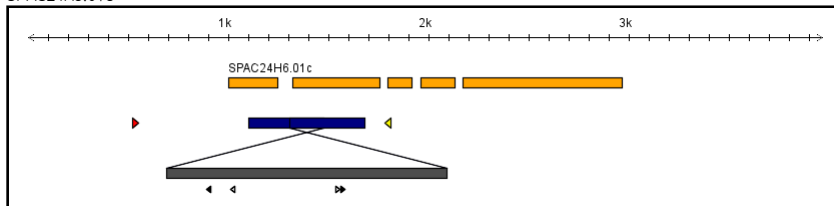

SPAC24H6.03

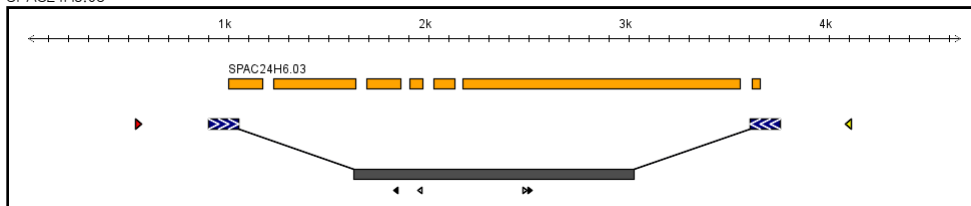

SPAC24H6.09

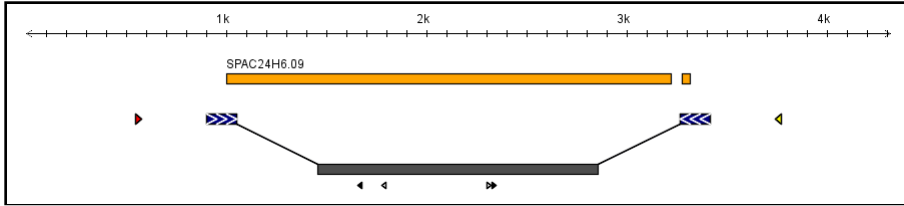

SPAC24H6.11c

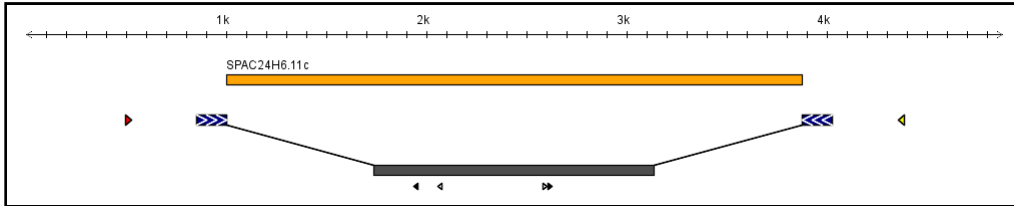

SPAC24H6.13

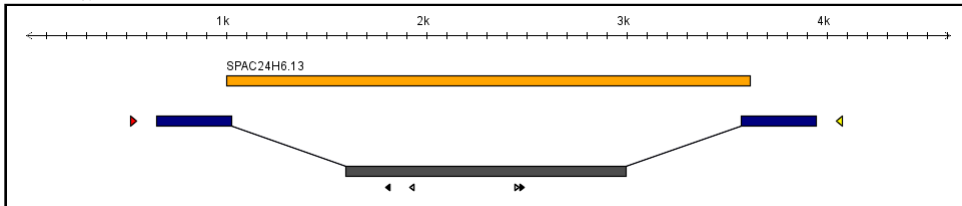

SPAC25A8.01c

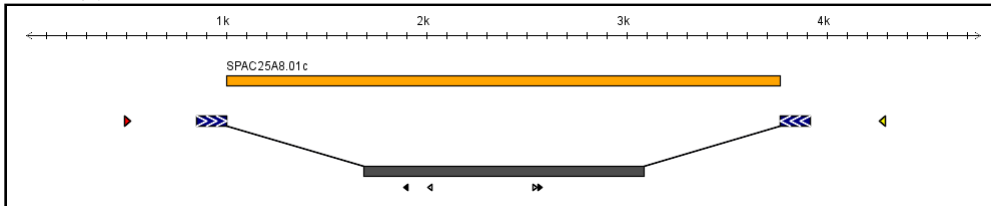

SPAC25G10.04c

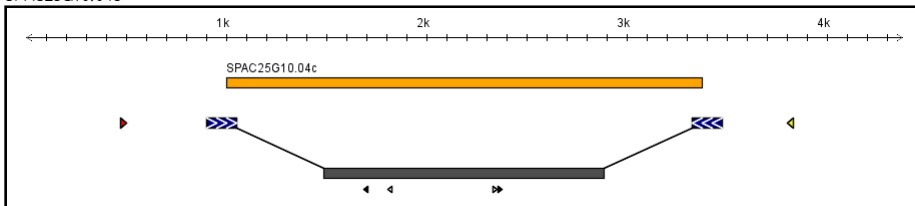

SPAC25G10.07c

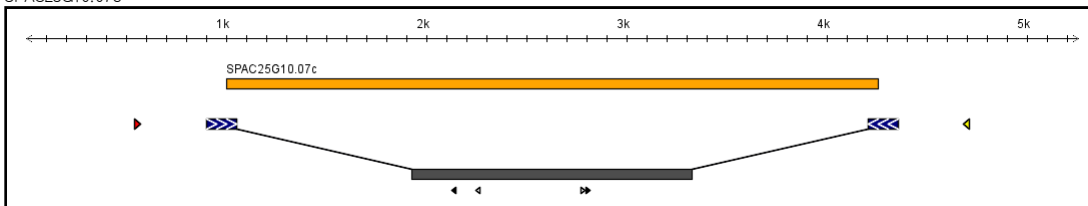

SPAC25G10.08

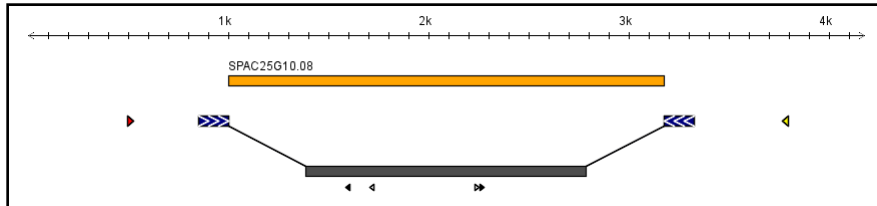

SPAC25G10.09c

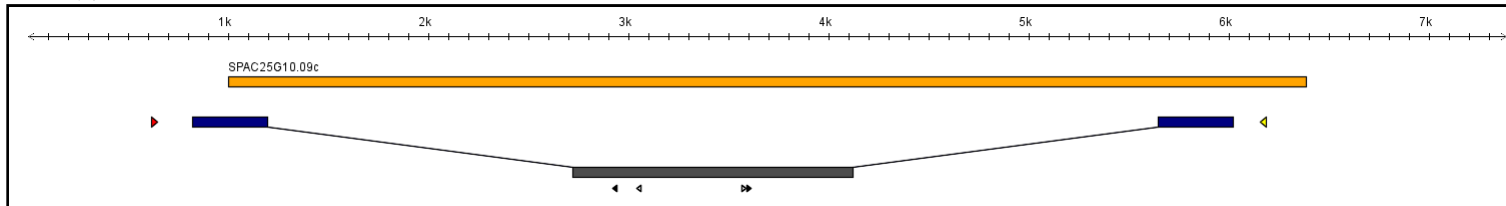

SPAC25H1.07

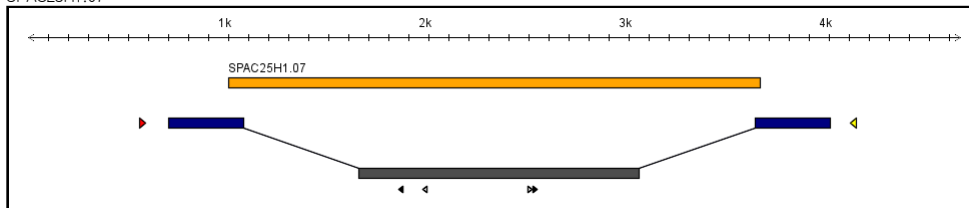

SPAC26A3.05

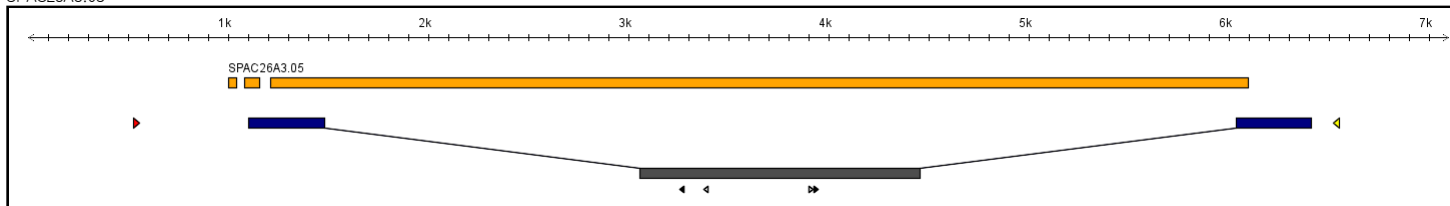

SPAC26A3.09c

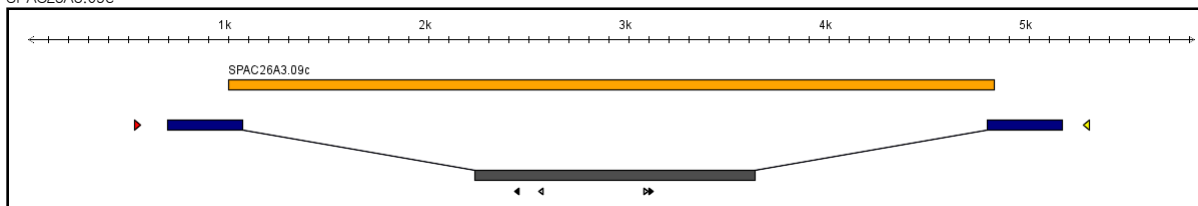

SPAC26A3.12c

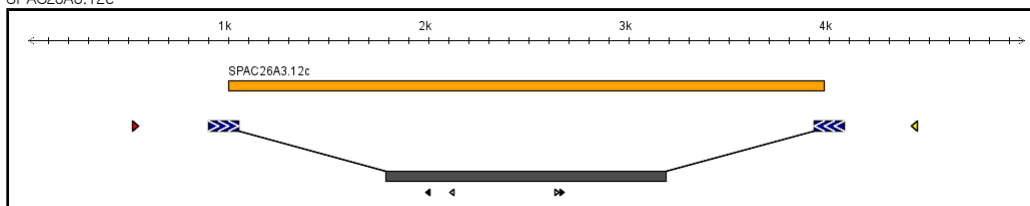



SPAC26A3.17c

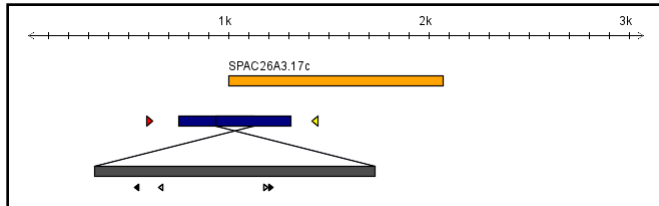

SPAC26F1.08c

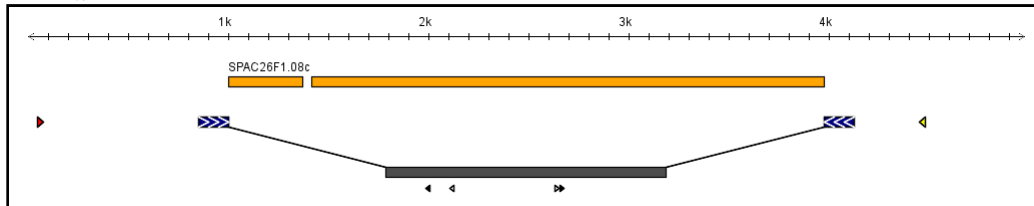

SPAC26F1.09

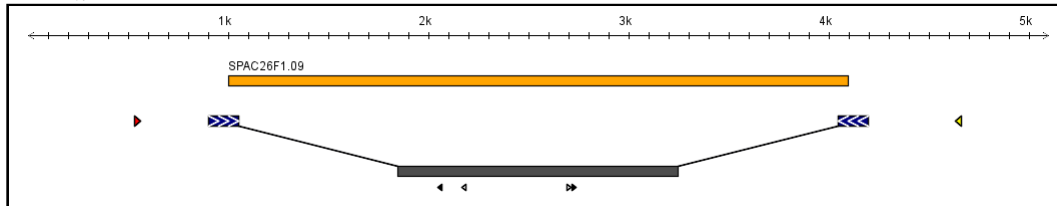

SPAC26H5.05

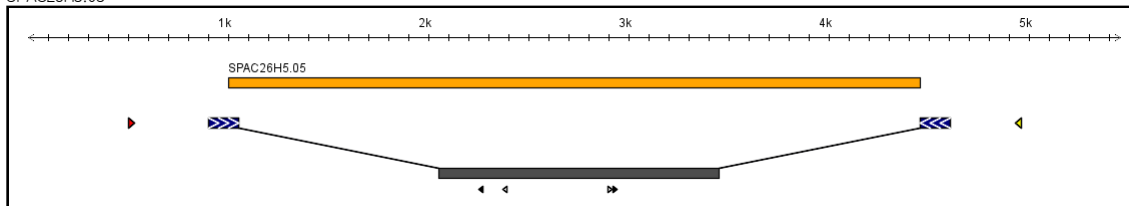

SPAC26H5.12

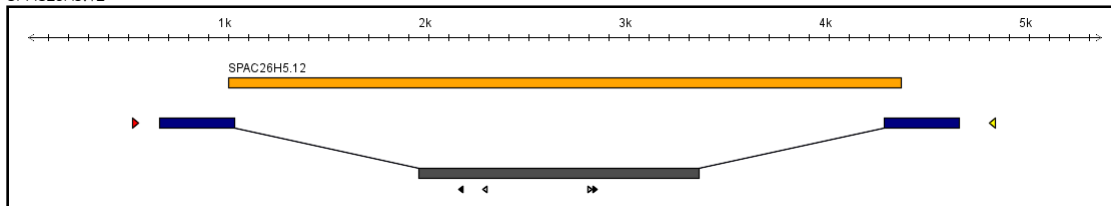

SPAC27D7.14c

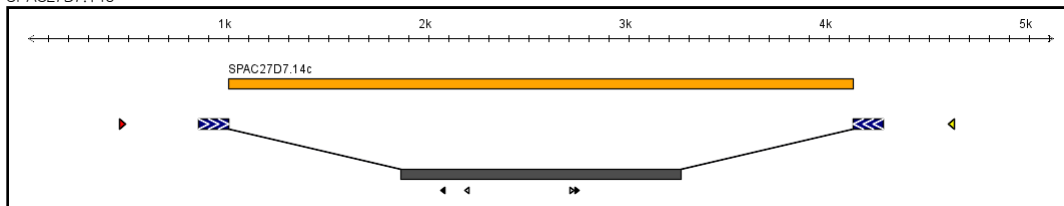

SPAC29A4.11

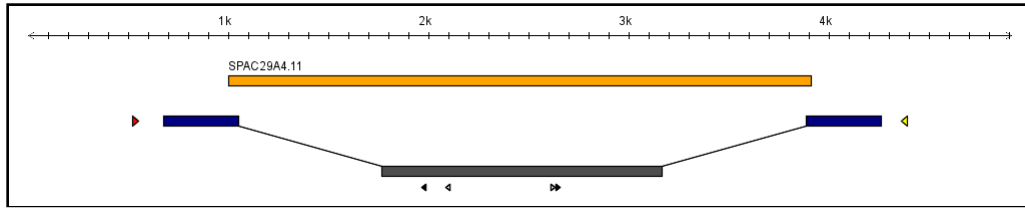

SPAC29A4.19c

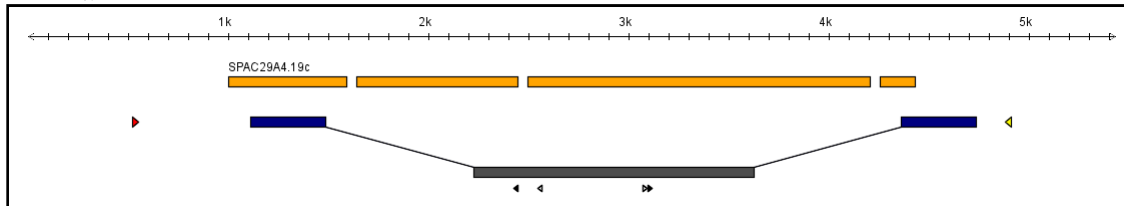

SPAC29B12.01

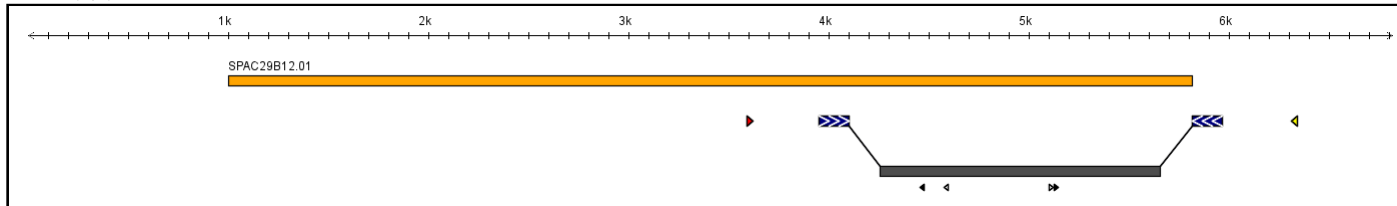

SPAC29B12.07

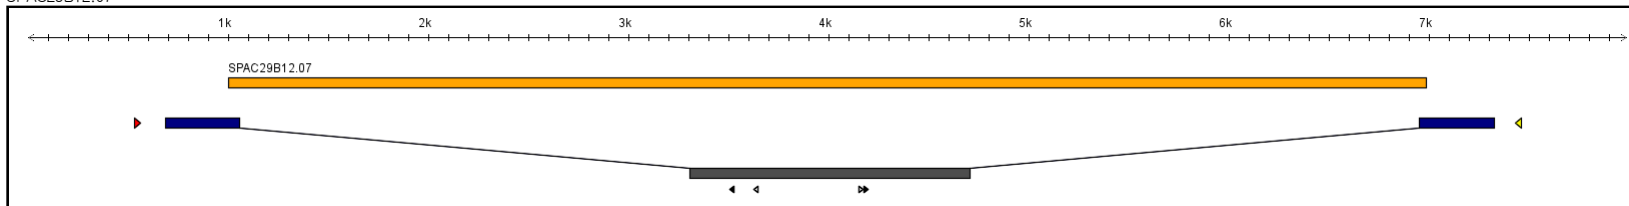

SPAC29E6.03c

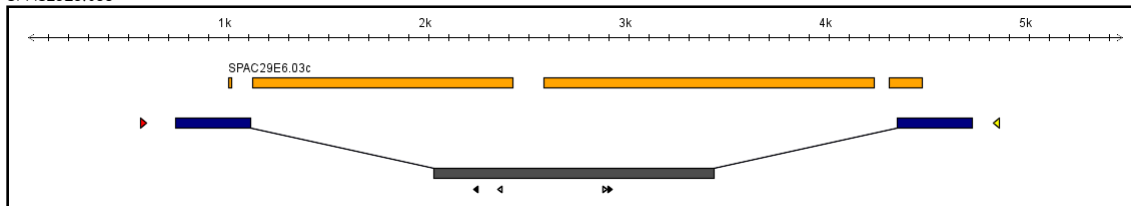

SPAC29E6.10c

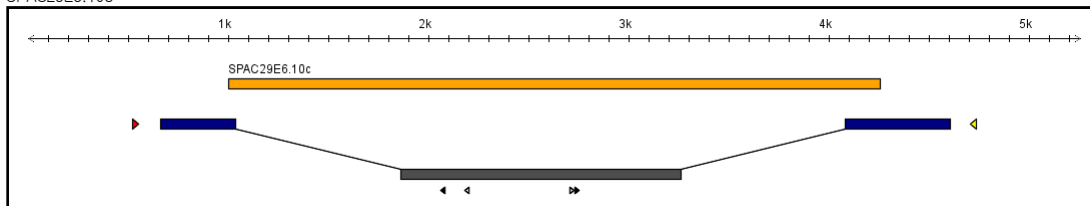

SPAC30.01c

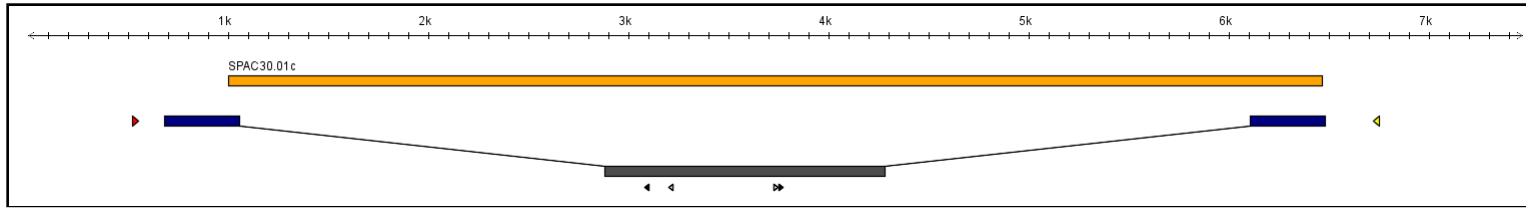

SPAC30.04c

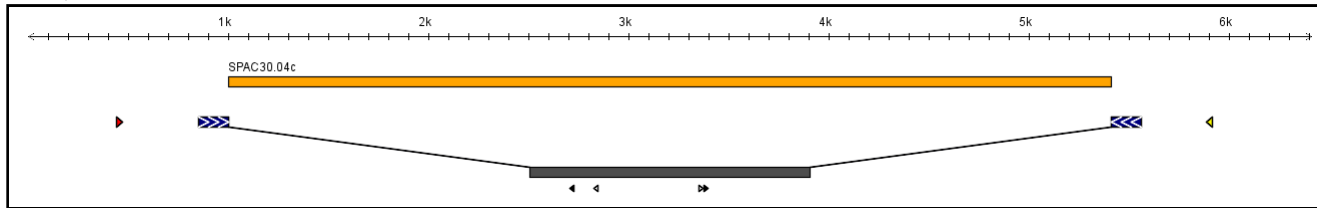

SPAC30D11.03

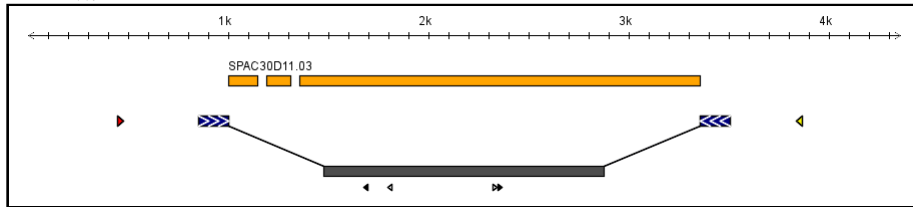

SPAC31A2.05c

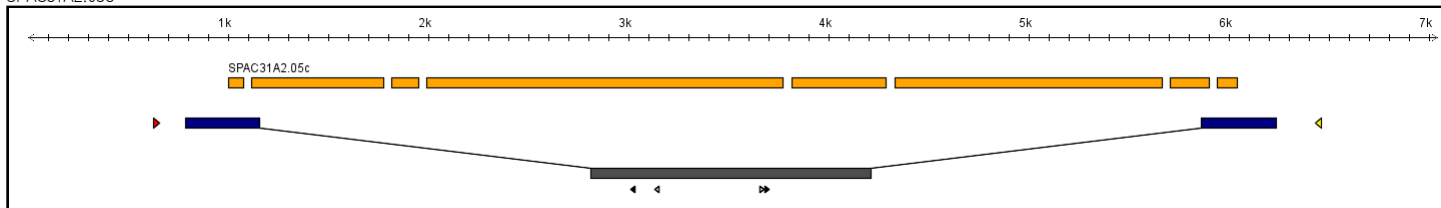

SPAC31A2.07c

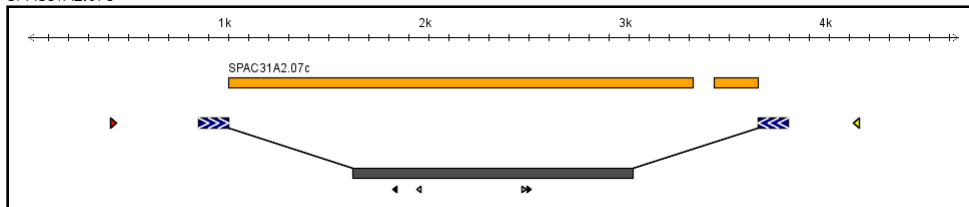

SPAC31A2.16

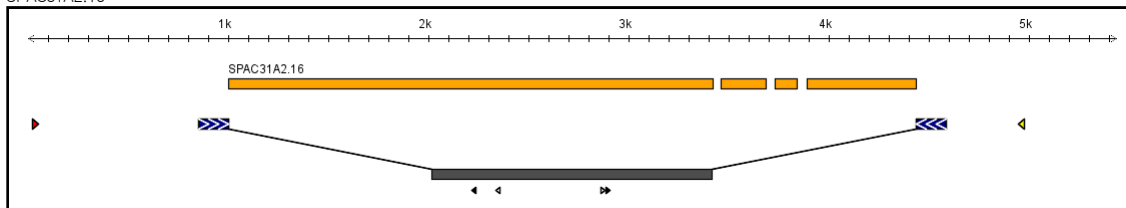

SPAC31G5.01

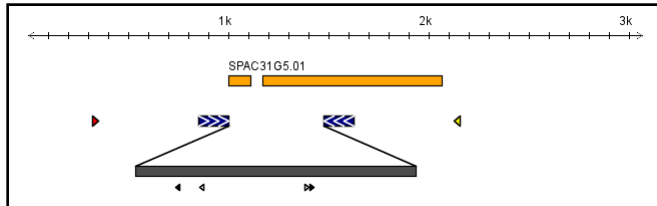

SPAC31G5.15

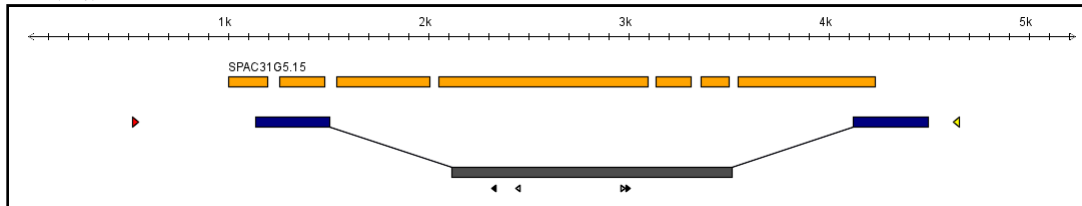

SPAC31G5.19

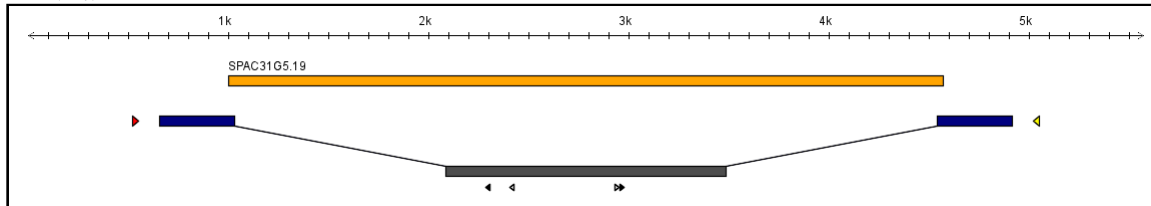

SPAC328.04

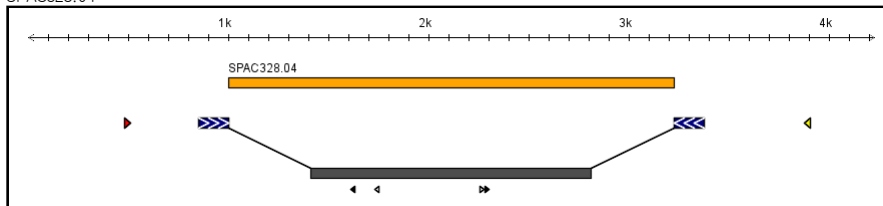

SPAC328.06

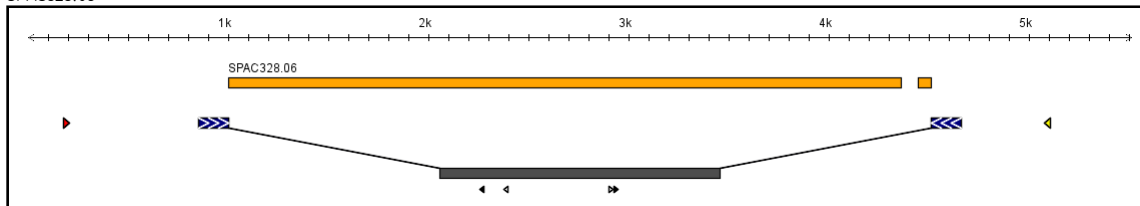

SPAC32A11.03c

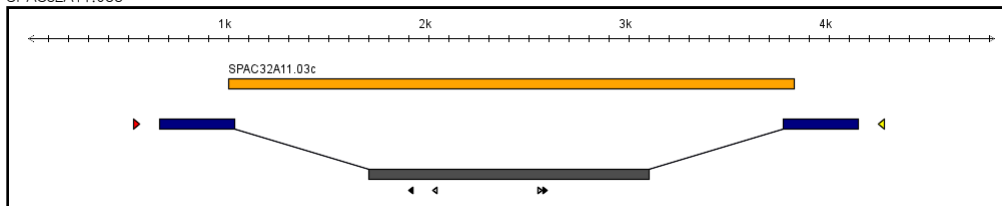

SPAC343.11c

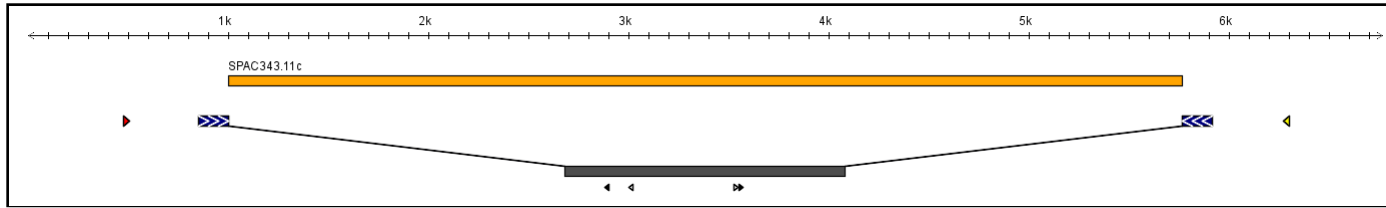

SPAC458.03

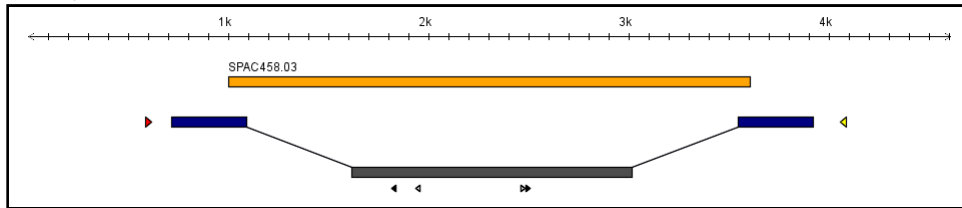

SPAC458.07

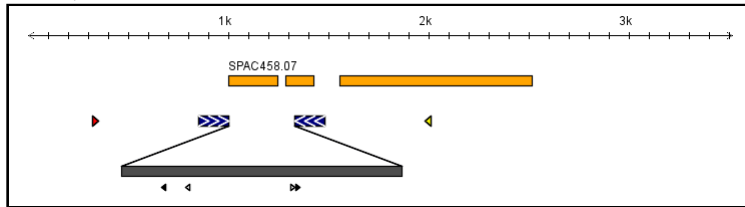

SPAC513.05

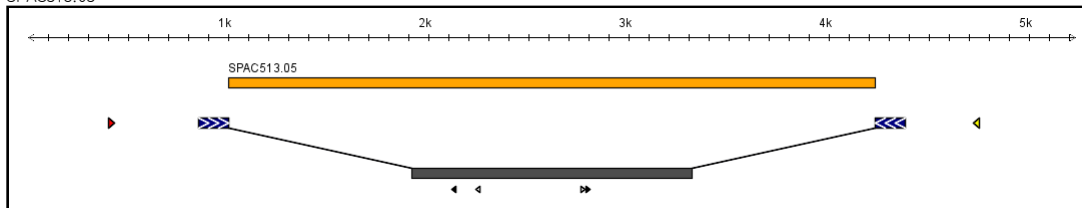

SPAC521.04c

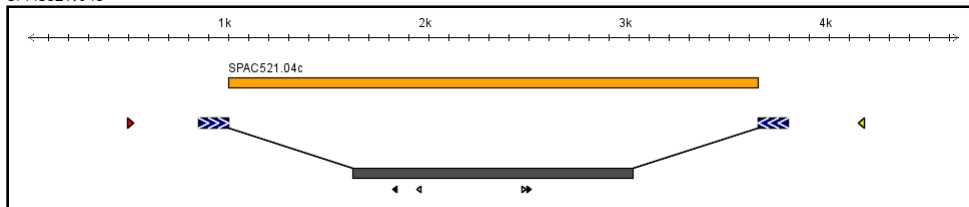

SPAC56F8.02

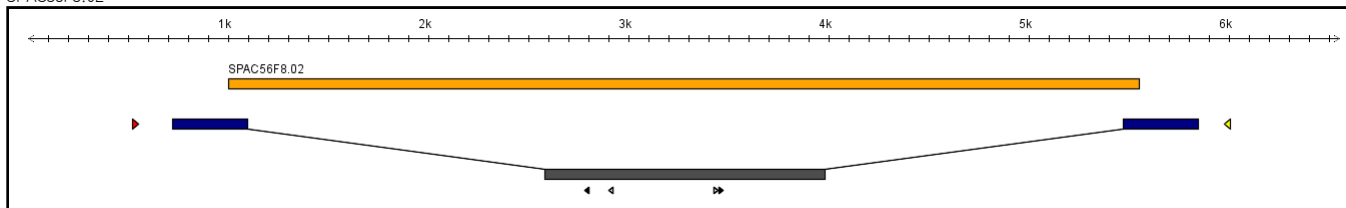

SPAC57A10.02

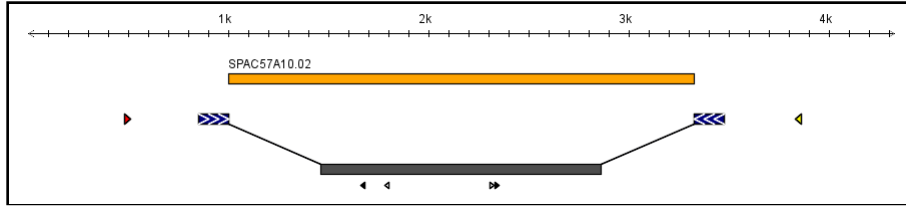

SPAC57A7.05

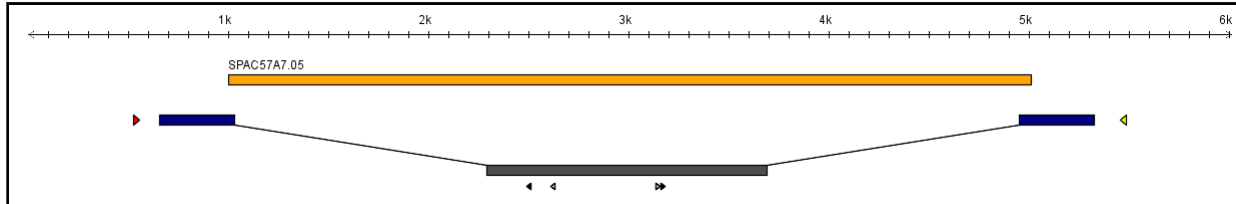

SPAC57A7.06

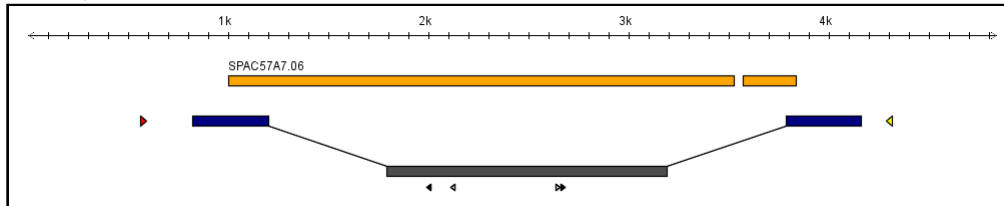

SPAC57A7.11

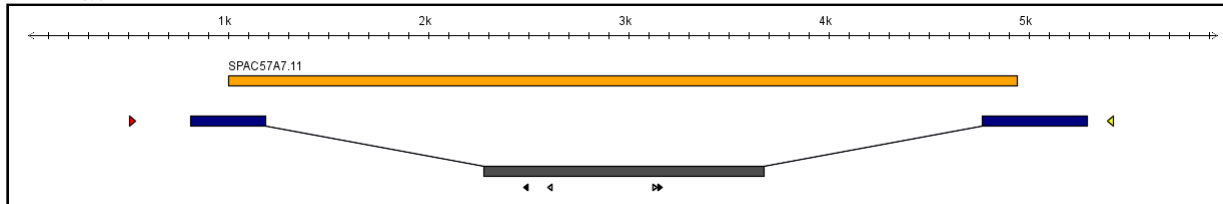

SPAC589.02c

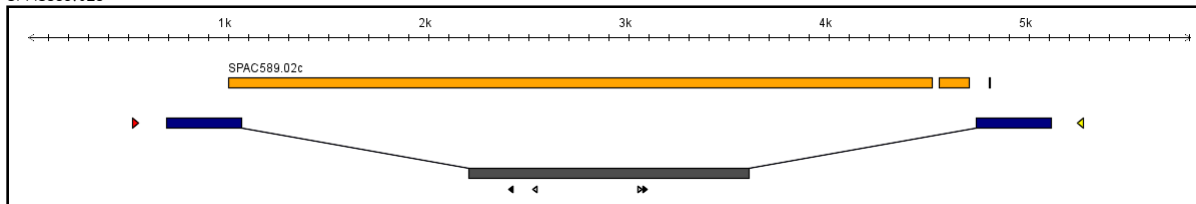

SPAC607.10

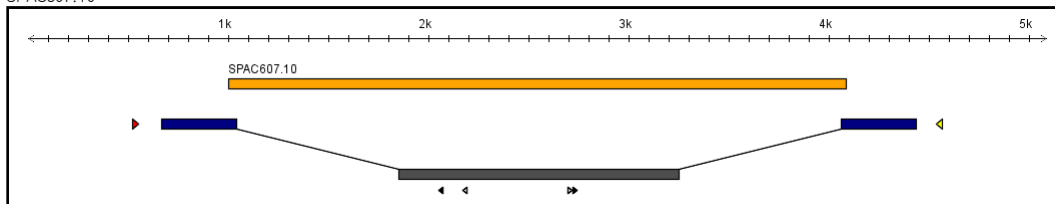

SPAC630.05

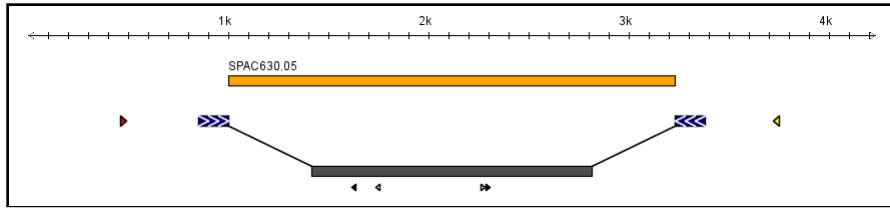

SPAC630.13c

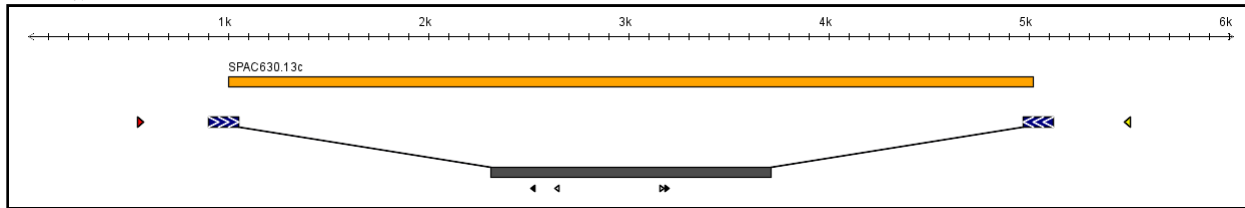

SPAC644.12

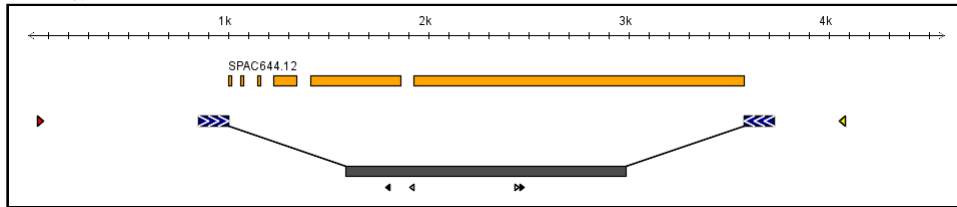

SPAC664.15

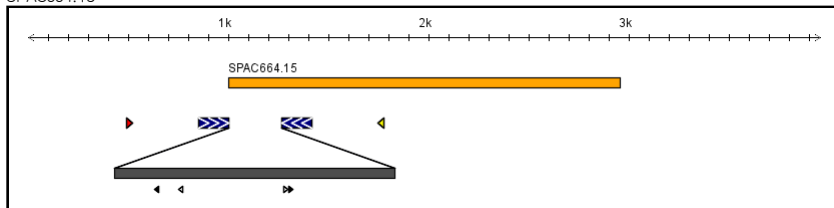

SPAC688.07c

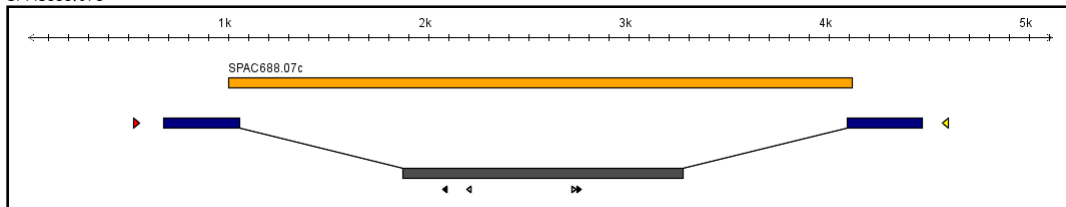

SPAC688.10

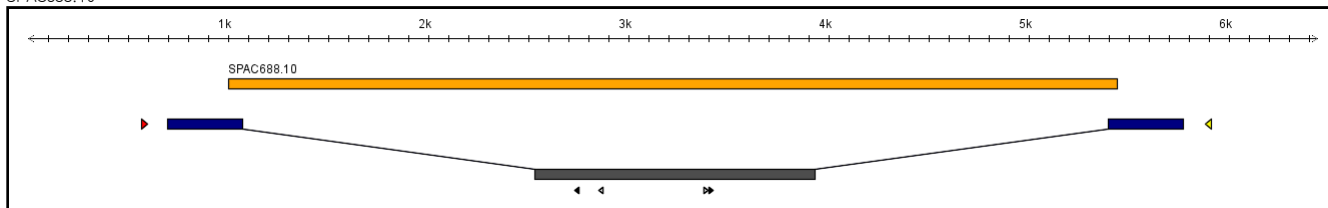

SPAC688.11

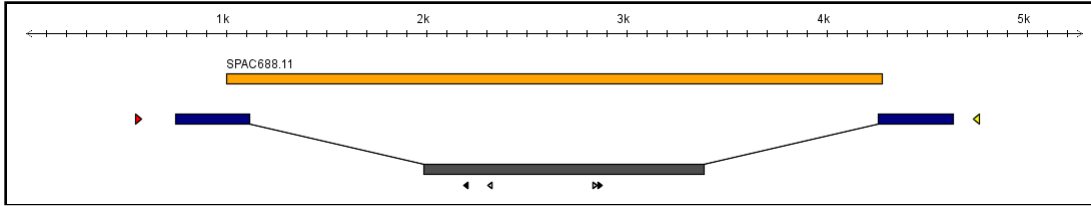

SPAC694.02

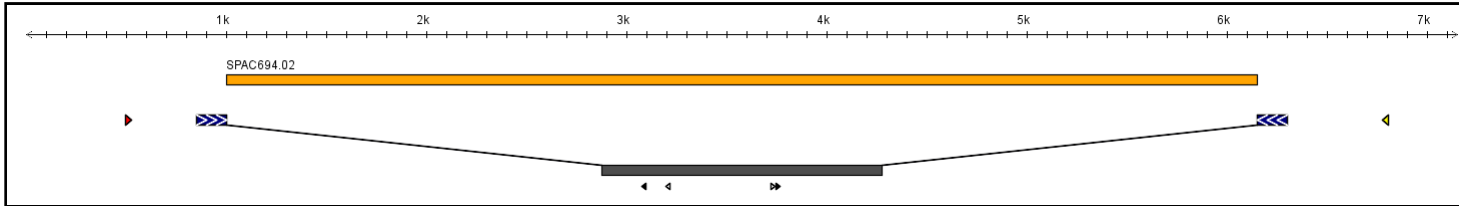

SPAC821.09

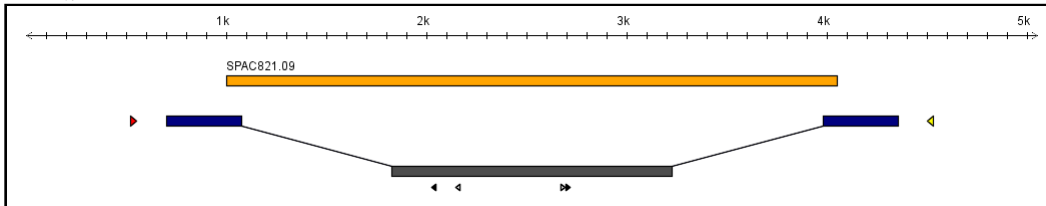

SPAC821.13c

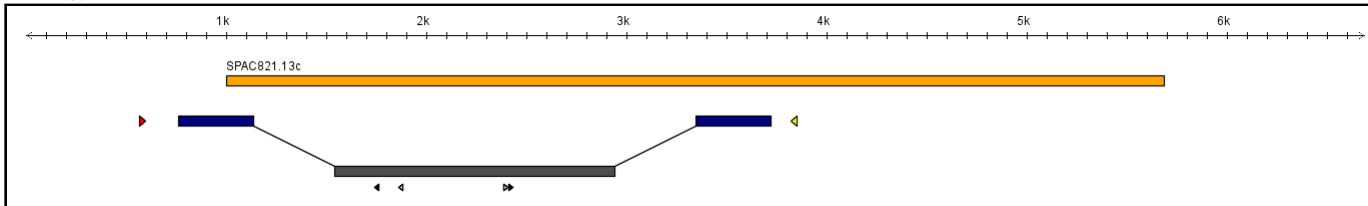

SPAC824.02

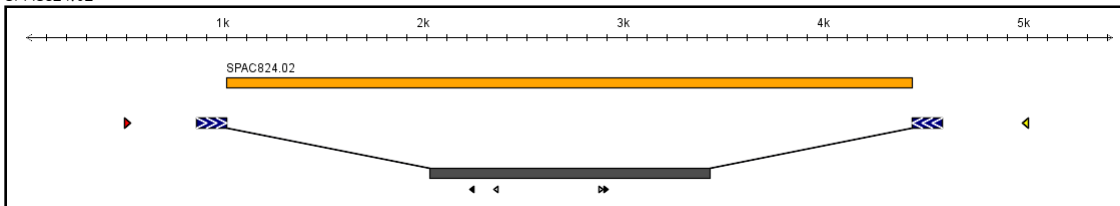

SPAC890.06

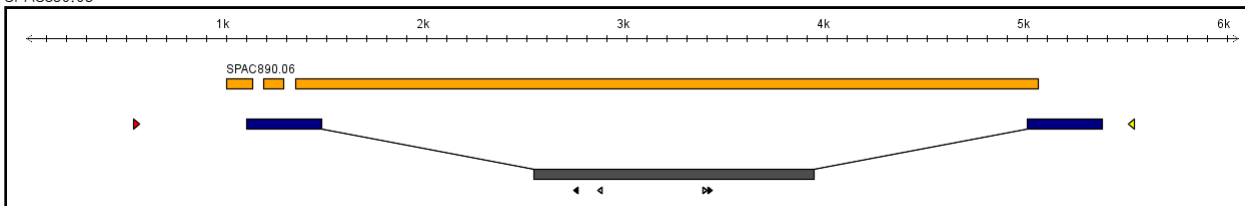



SPAC926.09c

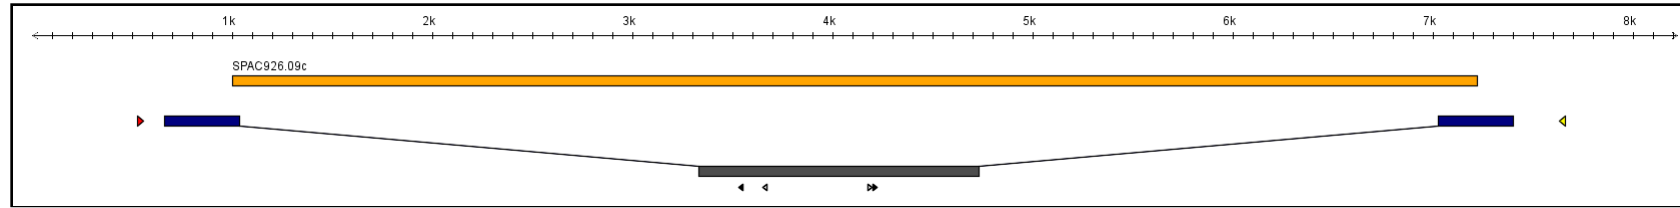

# SPAC27E2.09

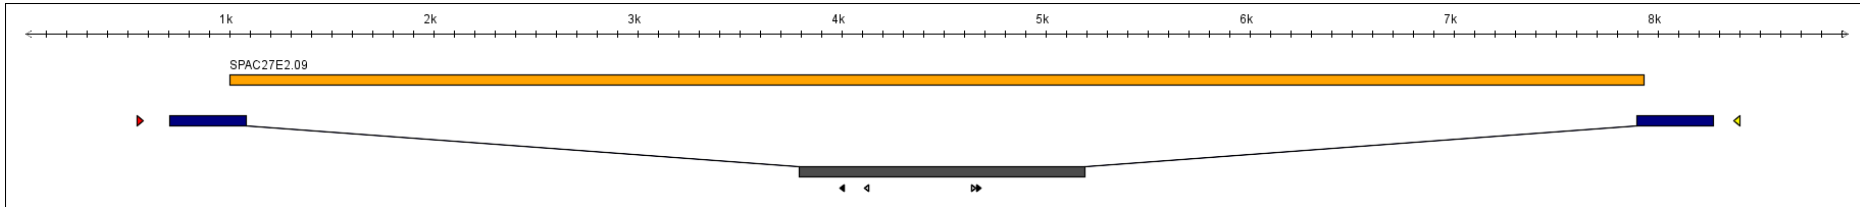

# SPAC1093.06c

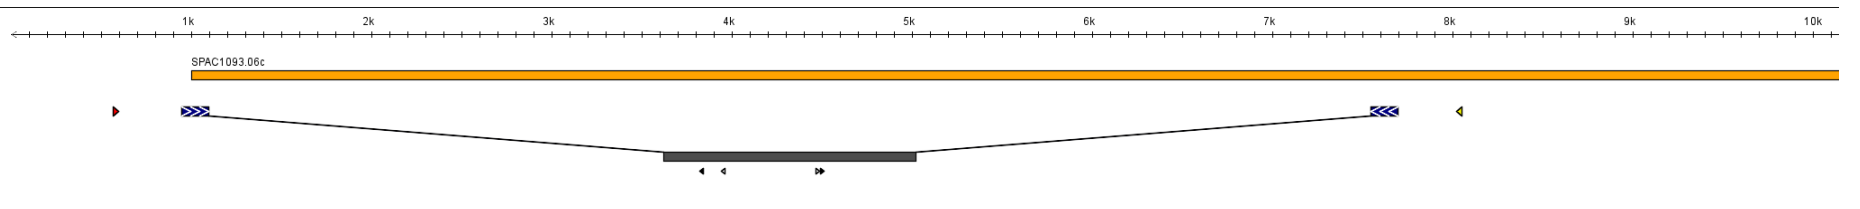

# SPAC56E4.04c

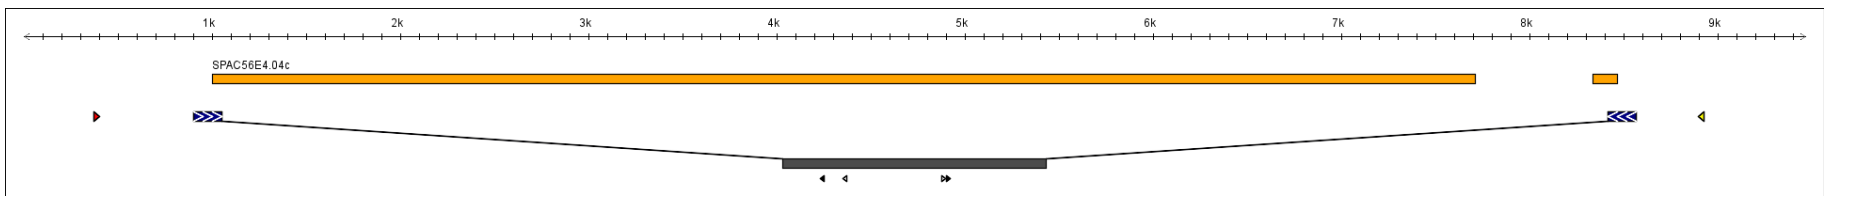

# SPAC23G3.02c

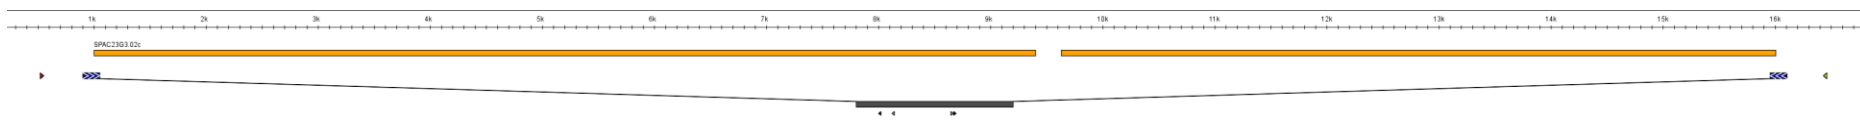

SPAC1782.06c

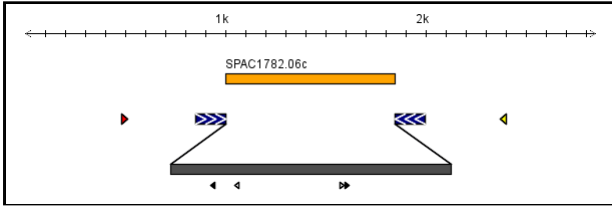

SPAC1782.07

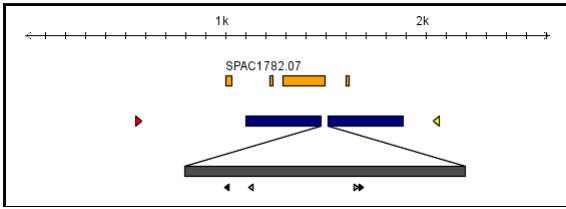

SPAC1782.08c

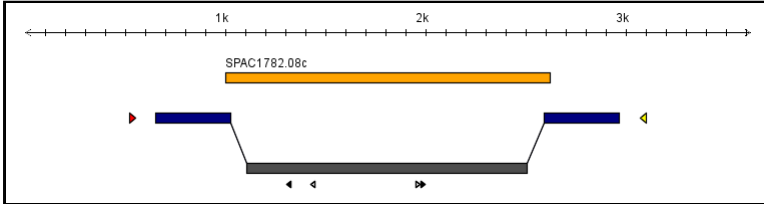

SPAC1782.09c

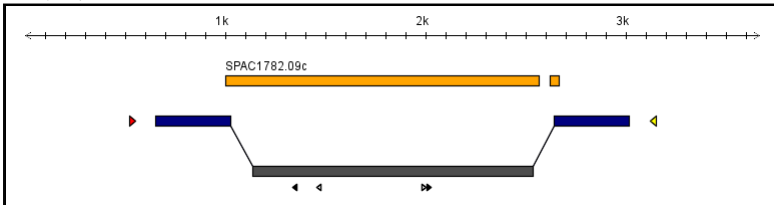

SPAC1782.10c

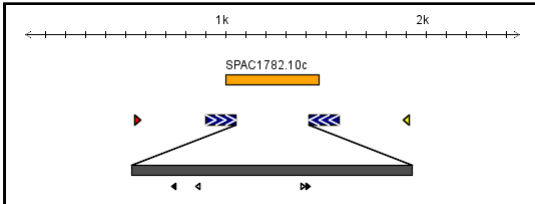

SPAC1782.11

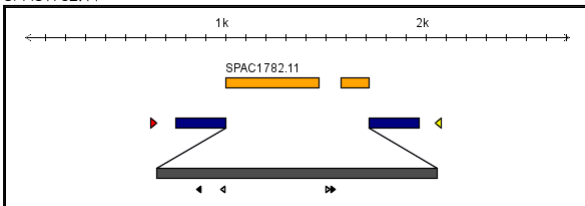

SPAC1782.12c

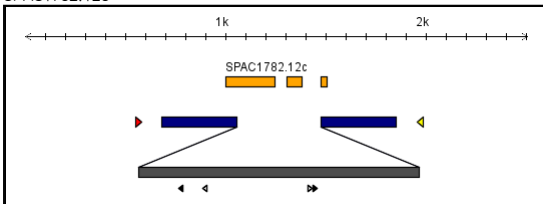

SPAC1783.01

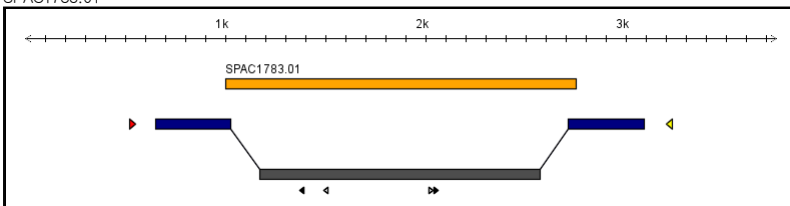

SPAC1783.02c

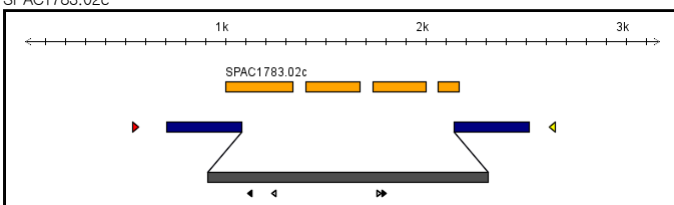

SPAC1783.03

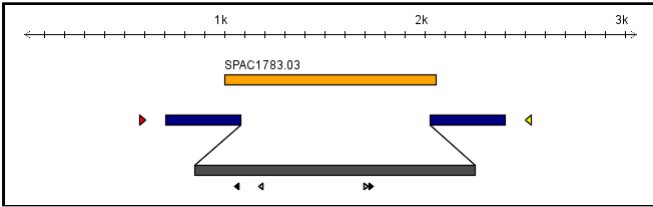

SPAC1783.04c

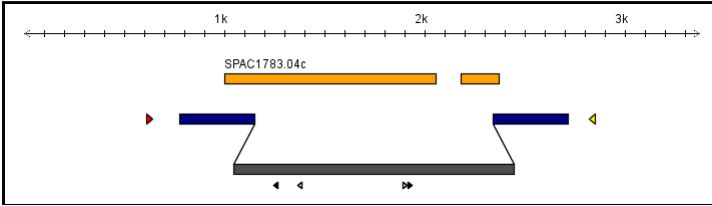

SPAC1783.06c

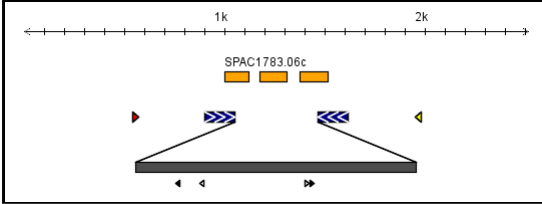

SPAC1783.07c

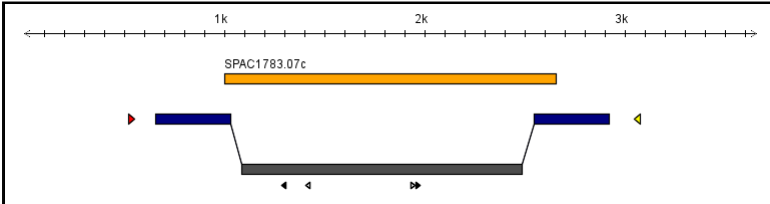

SPAC1783.08c

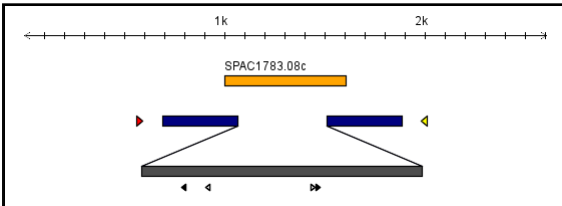

SPAC1786.01c

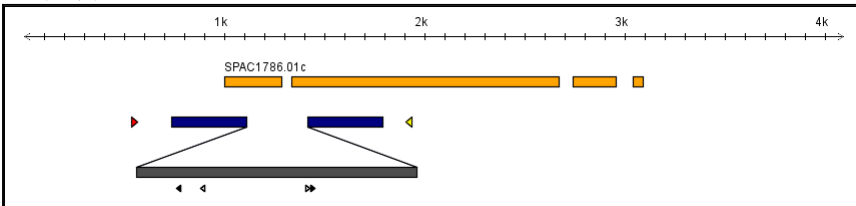

SPAC1786.02

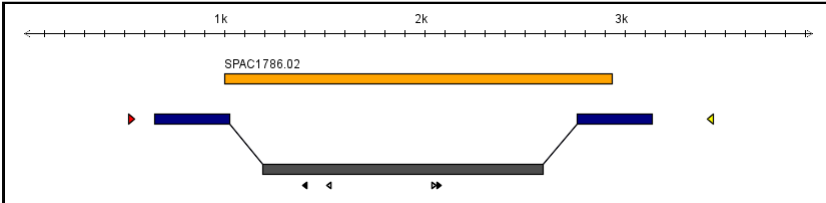

SPAC1786.04

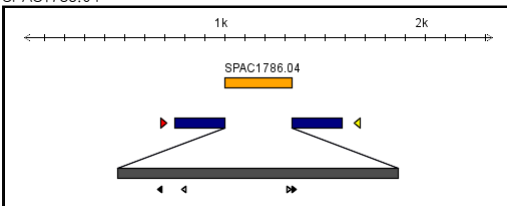

SPAC1805.01c

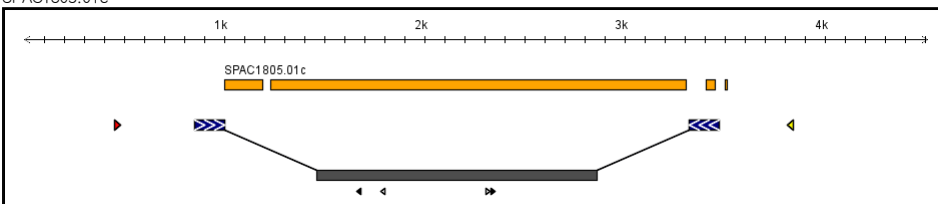

SPAC1805.02c

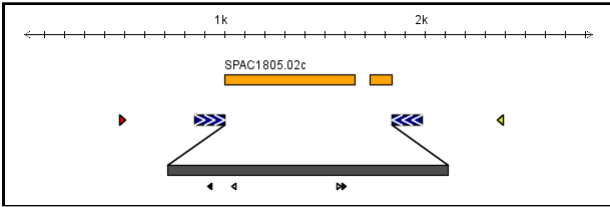

SPAC1805.03c

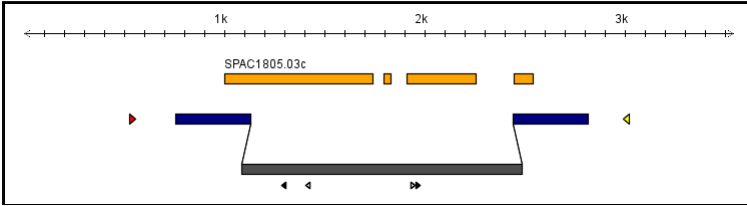

SPAC1805.04

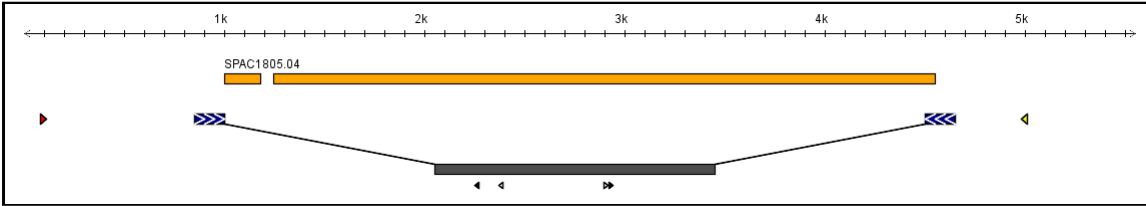

SPAC1805.05

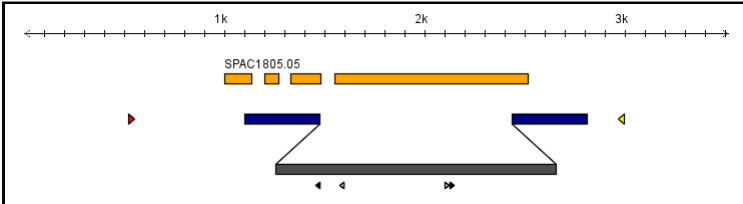

SPAC1805.06c

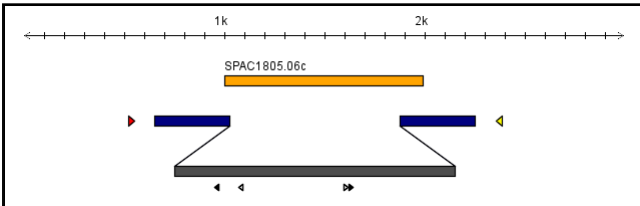

SPAC1805.07c

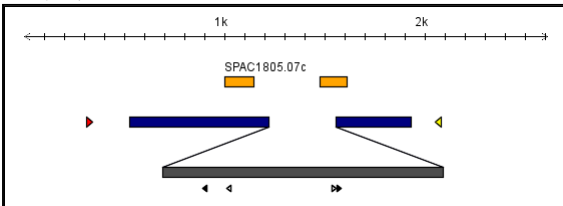

SPAC1805.08

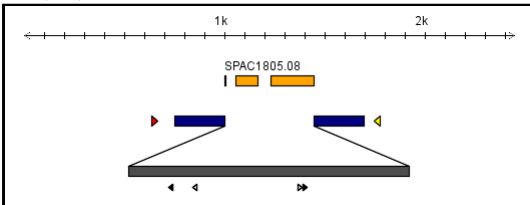

SPAC1805.09c

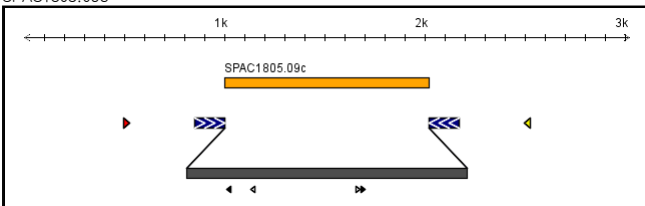

SPAC1805.10

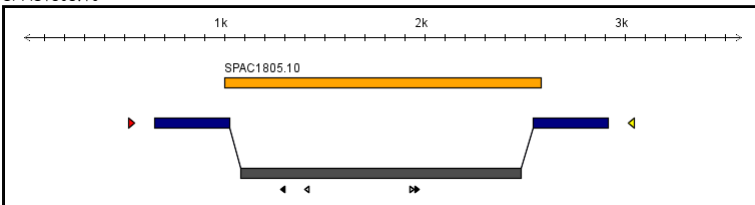

SPAC1805.11c

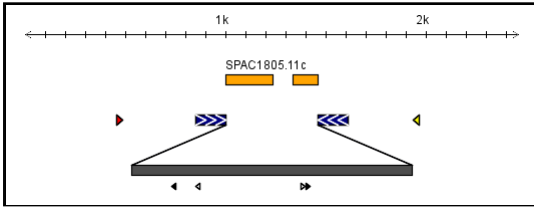

SPAC1805.12c

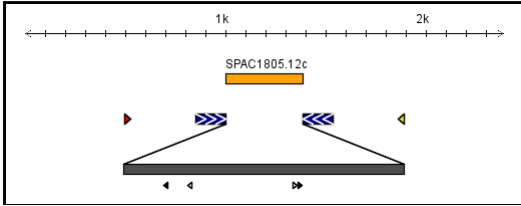

SPAC1805.13

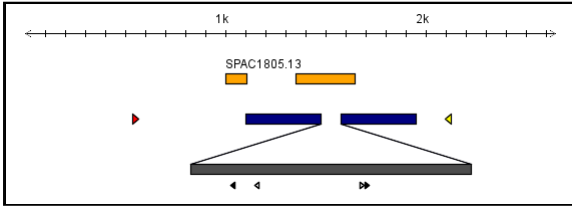

SPAC1805.14

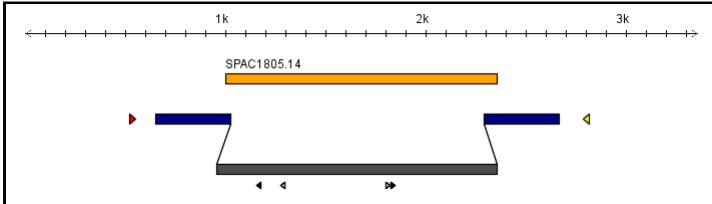

SPAC1805.15c

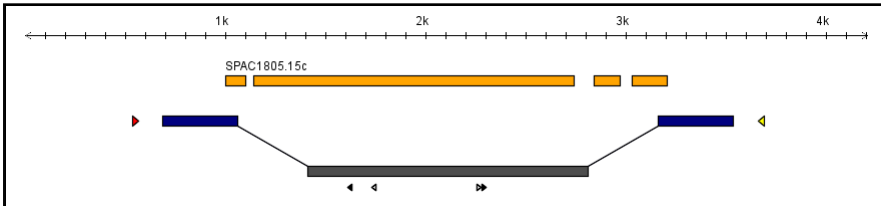

SPAC1805.16c

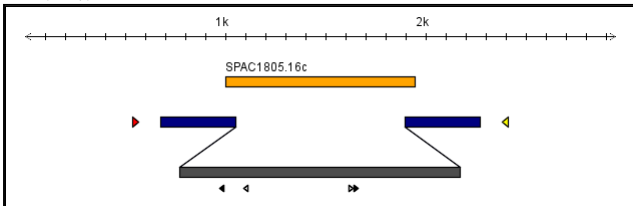

SPAC1834.01

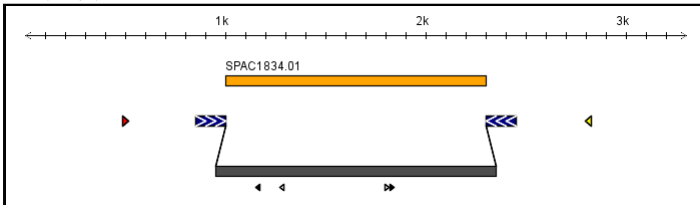

SPAC1834.03c

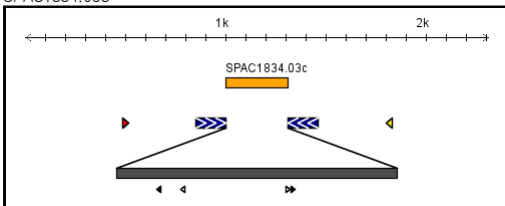

SPAC1834.04

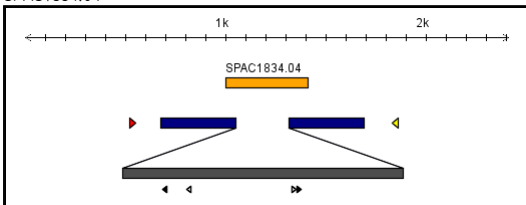

SPAC1834.05

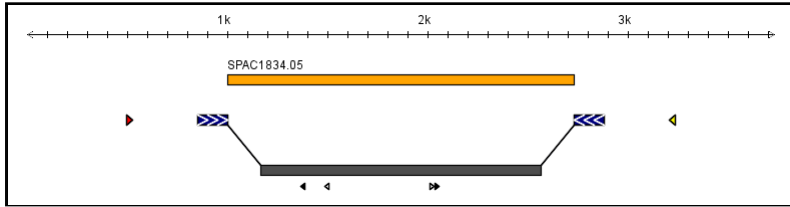

SPAC1834.06c

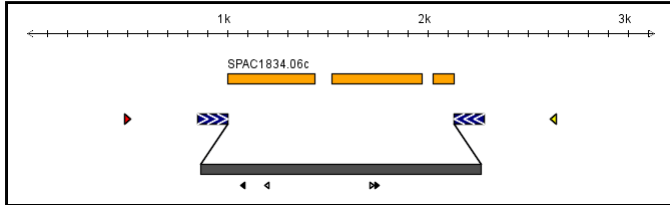

SPAC1834.07

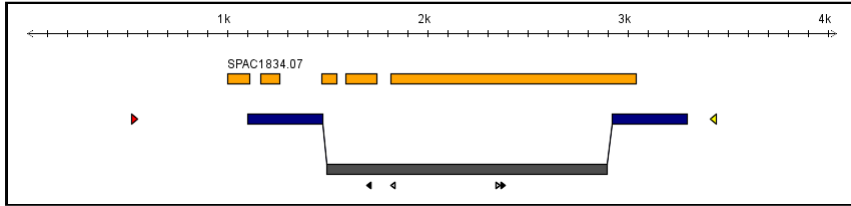

SPAC1834.09

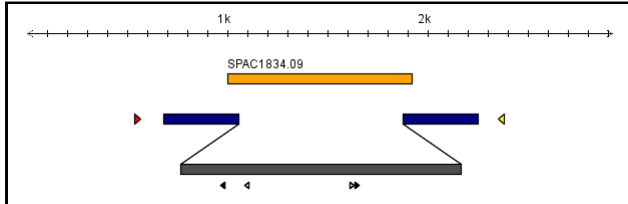

SPAC1834.10c

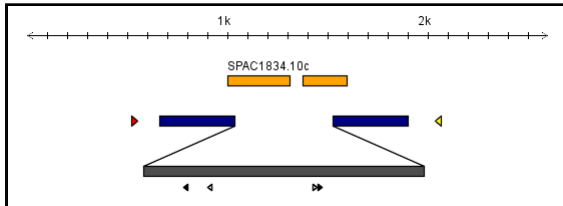

SPAC1834.11c

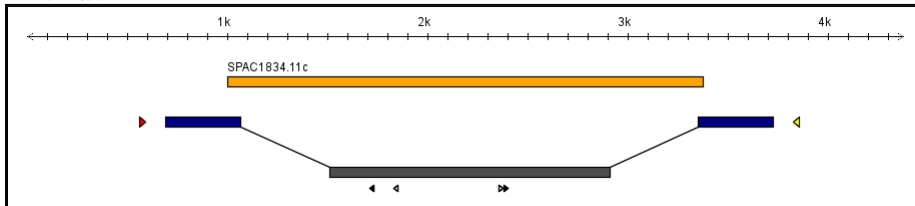

SPAC1851.02

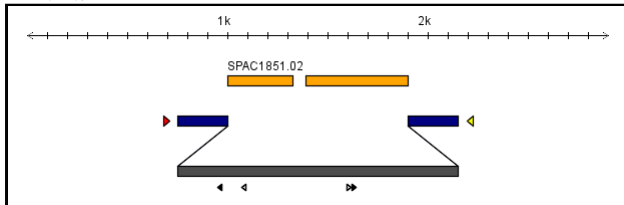

SPAC1851.03

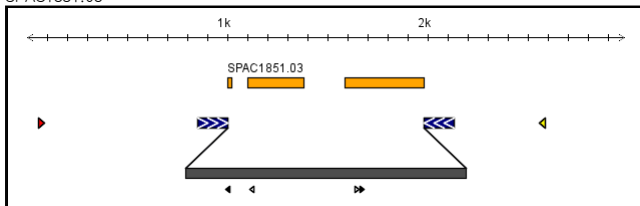

SPAC1851.04c

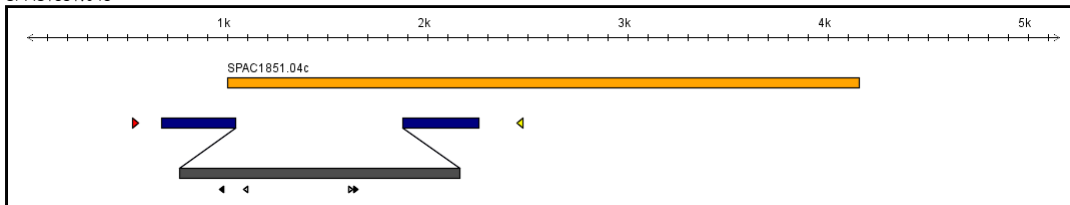

SPAC1952.01

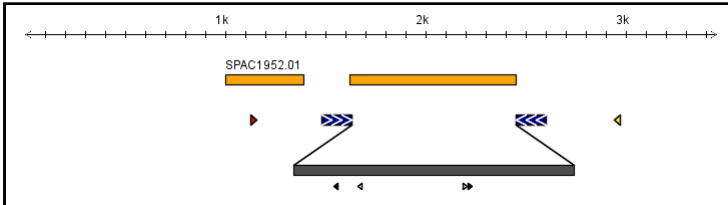

SPAC1952.02

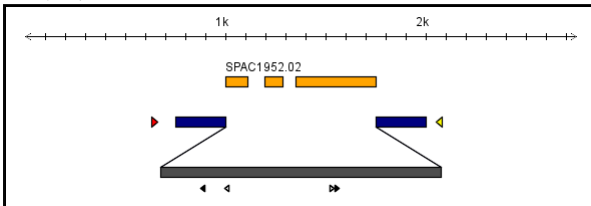

SPAC1952.03

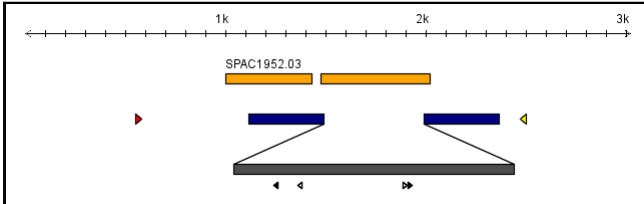

SPAC1952.05

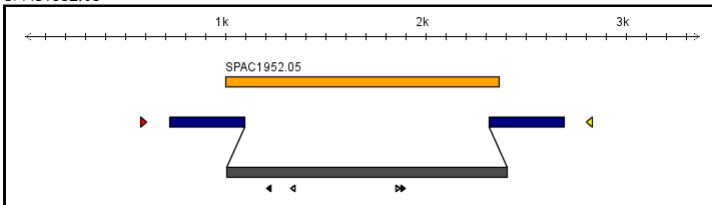

SPAC1952.06c

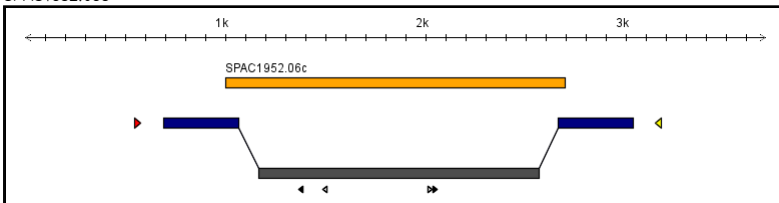

SPAC1952.07

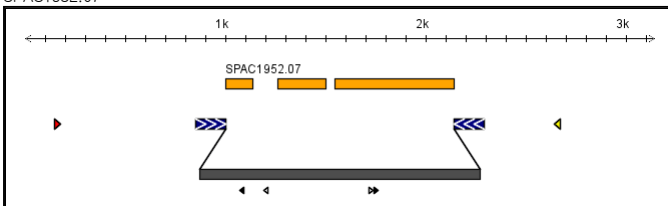

SPAC1952.08c

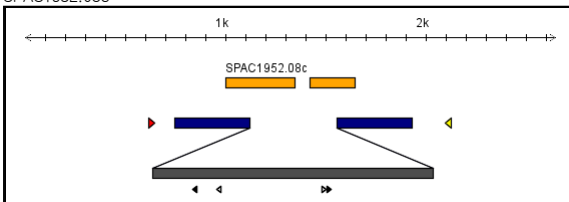

SPAC1952.09c

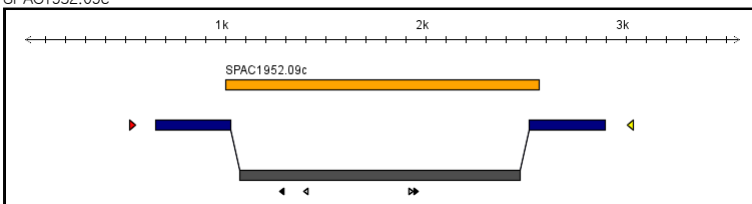

SPAC1952.10c

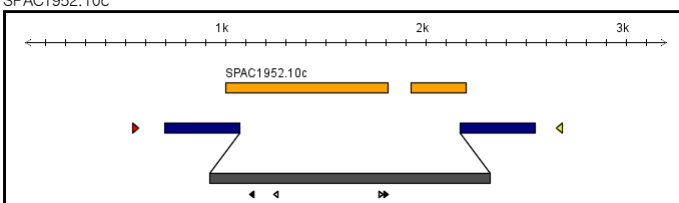



SPAC1952.11c

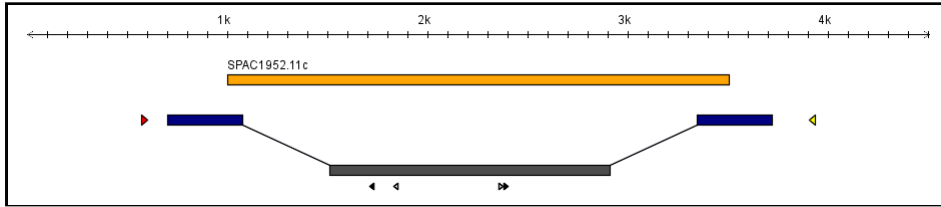

SPAC1952.12c

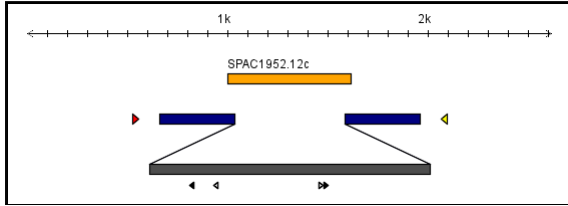

SPAC1952.14c

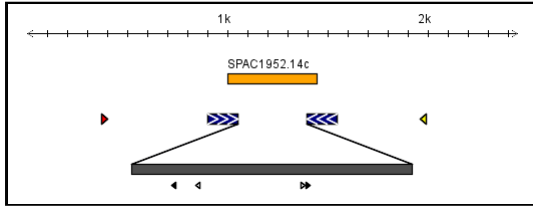

SPAC1952.15c

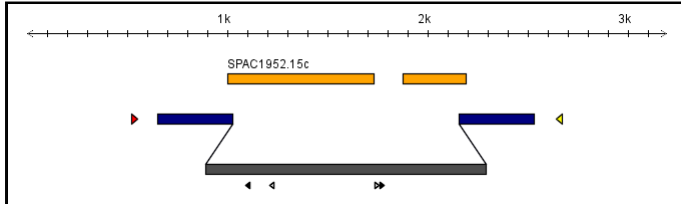

SPAC1952.17c

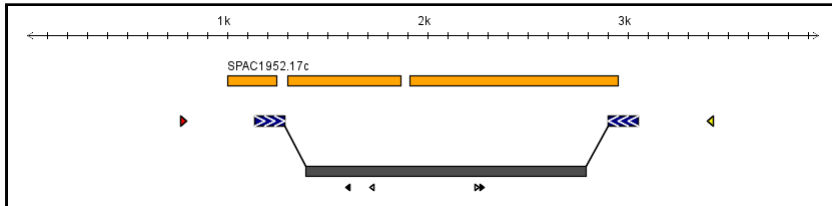

SPACUNK12.02c

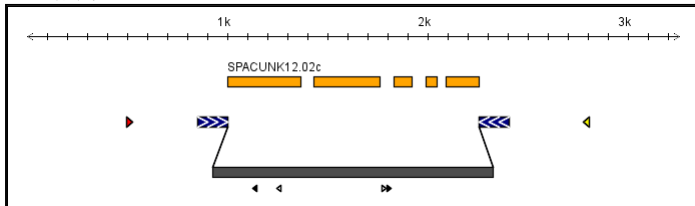

SPACUNK4.06c

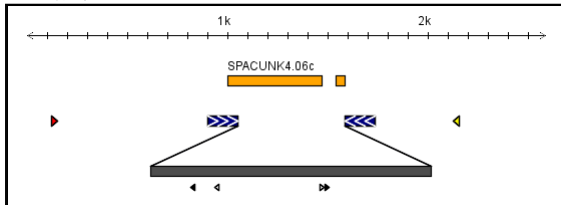

SPACUNK4.09

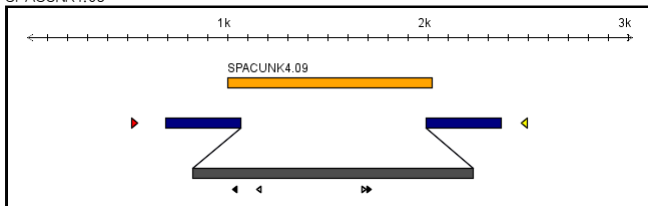

SPACUNK4.10

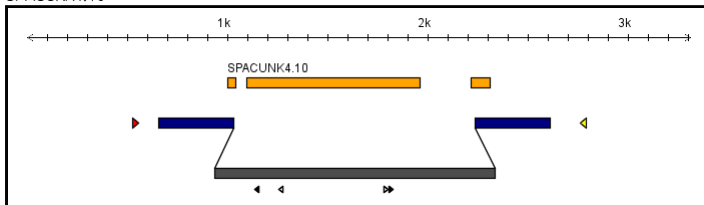

SPACUNK4.11c

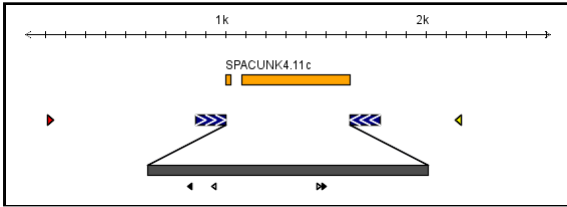

SPACUNK4.13c

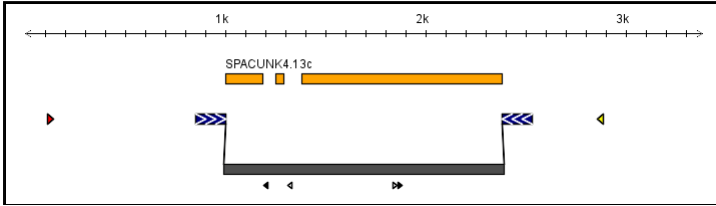

SPACUNK4.14

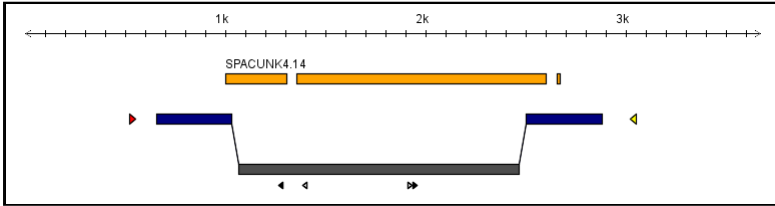

SPACUNK4.15

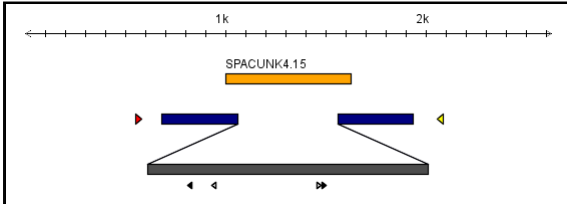

SPACUNK4.16c

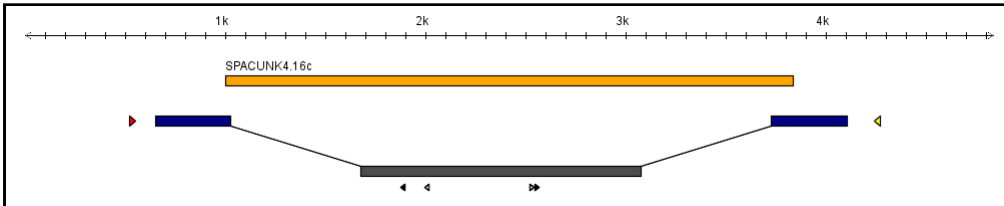

SPACUNK4.17

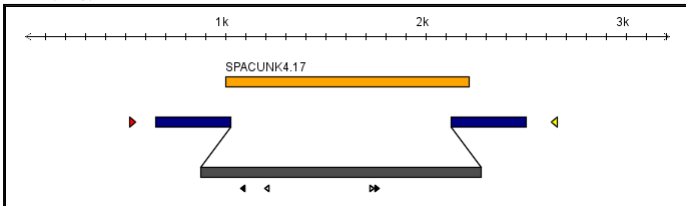

SPACUNK4.19

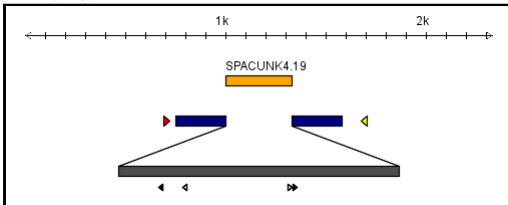

SPAP11E10.01

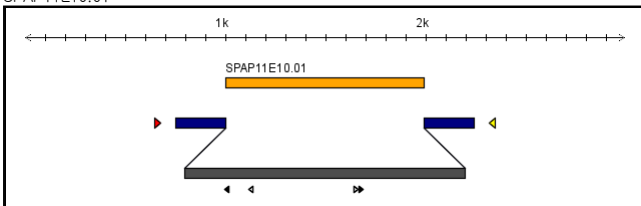

SPAP11E10.02c

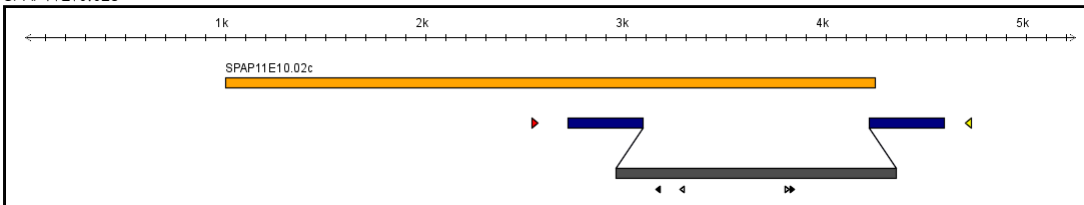

SPAP14E8.02

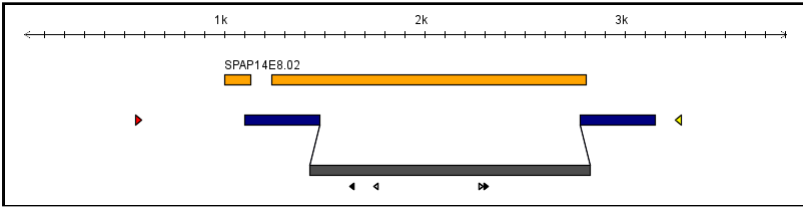

SPAP14E8.03

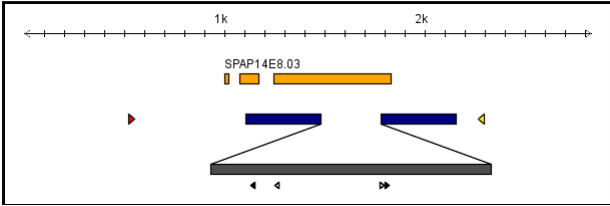

SPAP14E8.04

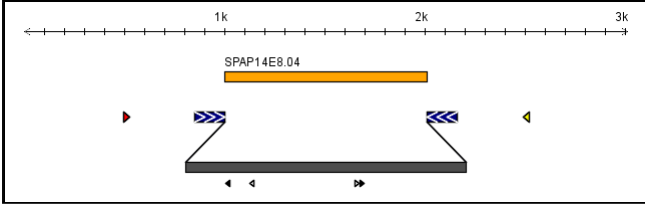

SPAP14E8.05c

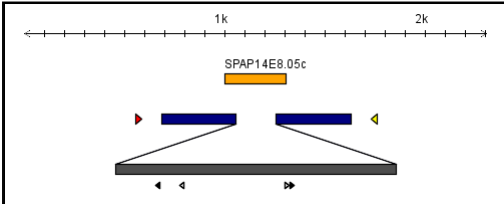

SPAP19A11.05c

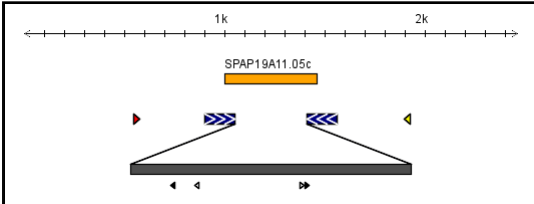

SPAP27G11.02

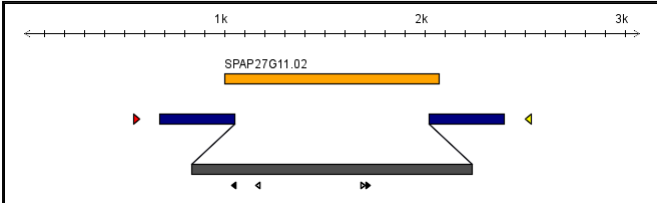

SPAP27G11.03

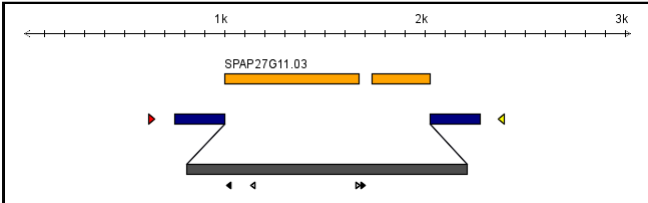

SPAP27G11.04c

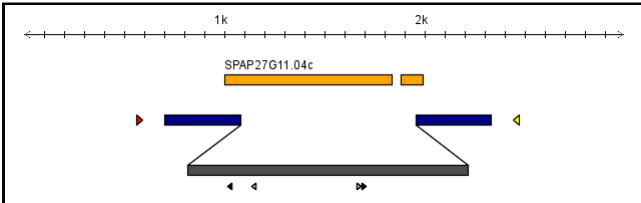

SPAP27G11.06c

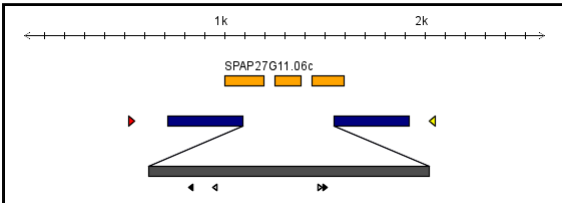

SPAP27G11.07c

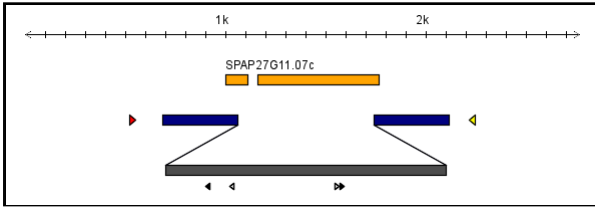

SPAP27G11.08c

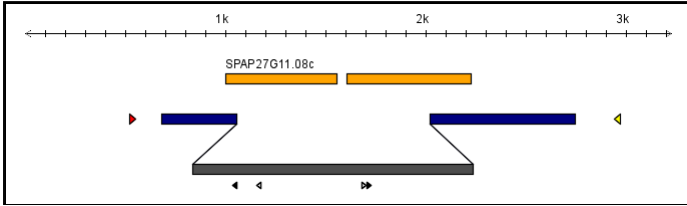

SPAP27G11.09c

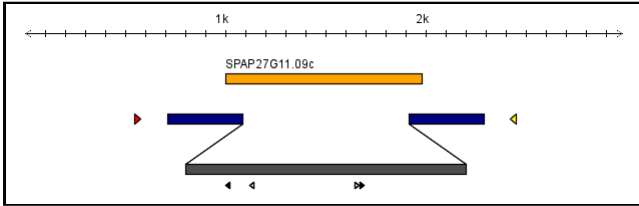

SPAP27G11.12

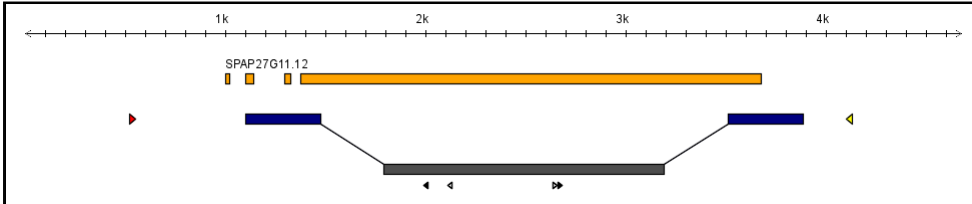

SPAP27G11.13c

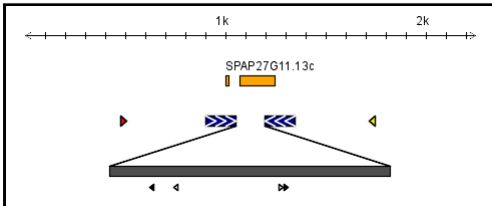

SPAP27G11.14c

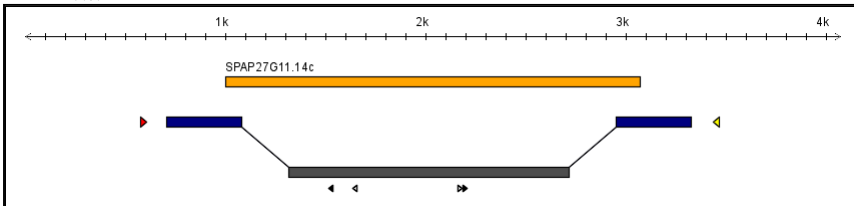

SPAP27G11.15

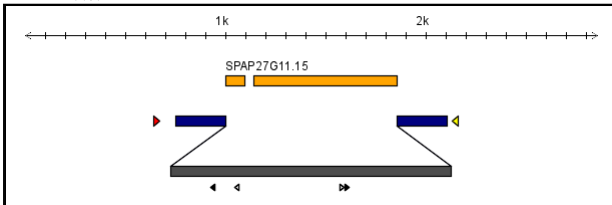

SPAP27G11.16

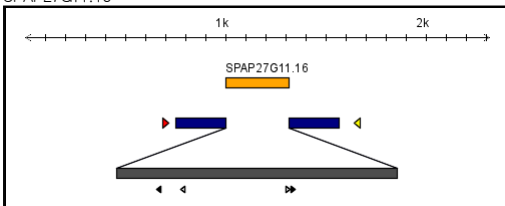

SPAP32A8.02

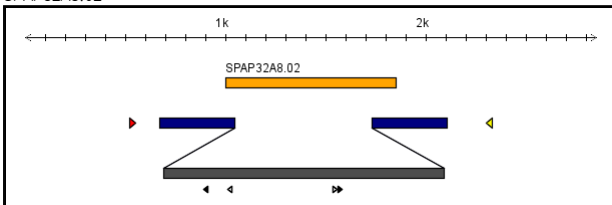

SPAP32A8.03c

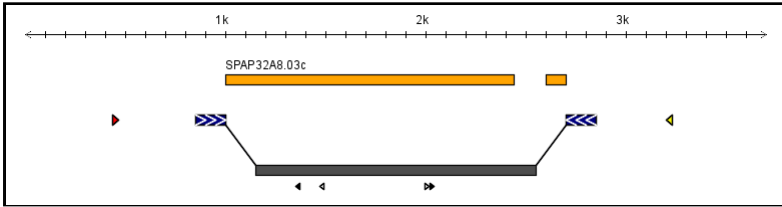

SPAP7G5.02c

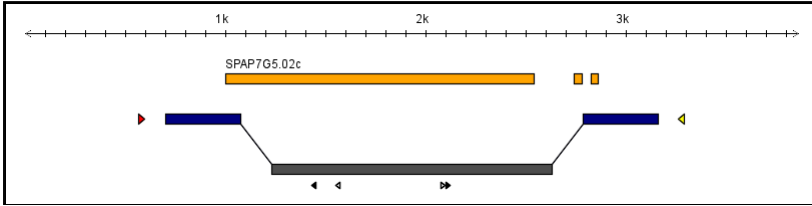

SPAP7G5.03

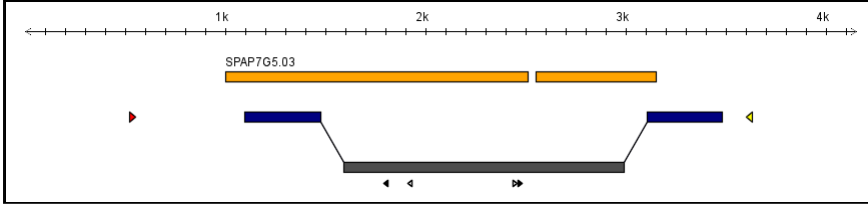

SPAP7G5.05

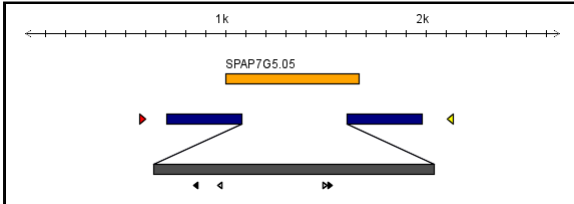

SPAP7G5.06

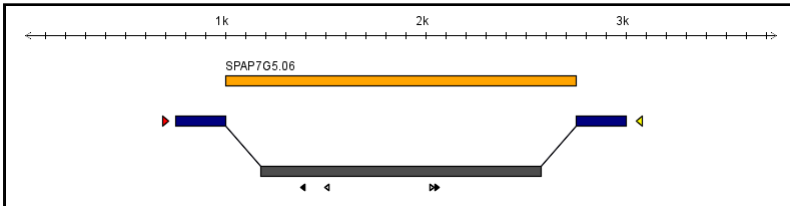

SPAP8A3.02c

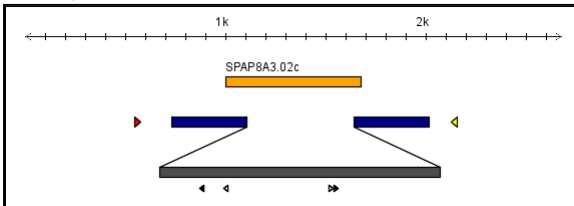

SPAP8A3.03

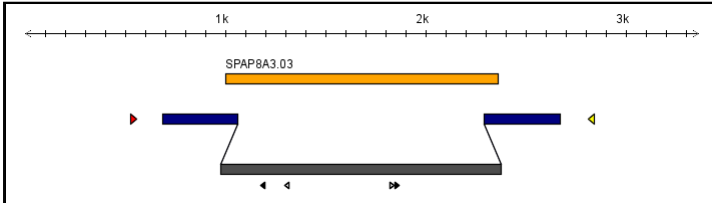

SPAP8A3.04c

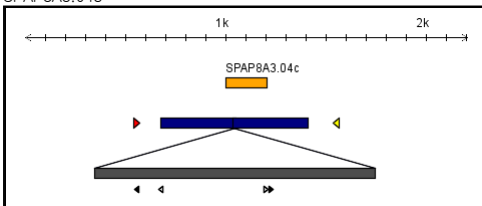

SPAP8A3.05

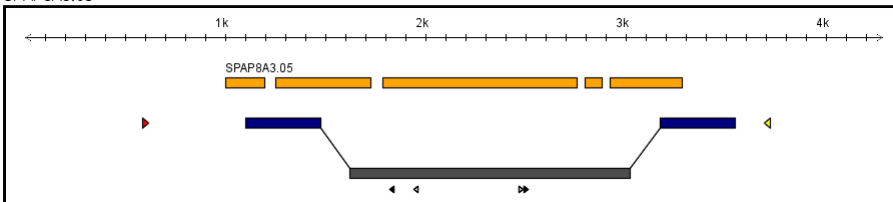

SPAP8A3.06

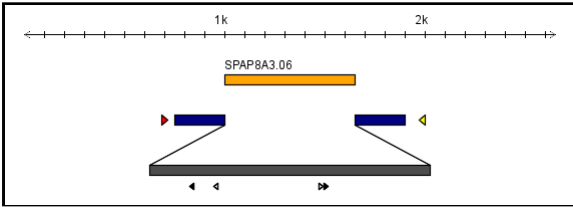

SPAP8A3.07c

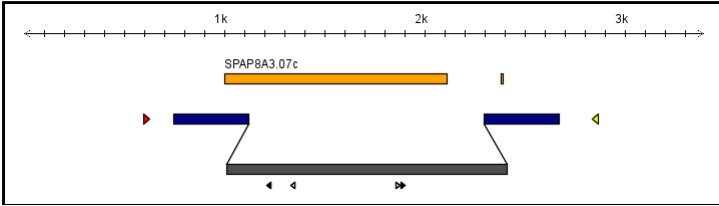

SPAP8A3.08

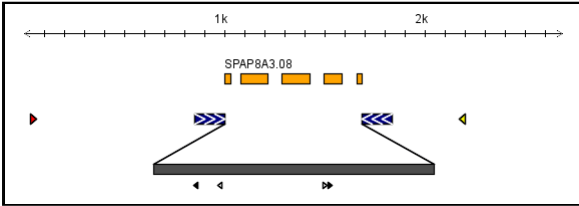

SPAP8A3.10

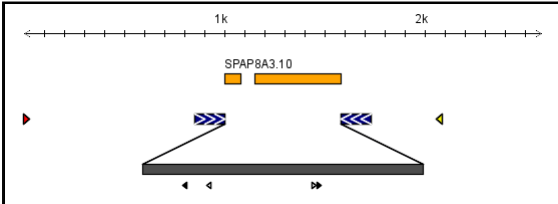

SPAP8A3.11c

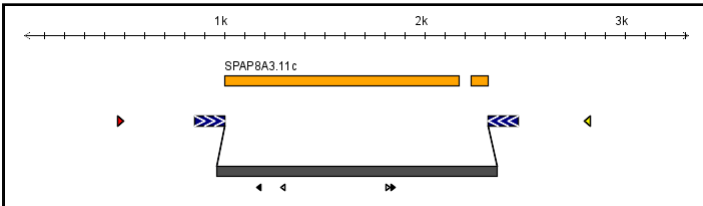

SPAP8A3.13c

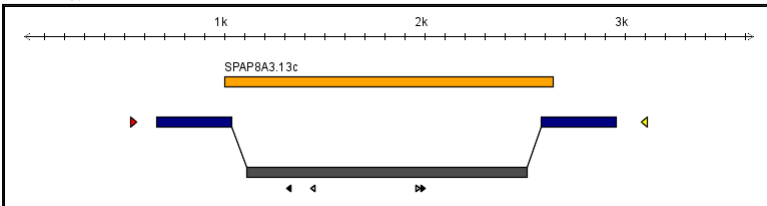

SPAP8A3.14c

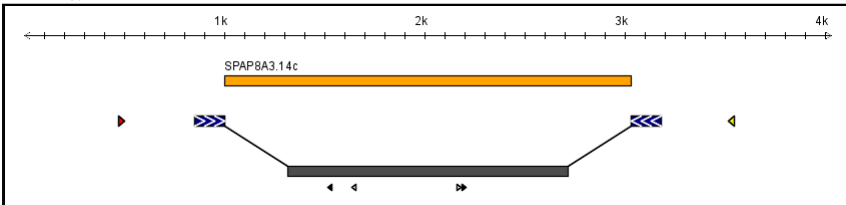

SPAPB17E12.02

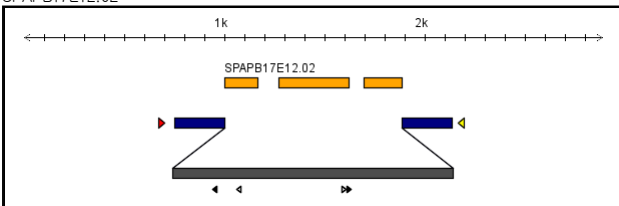

SPAPB17E12.03

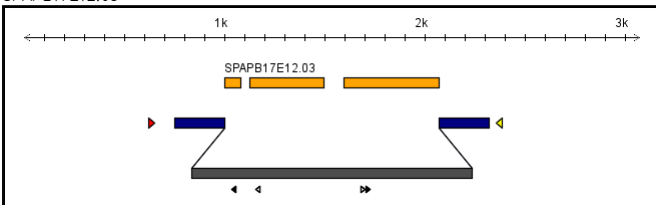

SPAPB17E12.04c

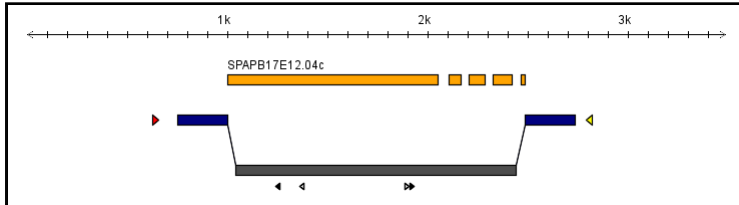

SPAPB17E12.05

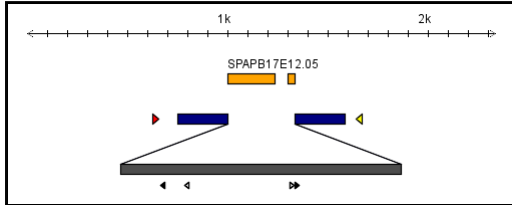

SPAPB17E12.07c

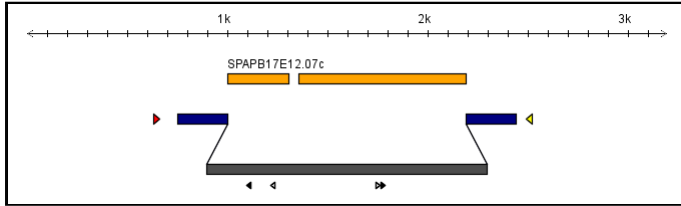

SPAPB17E12.08

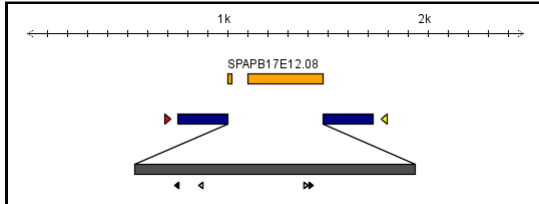

SPAPB17E12.09

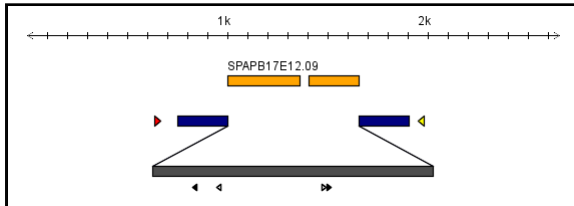

SPAPB17E12.10c

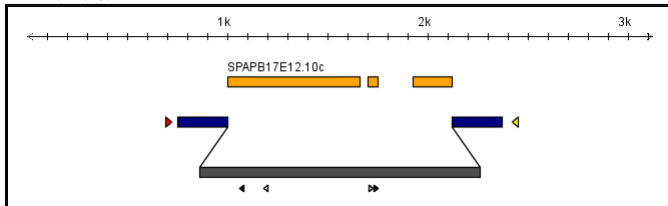

SPAPB17E12.11

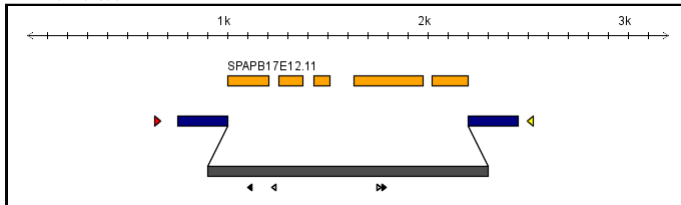

SPAPB17E12.12c

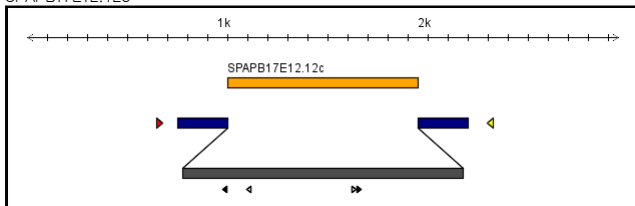

SPAPB17E12.13

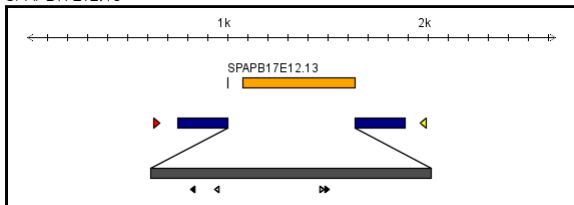

SPAPB17E12.14c

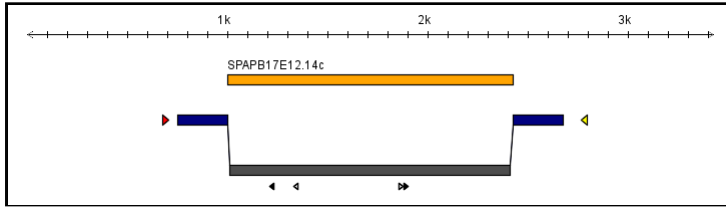

SPAPB18E9.01

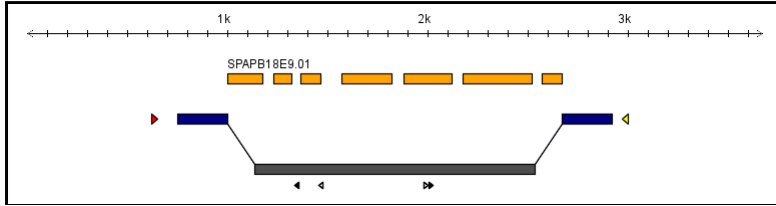

SPAPB18E9.04c

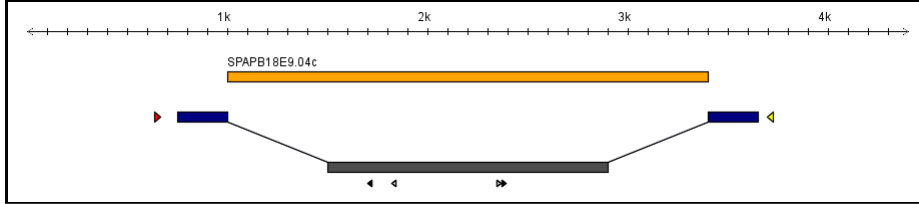

SPAPB1A10.02

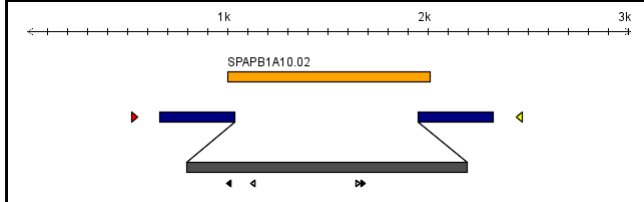

SPAPB1A10.03

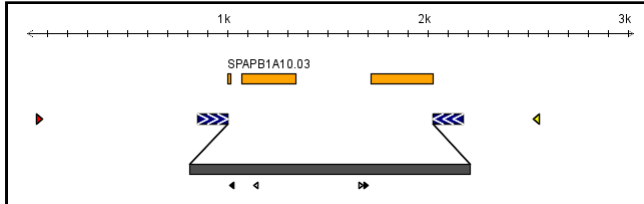

SPAPB1A10.04c

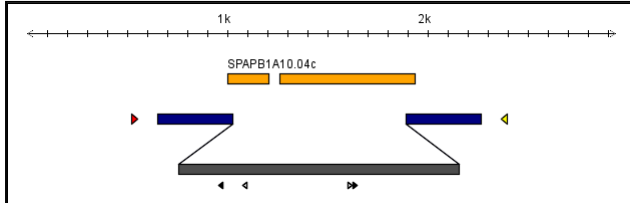

SPAPB1A10.05

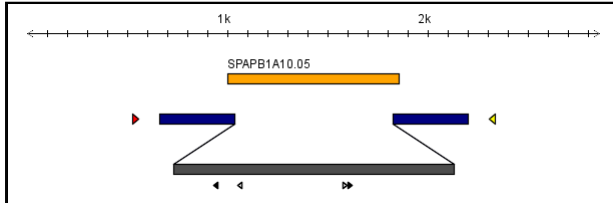

SPAPB1A10.07c

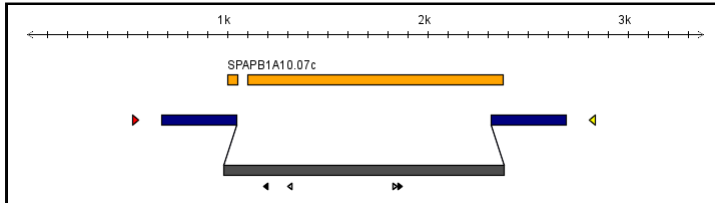

SPAPB1A10.08

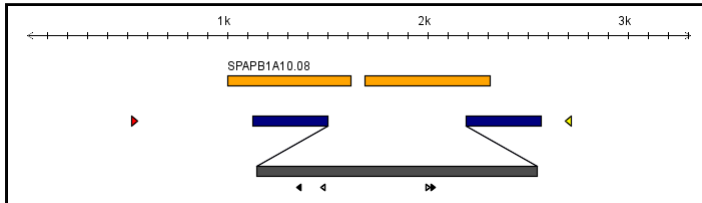



SPAPB1A10.09

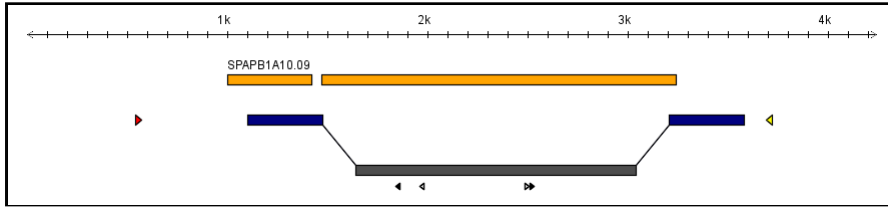

SPAPB1A10.10c

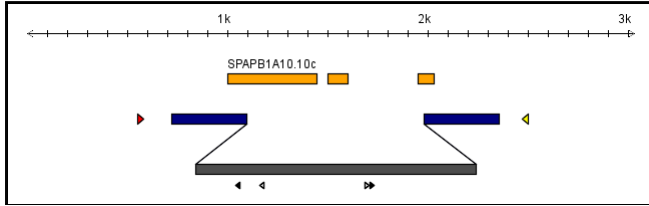

SPAPB1A10.11c

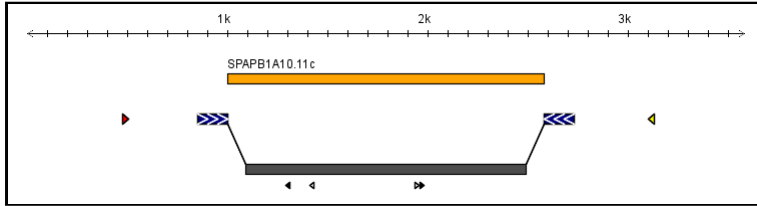

SPAPB1A10.12c

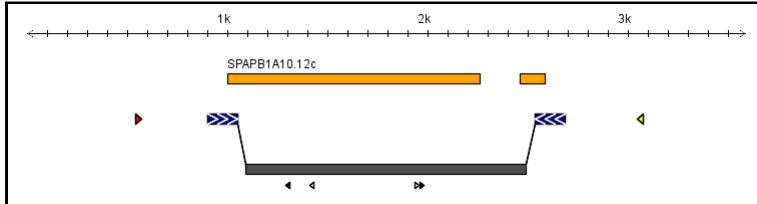

SPAPB1A10.13

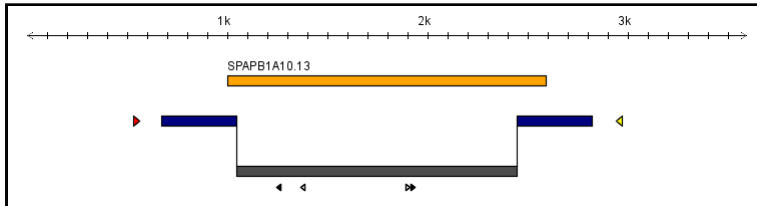

SPAPB1A10.14

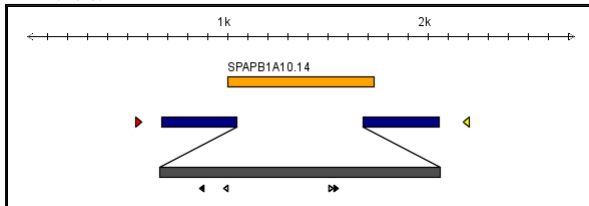

SPAPB1A10.15

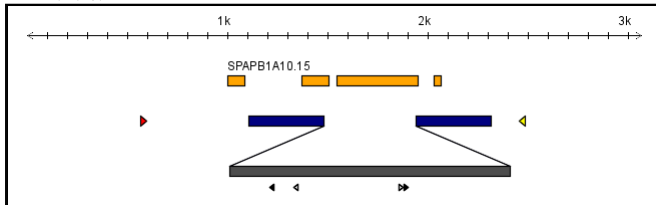

SPAPB1A11.01

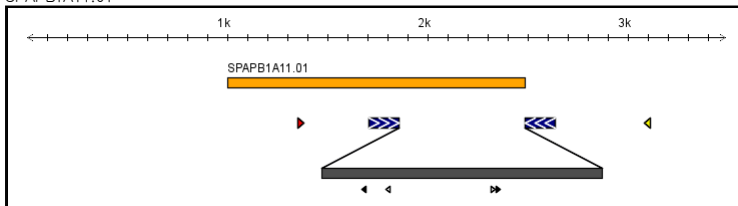

SPAPB1A11.02

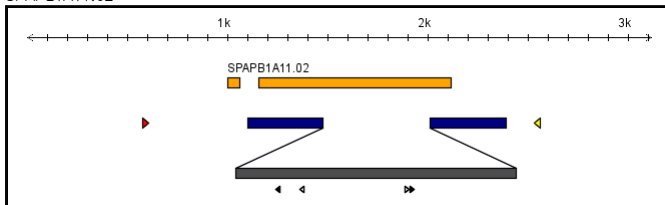

SPAPB1A11.03

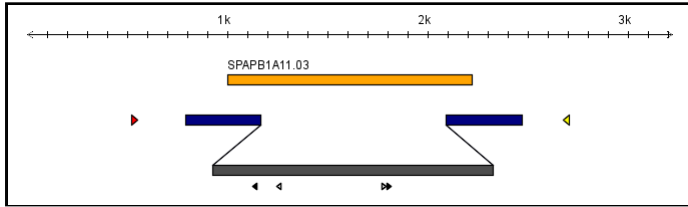

SPAPB1A11.04c

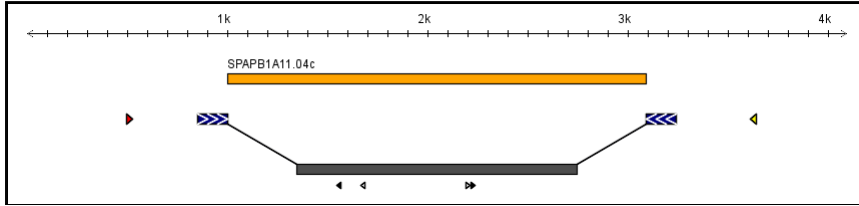

SPAPB1E7.01c

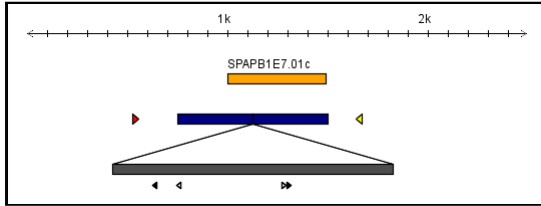

SPAPB1E7.02c

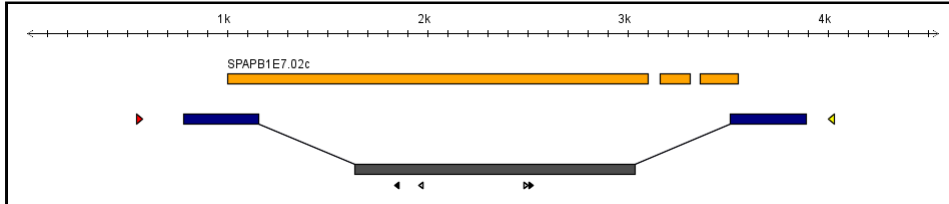

SPAPB1E7.03

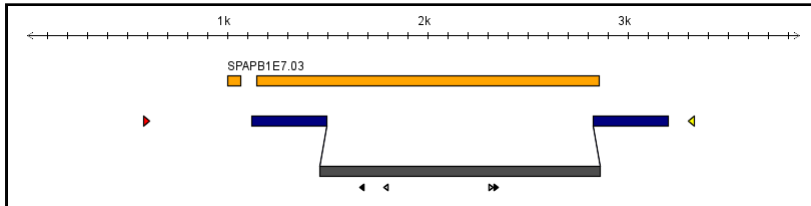

SPAPB1E7.06c

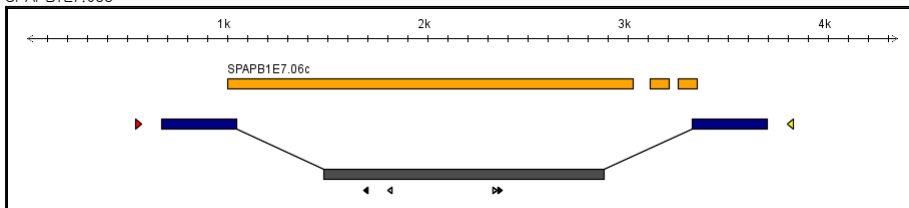

SPAPB1E7.08c

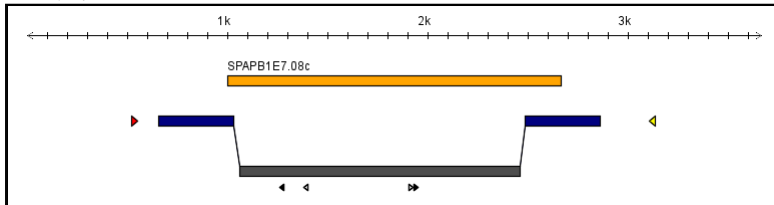

SPAPB1E7.09

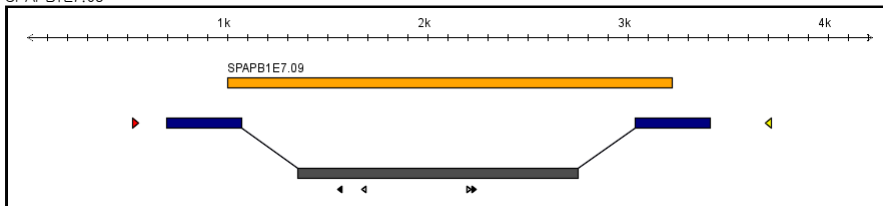

SPAPB1E7.10

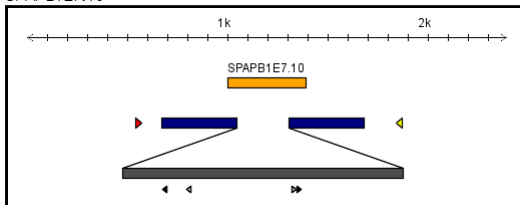

SPAPB1E7.11c

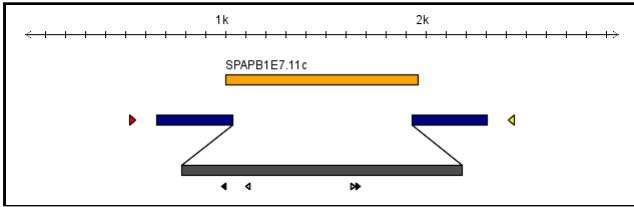

SPAPB1E7.12

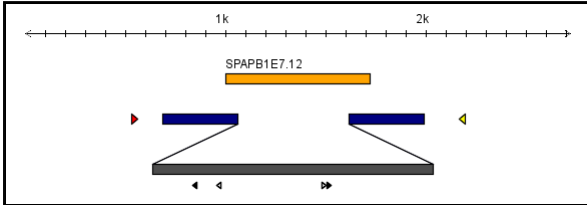

SPAPB21F2.03

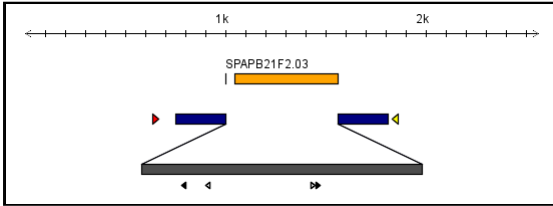

SPAPB24D3.02c

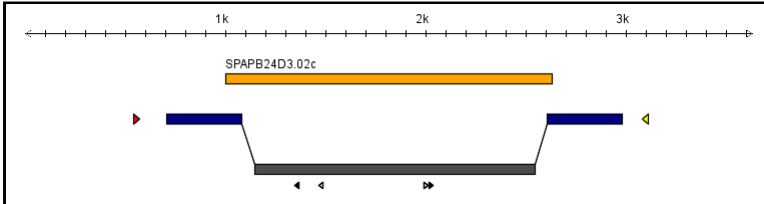

SPAPB24D3.03

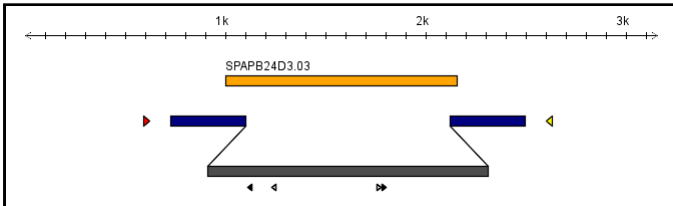

SPAPB24D3.04c

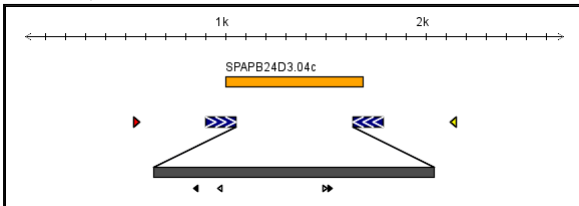

SPAPB24D3.06c

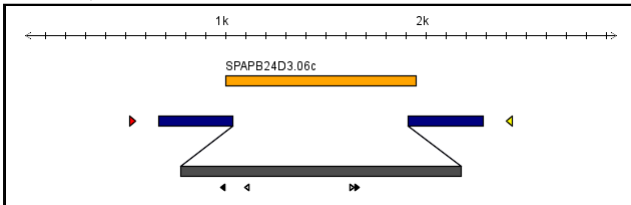

SPAPB24D3.07c

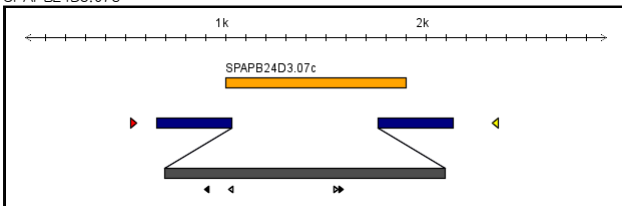

SPAPB24D3.08c

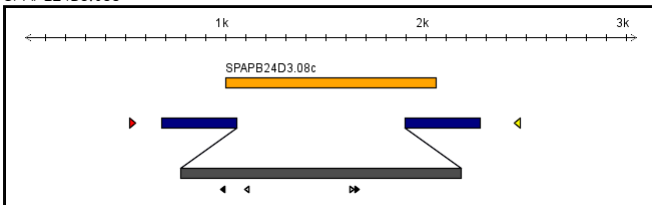

SPAPB2B4.01c

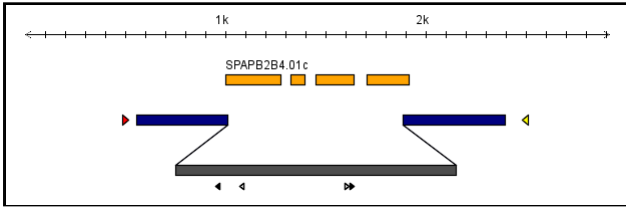

SPAPB2B4.02

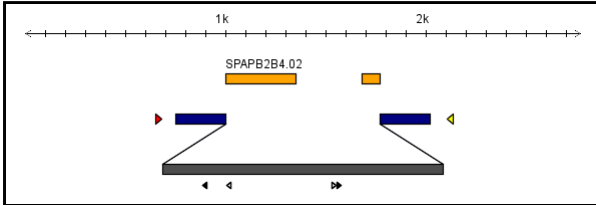

SPAPB2B4.03

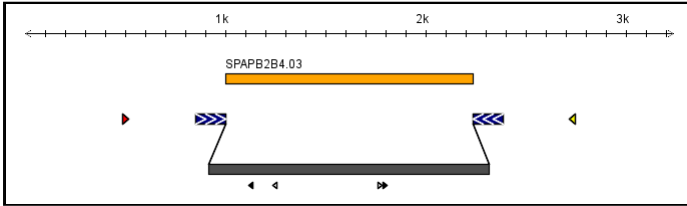

SPAPB2B4.05

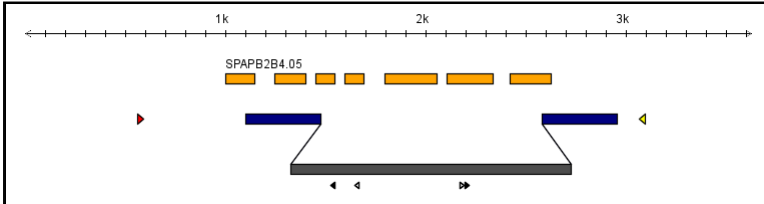

SPAPB2B4.06

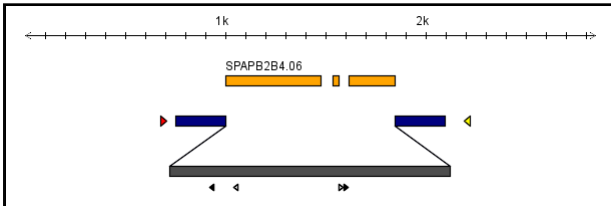

SPAPB2B4.07

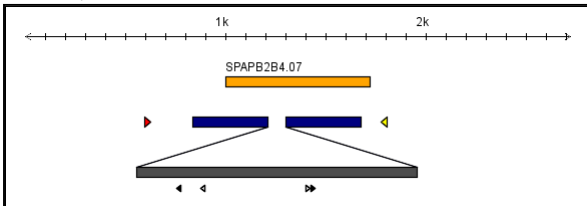

SPAPB8E5.02c

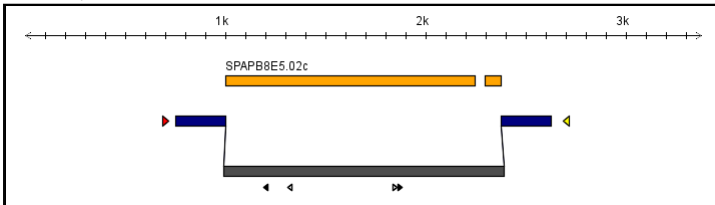

SPAPB8E5.03

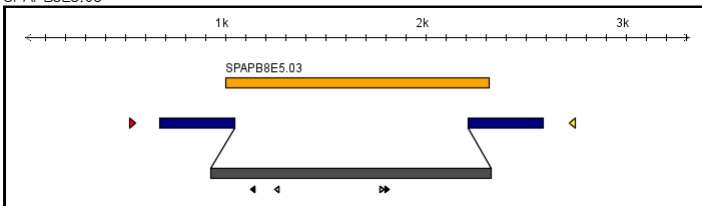

SPAPB8E5.04c

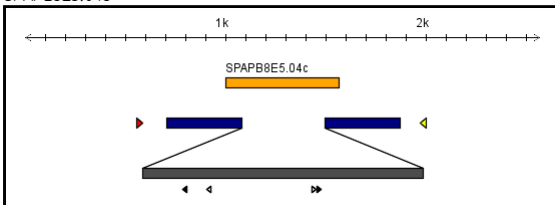

SPAPB8E5.05

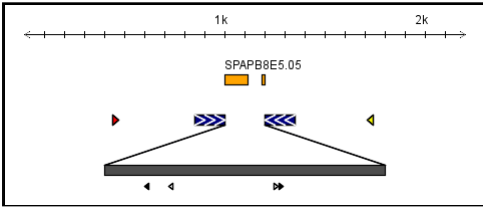

SPAPB8E5.06c

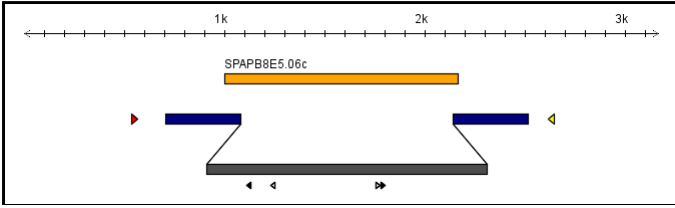

SPAPB8E5.08

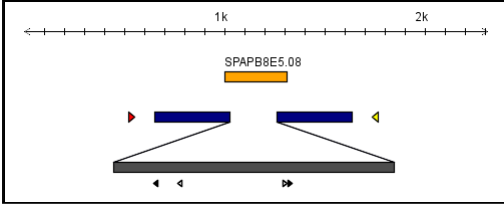

SPAPB8E5.09

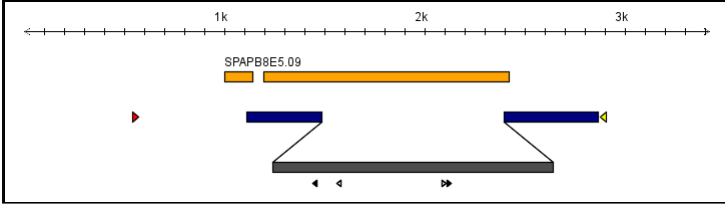

SPAPB8E5.10

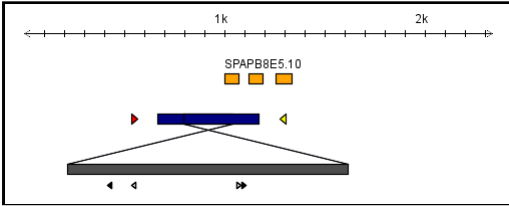

SPAPJ691.02

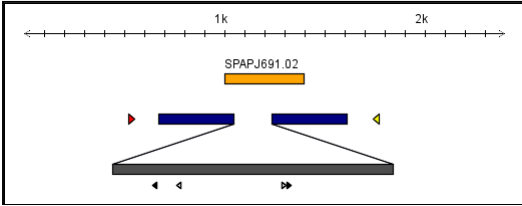

SPAPJ691.03

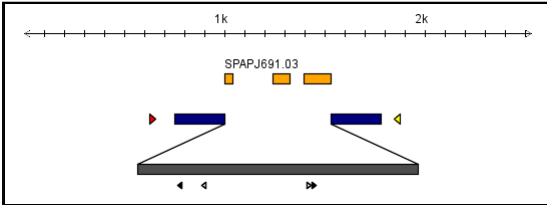

SPAPJ695.01c

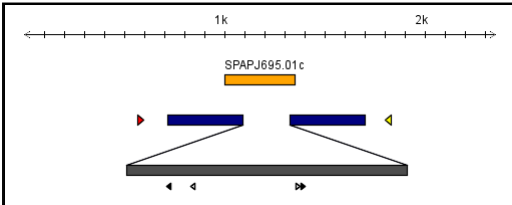

SPAPJ696.01c

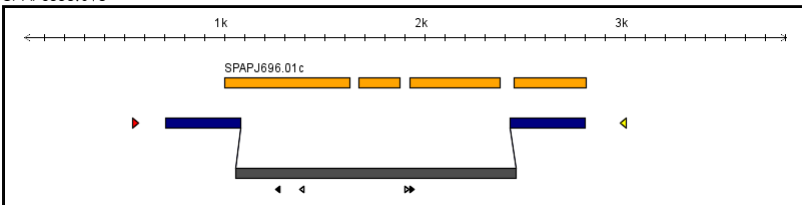

SPAPJ696.02

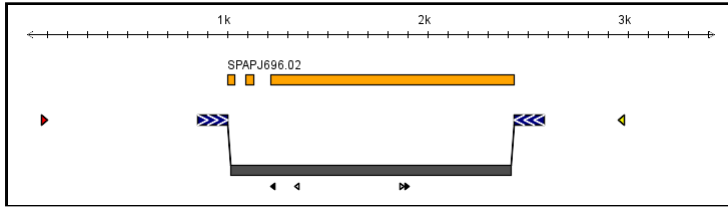

SPAPJ698.02c

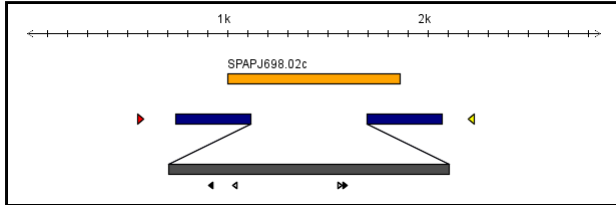

SPAPJ760.03c

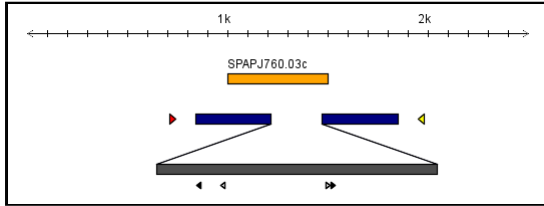

SPAPYUG7.02c

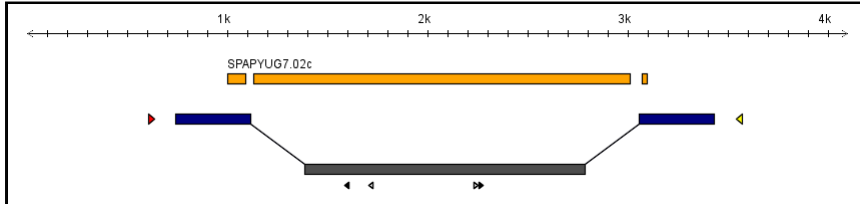

SPAPYUG7.03c

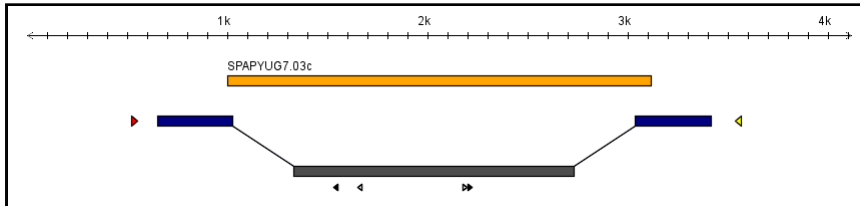

SPAPYUG7.04c

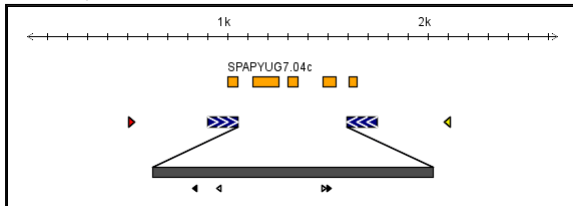

SPAPYUG7.05

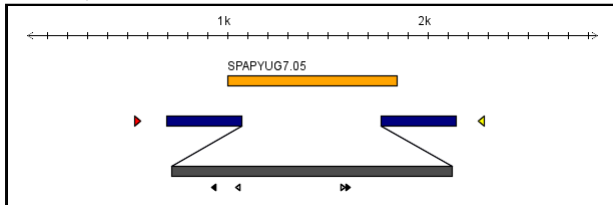

SPAPYUG7.06

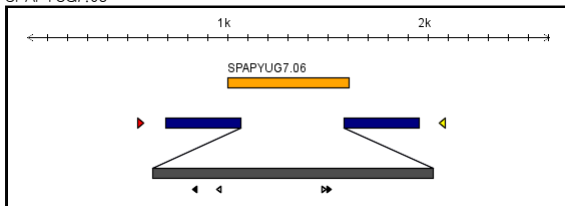

SPBC11B10.01

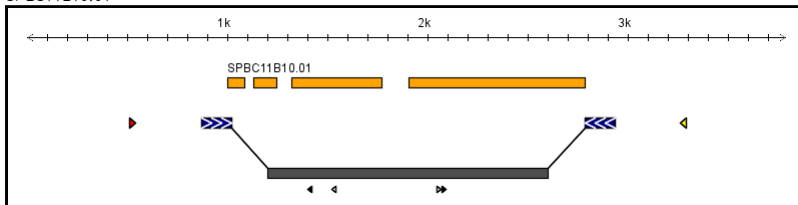

SPBC11B10.02c

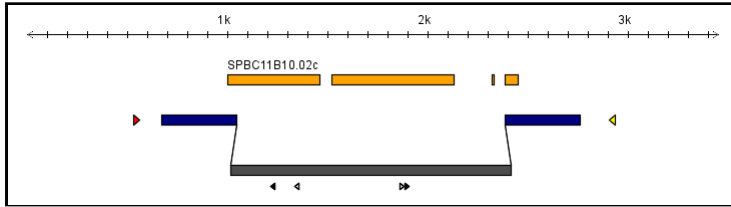

SPBC11B10.03

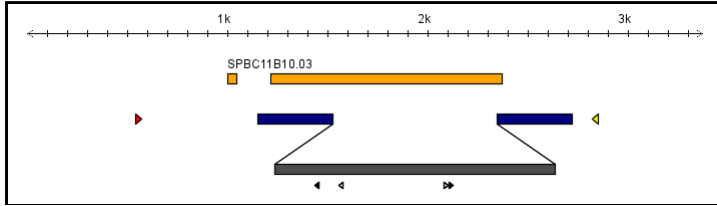

SPBC11B10.04c

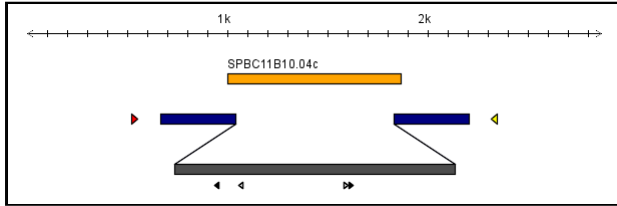

SPBC11B10.05c

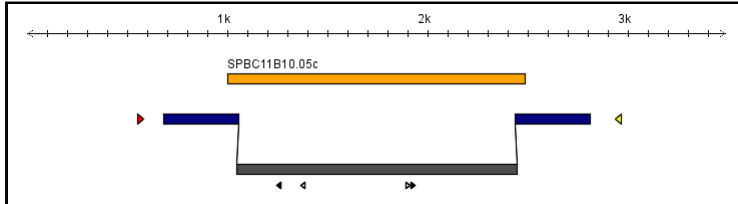

SPBC11B10.06

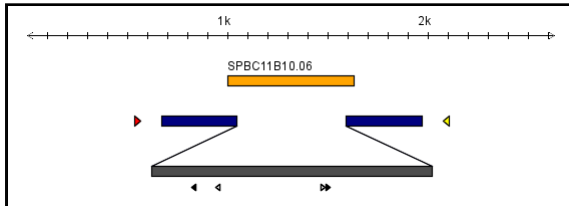

SPBC11B10.07c

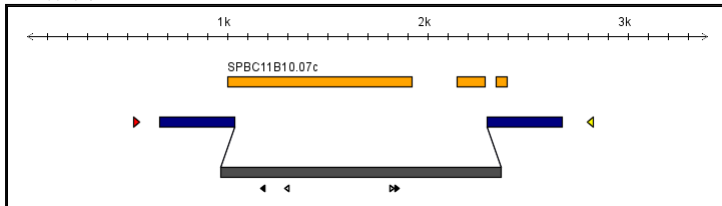

SPBC11B10.08

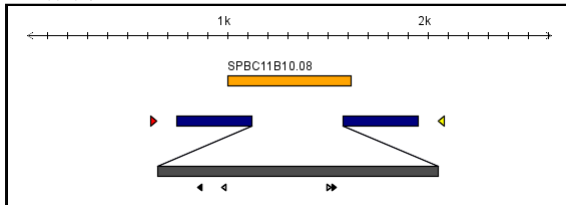

SPBC11B10.09

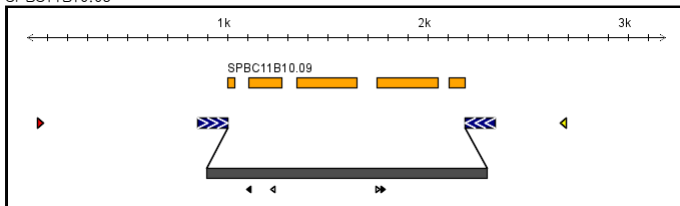

SPBC11B10.10c

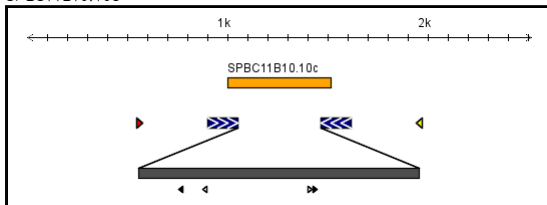

SPBC11C11.01

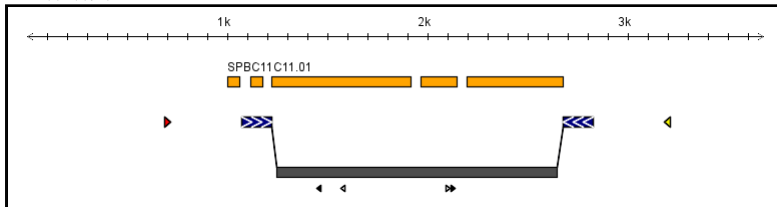

SPBC11C11.02

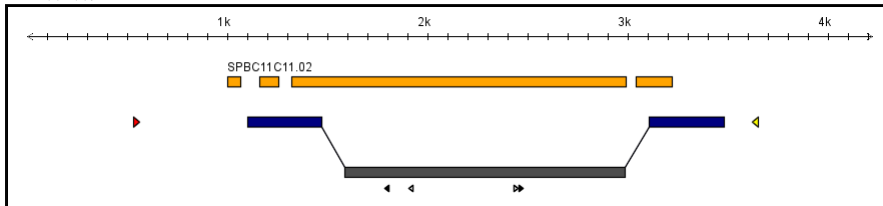

SPBC11C11.03

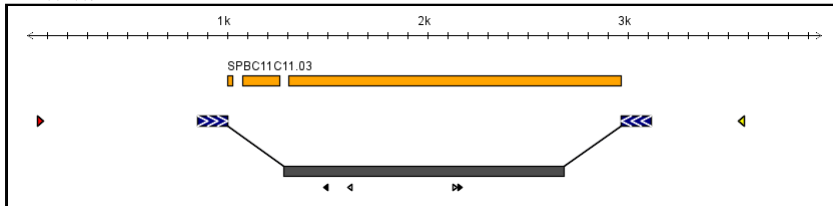

SPBC11C11.05

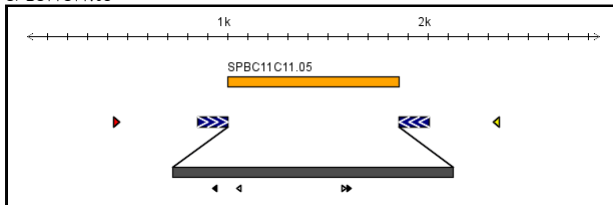

SPBC11C11.06c

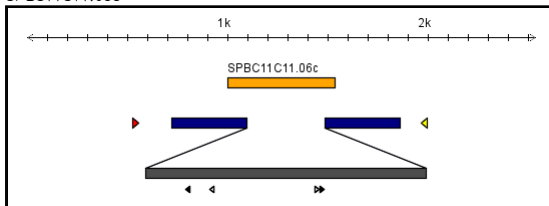

SPBC11C11.07

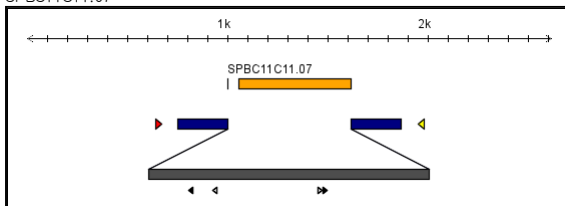

SPBC11C11.08

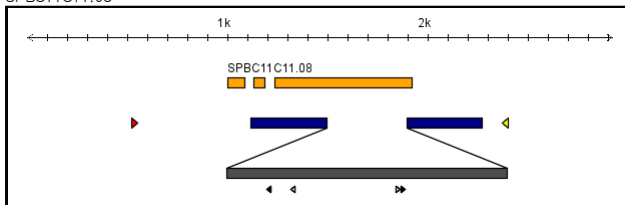

SPBC11C11.09c

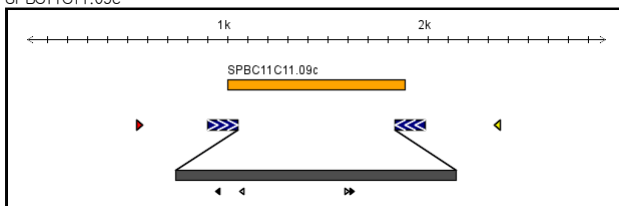

SPBC11C11.10

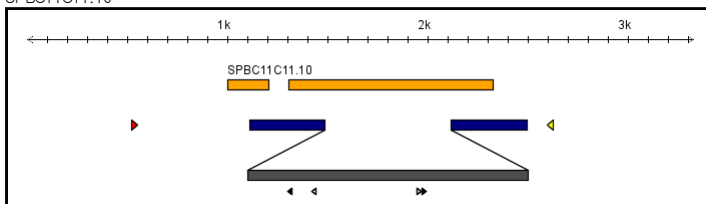



SPBC11C11.11c

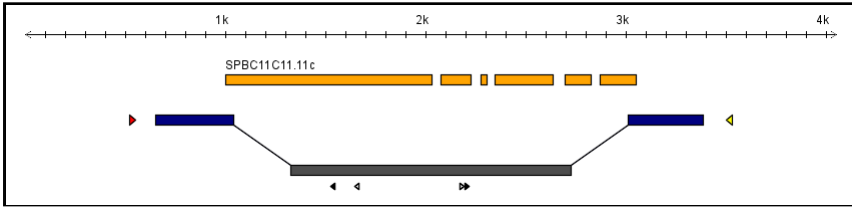

SPBC11G11.01

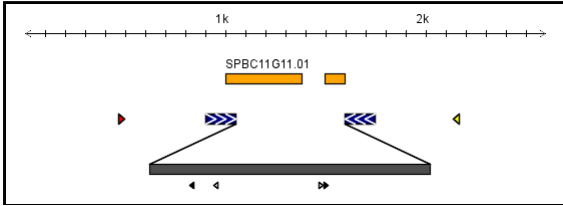

SPBC11G11.02c

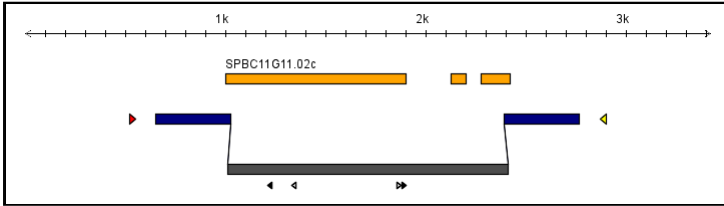

SPBC11G11.03

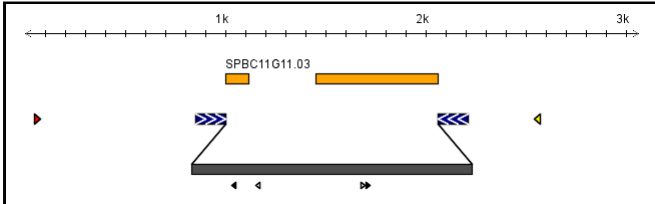

SPBC11G11.04

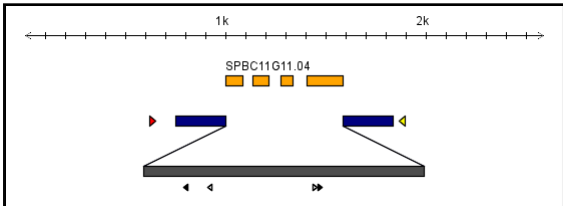

SPBC11G11.05

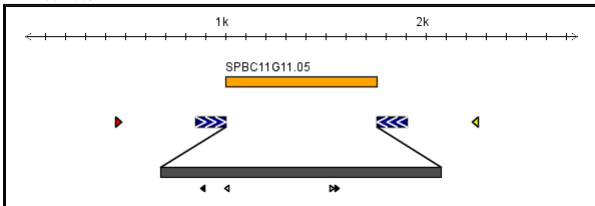

SPBC11G11.06c

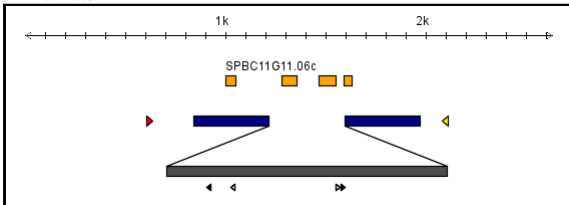

SPBC12C2.01c

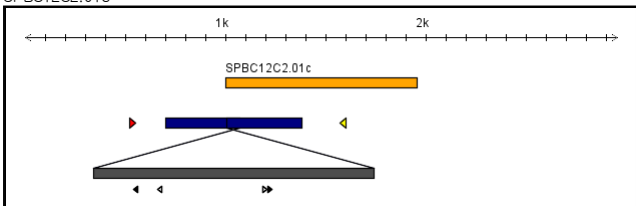

SPBC12C2.03c

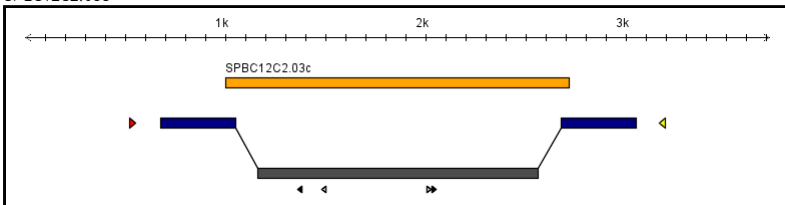

SPBC12C2.04

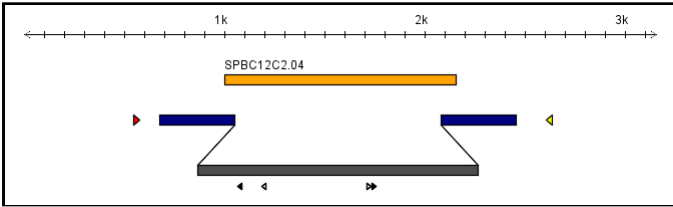

SPBC12C2.06

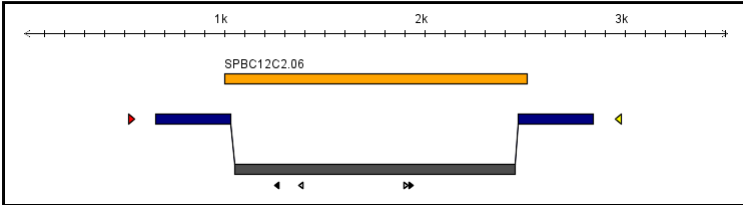

SPBC12C2.07c

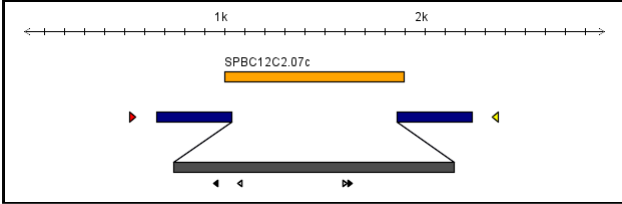

SPBC12C2.08

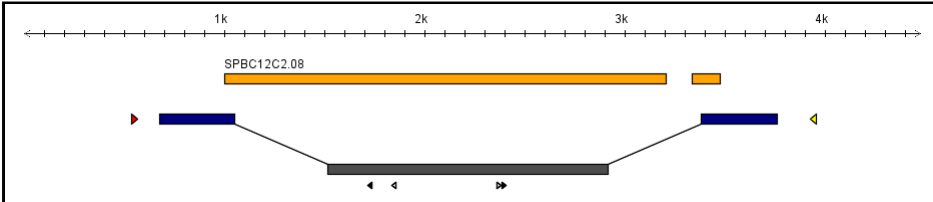

SPBC12C2.09c

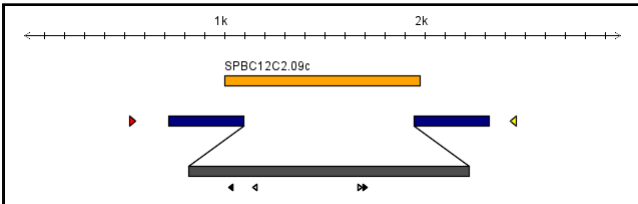

SPBC12C2.11

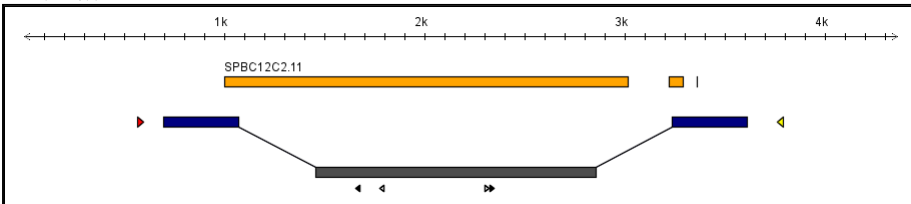

SPBC12C2.12c

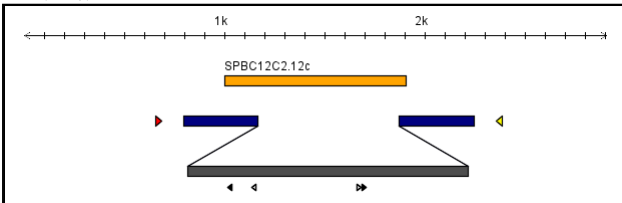

SPBC12C2.13c

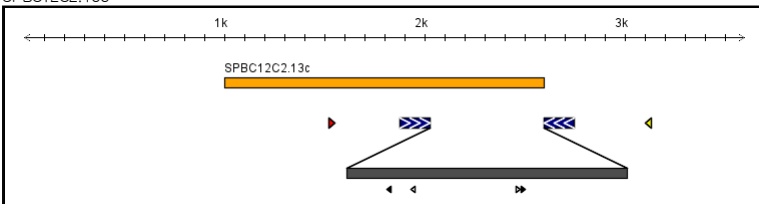

SPBC12D12.01

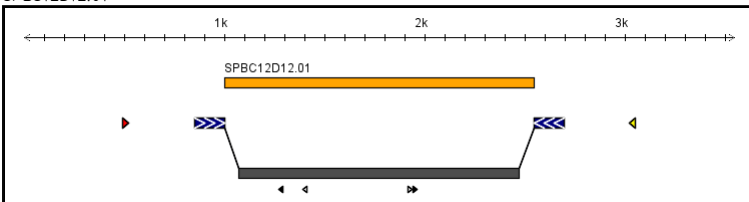

SPBC12D12.02c

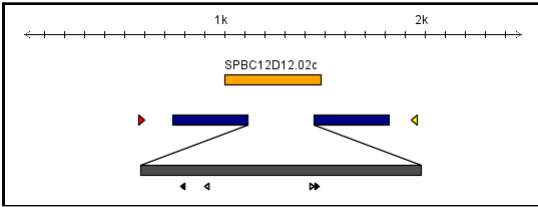

SPBC12D12.03

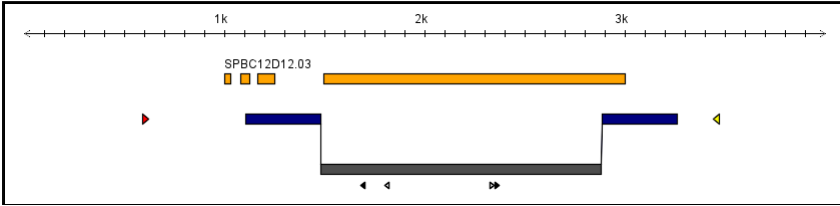

SPBC12D12.05c

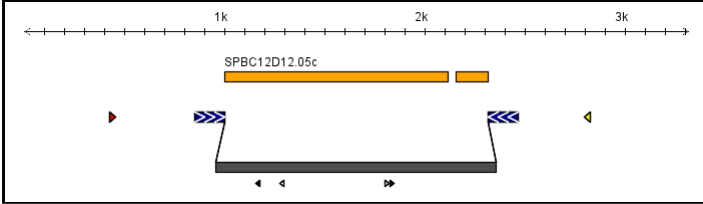

SPBC12D12.06

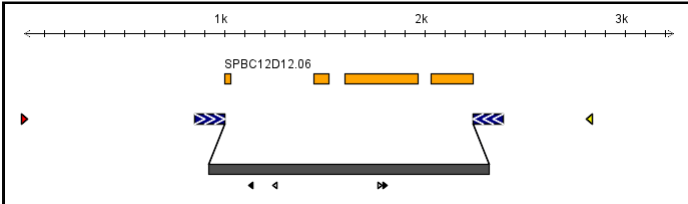

SPBC12D12.07c

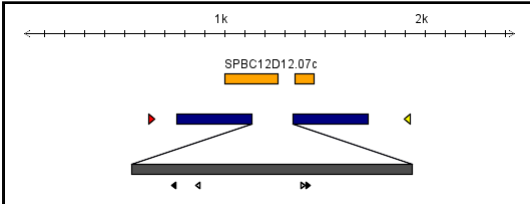

SPBC12D12.08c

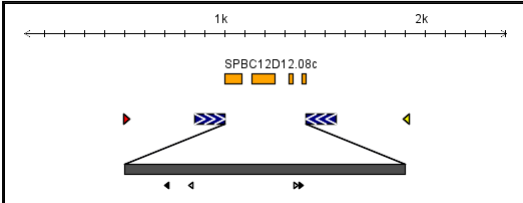

SPBC12D12.09

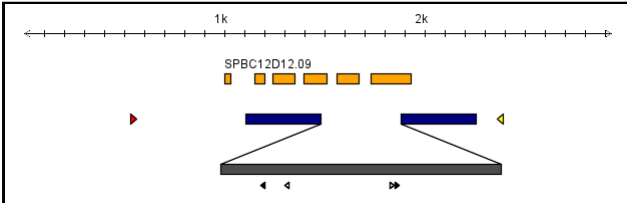

SPBC13A2.01c

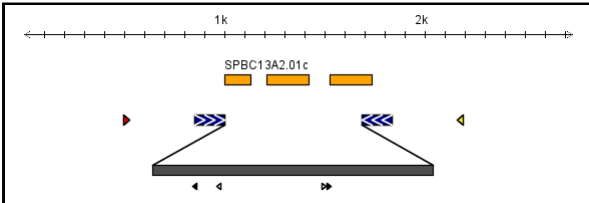

SPBC13A2.02

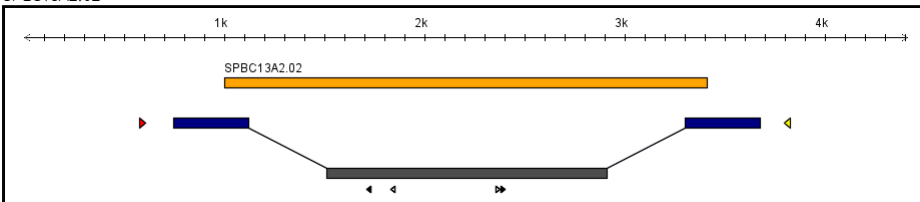

SPBC13A2.03

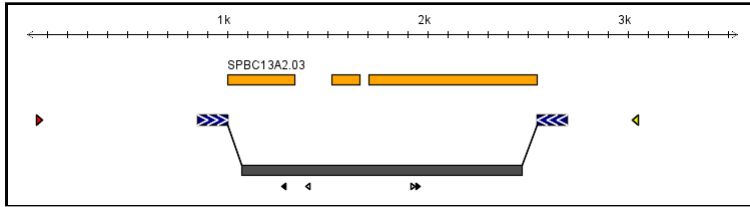

SPBC13A2.04c

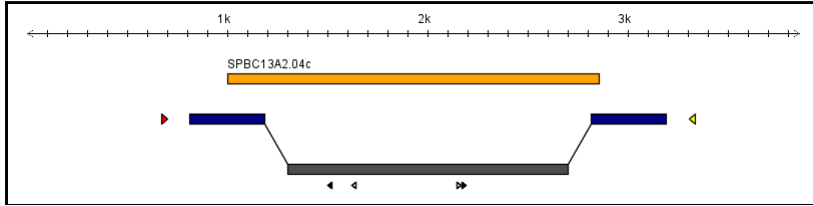

SPBC13E7.01

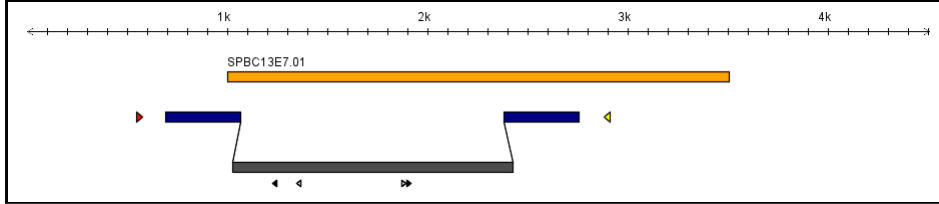

SPBC13E7.02

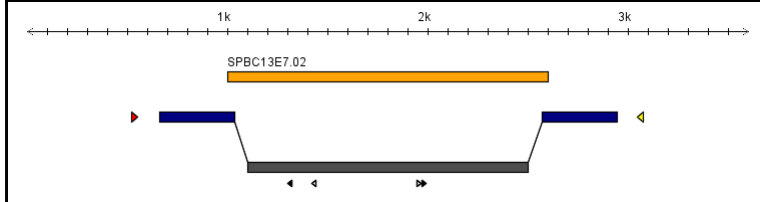

SPBC13E7.03c

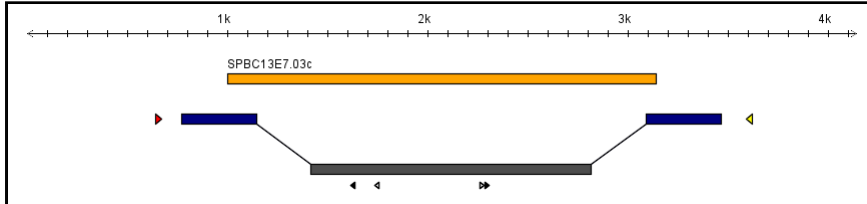

SPBC13E7.04

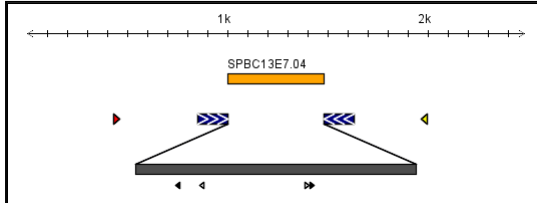

SPBC13E7.05

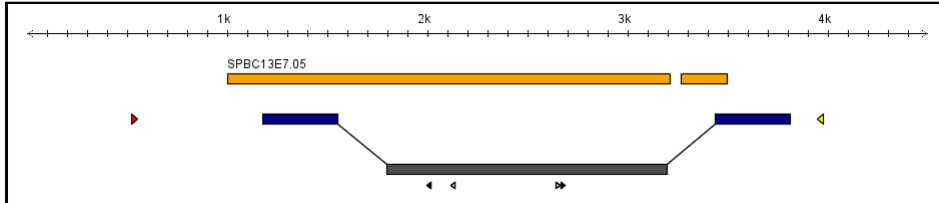

SPBC13E7.06

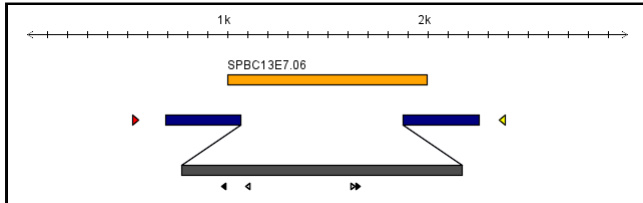

SPBC13E7.07

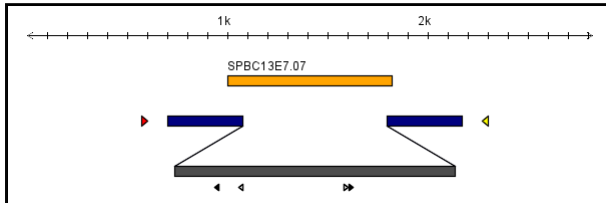

SPBC13E7.08c

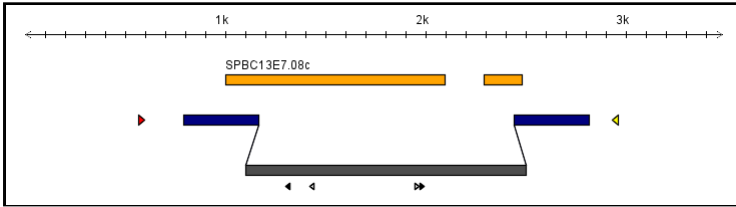

SPBC13E7.09

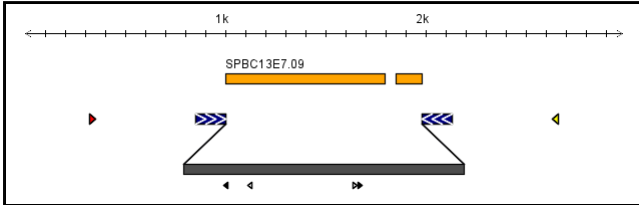

SPBC13E7.10c

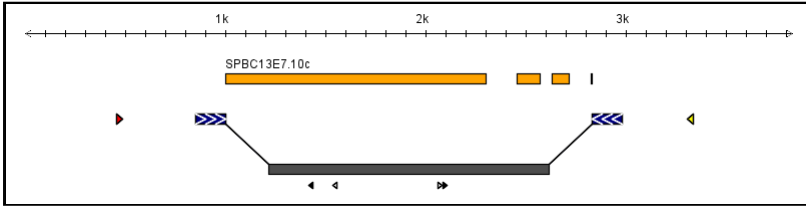

SPBC13E7.11

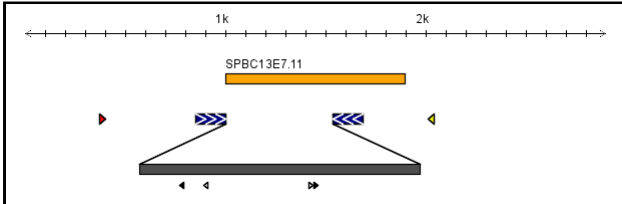

SPBC13G1.01c

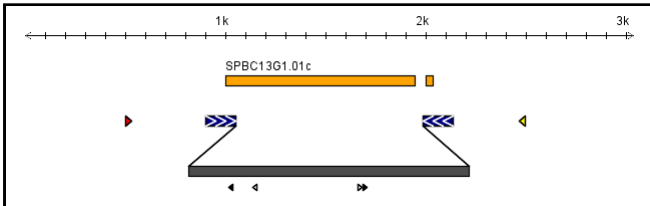

SPBC13G1.02

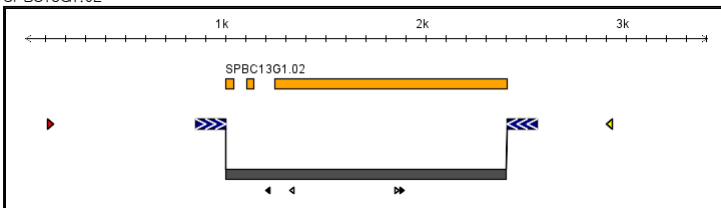

SPBC13G1.03c

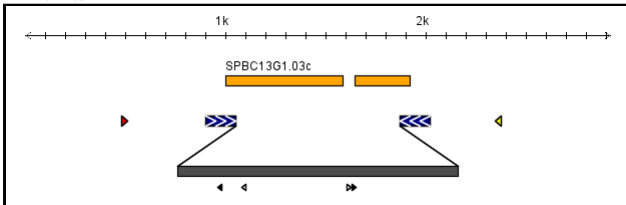

SPBC13G1.04c

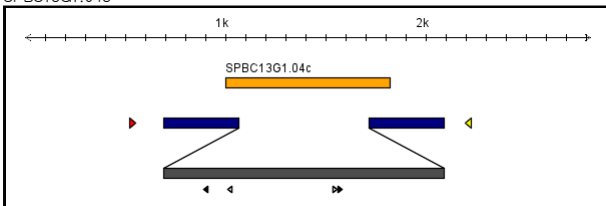

SPBC13G1.05

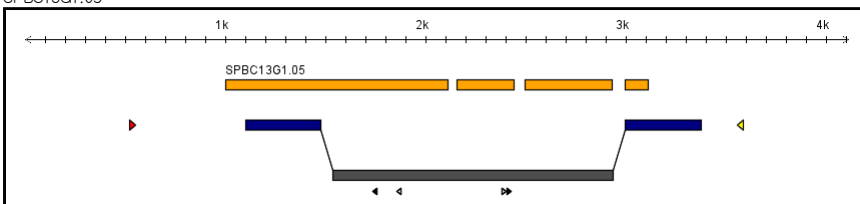

SPBC13G1.06c

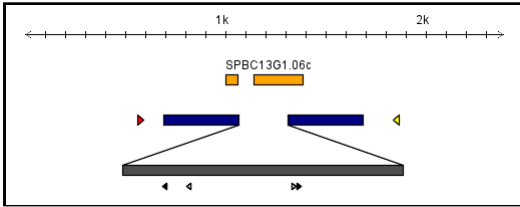

SPBC13G1.07

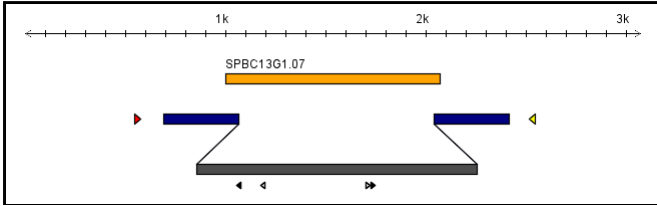

SPBC13G1.08c

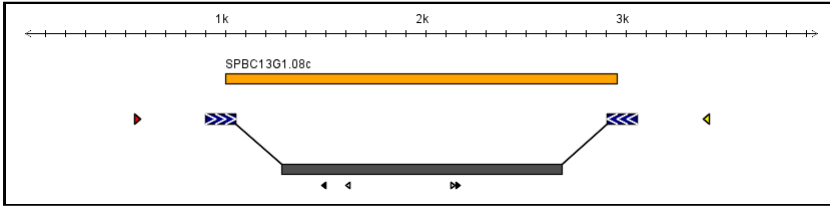

SPBC13G1.09

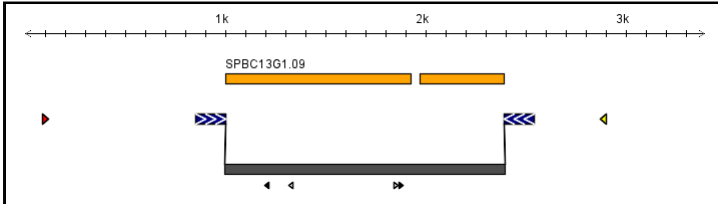

SPBC13G1.11

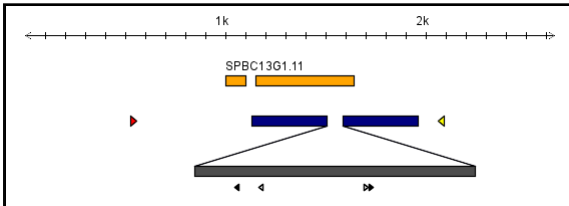

SPBC13G1.12

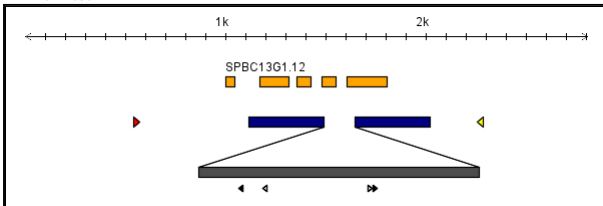

SPBC13G1.13

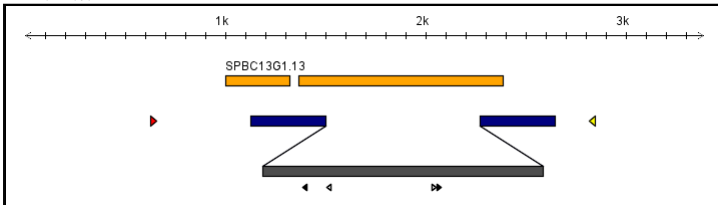

SPBC14C8.01c

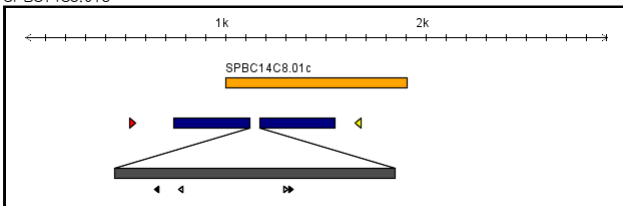

SPBC14C8.02

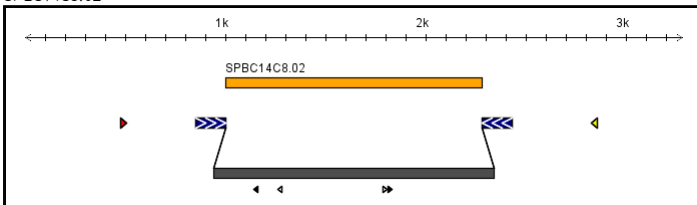

SPBC14C8.03

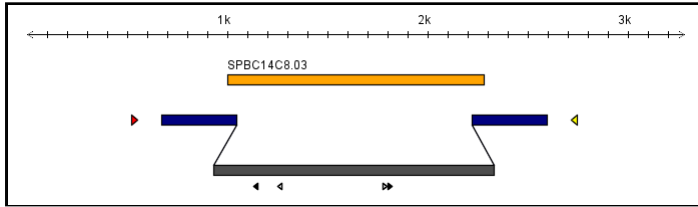

SPBC14C8.04

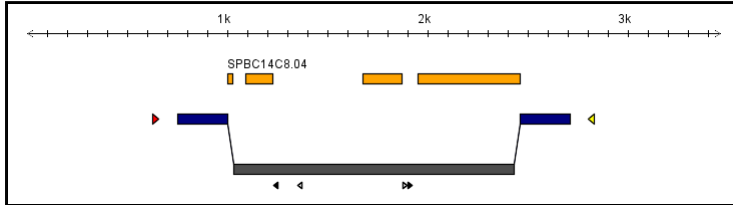

SPBC14C8.05c

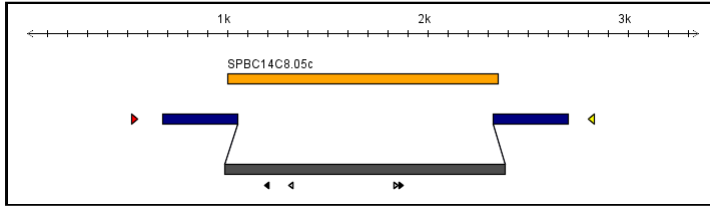

SPBC14C8.06

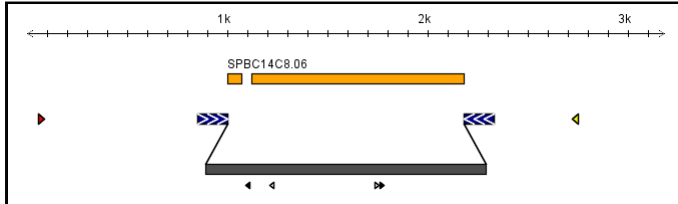

SPBC14C8.07c

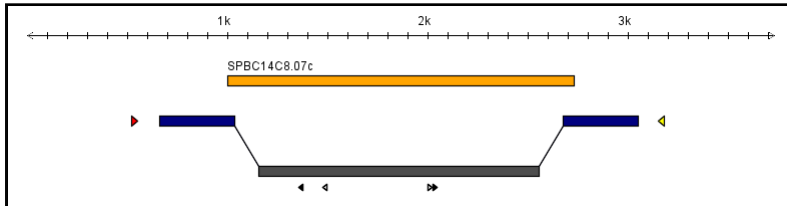

SPBC14C8.09c

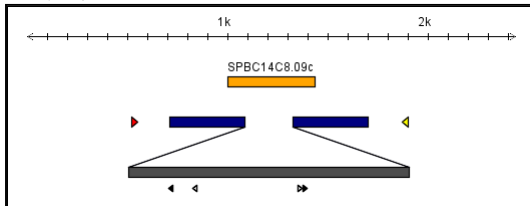

SPBC14C8.10

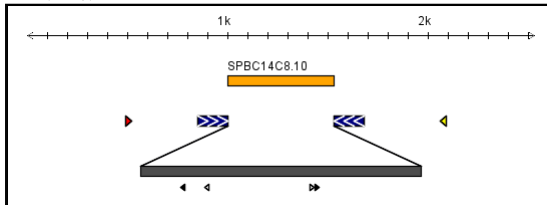

SPBC14C8.11c

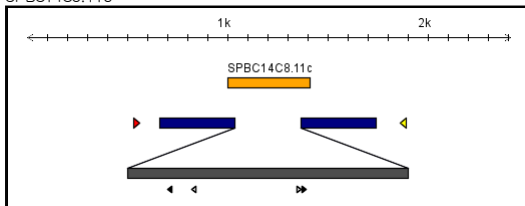

SPBC14C8.12

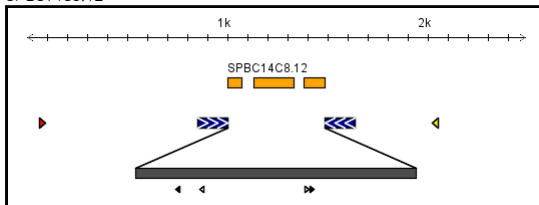

SPBC14C8.13

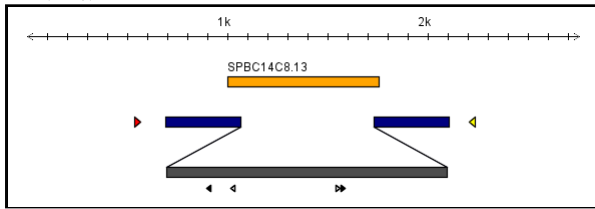

SPBC14C8.15

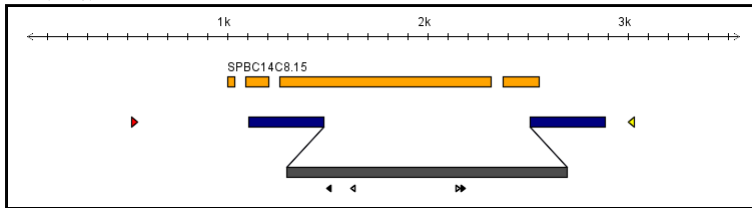

SPBC14C8.16c

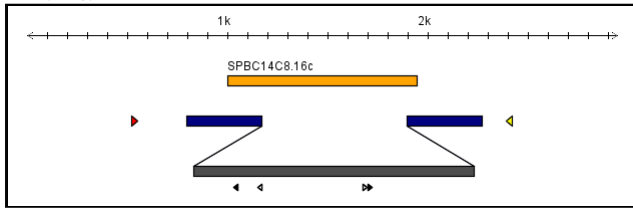

SPBC14C8.17c

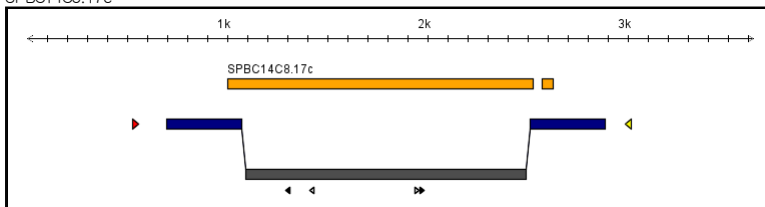

SPBC14F5.02

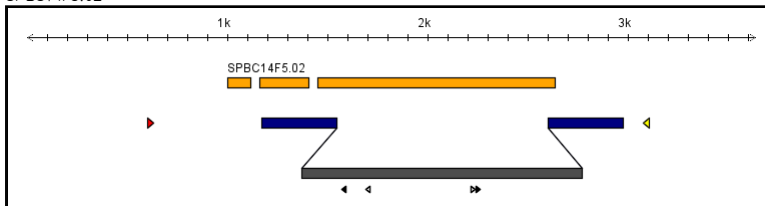

SPBC14F5.04c

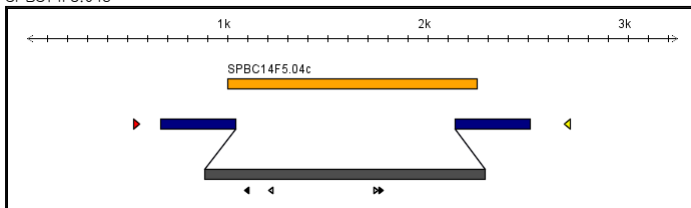

SPBC14F5.05c

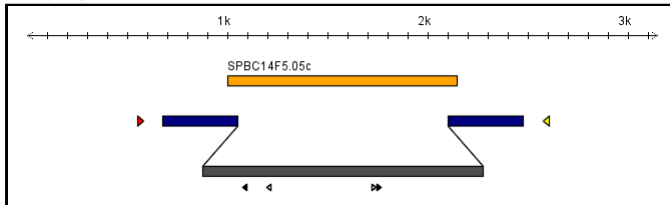

SPBC14F5.08

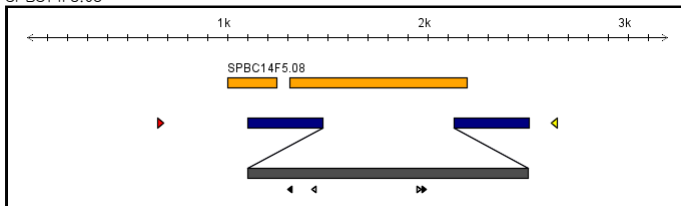

SPBC14F5.09c

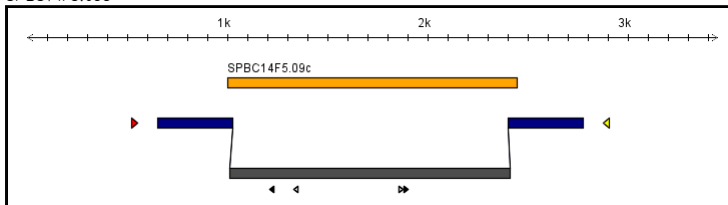



SPBC14F5.10c

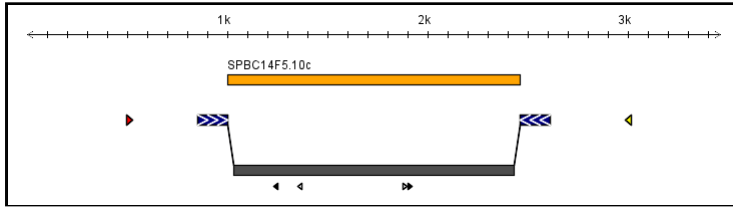

SPBC14F5.11c

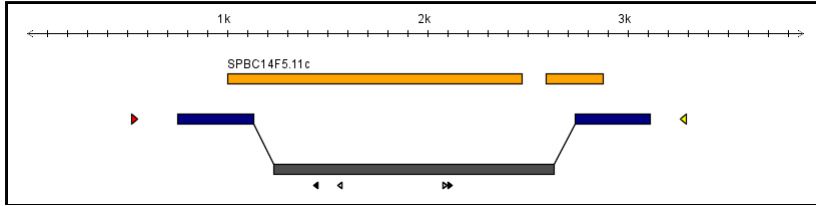

SPBC14F5.12c

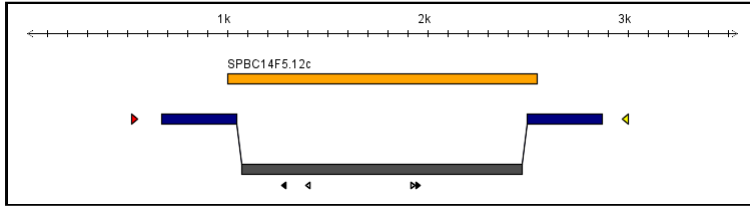

SPBC14F5.13c

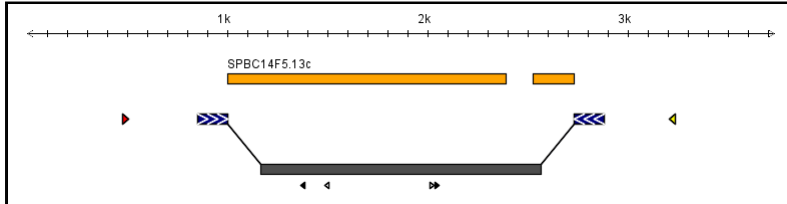

SPBC15C4.01c

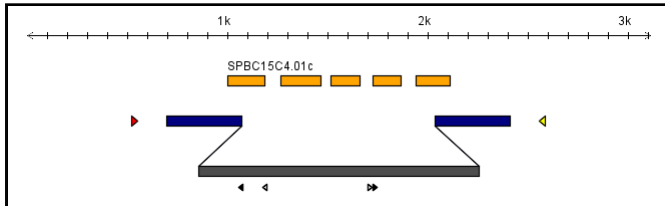

SPBC15C4.02

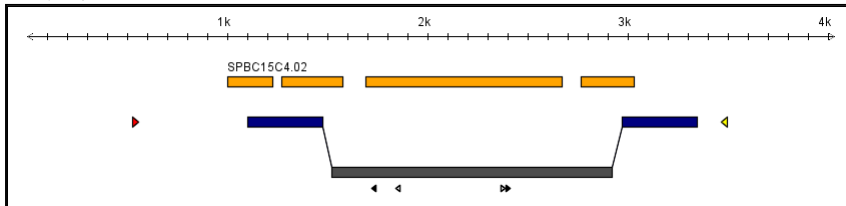

SPBC15C4.03

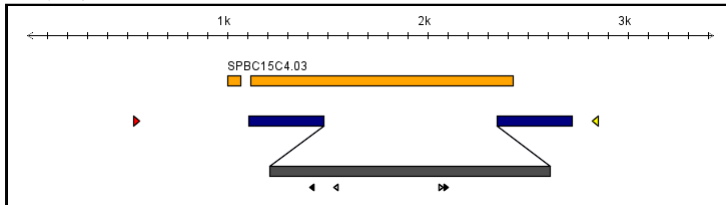

SPBC15C4.04c

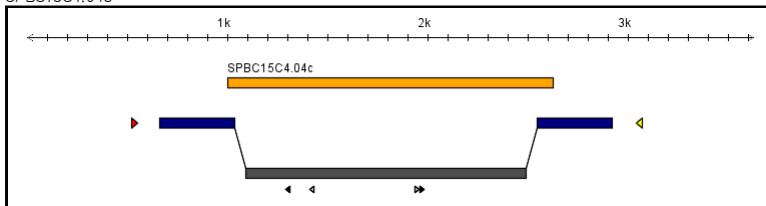

SPBC15C4.06c

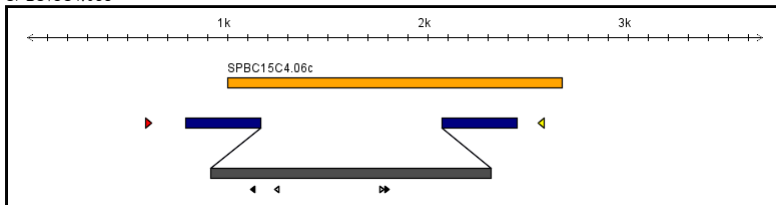

SPBC15D4.01c

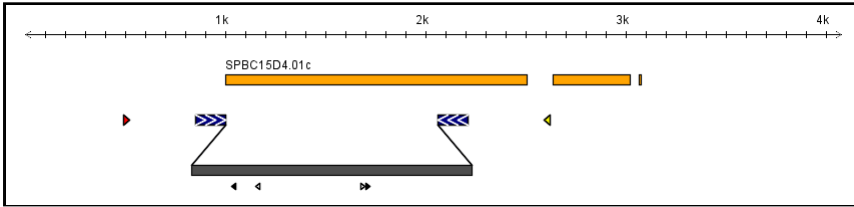

SPBC15D4.02

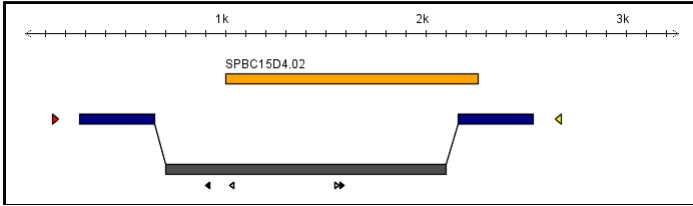

SPBC15D4.04

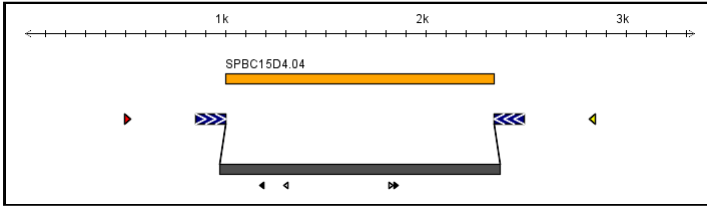

SPBC15D4.05

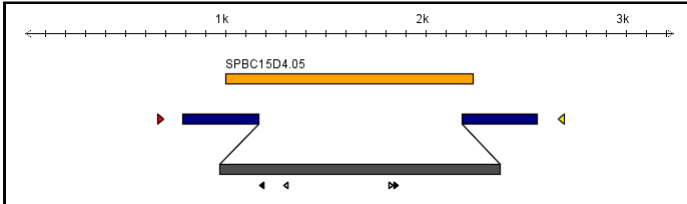

SPBC15D4.06

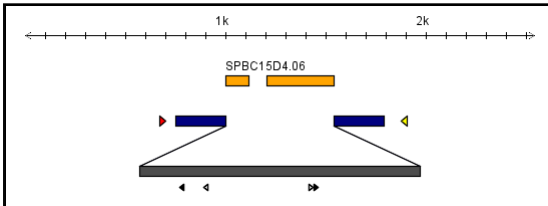

SPBC15D4.07c

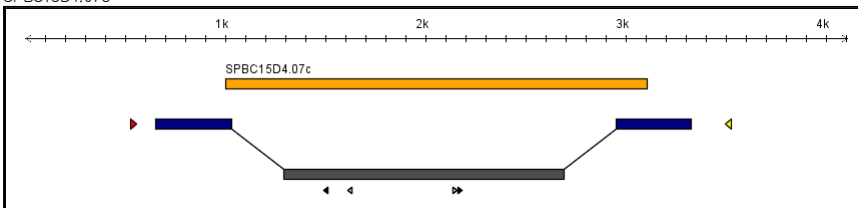

SPBC15D4.09c

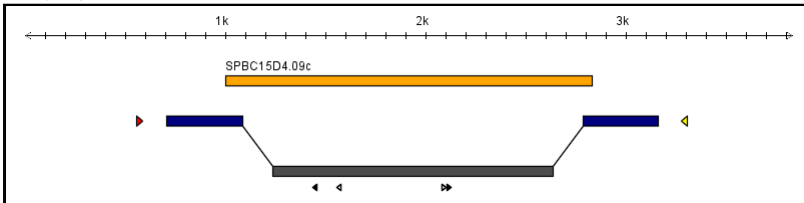

SPBC15D4.10c

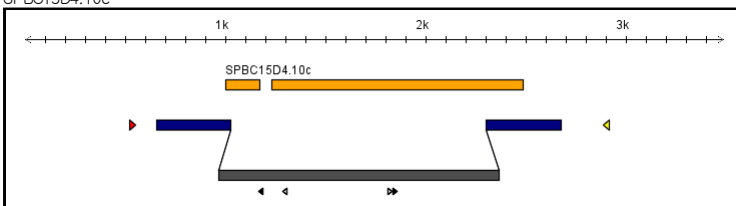

SPBC15D4.11c

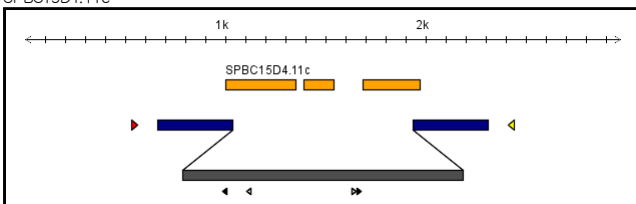

SPBC15D4.12c

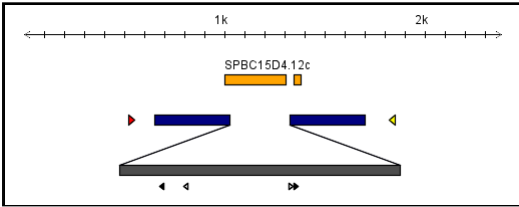

SPBC15D4.13c

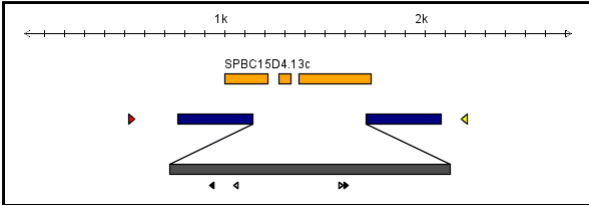

SPBC15D4.14

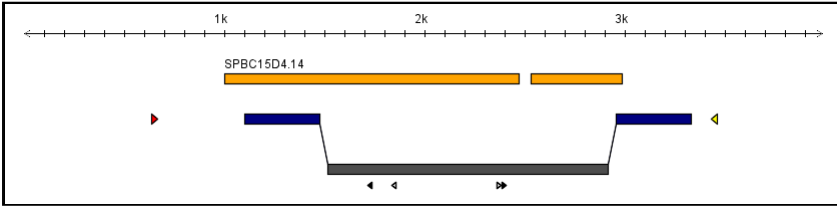

SPBC15D4.15

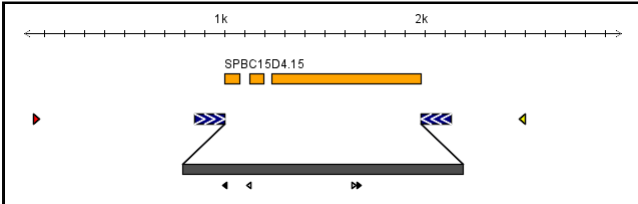

SPBC16A3.01

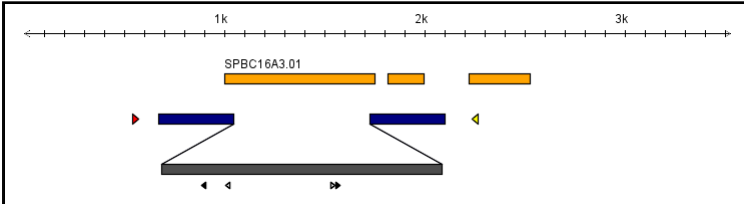

SPBC16A3.02c

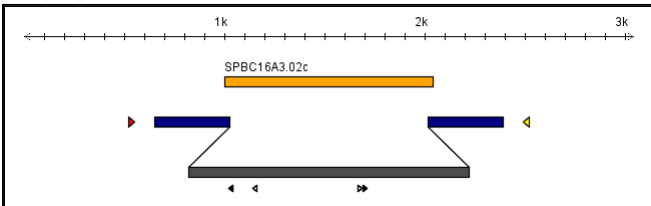

SPBC16A3.03c

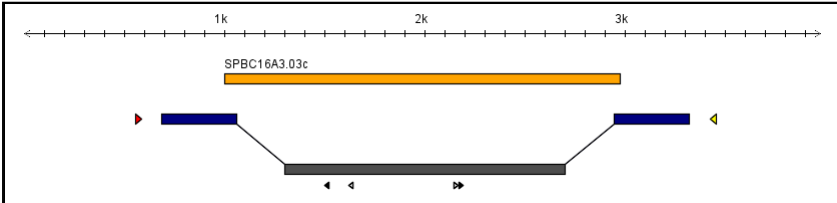

SPBC16A3.04

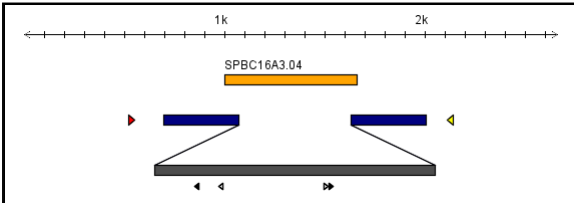

SPBC16A3.05c

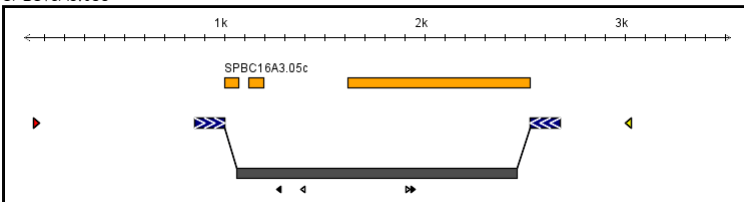

SPBC16A3.06

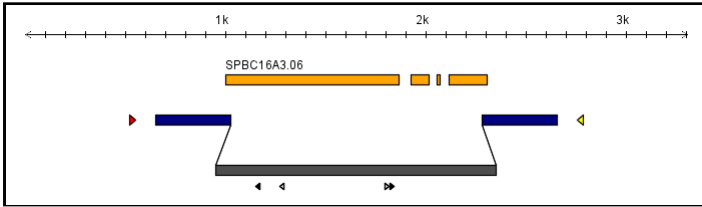

SPBC16A3.07c

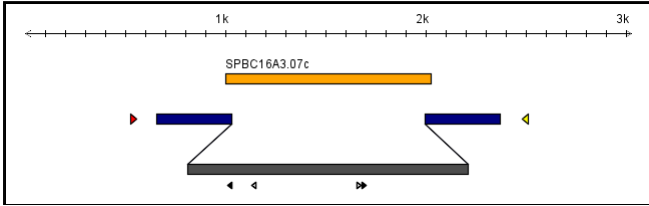

SPBC16A3.08c

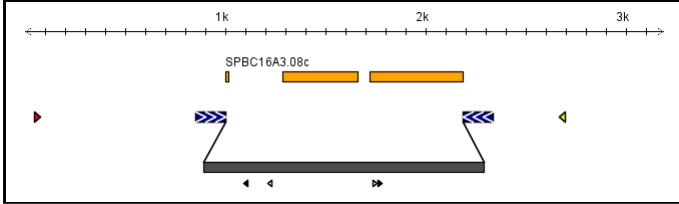

SPBC16A3.09c

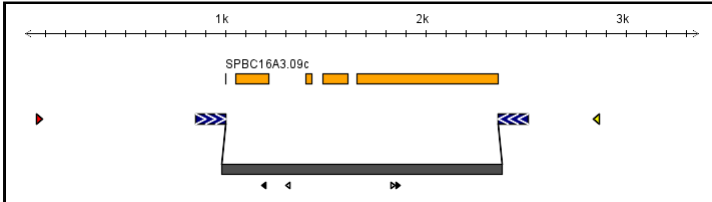

SPBC16A3.10

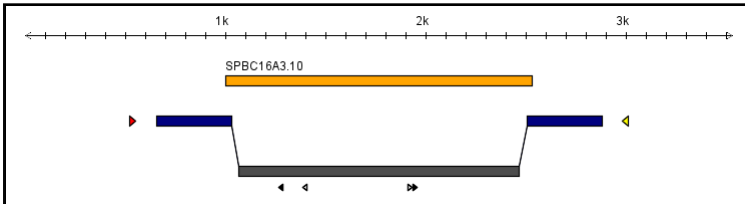

SPBC16A3.12c

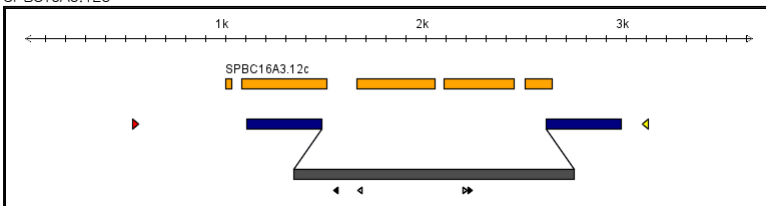

SPBC16A3.13

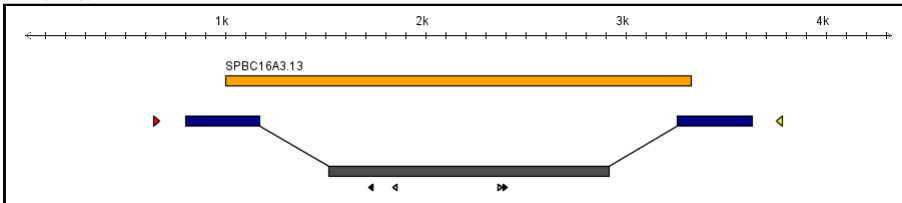

SPBC16A3.14

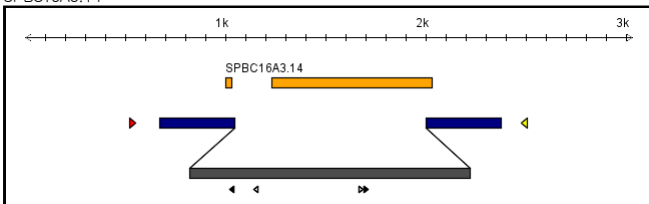

SPBC16A3.15c

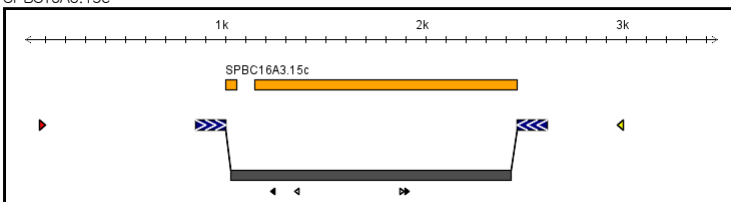

SPBC16A3.16

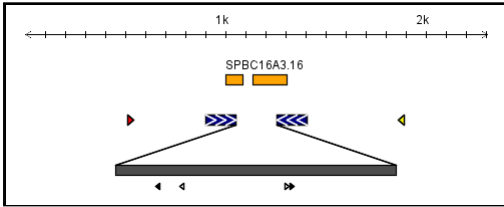

SPBC16A3.17c

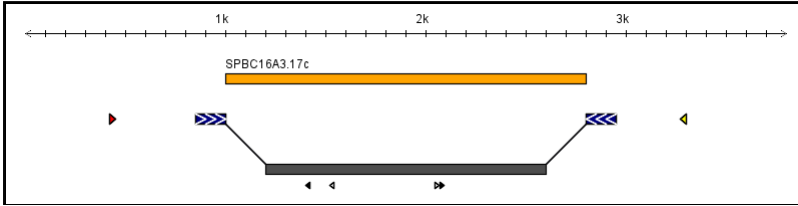

SPBC16A3.18

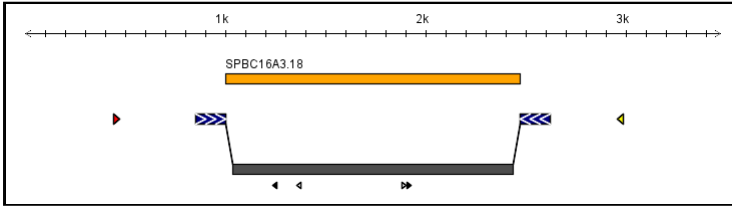

SPBC16A3.19

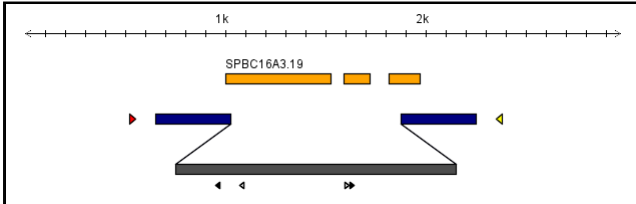

SPBC16C6.01c

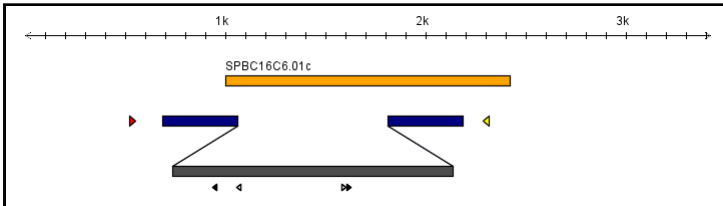

SPBC16C6.03c

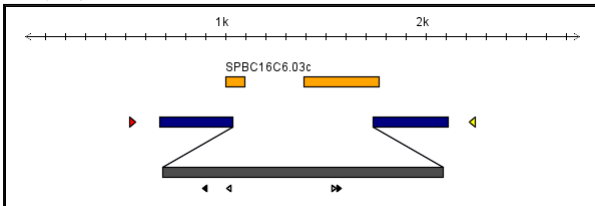

SPBC16C6.04

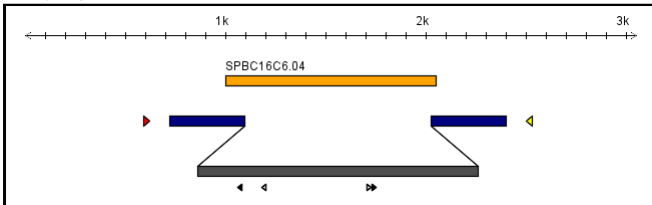

SPBC16C6.05

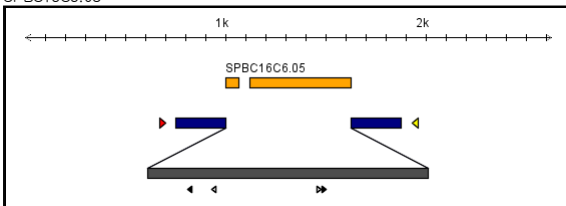

SPBC16C6.07c

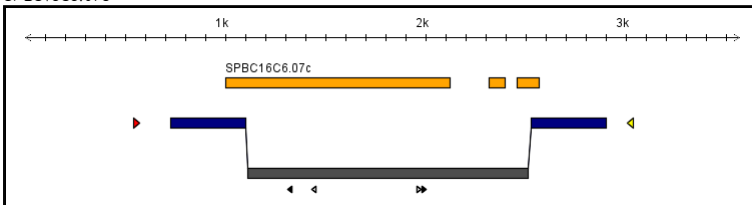

SPBC16C6.08c

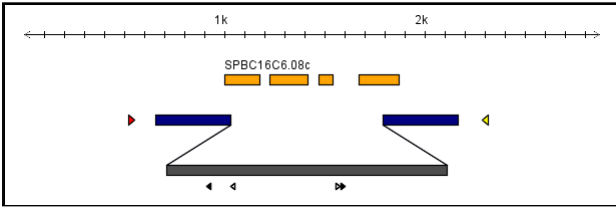

SPBC16C6.09

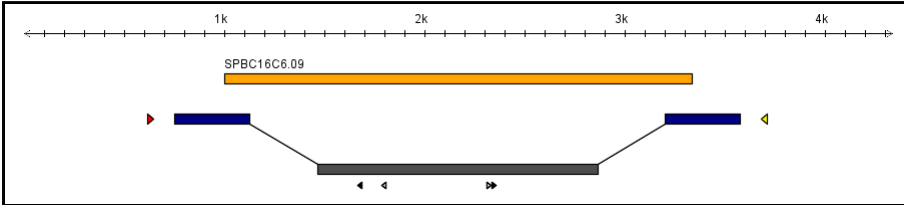

SPBC16C6.10

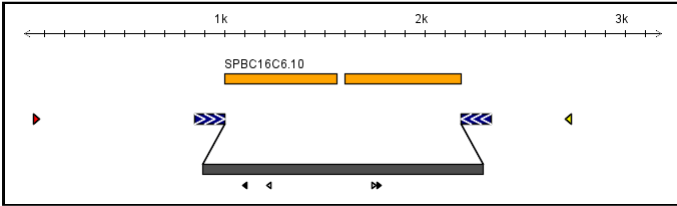

SPBC16C6.11

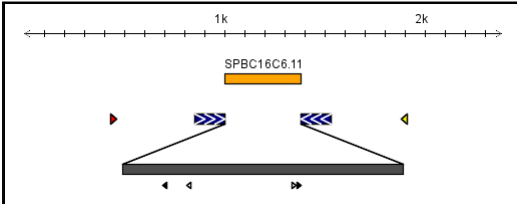

SPBC16C6.12c

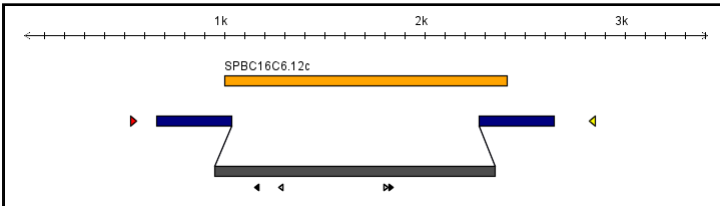

SPBC16C6.13c

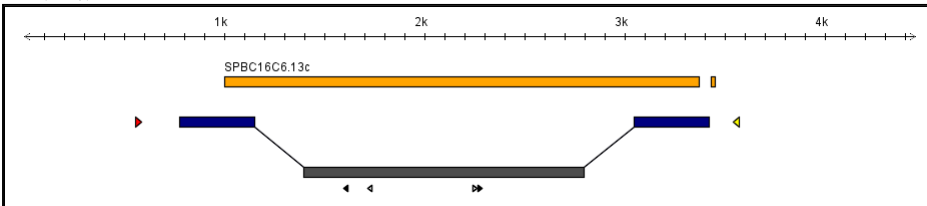

SPBC16D10.01c

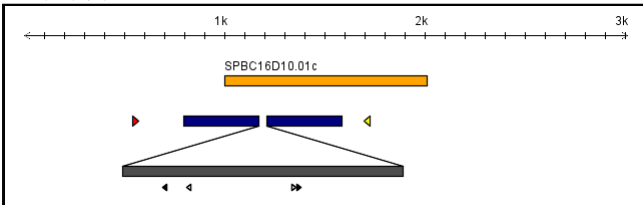

SPBC16D10.02

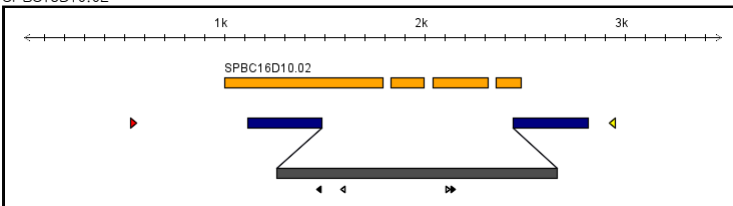

SPBC16D10.03

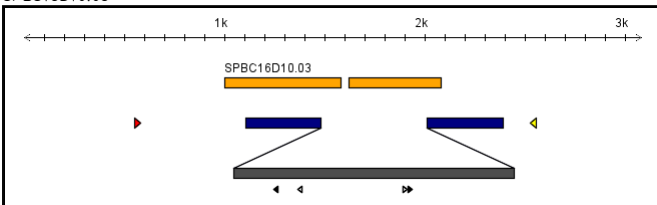

SPBC16D10.06

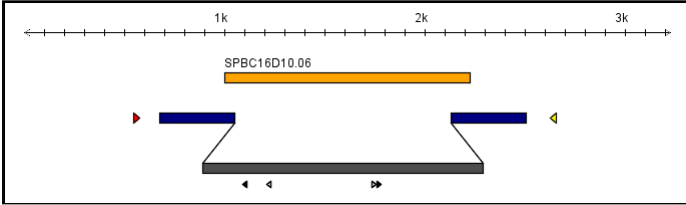

SPBC16D10.07c

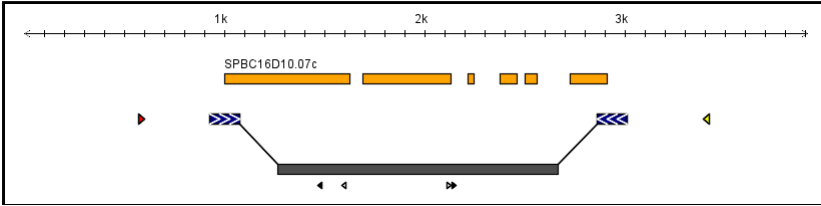

SPBC16D10.09

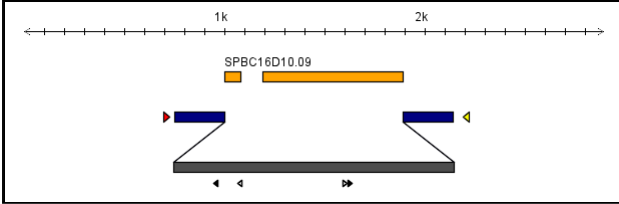

SPBC16D10.10

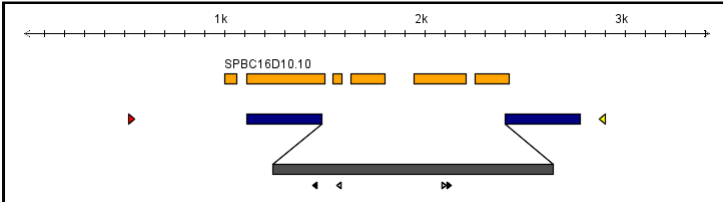

SPBC16D10.11c

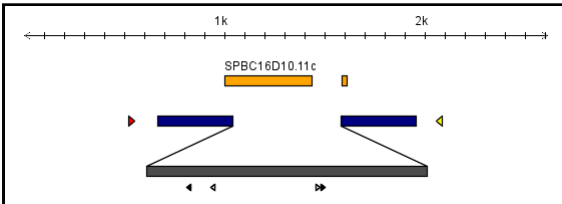

SPBC16E9.02c

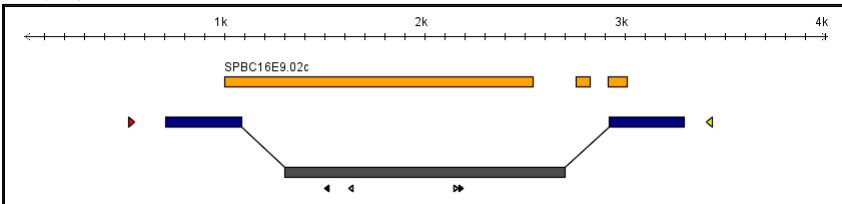

SPBC16E9.03c

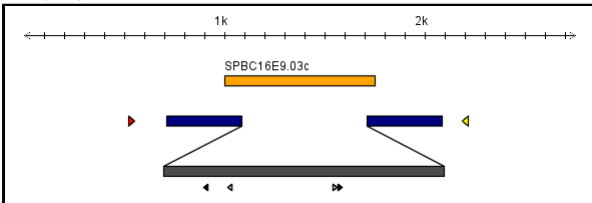

SPBC16E9.05

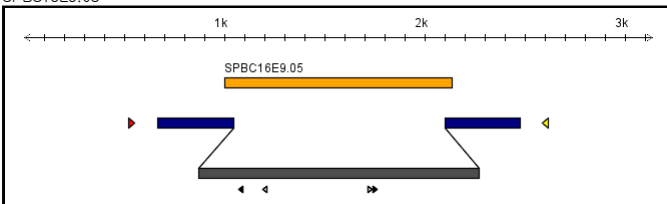

SPBC16E9.06c

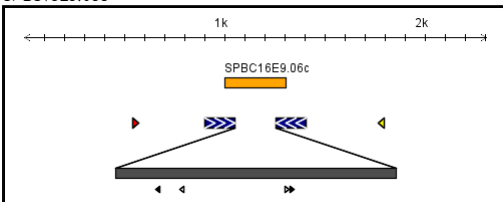

SPBC16E9.07

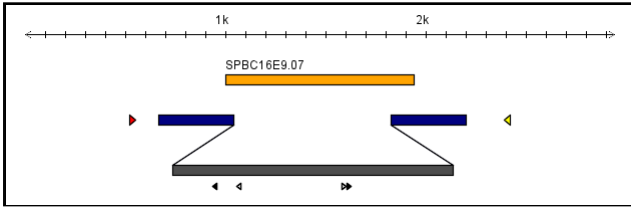

SPBC16E9.08

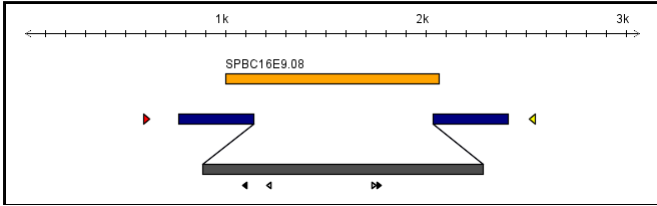

SPBC16E9.09c

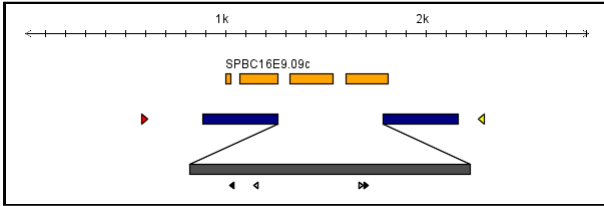

SPBC16E9.10c

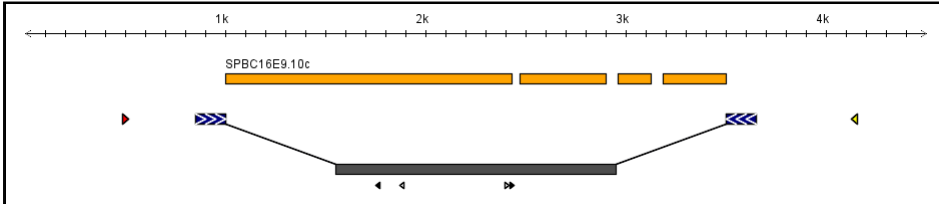

SPBC16E9.12c

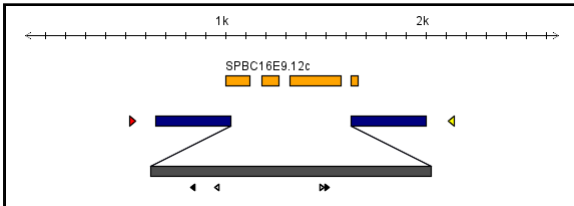

SPBC16E9.13

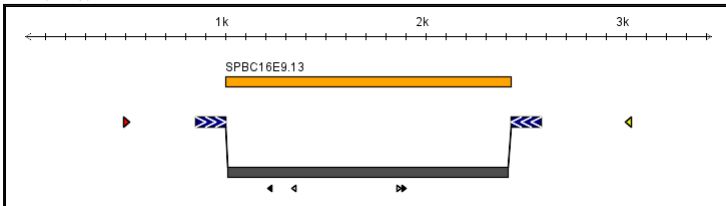

SPBC16E9.14c

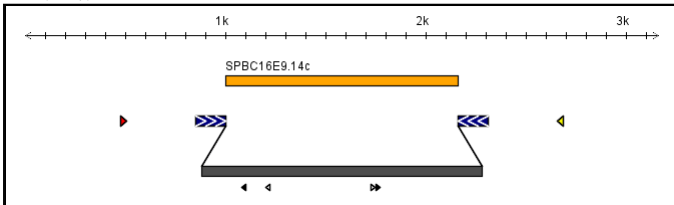

SPBC16E9.15

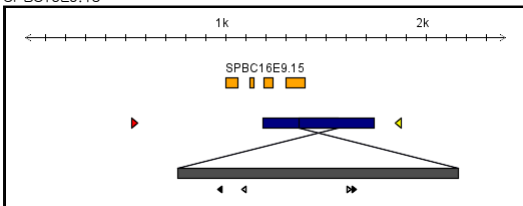

SPBC16E9.16c

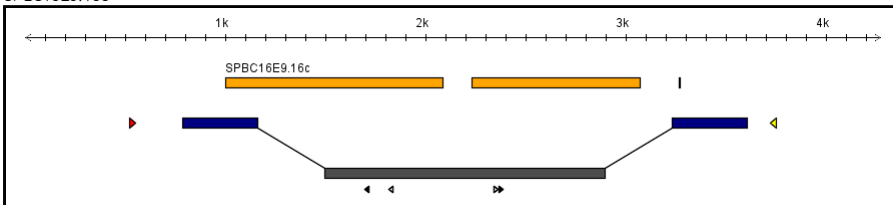



SPBC16E9.17c

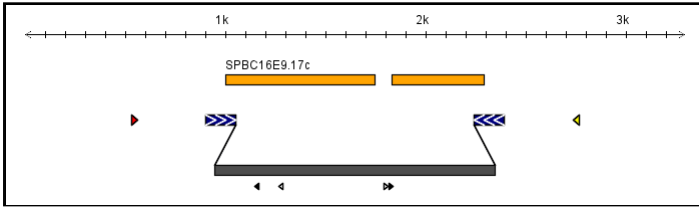

SPBC16E9.18

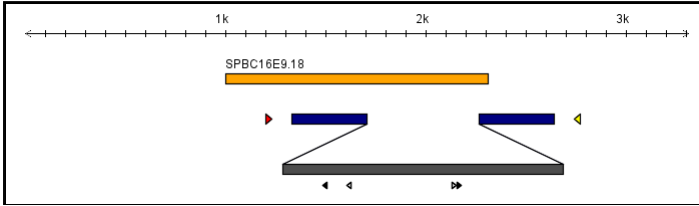

SPBC16E9.19

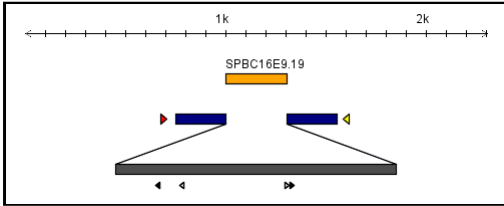

SPBC16G5.01

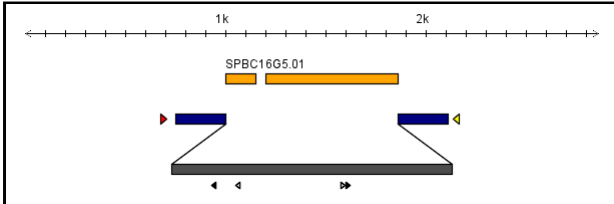

SPBC16G5.02c

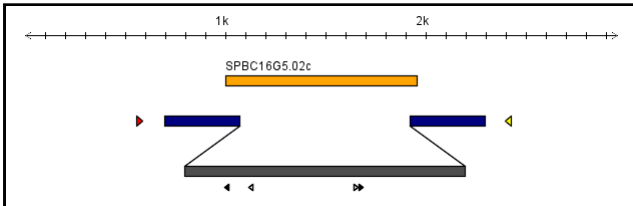

SPBC16G5.03

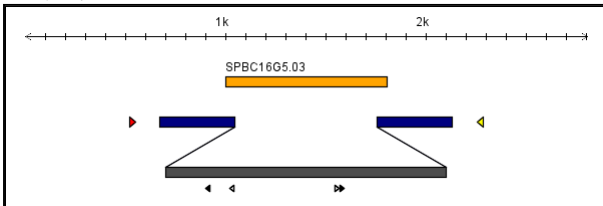

SPBC16G5.04

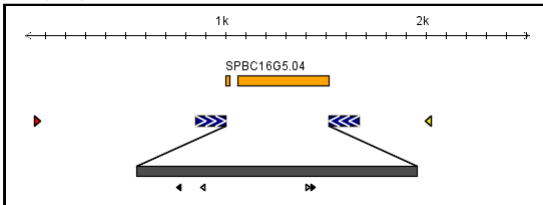

SPBC16G5.05c

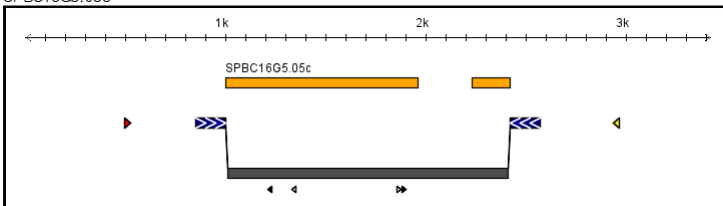

SPBC16G5.06

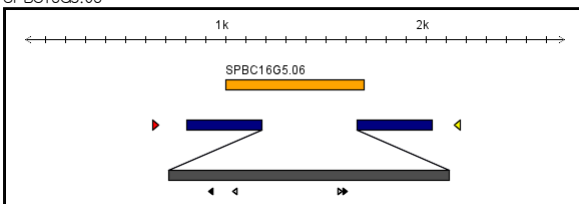

SPBC16G5.07c

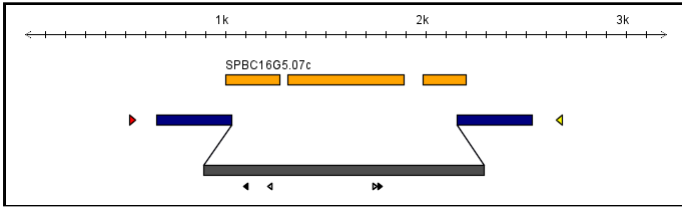

SPBC16G5.08

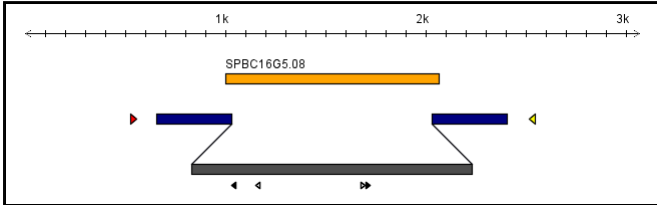

SPBC16G5.09

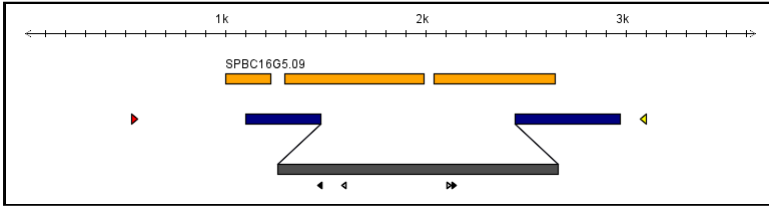

SPBC16G5.10

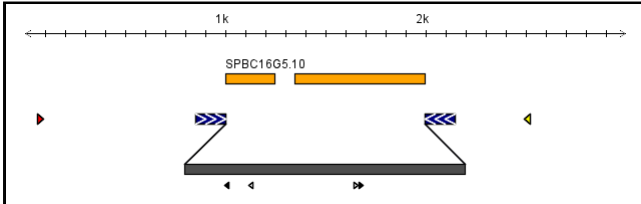

SPBC16G5.11c

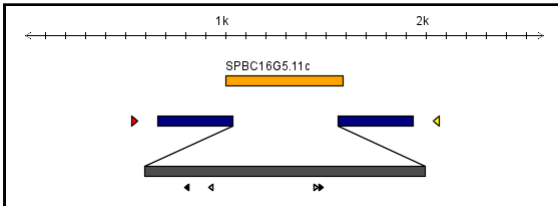

SPBC16G5.12c

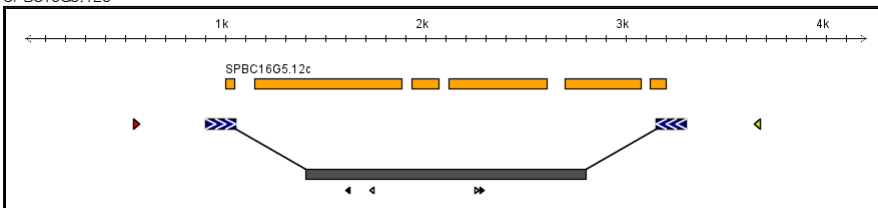

SPBC16G5.13

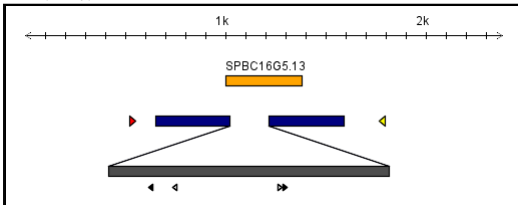

SPBC16G5.14c

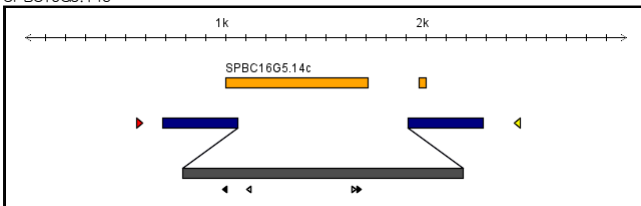

SPBC16G5.15c

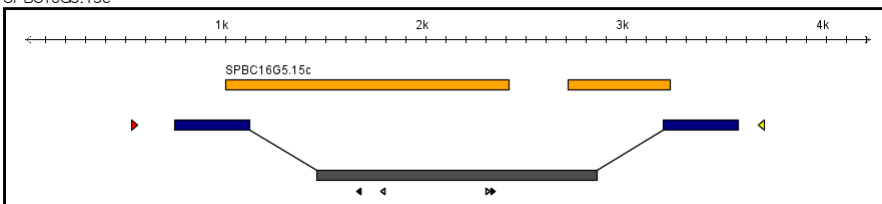

SPBC16G5.17

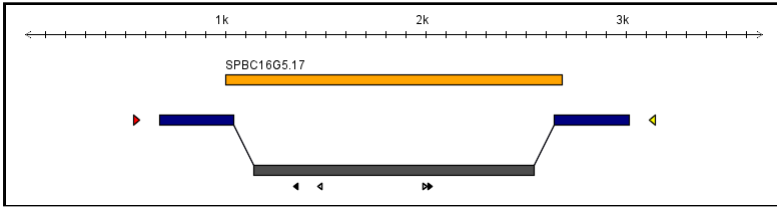

SPBC16G5.18

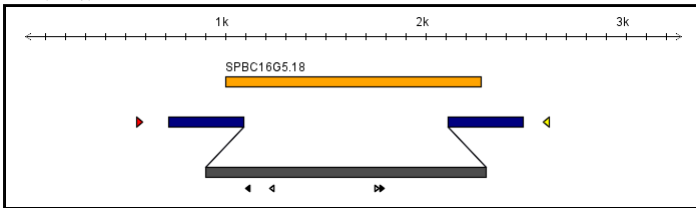

SPBC16H5.04

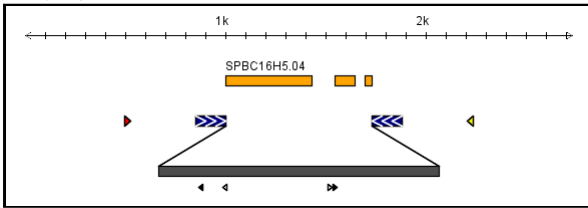

SPBC16H5.05c

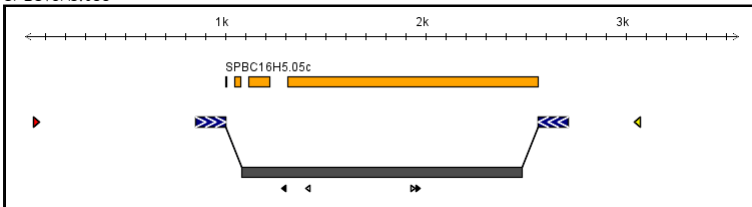

SPBC16H5.06

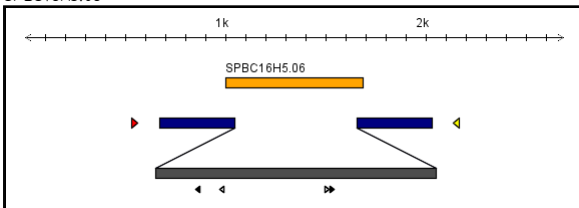

SPBC16H5.07c

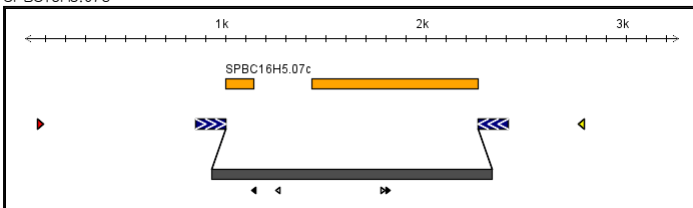

SPBC16H5.08c

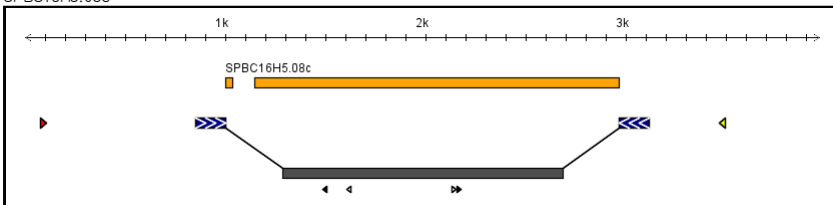

SPBC16H5.09c

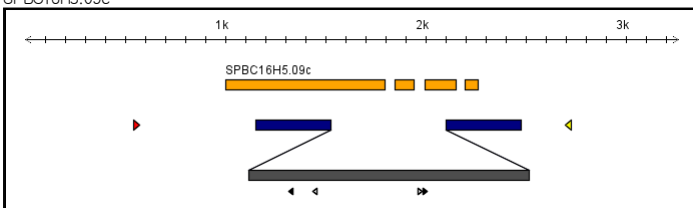

SPBC16H5.10c

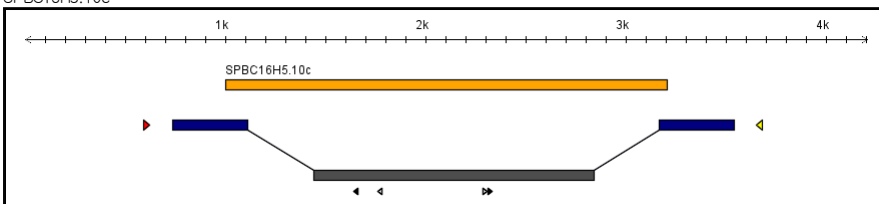

SPBC16H5.11c

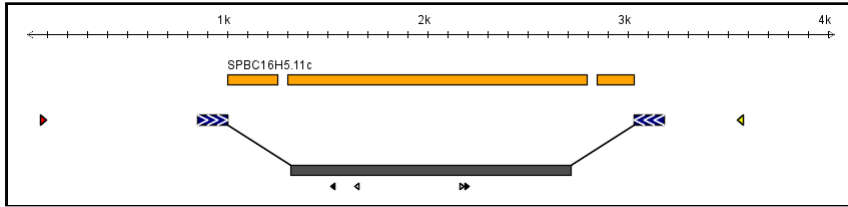

SPBC16H5.12c

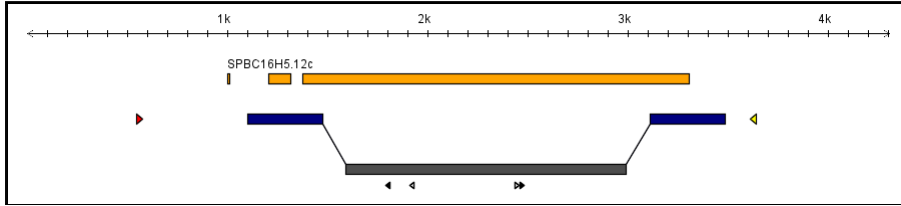

SPBC16H5.13

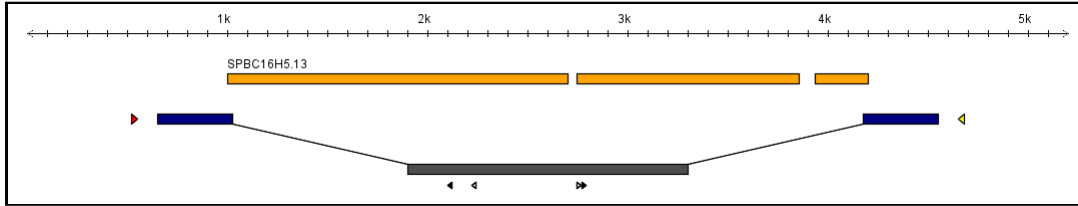

SPBC16H5.15

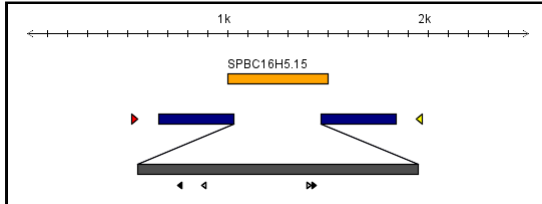

SPBC17A3.01c

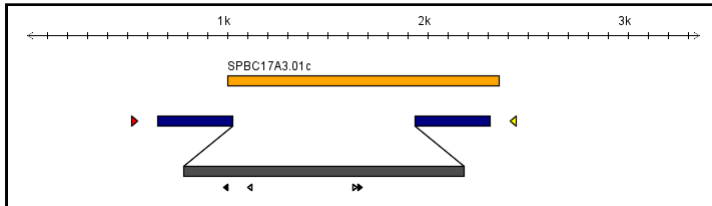

SPBC17A3.03c

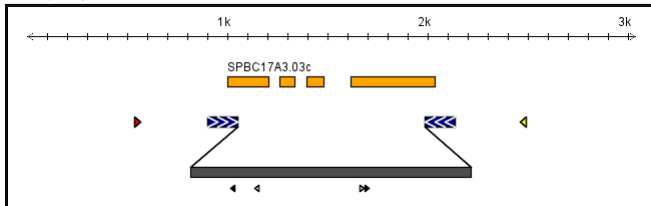

SPBC17A3.04c

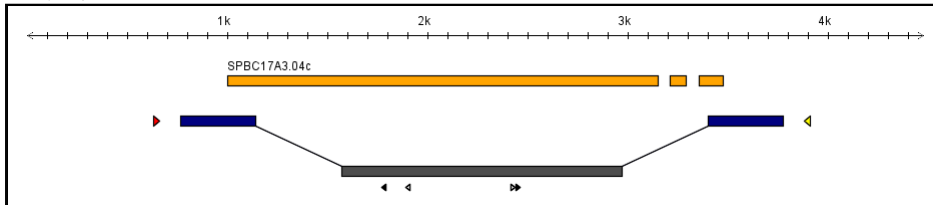

SPBC17A3.05c

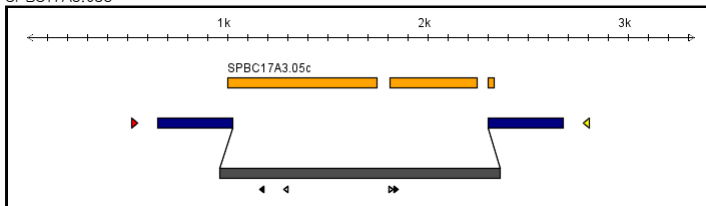

SPBC17A3.06

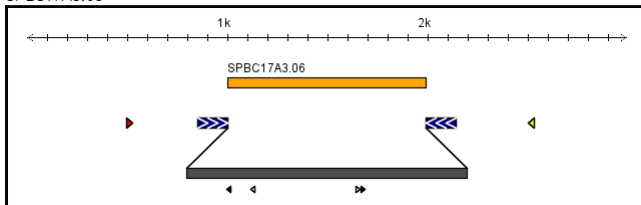

SPBC17A3.07

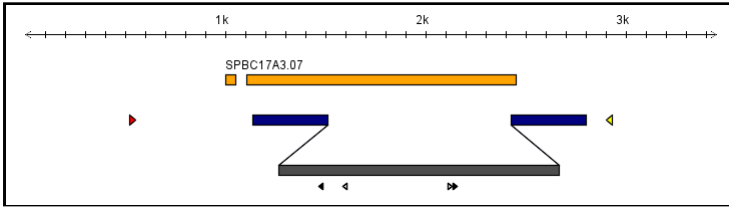

SPBC17A3.08

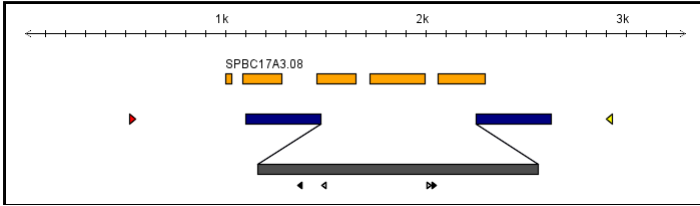

SPBC17A3.09c

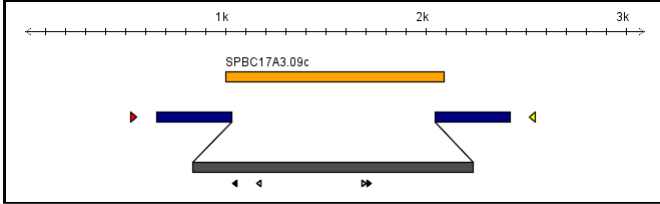

SPBC17A3.10

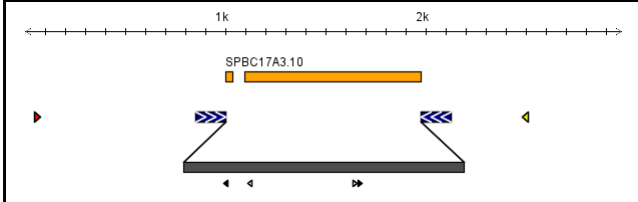

SPBC17D1.01

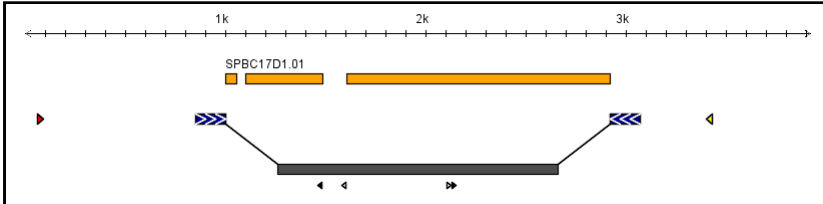

SPBC17D1.02

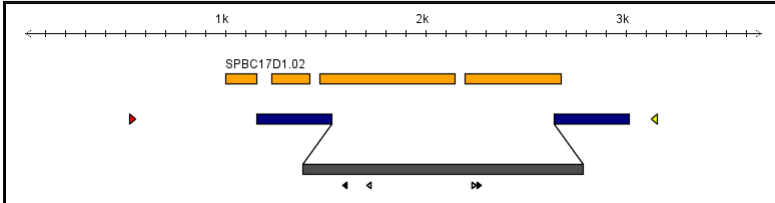

SPBC17D1.03c

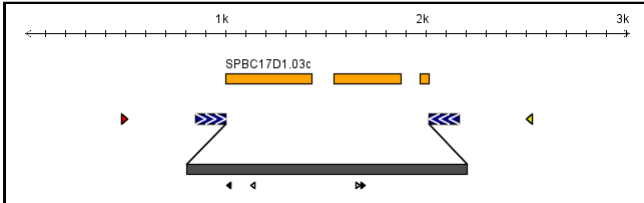

SPBC17D1.04

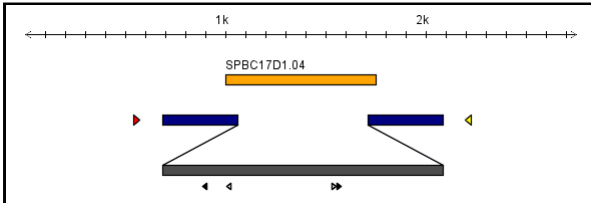

SPBC17D1.05

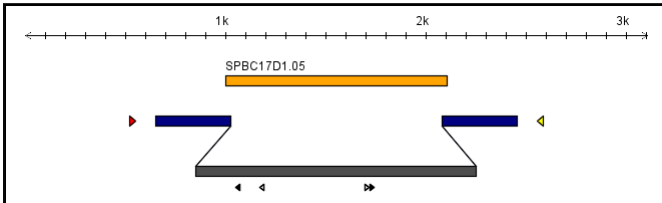

SPBC17D1.06

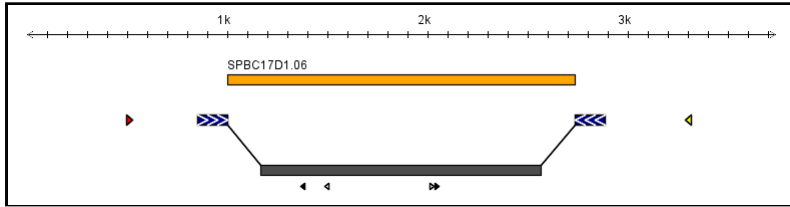

SPBC17D11.01

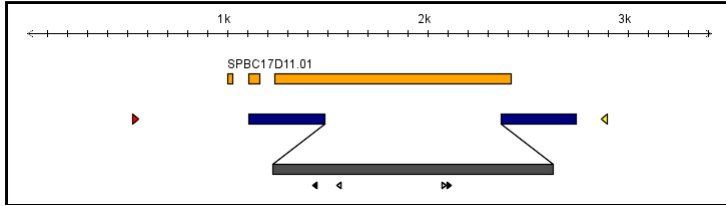

SPBC17D11.02c

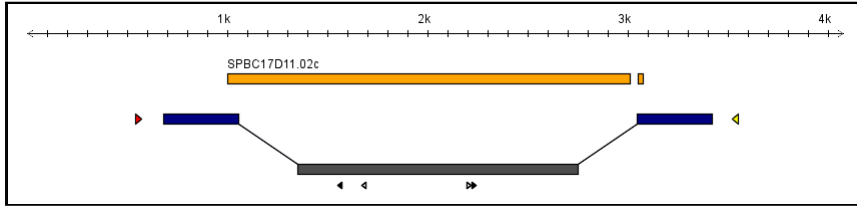

SPBC17D11.03c

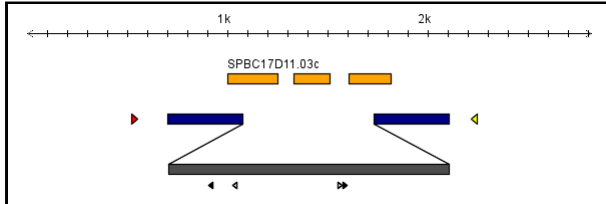

SPBC17D11.04c

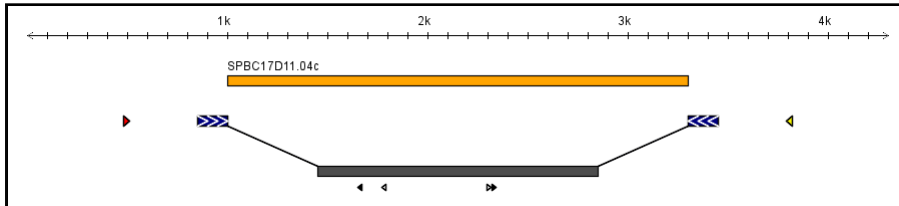

SPBC17D11.05

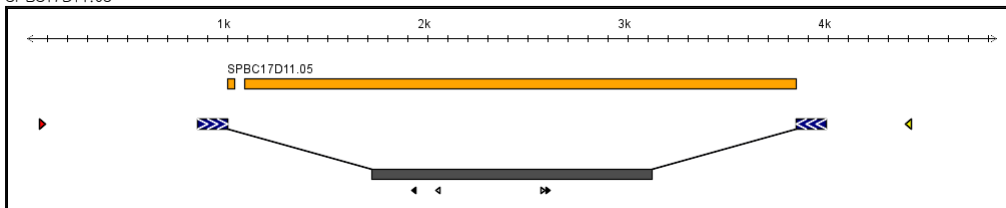

SPBC17D11.06

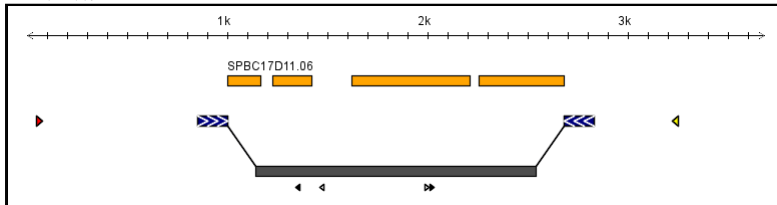

SPBC17D11.08

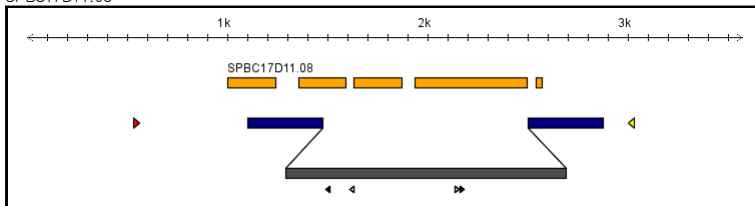

SPBC17F3.01c

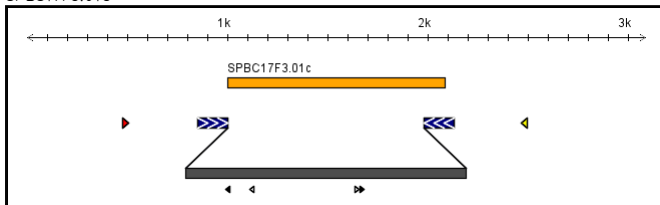

SPBC17G9.02c

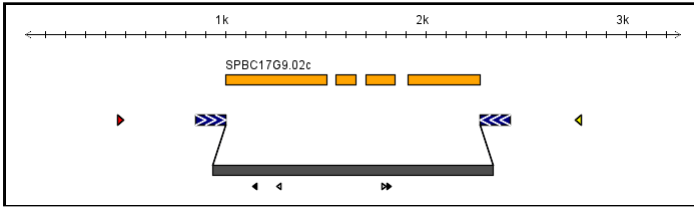

SPBC17G9.03c

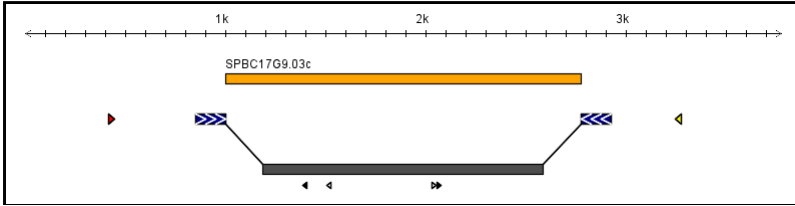

SPBC17G9.04c

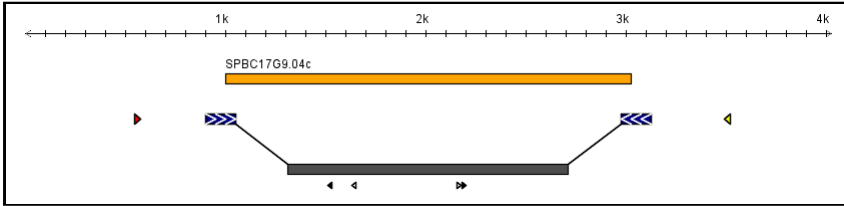

SPBC17G9.05

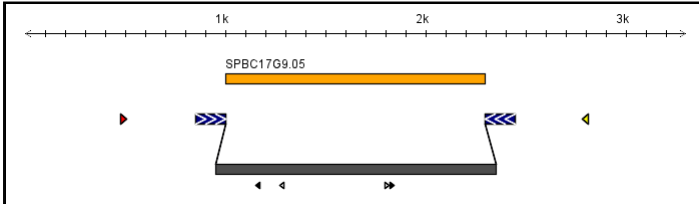

SPBC17G9.07

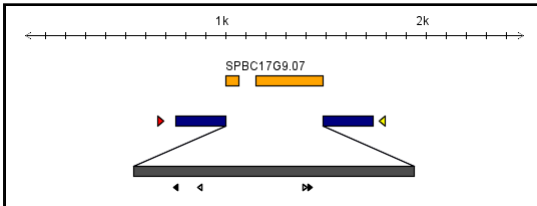

SPBC17G9.08c

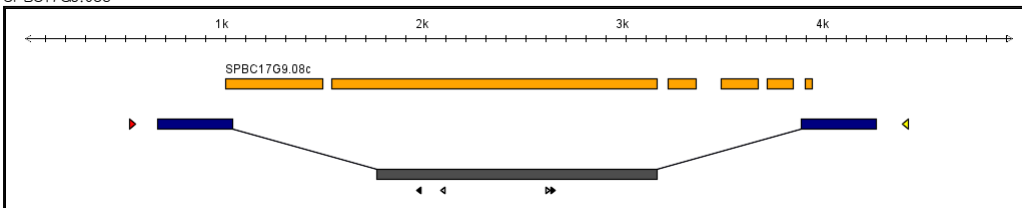

SPBC17G9.09

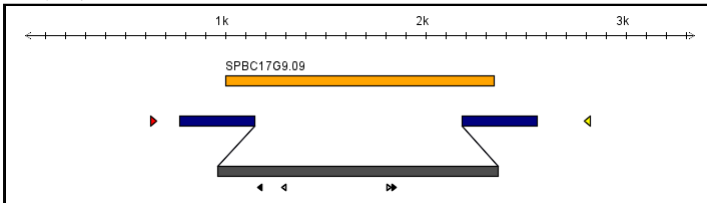

SPBC17G9.10

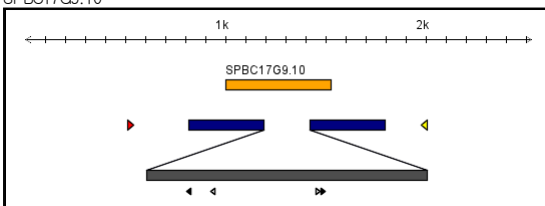

SPBC17G9.12c

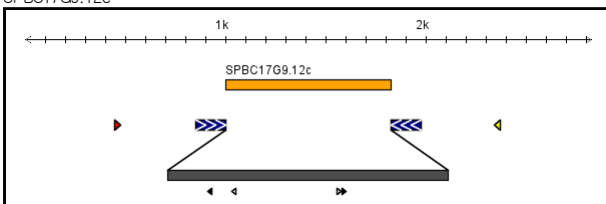

SPBC17G9.13c

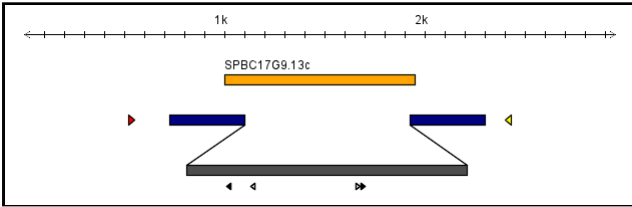

SPBC18A7.02c

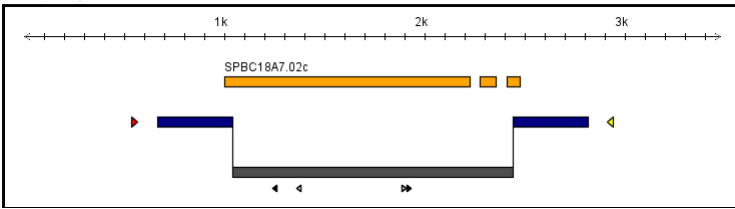

SPBC18E5.01

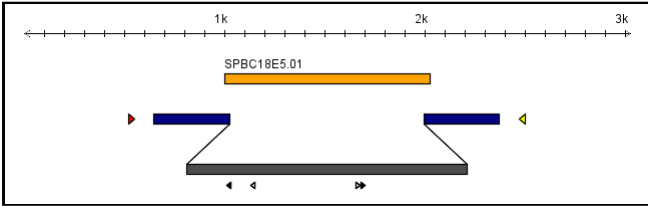

SPBC18E5.02c

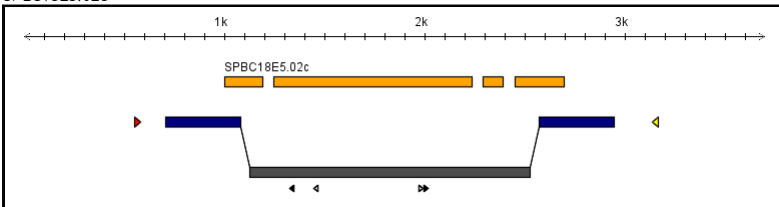

SPBC18E5.03c

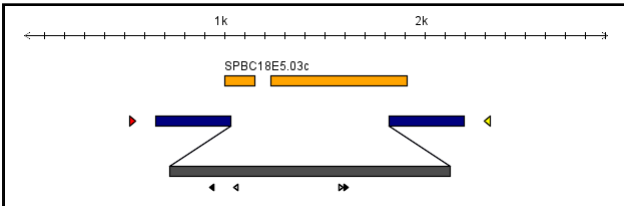

SPBC18E5.04

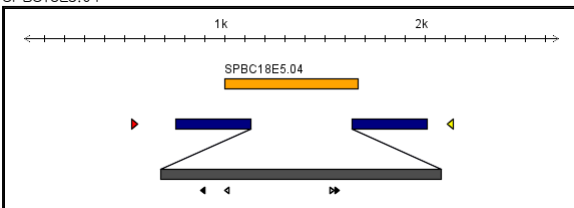

SPBC18E5.05c

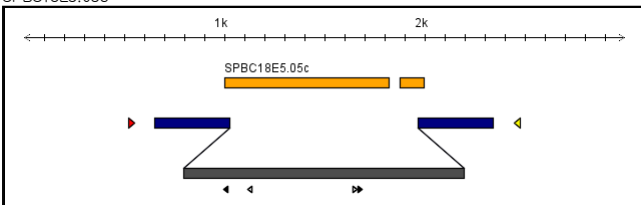

SPBC18E5.06

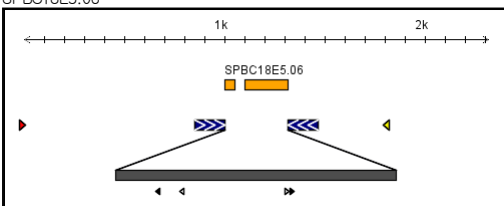

SPBC18E5.07

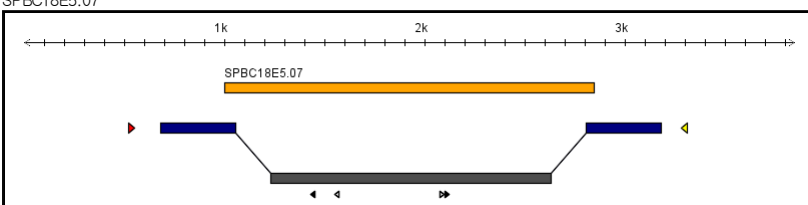



SPBC18E5.08

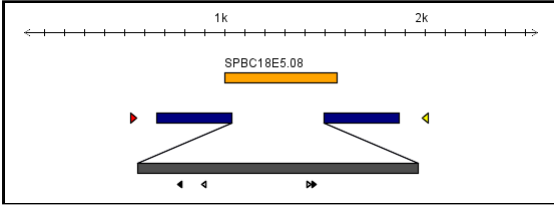

SPBC18E5.09c

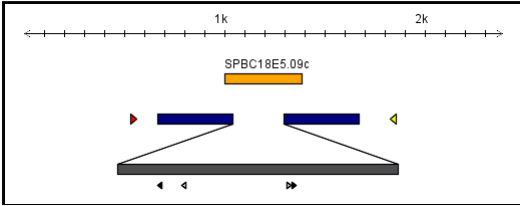

SPBC18E5.10

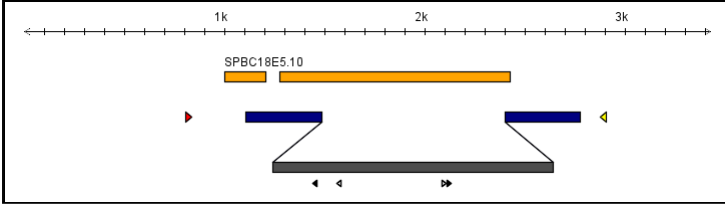

SPBC18E5.11c

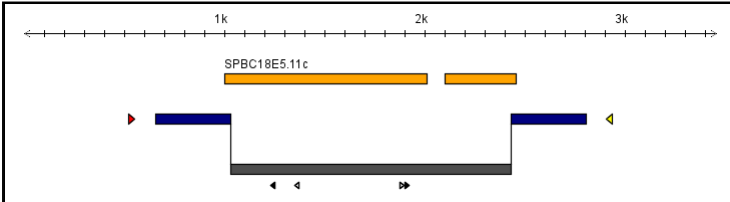

SPBC18E5.12c

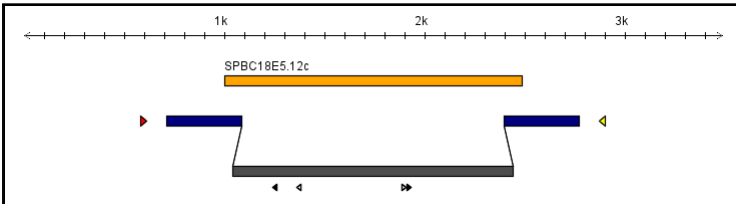

SPBC18E5.13

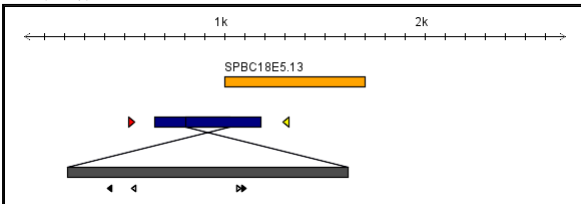

SPBC18E5.14c

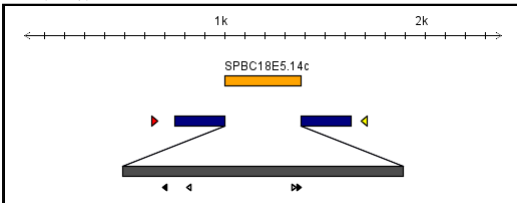

SPBC18H10.02

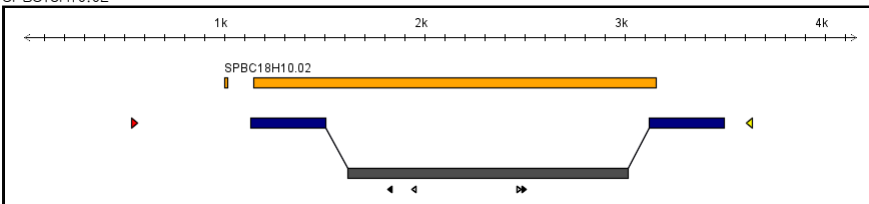

SPBC18H10.03

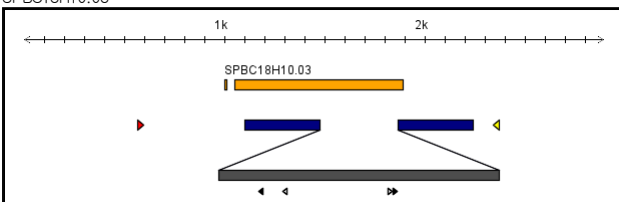

SPBC18H10.04c

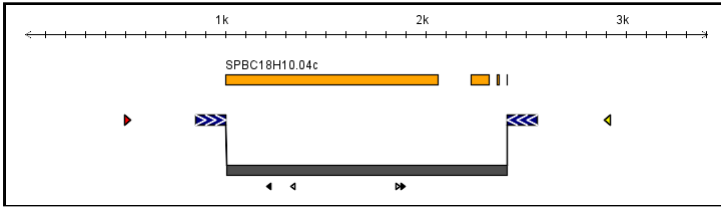

SPBC18H10.05

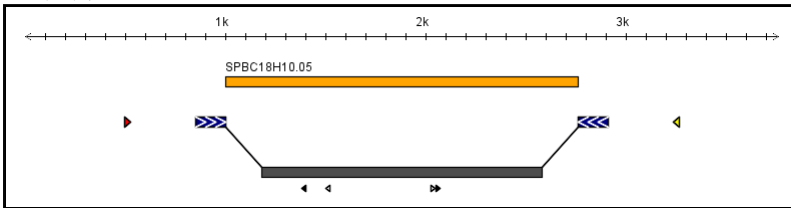

SPBC18H10.06c

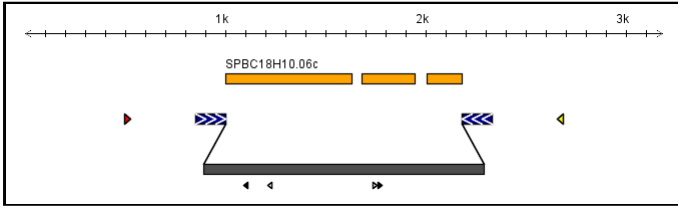

SPBC18H10.07

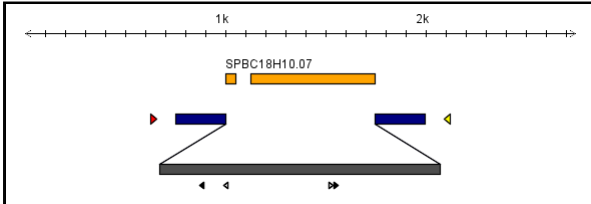

SPBC18H10.08c

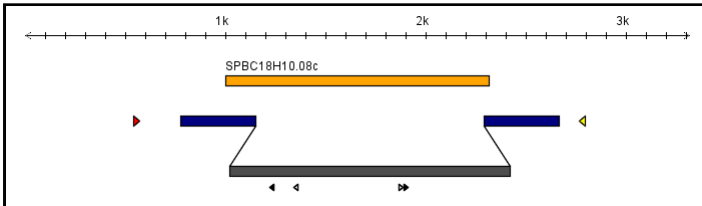

SPBC18H10.09

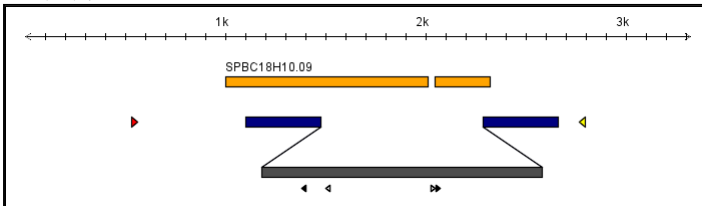

SPBC18H10.10c

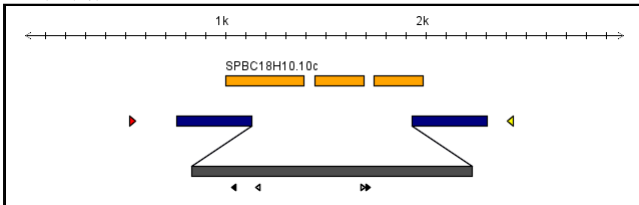

SPBC18H10.11c

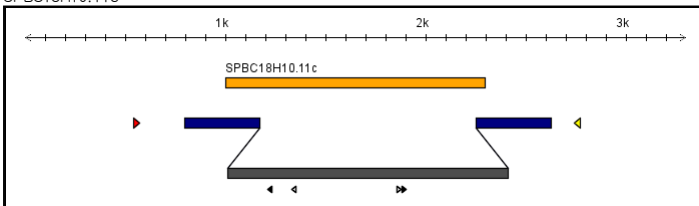

SPBC18H10.12c

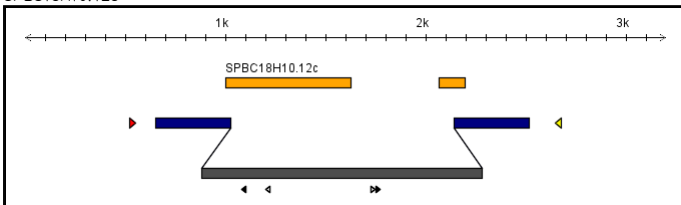

SPBC18H10.13

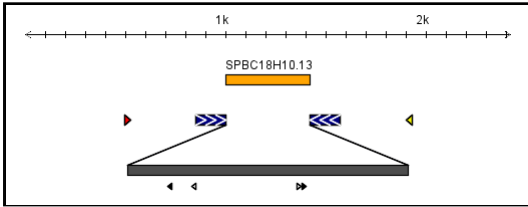

SPBC18H10.14

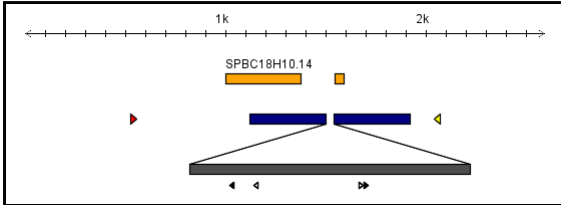

SPBC18H10.15

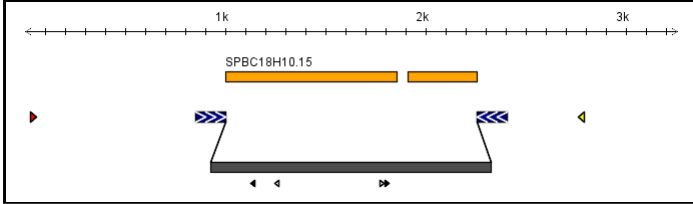

SPBC18H10.17c

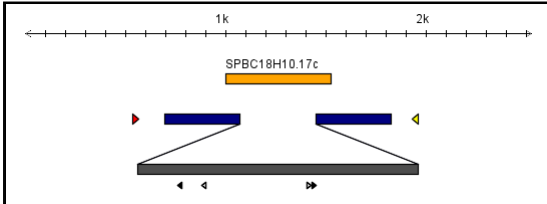

SPBC18H10.18c

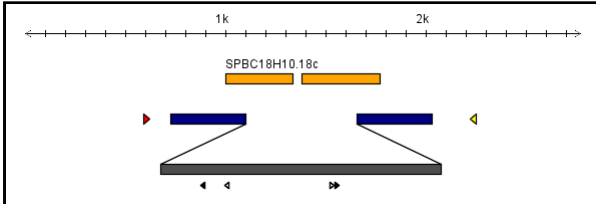

SPBC18H10.19

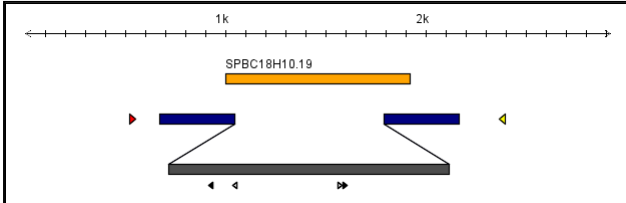

SPBC18H10.20c

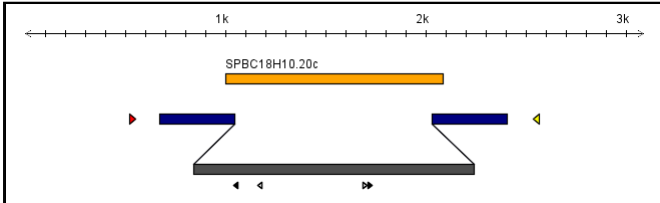

SPBC19C2.02

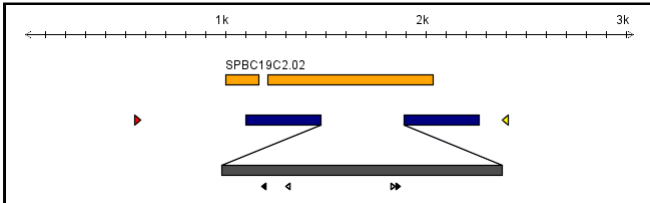

SPBC19C2.03

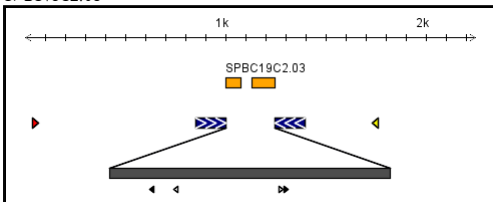

SPBC19C2.04c

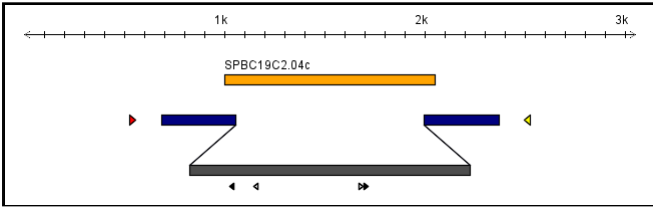

SPBC19C2.05

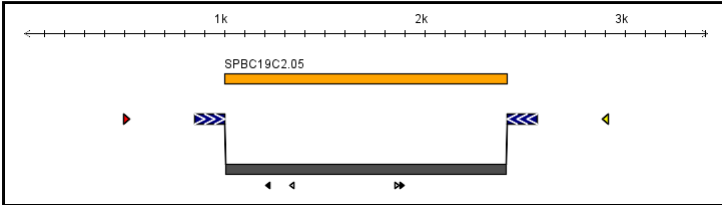

SPBC19C2.06c

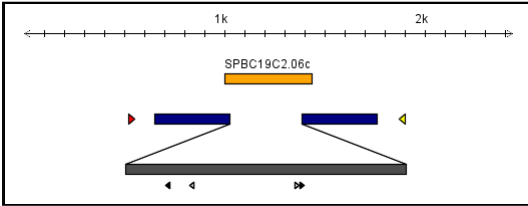

SPBC19C2.07

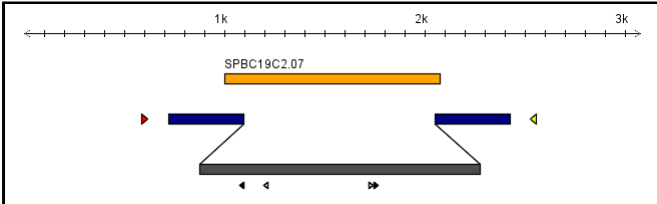

SPBC19C2.08

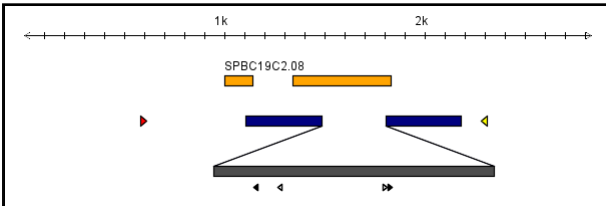

SPBC19C2.10

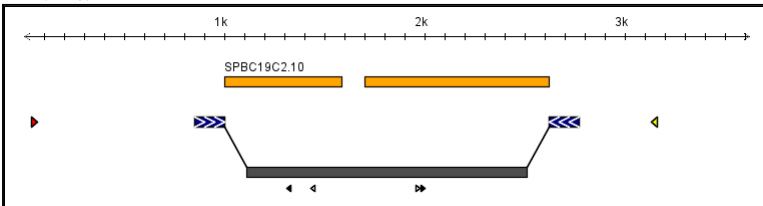

SPBC19C2.11c

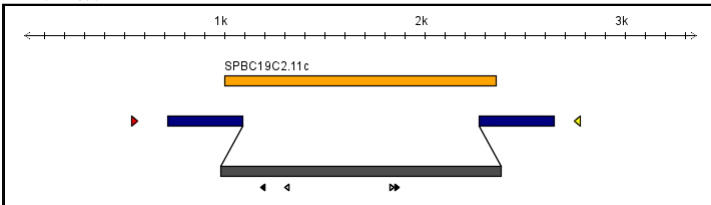

SPBC19C2.12

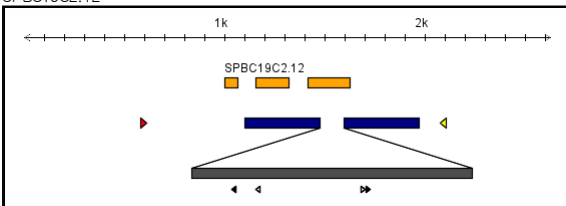

SPBC19C2.13c

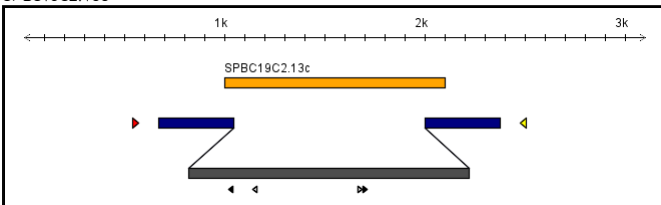

SPBC19C2.15c

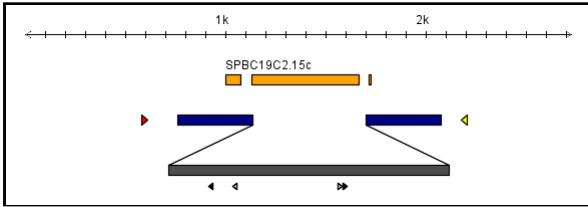

SPBC19C7.01

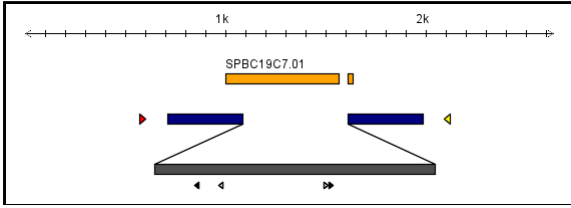

SPBC19C7.04c

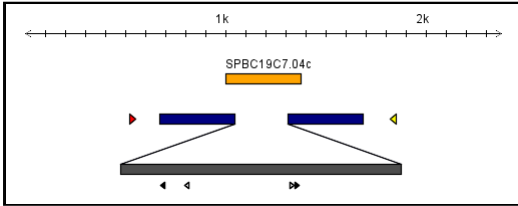

SPBC19C7.05

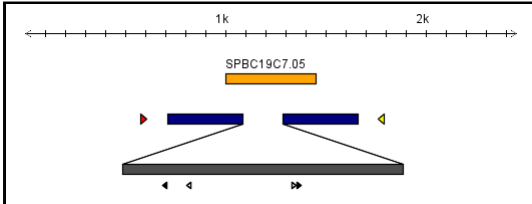

SPBC19C7.06

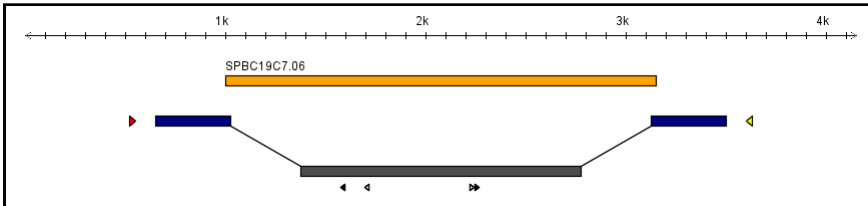

SPBC19C7.07c

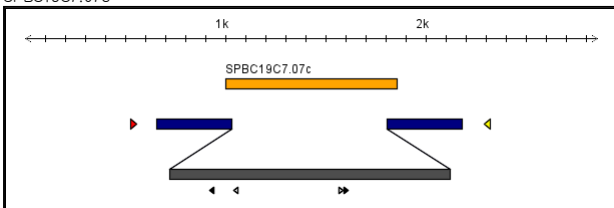

SPBC19C7.08c

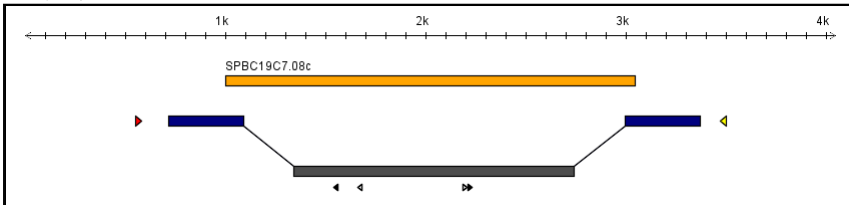

SPBC19C7.09c

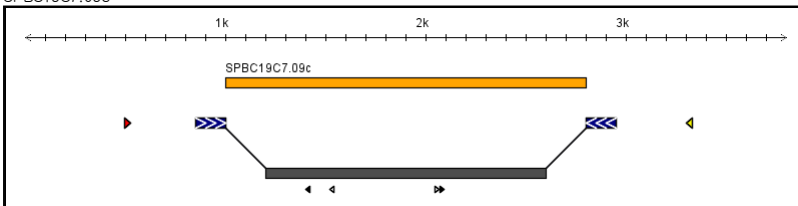

SPBC19C7.10

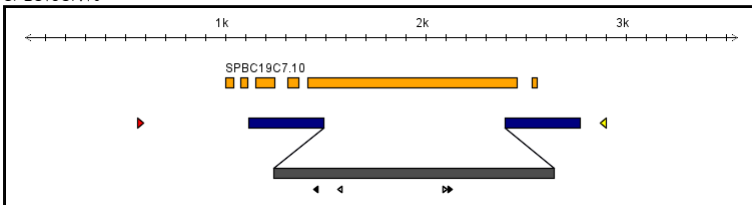

SPBC19C7.12c

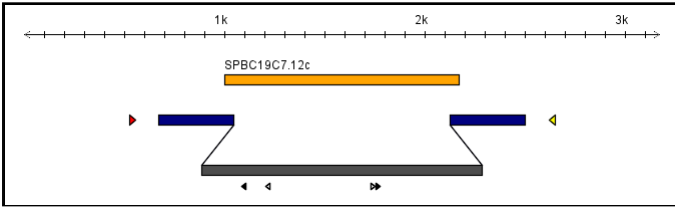

SPBC19F5.01c

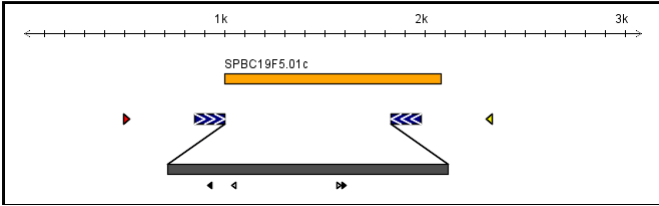

SPBC19F5.02c

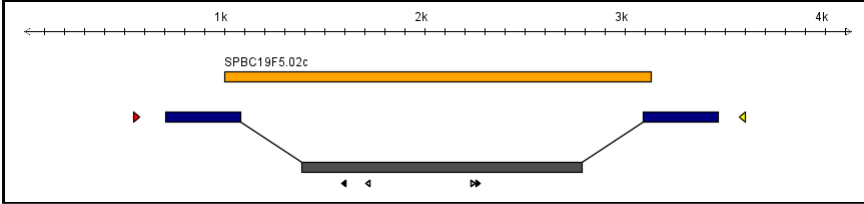

SPBC19F5.03

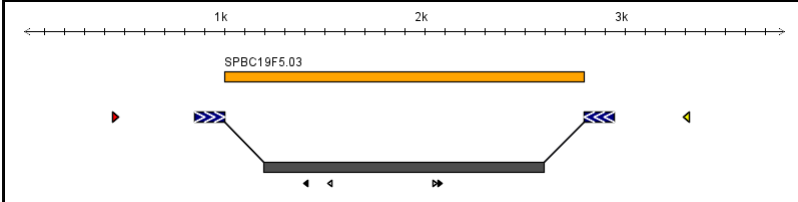

SPBC19F5.04

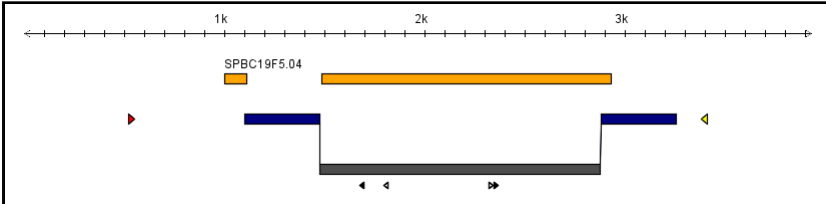

SPBC19F5.05c

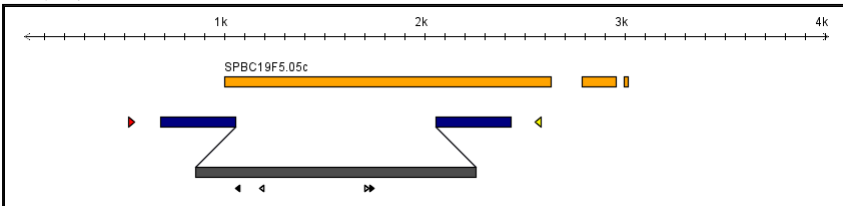

SPBC19F8.01c

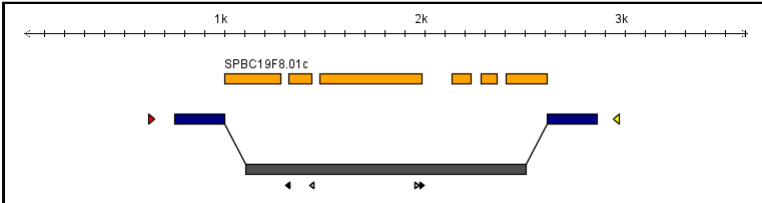

SPBC19F8.02

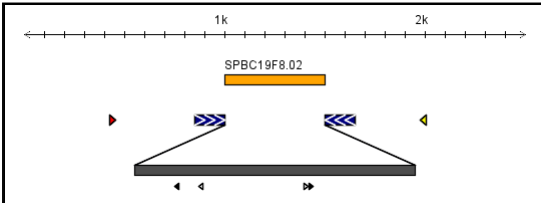

SPBC19F8.03c

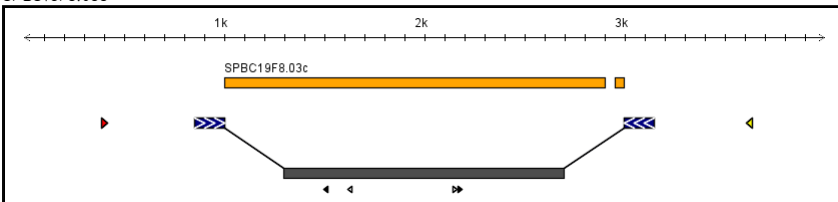

SPBC19F8.04c

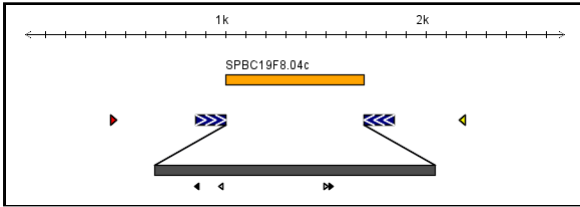

SPBC19F8.05

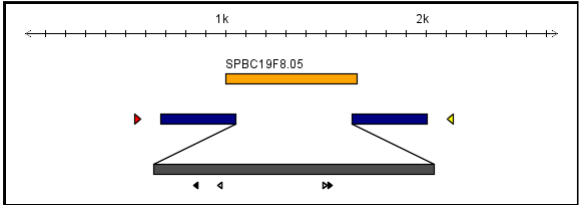

SPBC19F8.06c

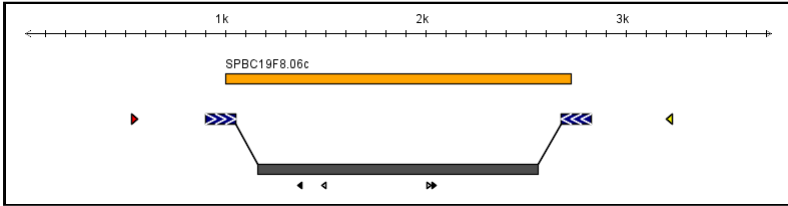

SPBC19F8.07

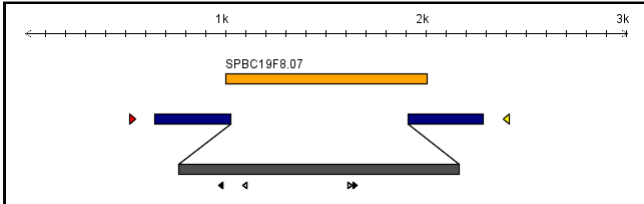

SPBC19F8.08

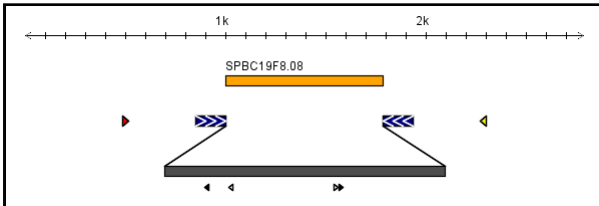

SPBC19G7.01c

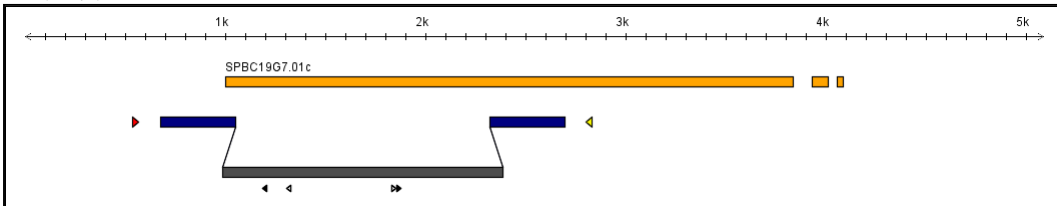

SPBC19G7.02

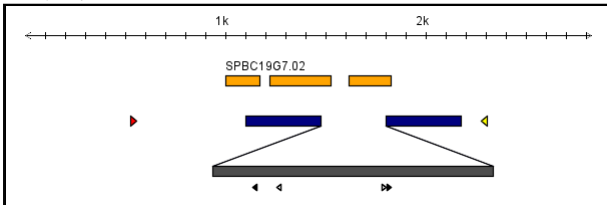

SPBC19G7.03c

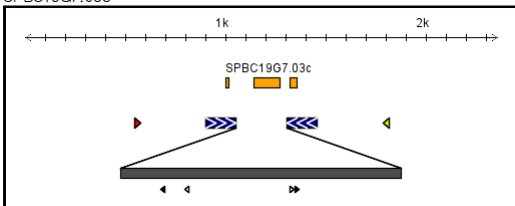

SPBC19G7.04

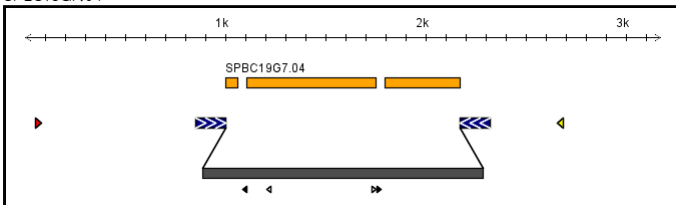

SPBC19G7.06

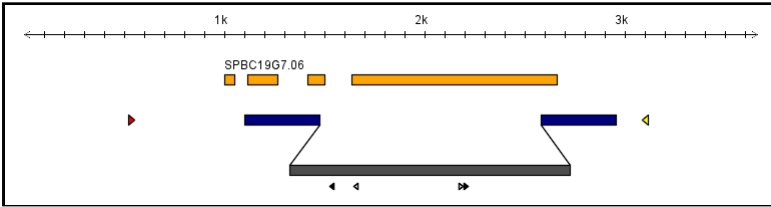

SPBC19G7.07c

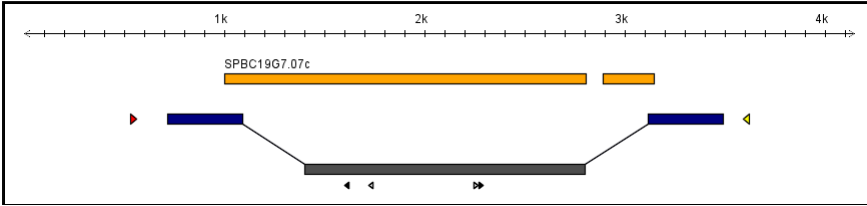

SPBC19G7.08c

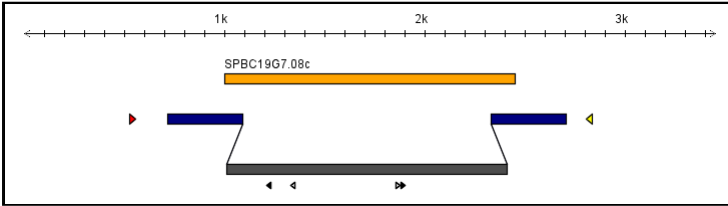

SPBC19G7.09

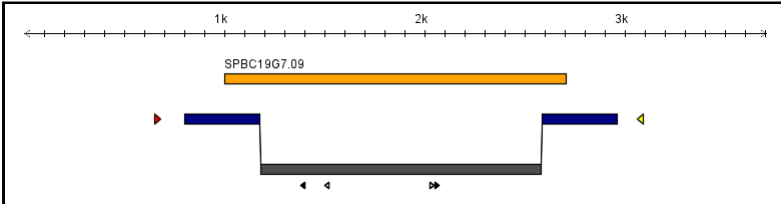

SPBC19G7.10c

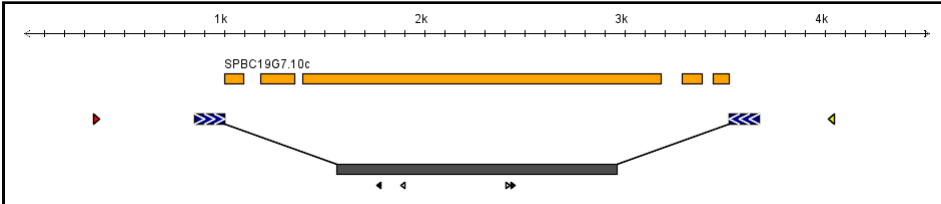

SPBC19G7.13

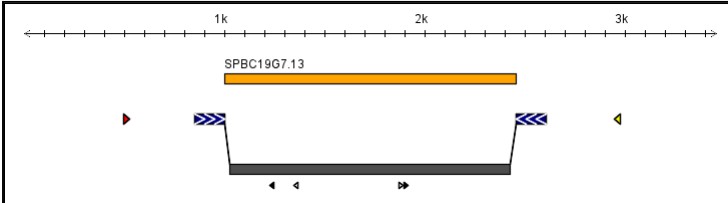

SPBC19G7.14c

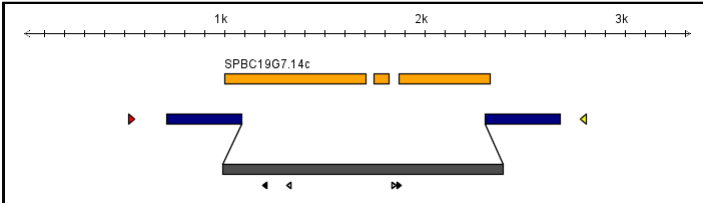

SPBC19G7.15

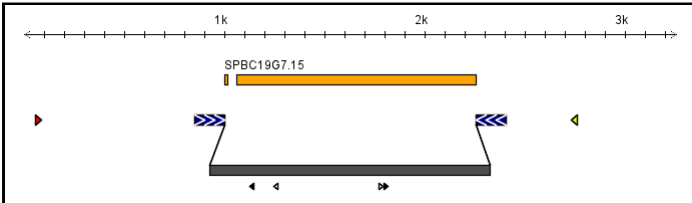

SPBC19G7.16

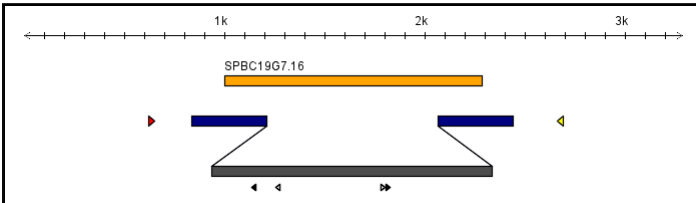





SPBC1A4.09

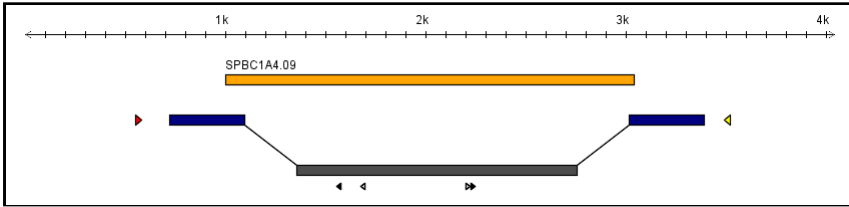

SPBC1A4.10c

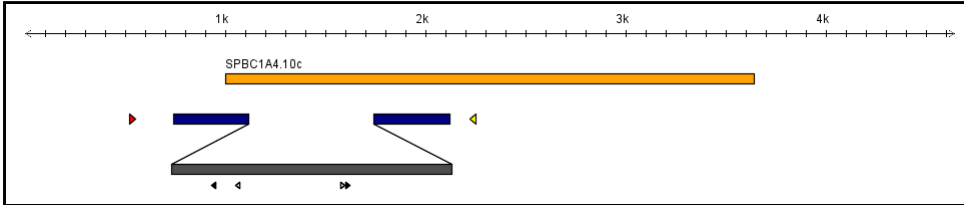

SPBC1A4.11c

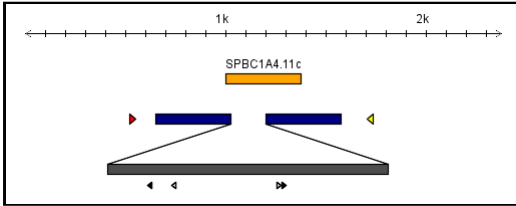

SPBC1D7.01

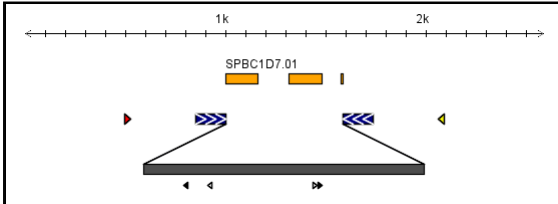

SPBC1D7.03

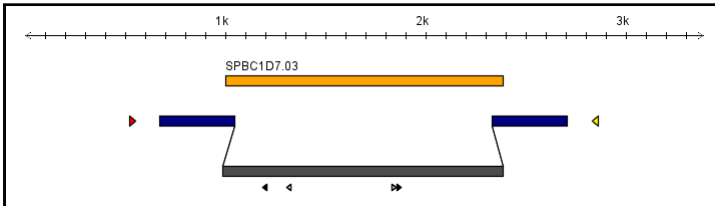

SPBC1D7.04

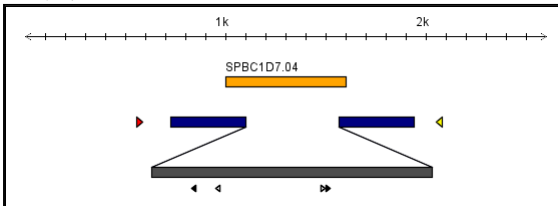

SPBC1D7.05

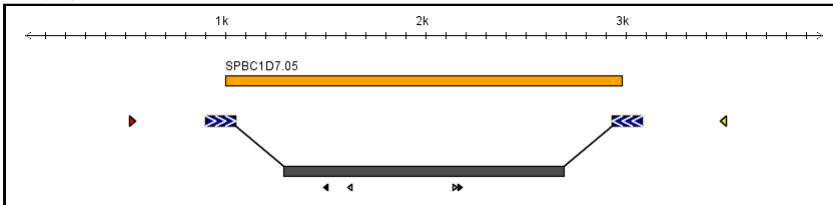

SPBC1E8.02

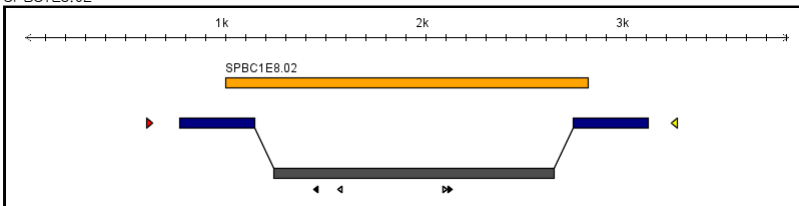

SPBC1E8.03c

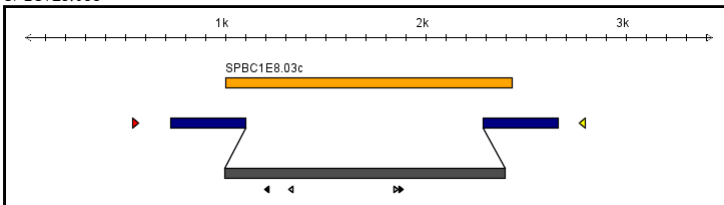

SPBC1E8.05

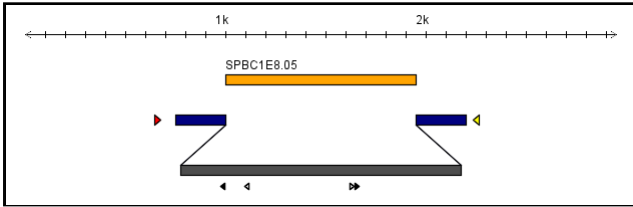

SPBC20F10.01

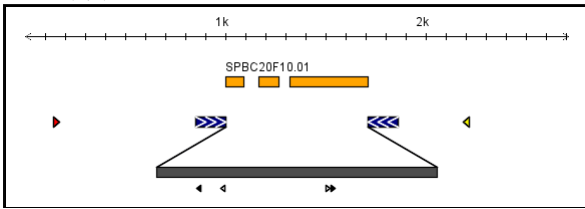

SPBC20F10.02c

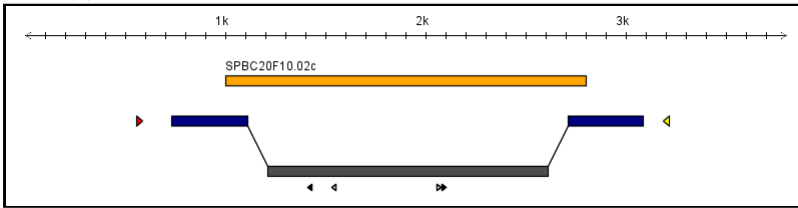

SPBC20F10.03

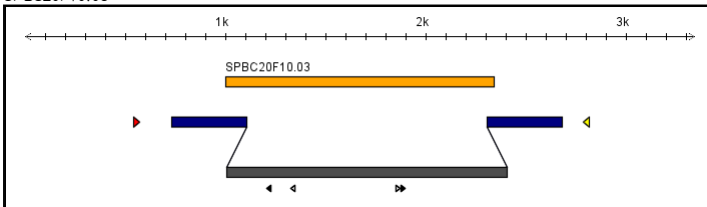

SPBC20F10.04c

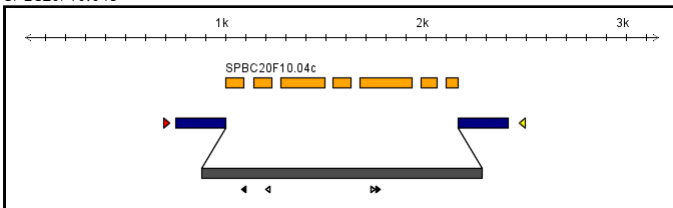

SPBC20F10.06

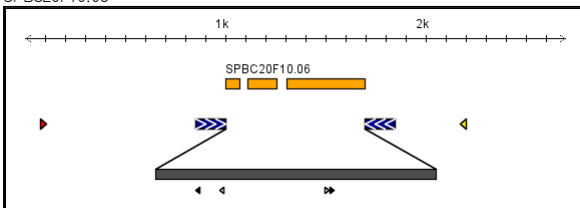

SPBC20F10.07

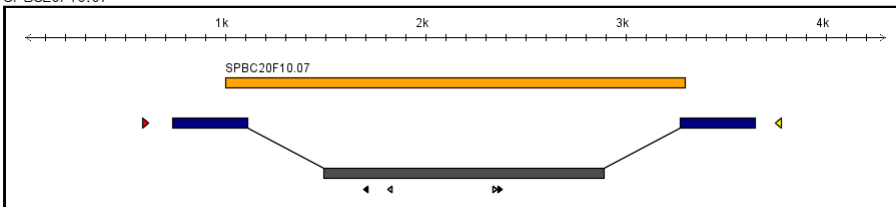

SPBC20F10.08c

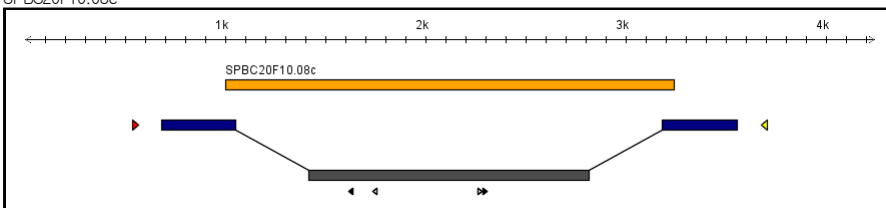

SPBC20F10.09

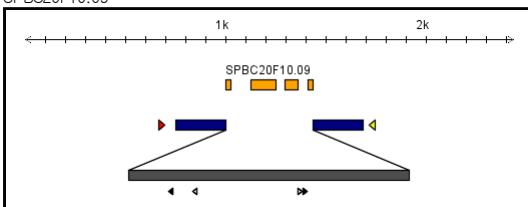

SPBC20F10.10

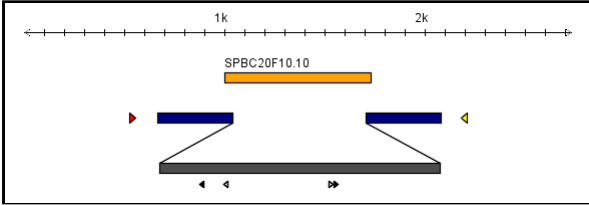

SPBC21.01

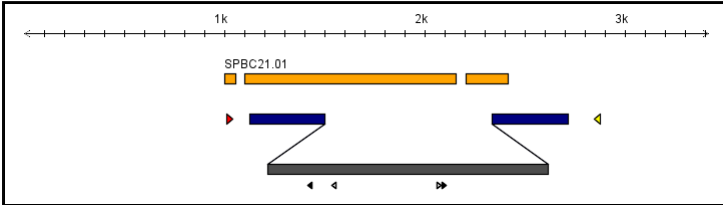

SPBC21.02

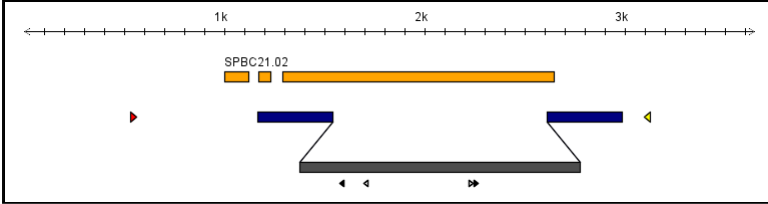

SPBC21.03c

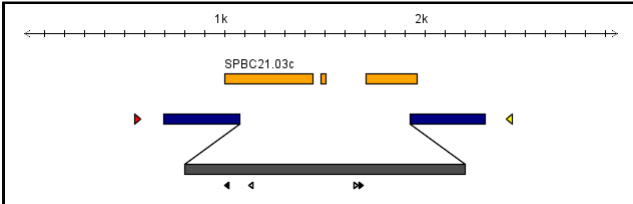

SPBC21.04

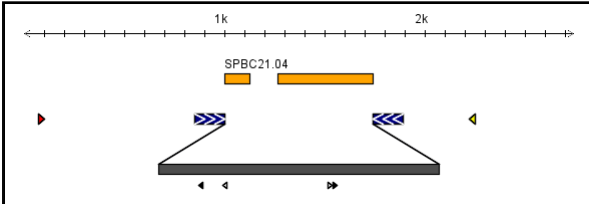

SPBC21.05c

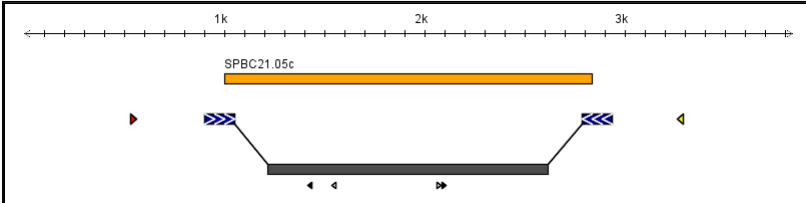

SPBC21.06c

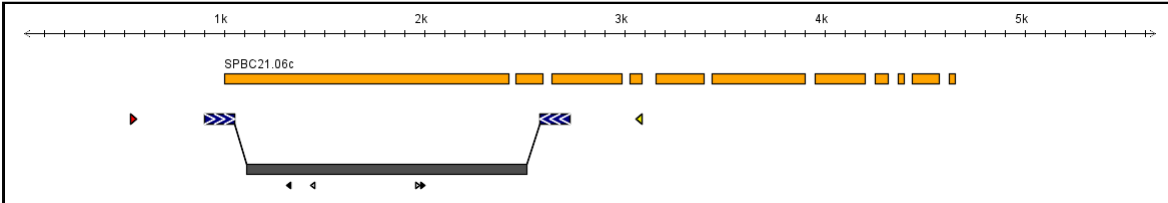

SPBC21.07c

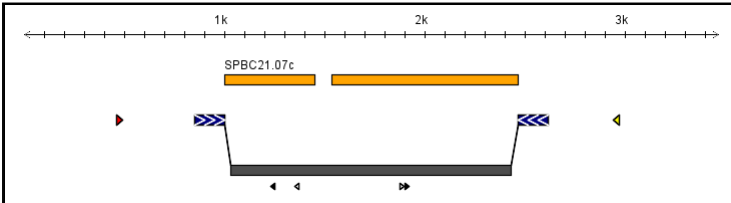

SPBC21B10.02

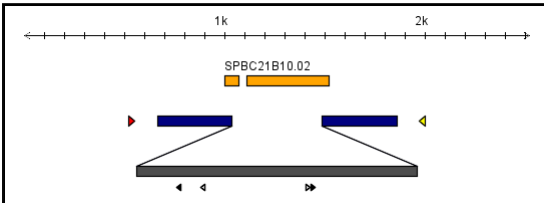

SPBC21B10.04c

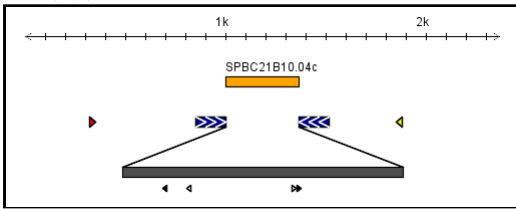

SPBC21B10.05c

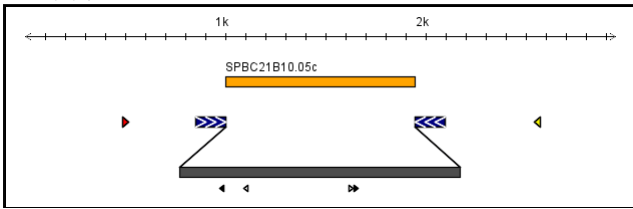

SPBC21B10.06c

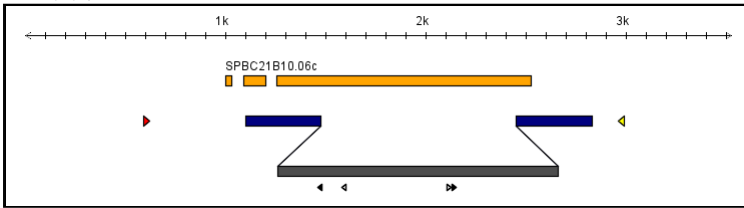

SPBC21B10.07

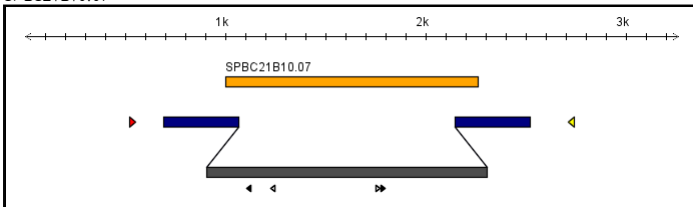

SPBC21B10.08c

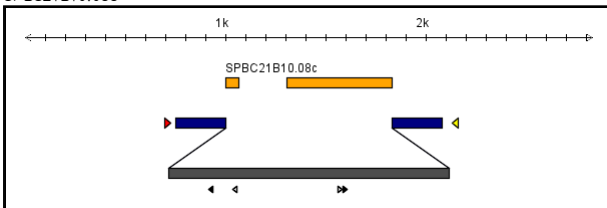

SPBC21B10.09

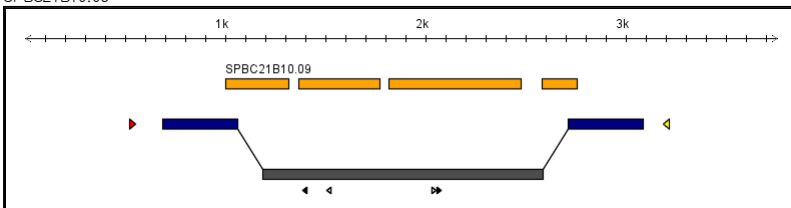

SPBC21B10.10

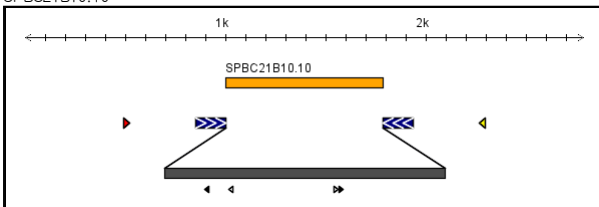

SPBC21B10.11

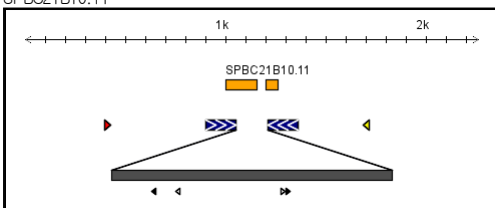

SPBC21B10.12

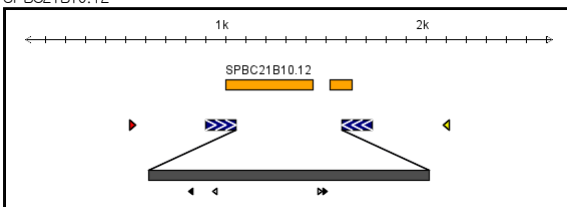

SPBC21B10.13c

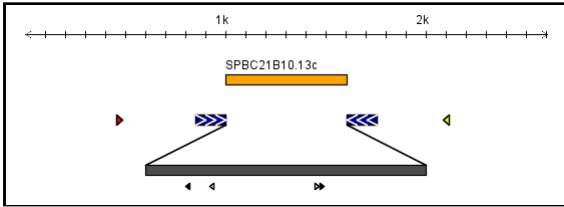

SPBC21C3.02c

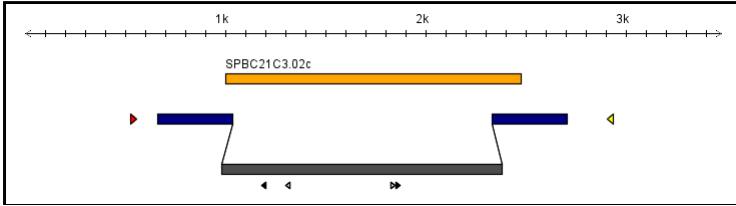

SPBC21C3.03

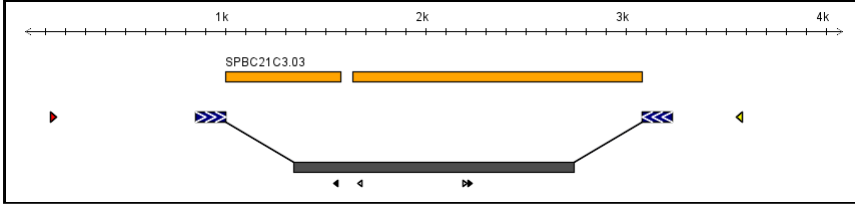

SPBC21C3.04c

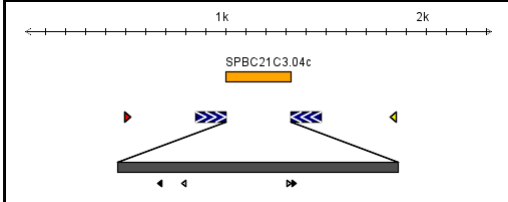

SPBC21C3.05

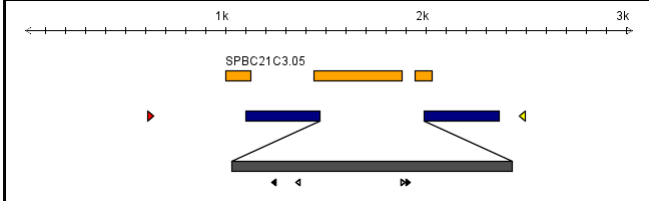

SPBC21C3.06

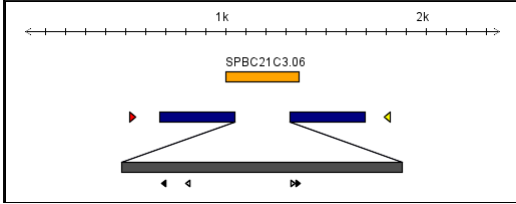

SPBC21C3.07c

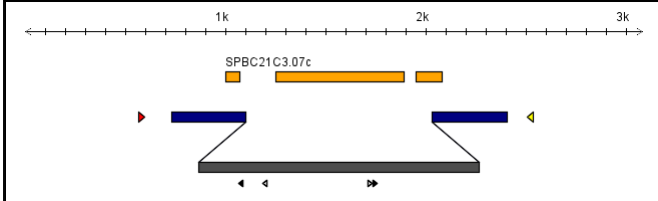

SPBC21C3.08c

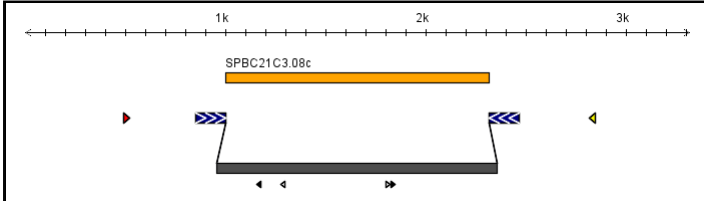

SPBC21C3.09c

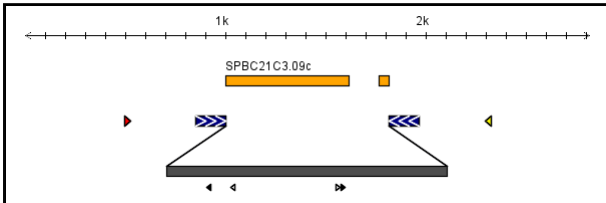

SPBC21C3.10c

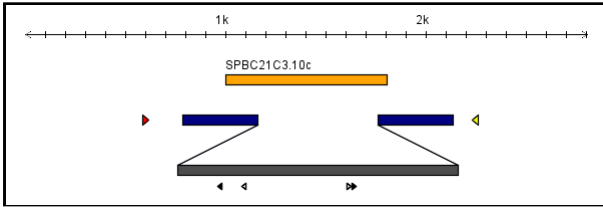

SPBC21C3.11

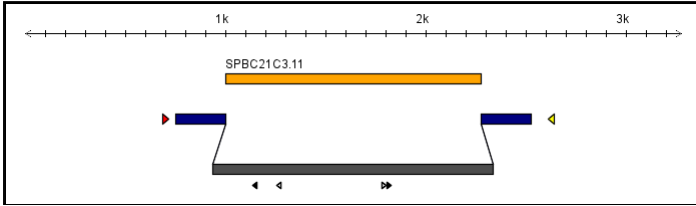

SPBC21C3.12c

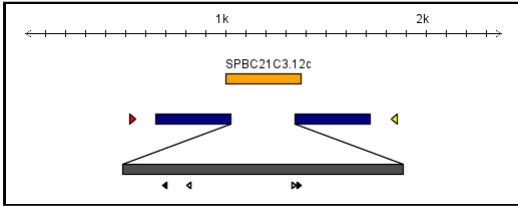

SPBC21C3.13

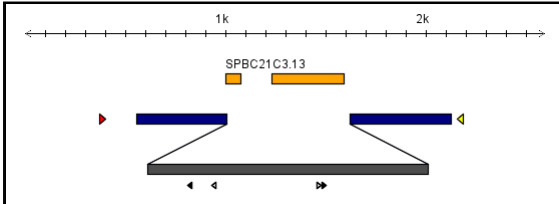

SPBC21C3.15c

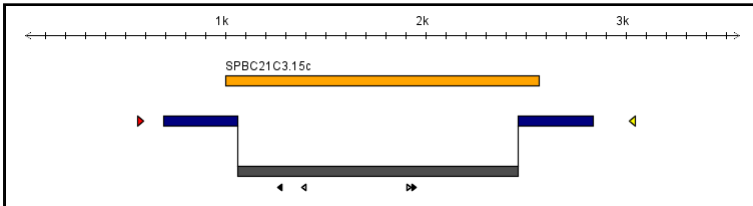

SPBC21C3.16c

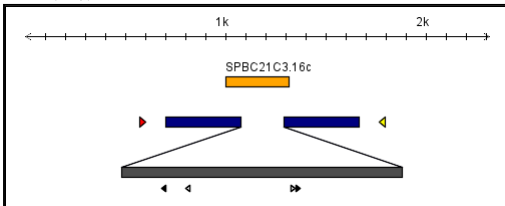

SPBC21C3.17c

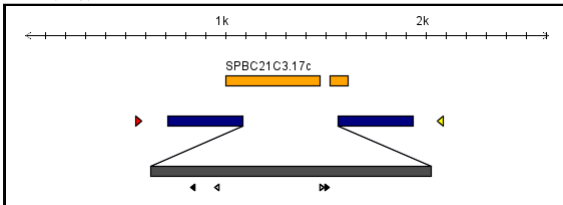

SPBC21C3.18

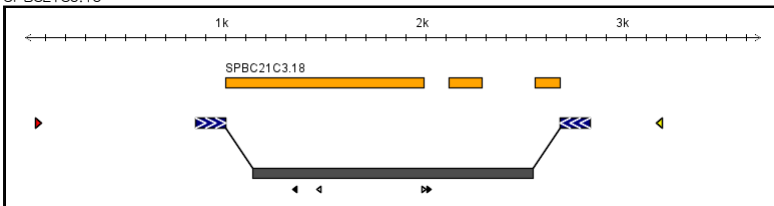

SPBC21C3.19

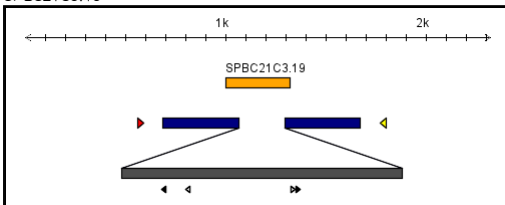

SPBC21D10.05c

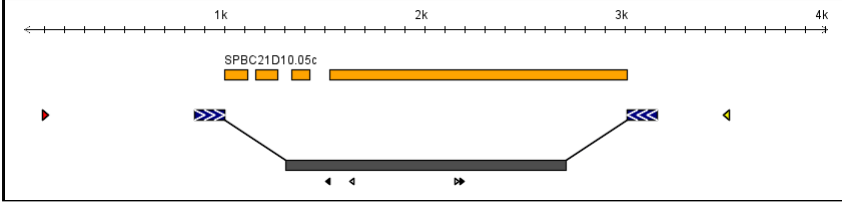

SPBC21D10.07

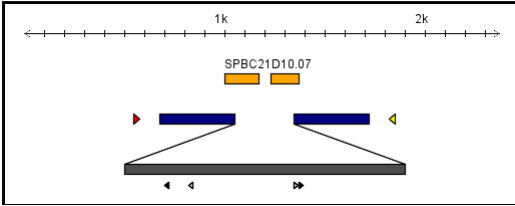

SPBC21D10.08c

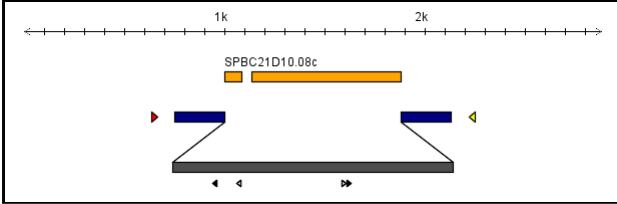

SPBC21D10.10

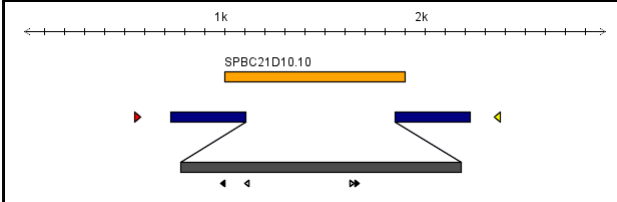

SPBC21D10.11c

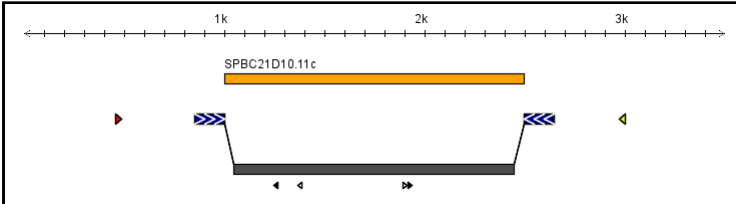

SPBC21D10.12

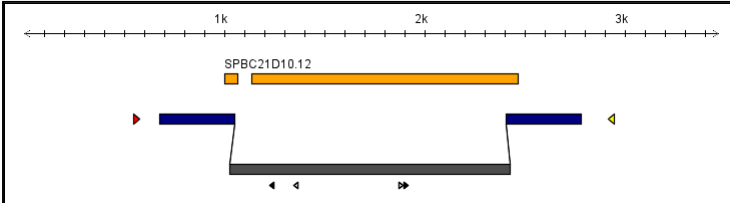

SPBC21H7.02

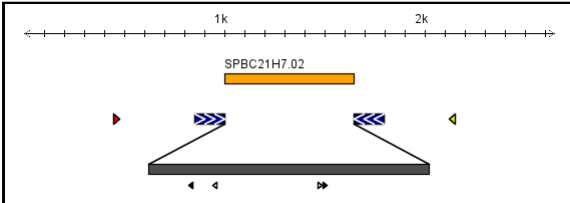

SPBC21H7.03c

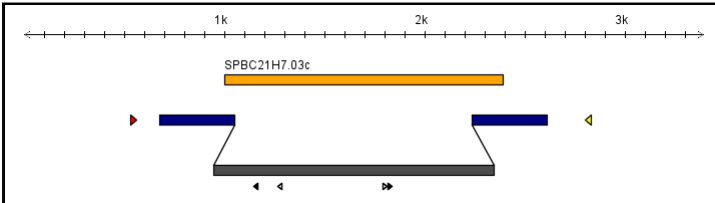

SPBC21H7.05

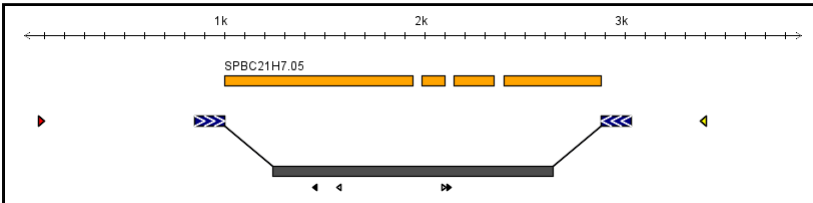



SPBC21H7.06c

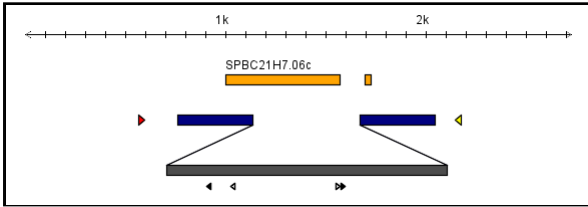

SPBC21H7.07c

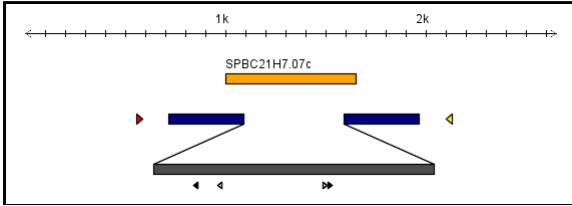

SPBC23E6.03c

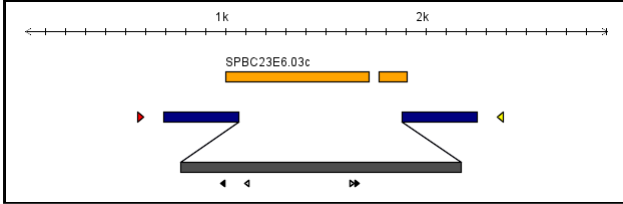

SPBC23E6.05

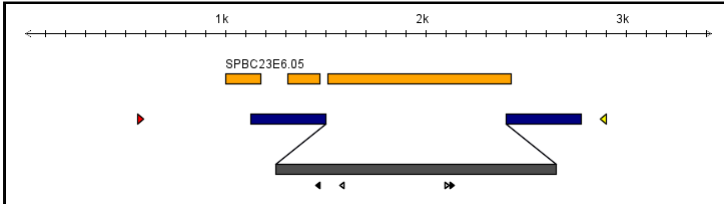

SPBC23E6.06c

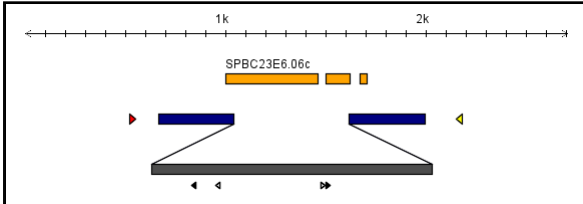

SPBC23E6.08

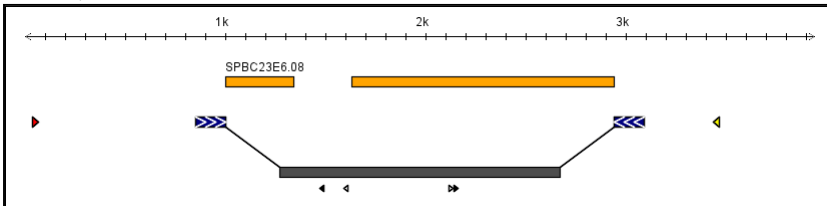

SPBC23E6.10c

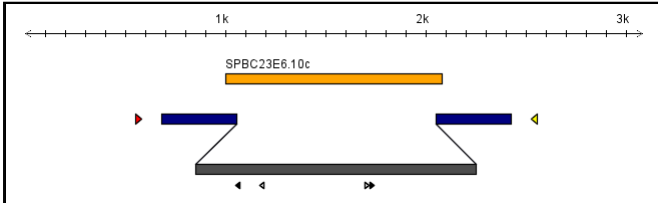

SPBC23G7.04c

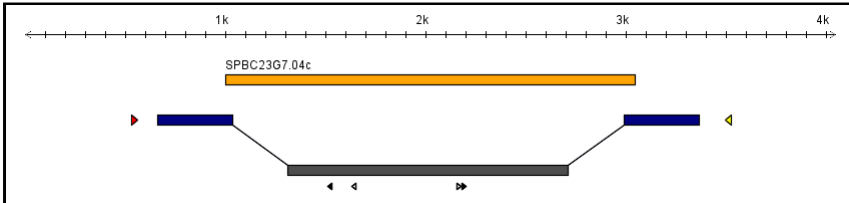

SPBC23G7.05

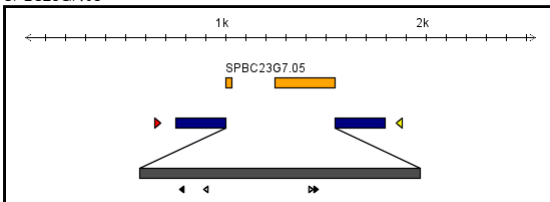

SPBC23G7.06c

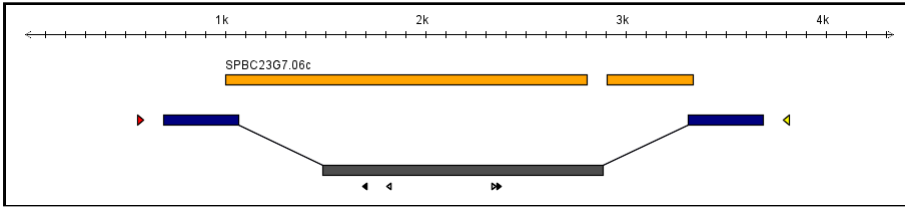

SPBC23G7.07c

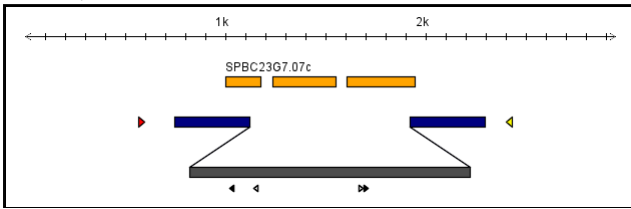

SPBC23G7.08c

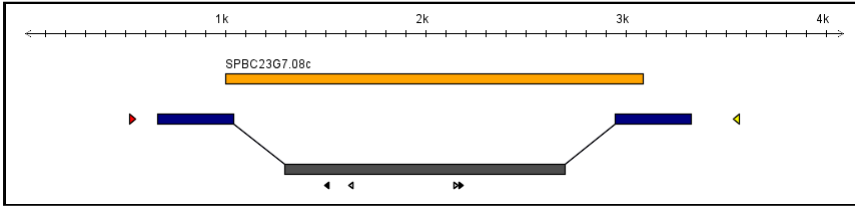

SPBC23G7.10c

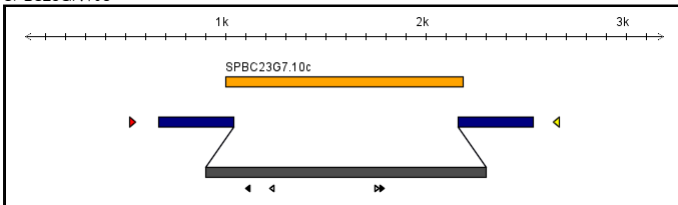

SPBC23G7.11

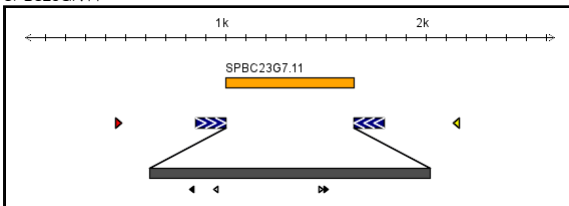

SPBC23G7.12c

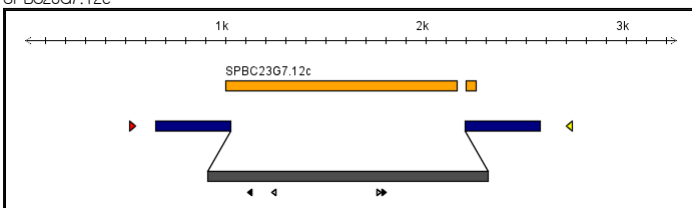

SPBC23G7.13c

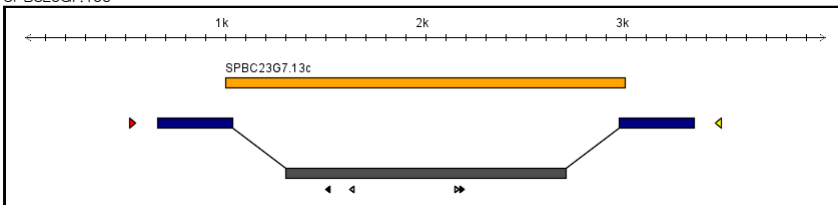

SPBC23G7.14

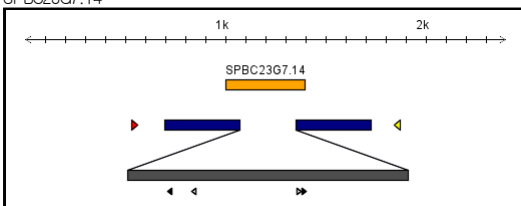

SPBC23G7.15c

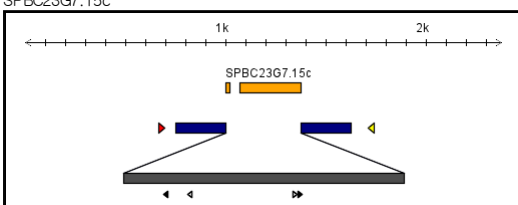

SPBC23G7.16

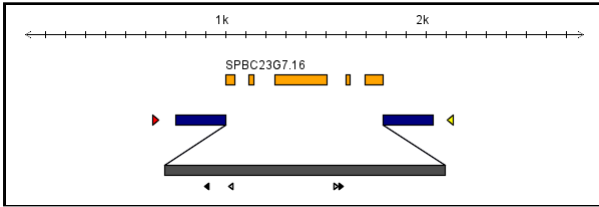

SPBC24C6.02

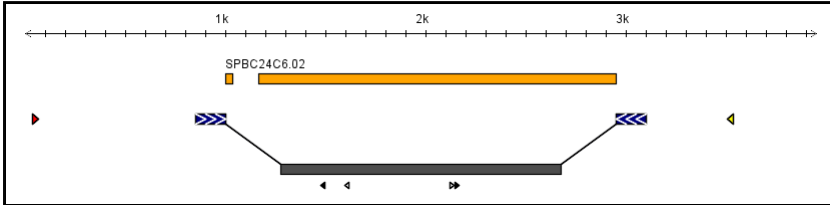

SPBC24C6.03

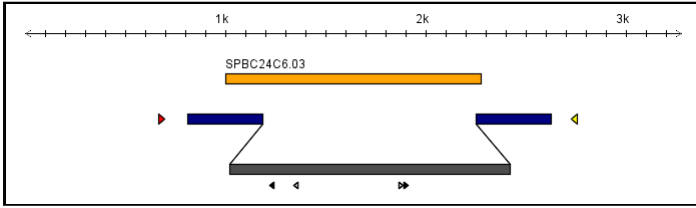

SPBC24C6.04

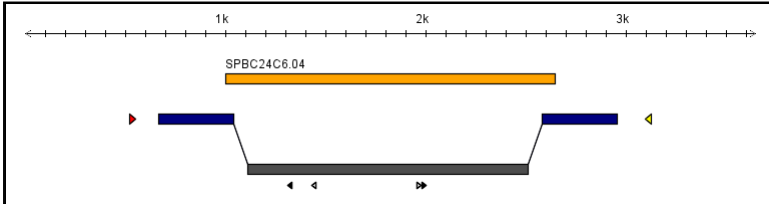

SPBC24C6.05

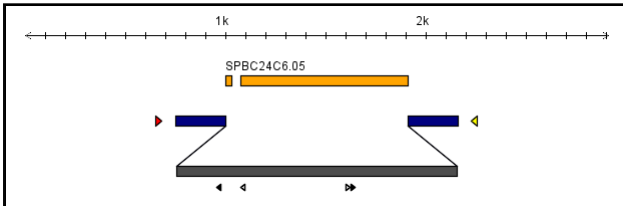

SPBC24C6.06

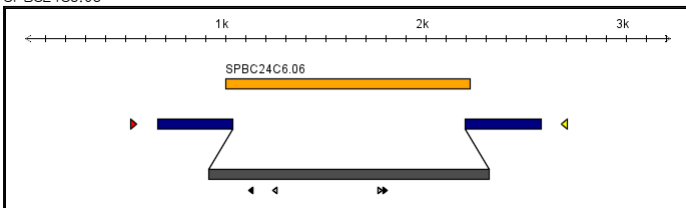

SPBC24C6.07

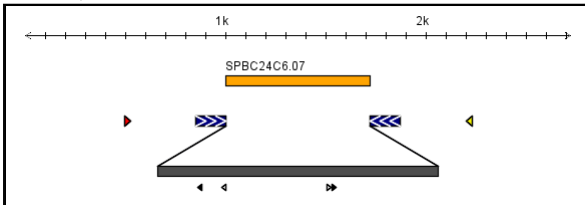

SPBC24C6.08c

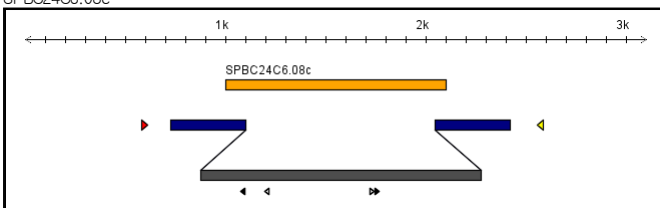

SPBC24C6.10c

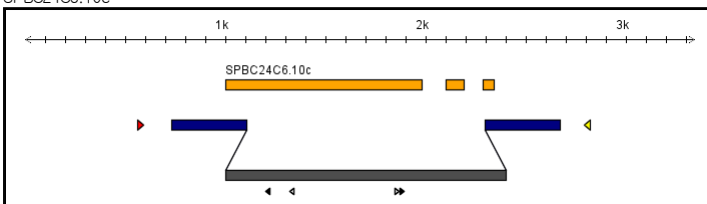

SPBC24C6.11

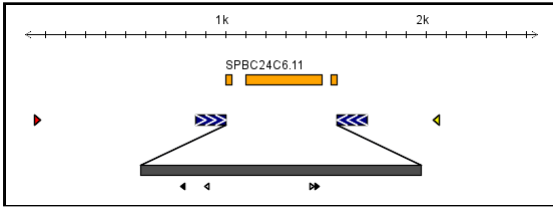

SPBC25B2.01

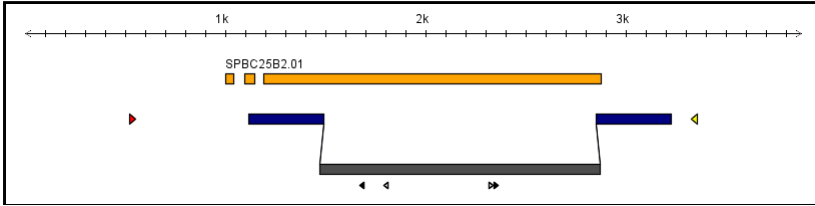

SPBC25B2.03

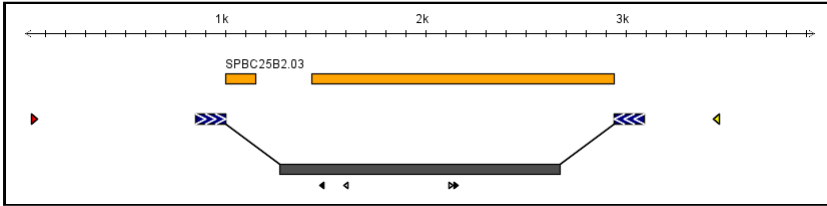

SPBC25B2.04c

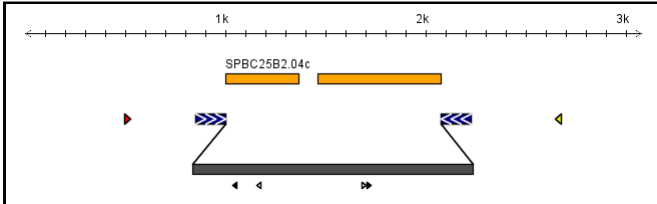

SPBC25B2.05

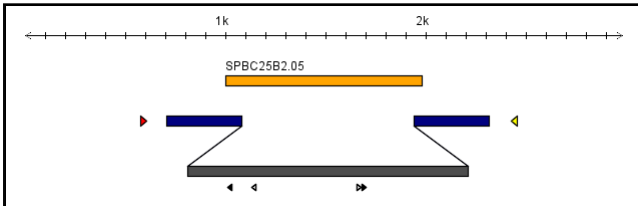

SPBC25B2.06c

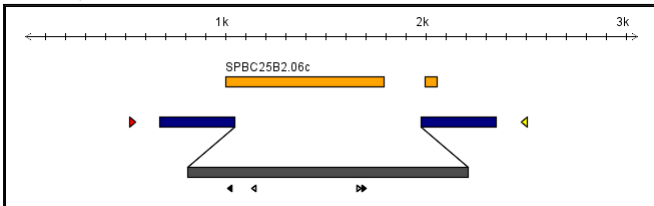

SPBC25B2.07c

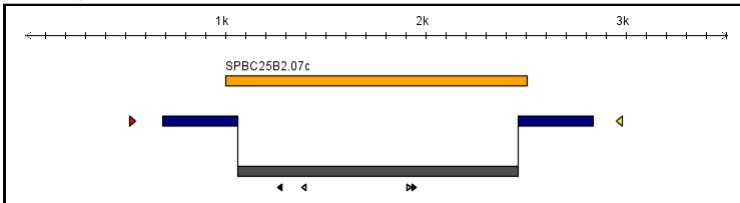

SPBC25B2.08

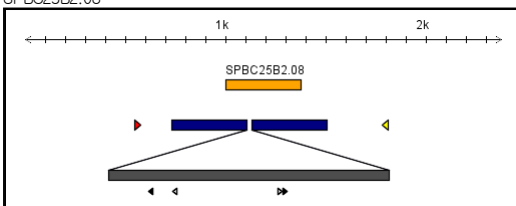

SPBC25B2.09c

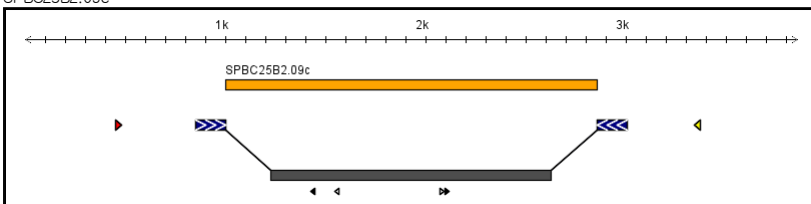

SPBC25B2.10

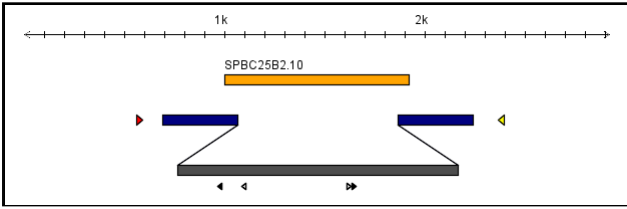

SPBC25B2.11

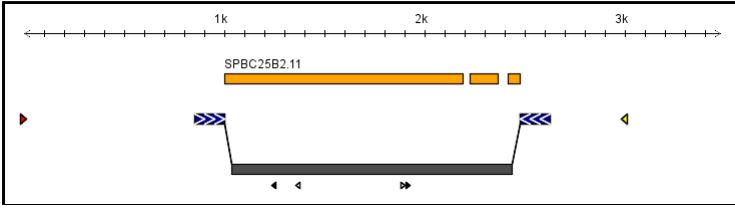

SPBC25D12.02c

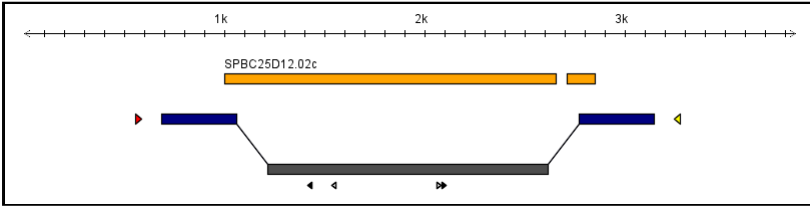

SPBC25D12.03c

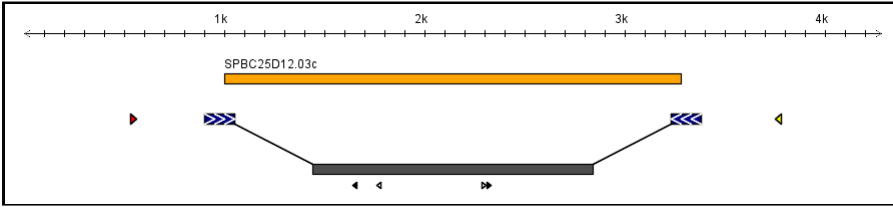

SPBC25D12.04

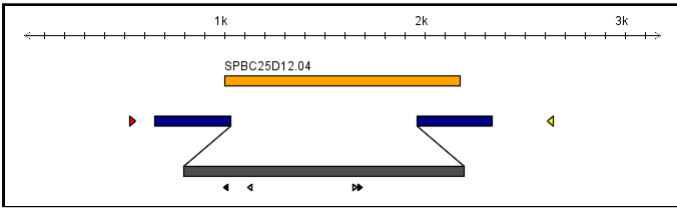

SPBC25D12.05

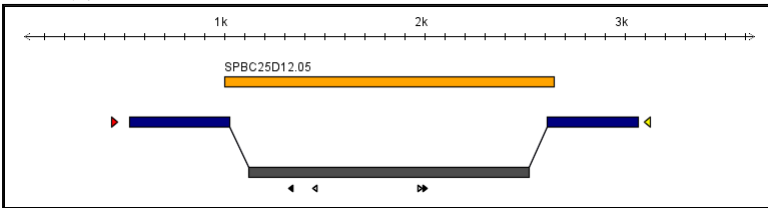

SPBC25D12.06

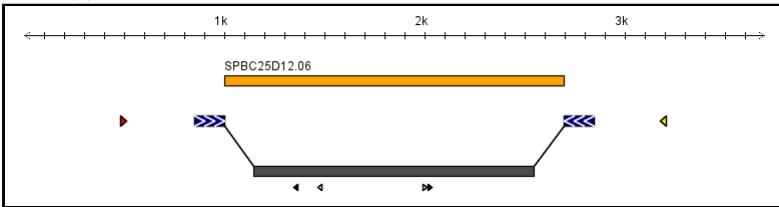

SPBC25H2.02

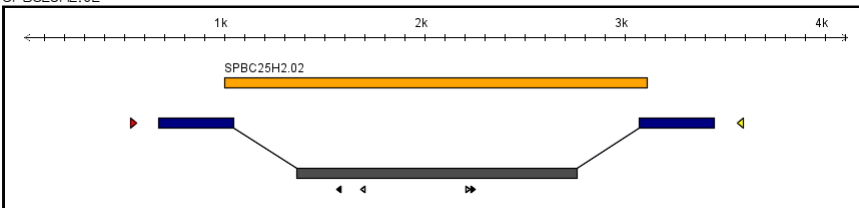

SPBC25H2.03

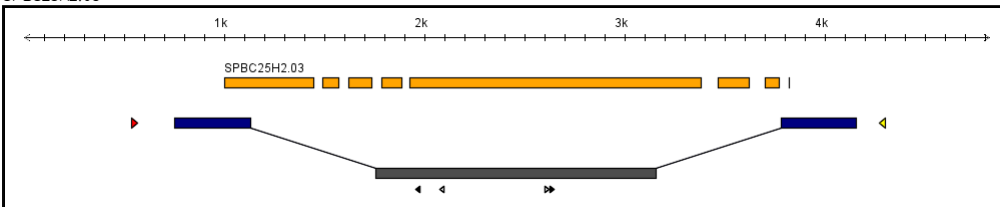

SPBC25H2.04c

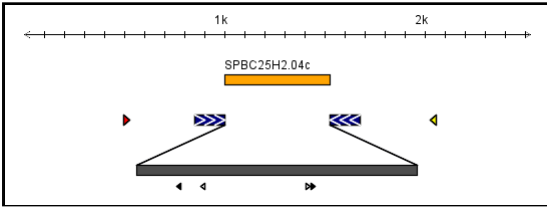

SPBC25H2.05

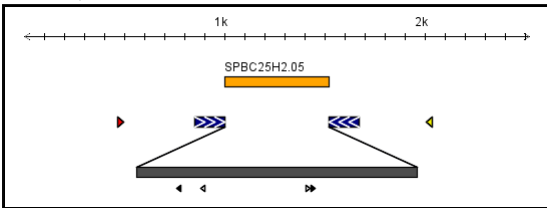

SPBC25H2.06c

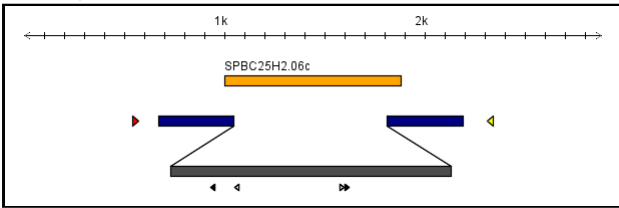

SPBC25H2.07

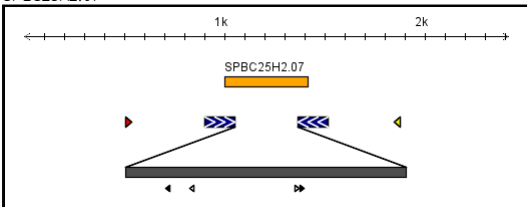

SPBC25H2.08c

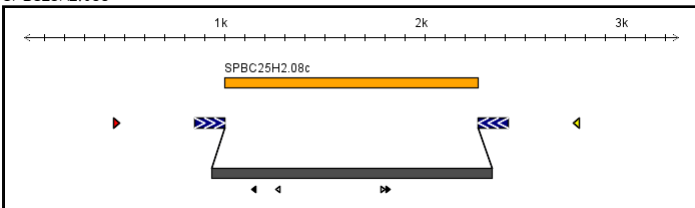

SPBC25H2.09

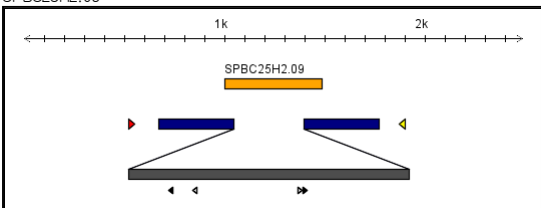

SPBC25H2.10c

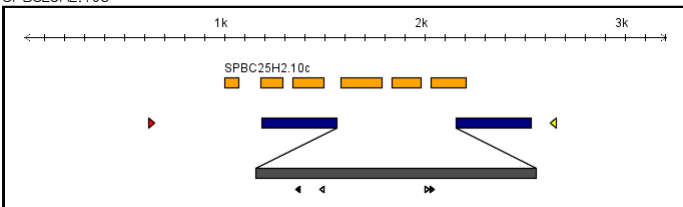

SPBC25H2.12c

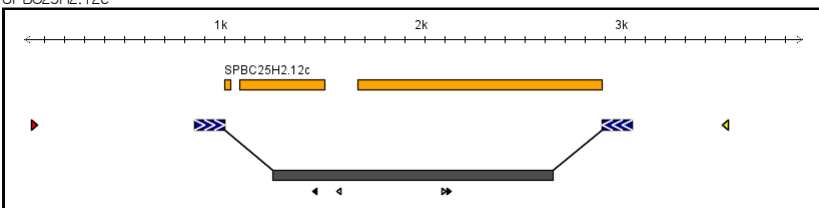

SPBC25H2.14

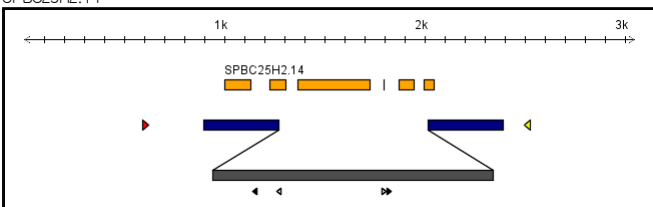

SPBC25H2.15

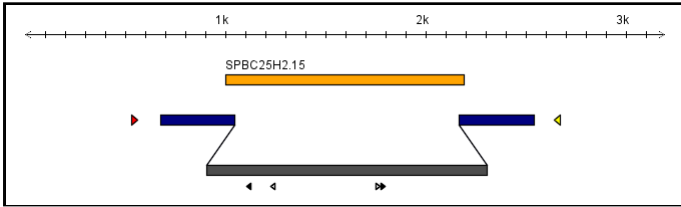

SPBC25H2.16c

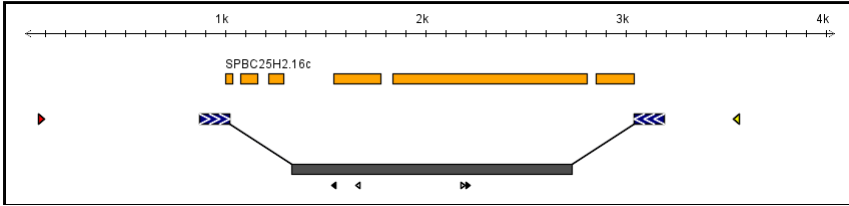

SPBC26H8.01

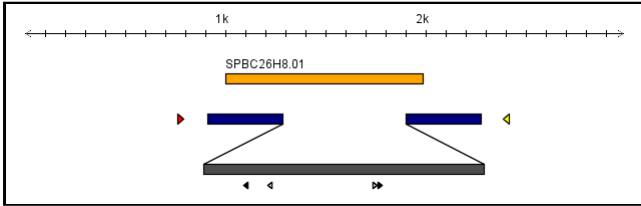

SPBC26H8.02c

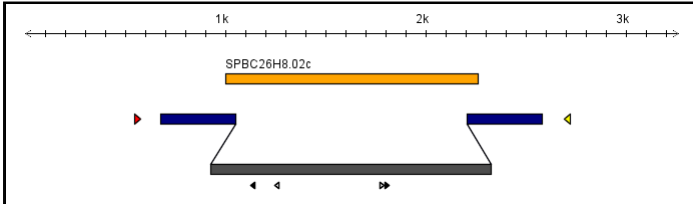

SPBC26H8.05c

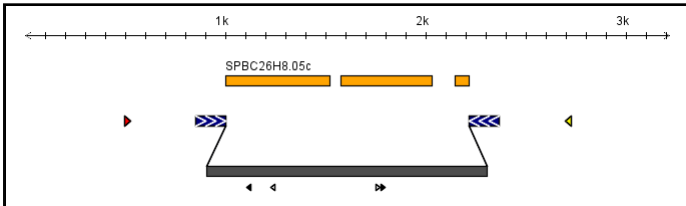

SPBC26H8.06

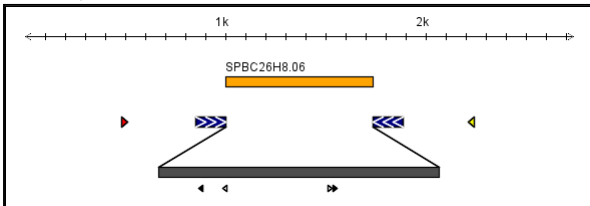

SPBC26H8.07c

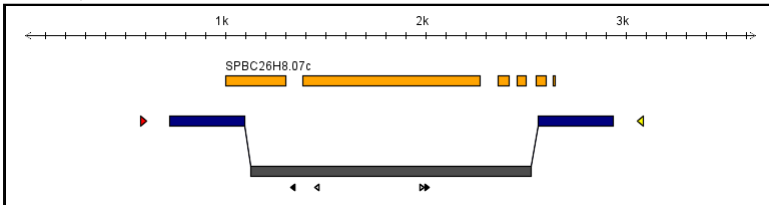

SPBC26H8.08c

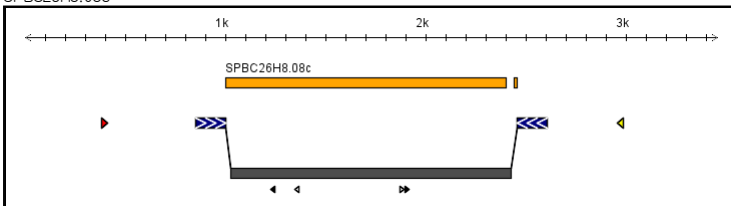

SPBC26H8.09c

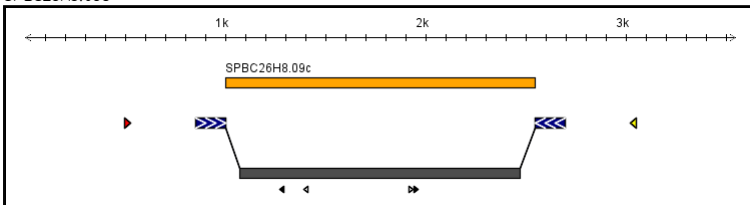

SPBC26H8.11c

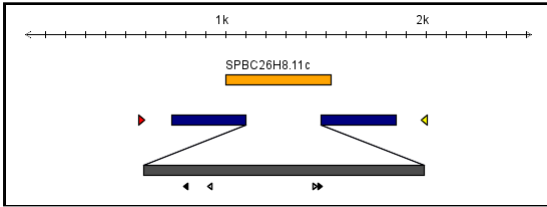

SPBC26H8.12

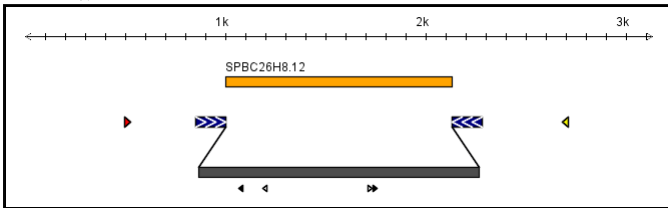

SPBC26H8.13c

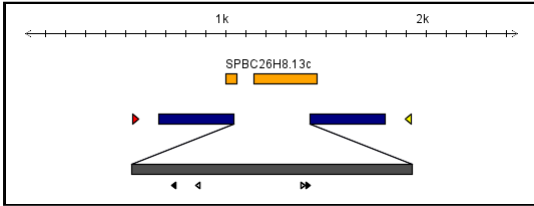

SPBC26H8.14c

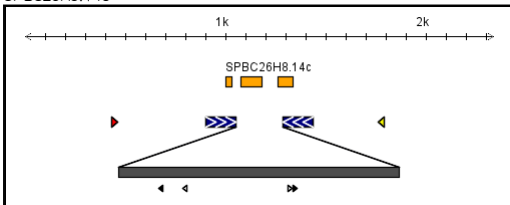

SPBC27.01c

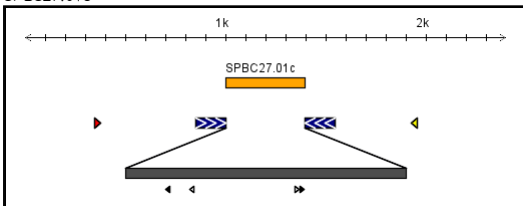

SPBC27.02c

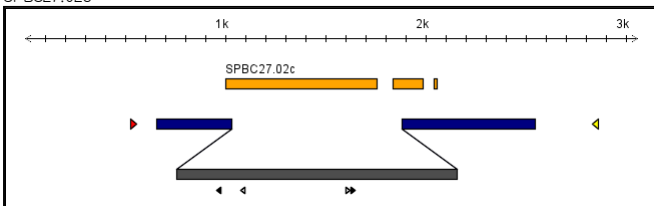

SPBC27.03

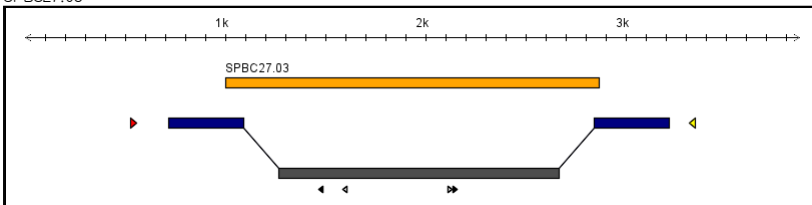

SPBC27.06c

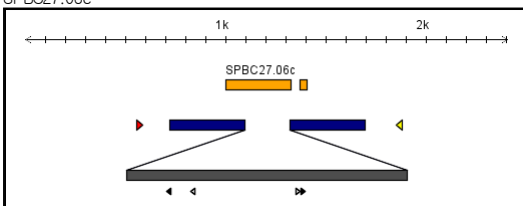

SPBC27.08c

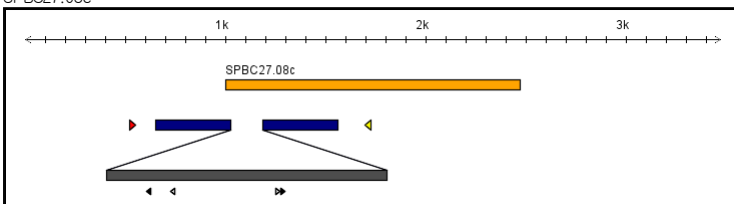



SPBC27B12.01c

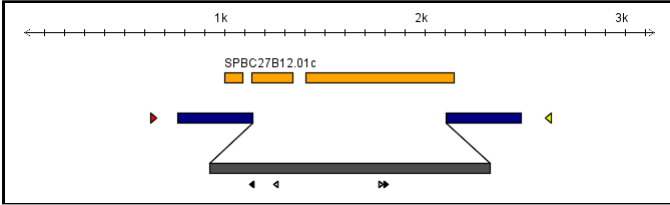

SPBC27B12.02

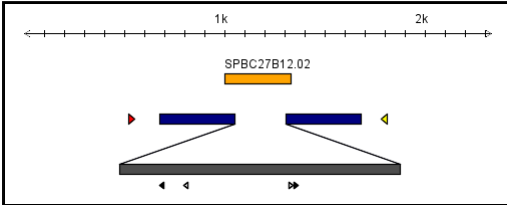

SPBC27B12.03c

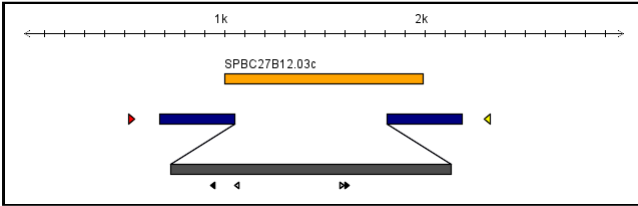

SPBC27B12.04c

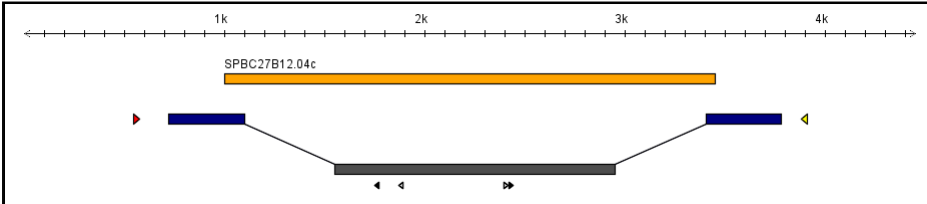

SPBC27B12.05

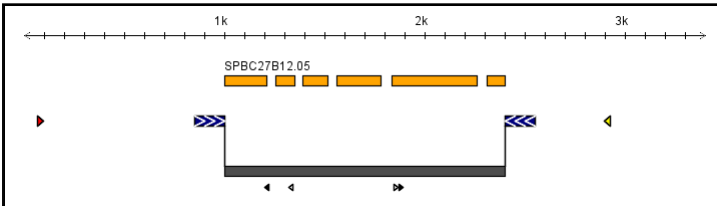

SPBC27B12.07

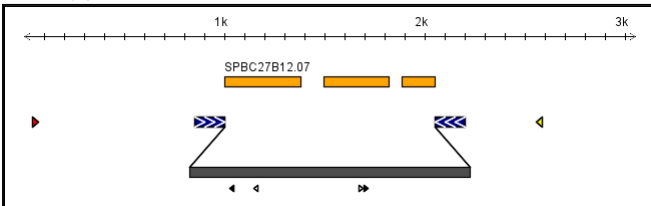

SPBC27B12.09c

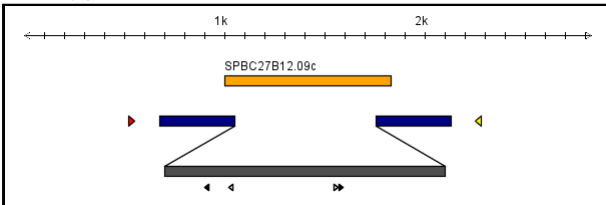

SPBC27B12.10c

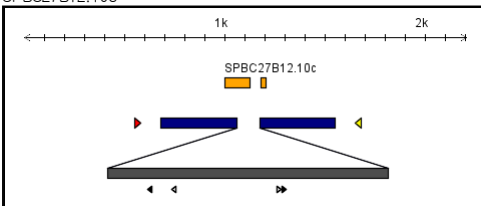

SPBC27B12.11c

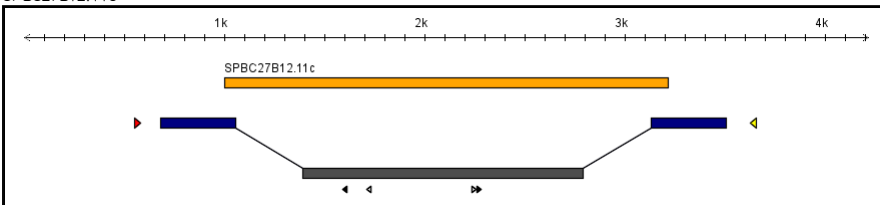

SPBC27B12.12c

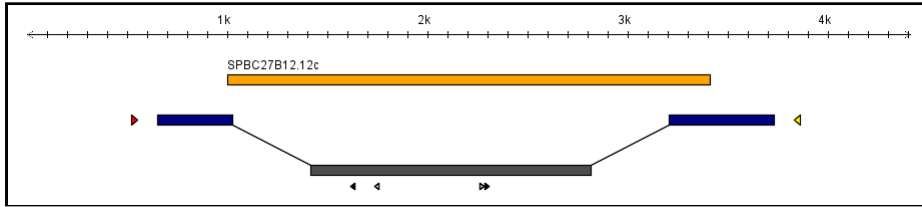

SPBC27B12.13

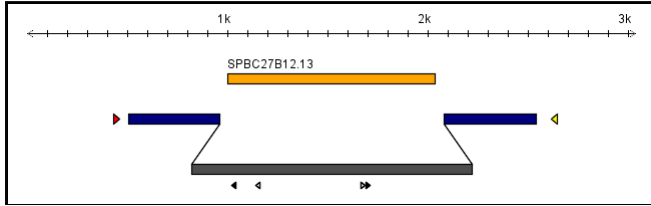

SPBC28E12.01c

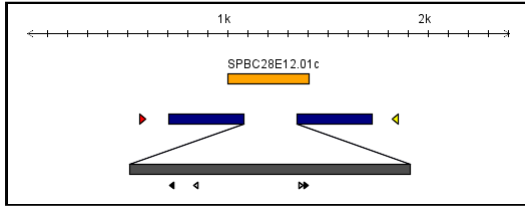

SPBC28E12.02

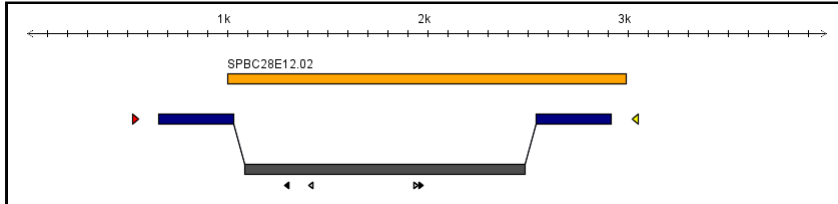

SPBC28E12.04

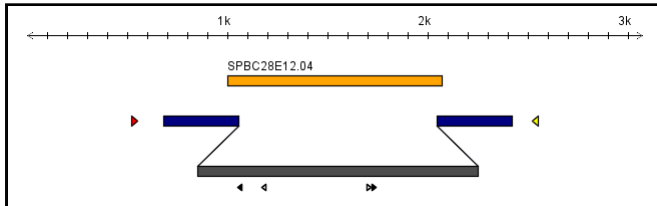

SPBC28E12.05

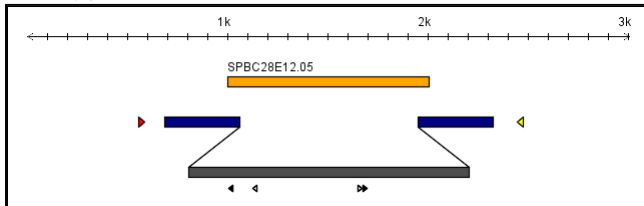

SPBC28F2.02

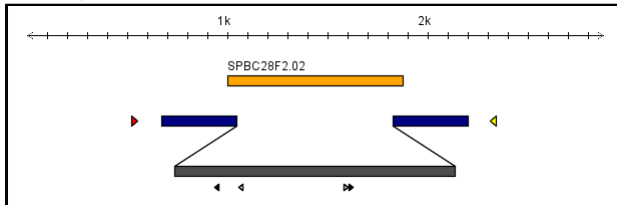

SPBC28F2.03

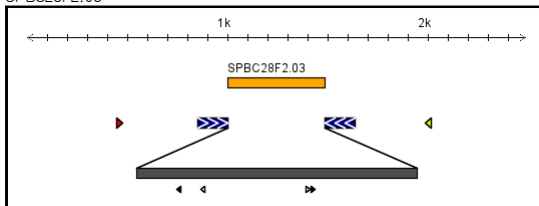

SPBC28F2.04c

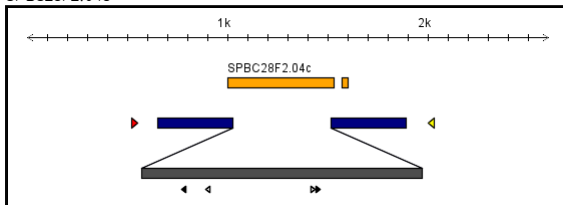

SPBC28F2.05c

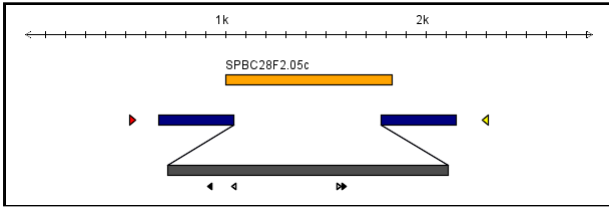

SPBC28F2.06c

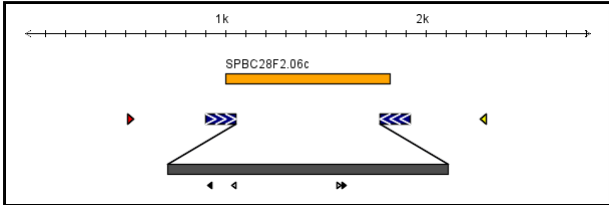

SPBC28F2.07

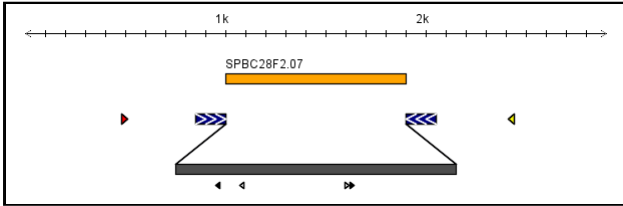

SPBC28F2.08c

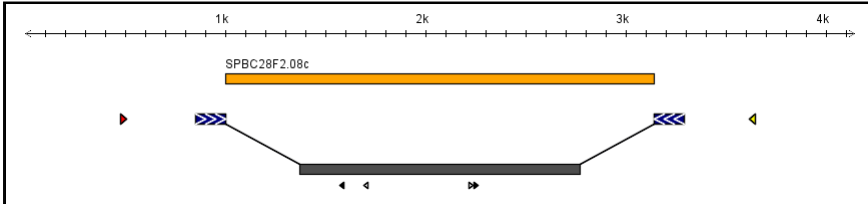

SPBC28F2.09

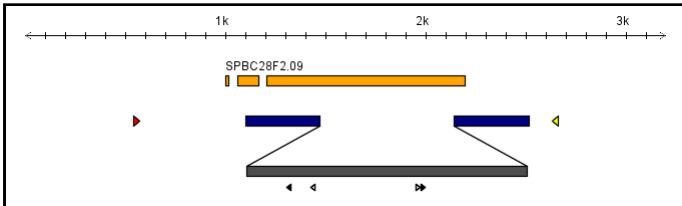

SPBC28F2.10c

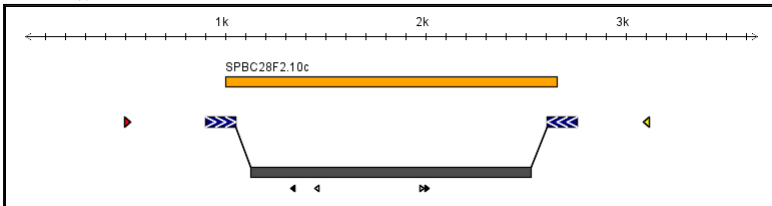

SPBC28F2.11

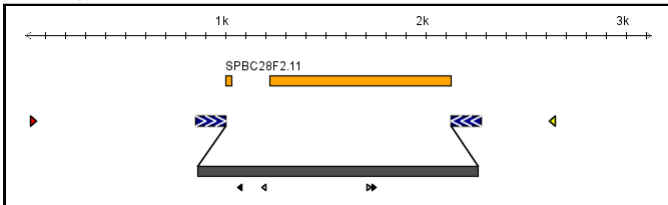

SPBC29A10.01

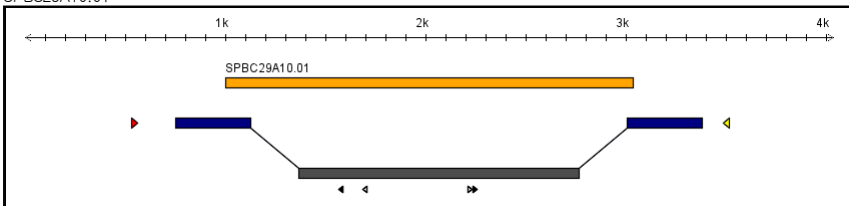

SPBC29A10.02

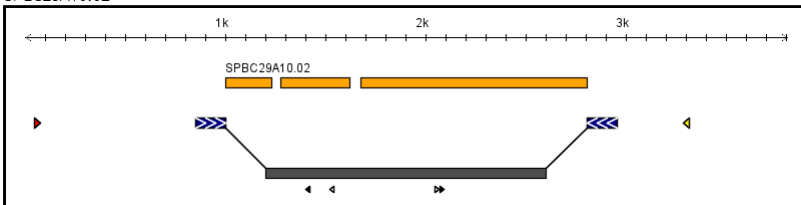

SPBC29A10.03c

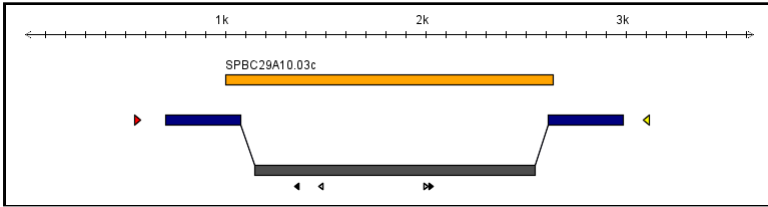

SPBC29A10.05

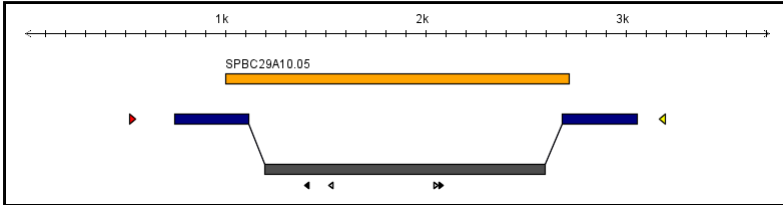

SPBC29A10.06c

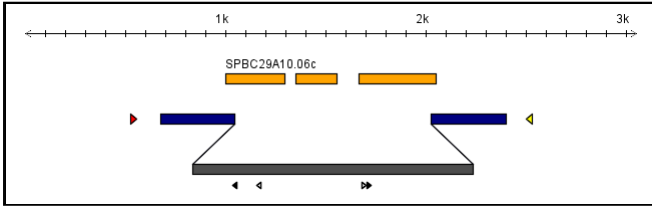

SPBC29A3.02c

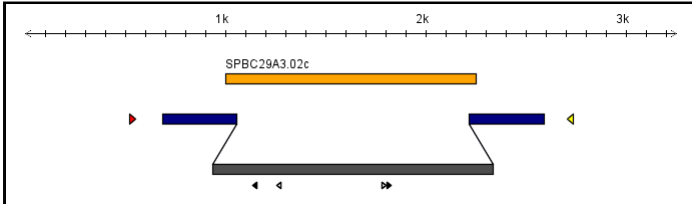

SPBC29A3.03c

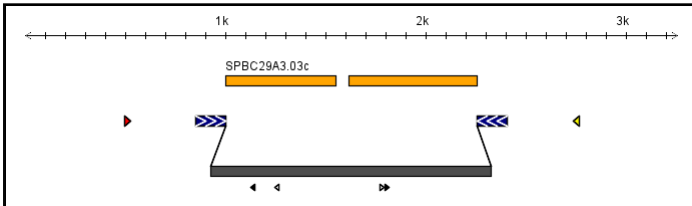

SPBC29A3.04

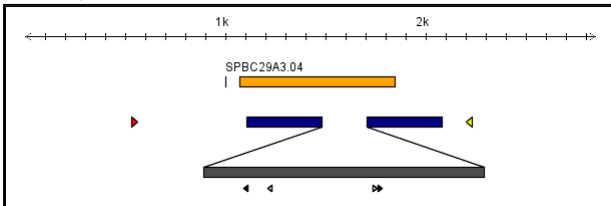

SPBC29A3.05

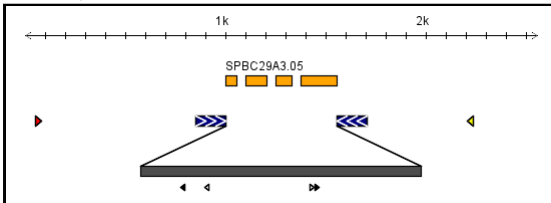

SPBC29A3.06

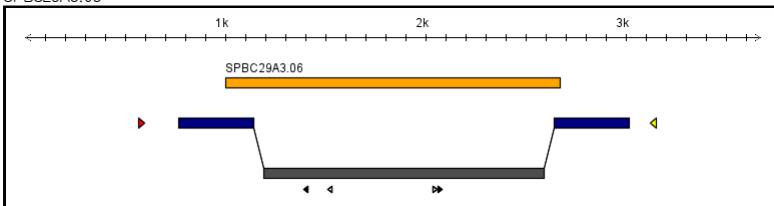

SPBC29A3.07c

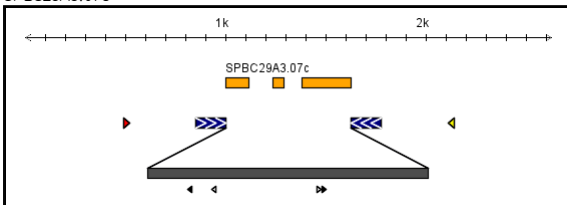

SPBC29A3.08

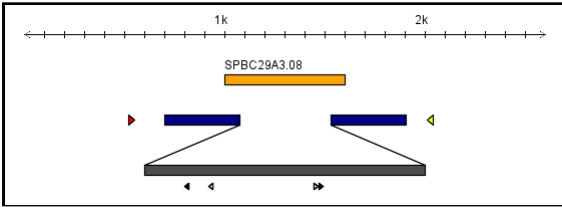

SPBC29A3.10c

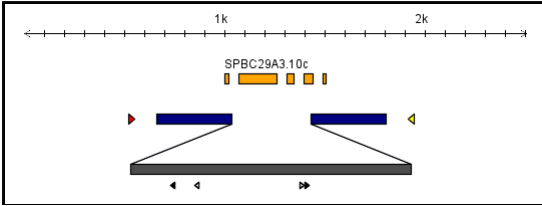

SPBC29A3.11c

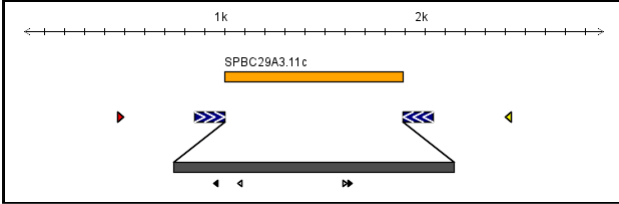

SPBC29A3.12

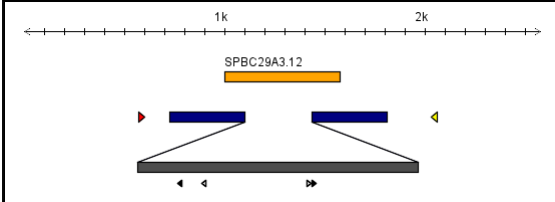

SPBC29A3.13

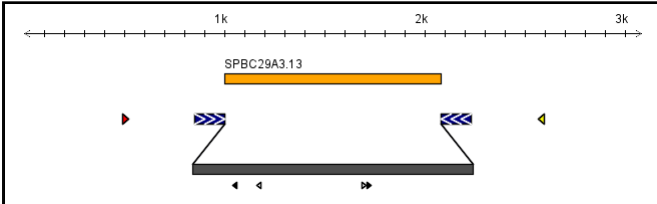

SPBC29A3.14c

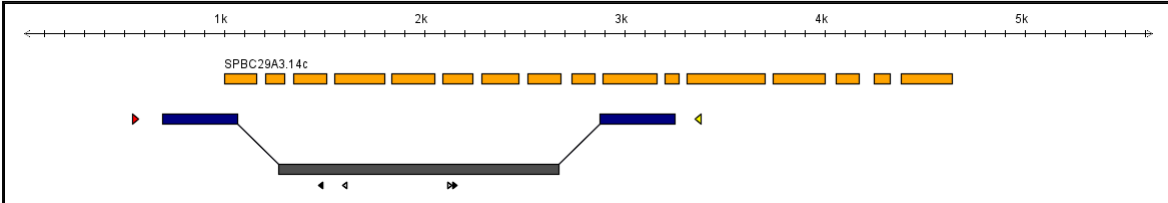

SPBC29A3.15c

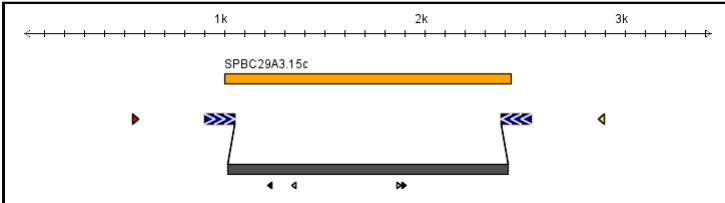

SPBC29A3.16

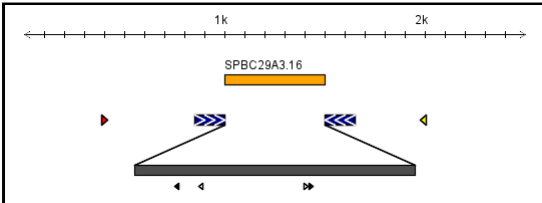

SPBC29A3.17

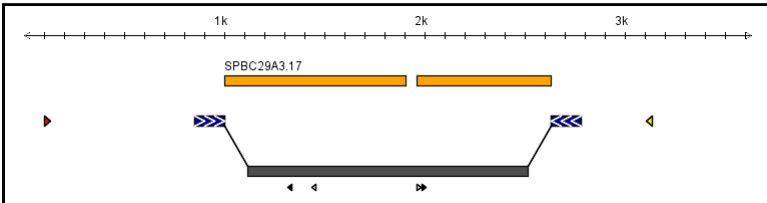

SPBC29A3.18

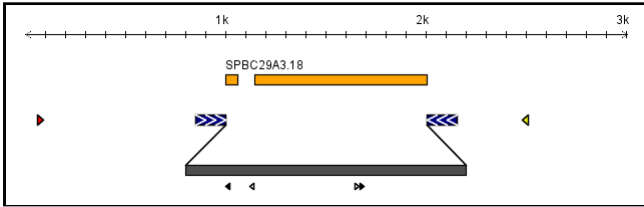

SPBC29A3.21

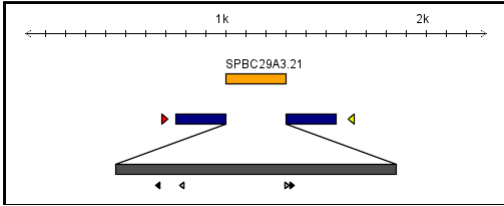

SPBC2A9.02

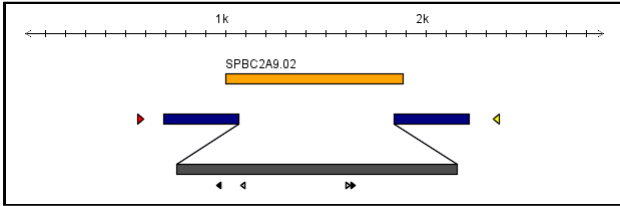

SPBC2A9.03

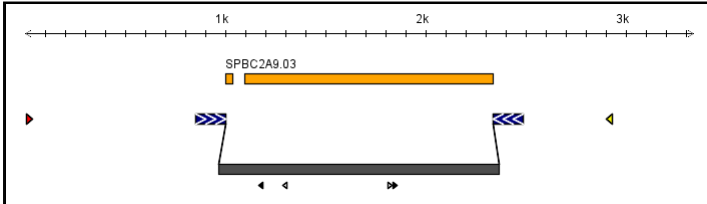

SPBC2A9.05c

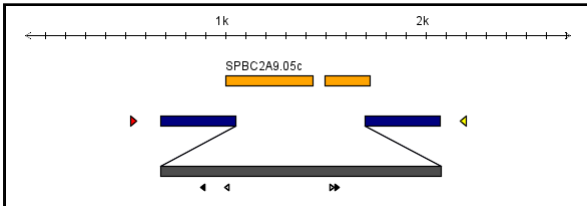

SPBC2A9.06c

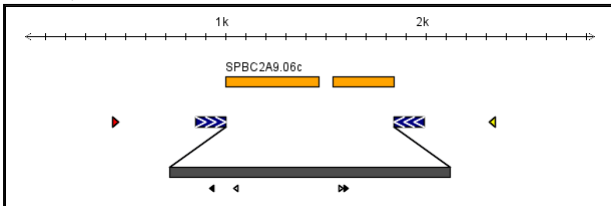

SPBC2A9.07c

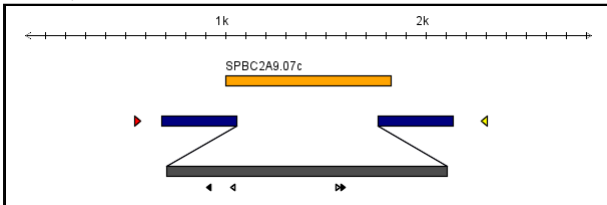

SPBC2A9.08c

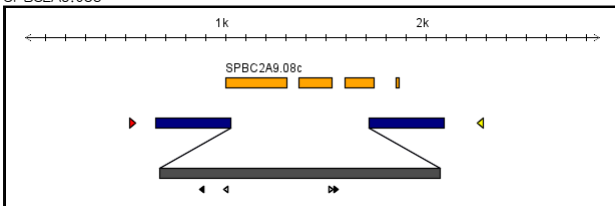

SPBC2A9.09

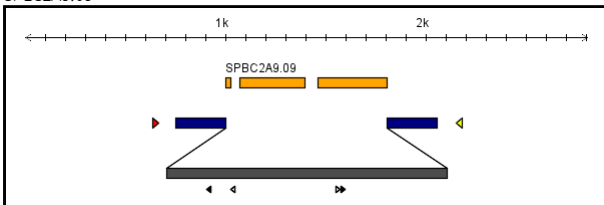

SPBC2A9.10

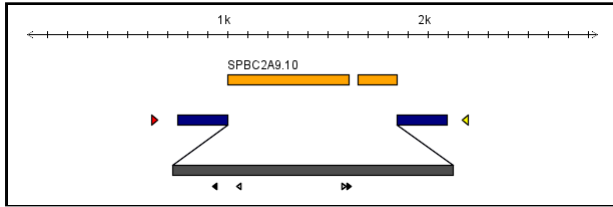

SPBC2A9.11c

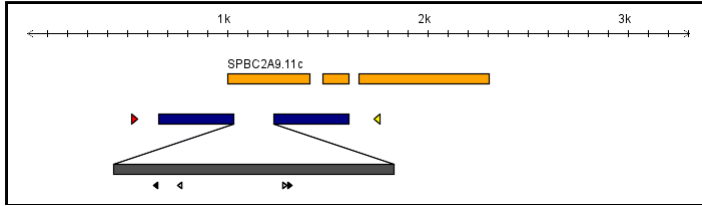

SPBC2A9.12

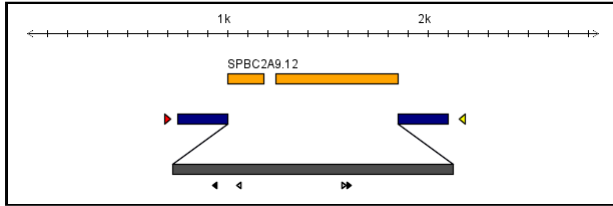

SPBC2A9.13

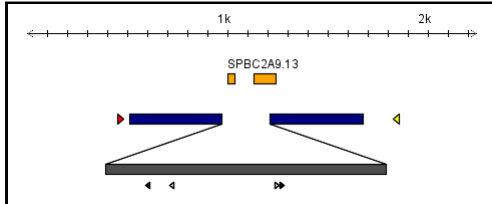

SPBC2D10.03c

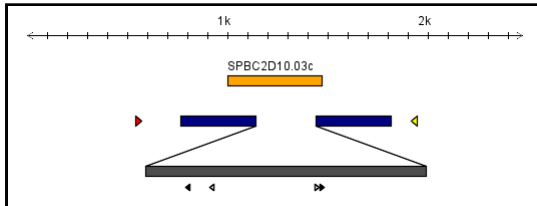

SPBC2D10.04

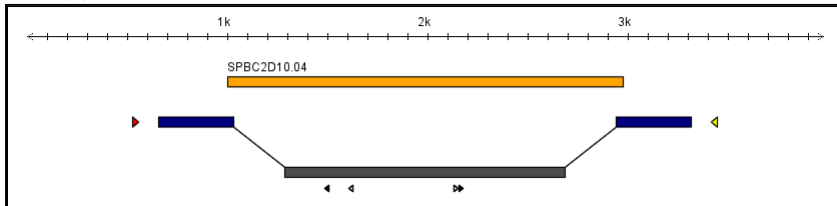

SPBC2D10.05

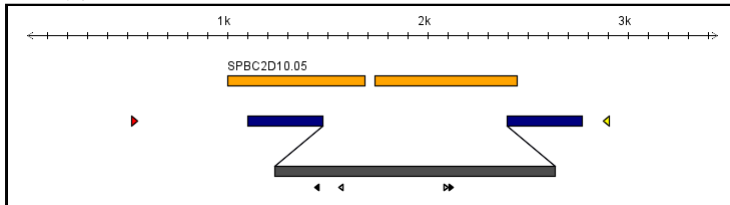

SPBC2D10.06

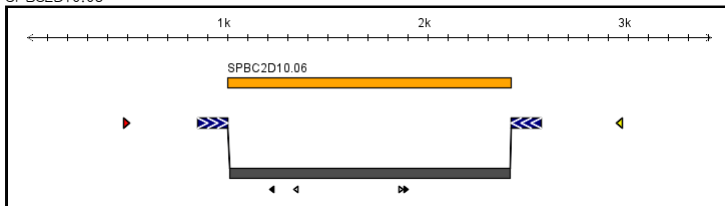

SPBC2D10.07c

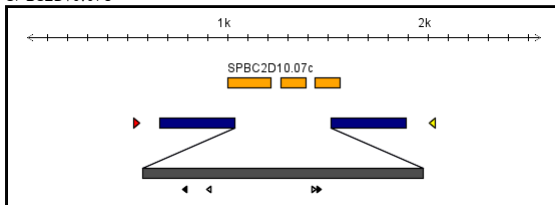

SPBC2D10.08c

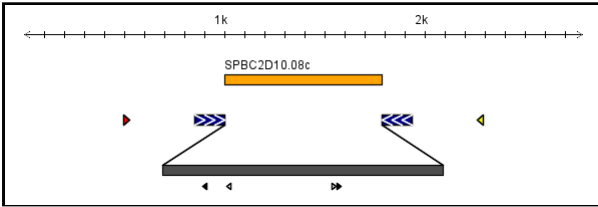

SPBC2D10.09

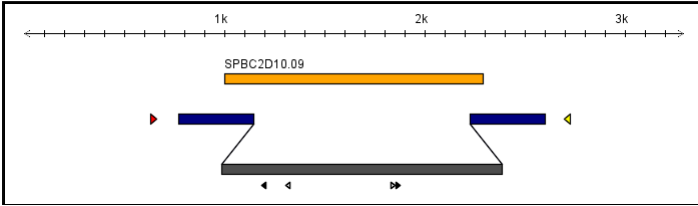

SPBC2D10.10c

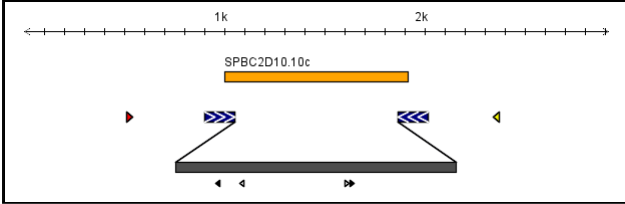

SPBC2D10.11c

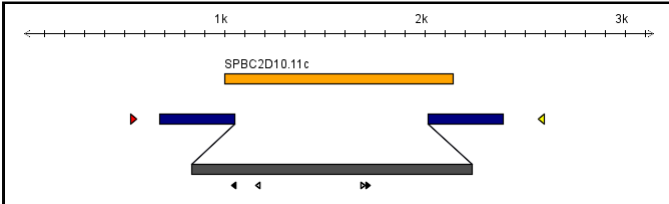

SPBC2D10.12

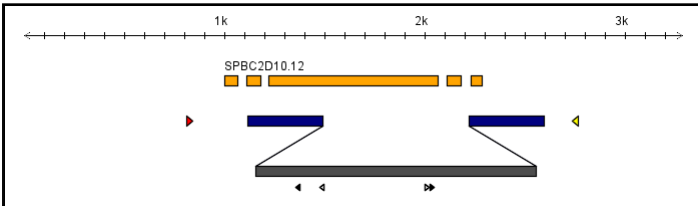

SPBC2D10.13

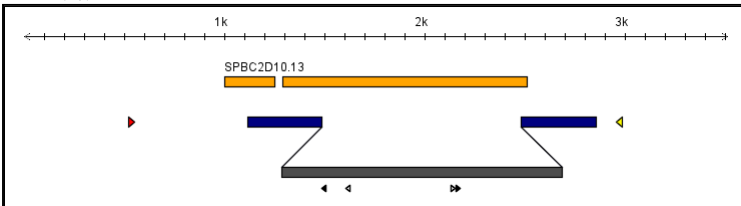

SPBC2D10.15c

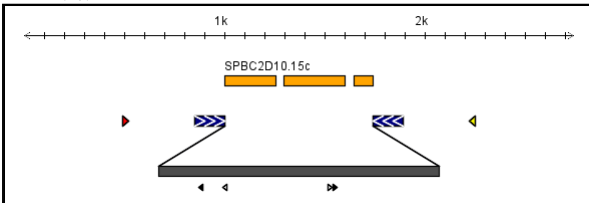

SPBC2D10.16

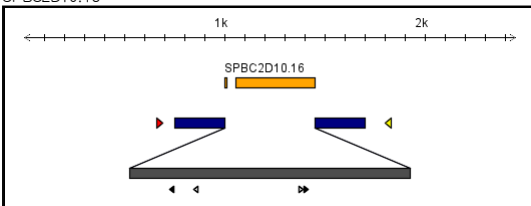

SPBC2D10.18

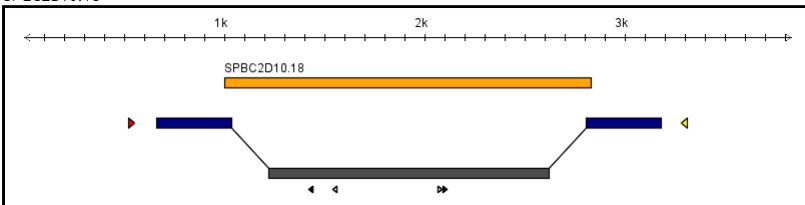



SPBC2D10.19c

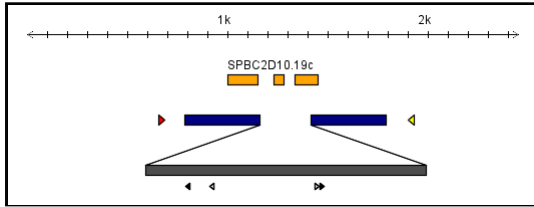

SPBC2D10.20

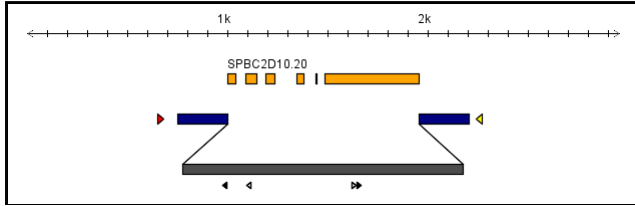

SPBC2F12.02c

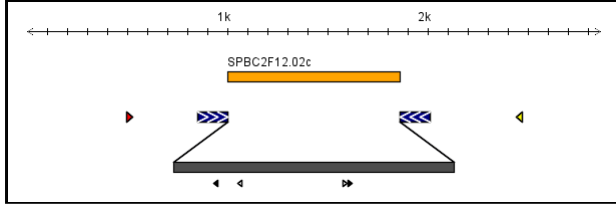

SPBC2F12.04

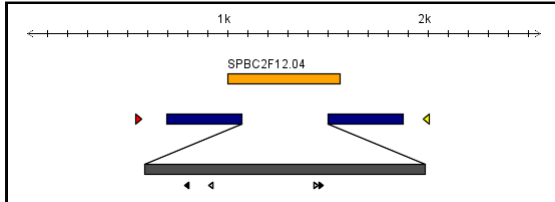

SPBC2F12.07c

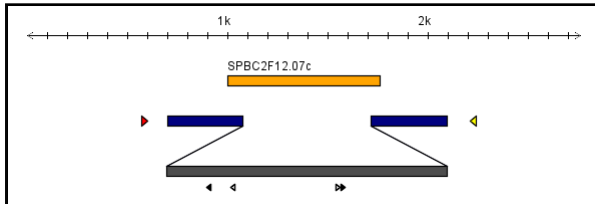

SPBC2F12.08c

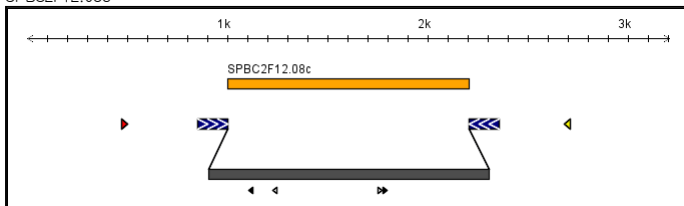

SPBC2F12.09c

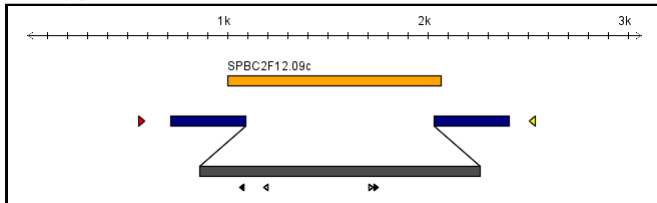

SPBC2F12.10

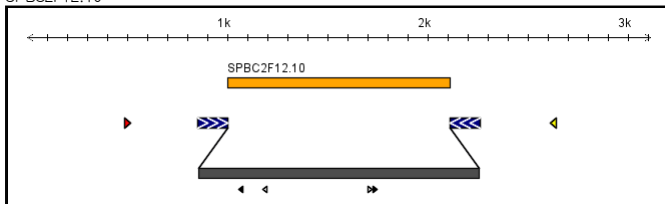

SPBC2F12.11c

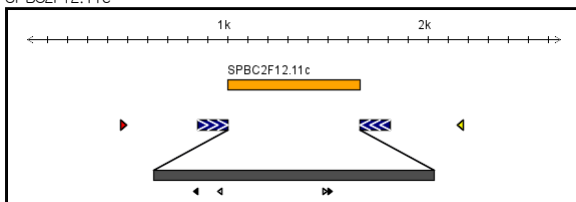

SPBC2F12.12c

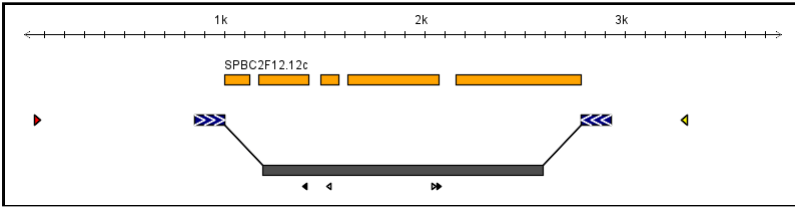

SPBC2F12.13

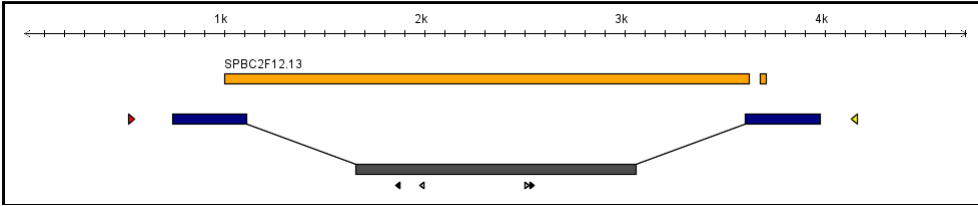

SPBC2F12.14c

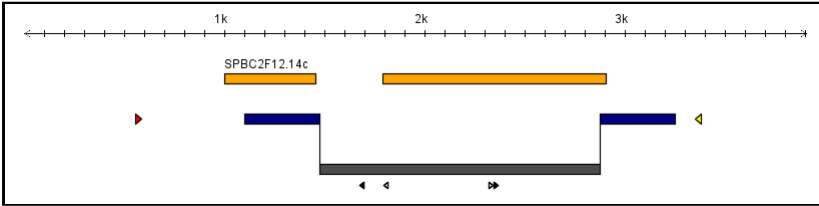

SPBC2F12.15c

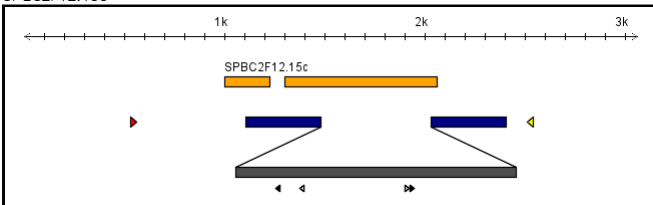

SPBC2G2.01c

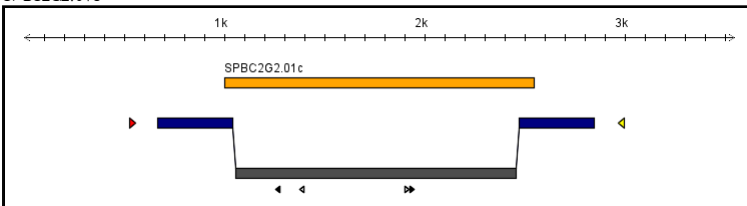

SPBC2G2.03c

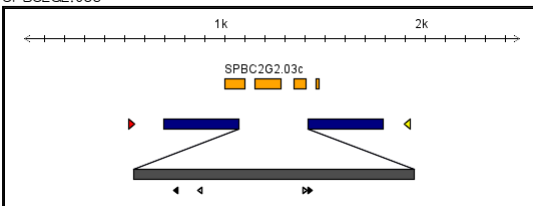

SPBC2G2.04c

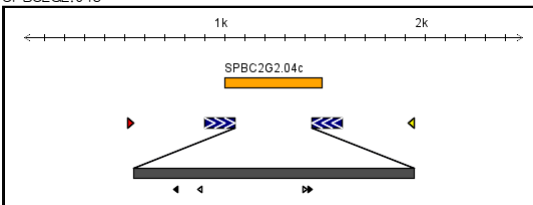

SPBC2G2.05

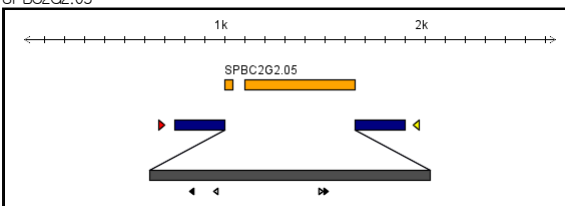

SPBC2G2.06c

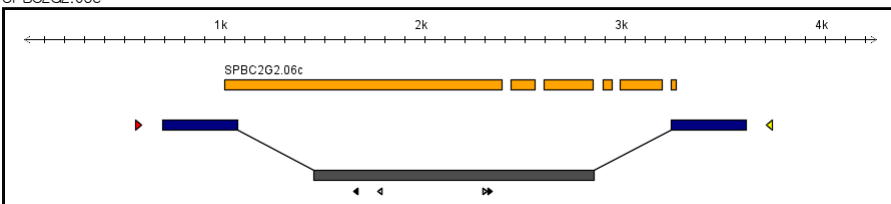

SPBC2G2.07c

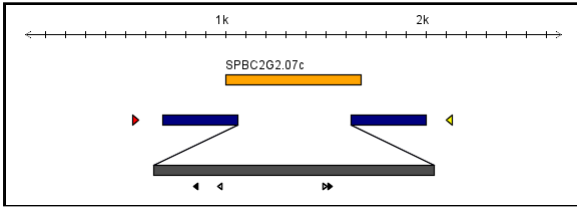

SPBC2G2.08

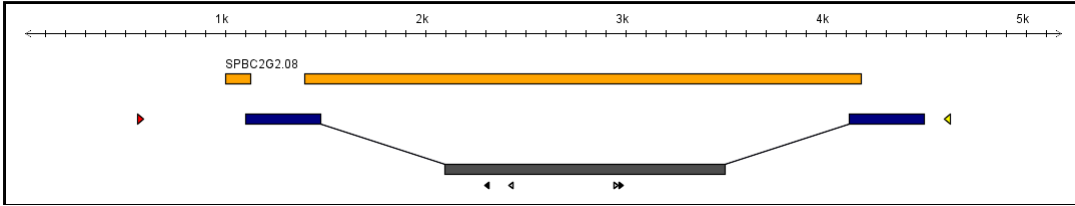

SPBC2G2.09c

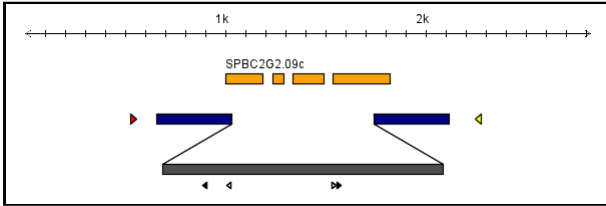

SPBC2G2.10c

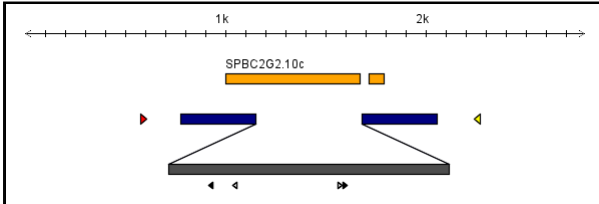

SPBC2G2.11

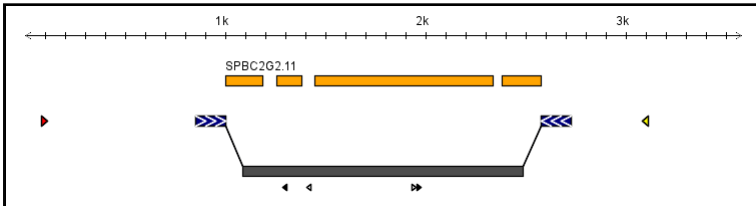

SPBC2G2.12

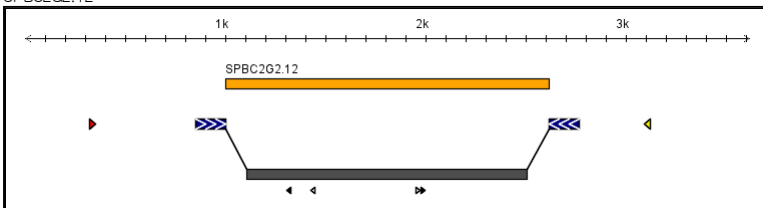

SPBC2G2.13c

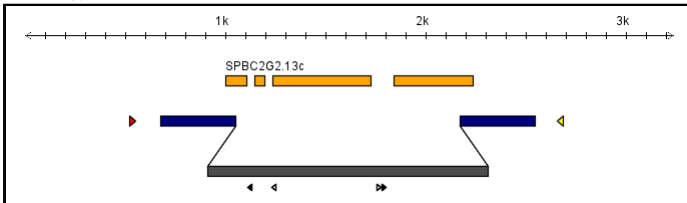

SPBC2G2.14

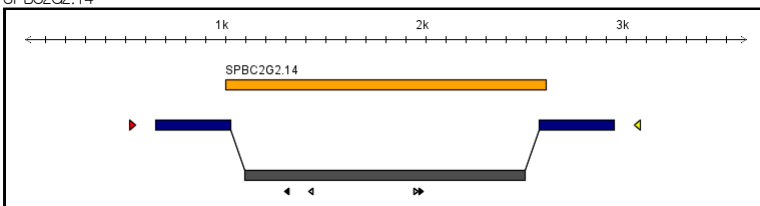

SPBC2G2.15c

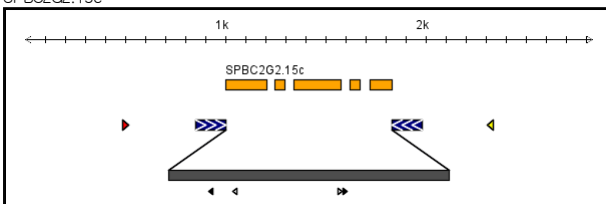

SPBC2G2.16

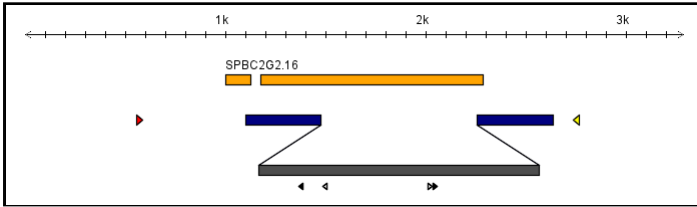

SPBC2G2.17c

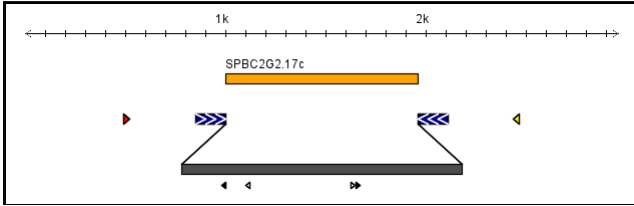

SPBC2G5.01

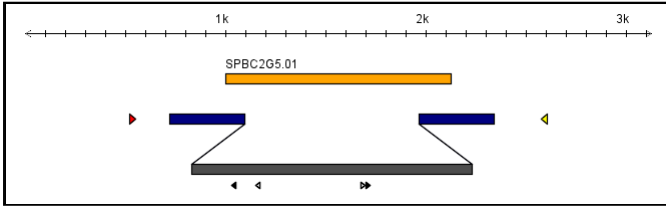

SPBC2G5.02c

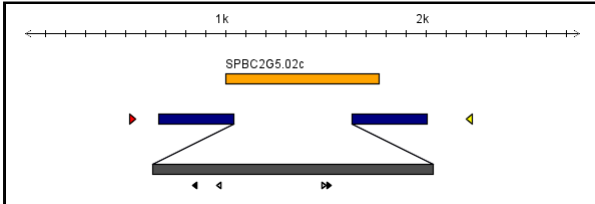

SPBC2G5.03

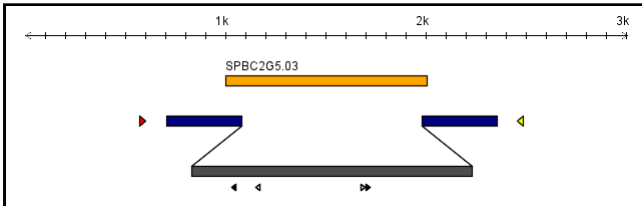

SPBC2G5.04c

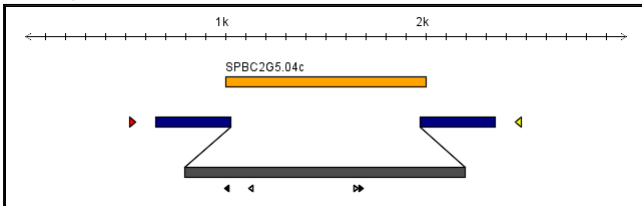

SPBC2G5.05

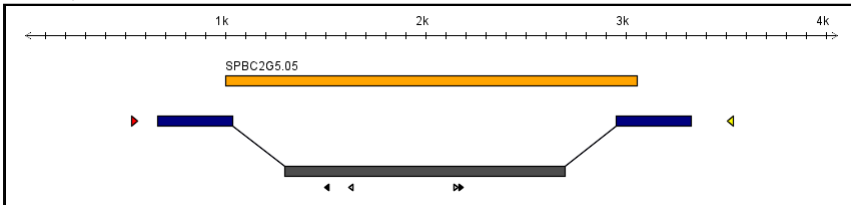

SPBC2G5.06c

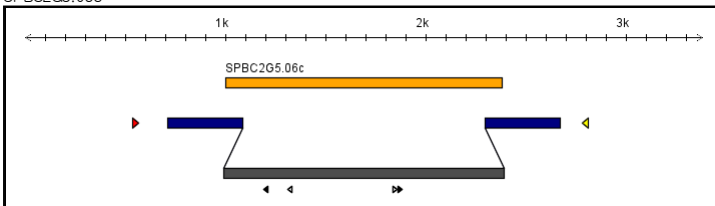

SPBC2G5.07c

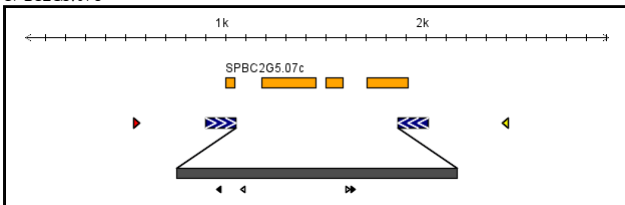

SPBC3B8.01c

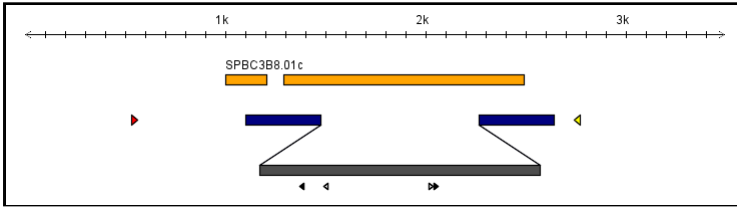

SPBC3B8.02

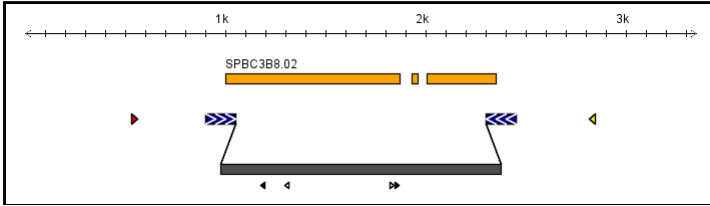

SPBC3B8.03

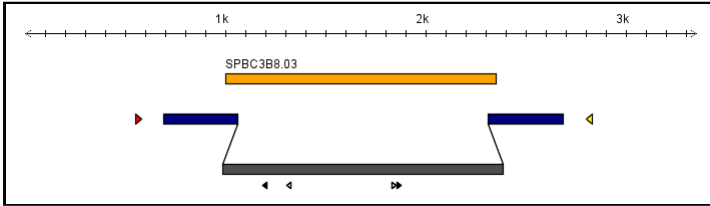

SPBC3B8.05

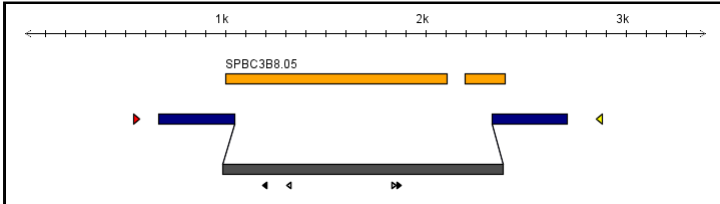

SPBC3B8.06

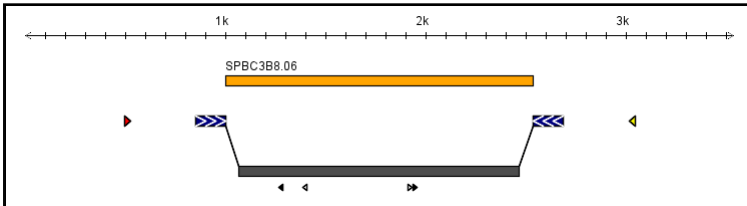

SPBC3B8.07c

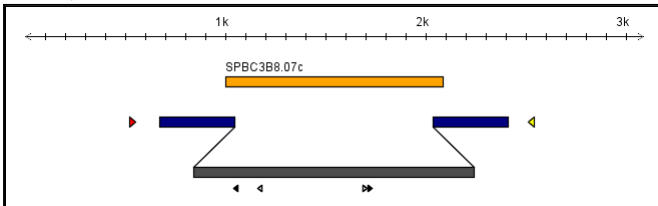

SPBC3B8.08

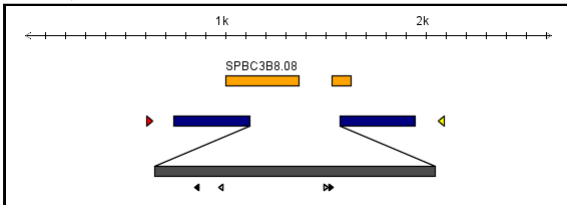

SPBC3B8.09

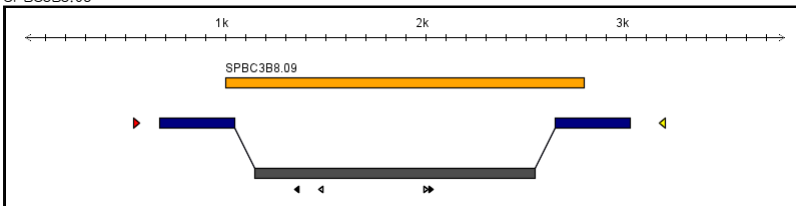

SPBC3B8.10c

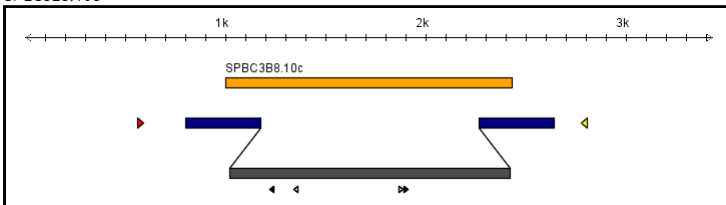

SPBC3B8.11

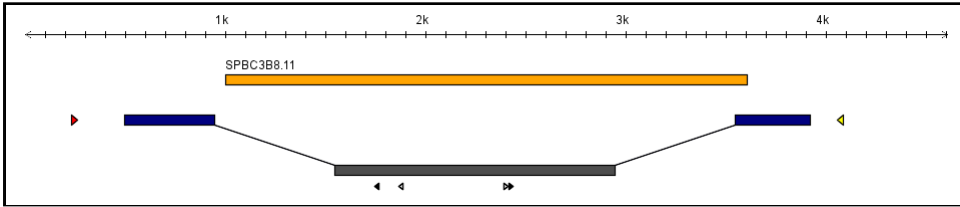

SPBC3B9.01

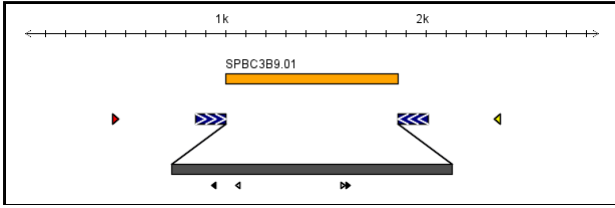

SPBC3B9.02c

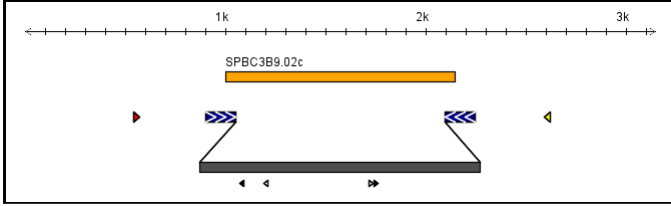

SPBC3B9.03

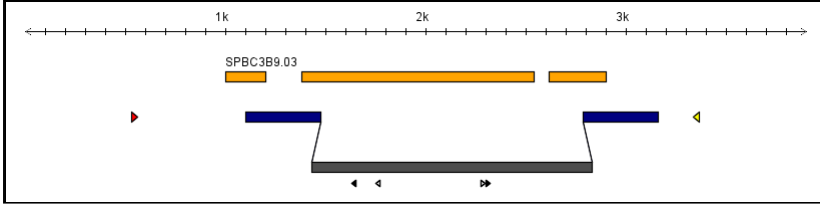

SPBC3B9.04

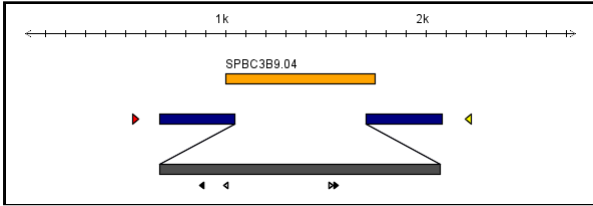

SPBC3B9.05

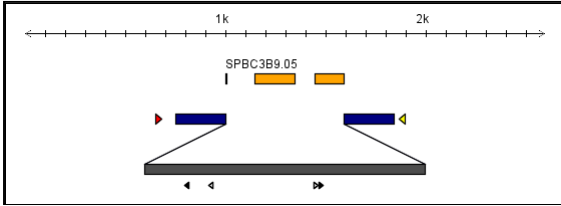

SPBC3B9.06c

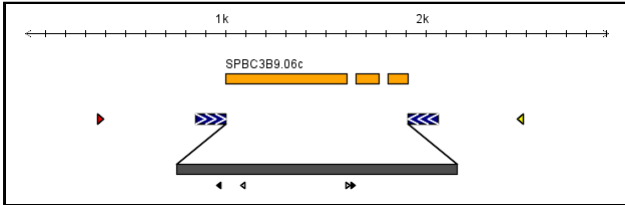

SPBC3B9.07c

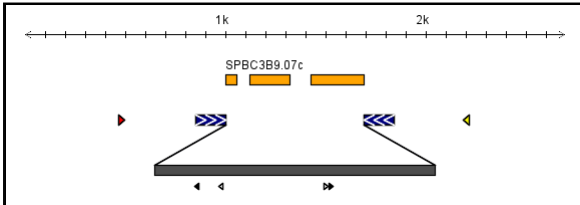

SPBC3B9.08c

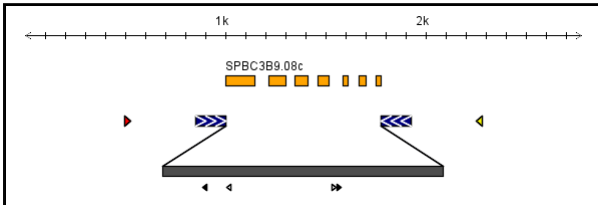

SPBC3B9.09

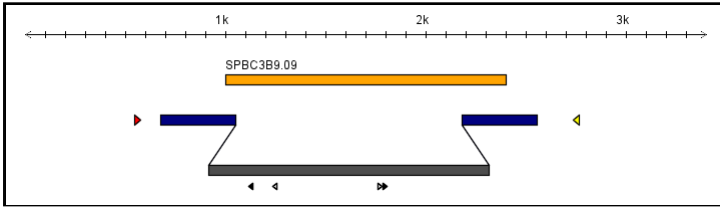

SPBC3B9.10

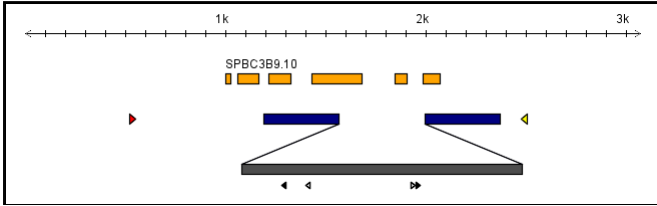

SPBC3B9.11c

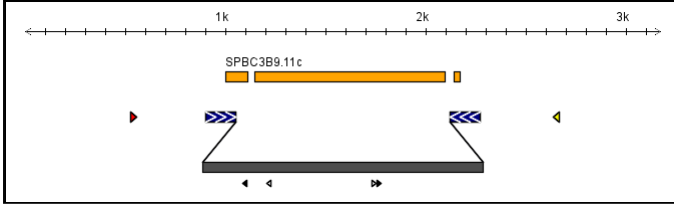

SPBC3B9.12

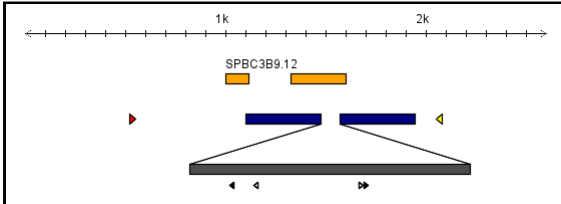

SPBC3B9.13c

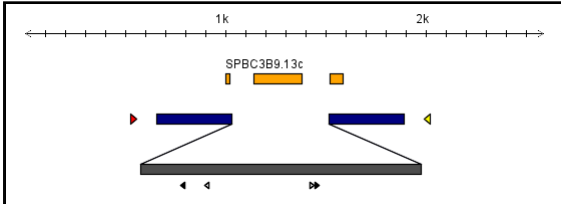

SPBC3B9.14c

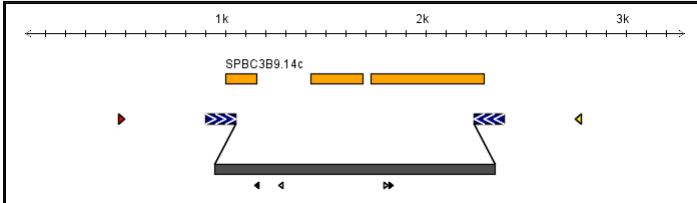

SPBC3B9.17

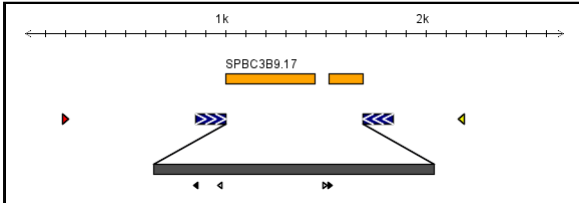

SPBC3B9.18c

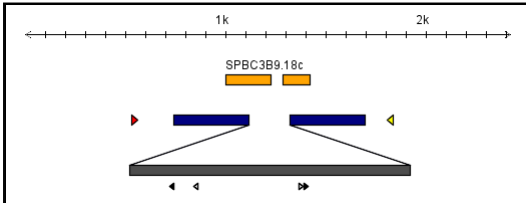

SPBC3B9.19

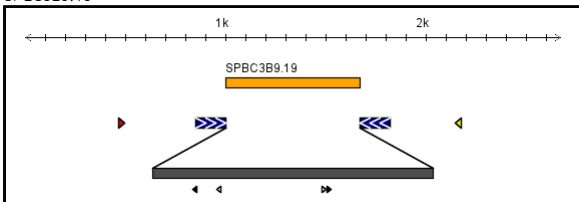

SPBC3B9.21

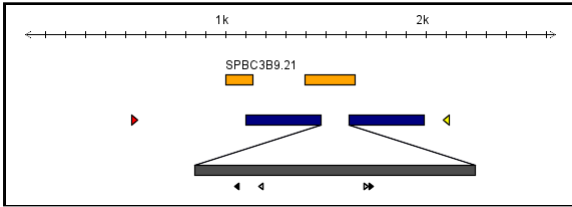

SPBC3D6.02

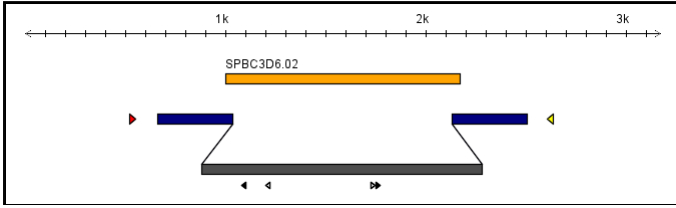

SPBC3D6.03c

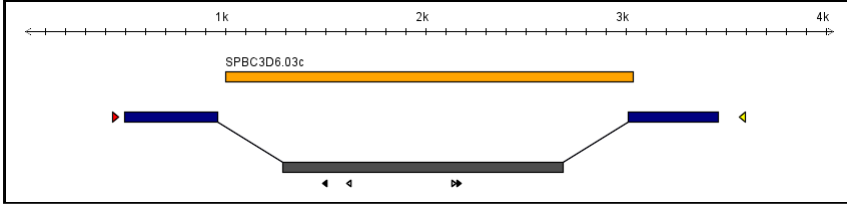

SPBC3D6.04c

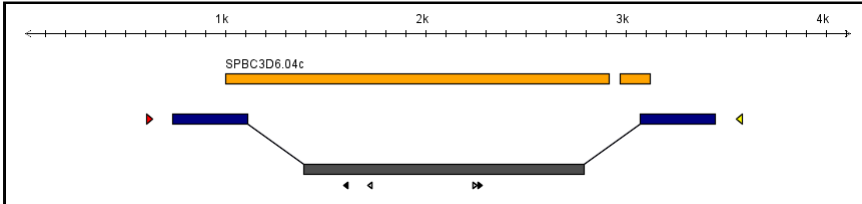

SPBC3D6.05

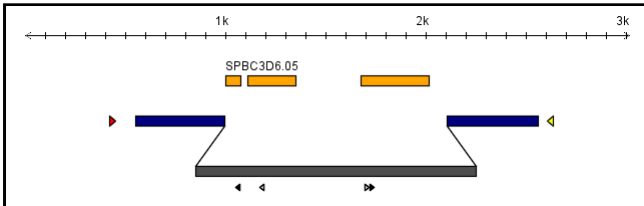

SPBC3D6.06c

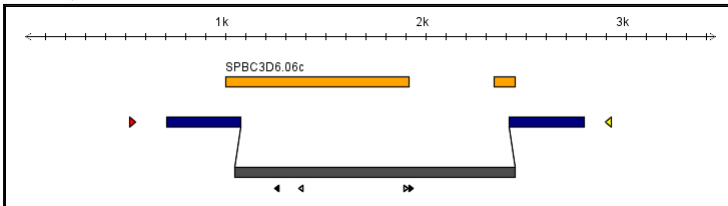

SPBC3D6.07

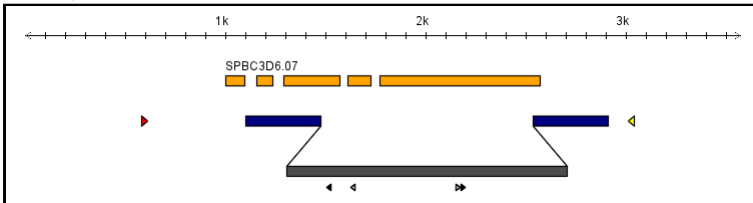

SPBC3D6.08c

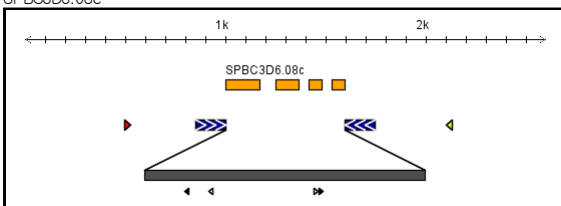

SPBC3D6.09

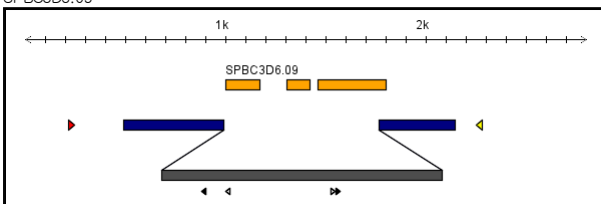



SPBC3D6.10

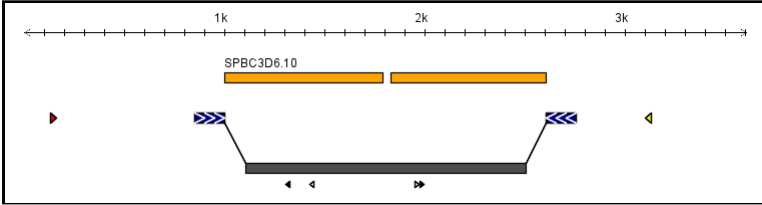

SPBC3D6.11c

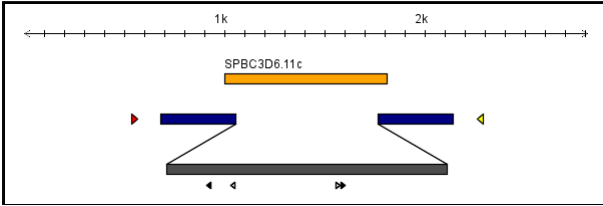

SPBC3D6.13c

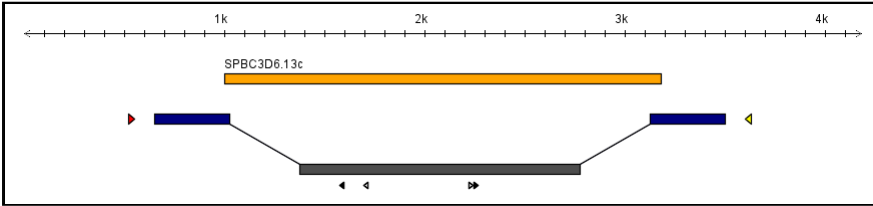

SPBC3D6.15

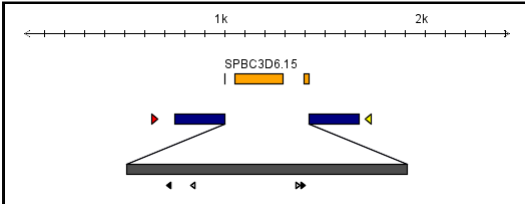

SPBC3E7.01

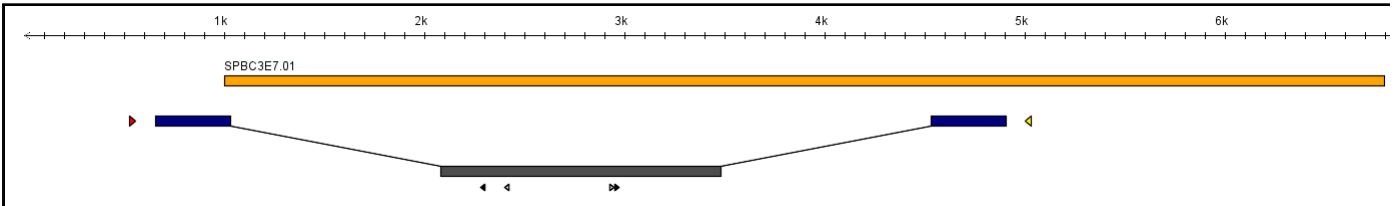

SPBC3E7.02c

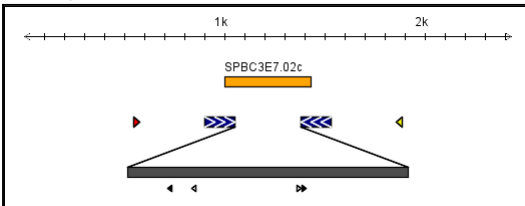

SPBC3E7.05c

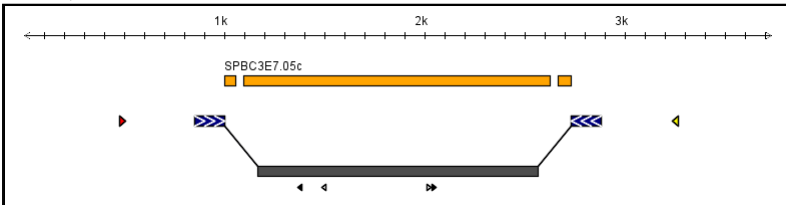

SPBC3E7.06c

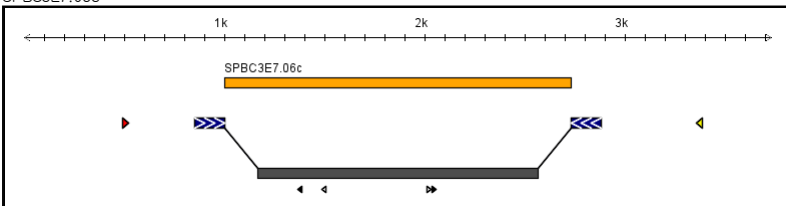

SPBC3E7.07c

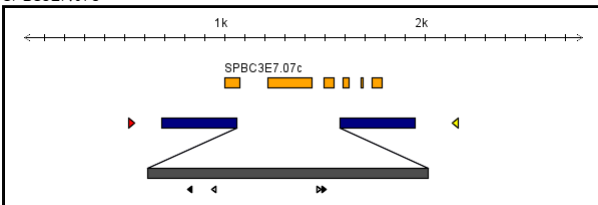

SPBC3E7.09

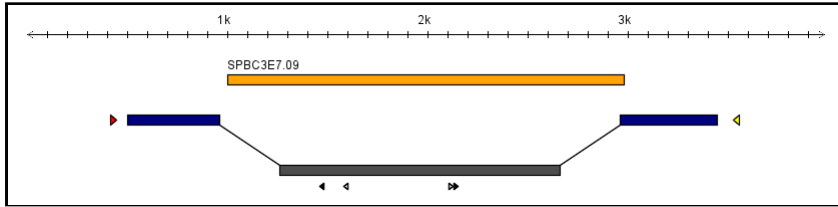

SPBC3E7.10

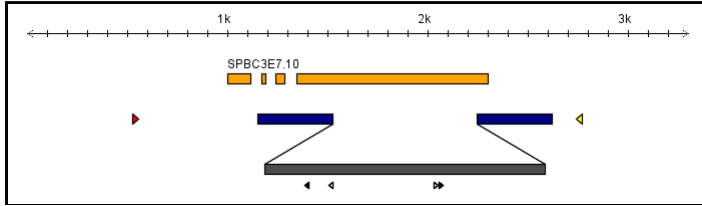

SPBC3E7.11c

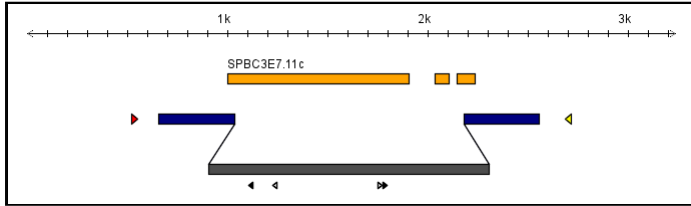

SPBC3E7.12c

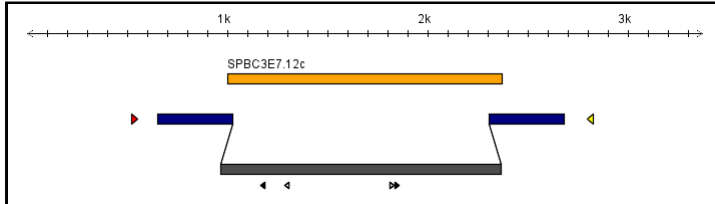

SPBC3E7.13c

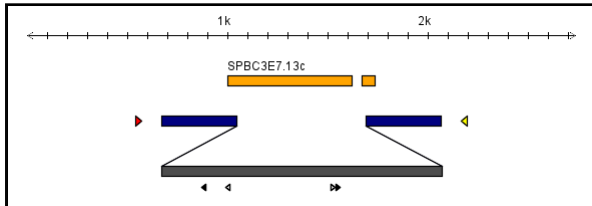

SPBC3E7.14

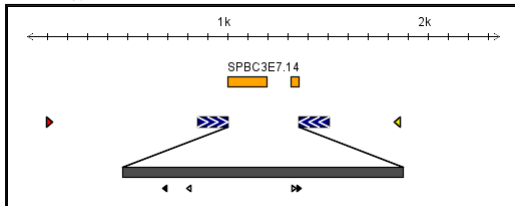

SPBC3E7.15c

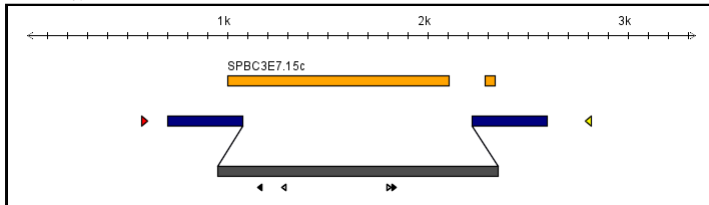

SPBC3E7.16c

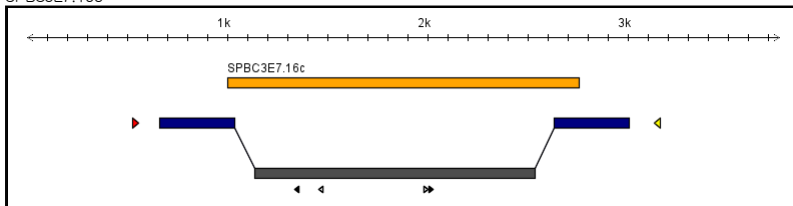

SPBC3F6.01c

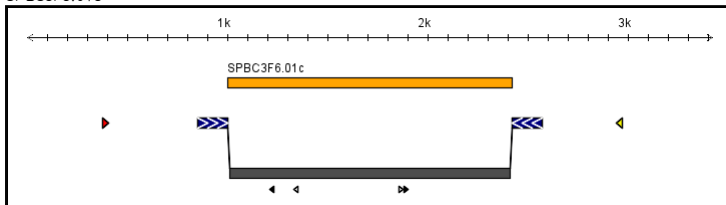

SPBC3F6.02c

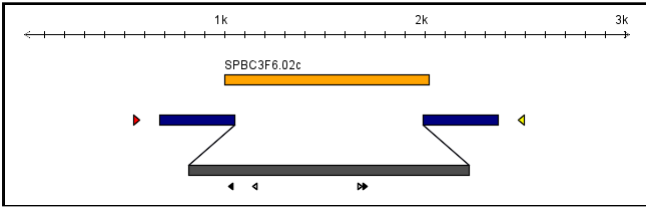

SPBC3F6.03

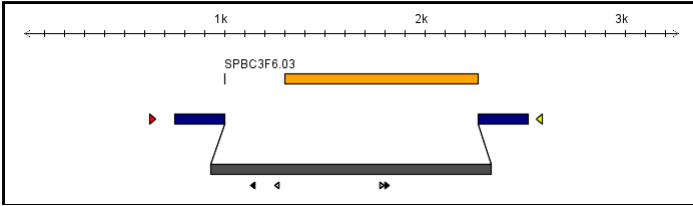

SPBC3H7.01

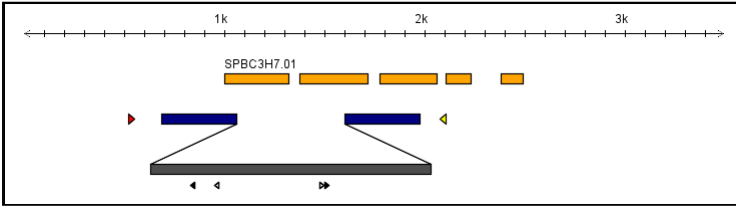

SPBC3H7.04

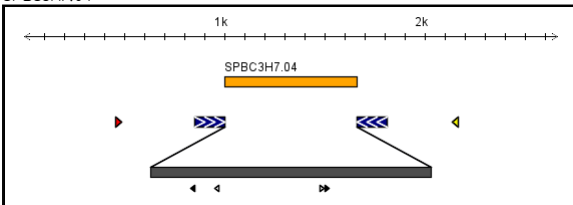

SPBC3H7.05c

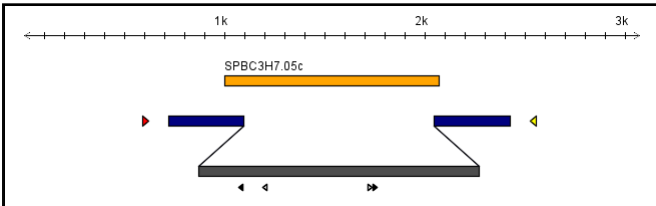

SPBC3H7.06c

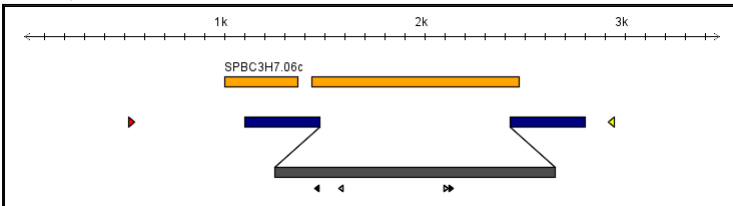

SPBC3H7.07c

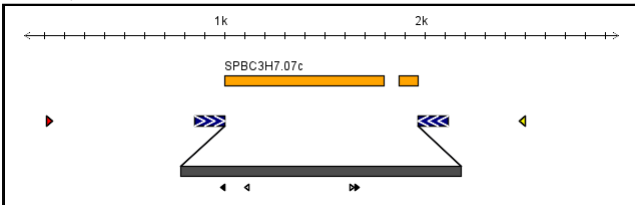

SPBC3H7.08c

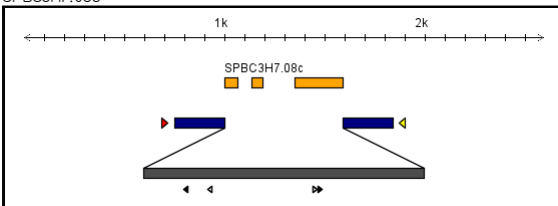

SPBC3H7.09

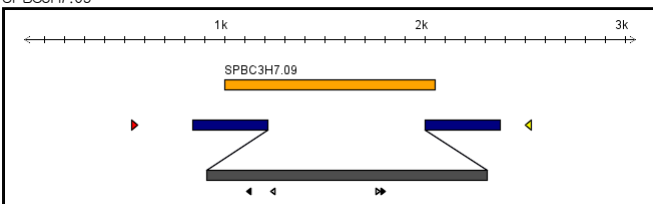

SPBC3H7.10

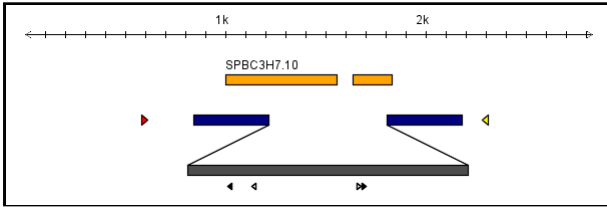

SPBC3H7.11

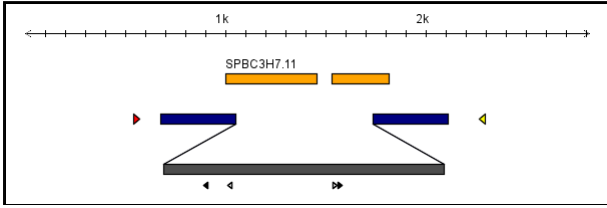

SPBC3H7.12

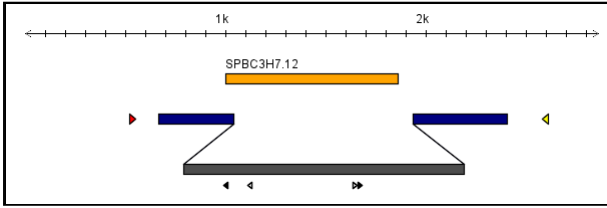

SPBC3H7.13

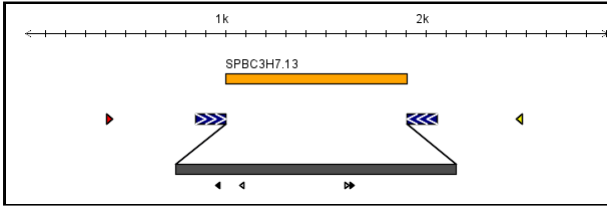

SPBC3H7.14

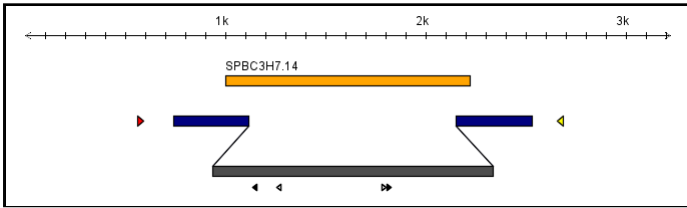

SPBC3H7.15

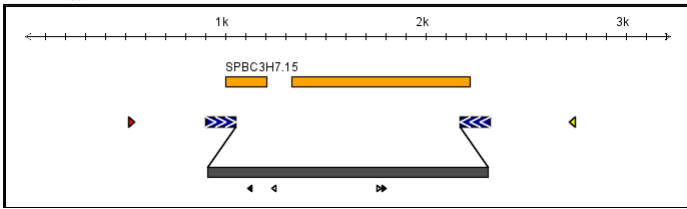

SPBC4.01

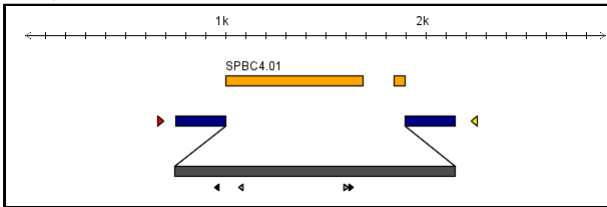

SPBC4.02c

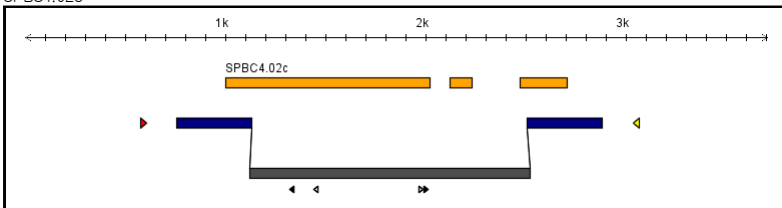

SPBC4.05

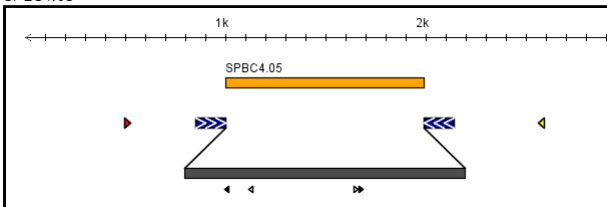

SPBC4.06

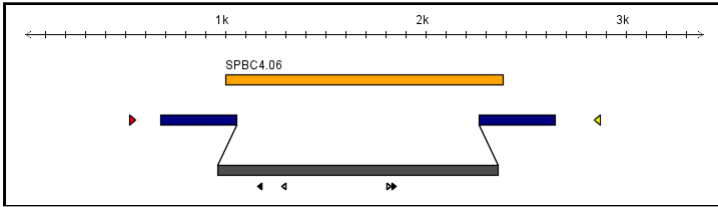

SPBC4.07c

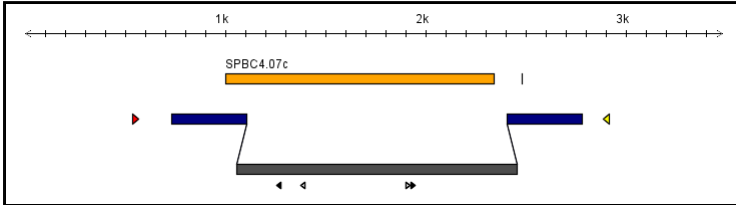

SPBC4B4.01c

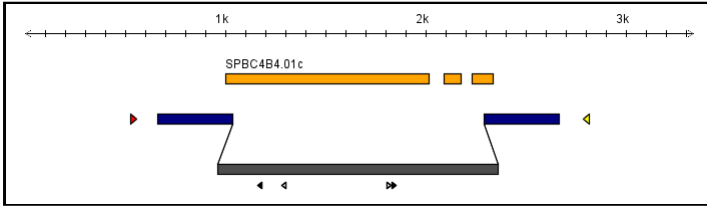

SPBC4B4.02c

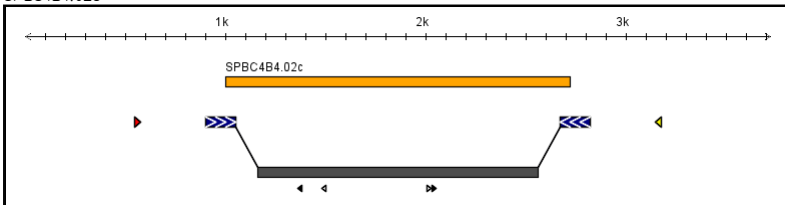

SPBC4B4.03

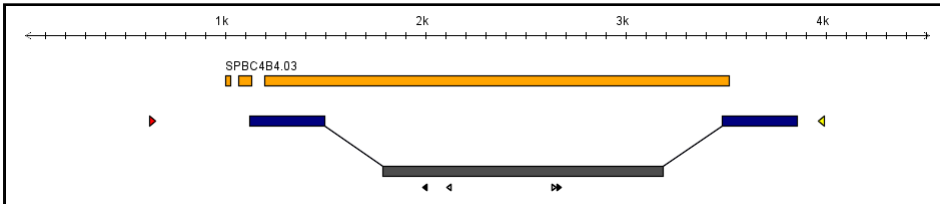

SPBC4B4.04

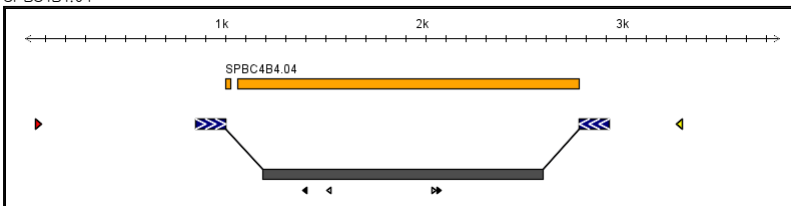

SPBC4B4.05

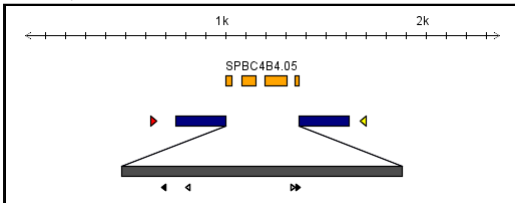

SPBC4B4.06

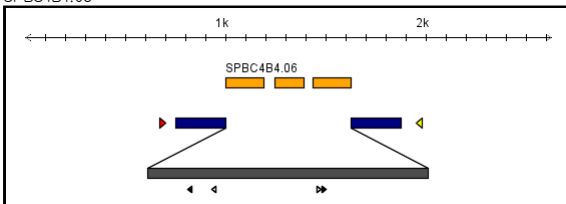

SPBC4B4.07c

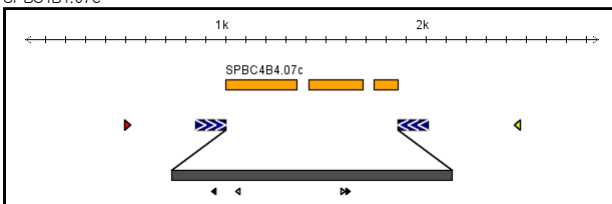

SPBC4B4.08

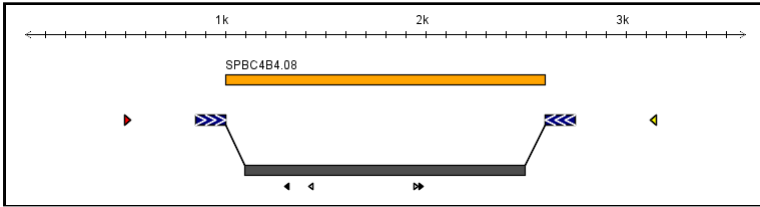

SPBC4B4.09

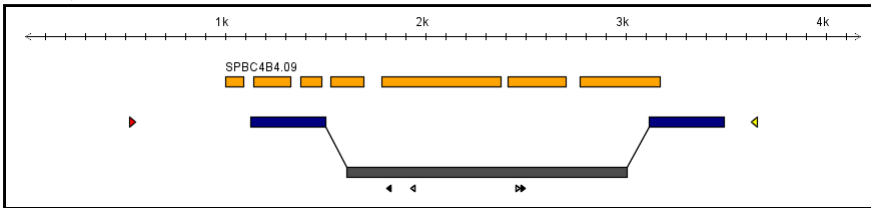

SPBC4B4.10c

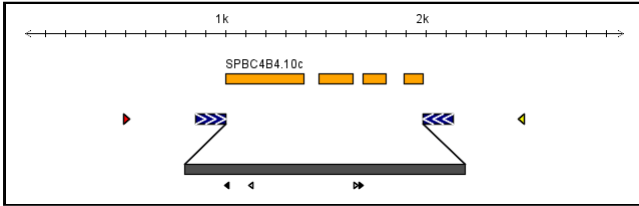

SPBC4B4.11

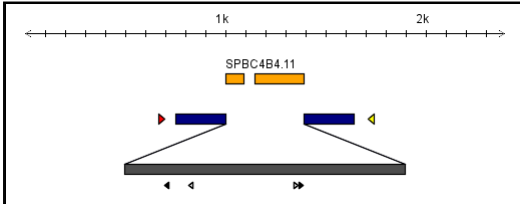

SPBC4B4.12c

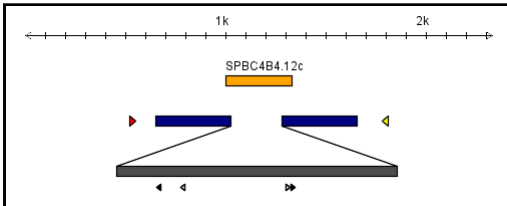

SPBC4C3.03

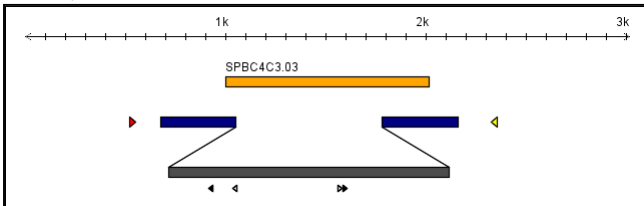

SPBC4C3.04c

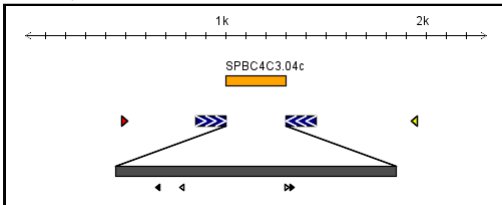

SPBC4C3.06

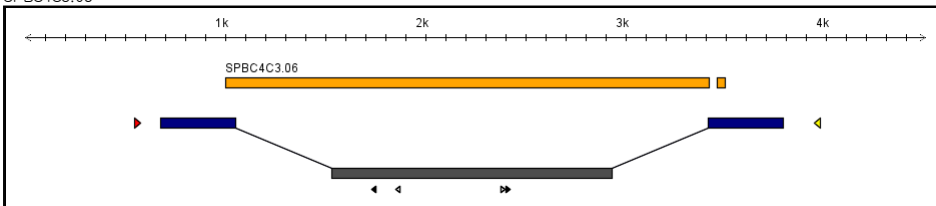

SPBC4C3.07

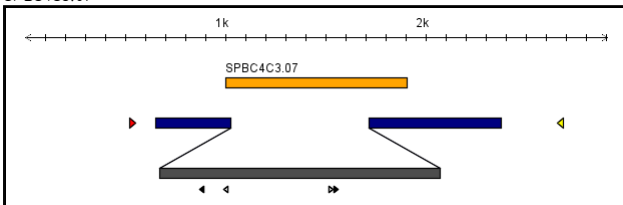

SPBC4C3.08

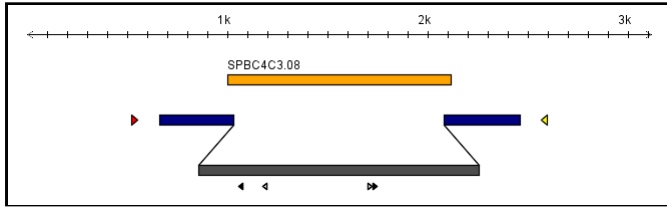

SPBC4C3.09

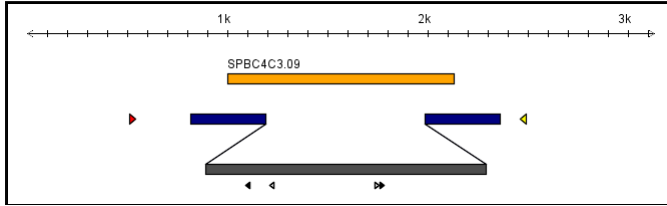

SPBC4C3.10c

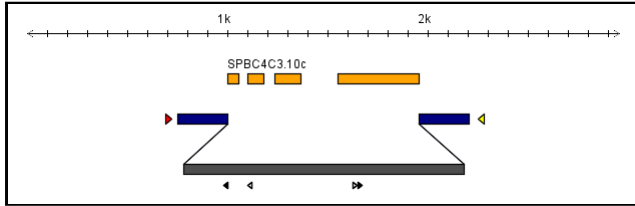

SPBC4C3.12

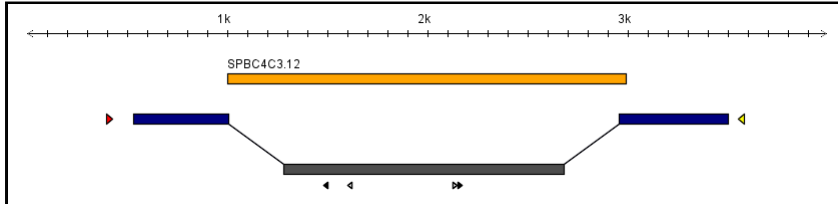

SPBC4F6.04

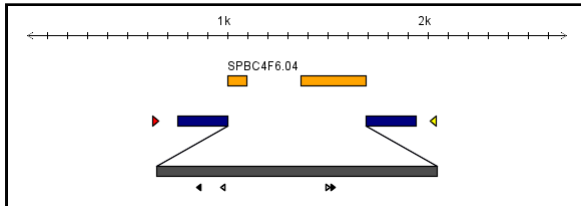

SPBC4F6.05c

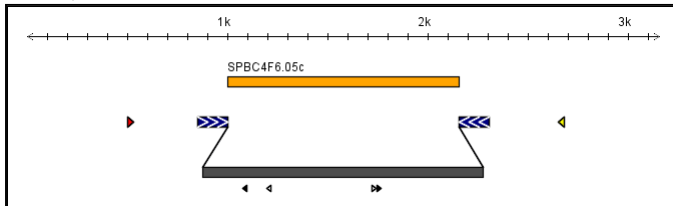

SPBC4F6.07c

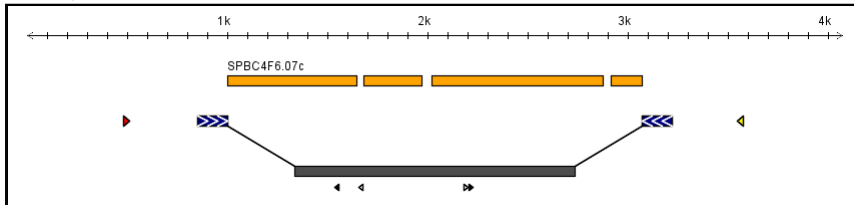

SPBC4F6.08c

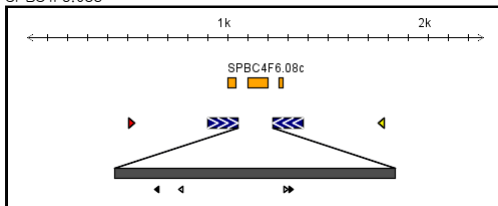

SPBC4F6.09

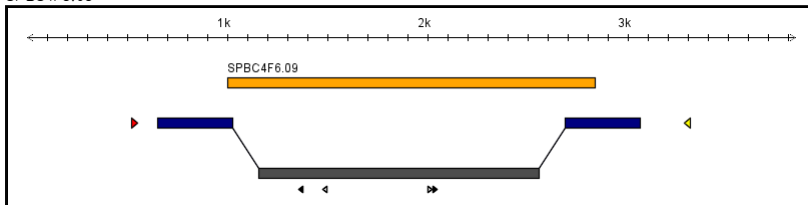

SPBC4F6.10

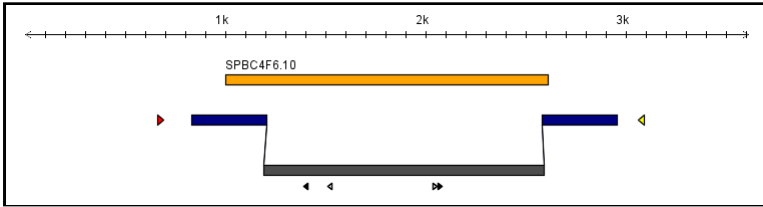

SPBC4F6.11c

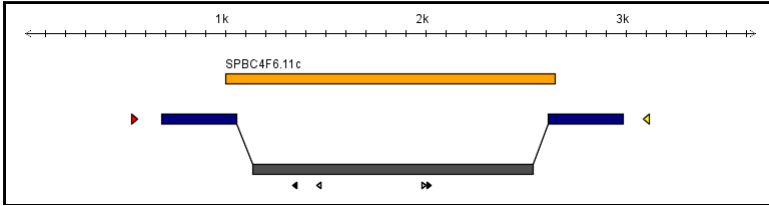

SPBC4F6.12

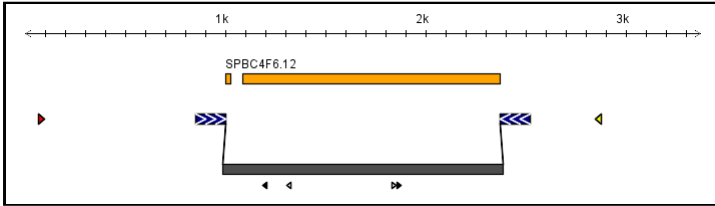

SPBC4F6.14

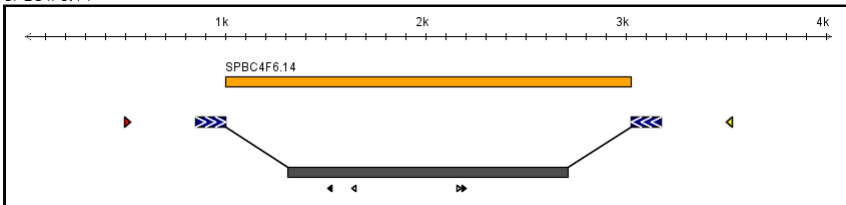

SPBC4F6.15c

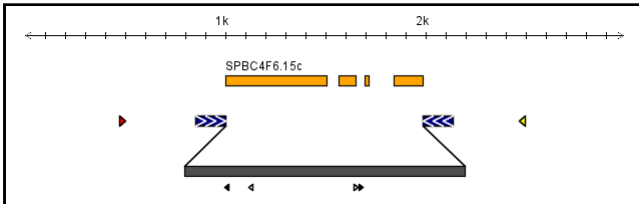

SPBC4F6.16c

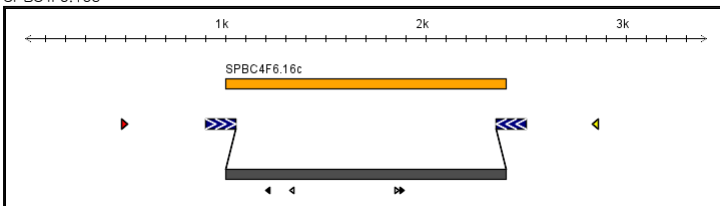

SPBC4F6.18c

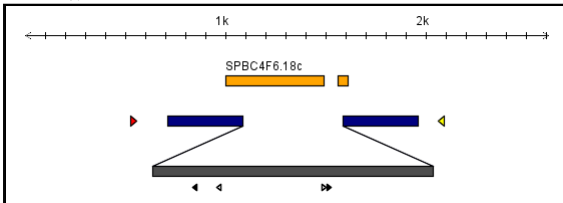

SPBC6B1.03c

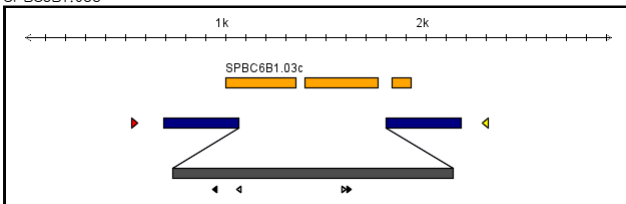

SPBC6B1.04

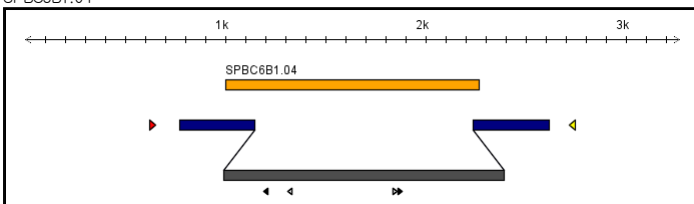



SPBC6B1.05c

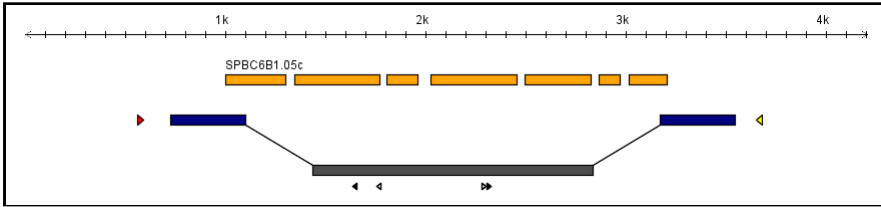

SPBC6B1.06c

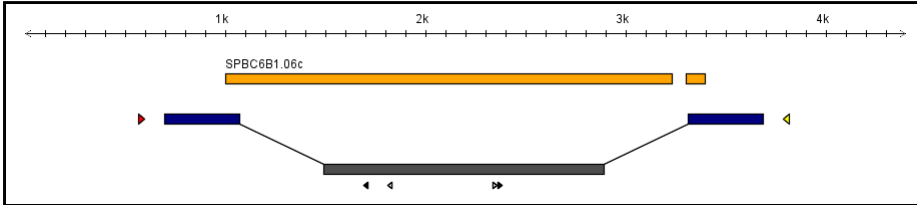

SPBC6B1.08c

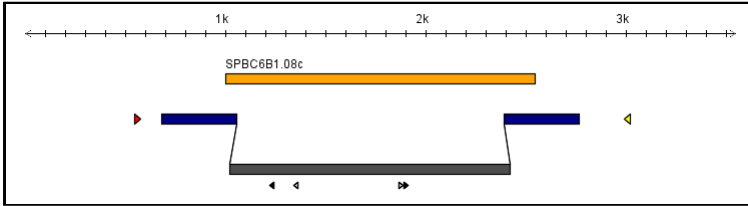

SPBC6B1.09c

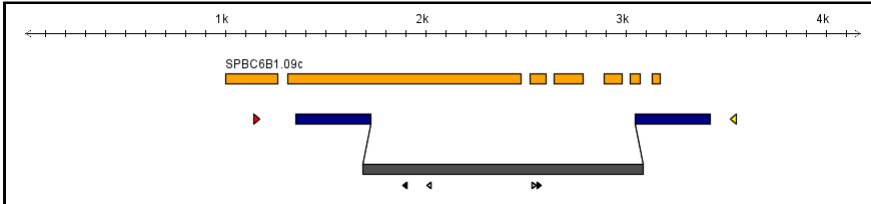

SPBC6B1.10

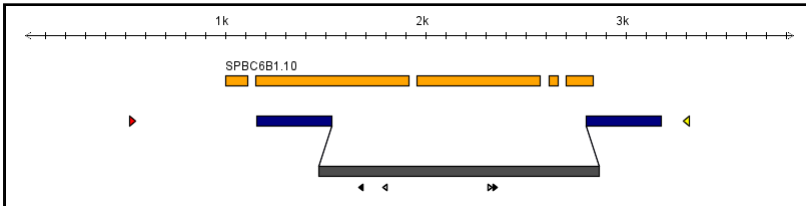

SPBC8D2.01

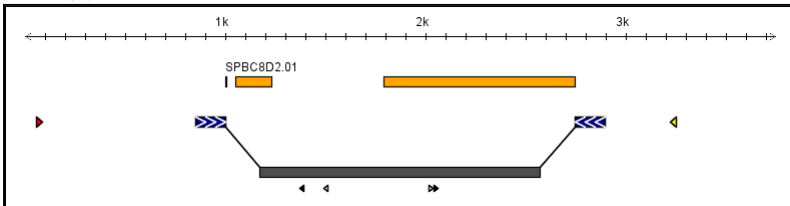

SPBC8D2.02c

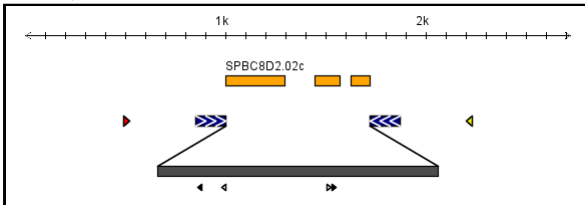

SPBC8D2.03c

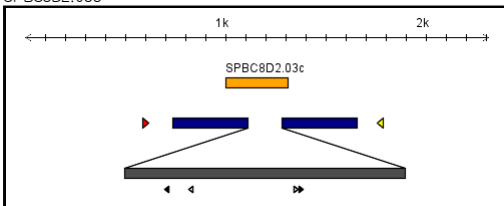

SPBC8D2.04

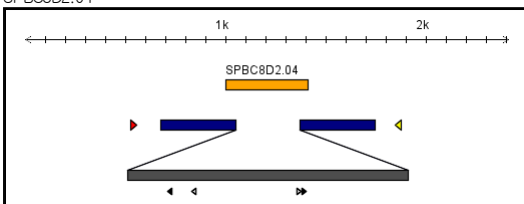

SPBC8D2.05c

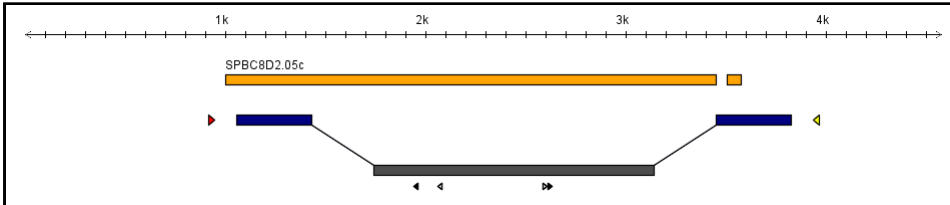

SPBC8D2.07c

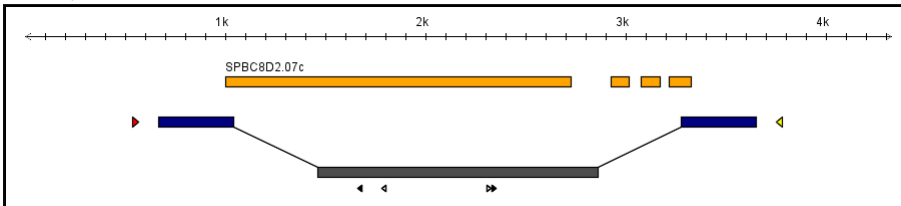

SPBC8D2.09c

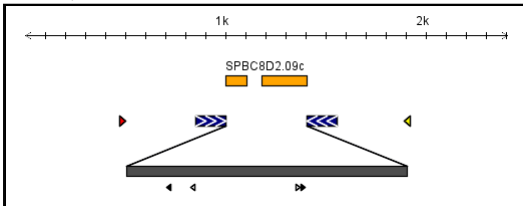

SPBC8D2.10c

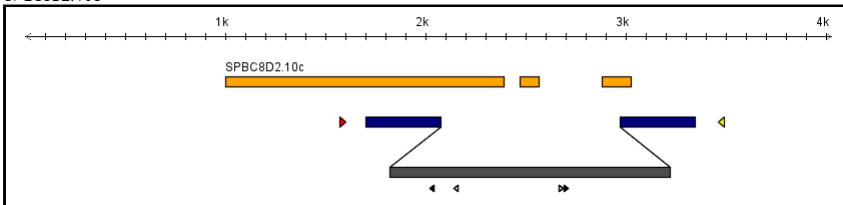

SPBC8D2.11

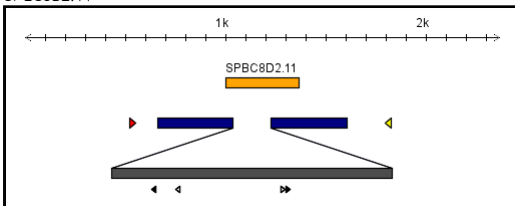

SPBC8D2.12c

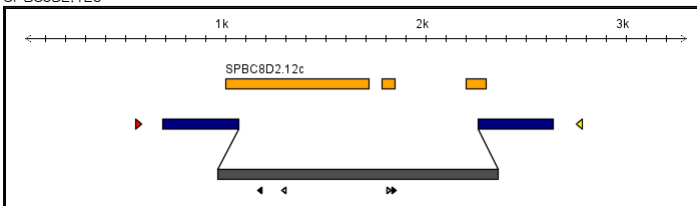

SPBC8D2.13

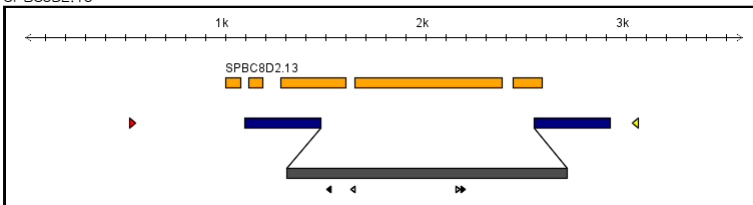

SPBC8D2.14c

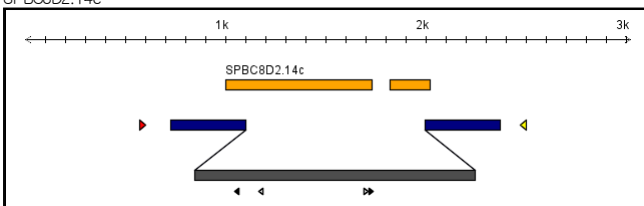

SPBC8D2.15

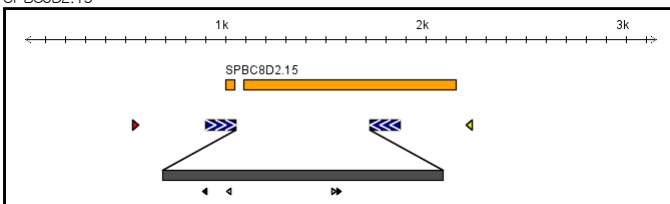

SPBC8D2.16c

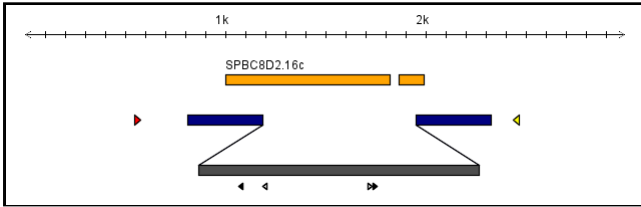

SPBC8D2.17

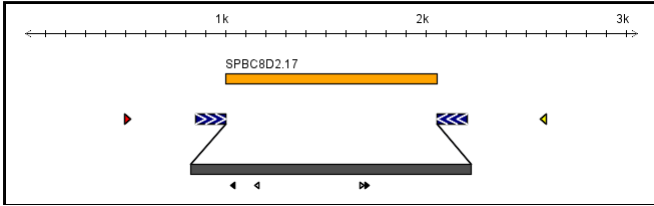

SPBC8D2.18c

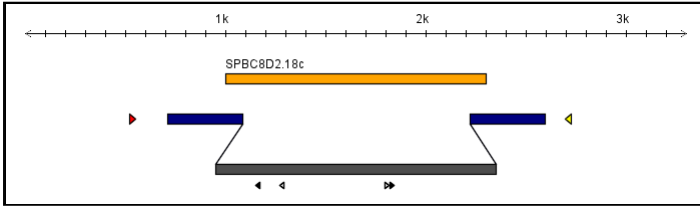

SPBC8D2.19

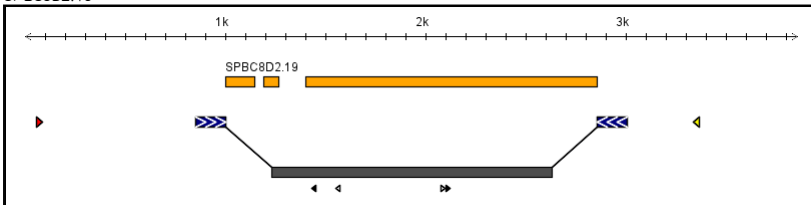

SPBC8D2.20c

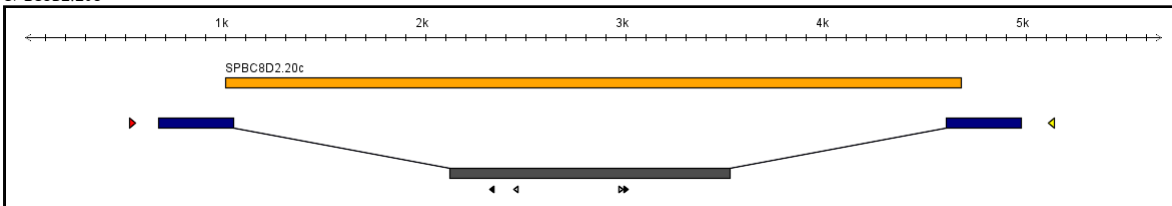

SPBC8E4.01c

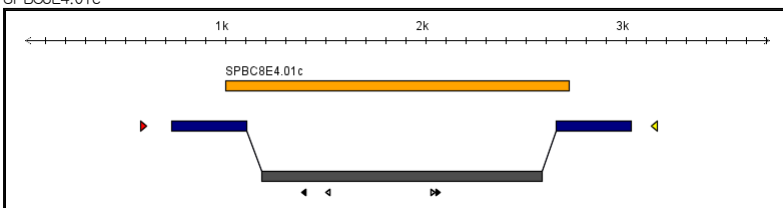

SPBC8E4.02c

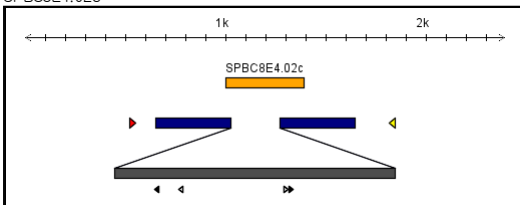

SPBC8E4.03

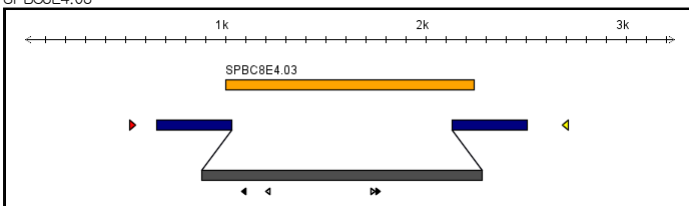

SPBC8E4.04

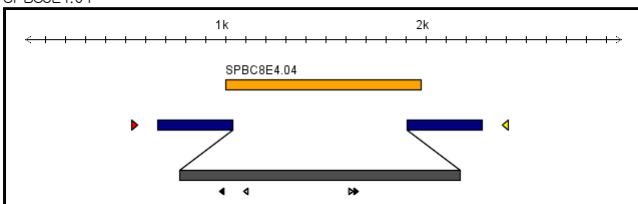

SPBC8E4.05c

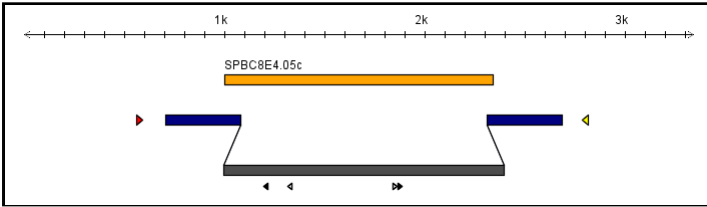

SPBC9B6.03

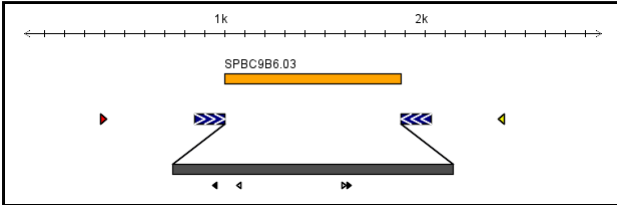

SPBC9B6.04c

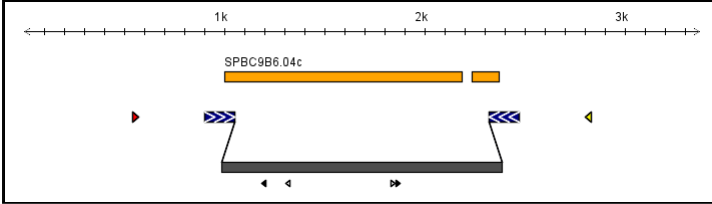

SPBC9B6.05c

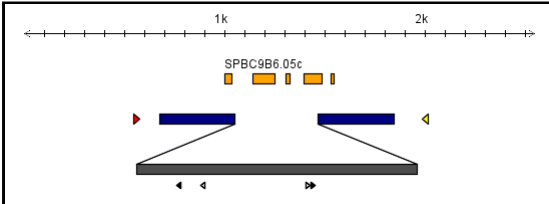

SPBC9B6.06

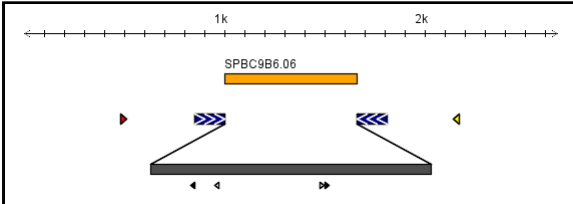

SPBC9B6.07

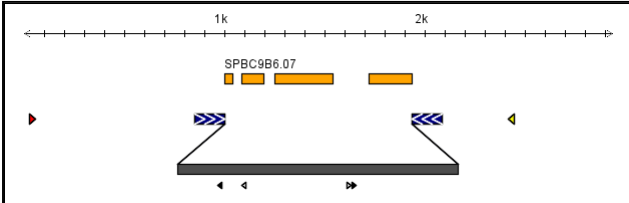

SPBC9B6.08

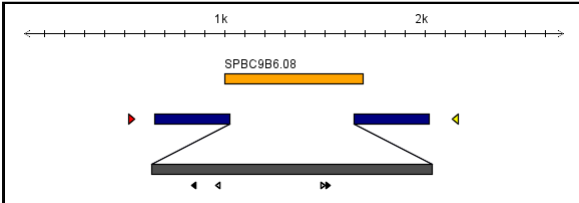

SPBC9B6.09c

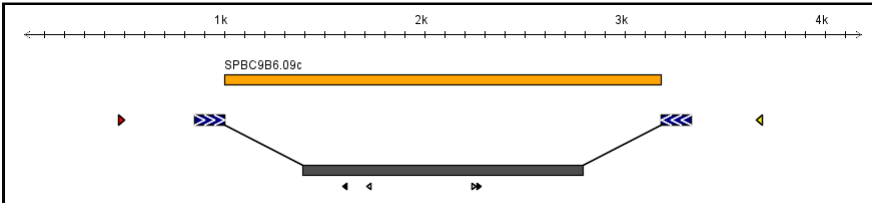

SPBC9B6.10

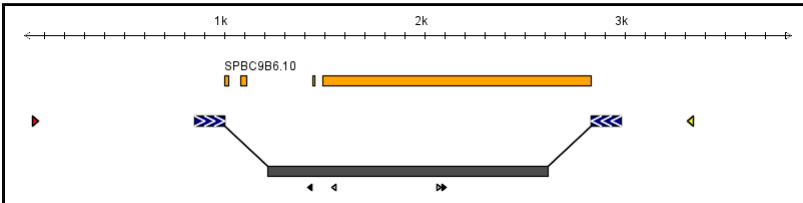

SPBC9B6.11c

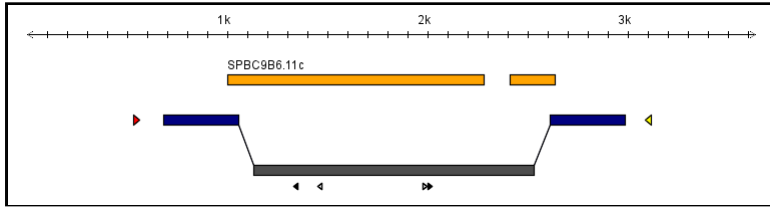

SPAC1783.05

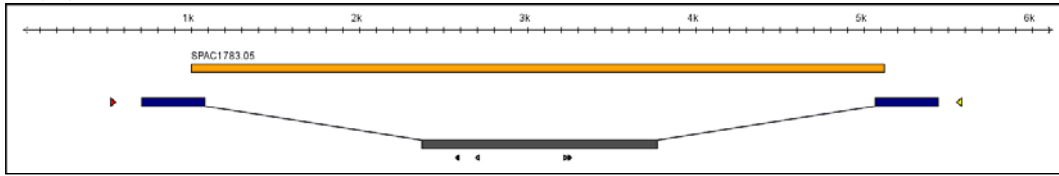

SPAC1786.03

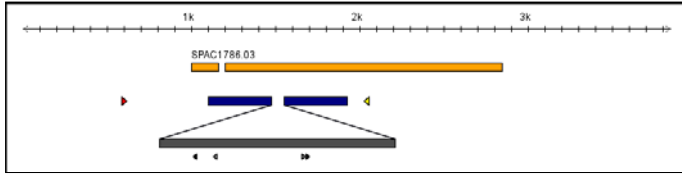

SPAC1805.17

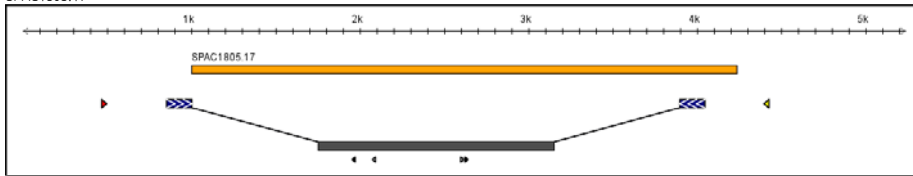

SPAC1834.02

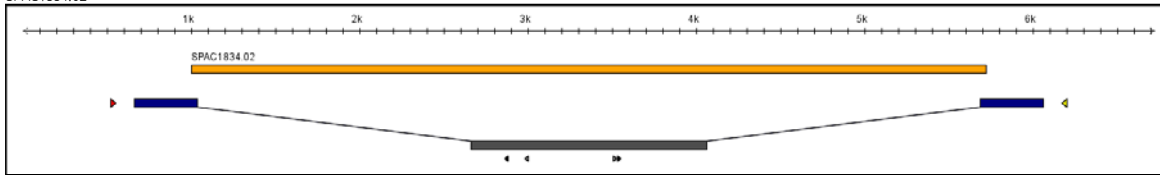

SPAC1952.13

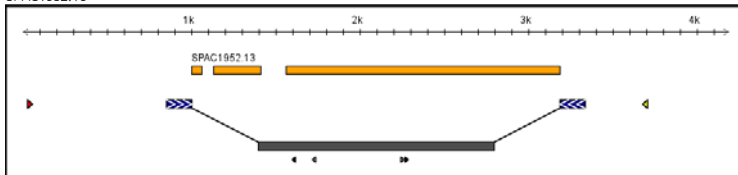

SPAC1952.16

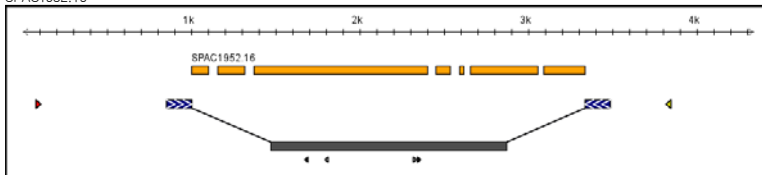

SPACUNK4.08

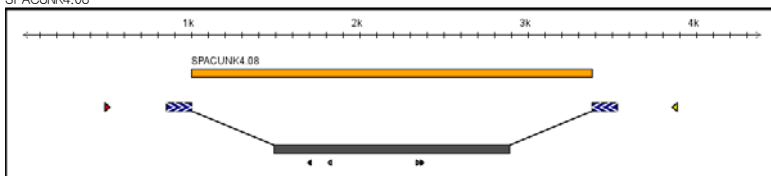

SPACUNK4.12c

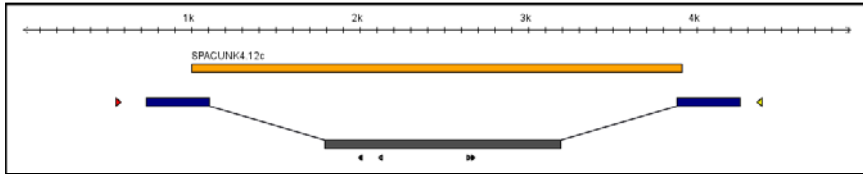

SPAP27G11.05c

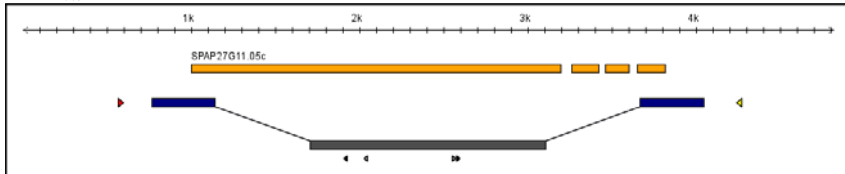

SPAP7G5.04c

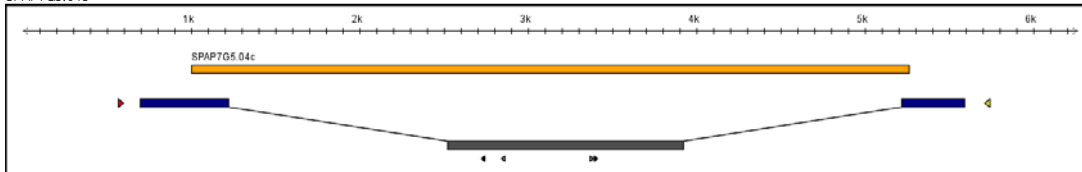

SPAP8A3.09c

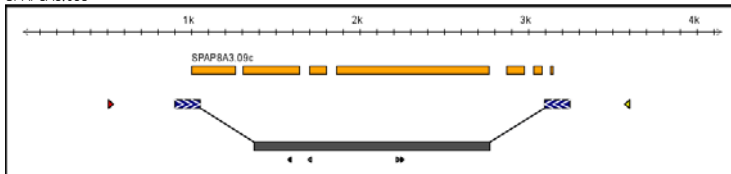

SPAP8A3.12c

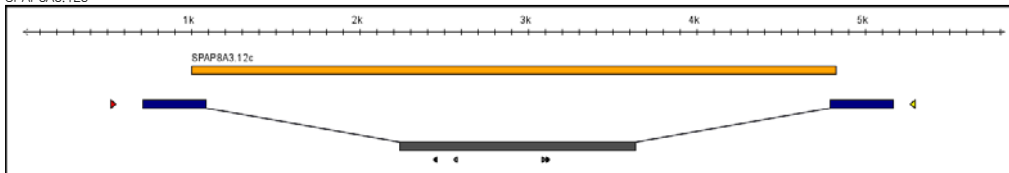

SPAPB1A10.06c

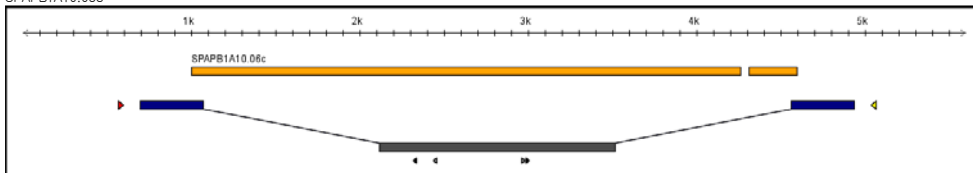

SPAPB1E7.04c

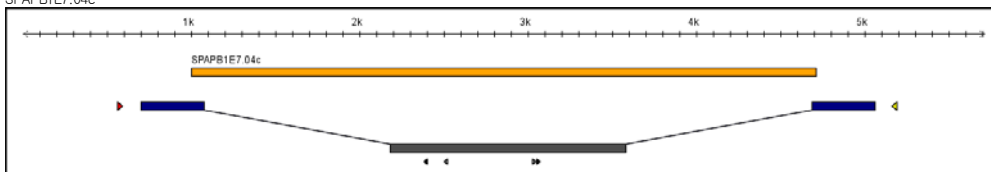

SPAPB1E7.05

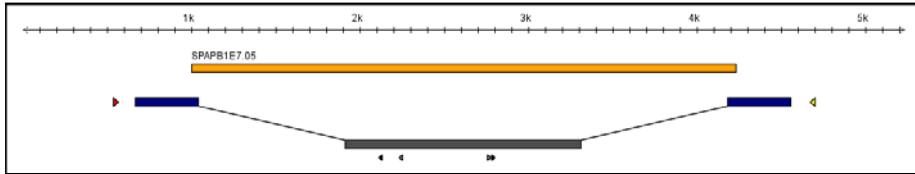

SPAPB21F2.02

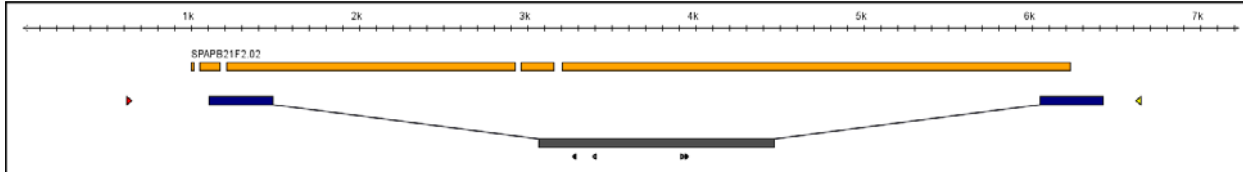

SPAPB24D3.01

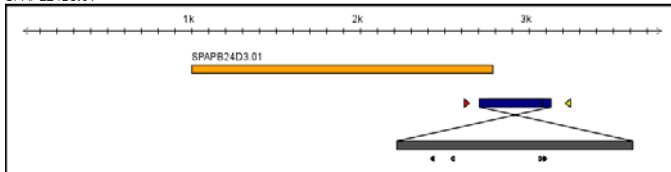

SPAPB24D3.09c

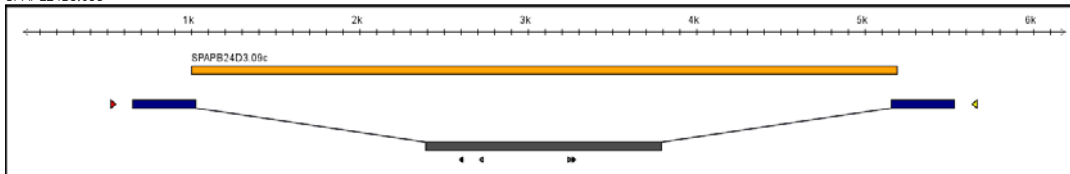

SPAPB24D3.10c

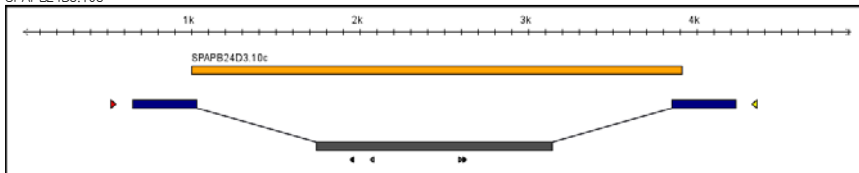

SPAPB2B4.04c

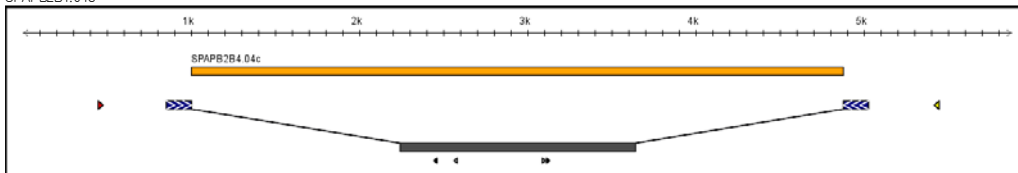

SPAPB2C8.01

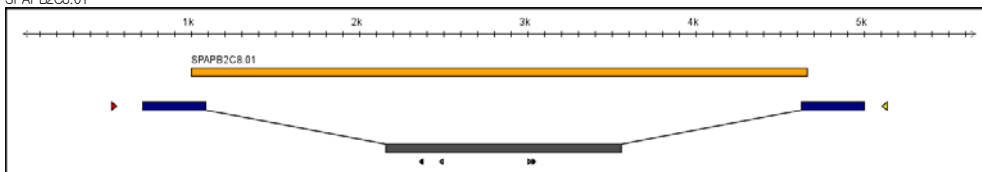

SPAPB8E5.07c



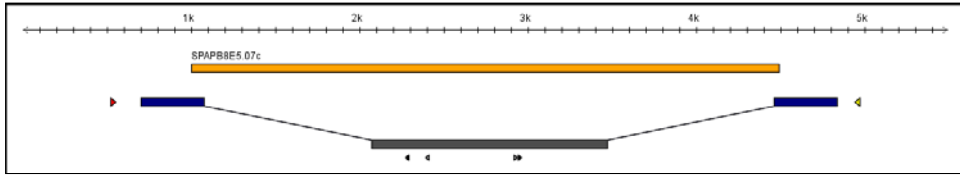

SPAPJ698.03c

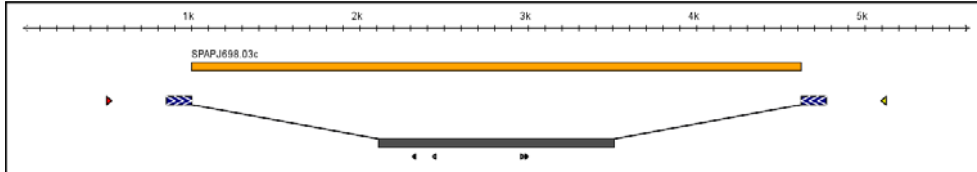

SPAPJ760.02c

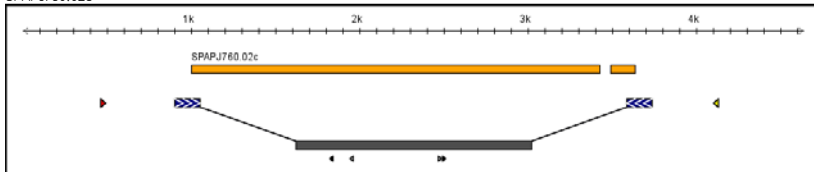

SPAPYUK71.03c

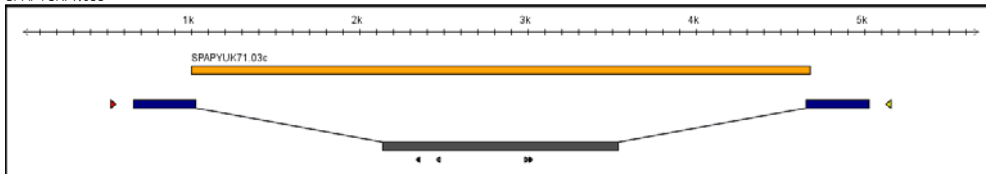

SPBC11C11.04c

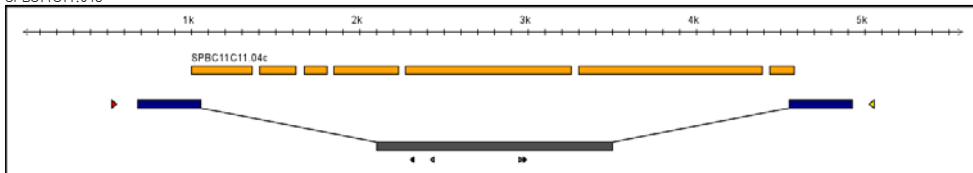

SPBC11G11.07

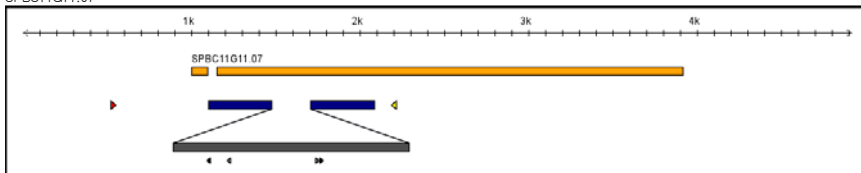

SPBC12C2.02c

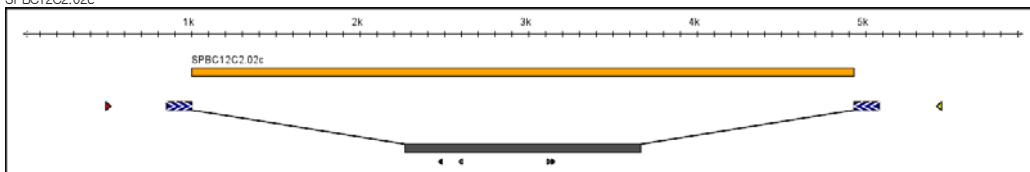

SPBC12C2.05c

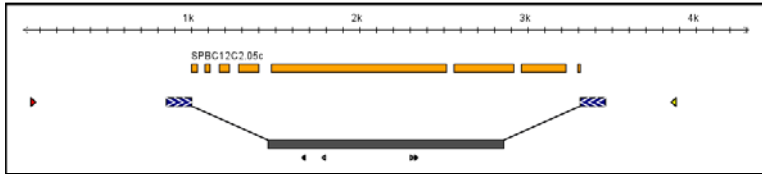

SPBC12C2.10c

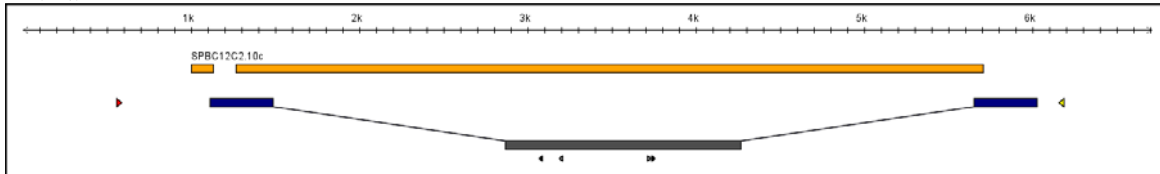

SPBC12D12.04c

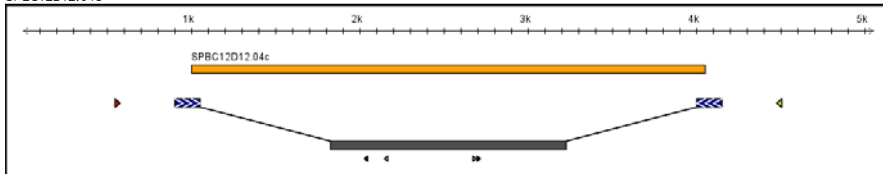

SPBC13G1.10c

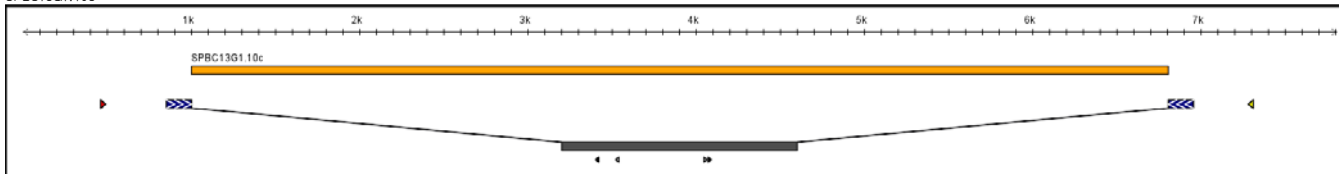

SPBC13G1.14c

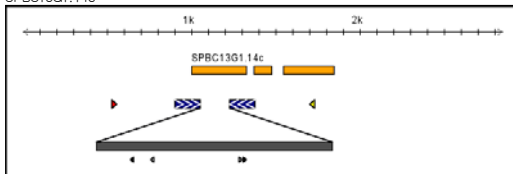

SPBC14C8.14c

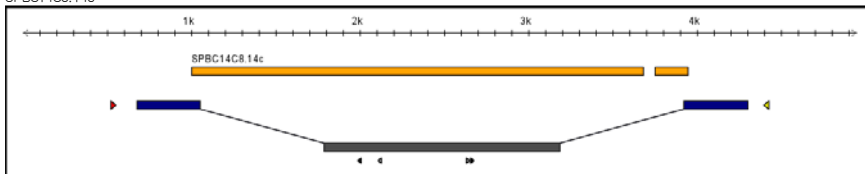

SPBC14F5.03c

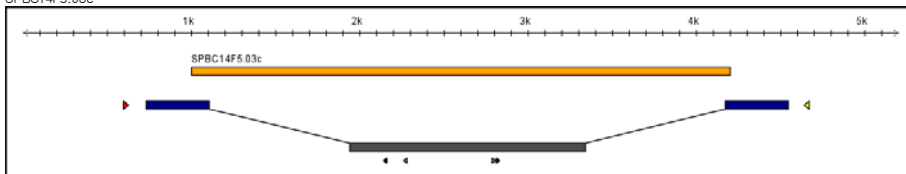

SPBC14F5.06

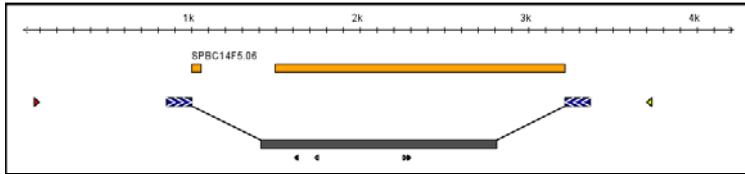

SPBC14F5.07

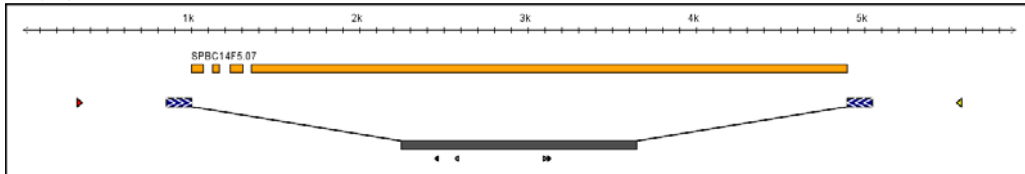

SPBC15D4.03

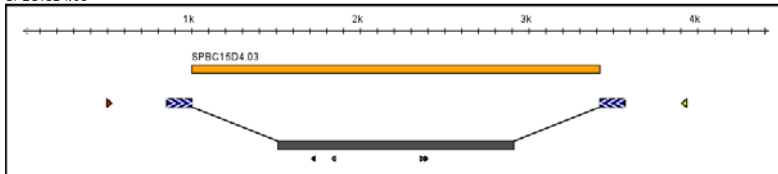

SPBC16A3.11

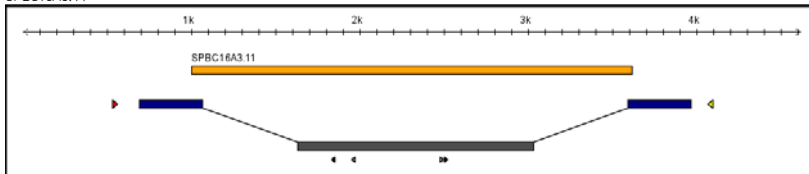

SPBC16C6.06

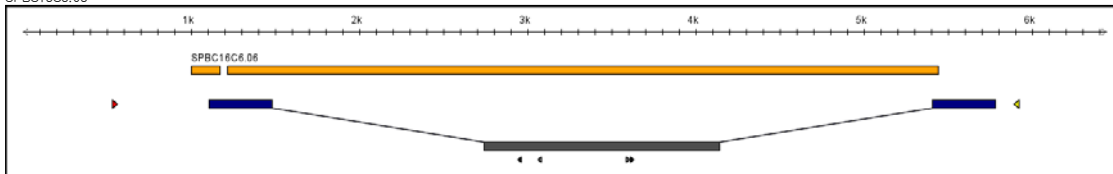

SPBC16D10.08c

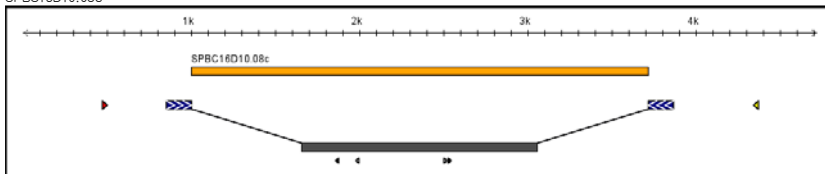

SPBC16E9.11c

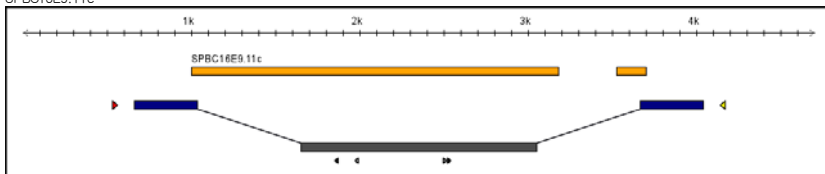

SPBC16G5.16

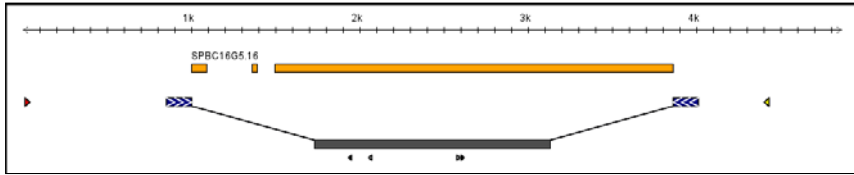

SPBC16H5.02

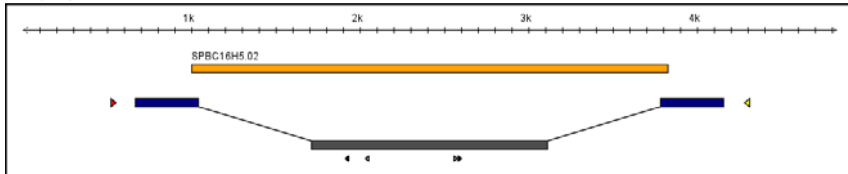

SPBC16H5.03c

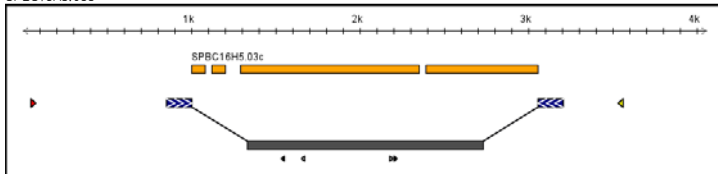

SPBC17D1.07c

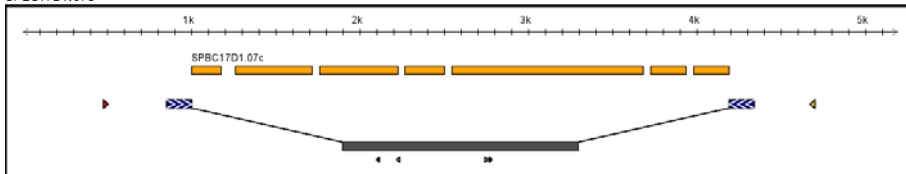

SPBC17D11.07c

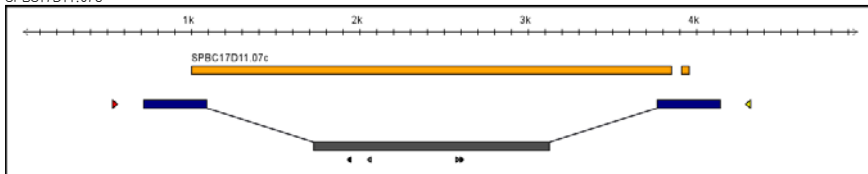

SPBC17F3.02

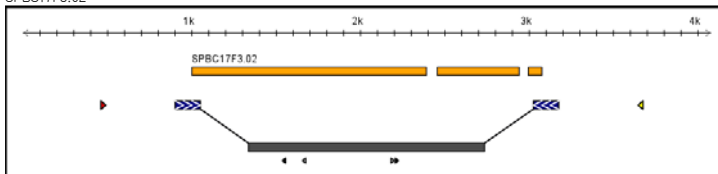

SPBC17G9.11c

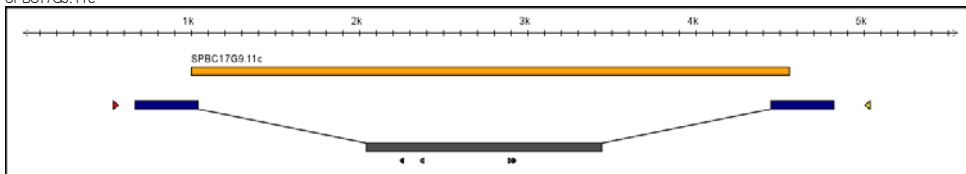

SPBC18A7.01

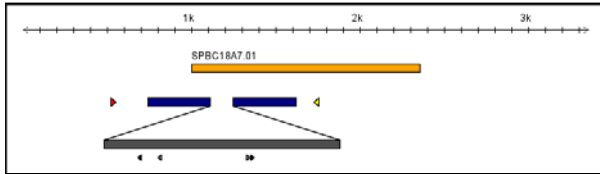

SPBC18H10.16

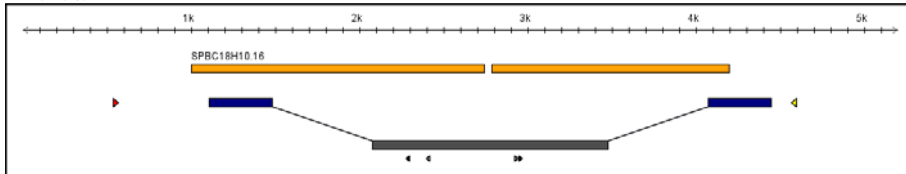

SPBC19C2.01

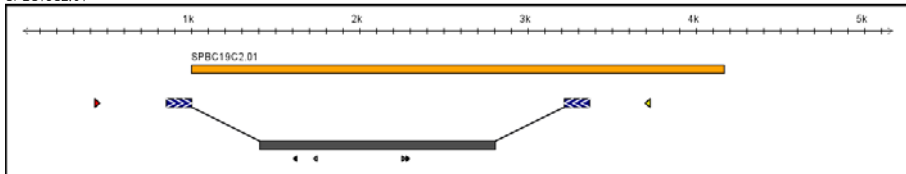

SPBC19C2.09

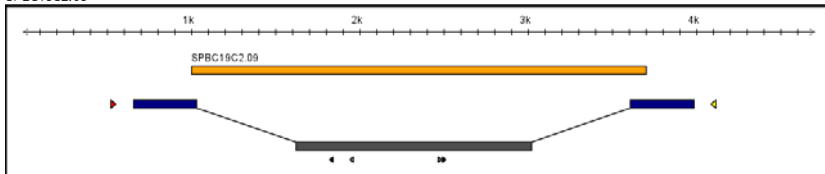

SPBC19C7.02

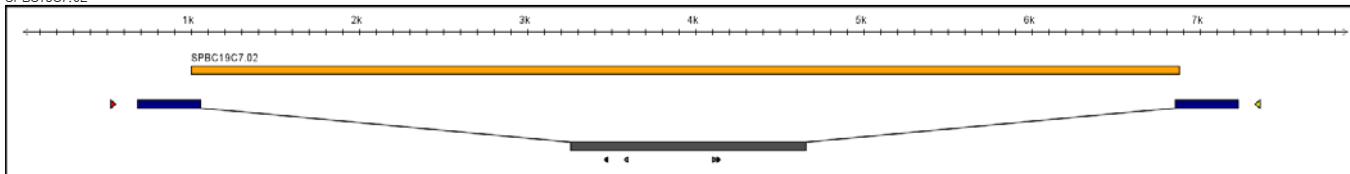

SPBC19C7.11

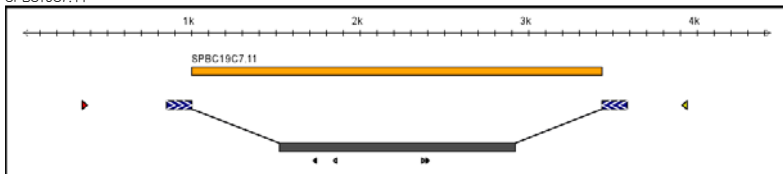

SPBC1A4.03c

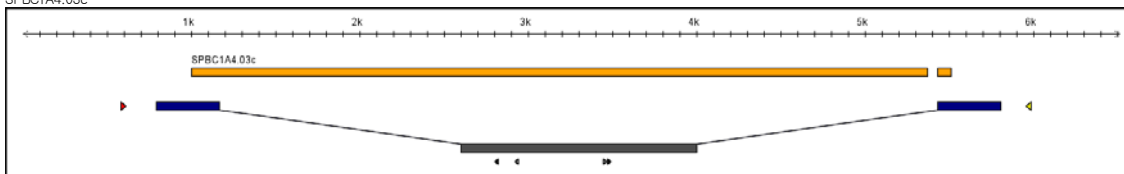

SPBC20F10.05

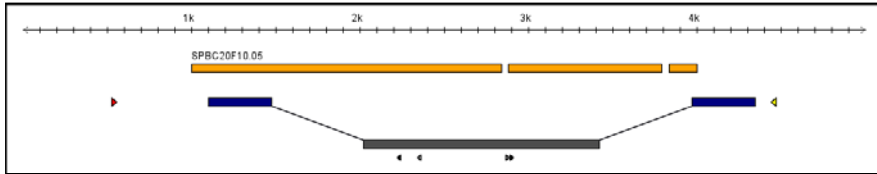

SPBC21B10.03c

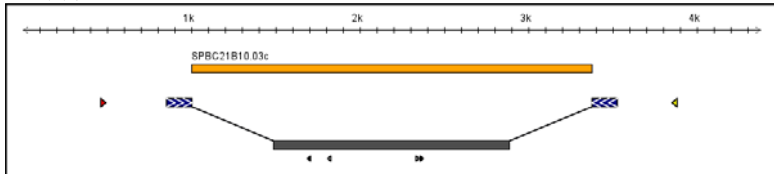

SPBC21C3.01c

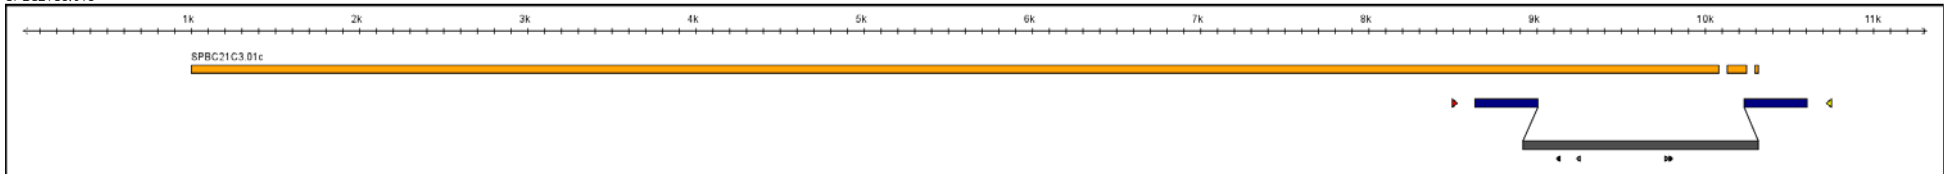

SPBC21C3.14c

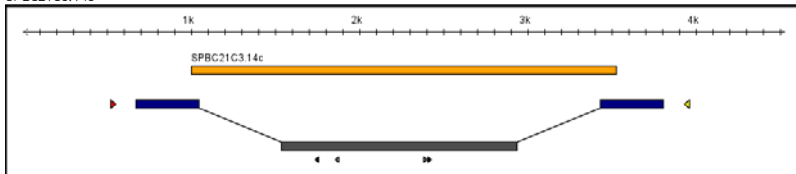

SPBC21C3.20c

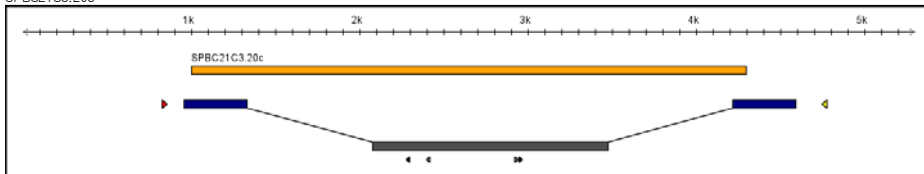

SPBC21H7.04

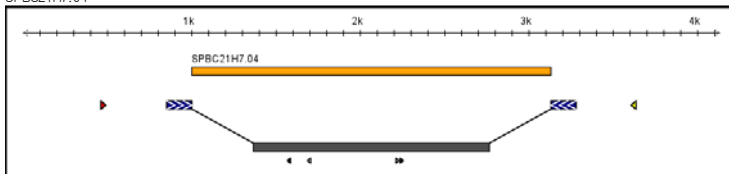

SPBC23E6.01c

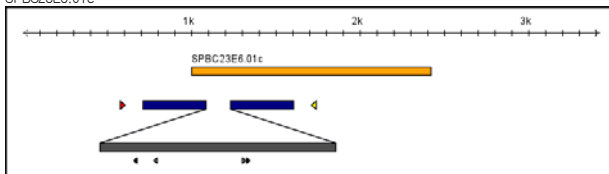

SPBC23E6.02

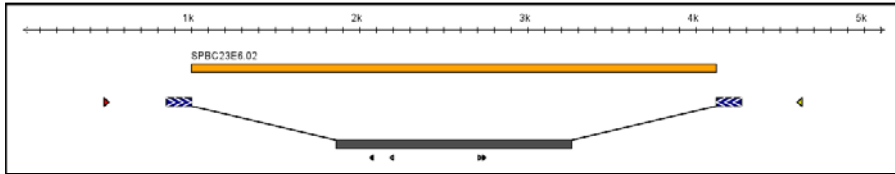

SPBC23E6.07c

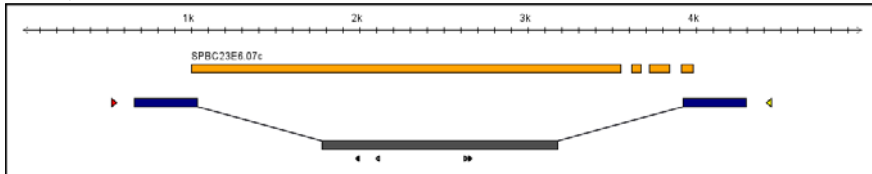

SPBC23E6.09

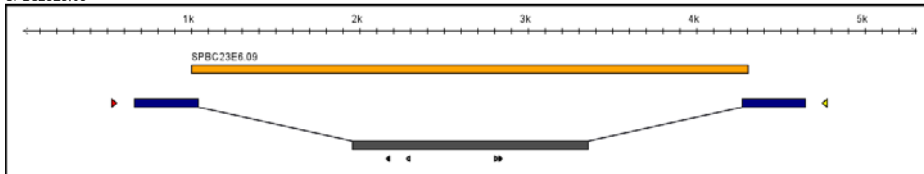

SPBC24C6.09c

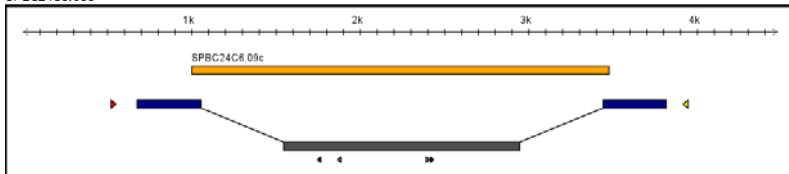

SPBC25B2.02c

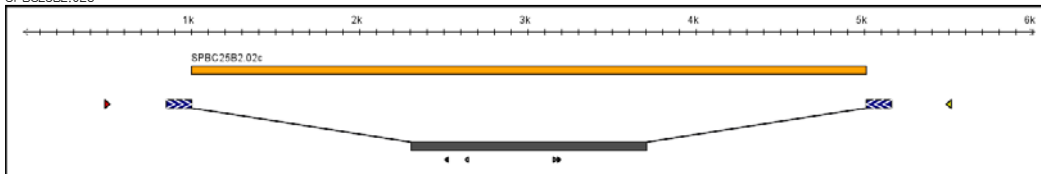

SPBC25H2.11c

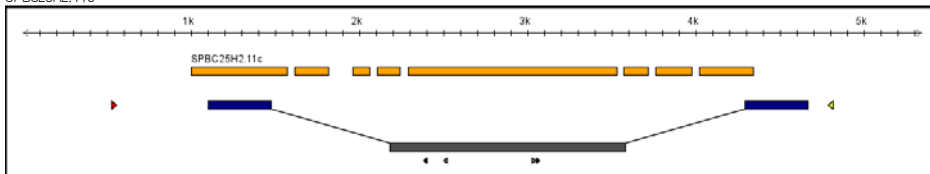

SPBC26H8.03

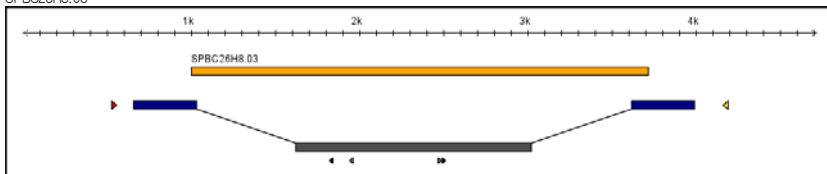

SPBC26H8.04c

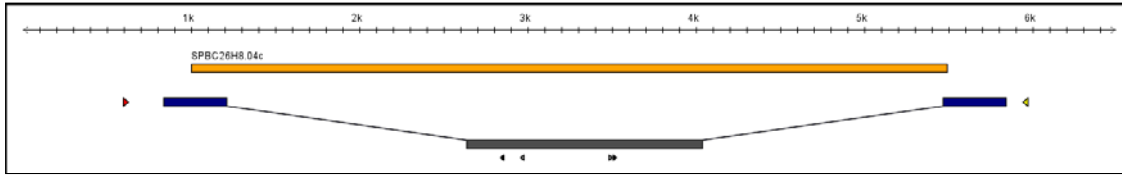

SPBC26H8.10

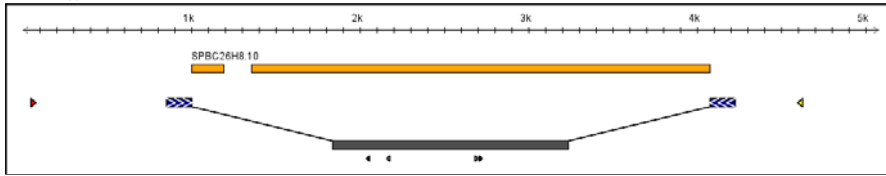

SPBC27.04

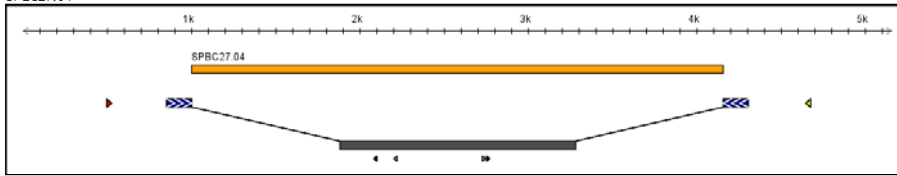

SPBC27B12.06

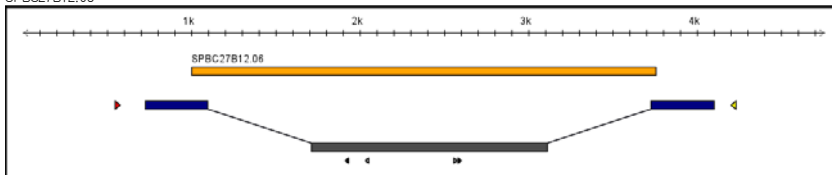

SPBC27B12.08

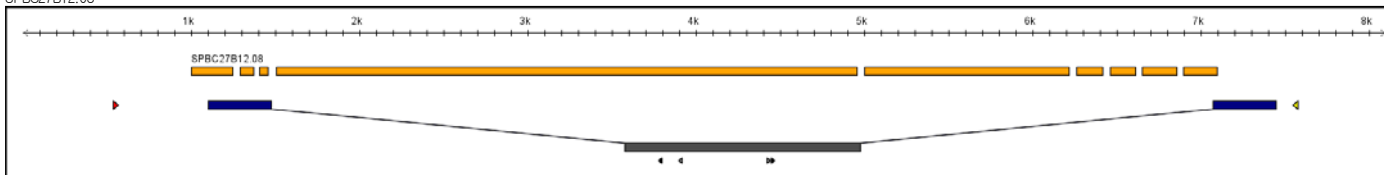

SPBC28E12.03

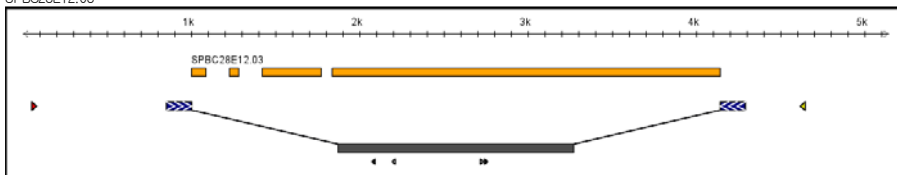

SPBC29A10.04

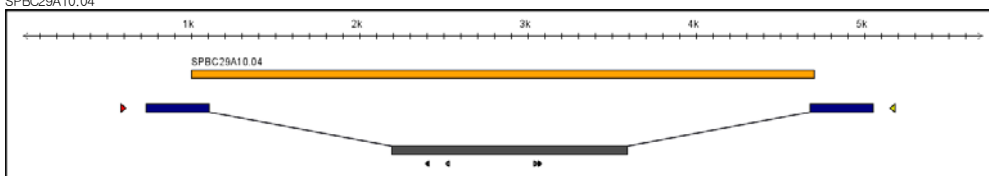

SPBC29A3.01



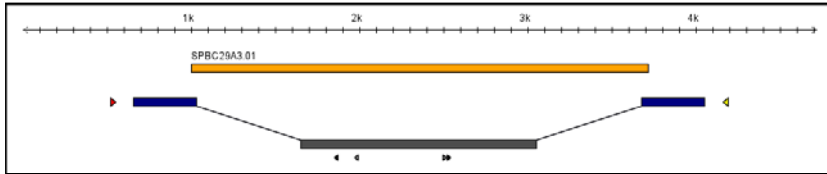

SPBC29A3.09c

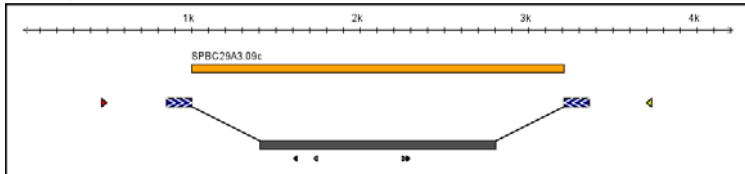

SPBC29A9.04c

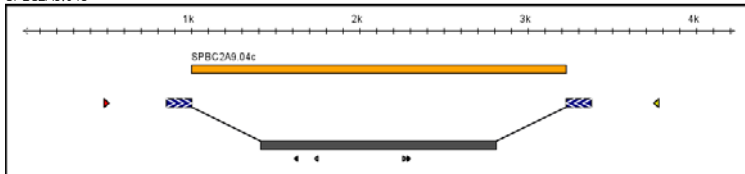

SPBC2D10.14c

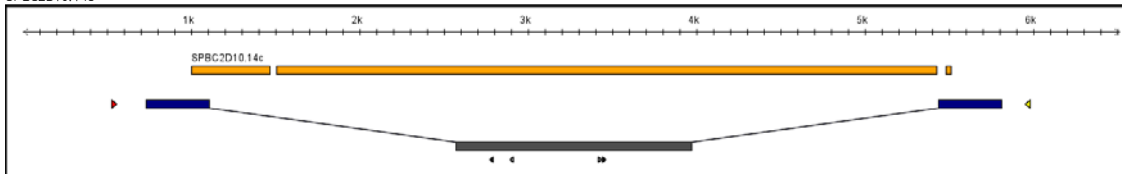

SPBC2D10.17

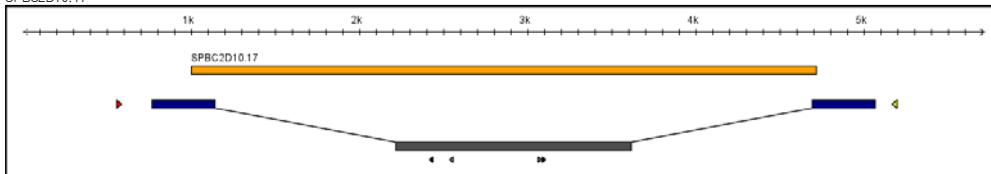

SPBC2F12.03c

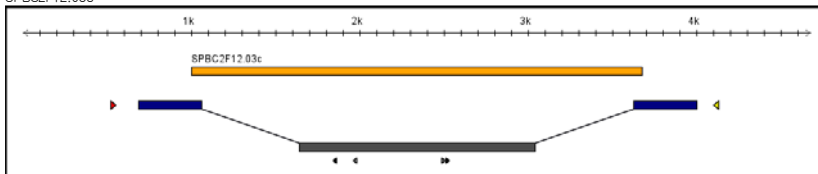

SPBC2F12.05c

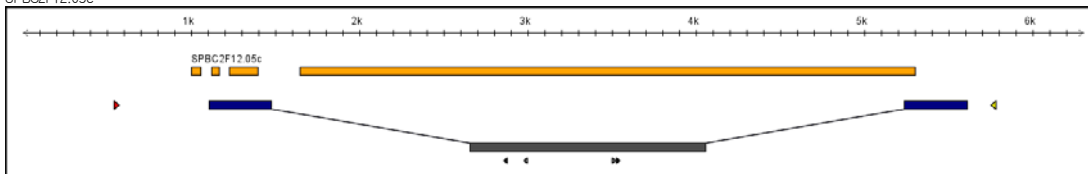

SPBC2G2.02

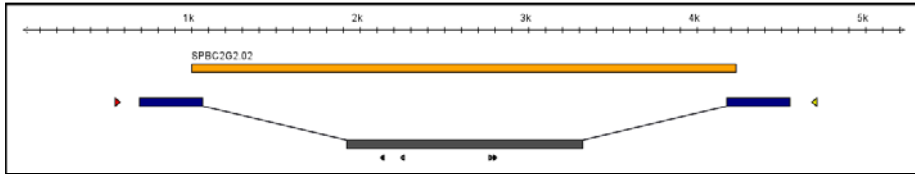

SPBC3B8.04c

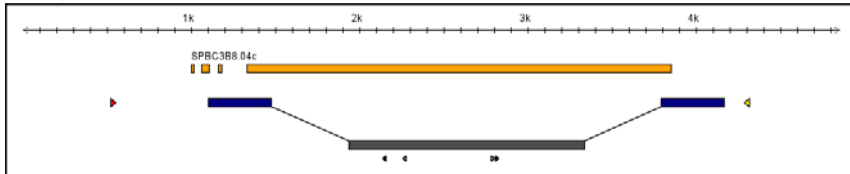

SPBC3B9.15c

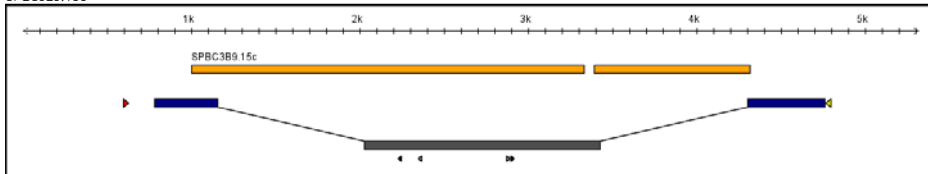

SPBC3B9.16c

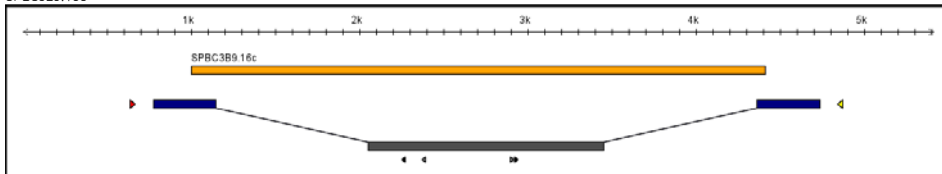

SPBC3D6.12

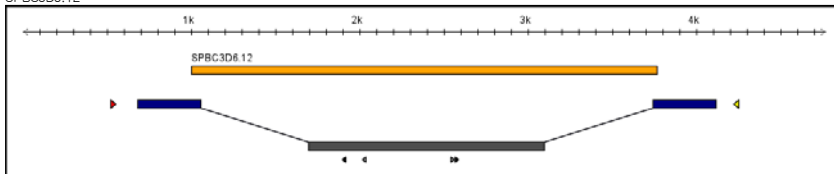

SPBC3E7.08c

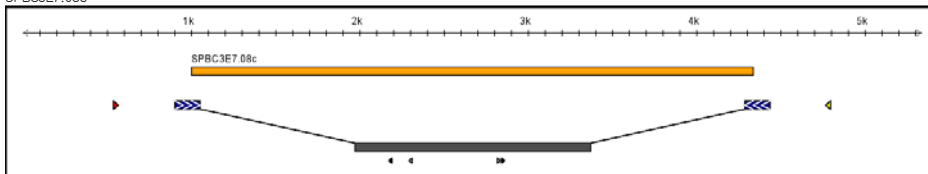

SPBC3F6.04c

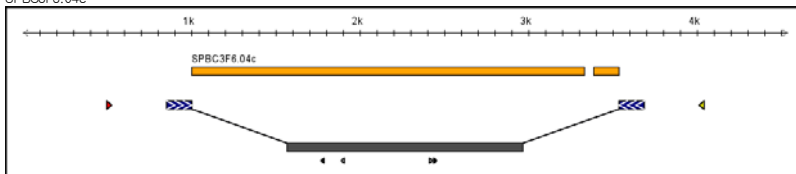

SPBC3F6.05

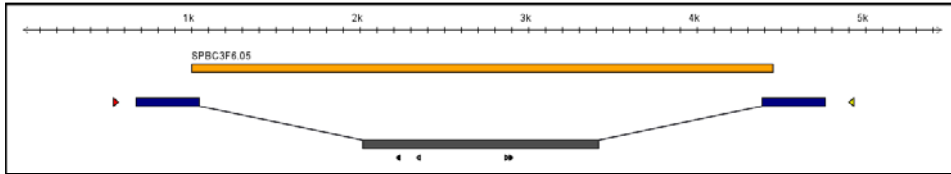

SPBC3H7.02

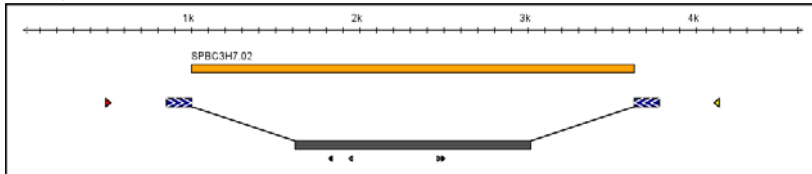

SPBC3H7.03c

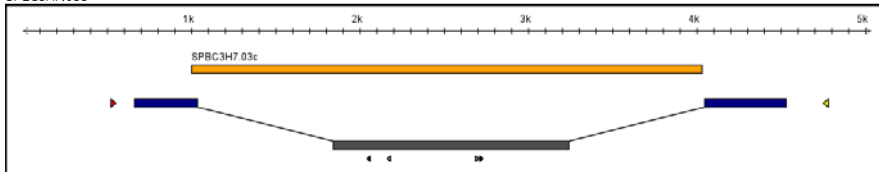

SPBC4.03c

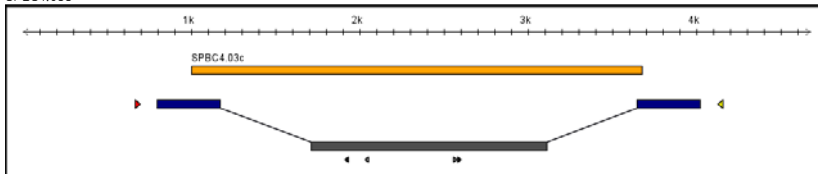

SPBC4.04c

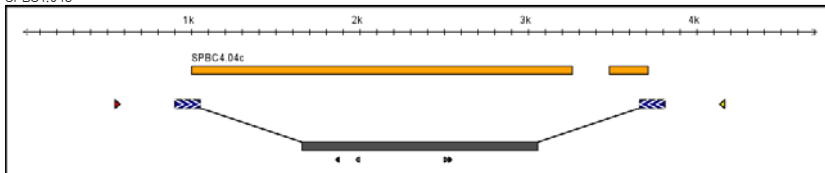

SPBC4F6.06

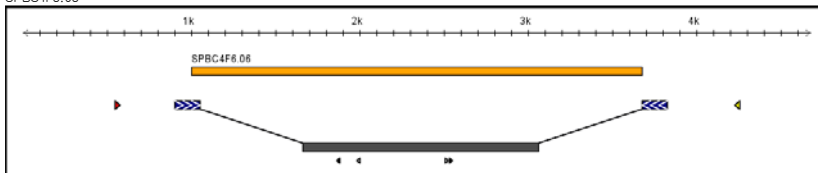

SPBC4F6.13c

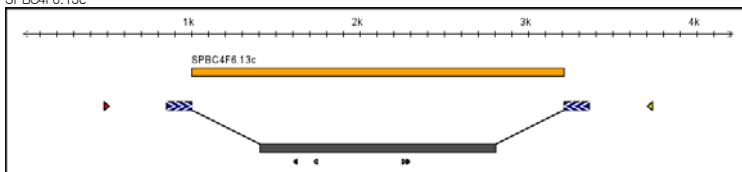

SPBC4F6.17c

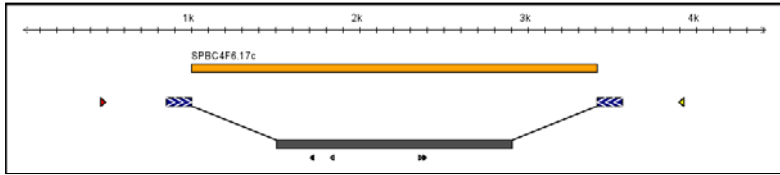

SPBC6B1.02

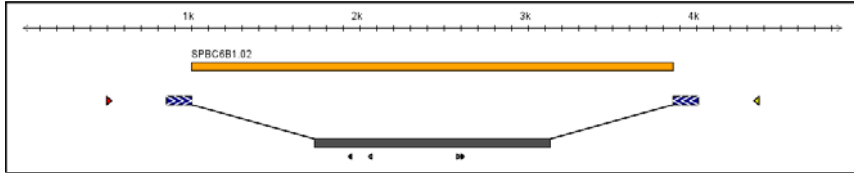

SPBC6B1.07

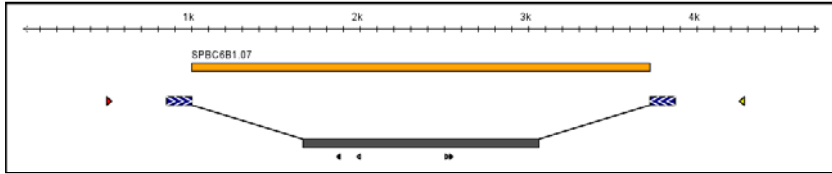

SPBC8D2.06

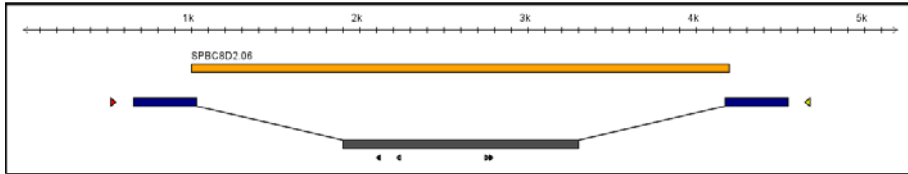

SPAC1834.08

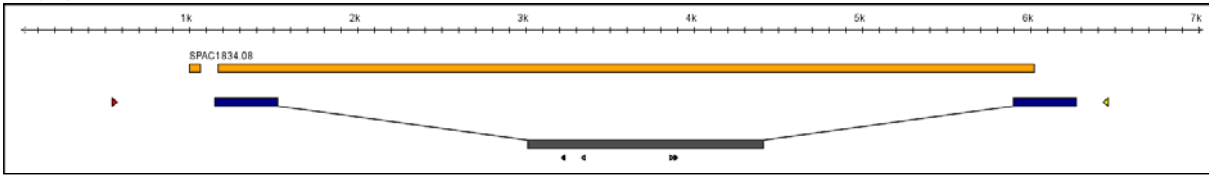

SPAP27G11.10c

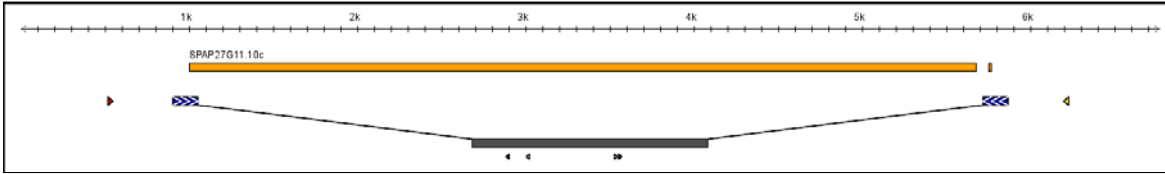

SPAPB1E7.07

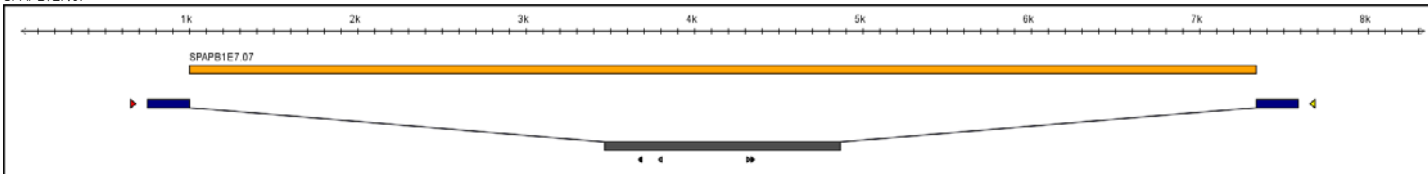

SPBC15C4.05

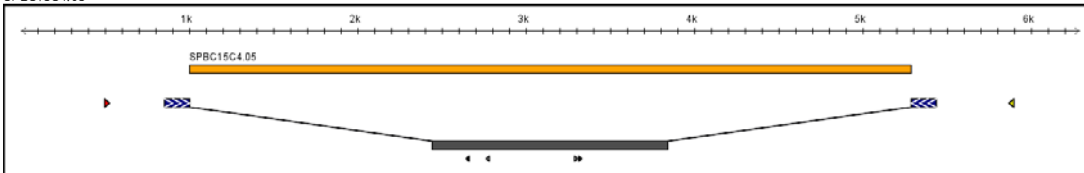

SPBC16C6.02c

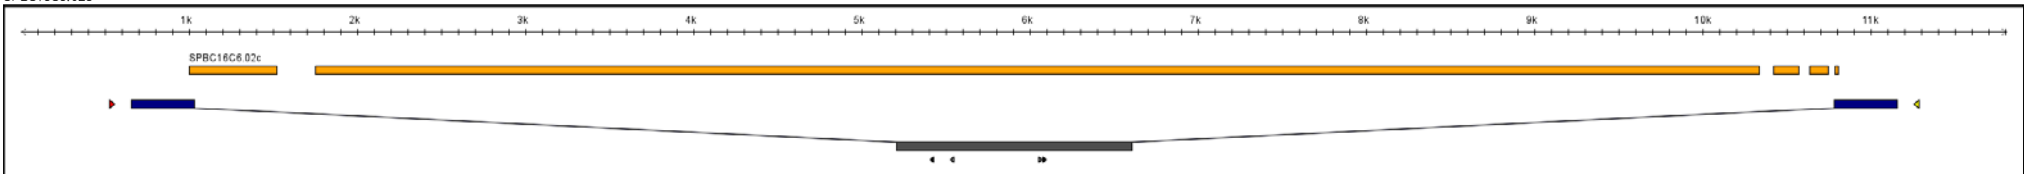

SPBC16D10.04c

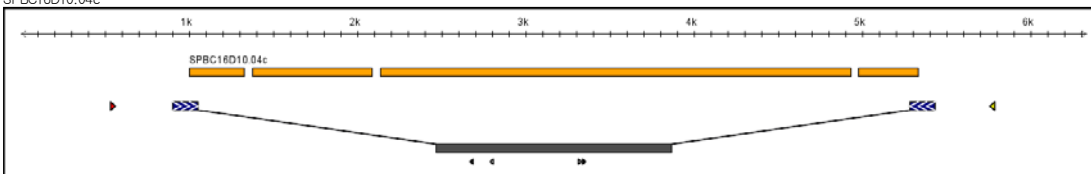

SPBC16D10.05

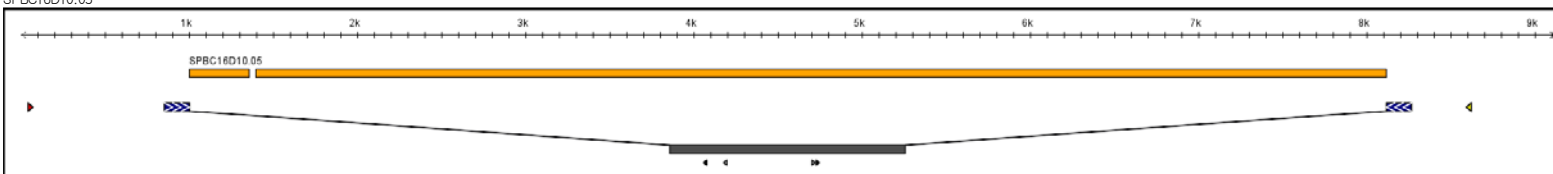

SPBC19C7.03

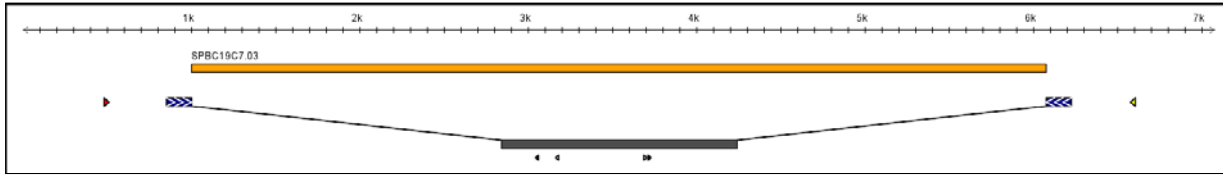

SPBC19G7.05c

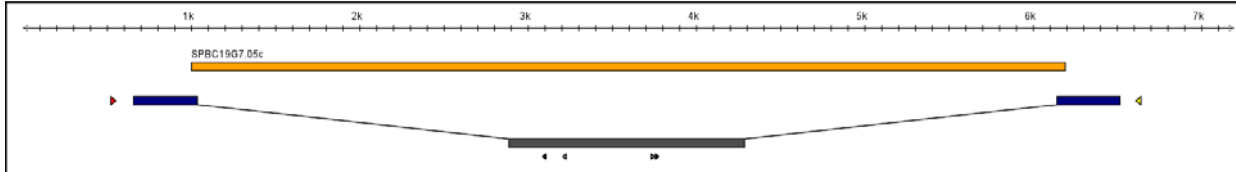

SPBC21D10.09c

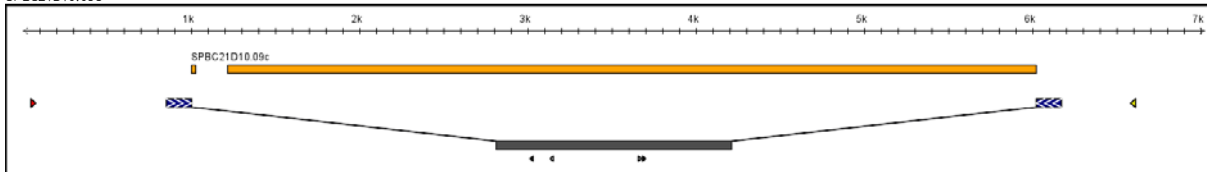

SPBC23E6.04c

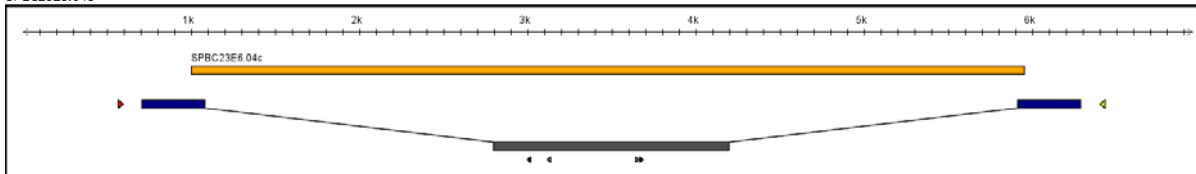

SPBC25H2.13c

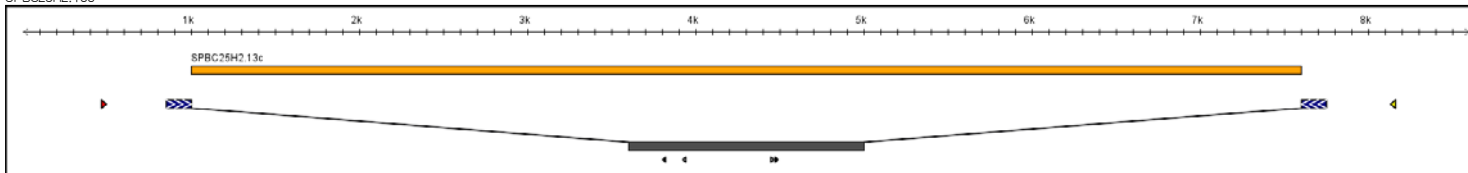

SPBC28E12.06c

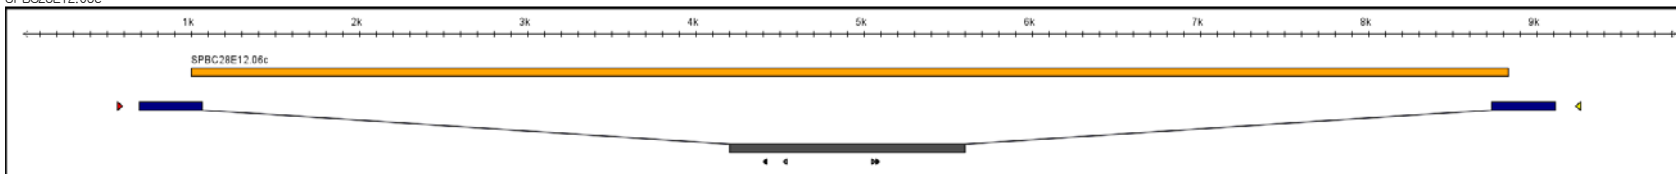

SPBC28F2.12

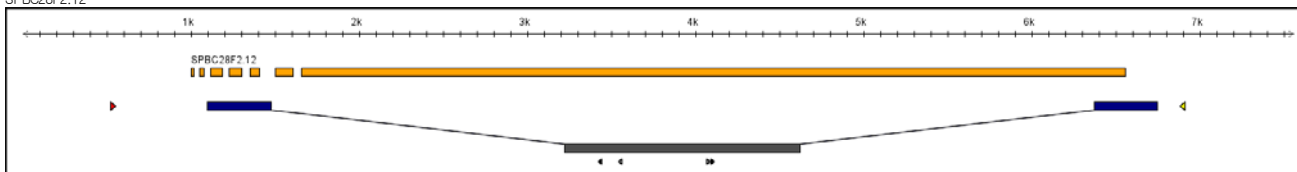

SPBC4C3.05c

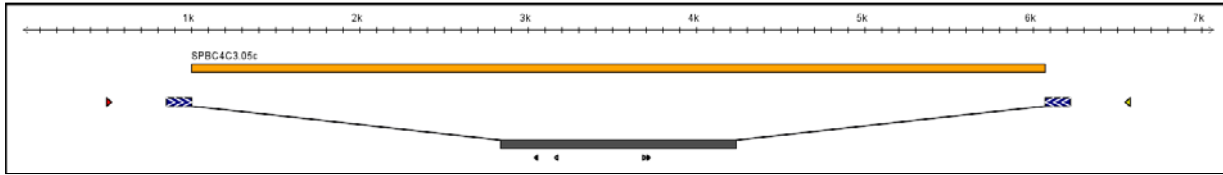

SPBC106.01

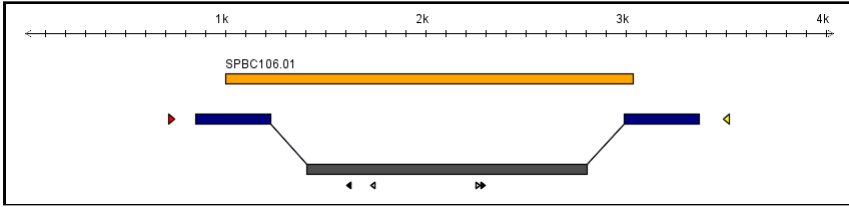

SPBC106.03

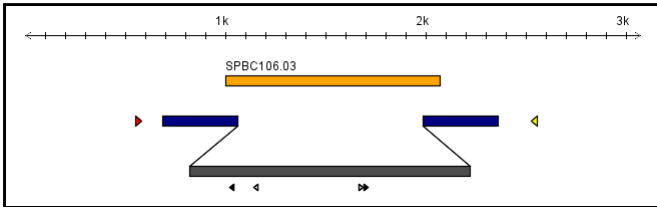

SPBC106.04

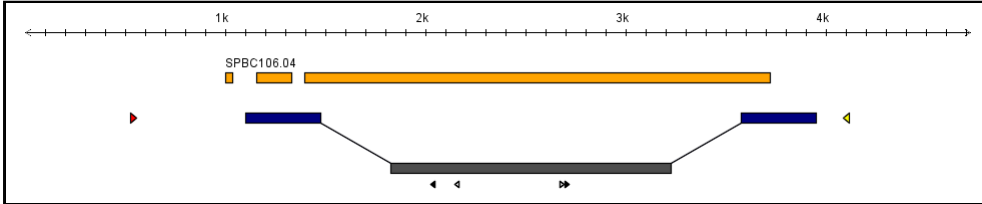

SPBC106.06

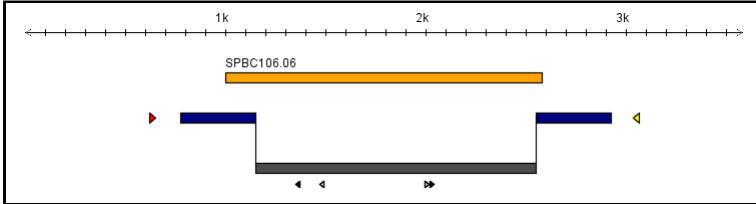

SPBC106.07c

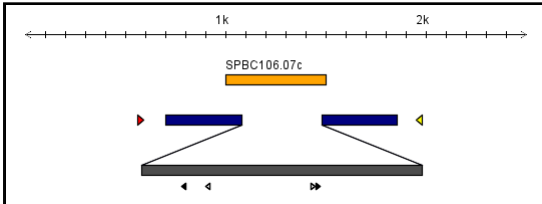

SPBC106.08c

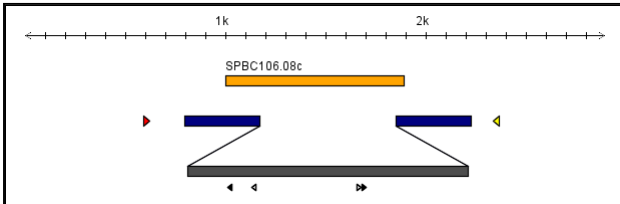

SPBC106.10

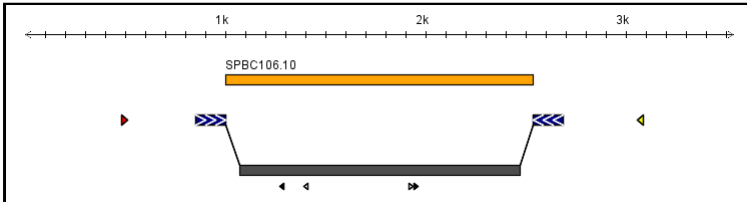

SPBC106.11c

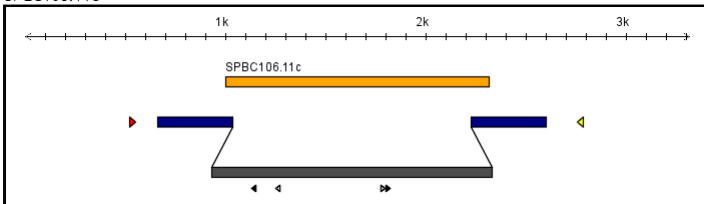

SPBC106.12c

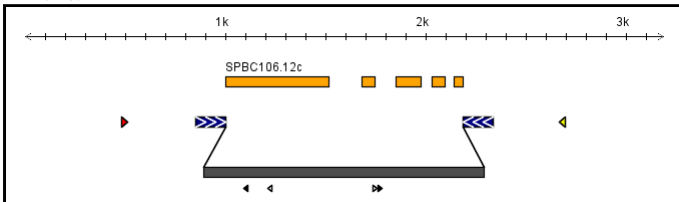



SPBC106.13

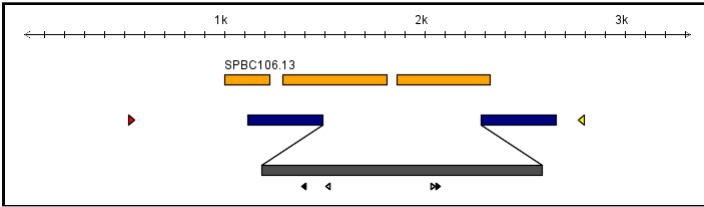

SPBC106.15

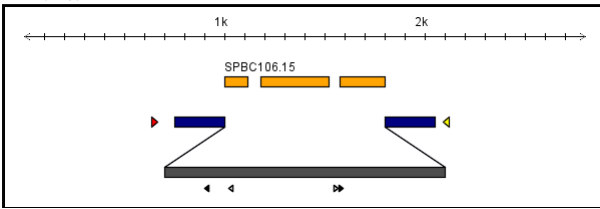

SPBC106.16

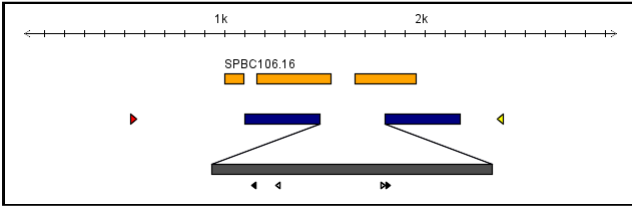

SPBC106.17c

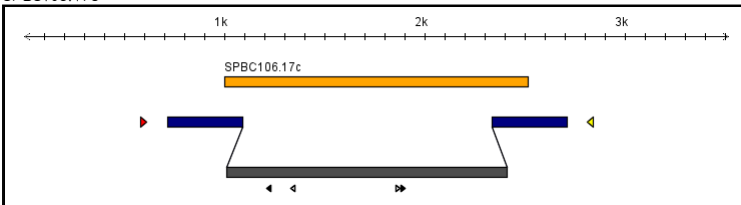

SPBC106.18

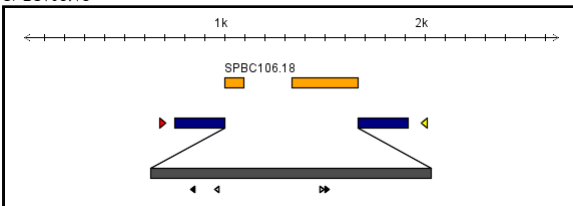

SPBC106.19

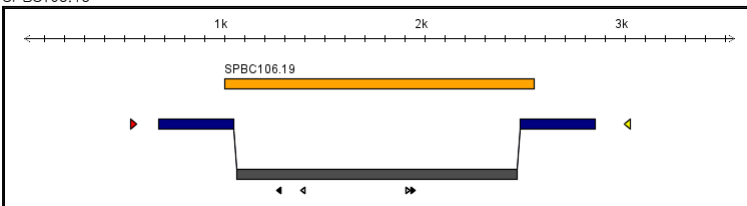

SPBC106.20

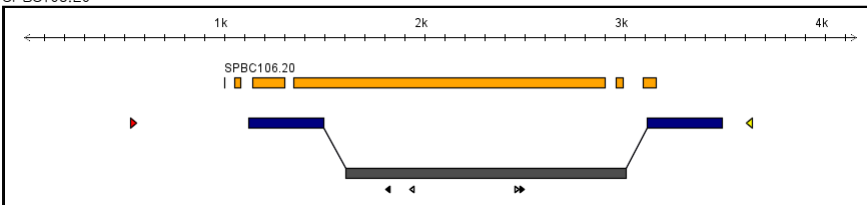

SPBC1105.01

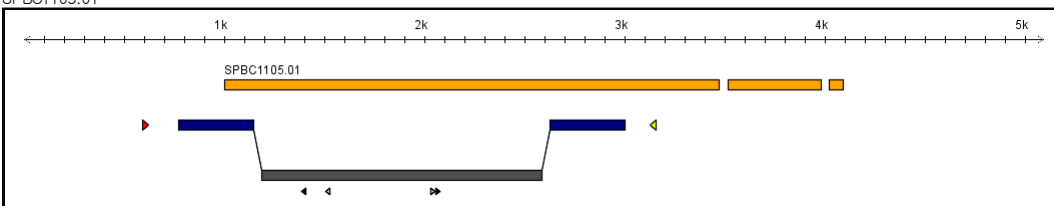

SPBC1105.02c

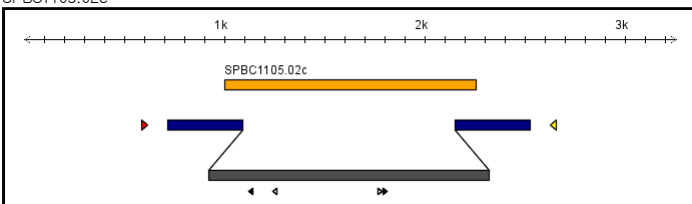

SPBC1105.04c

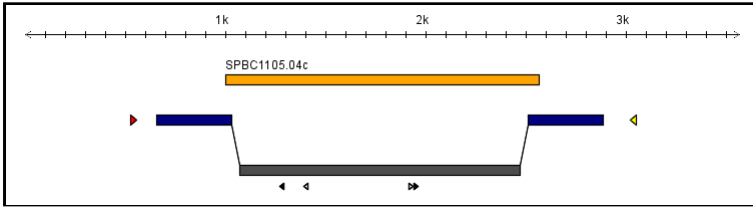

SPBC1105.05

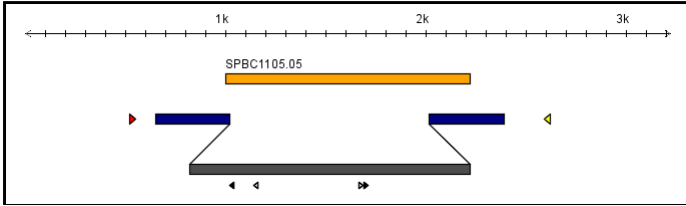

SPBC1105.06

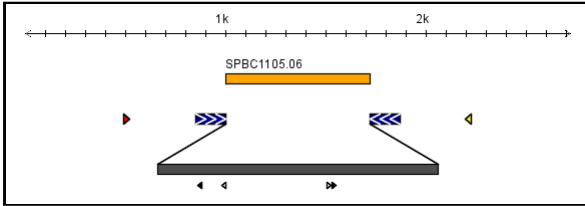

SPBC1105.07c

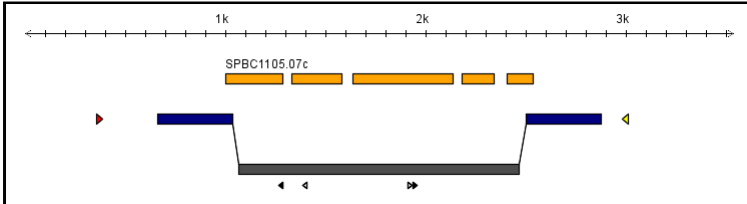

SPBC1105.09

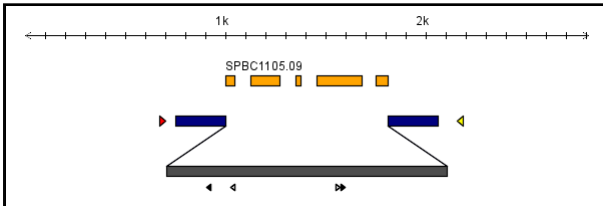

SPBC1105.11c

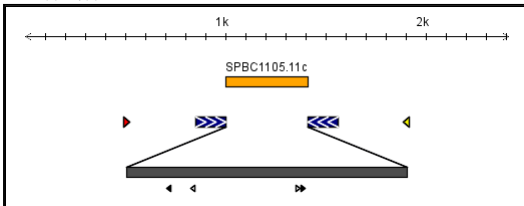

SPBC1105.12

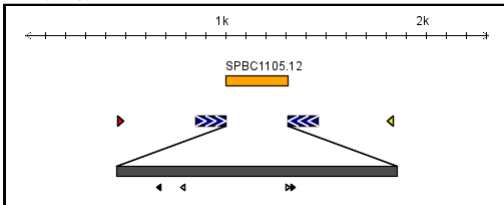

SPBC1105.13c

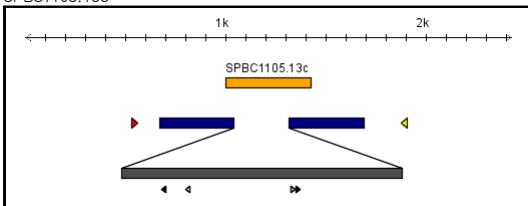

SPBC1105.14

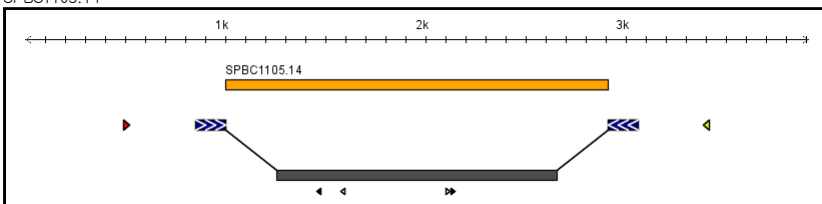

SPBC1105.15c

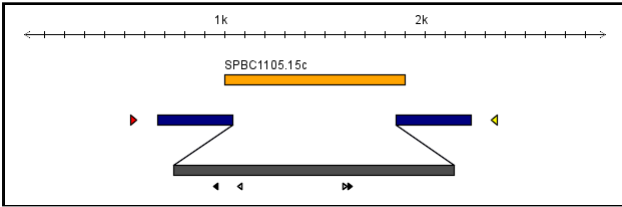

SPBC1105.16c

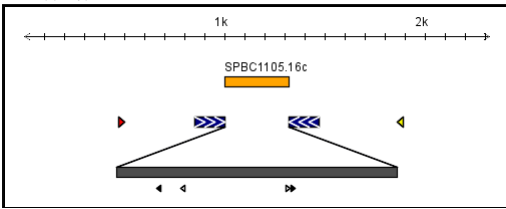

SPBC1105.17

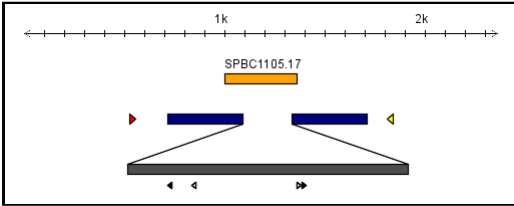

SPBC1105.18c

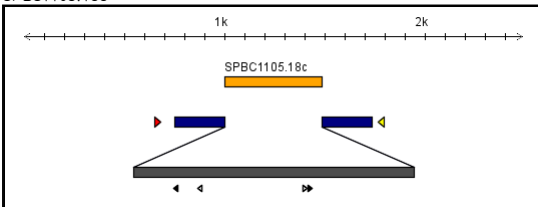

SPBC115.01c

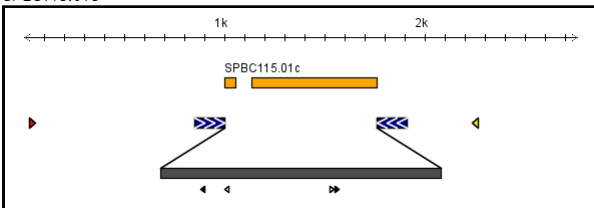

SPBC115.02c

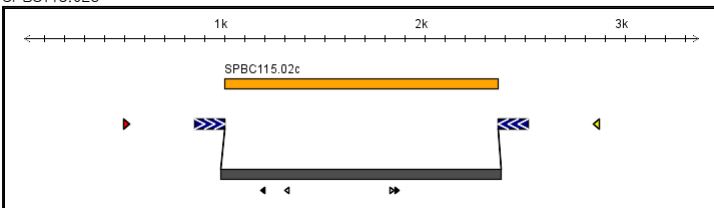

SPBC115.03

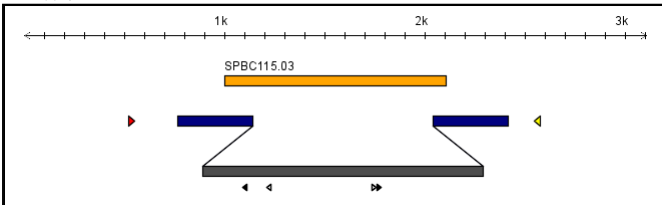

SPBC119.01

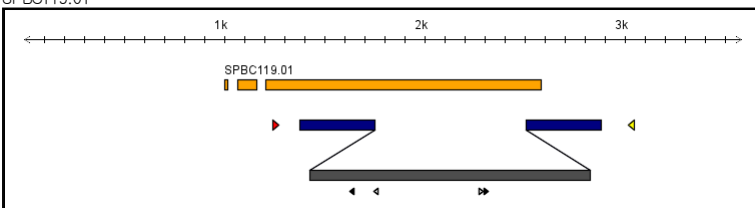

SPBC119.02

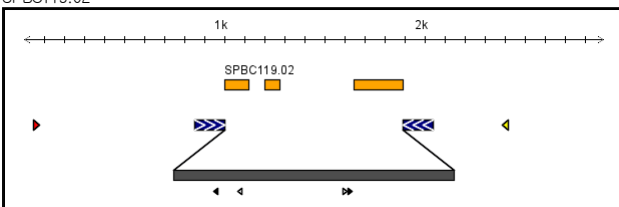

SPBC119.03

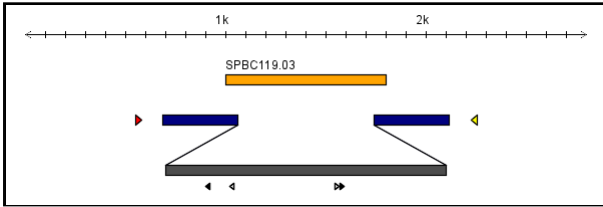

SPBC119.04

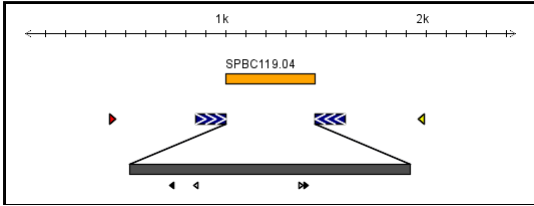

SPBC119.05c

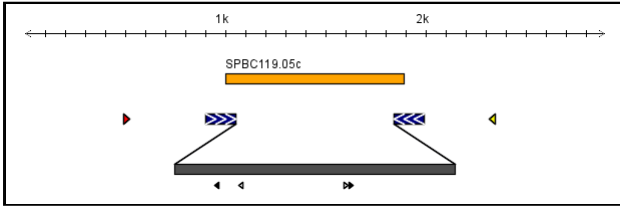

SPBC119.06

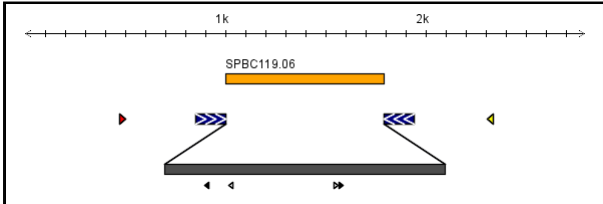

SPBC119.08

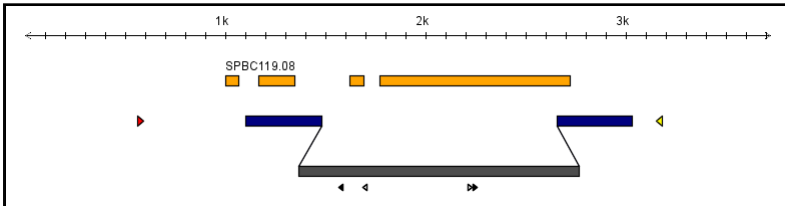

SPBC119.09c

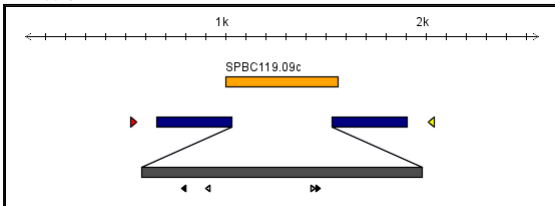

SPBC119.11c

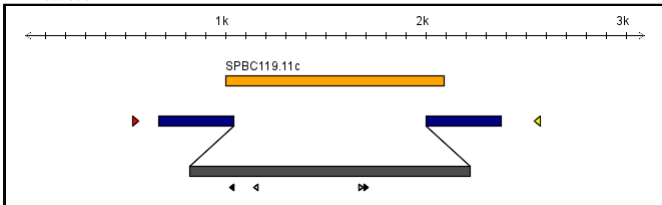

SPBC119.12

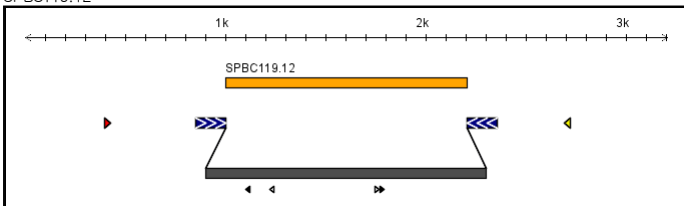

SPBC119.13c

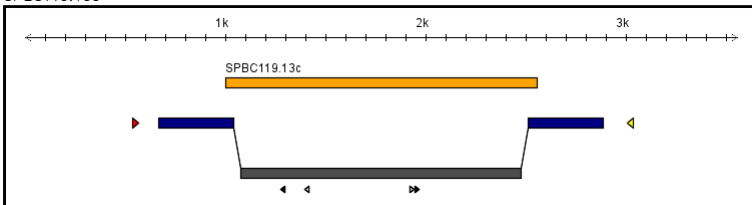

SPBC119.14

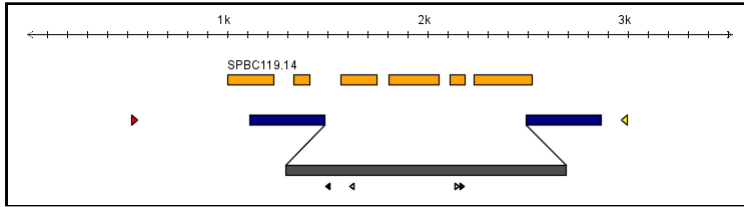

SPBC119.15

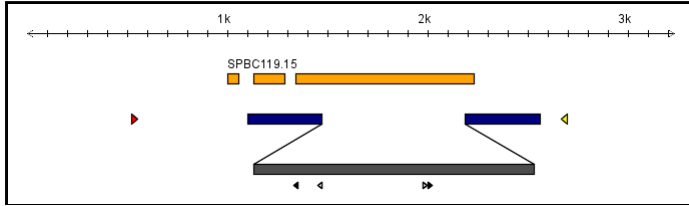

SPBC119.16c

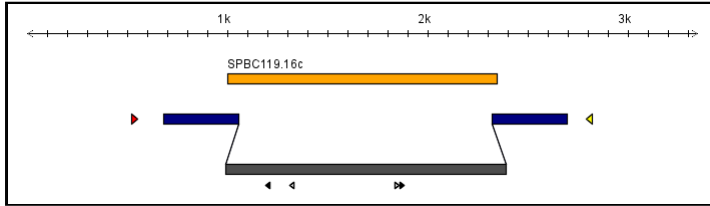

SPBC119.17

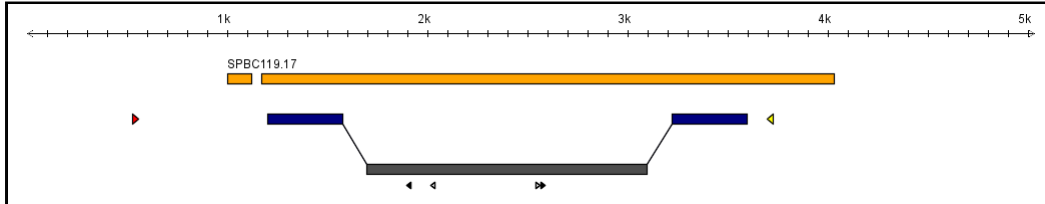

SPBC119.18

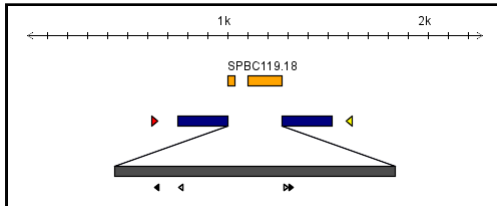

SPBC1198.01

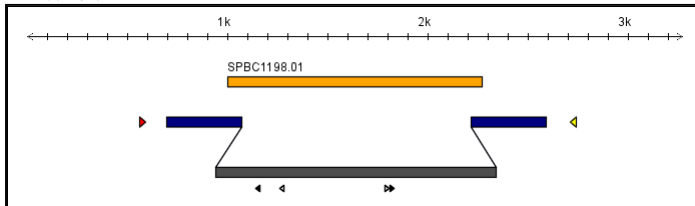

SPBC1198.02

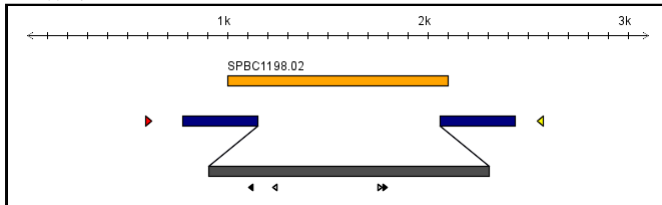

SPBC1198.03c

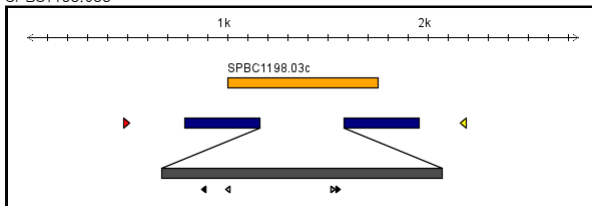

SPBC1198.04c

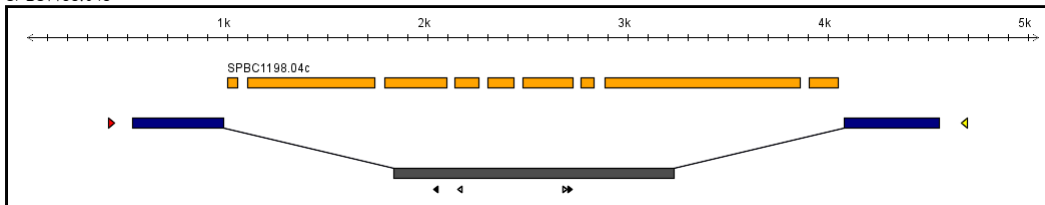

SPBC1198.05

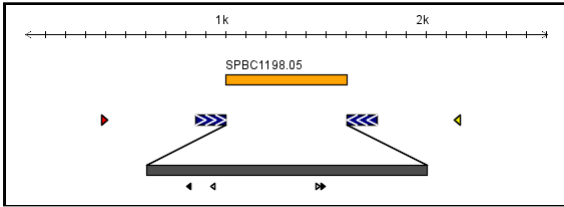

SPBC1198.06c

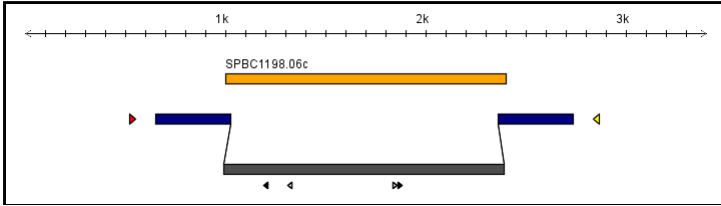

SPBC1198.07c

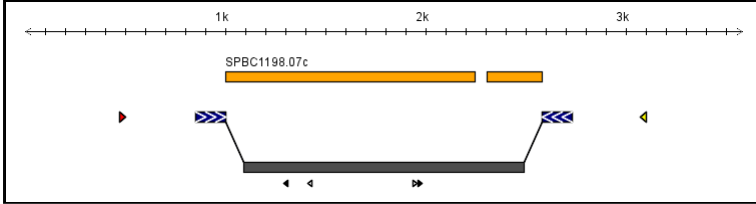

SPBC1198.08

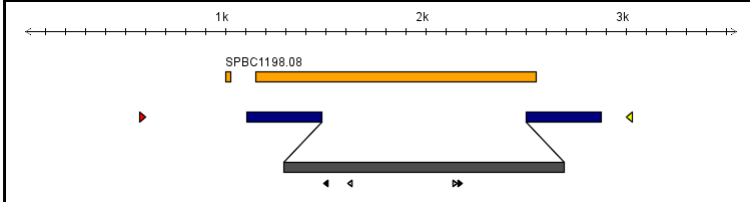

SPBC1198.09

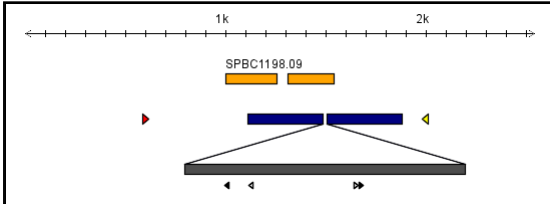

SPBC1198.10c

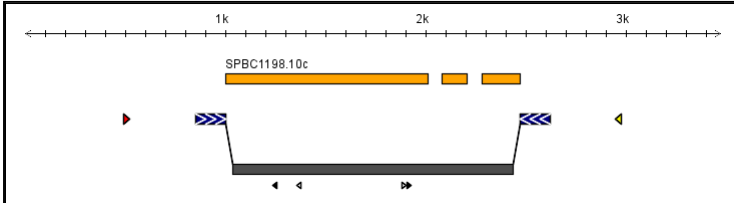

SPBC1198.11c

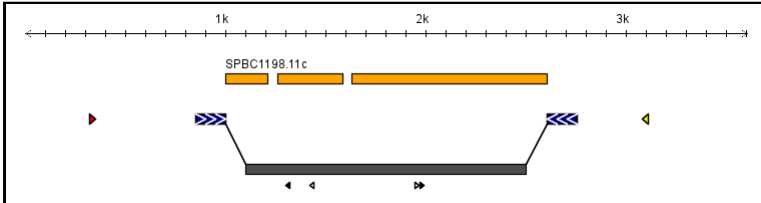

SPBC1198.12

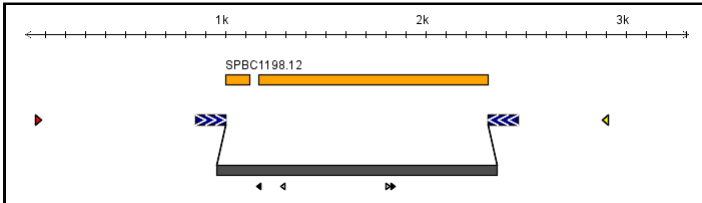

SPBC1198.13c

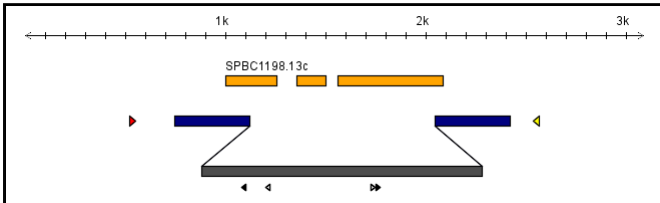

SPBC1198.14c

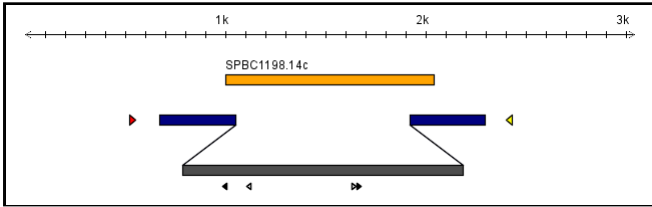

SPBC1215.01

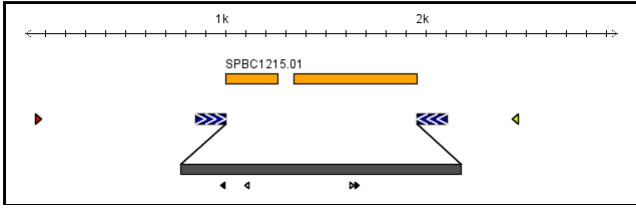

SPBC1271.01c

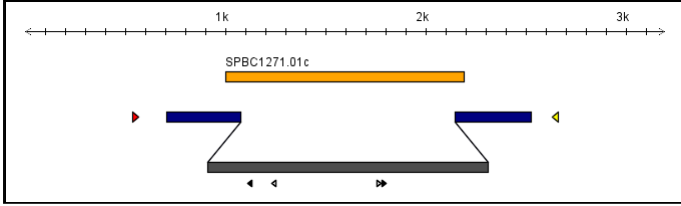

SPBC1271.03c

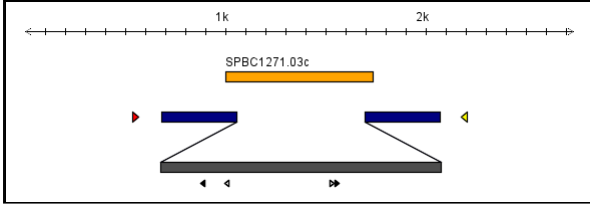

SPBC1271.04c

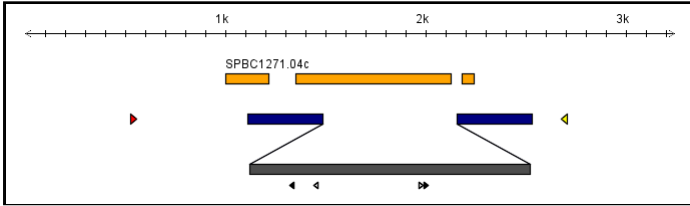

SPBC1271.05c

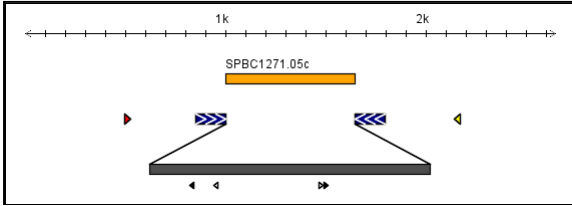

SPBC1271.06c

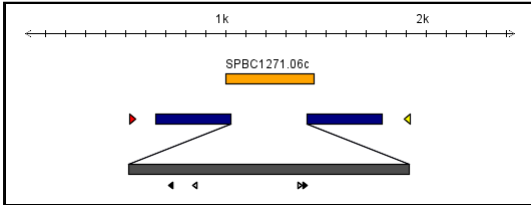

SPBC1271.07c

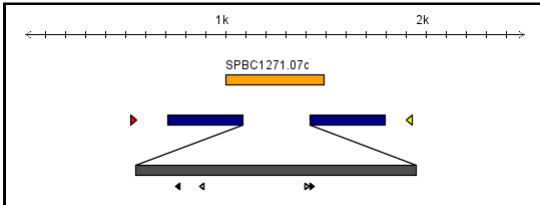

SPBC1271.08c

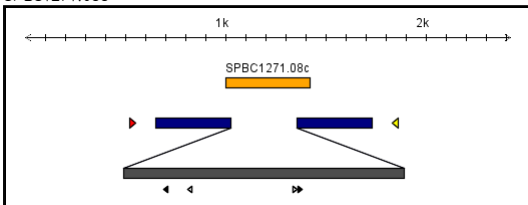

SPBC1271.09

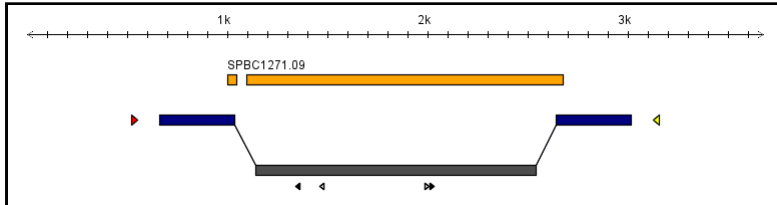

SPBC1271.10c

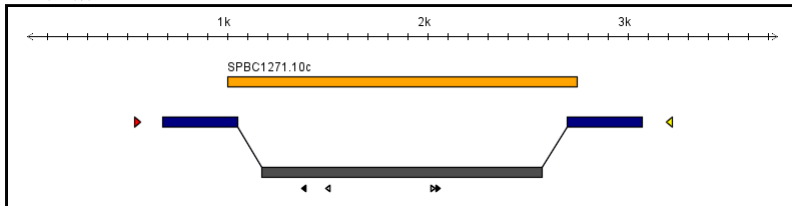

SPBC1271.11

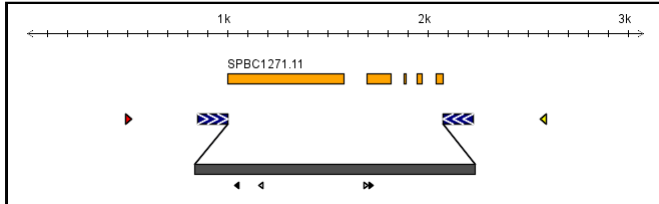

SPBC1271.12

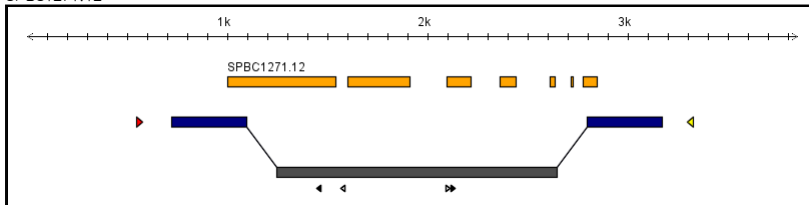

SPBC1271.13

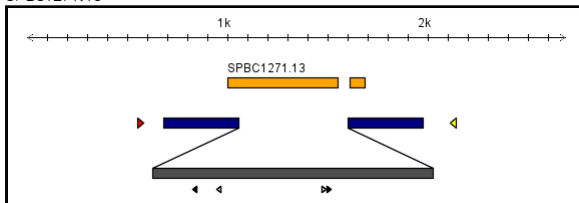

SPBC1271.14

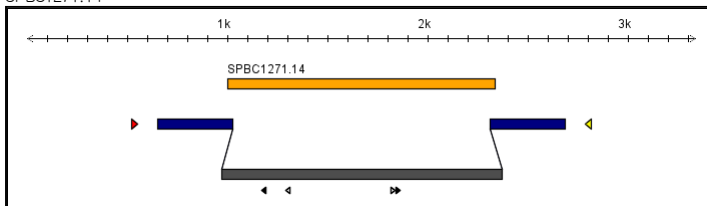

SPBC1289.01c

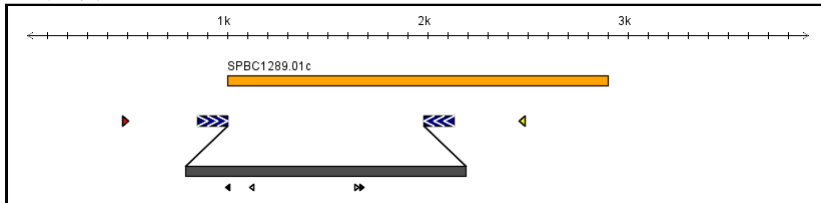

SPBC1289.02c

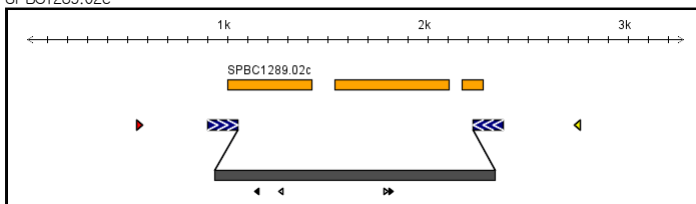

SPBC1289.03c

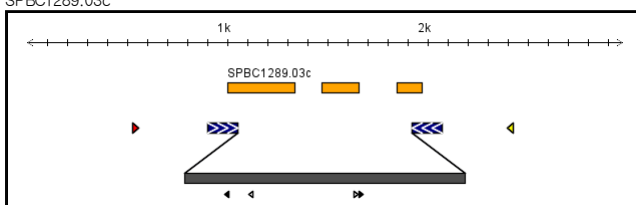



SPBC1289.05c

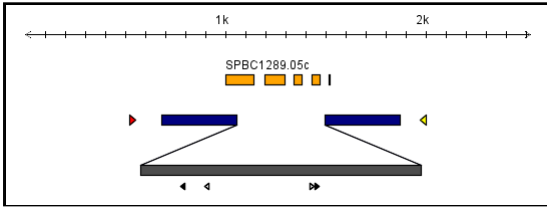

SPBC1289.06c

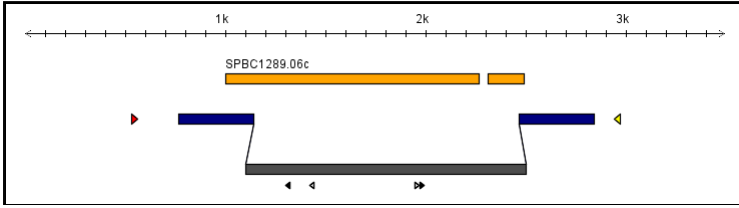

SPBC1289.07c

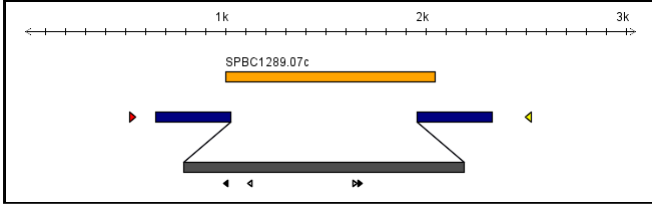

SPBC1289.08

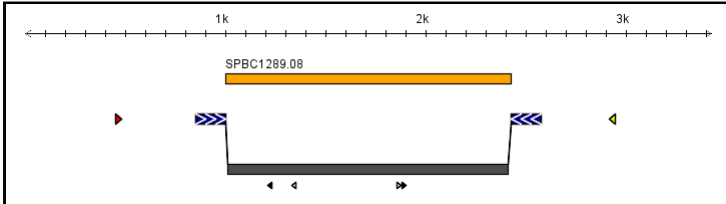

SPBC1289.09

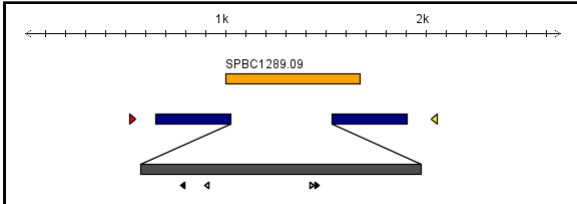

SPBC1289.11

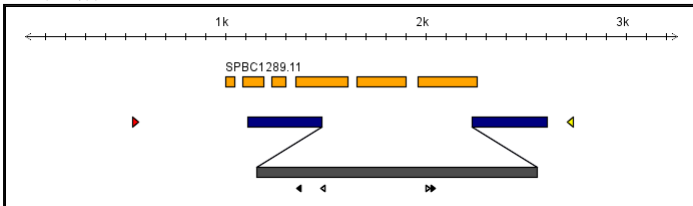

SPBC1289.12

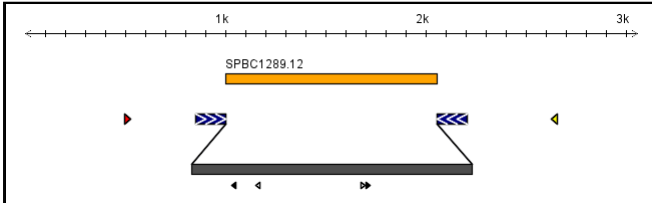

SPBC1289.13c

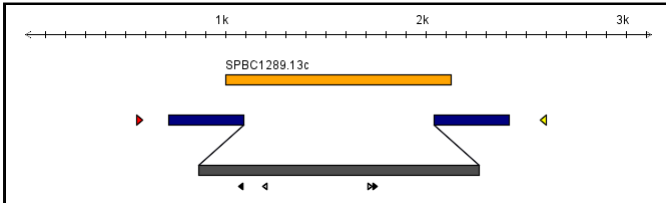

SPBC1289.14

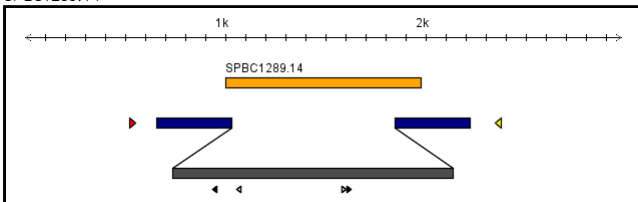

SPBC1289.16c

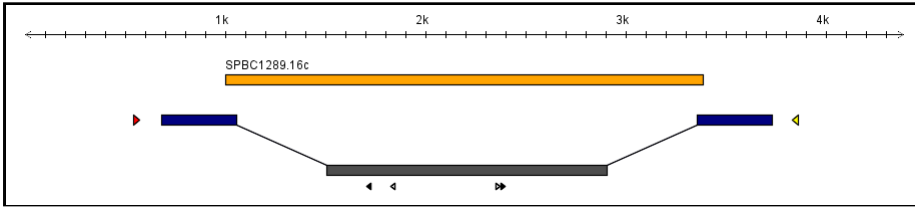

SPBC1306.01c

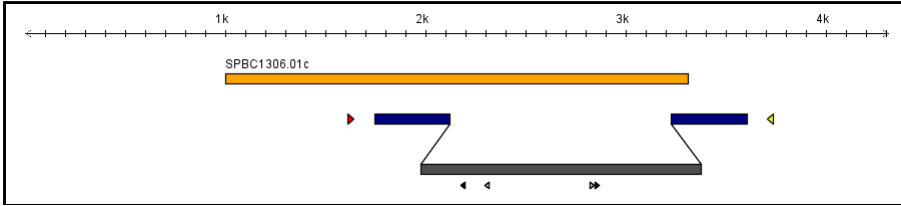

SPBC1347.02

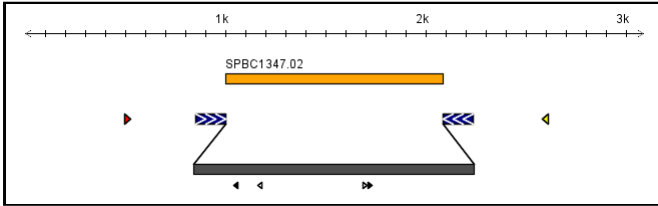

SPBC1347.03

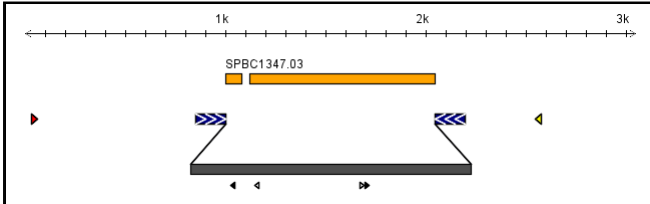

SPBC1347.04

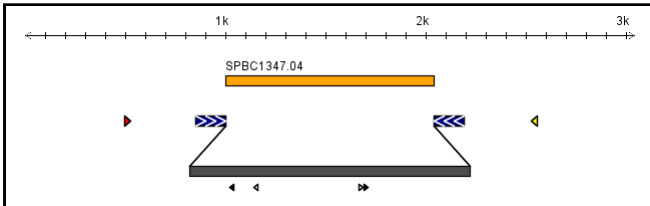

SPBC1347.05c

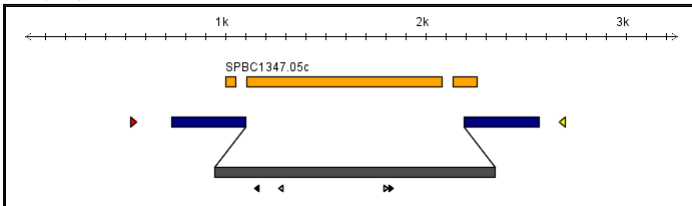

SPBC1347.06c

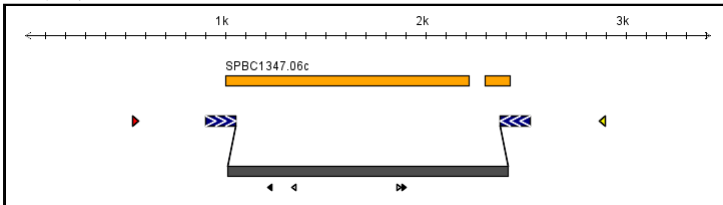

SPBC1347.07

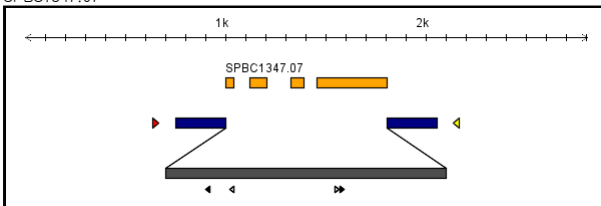

SPBC1347.08c

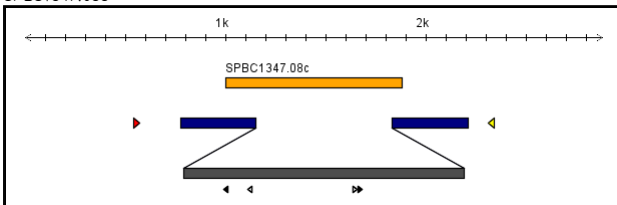

SPBC1347.09

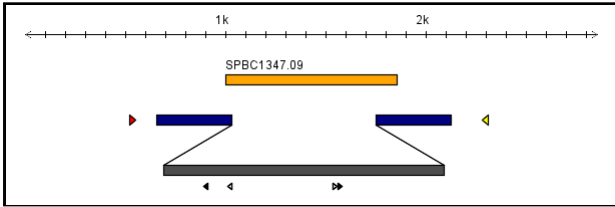

SPBC1347.10

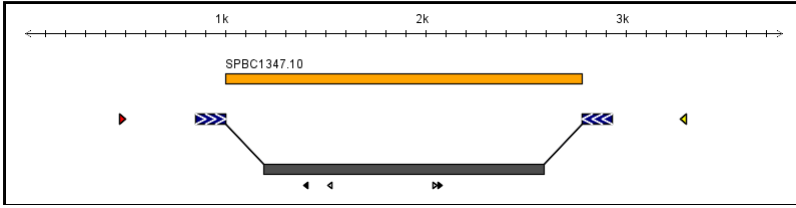

SPBC1347.11

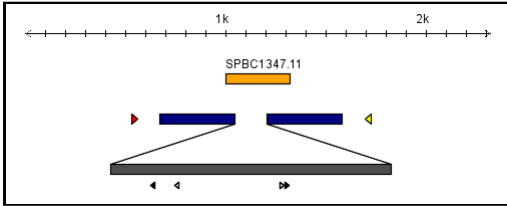

SPBC1347.12

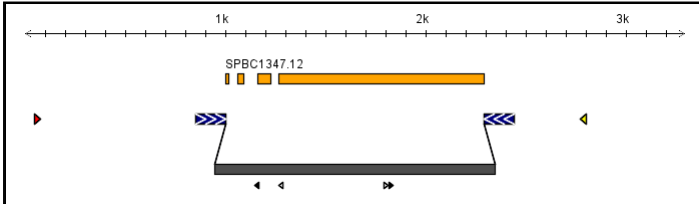

SPBC1347.13c

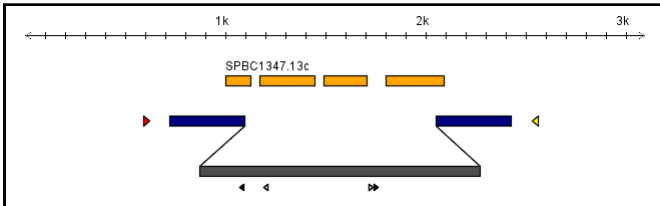

SPBC1348.01

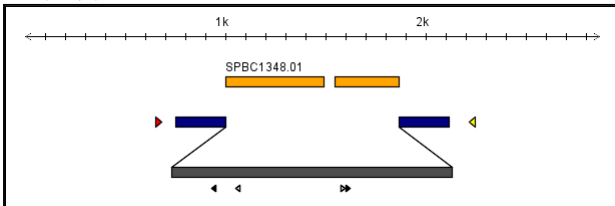

SPBC1348.02

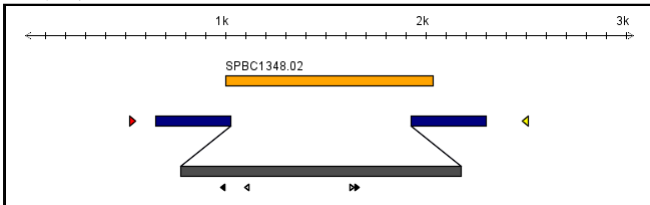

SPBC1348.04

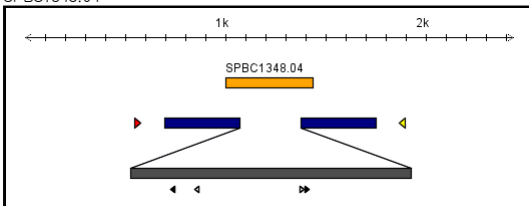

SPBC1348.05

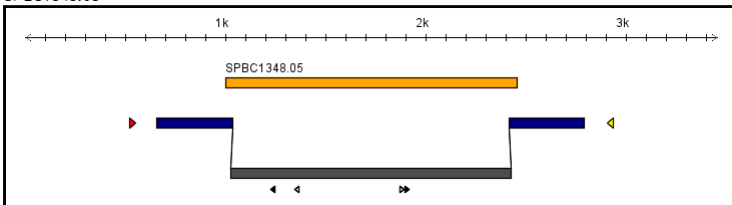

SPBC1348.06c

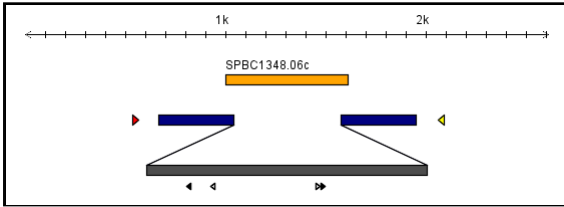

SPBC1348.07

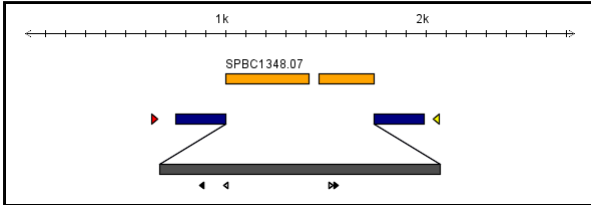

SPBC1348.08c

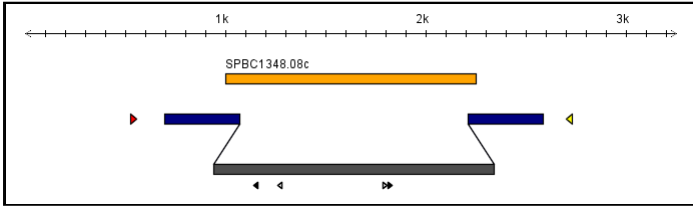

SPBC1348.09

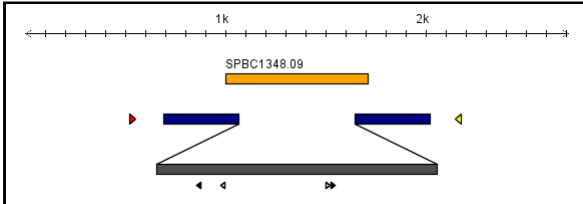

SPBC1348.10c

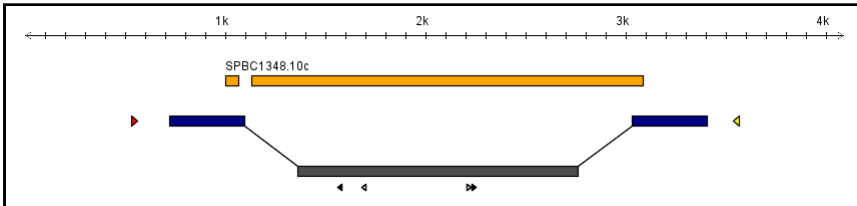

SPBC1348.14c

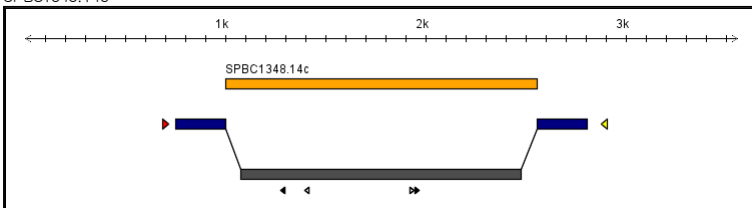

SPBC146.02

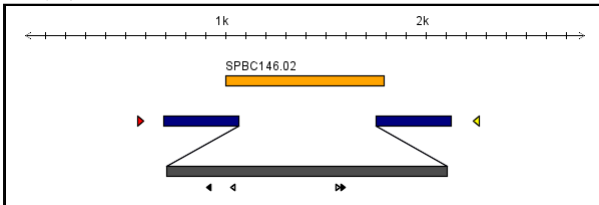

SPBC146.04

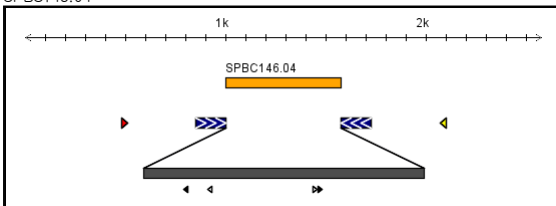

SPBC146.05c

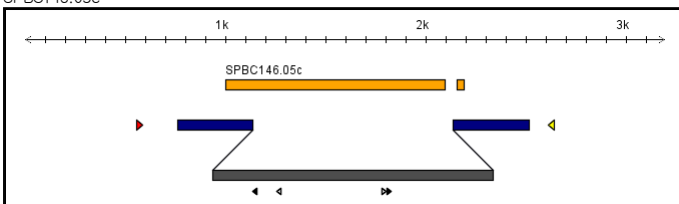

SPBC146.06c

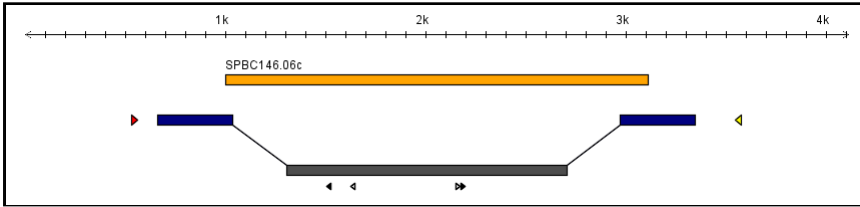

SPBC146.07

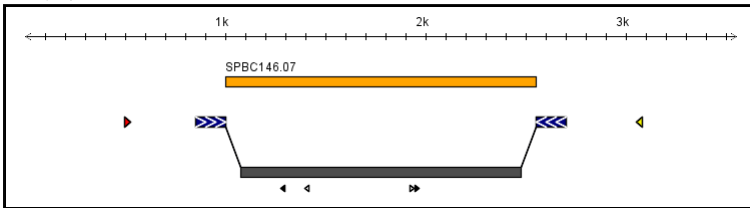

SPBC146.08c

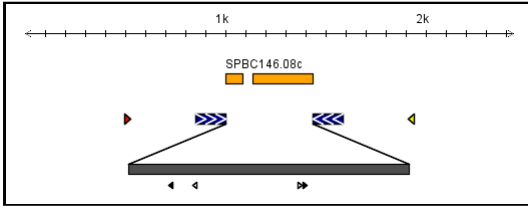

SPBC146.09c

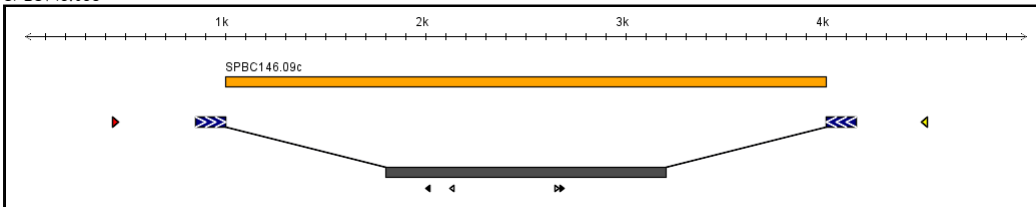

SPBC146.10

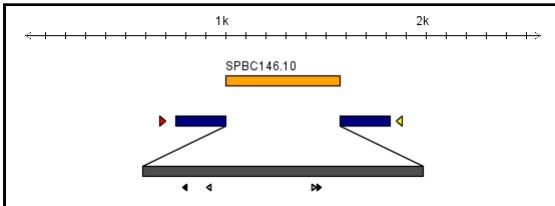

SPBC146.11c

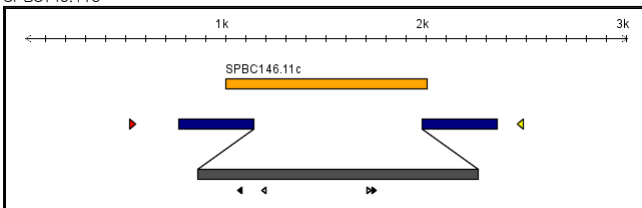

SPBC146.12

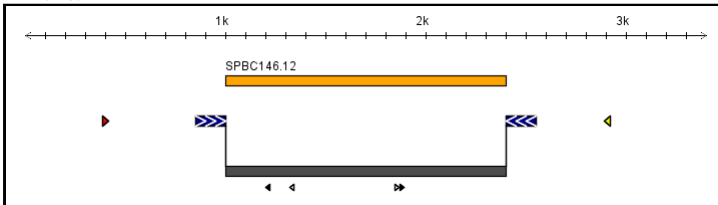

SPBC146.14c

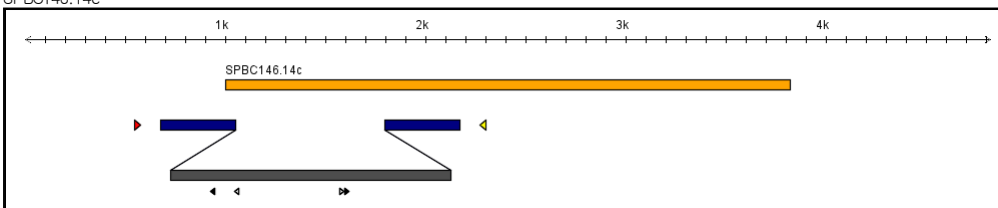

SPBC1539.01c

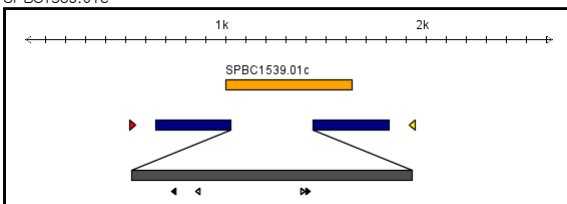

SPBC1539.02

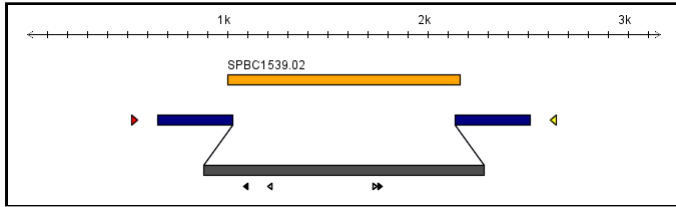

SPBC1539.03c

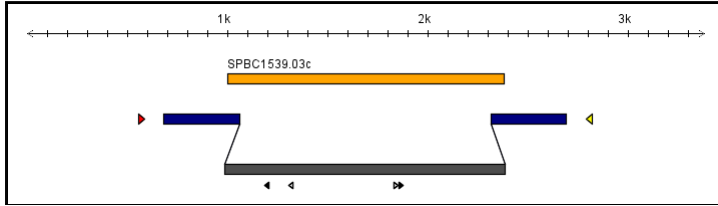

SPBC1539.04

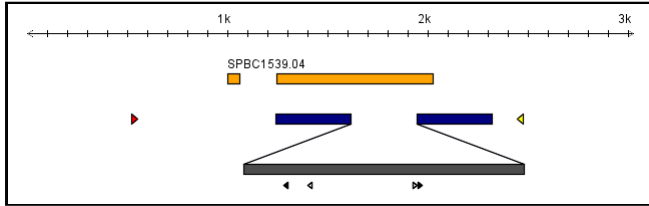

SPBC1539.06

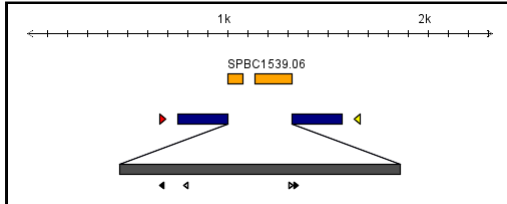

SPBC1539.07c

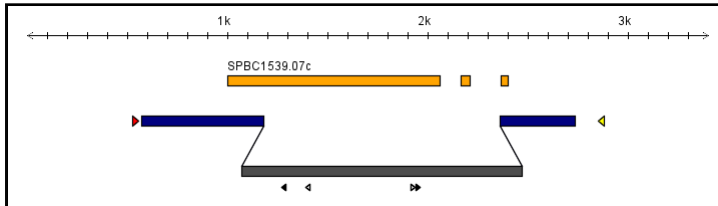

SPBC1539.08

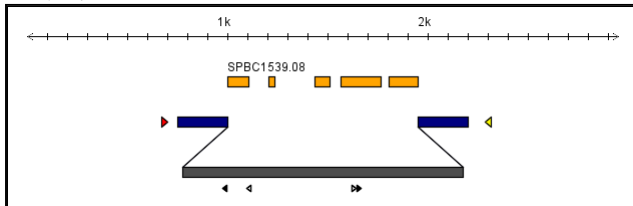

SPBC1539.10

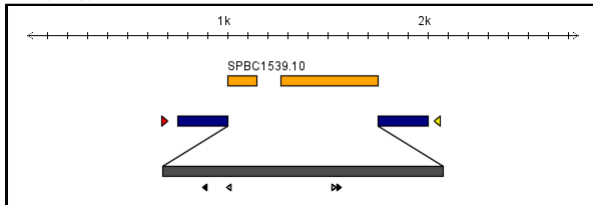

SPBC1604.01

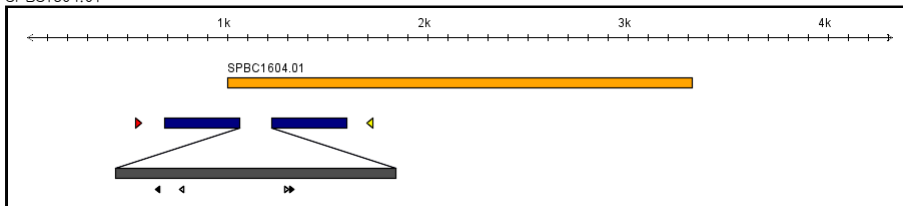

SPBC1604.02c

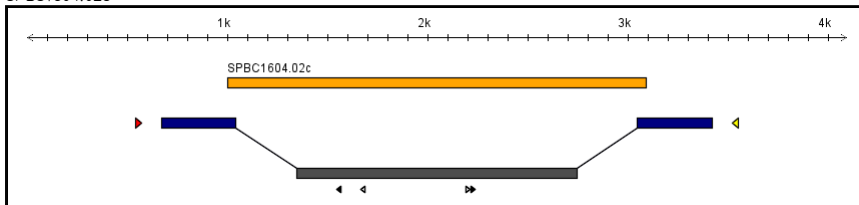

SPBC1604.03c

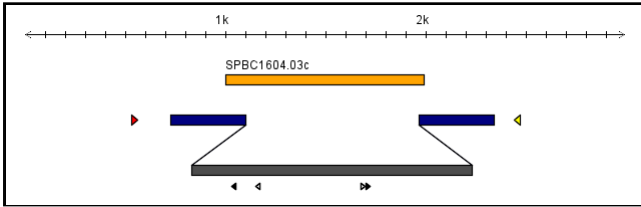

SPBC1604.04

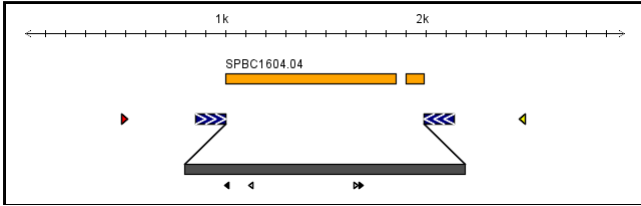

SPBC1604.05

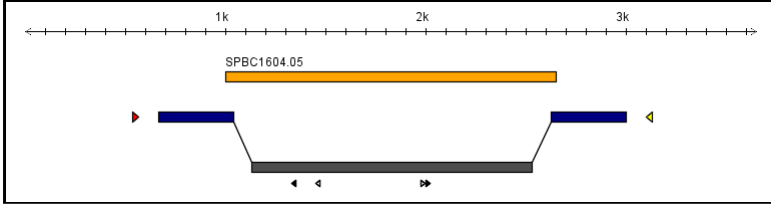

SPBC1604.06c

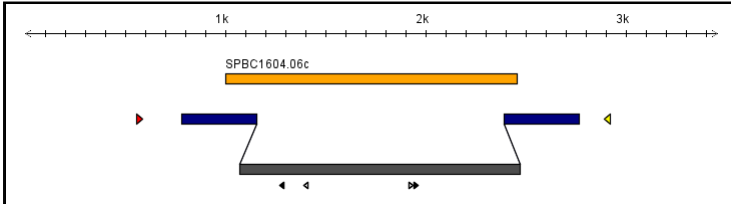

SPBC1604.07

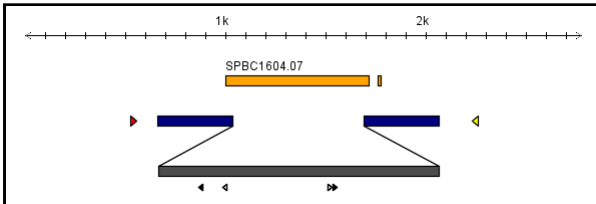

SPBC1604.08c

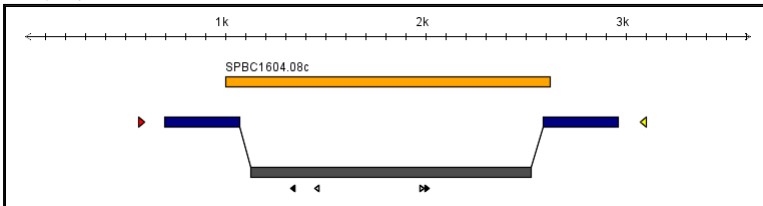

SPBC1604.09c

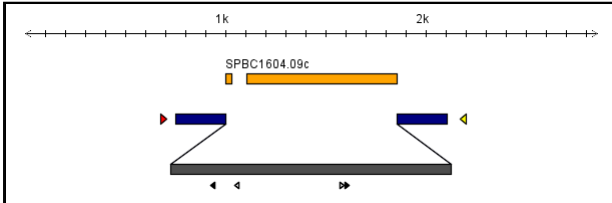

SPBC1604.10

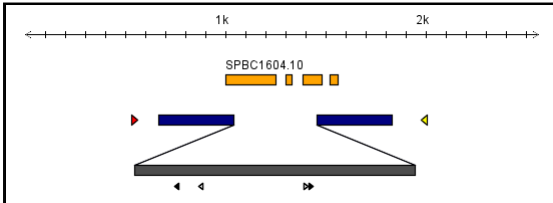

SPBC1604.11

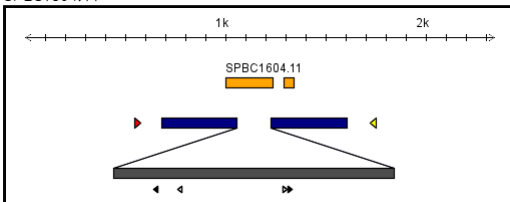

SPBC1604.13c

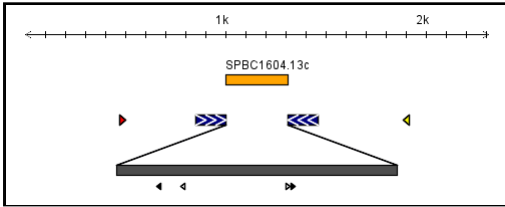

SPBC1604.15

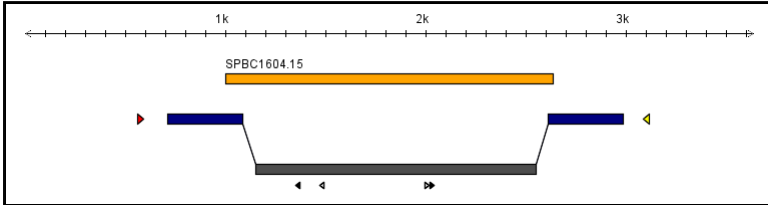

SPBC1604.16c

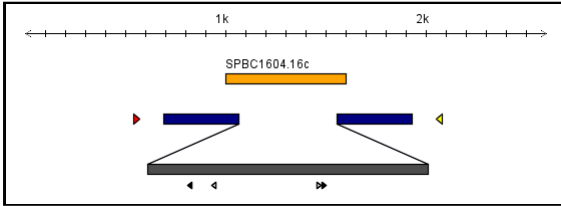

SPBC1604.17c

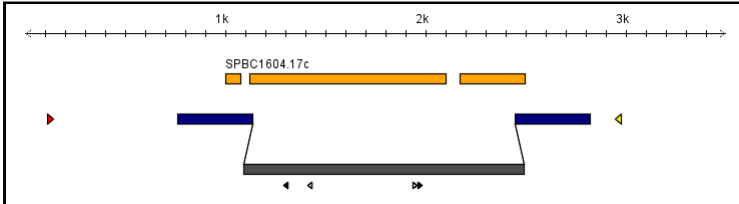

SPBC1604.18c

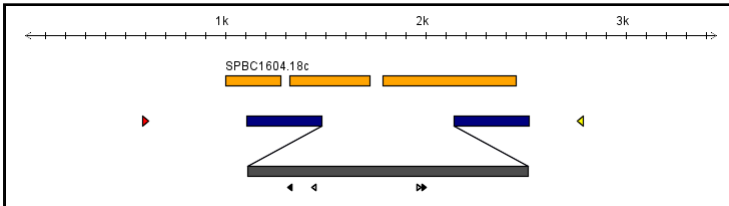

SPBC1604.19c

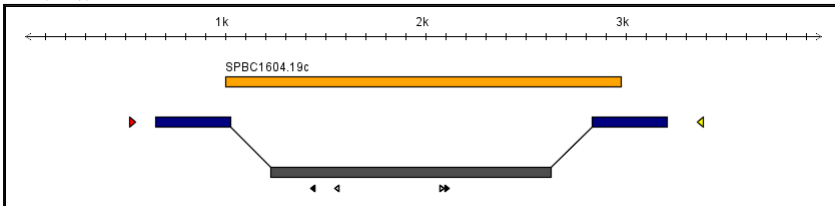

SPBC1604.20c

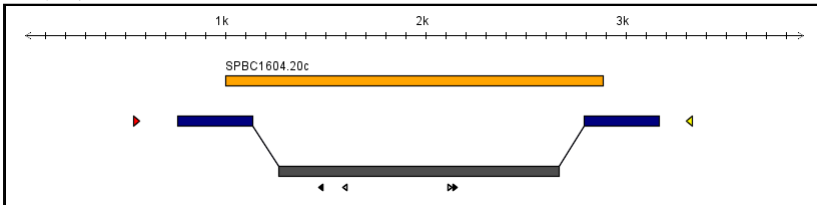

SPBC1604.21c

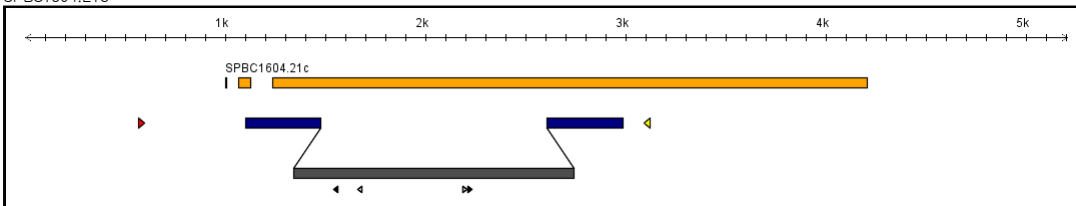

SPBC1652.01

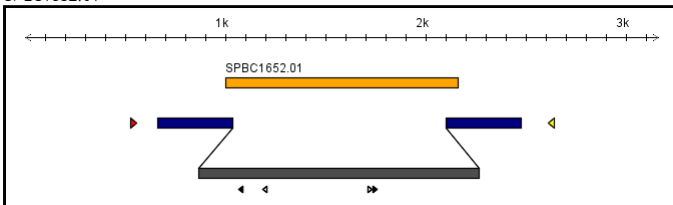



SPBC1652.02

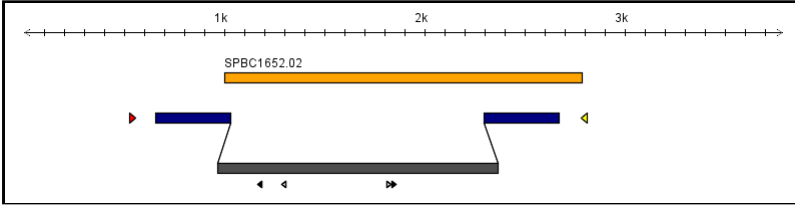

SPBC1677.03c

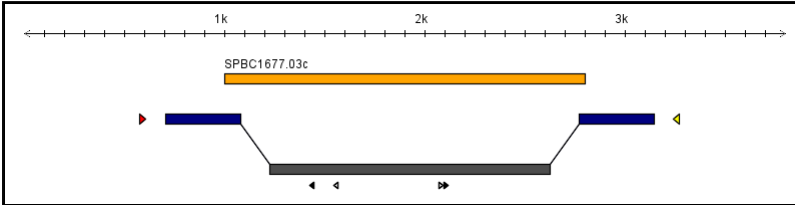

SPBC1683.01

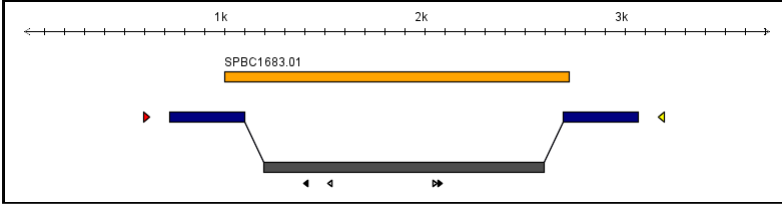

SPBC1683.02

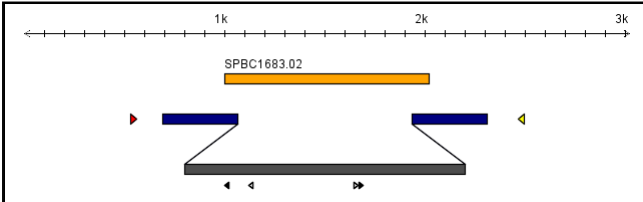

SPBC1683.03c

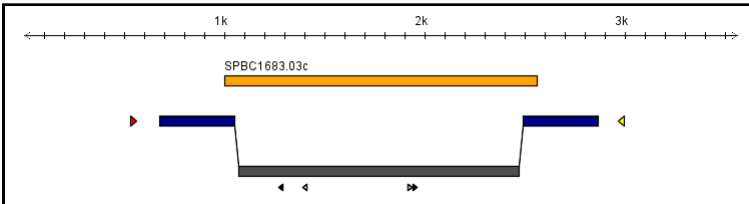

SPBC1683.05

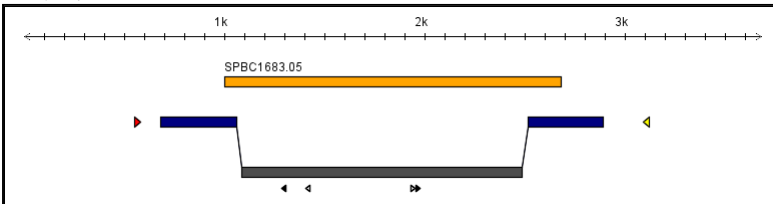

SPBC1683.06c

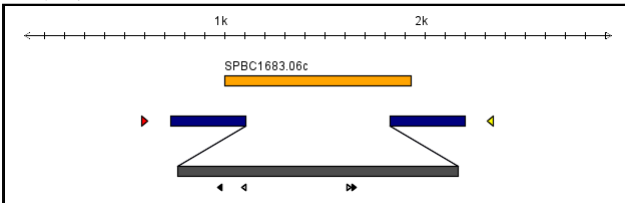

SPBC1683.07

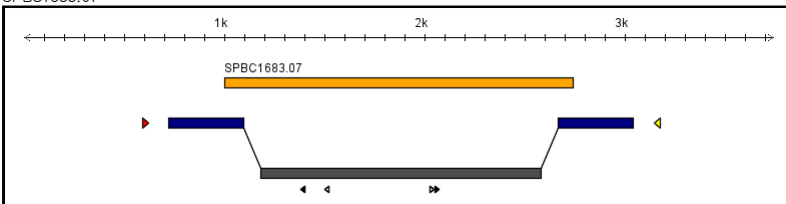

SPBC1683.08

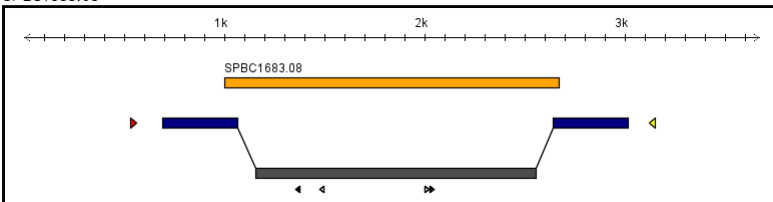

SPBC1683.09c

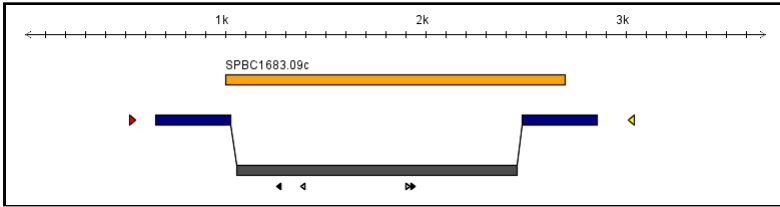

SPBC1683.10c

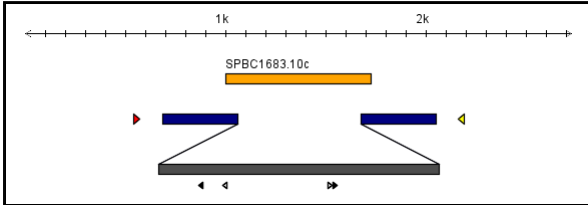

SPBC1683.11c

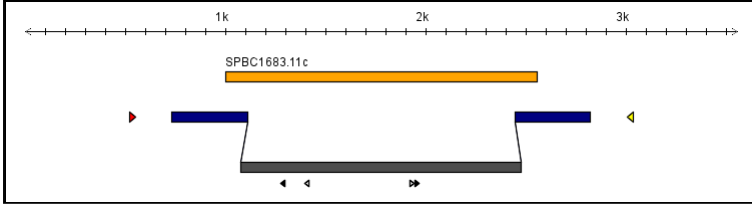

SPBC1683.12

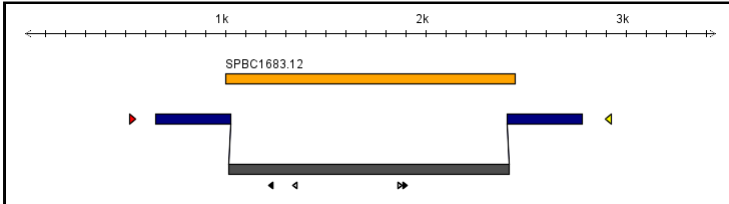

SPBC1685.01

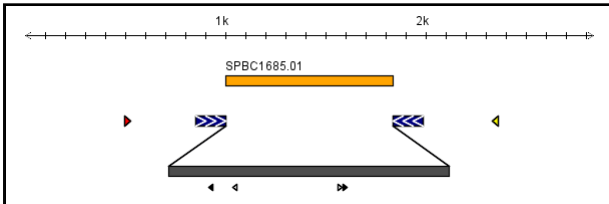

SPBC1685.02c

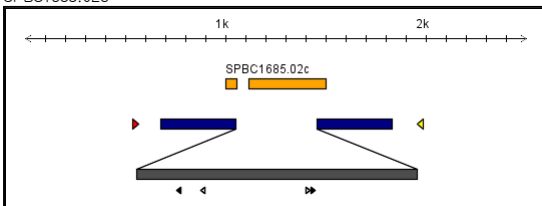

SPBC1685.04

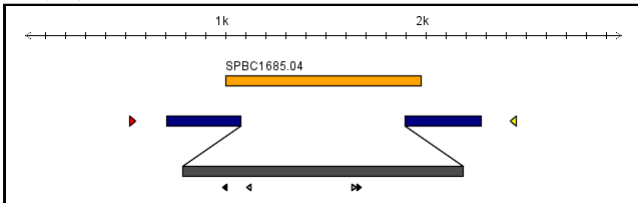

SPBC1685.06

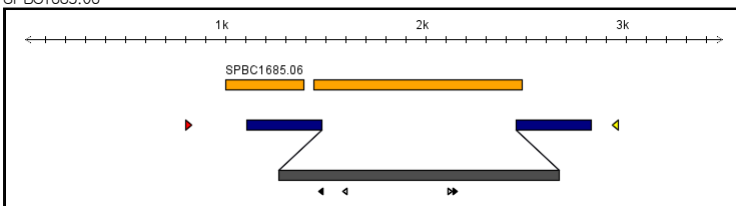

SPBC1685.07c

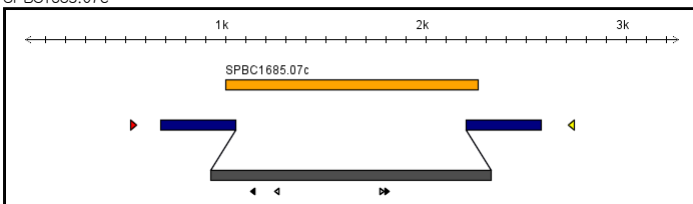

SPBC1685.08

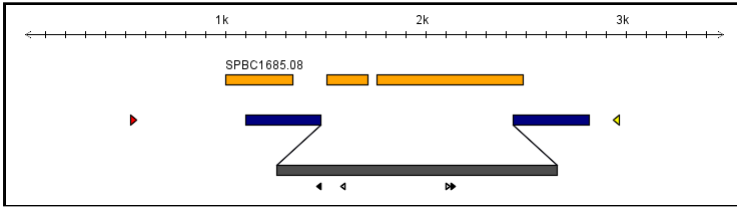

SPBC1685.09

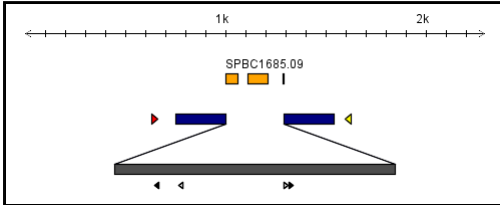

SPBC1685.10

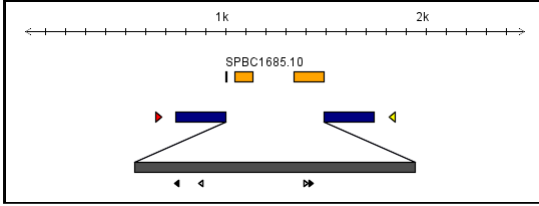

SPBC1685.11

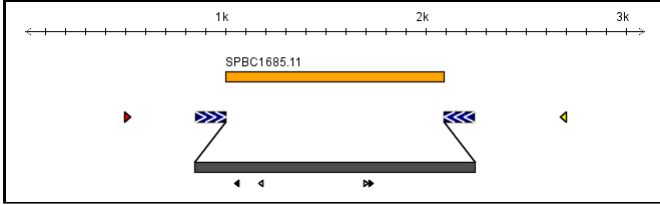

SPBC1685.13

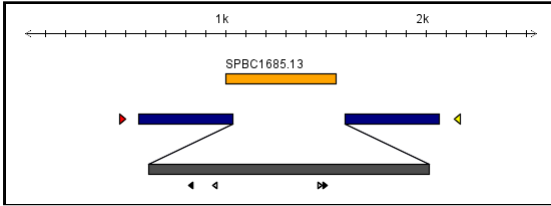

SPBC1685.15c

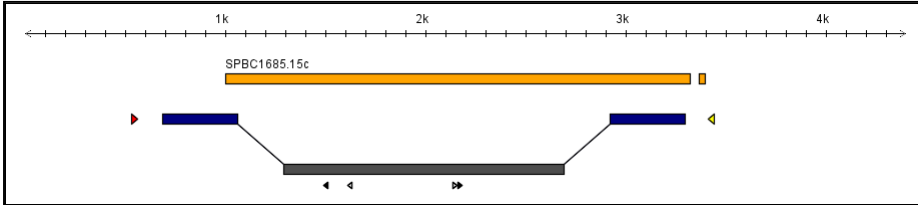

SPBC1685.16

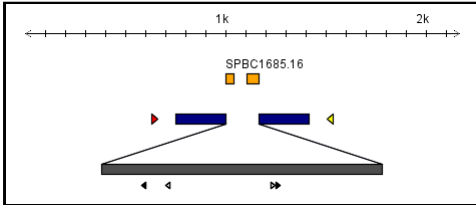

SPBC1703.01c

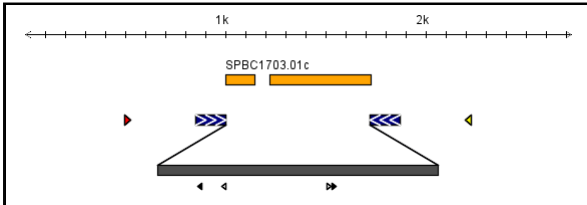

SPBC1703.02

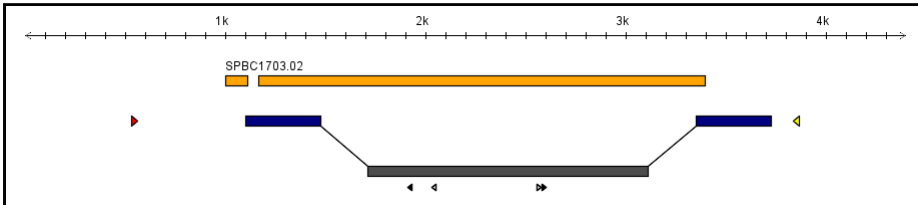

SPBC1703.03c

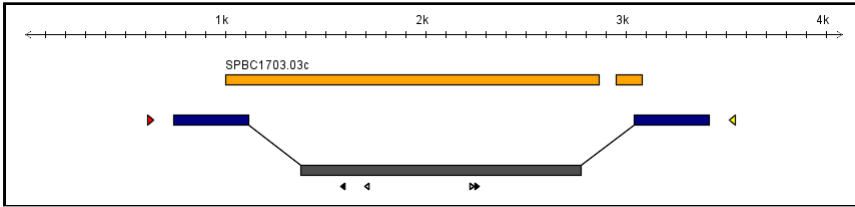

SPBC1703.05

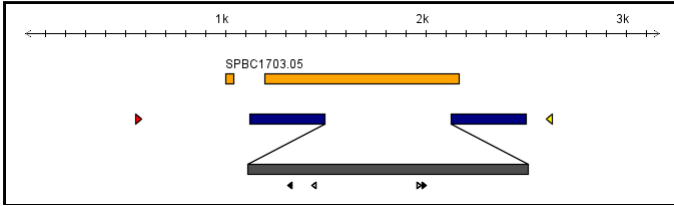

SPBC1703.06

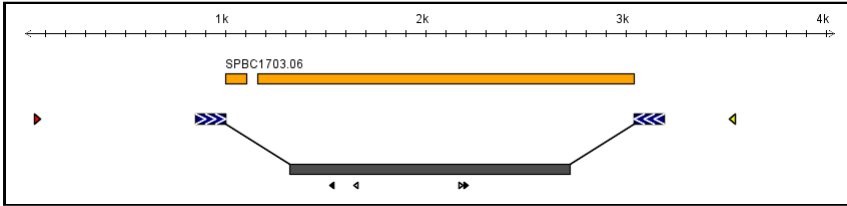

SPBC1703.07

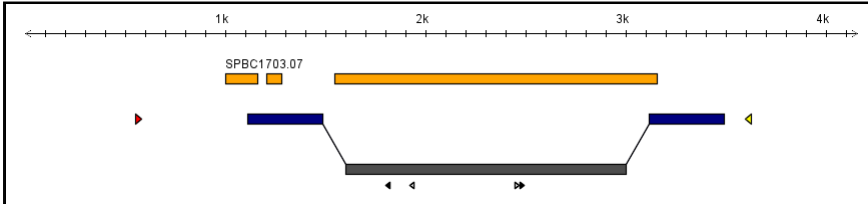

SPBC1703.08c

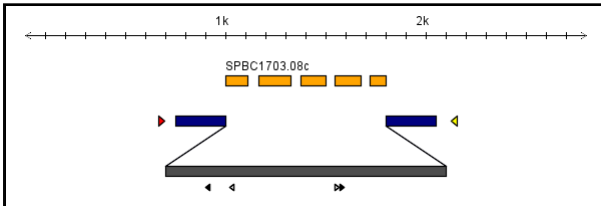

SPBC1703.09

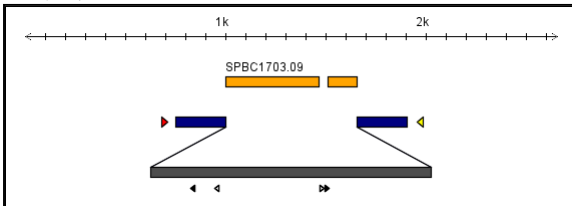

SPBC1703.11

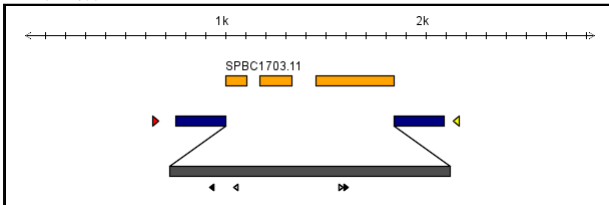

SPBC1703.12

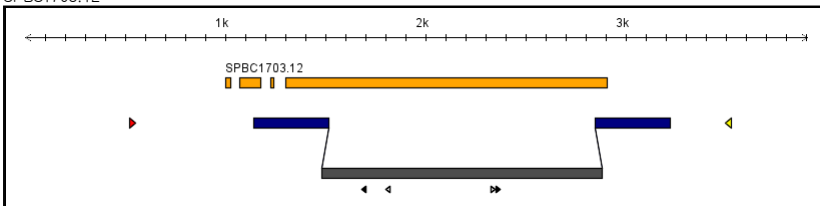

SPBC1703.13c

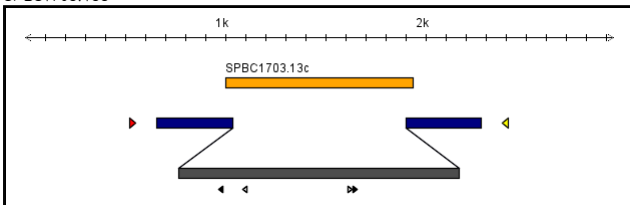

SPBC1709.01

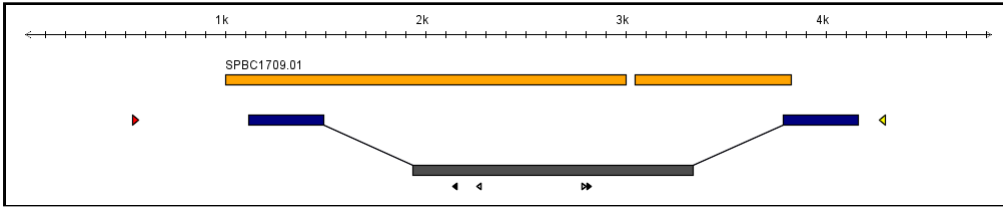

SPBC1709.03

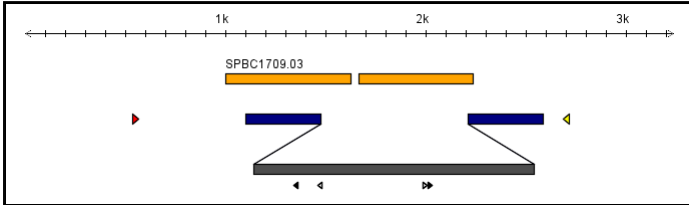

SPBC1709.04c

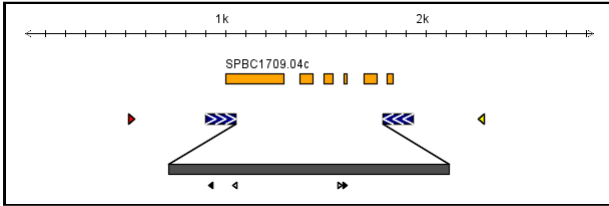

SPBC1709.05

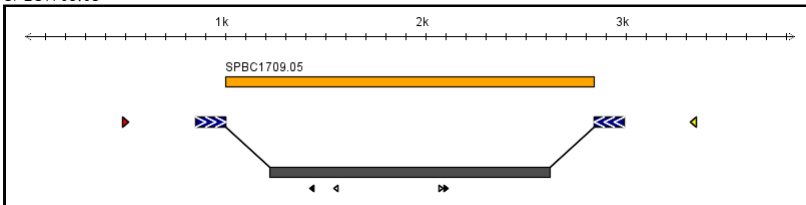

SPBC1709.06

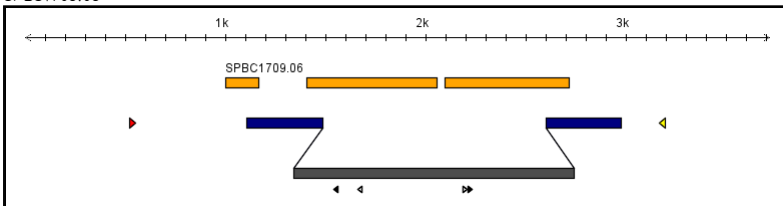

SPBC1709.07

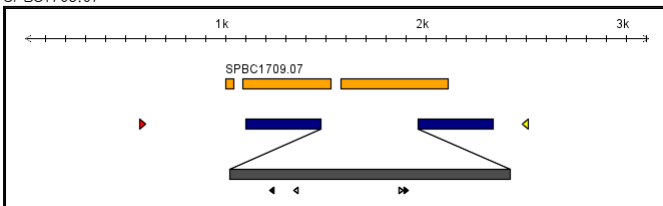

SPBC1709.09

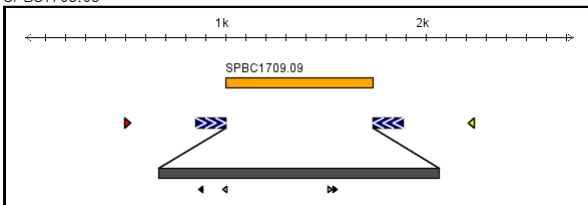

SPBC1709.10c

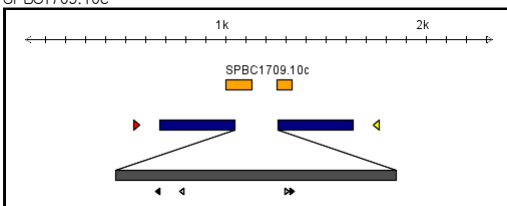

SPBC1709.11c

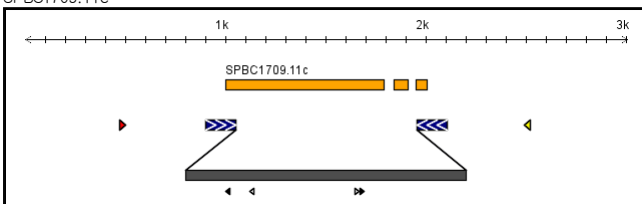

SPBC1709.12

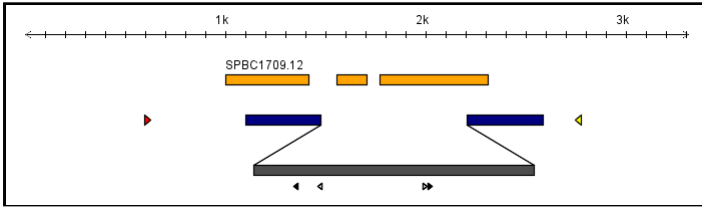

SPBC1709.13c

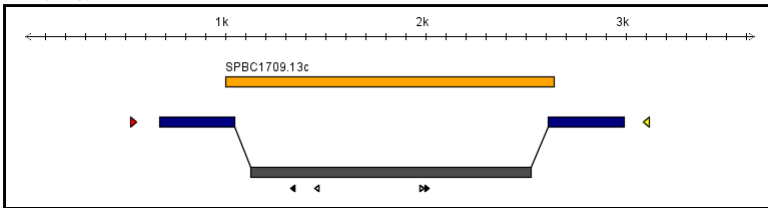

SPBC1709.14

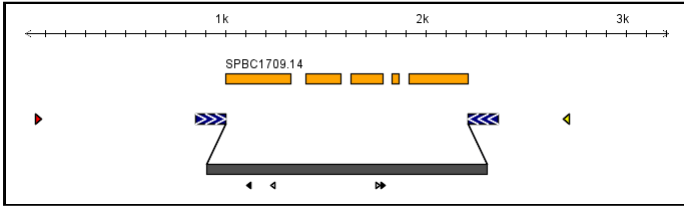

SPBC1709.16c

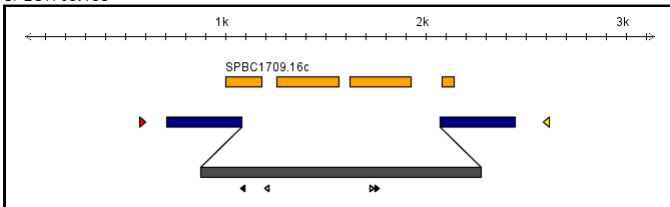

SPBC1709.17

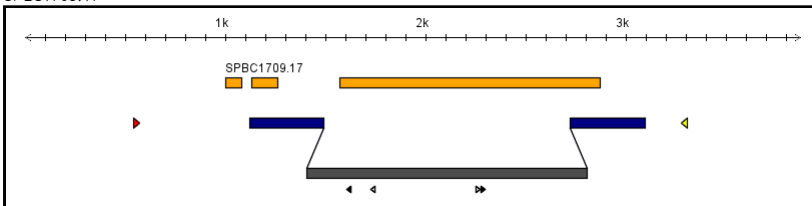

SPBC1709.18

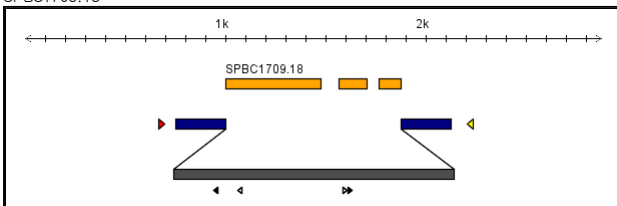

SPBC1709.20

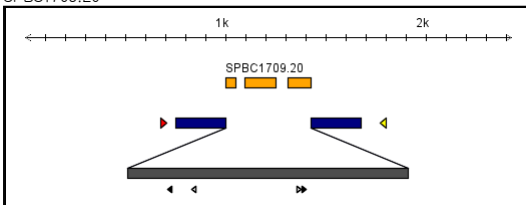

SPBC1711.01c

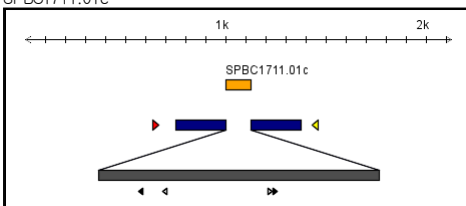

SPBC1711.02

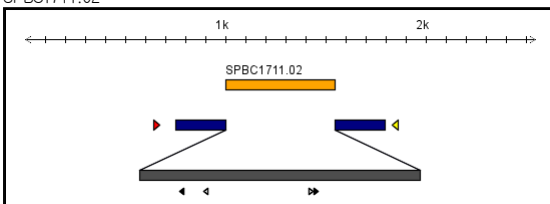

SPBC1711.03

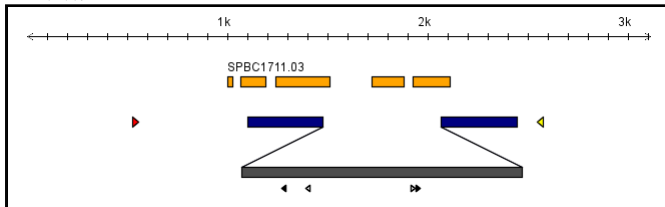

SPBC1711.04

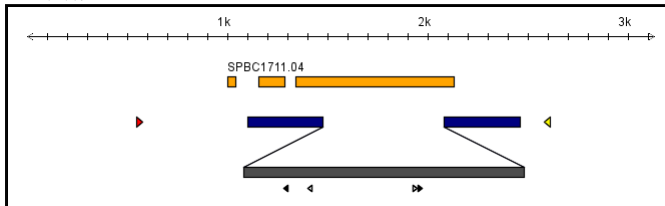

SPBC1711.05

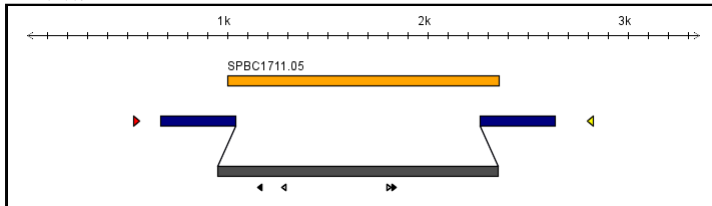

SPBC1711.06

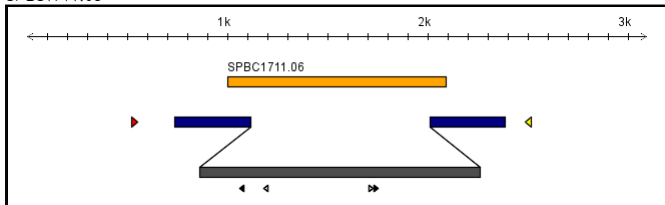

SPBC1711.07

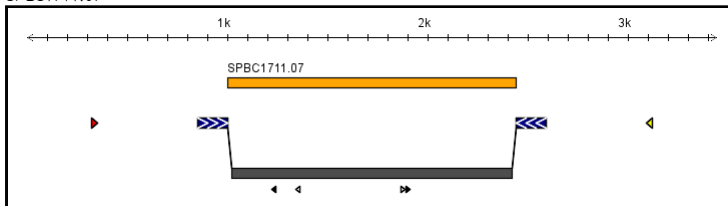

SPBC1711.08

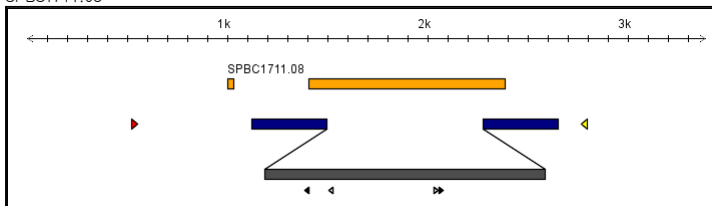

SPBC1711.09c

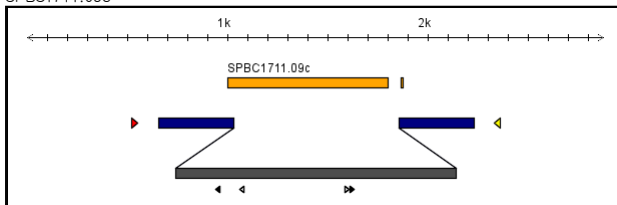

SPBC1711.10c

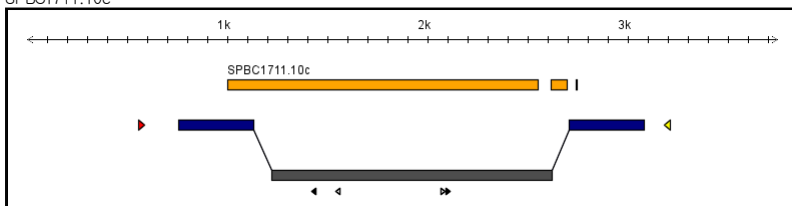

SPBC1711.11

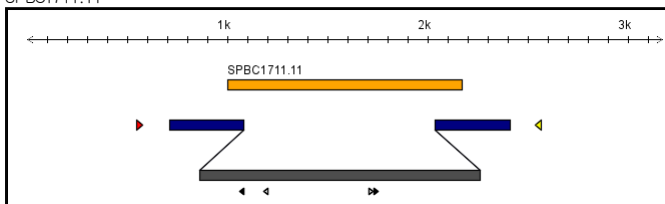

SPBC1711.12

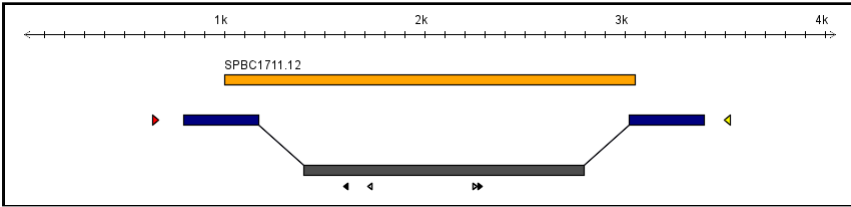

SPBC1711.13

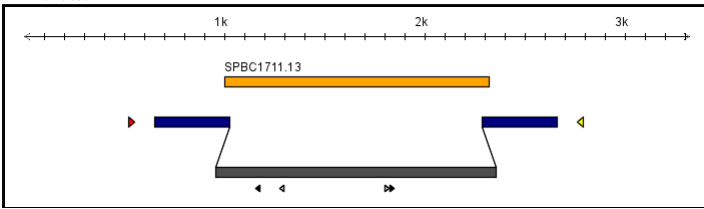

SPBC1711.14

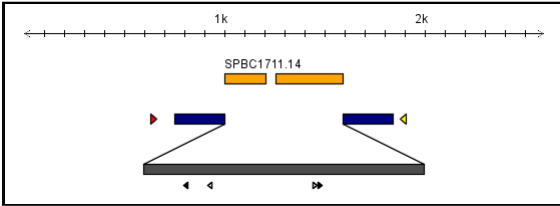

SPBC1711.15c

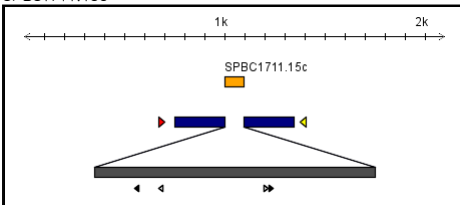

SPBC1711.16

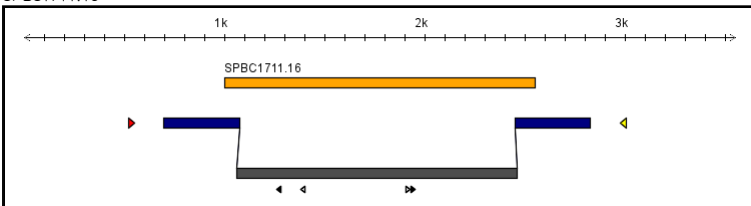

SPBC1718.01

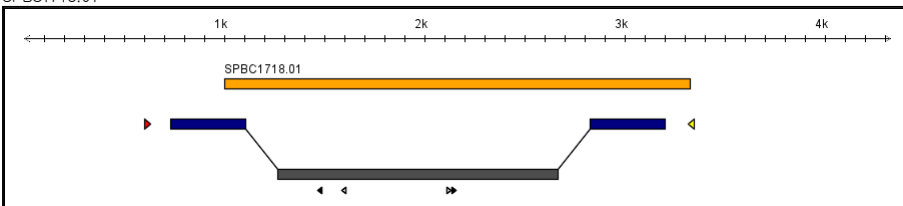

SPBC1718.02

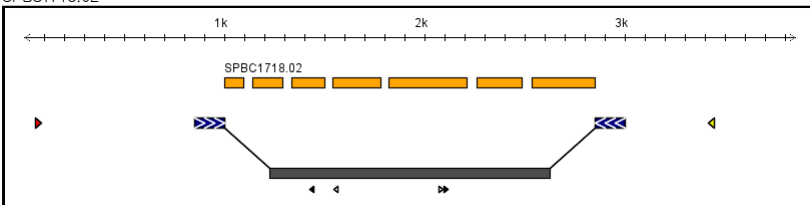

SPBC1718.03

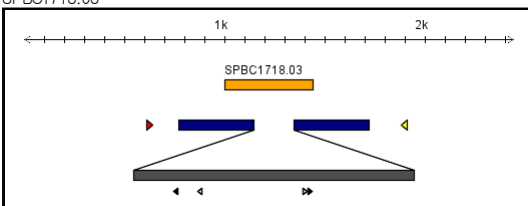

SPBC1718.04

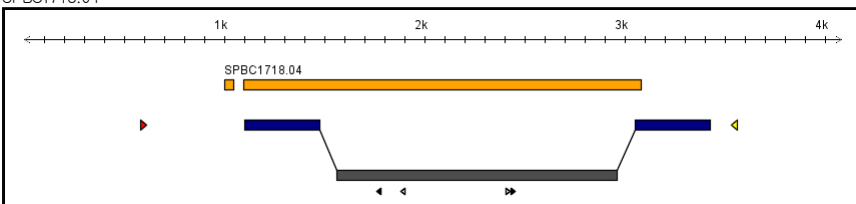



SPBC1718.05

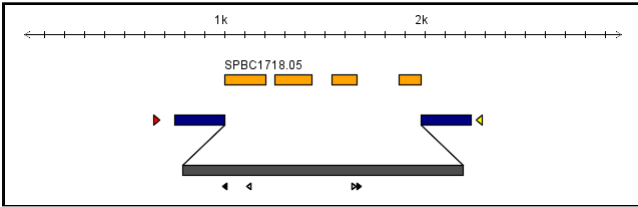

SPBC1718.07c

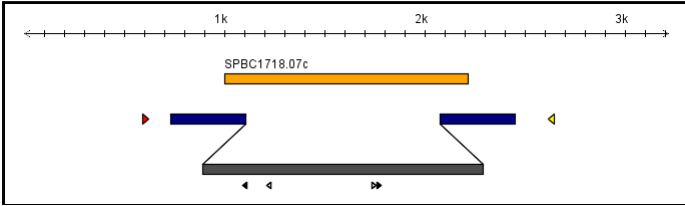

SPBC1734.01c

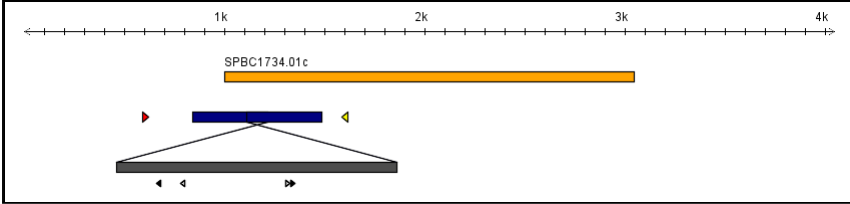

SPBC1734.02c

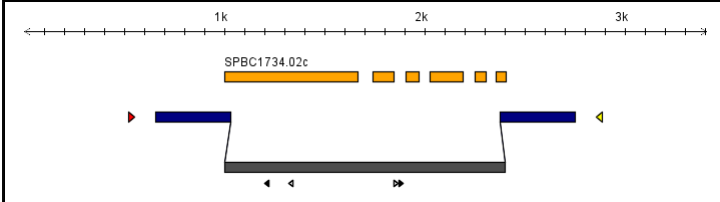

SPBC1734.03

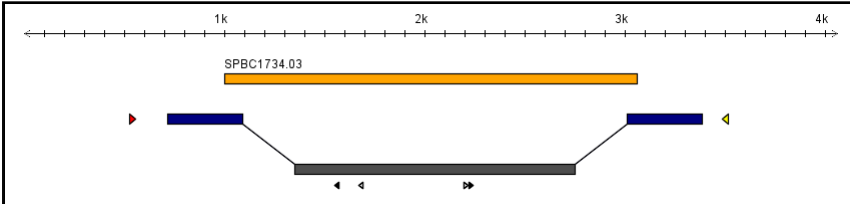

SPBC1734.04

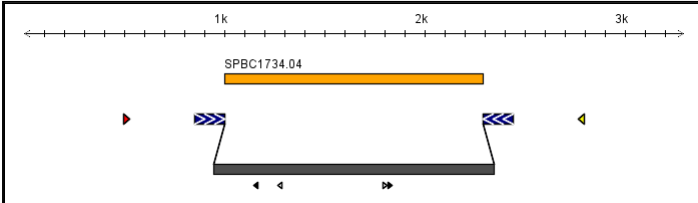

SPBC1734.05c

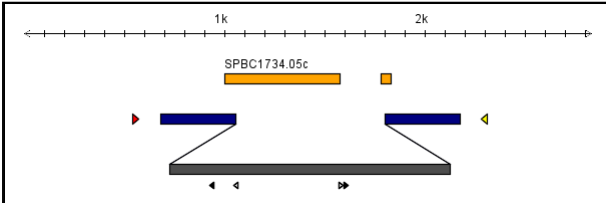

SPBC1734.06

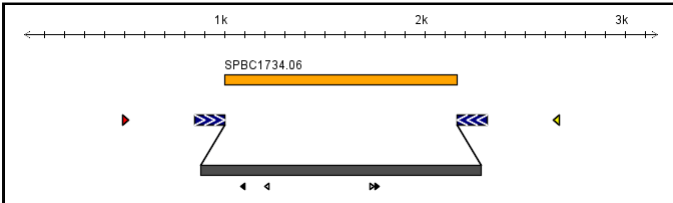

SPBC1734.07c

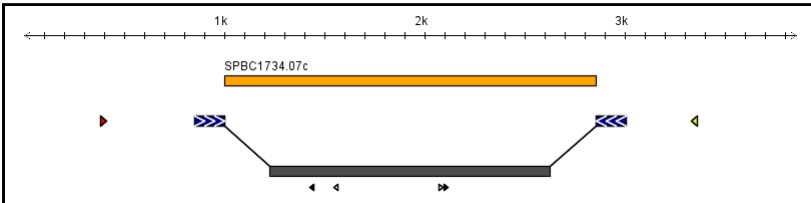

SPBC1734.08

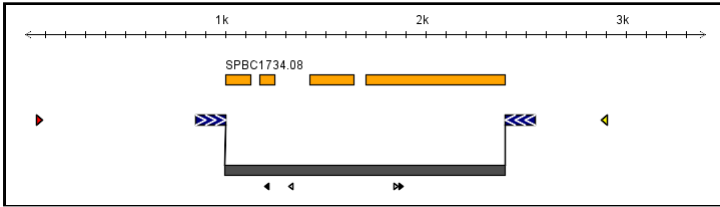

SPBC1734.09

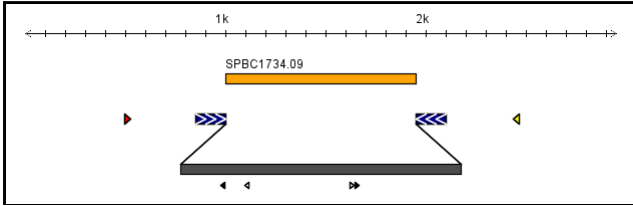

SPBC1734.10c

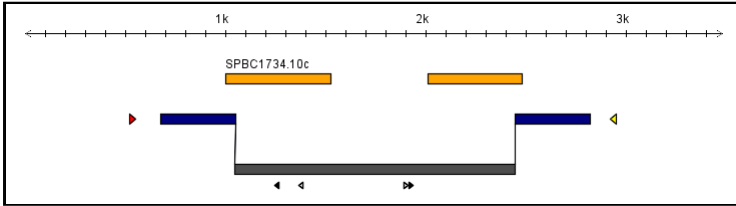

SPBC1734.11

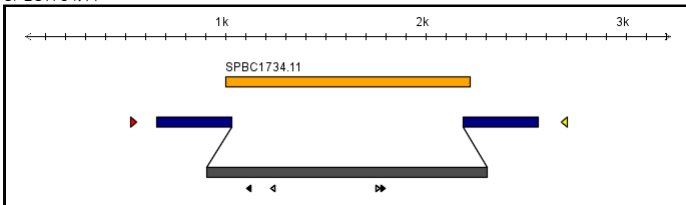

SPBC1734.12c

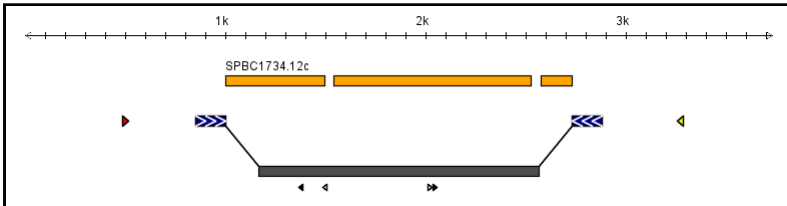

SPBC1734.13

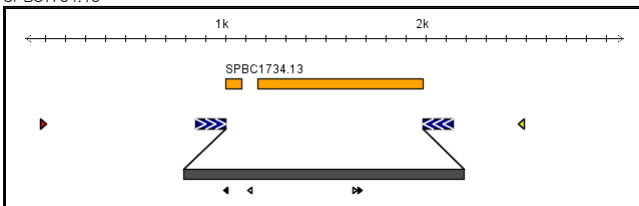

SPBC1734.14c

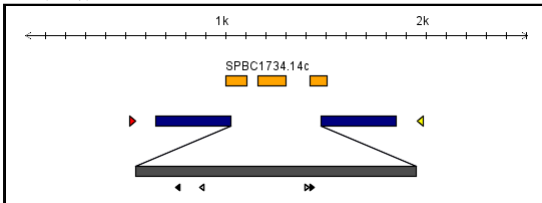

SPBC1734.15

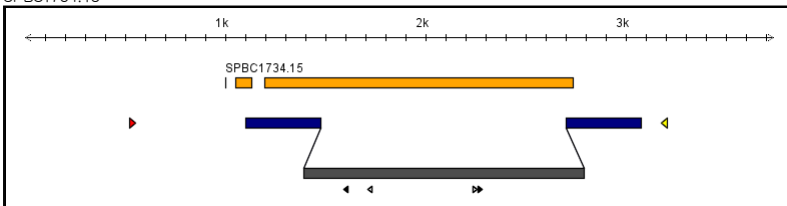

SPBC1734.16c

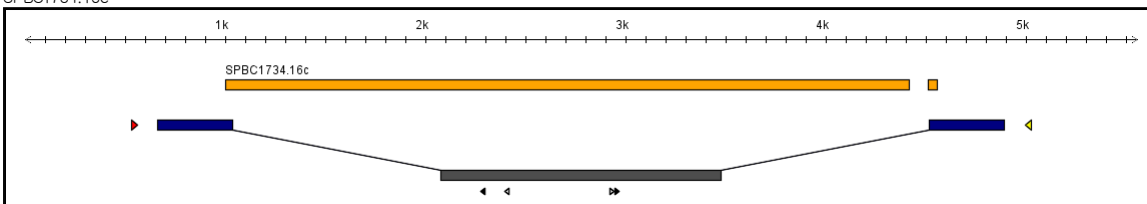

SPBC1773.01

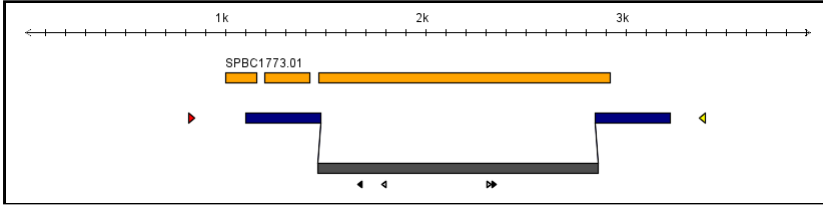

SPBC1773.02c

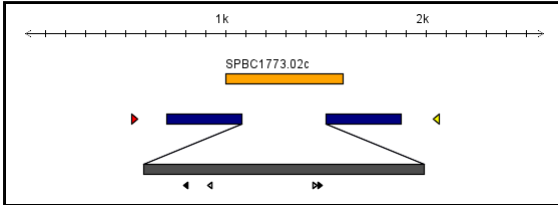

SPBC1773.03c

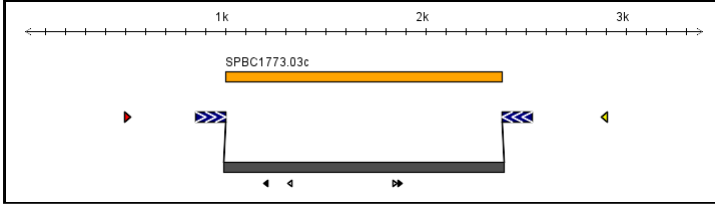

SPBC1773.04

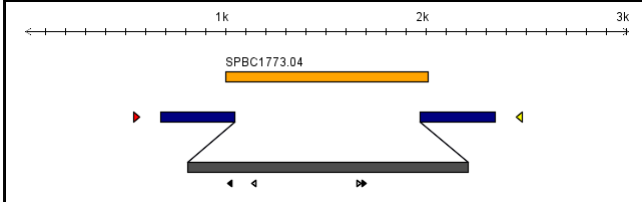

SPBC1773.05c

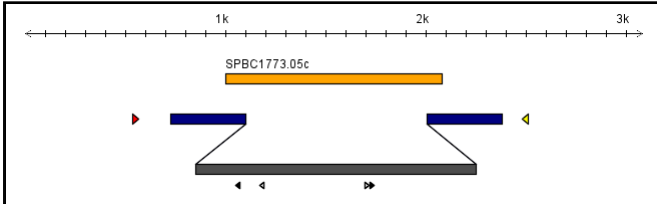

SPBC1773.06c

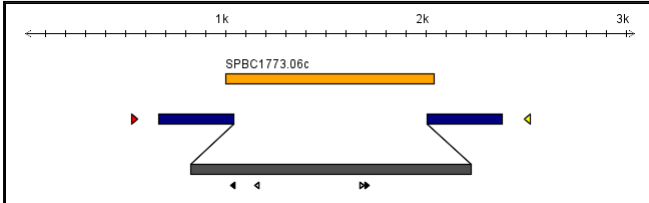

SPBC1773.07c

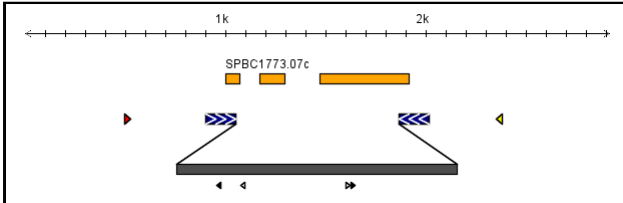

SPBC1773.08c

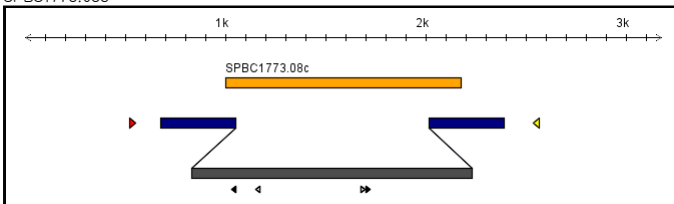

SPBC1773.09c

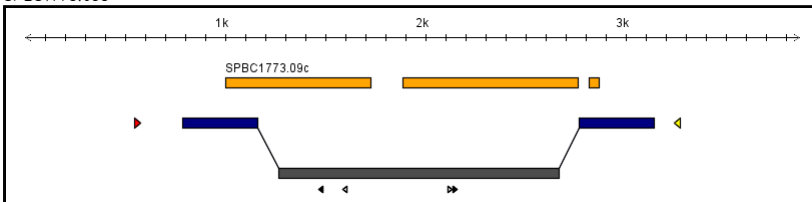

SPBC1773.10c

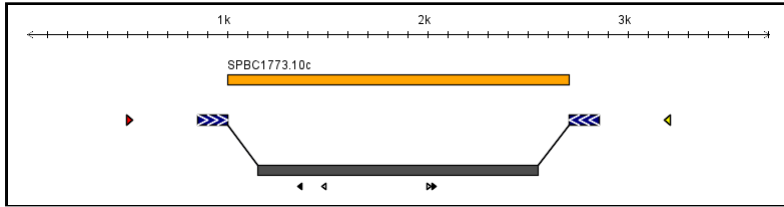

SPBC1773.11c

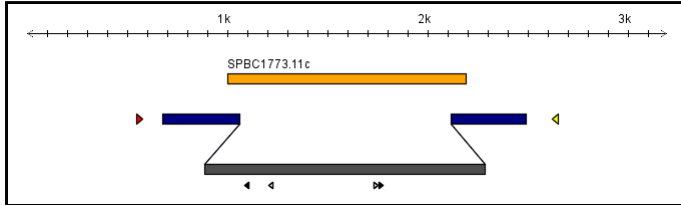

SPBC1773.12

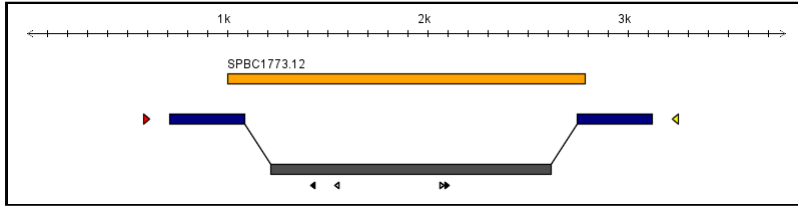

SPBC1773.13

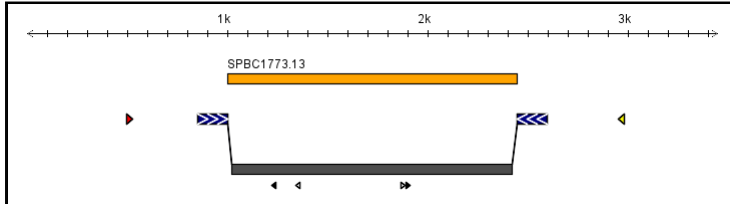

SPBC1773.14

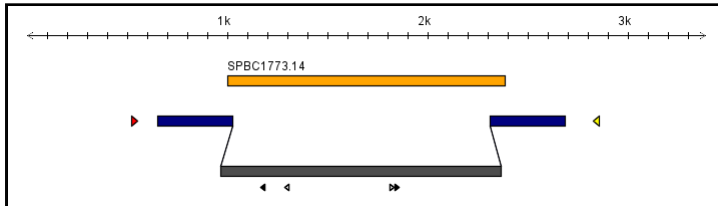

SPBC1773.15

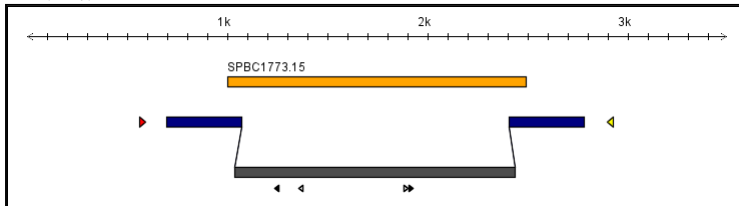

SPBC1773.16c

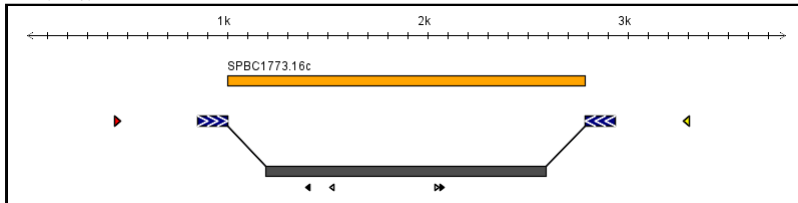

SPBC1778.01c

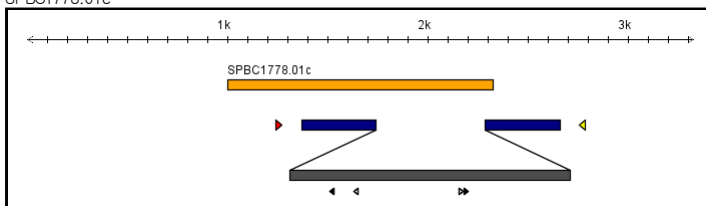

SPBC1778.02

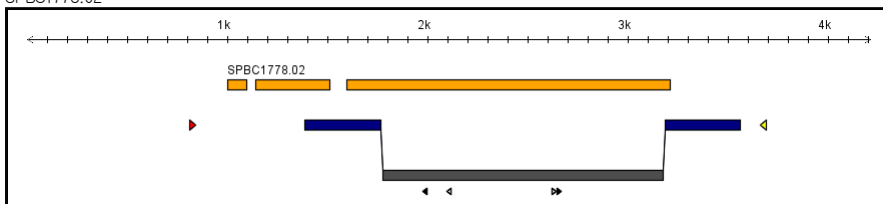

SPBC1778.03c

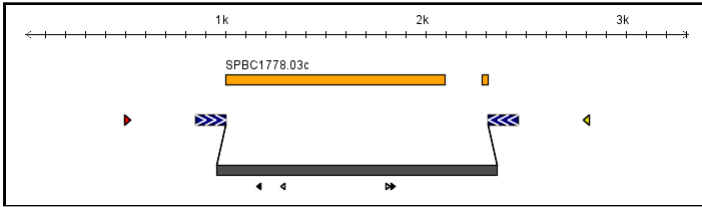

SPBC1778.04

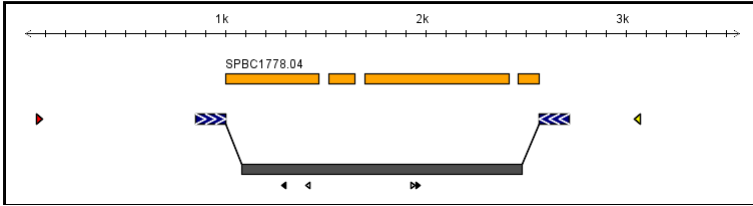

SPBC1778.05c

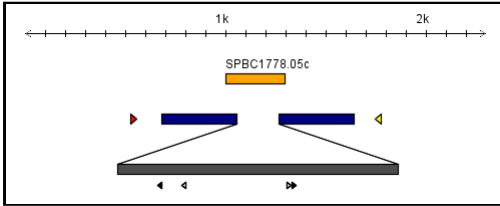

SPBC1778.06c

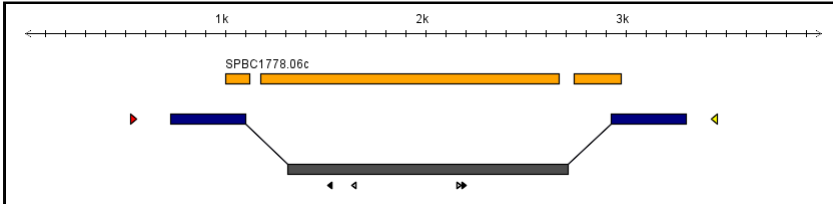

SPBC1778.07

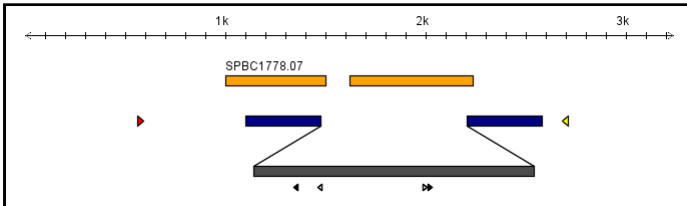

SPBC1778.08c

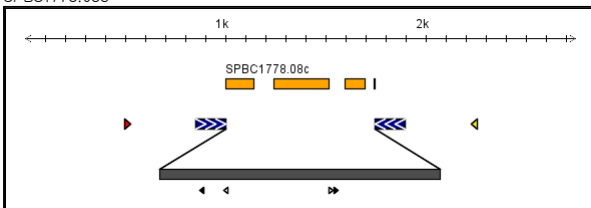

SPBC1778.09

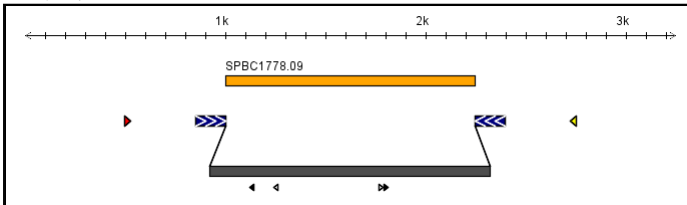

SPBC1778.10c

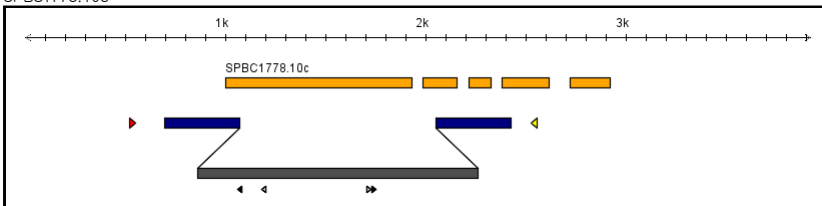

SPBC1815.01

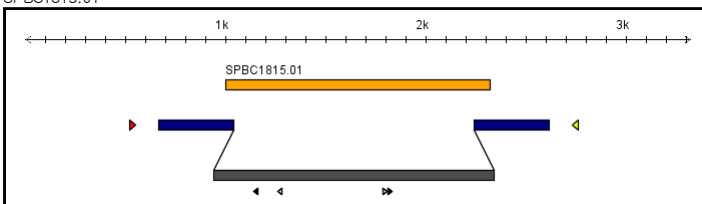

SPBC1861.01c

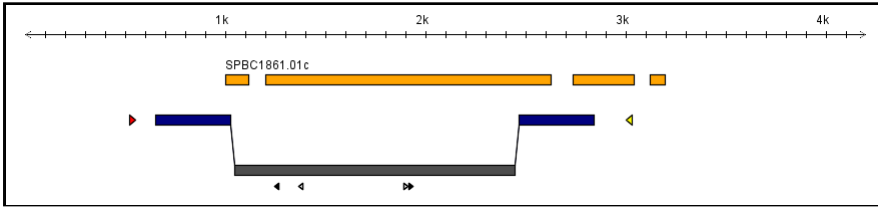

SPBC1861.02

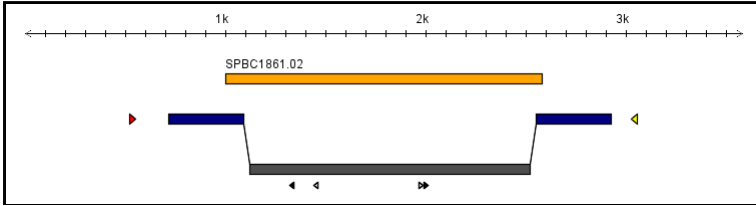

SPBC1861.06c

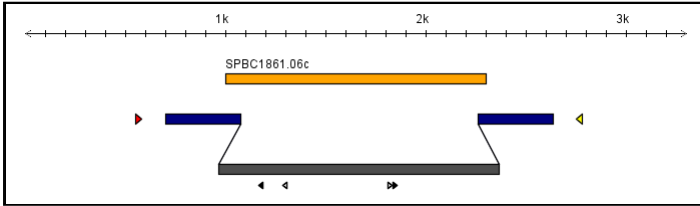

SPBC1861.08c

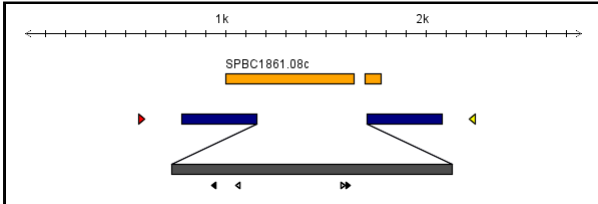

SPBC1861.09

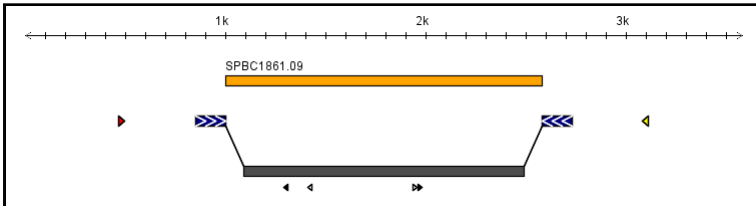

SPBC1921.02

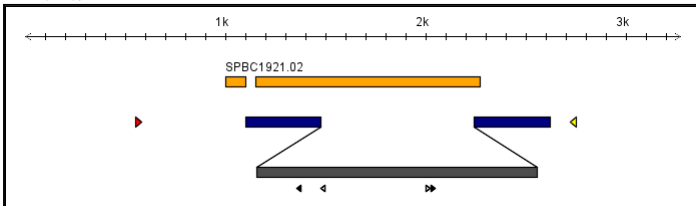

SPBC1921.03c

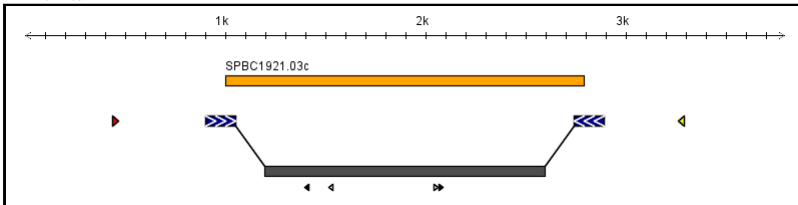

SPBC1921.04c

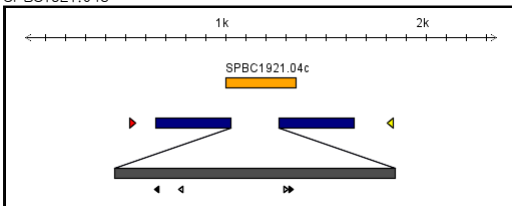

SPBC1921.06c

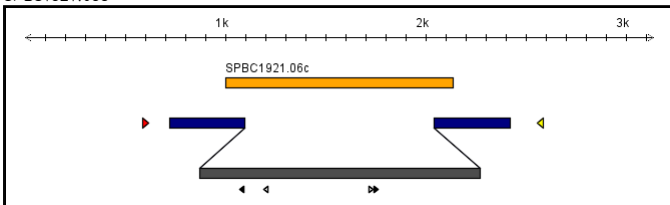

SPBC1921.07c

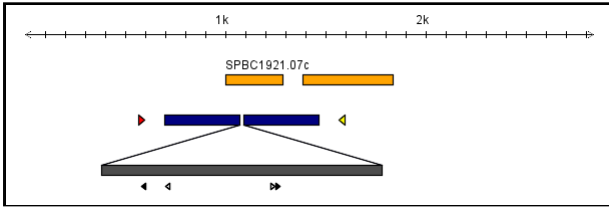

SPBC211.01

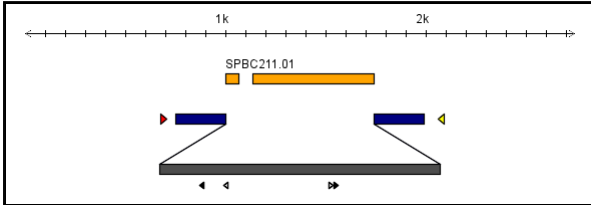

SPBC211.02c

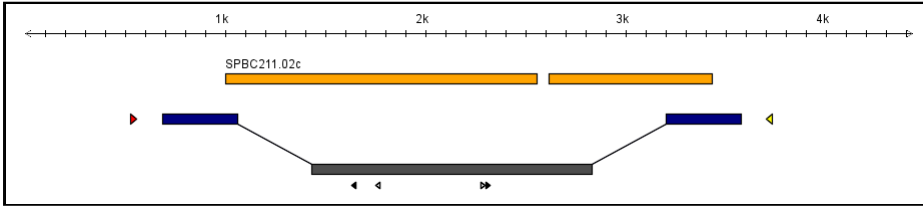

SPBC211.06

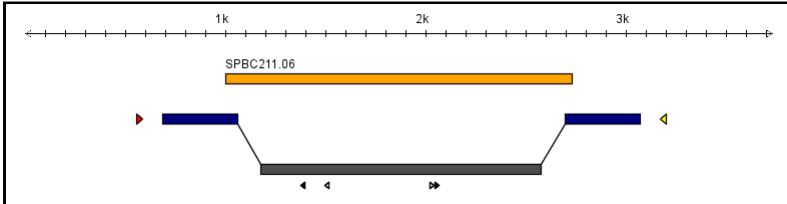

SPBC211.07c

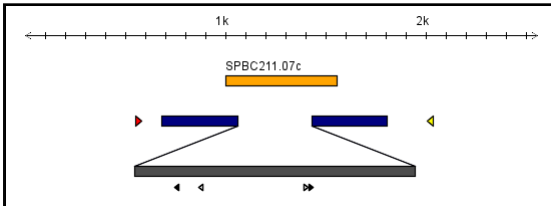

SPBC211.08c

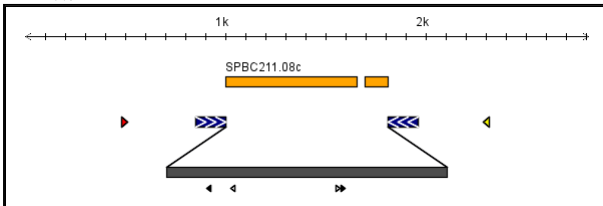

SPBC215.02

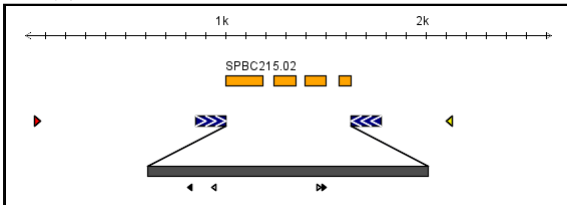

SPBC215.03c

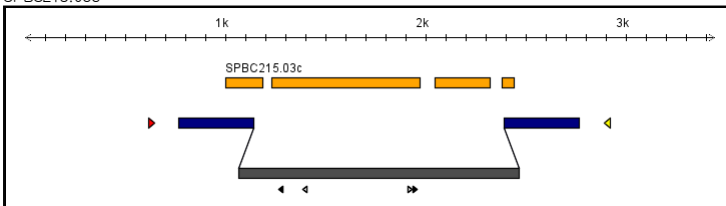

SPBC215.04

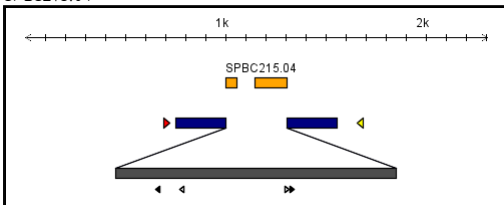

SPBC215.05

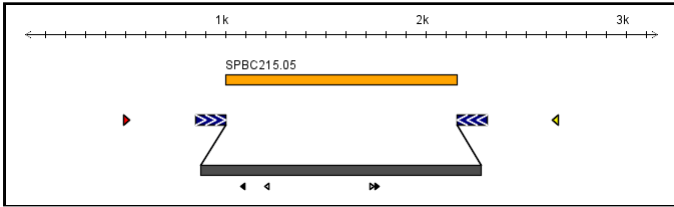

SPBC215.07c

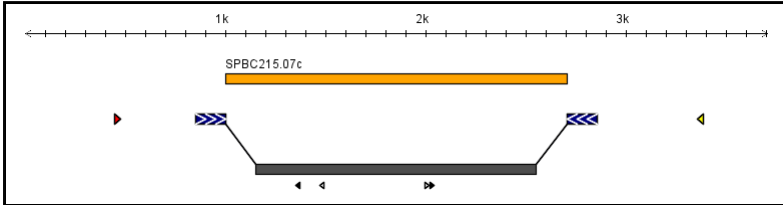

SPBC215.09c

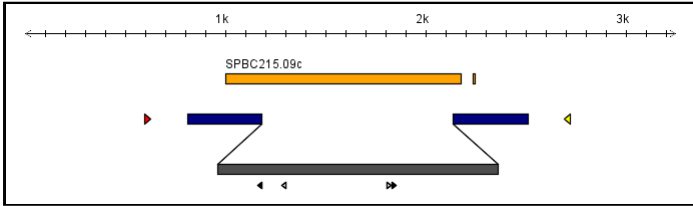

SPBC215.10

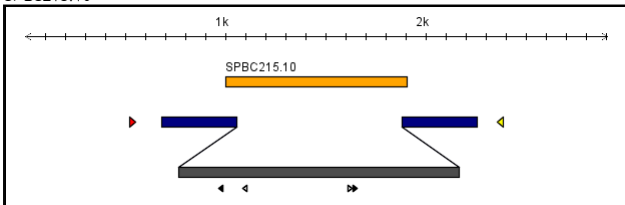

SPBC215.11c

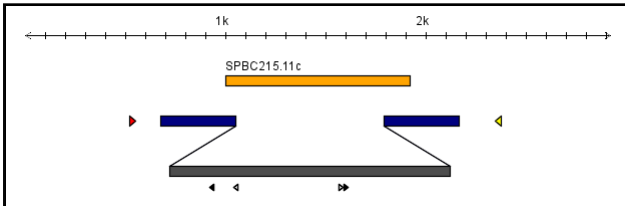

SPBC215.12

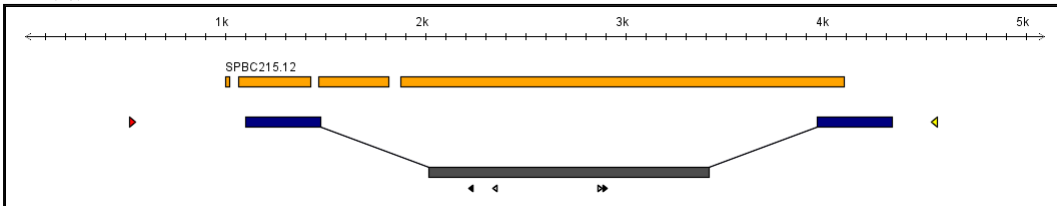

SPBC215.13

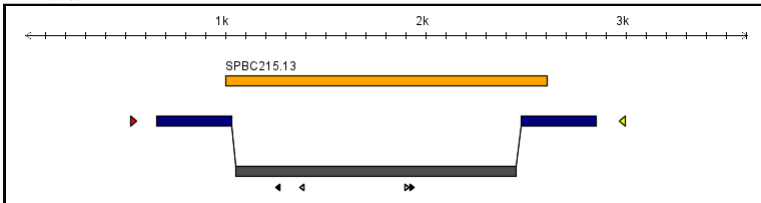

SPBC215.14c

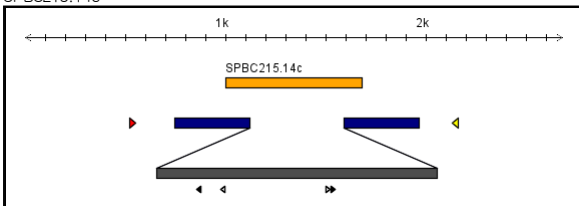

SPBC216.01c

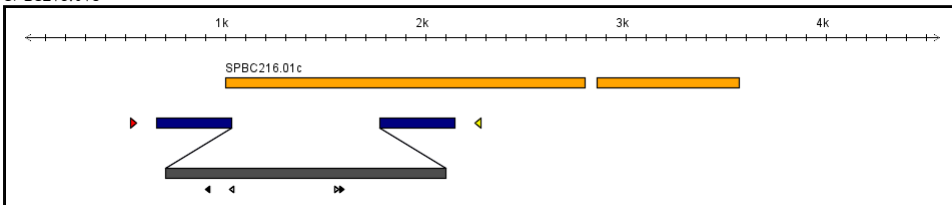



SPBC216.03

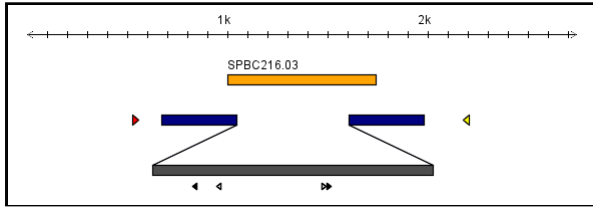

SPBC216.06c

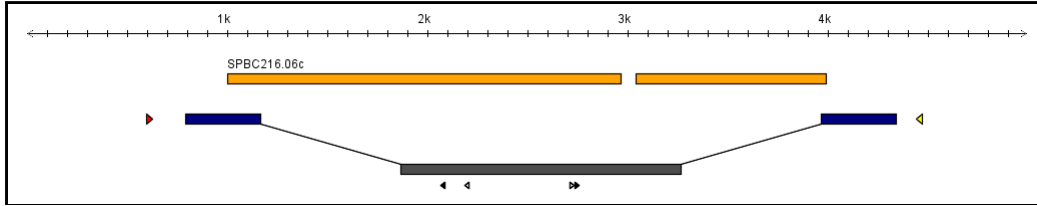

SPBC244.01c

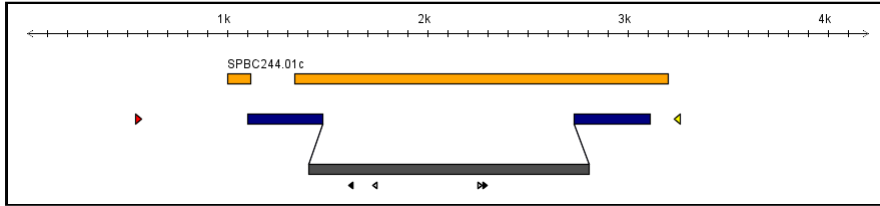

SPBC244.02c

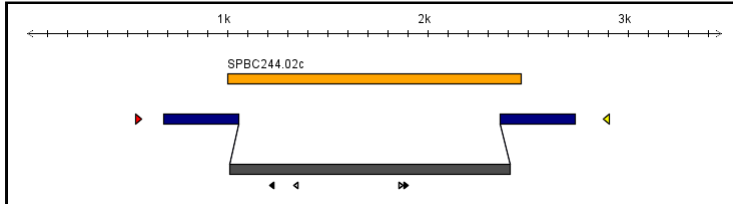

SPBC29A10.08

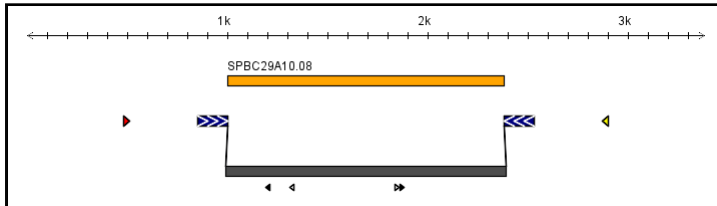

SPBC29A10.09c

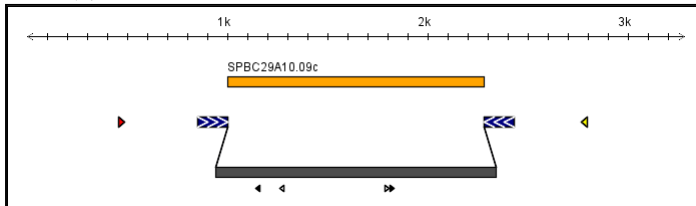

SPBC29A10.11c

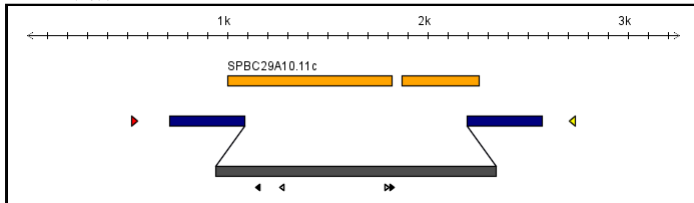

SPBC29A10.12

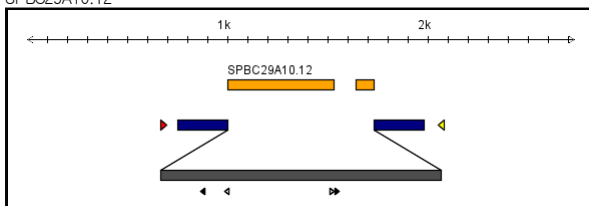

SPBC29A10.13

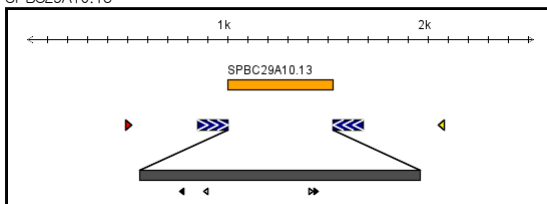

SPBC29A10.15

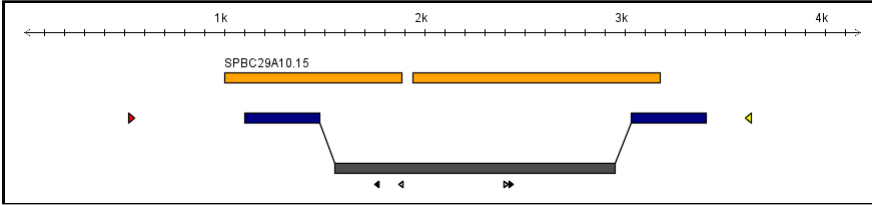

SPBC29A10.16c

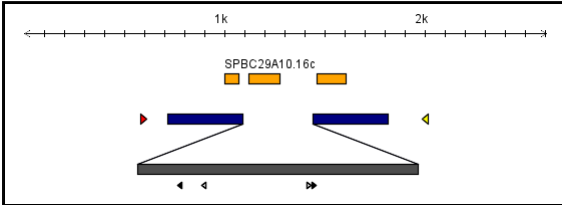

SPBC29B5.01

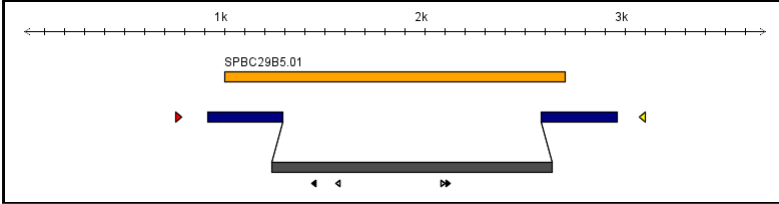

SPBC29B5.03c

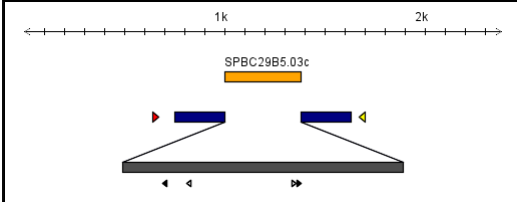

SPBC29B5.04c

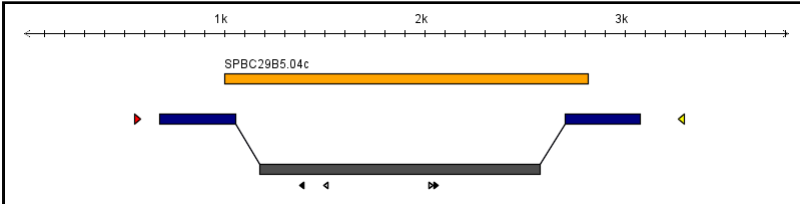

SPBC30B4.01c

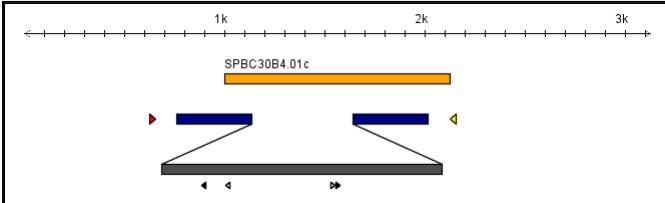

SPBC30B4.03c

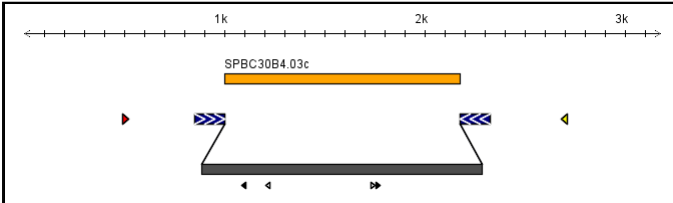

SPBC30B4.06c

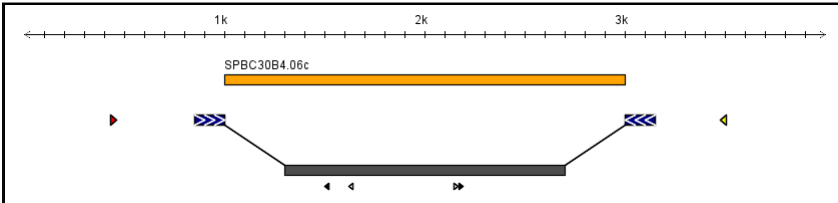

SPBC30B4.07c

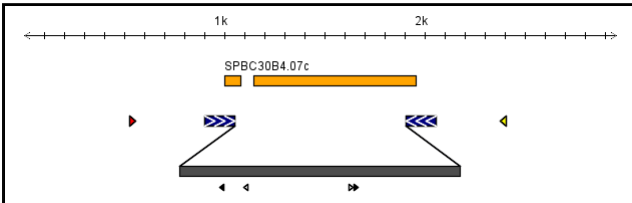

SPBC30B4.08

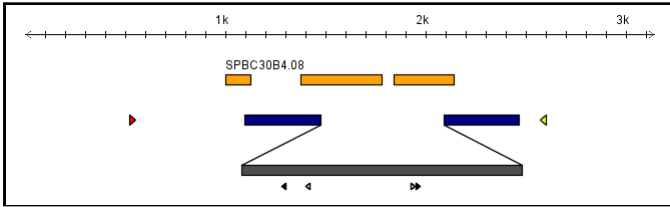

SPBC30D10.02

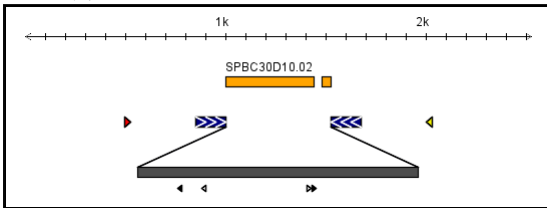

SPBC30D10.03c

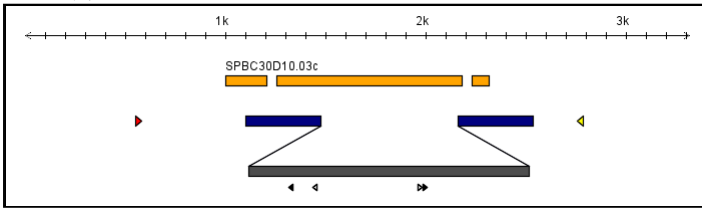

SPBC30D10.04

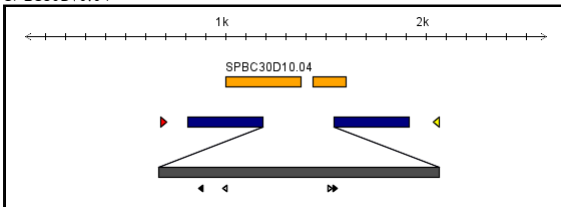

SPBC30D10.05c

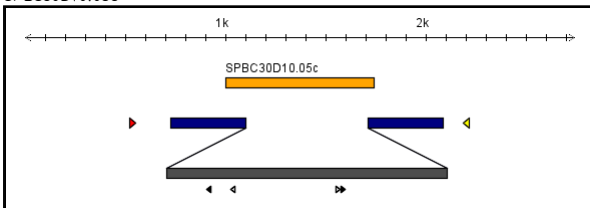

SPBC30D10.06

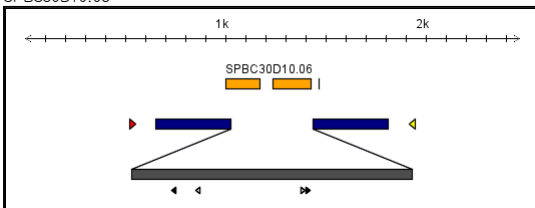

SPBC30D10.07c

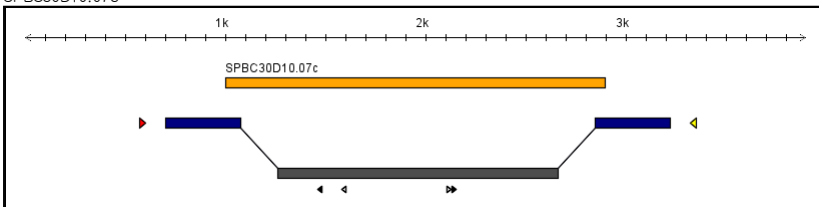

SPBC30D10.08

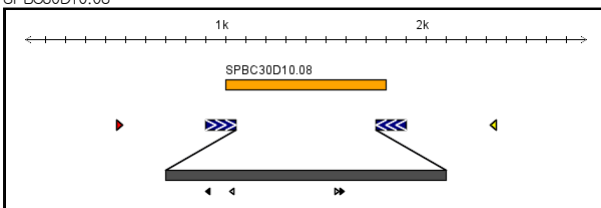

SPBC30D10.09c

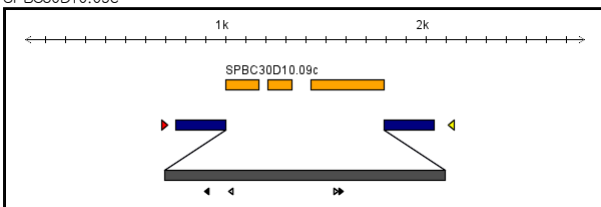

SPBC30D10.11

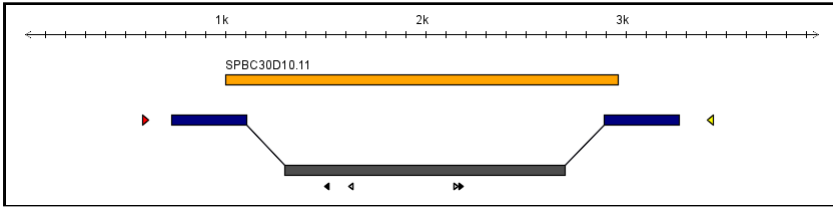

SPBC30D10.12c

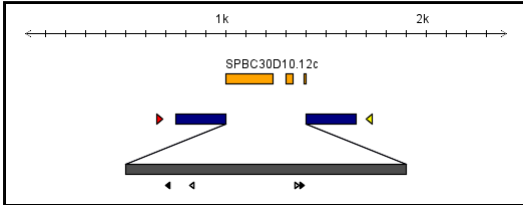

SPBC30D10.13c

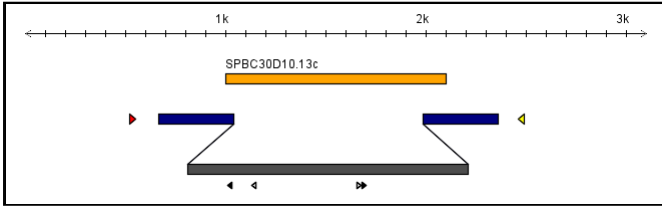

SPBC30D10.14

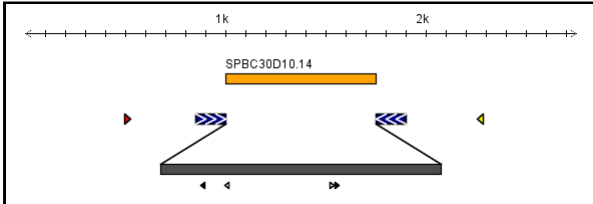

SPBC30D10.15

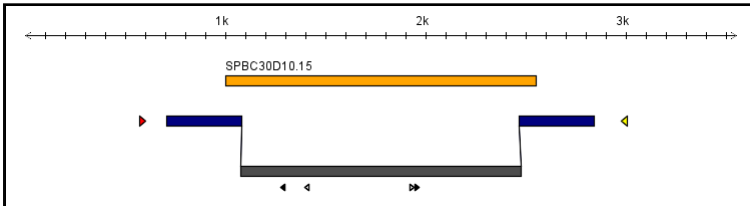

SPBC30D10.16

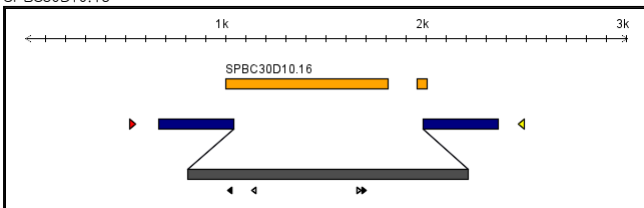

SPBC30D10.17c

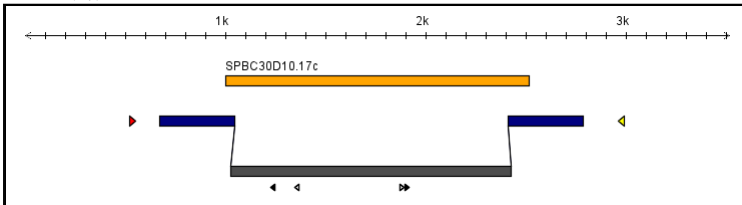

SPBC30D10.18c

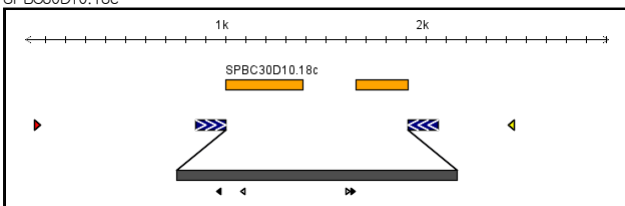

SPBC317.01

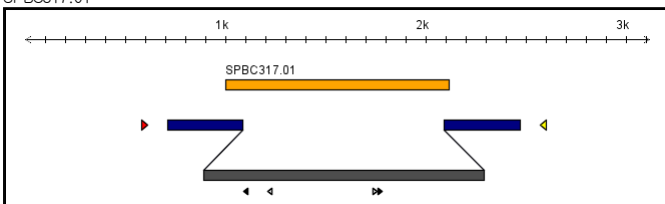

SPBC31A8.01c

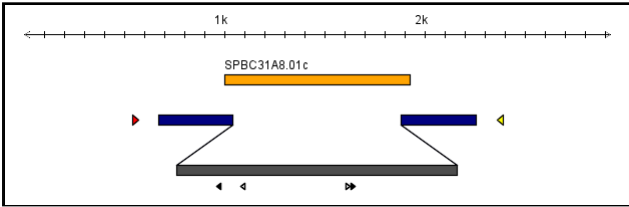

SPBC31E1.02c

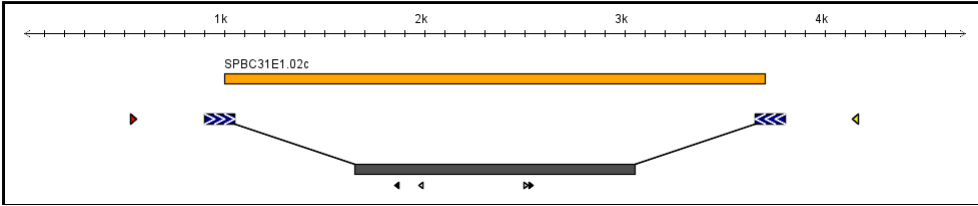

SPBC31E1.03

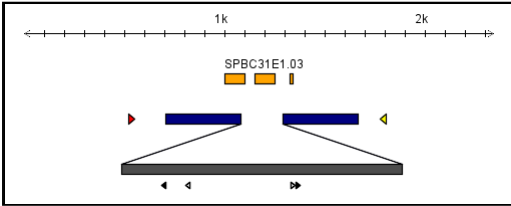

SPBC31E1.04

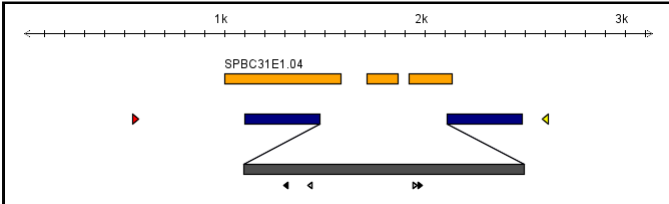

SPBC31E1.05

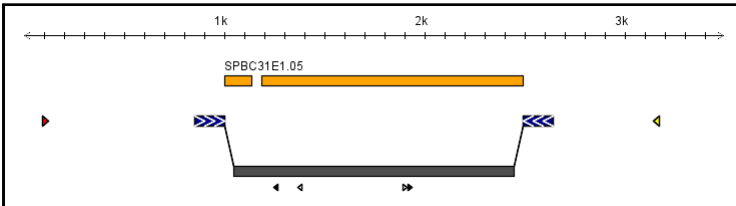

SPBC31F10.02

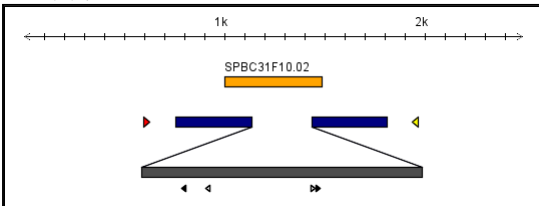

SPBC31F10.03

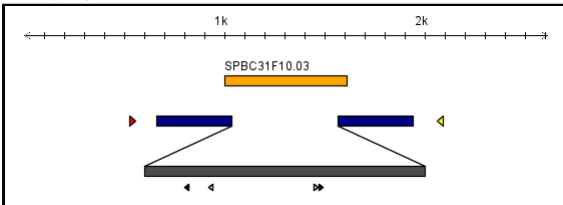

SPBC31F10.04c

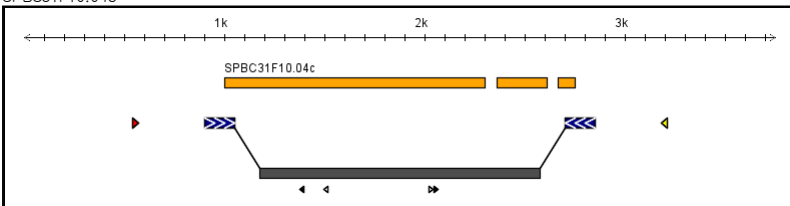

SPBC31F10.05

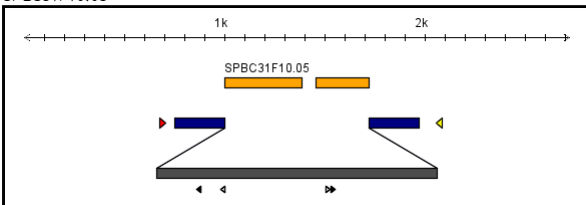

SPBC31F10.06c

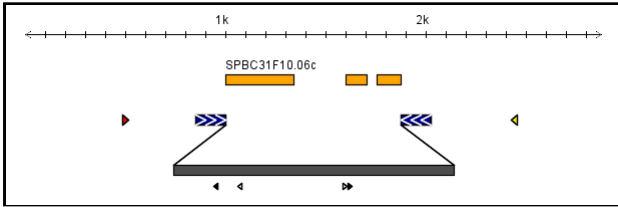

SPBC31F10.07

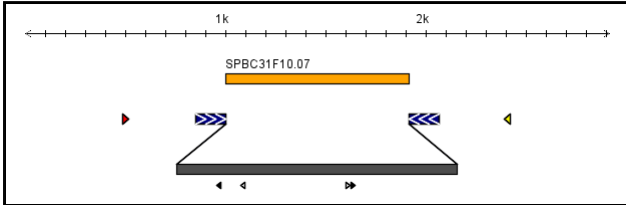

SPBC31F10.08

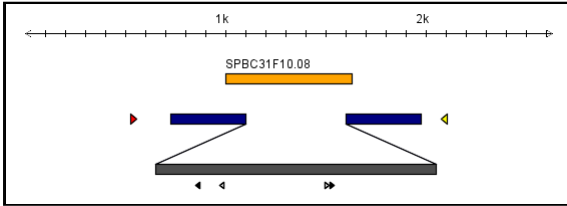

SPBC31F10.10c

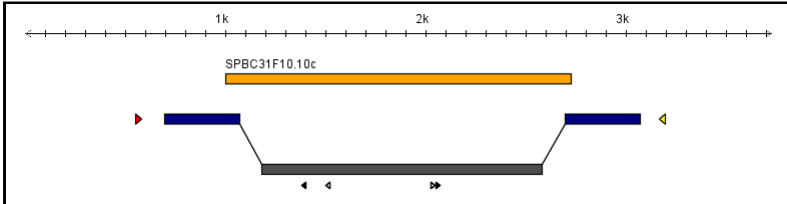

SPBC31F10.11c

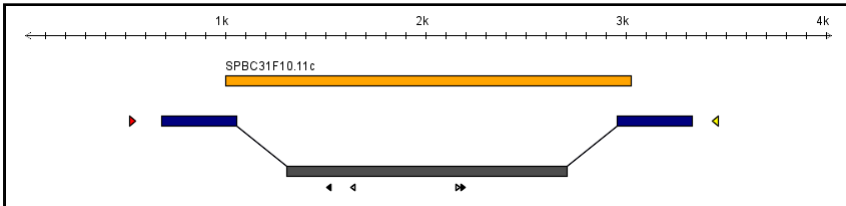

SPBC31F10.12

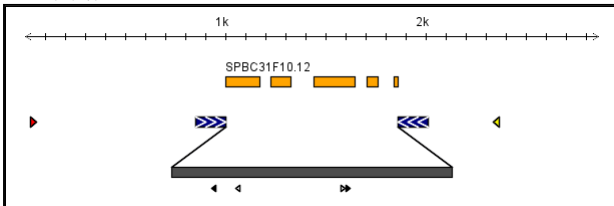

SPBC31F10.15c

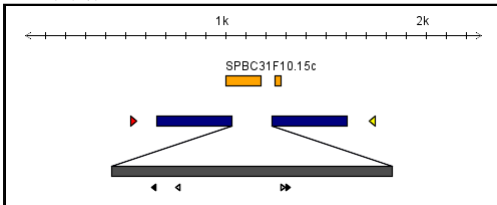

SPBC31F10.16

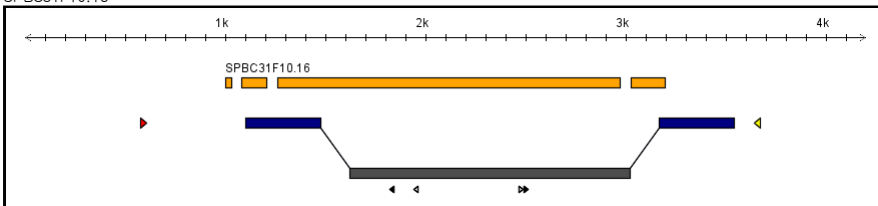

SPBC31F10.17c

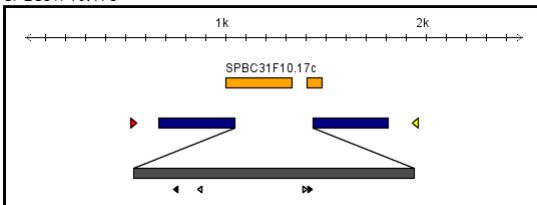

SPBC32C12.02

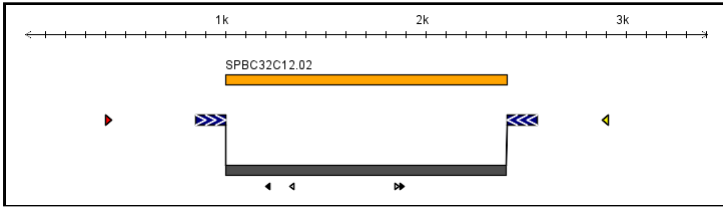

SPBC32C12.03c

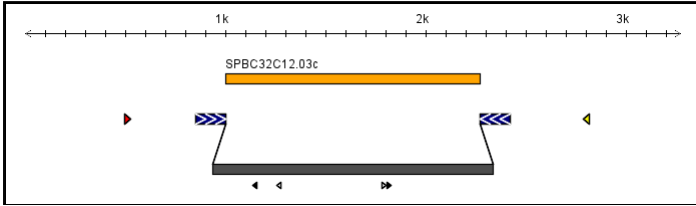

SPBC32F12.01c

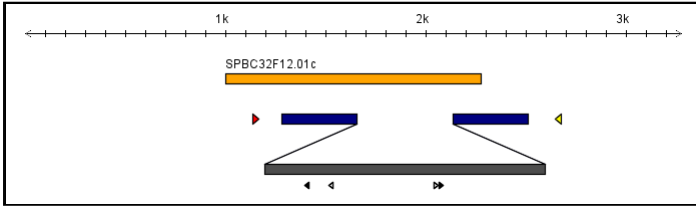

SPBC32F12.02

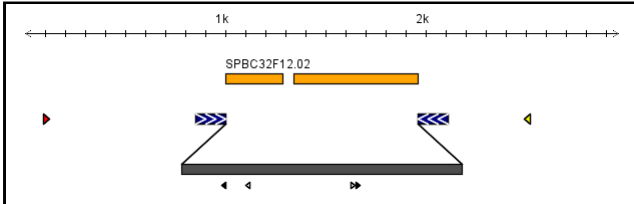

SPBC32F12.03c

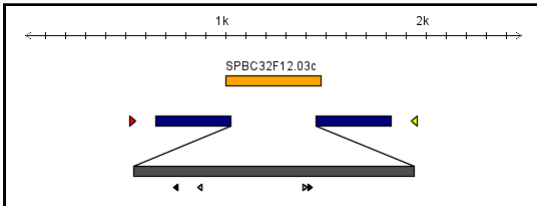

SPBC32F12.04

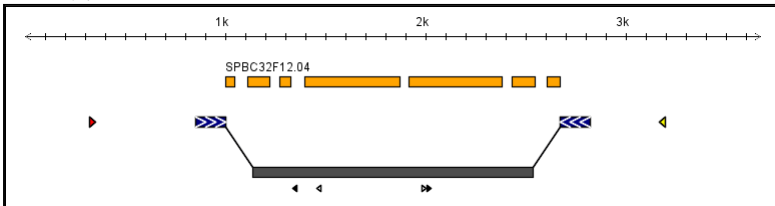

SPBC32F12.05c

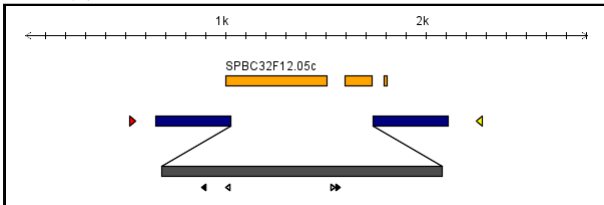

SPBC32F12.06

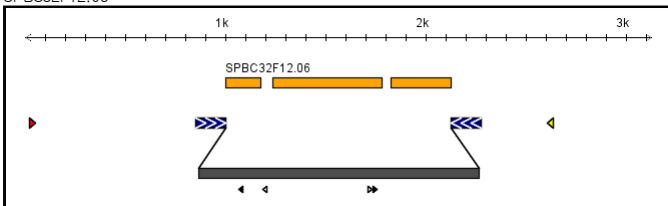

SPBC32F12.07c

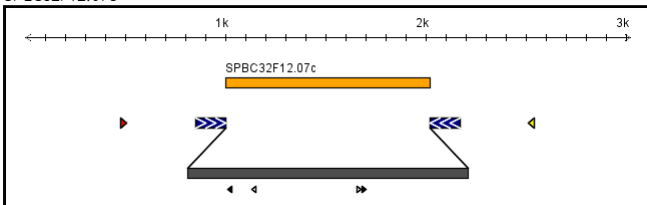

SPBC32F12.08c

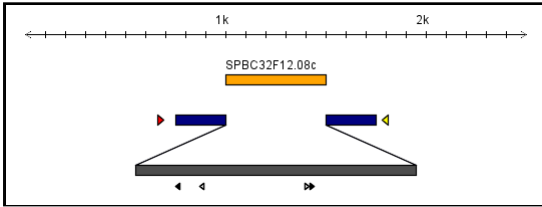

SPBC32F12.09

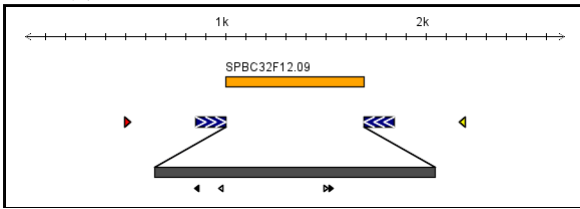

SPBC32F12.10

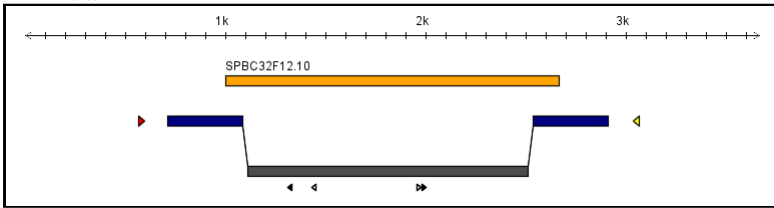

SPBC32F12.11

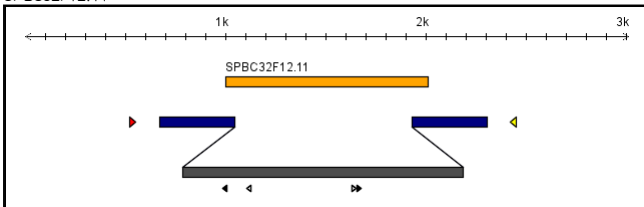

SPBC32F12.12c

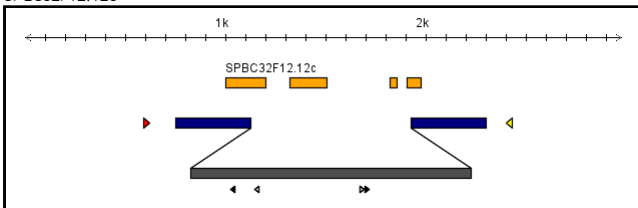

SPBC32H8.01c

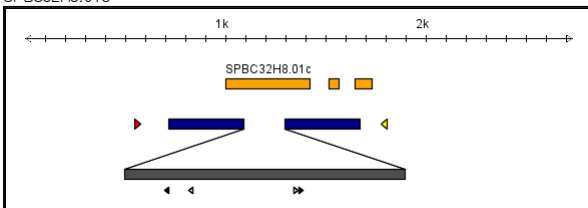

SPBC32H8.02c

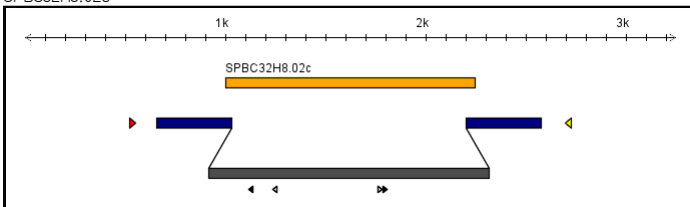

SPBC32H8.03

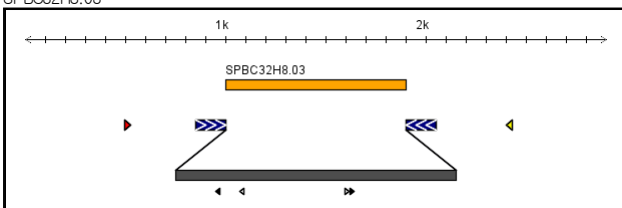

SPBC32H8.04c

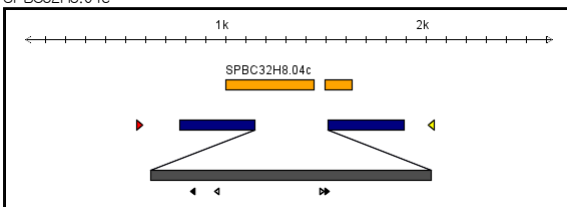



SPBC32H8.05

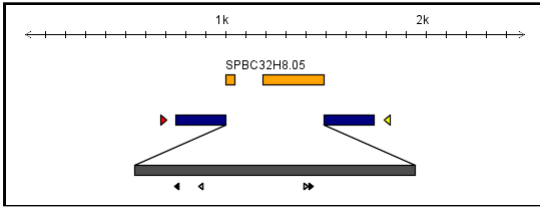

SPBC32H8.06

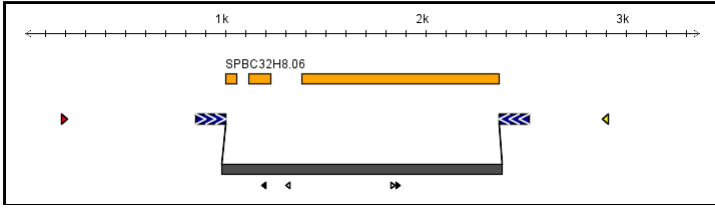

SPBC32H8.07

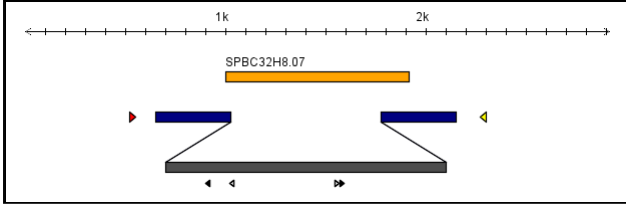

SPBC32H8.08c

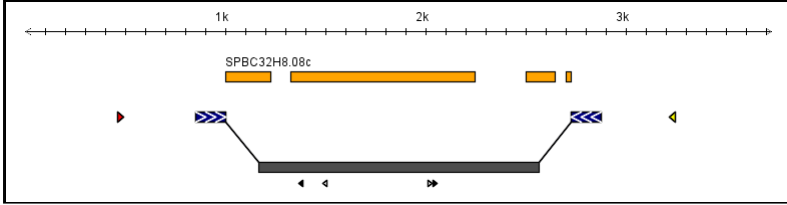

SPBC32H8.09

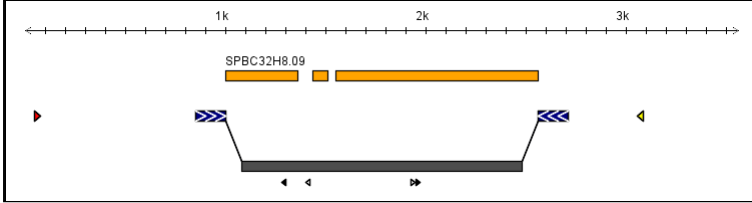

SPBC32H8.10

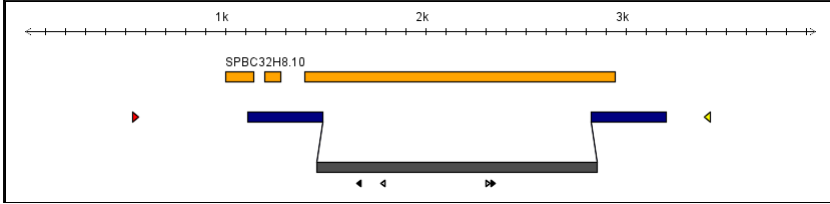

SPBC32H8.11

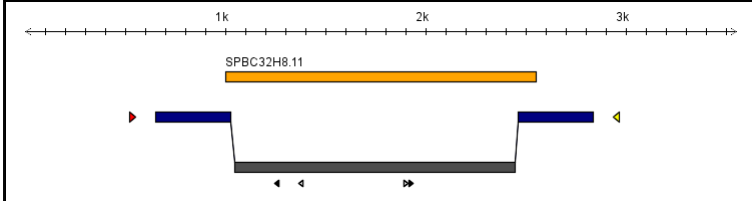

SPBC32H8.12c

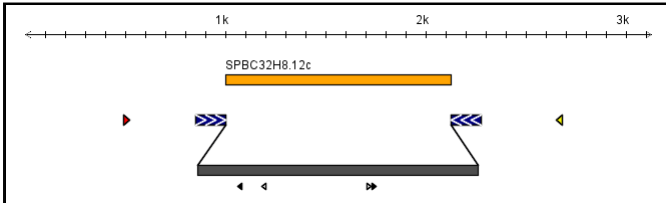

SPBC336.02

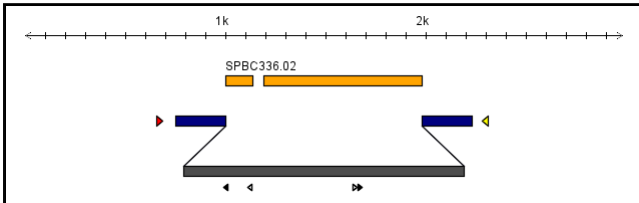

SPBC336.05c

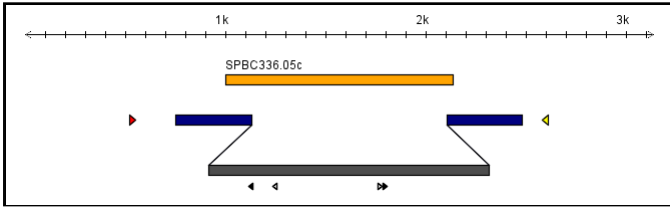

SPBC336.06c

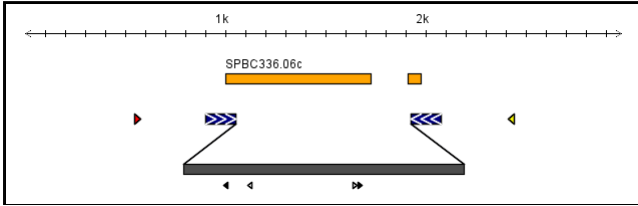

SPBC336.09c

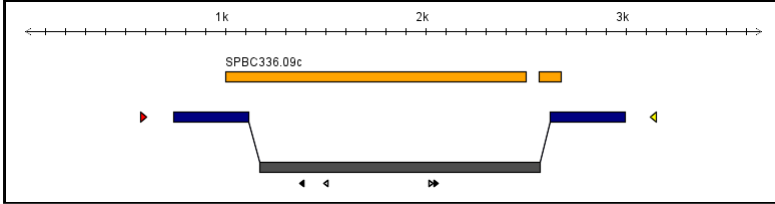

SPBC336.10c

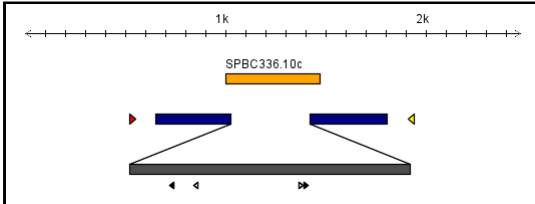

SPBC336.11

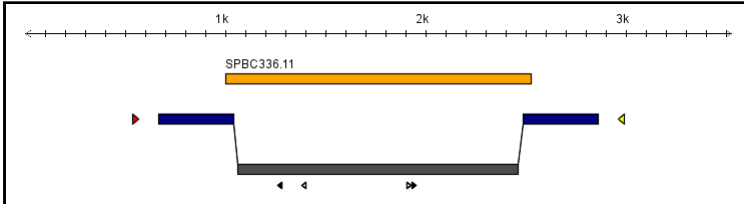

SPBC336.13c

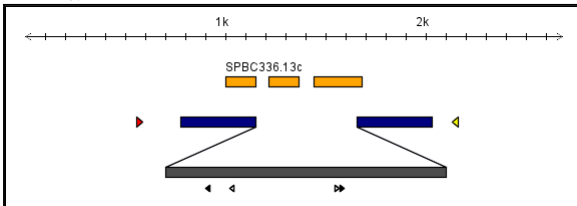

SPBC336.15

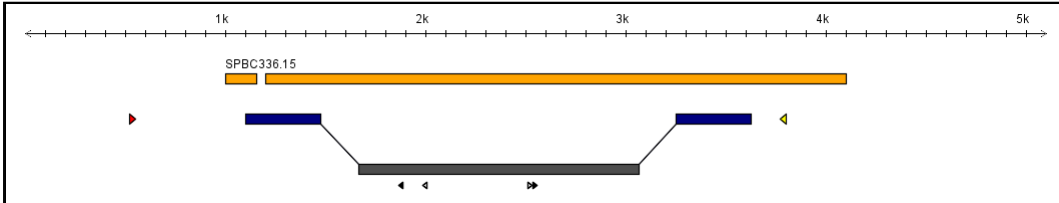

SPBC337.03

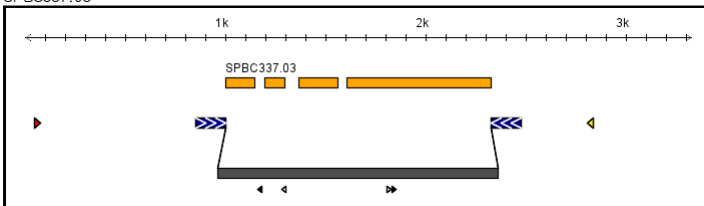

SPBC337.04

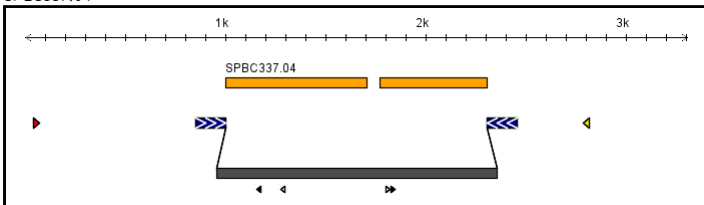

SPBC337.06c

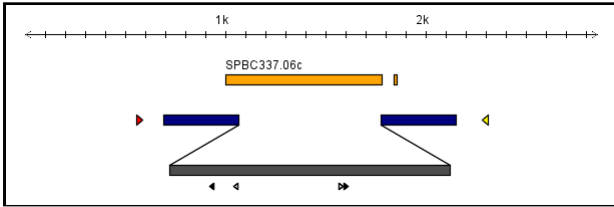

SPBC337.07c

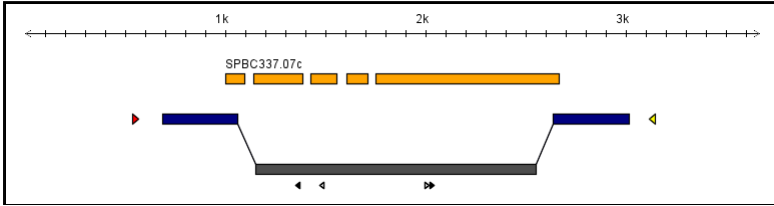

SPBC337.08c

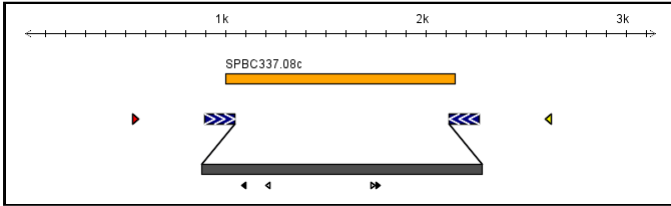

SPBC337.09

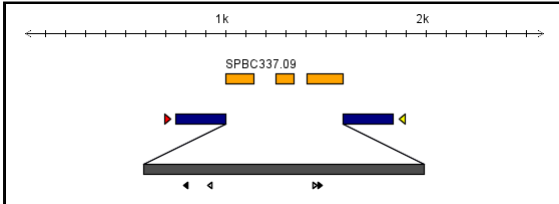

SPBC337.10c

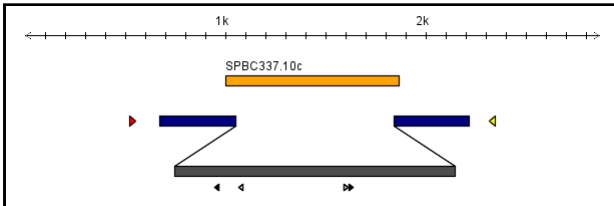

SPBC337.11

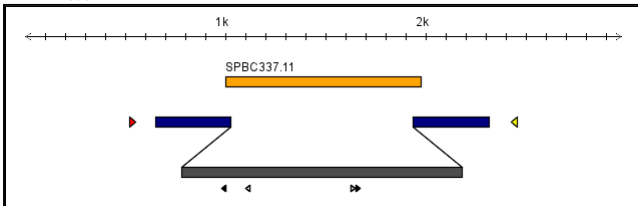

SPBC337.12

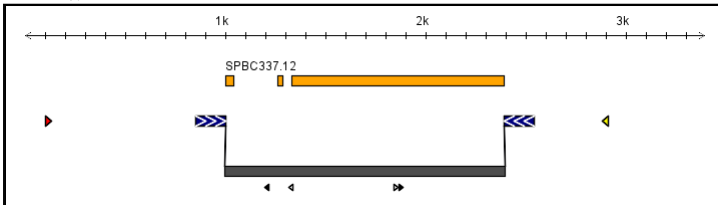

SPBC337.13c

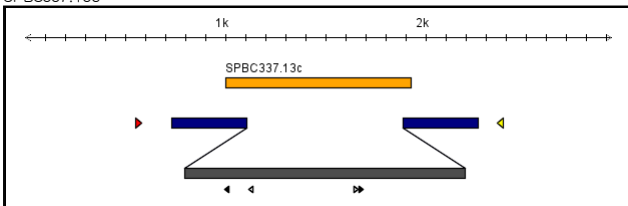

SPBC337.14

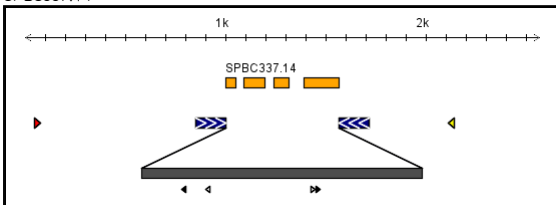

SPBC337.15c

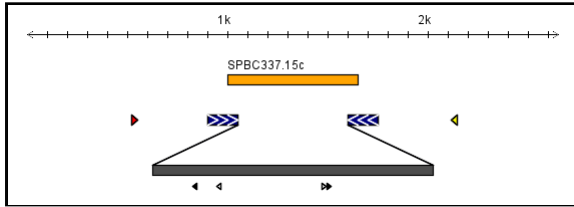

SPBC337.16

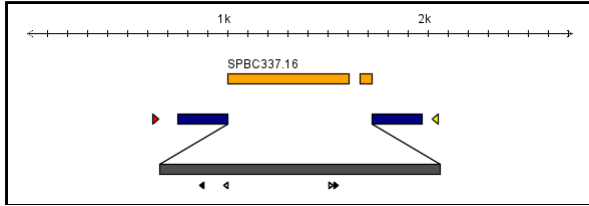

SPBC342.01c

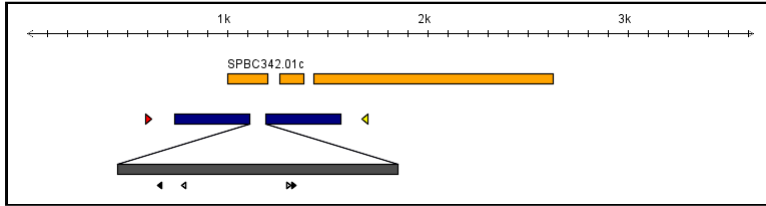

SPBC342.03

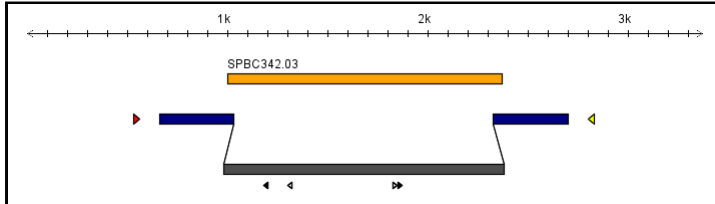

SPBC342.04

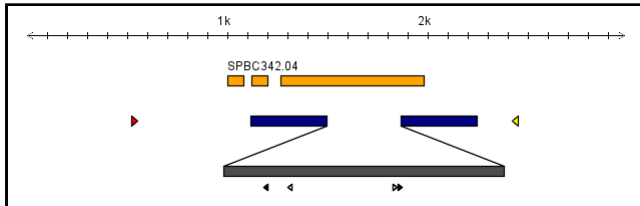

SPBC342.06c

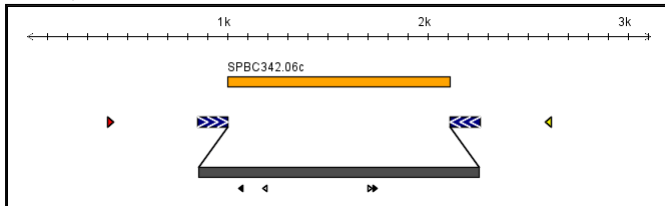

SPBC354.01

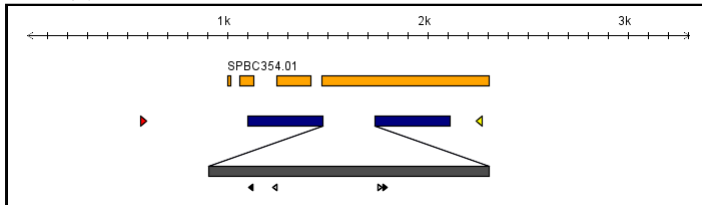

SPBC354.02c

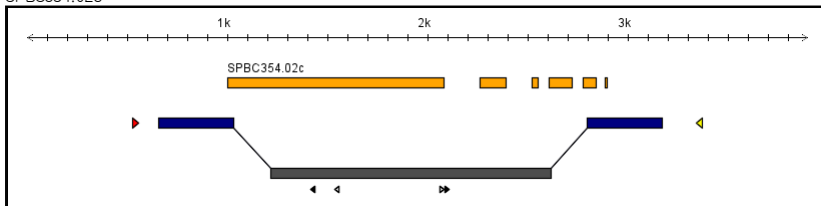

SPBC354.03

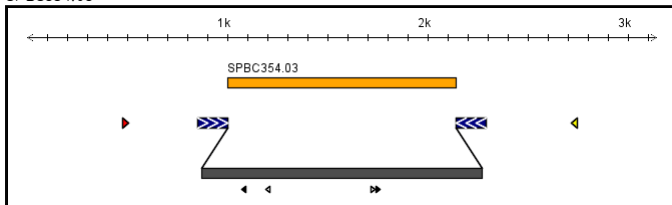

SPBC354.04

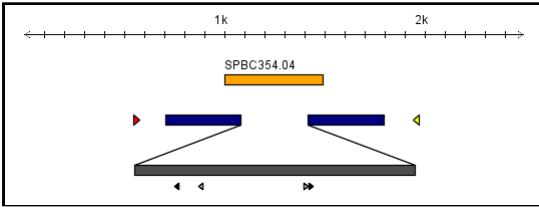

SPBC354.05c

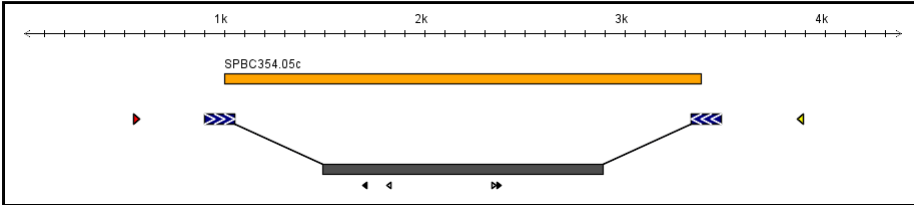

SPBC354.06

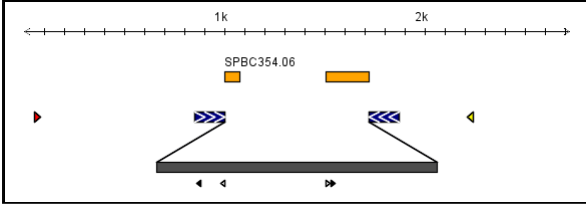

SPBC354.07c

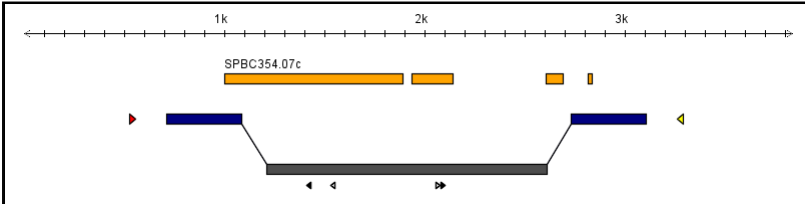

SPBC354.09c

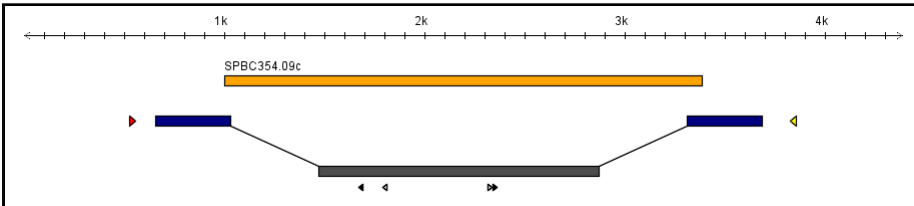

SPBC354.12

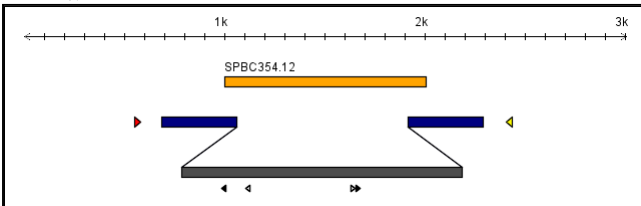

SPBC354.13

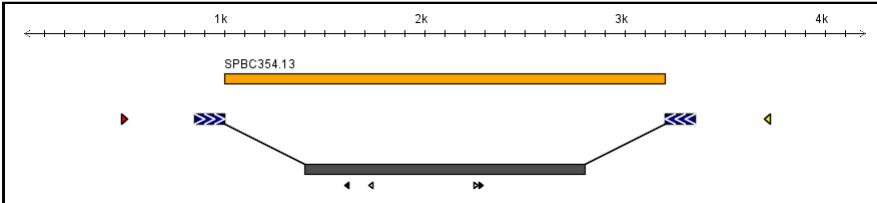

SPBC354.14c

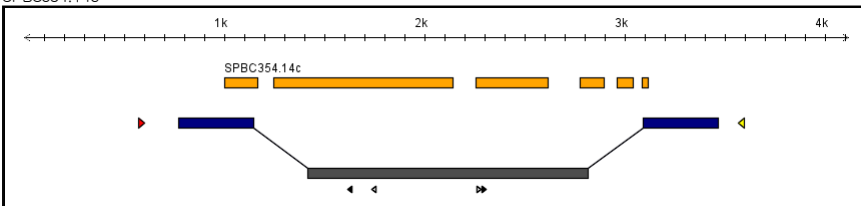

SPBC354.15

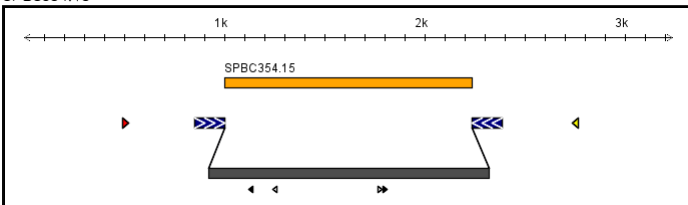

SPBC359.01

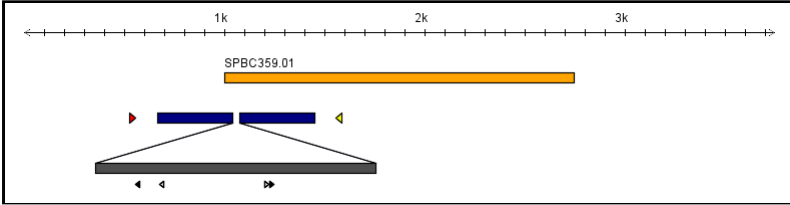

SPBC359.02

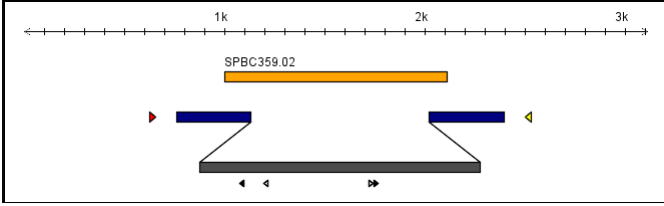

SPBC359.03c

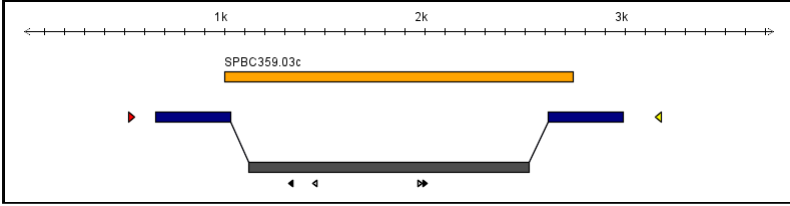

SPBC359.04c

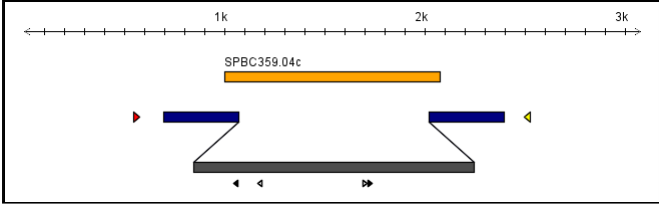

SPBC359.06

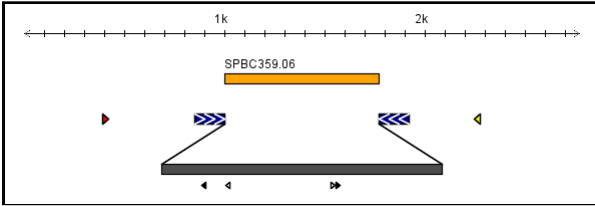

SPBC36.01c

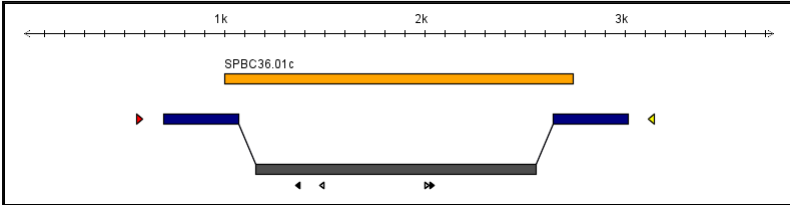

SPBC36.02c

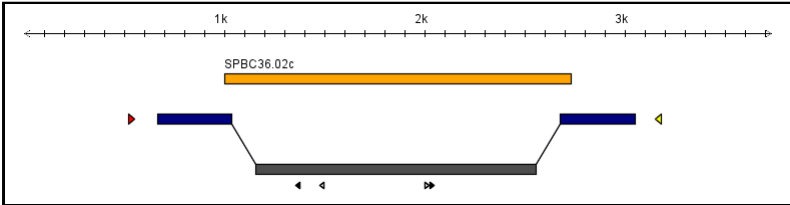

SPBC36.03c

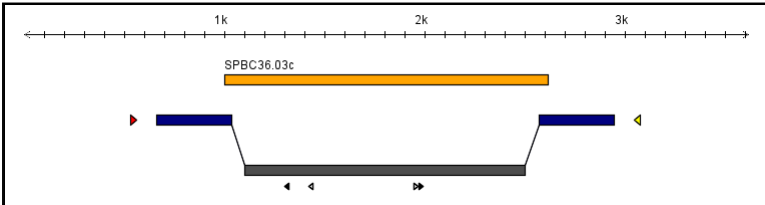

SPBC36.04

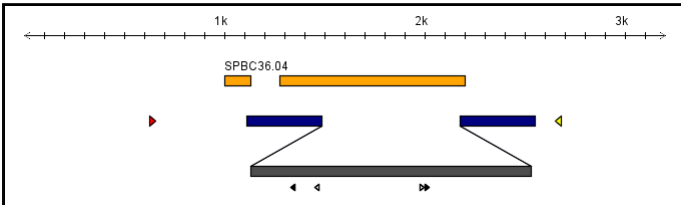

SPBC36.05c

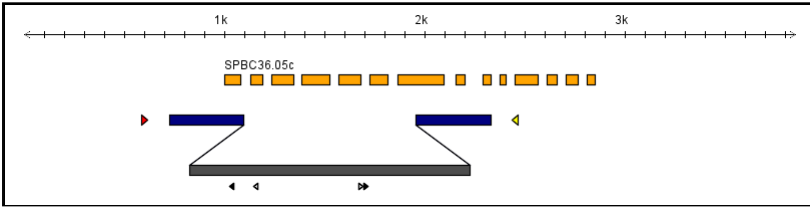

SPBC36.06c

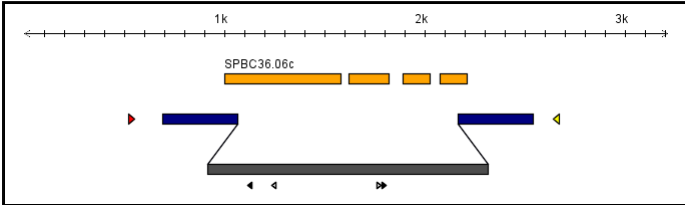

SPBC36.08c

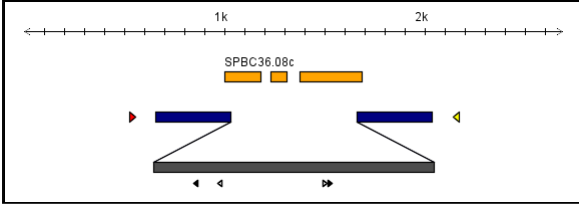

SPBC36.09

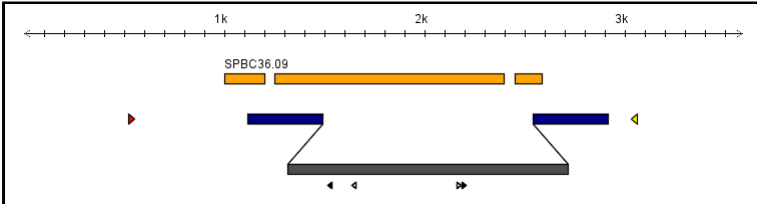

SPBC36.10

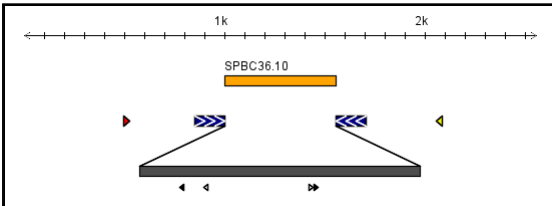

SPBC36.11

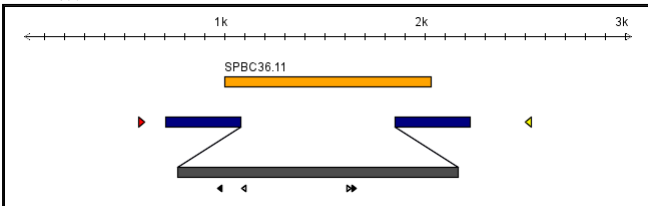

SPBC36.12c

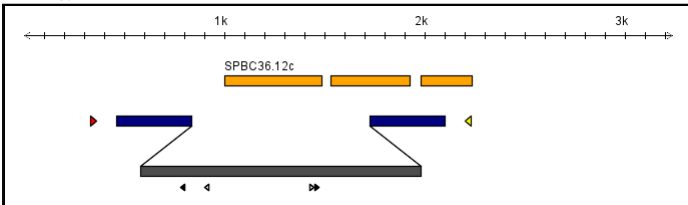

SPBC365.01

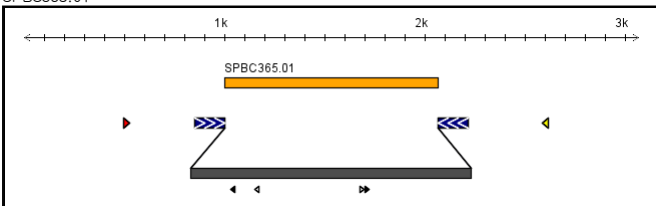

SPBC365.02c

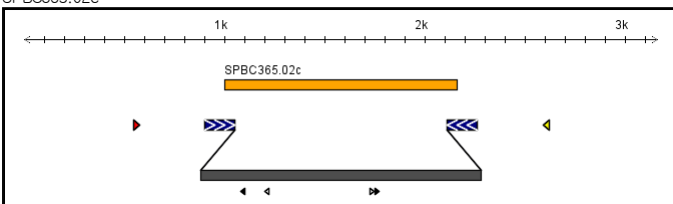

SPBC365.03c

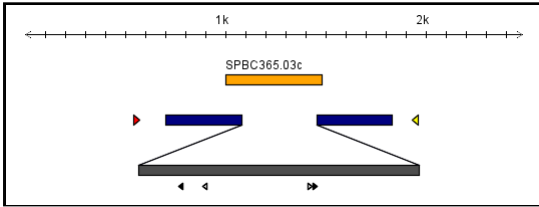

SPBC365.04c

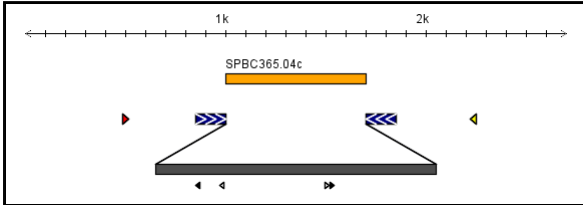

SPBC365.06

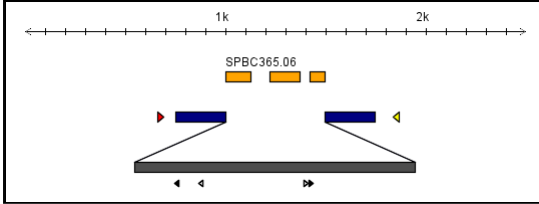

SPBC365.07c

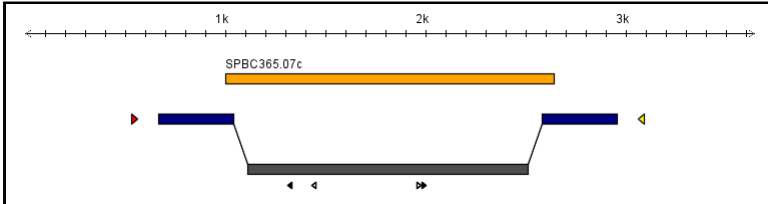

SPBC365.08c

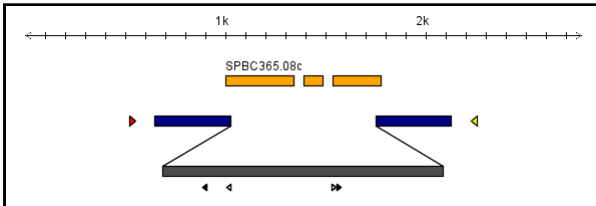

SPBC365.09c

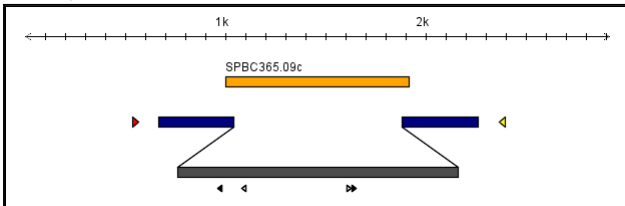

SPBC365.11

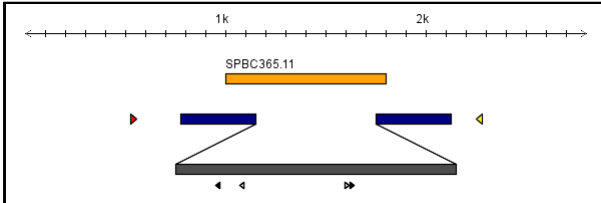

SPBC365.12c

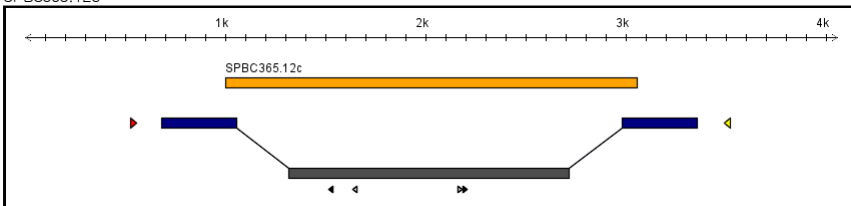

SPBC365.13c

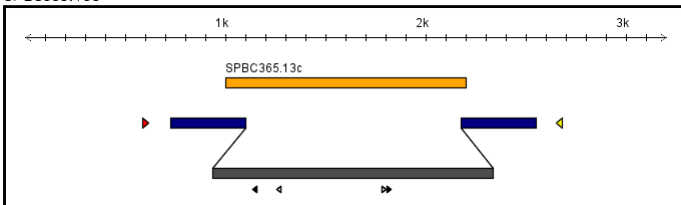



SPBC365.14c

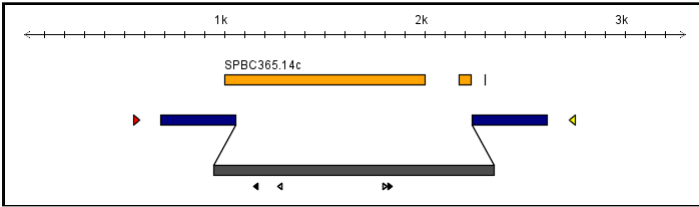

SPBC365.16

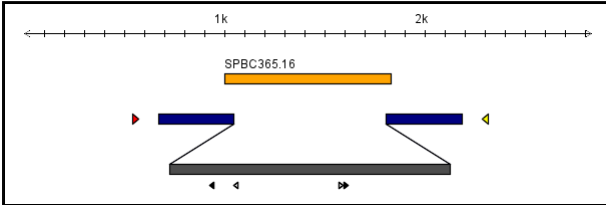

SPBC36B7.02

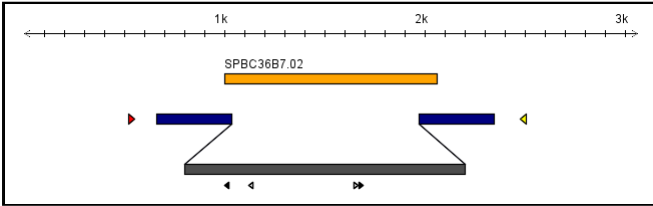

SPBC36B7.04

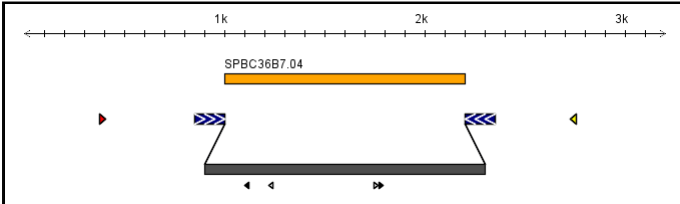

SPBC36B7.05c

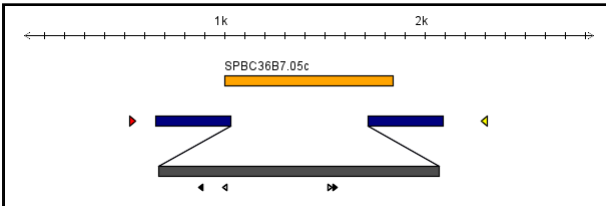

SPBC36B7.06c

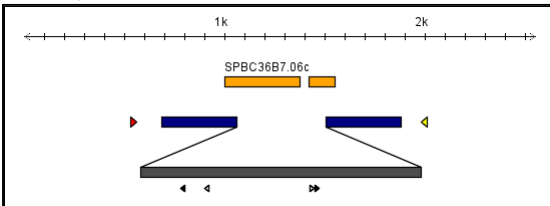

SPBC36B7.07

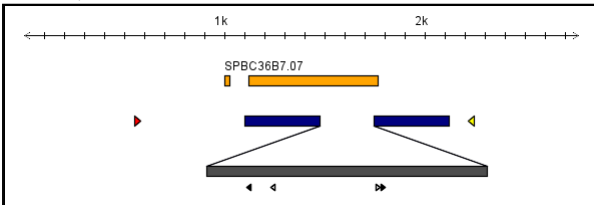

SPBC36B7.08c

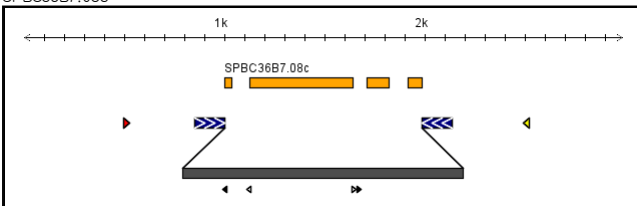

SPBC405.02c

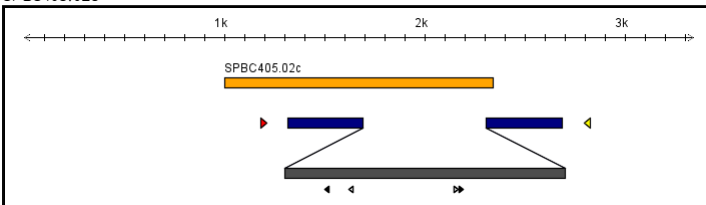

SPBC405.03c

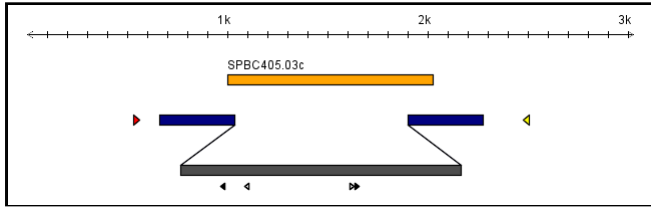

SPBC405.04c

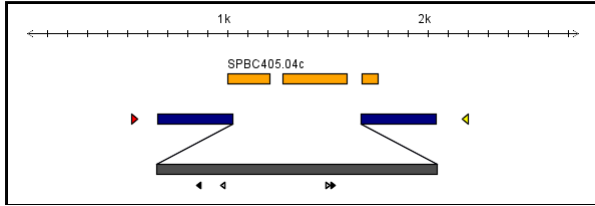

SPBC405.05

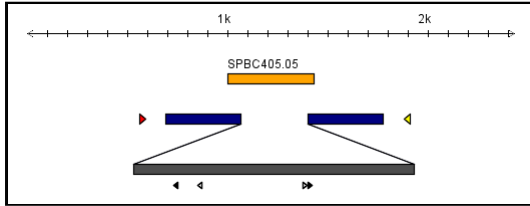

SPBC405.06

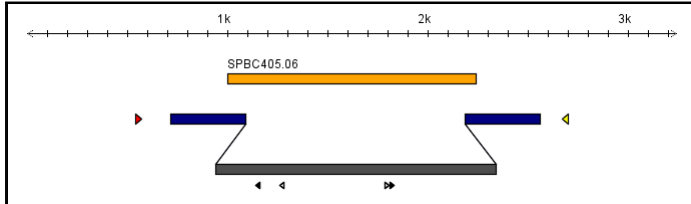

SPBC409.04c

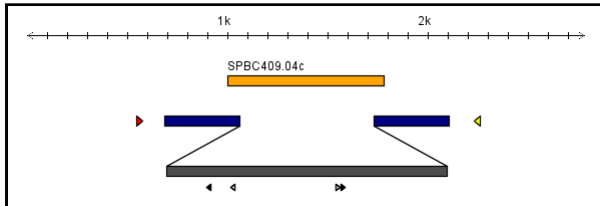

SPBC409.05

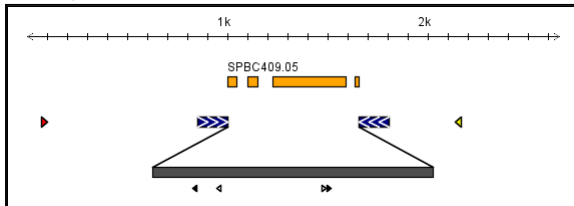

SPBC409.06

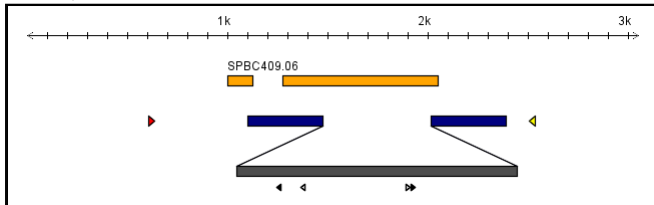

SPBC409.07c

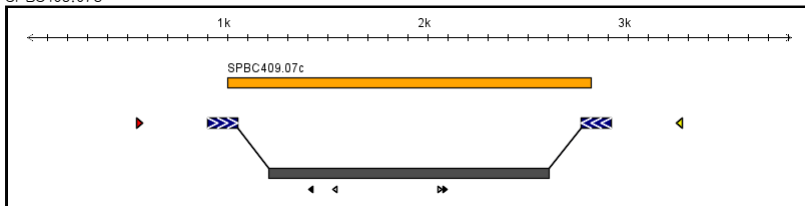

SPBC409.08

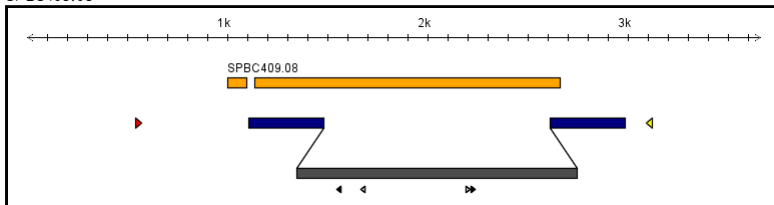

SPBC409.09c

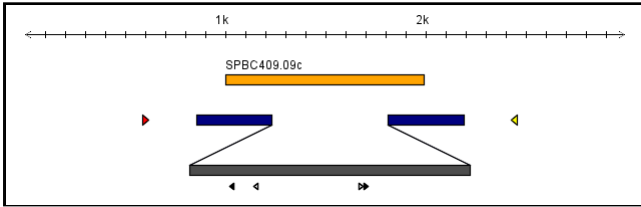

SPBC409.10

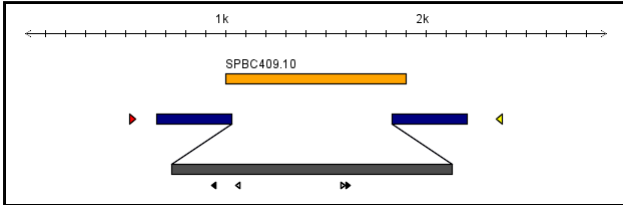

SPBC409.11

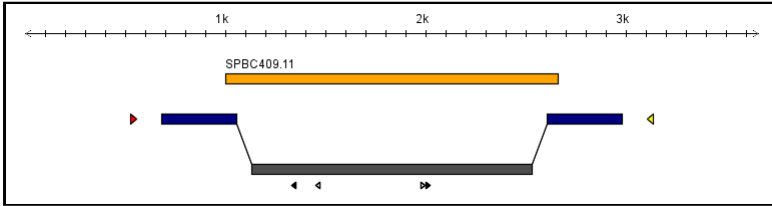

SPBC409.12c

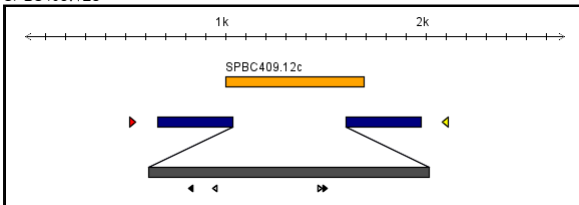

SPBC409.13

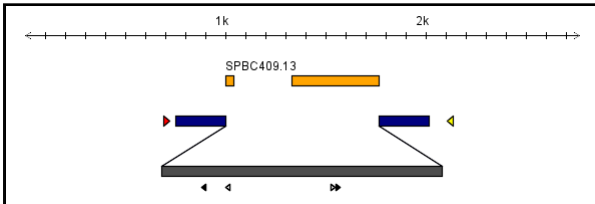

SPBC409.15

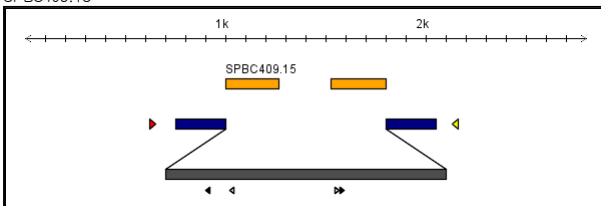

SPBC409.17c

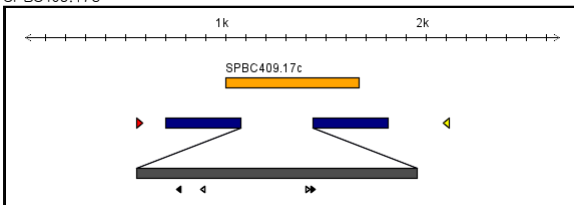

SPBC409.18

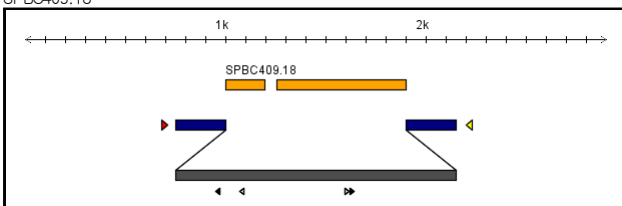

SPBC409.19c

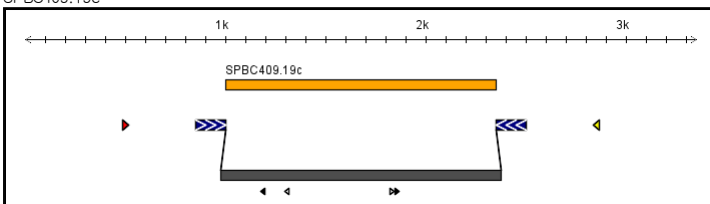

SPBC409.20c

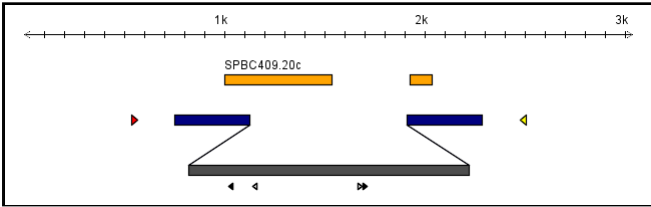

SPBC409.21

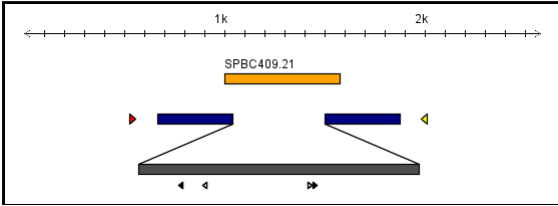

SPBC418.02

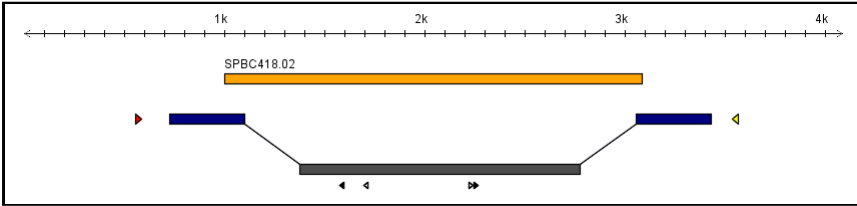

SPBC428.02c

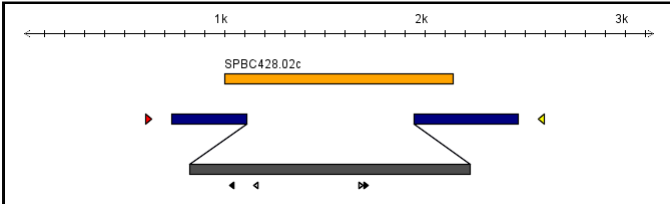

SPBC428.03c

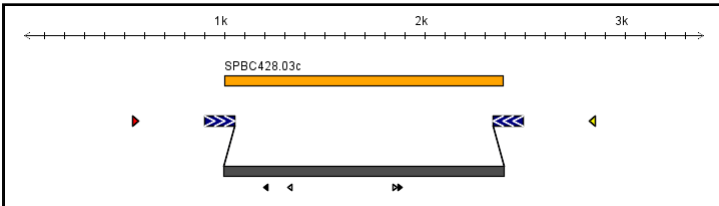

SPBC428.05c

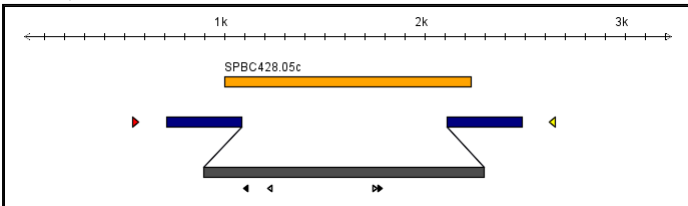

SPBC428.06c

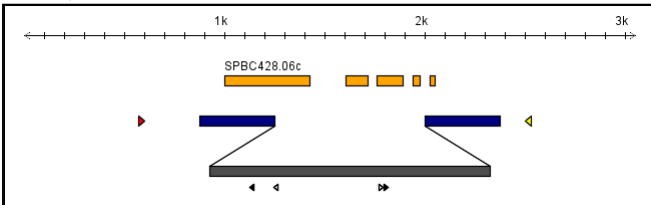

SPBC428.07

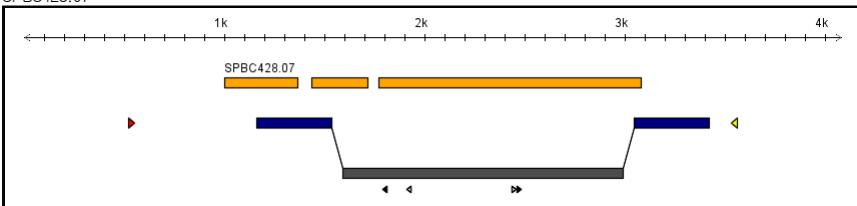

SPBC428.08c

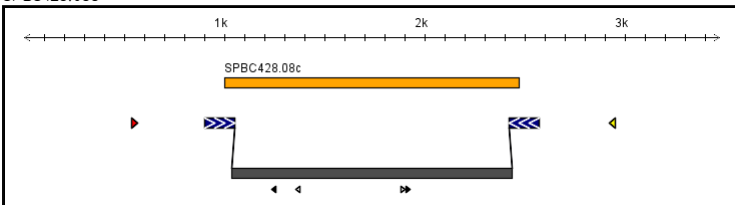

SPBC428.11

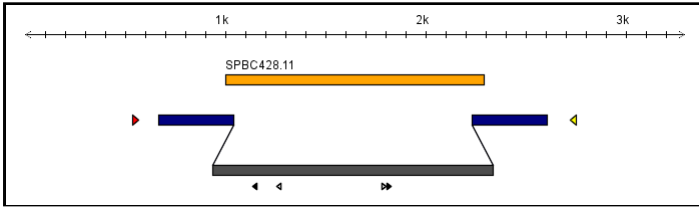

SPBC428.12c

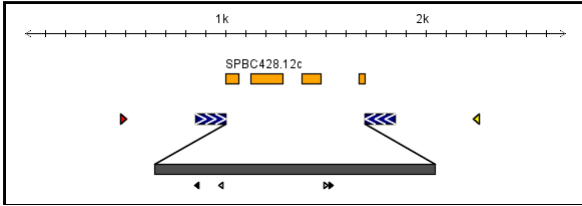

SPBC428.13c

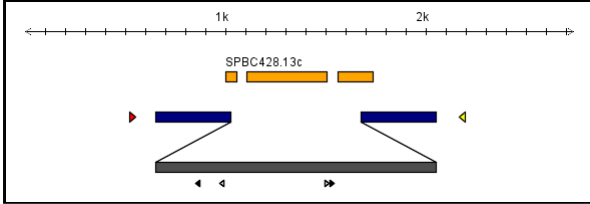

SPBC428.14

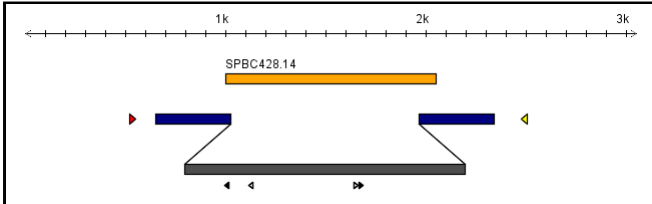

SPBC428.15

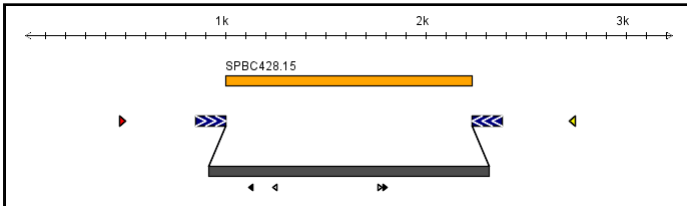

SPBC428.16c

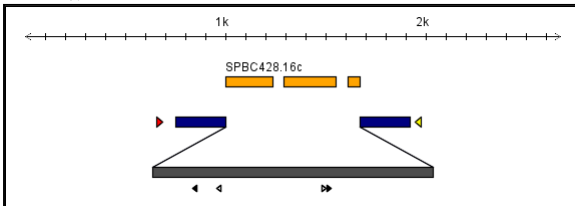

SPBC428.17c

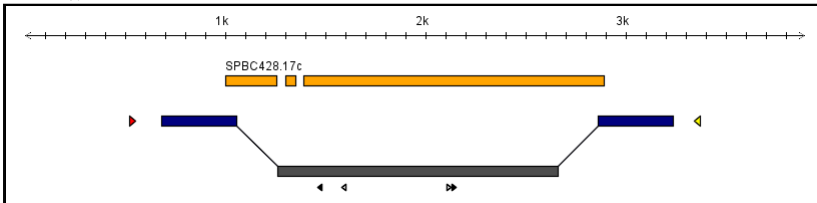

SPBC428.18

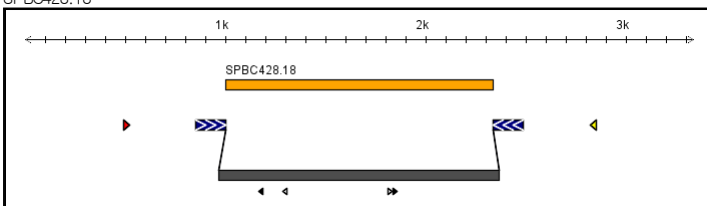

SPBC428.19c

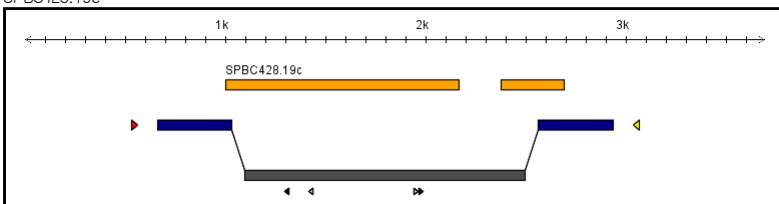

SPBC428.20c

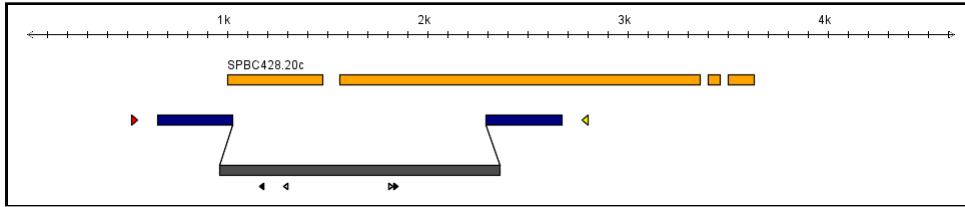

SPBC530.01

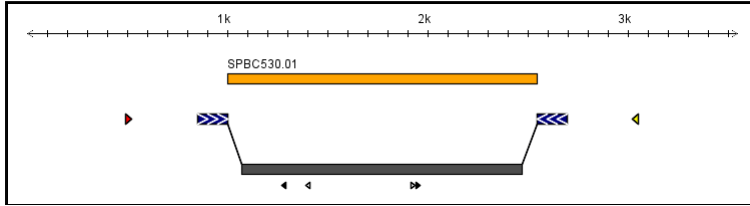

SPBC530.02

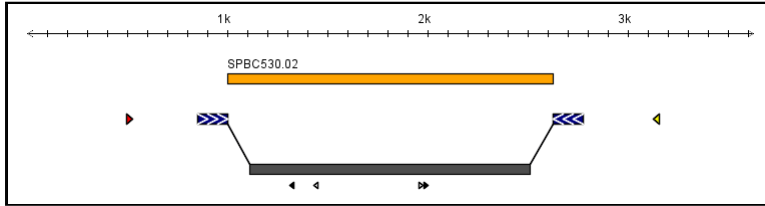

SPBC530.03c

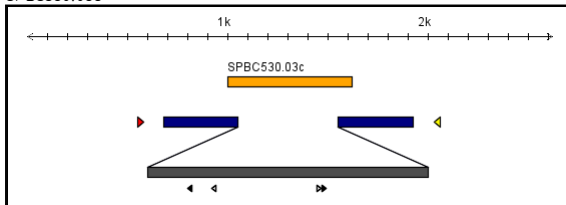

SPBC530.04

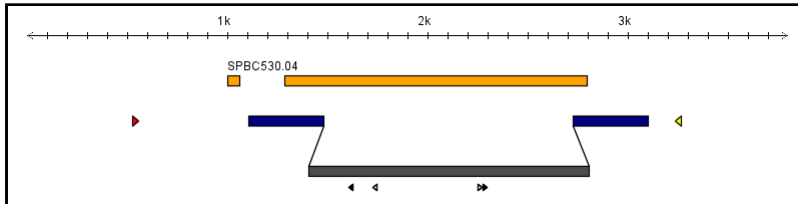

SPBC530.05

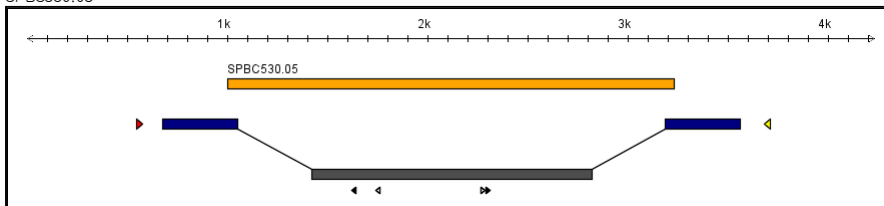

SPBC530.07c

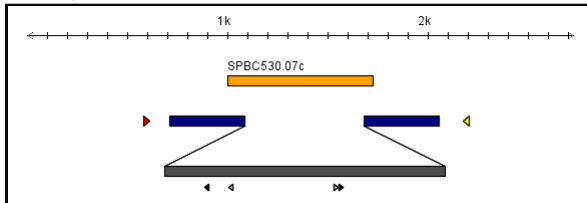

SPBC530.09c

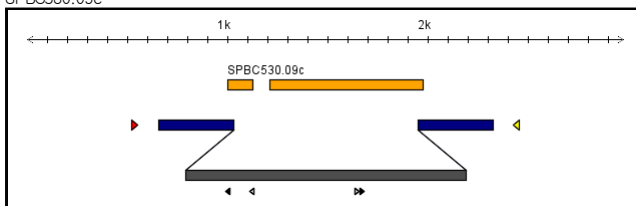

SPBC530.10c

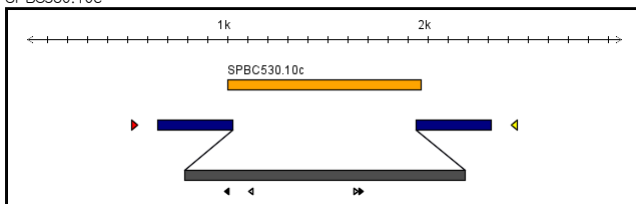

SPBC530.12c

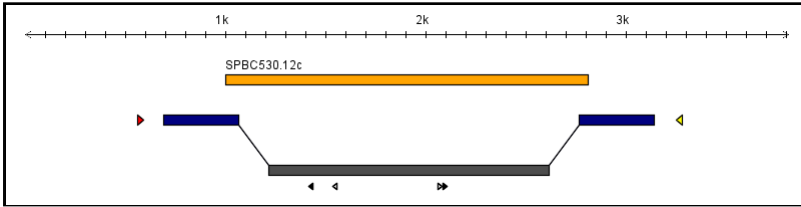

SPBC530.13

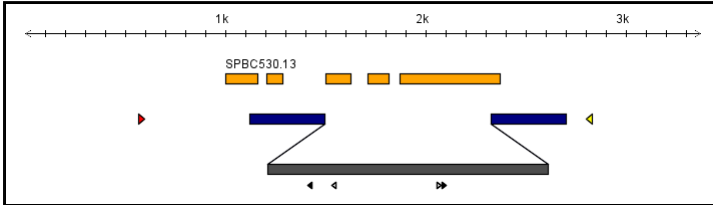

SPBC530.14c

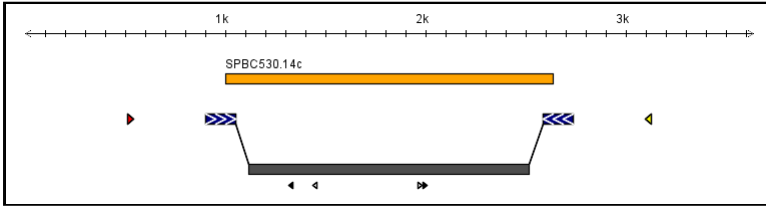

SPBC530.15c

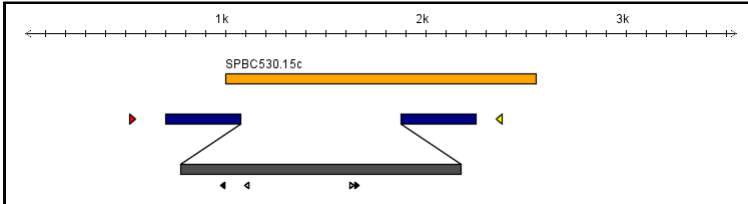

SPBC543.02c

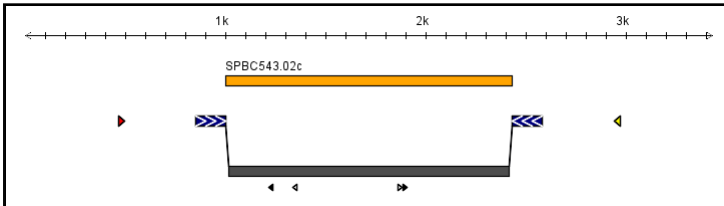

SPBC543.03c

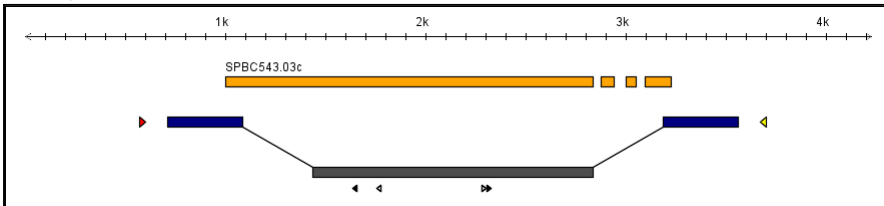

SPBC543.04

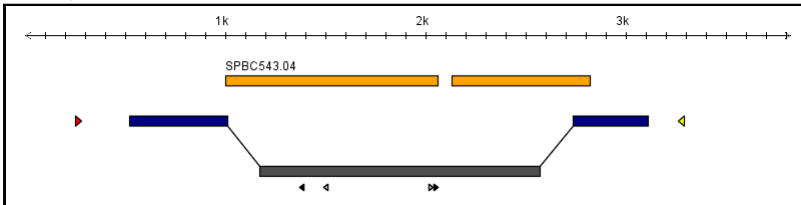

SPBC543.06c

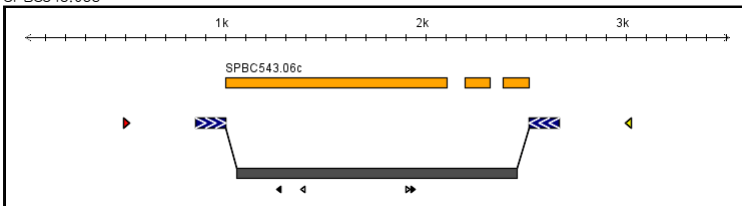

SPBC543.07

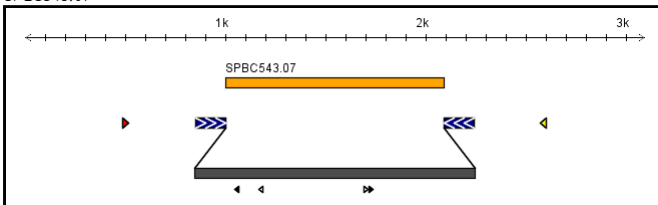

SPBC543.08

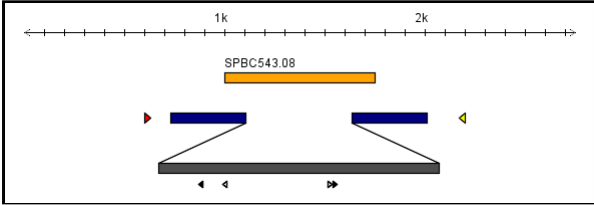

SPBC543.10

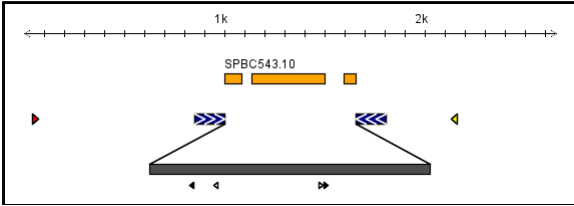

SPBC557.02c

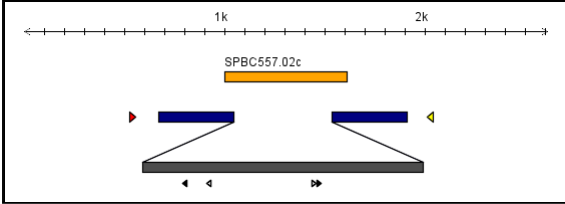

SPBC557.03c

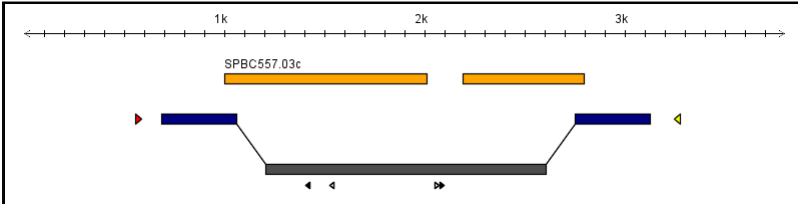

SPBC557.05

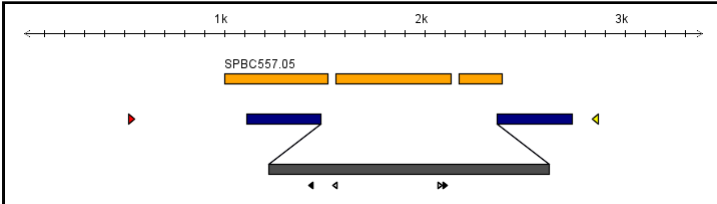

SPBC56F2.01

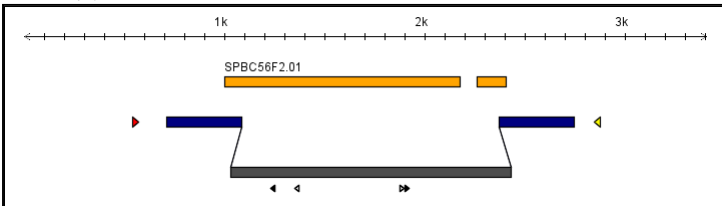

SPBC56F2.02

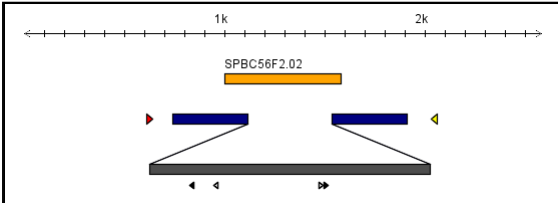

SPBC56F2.03

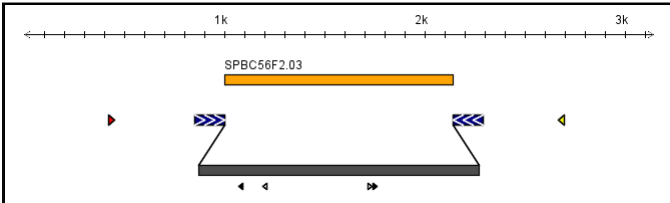

SPBC56F2.05c

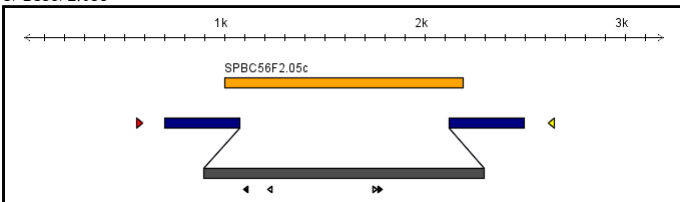



SPBC56F2.06

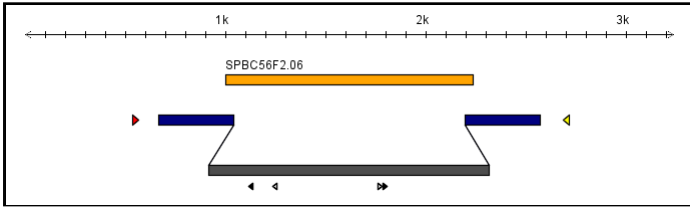

SPBC56F2.09c

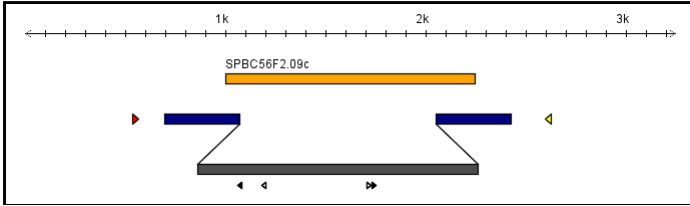

SPBC56F2.10c

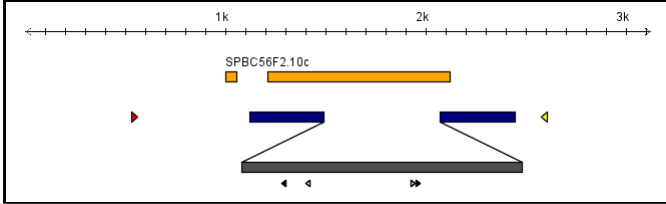

SPBC56F2.11

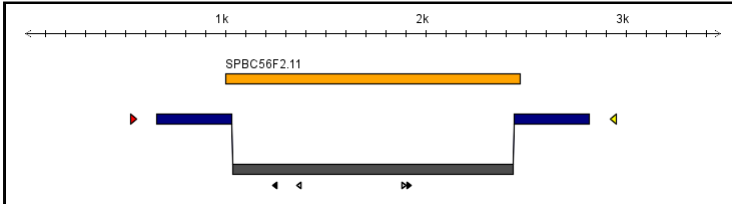

SPBC56F2.12

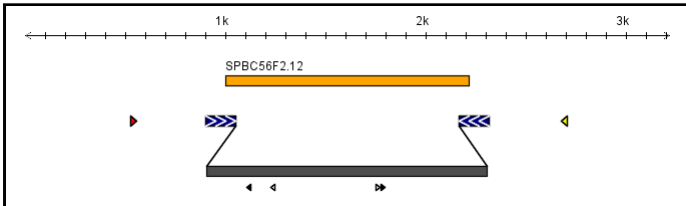

SPBC56F2.14

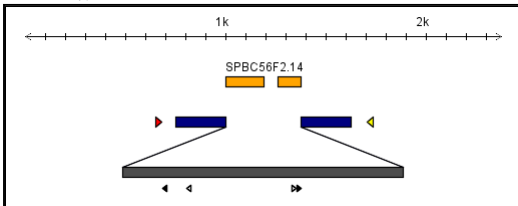

SPBC577.02

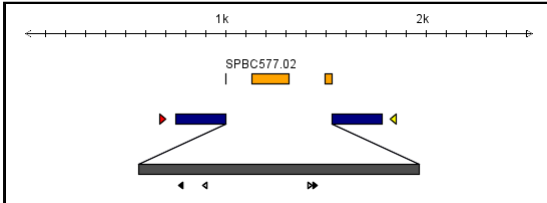

SPBC577.03c

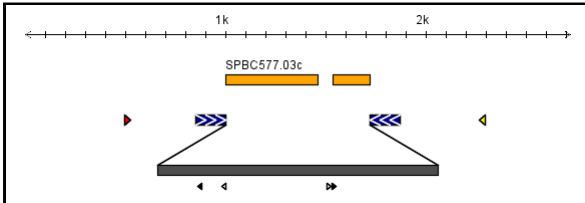

SPBC577.04

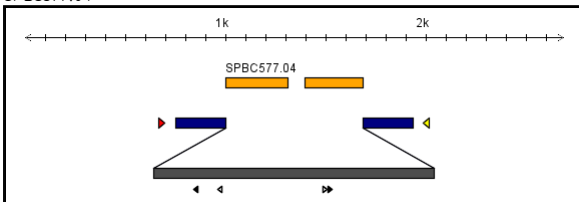

SPBC577.05c

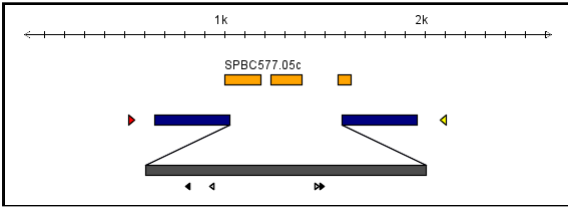

SPBC577.07

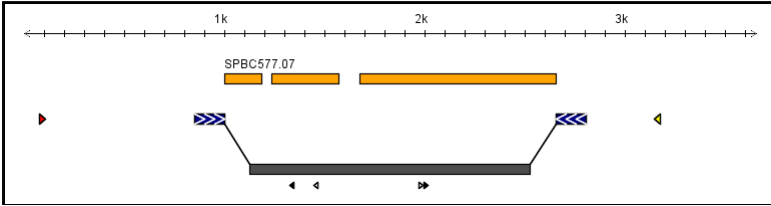

SPBC577.08c

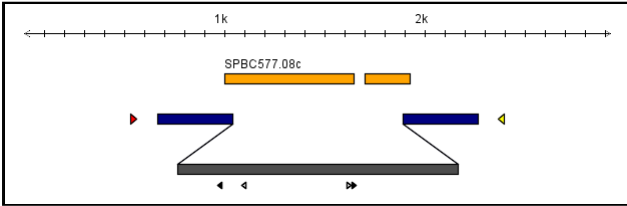

SPBC577.09

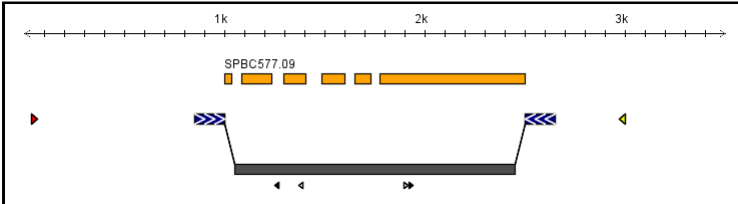

SPBC577.10

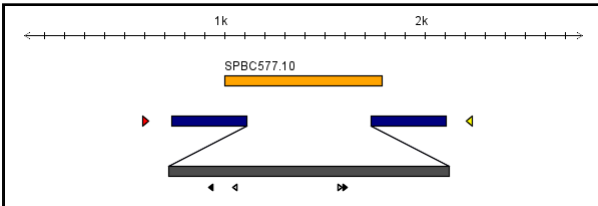

SPBC577.11

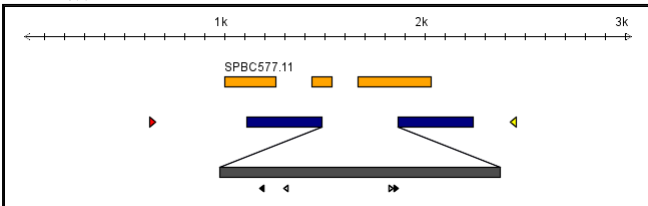

SPBC577.12

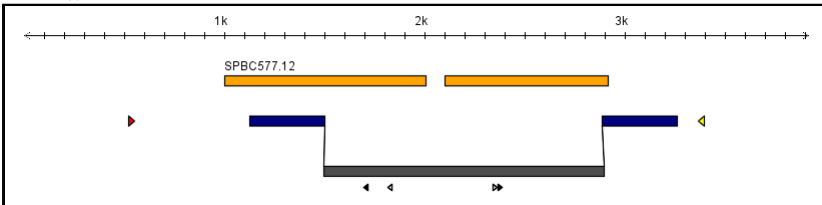

SPBC577.14c

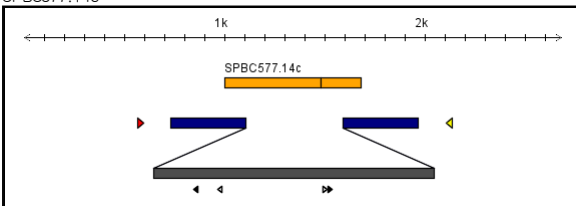

SPBC577.15c

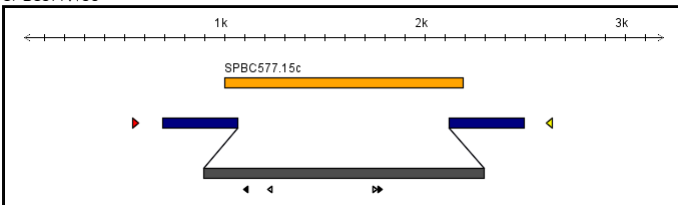

SPBC582.03

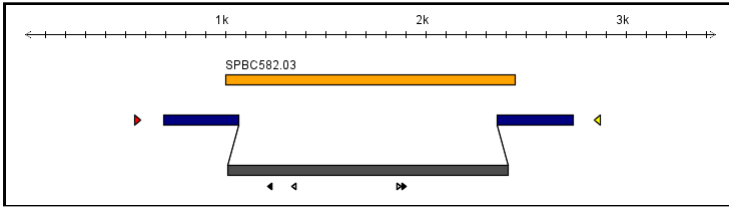

SPBC582.04c

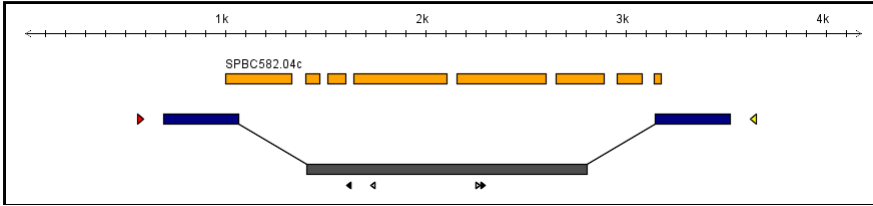

SPBC582.06c

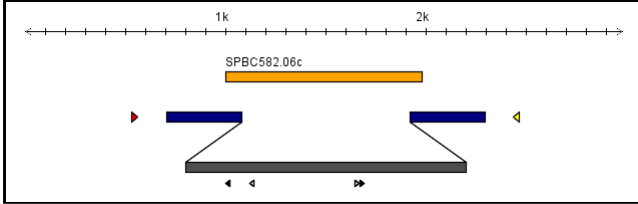

SPBC582.07c

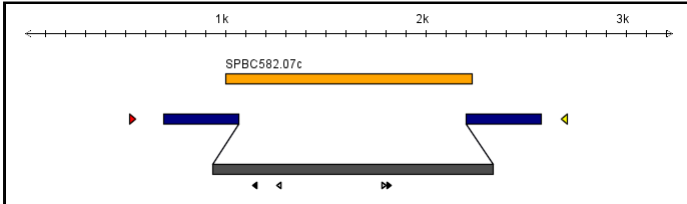

SPBC582.08

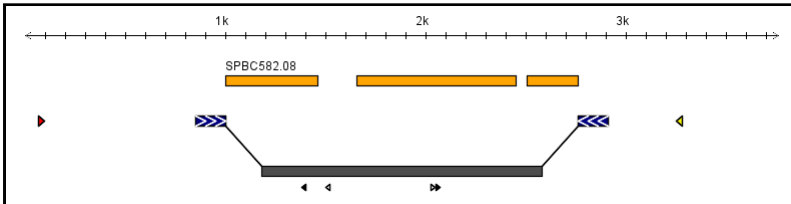

SPBC582.09

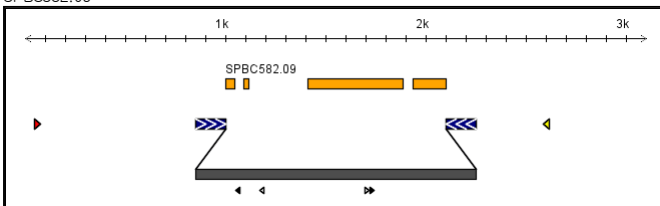

SPBC609.02

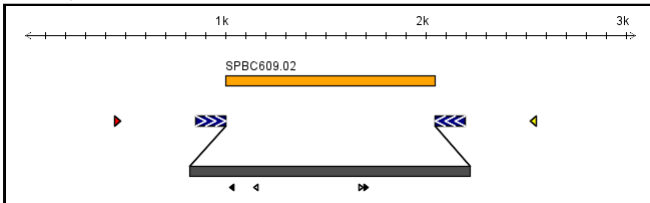

SPBC609.04

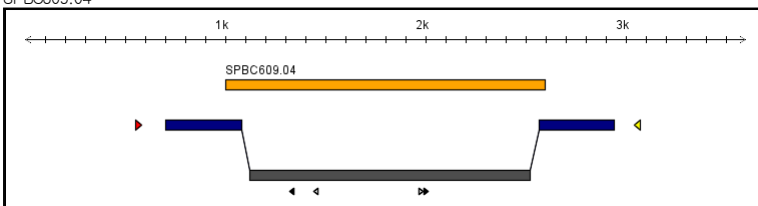

SPBC609.05

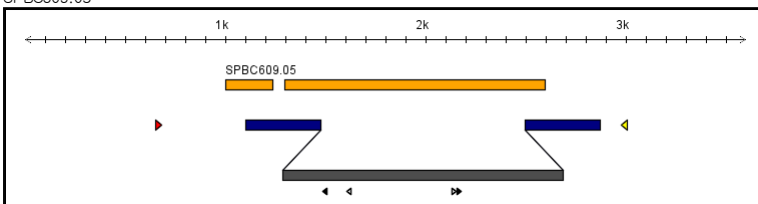

SPBC646.03

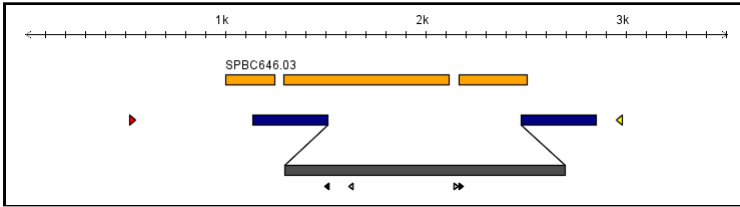

SPBC646.04

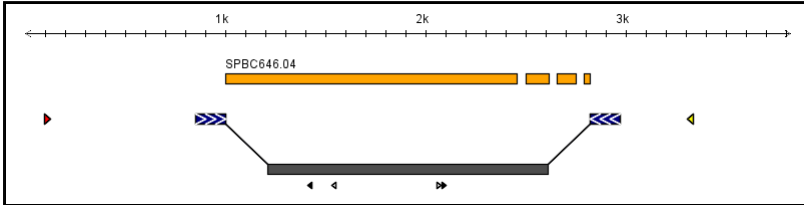

SPBC646.05c

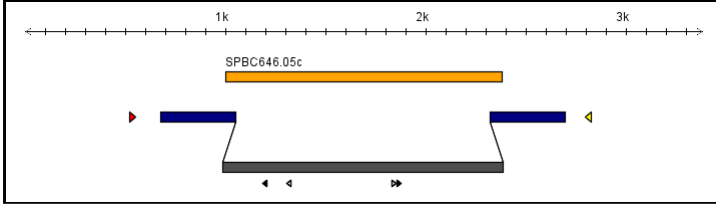

SPBC646.06c

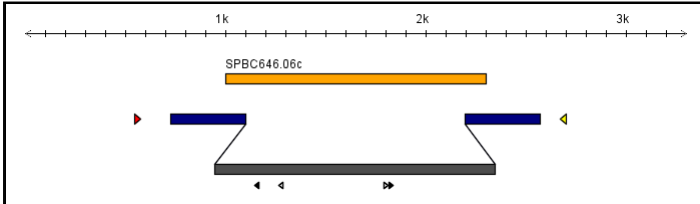

SPBC646.07c

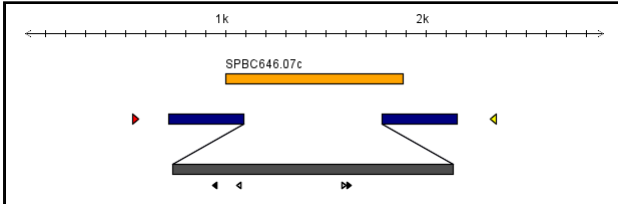

SPBC646.08c

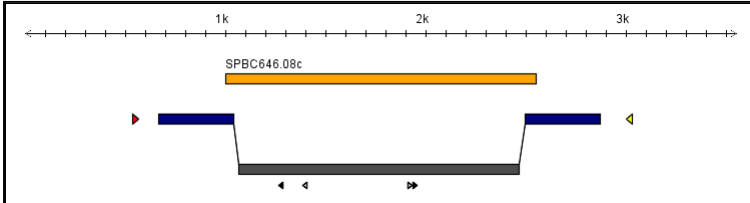

SPBC646.09c

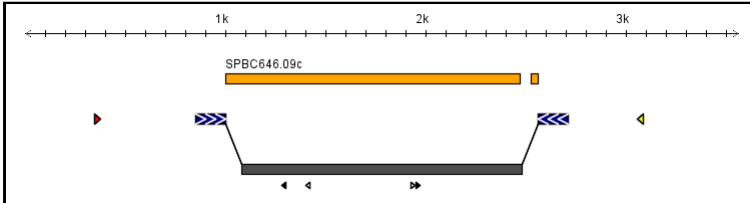

SPBC646.10c

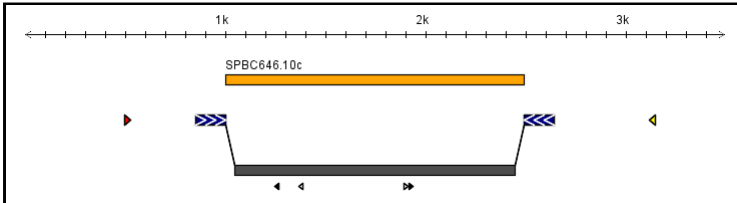

SPBC646.11

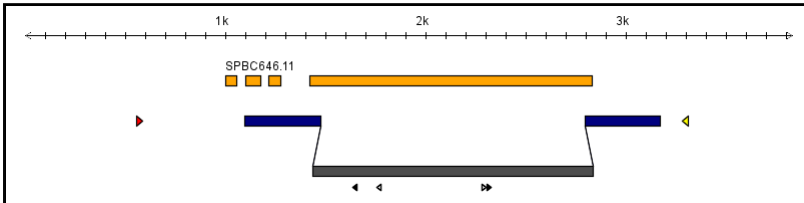

SPBC646.12c

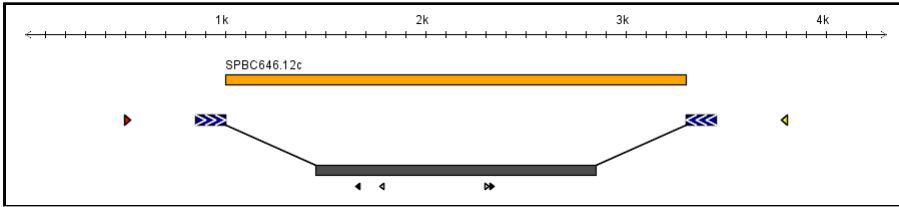

SPBC646.13

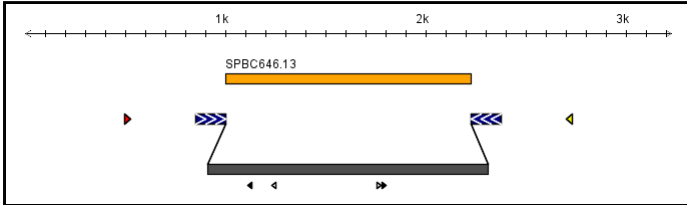

SPBC646.14c

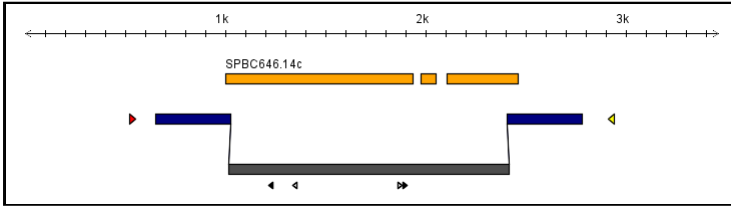

SPBC646.15c

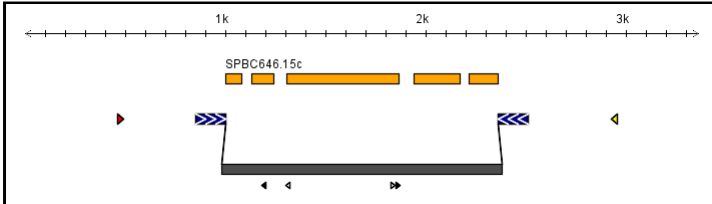

SPBC646.16

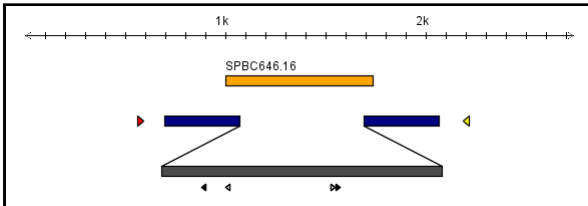

SPBC649.03

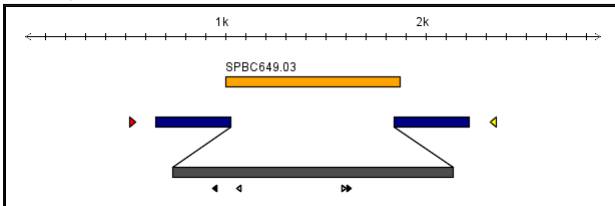

SPBC649.04

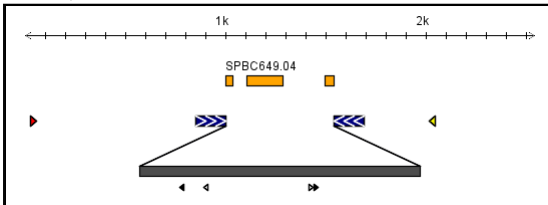

SPBC649.05

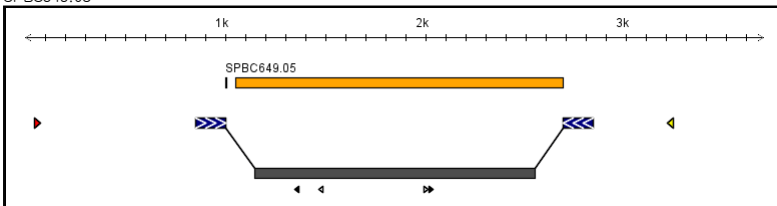

SPBC651.01c

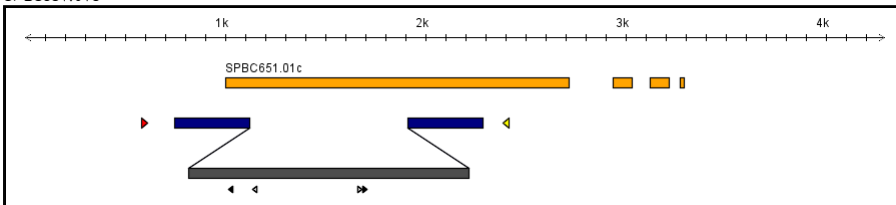

SPBC651.02

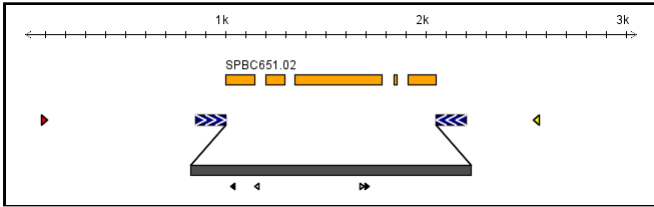

SPBC651.03c

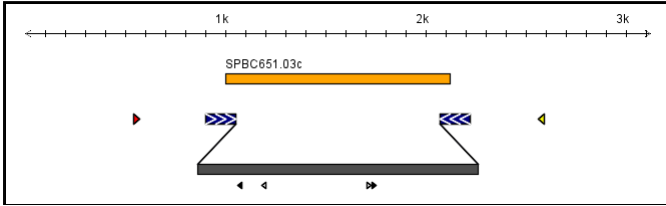

SPBC651.04

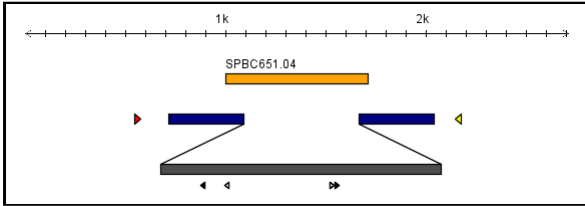

SPBC651.05c

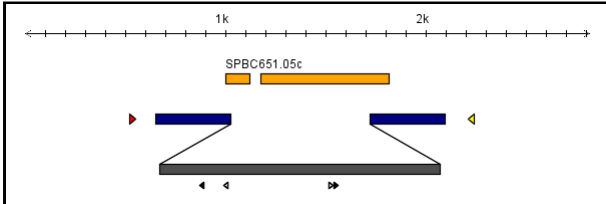

SPBC651.06

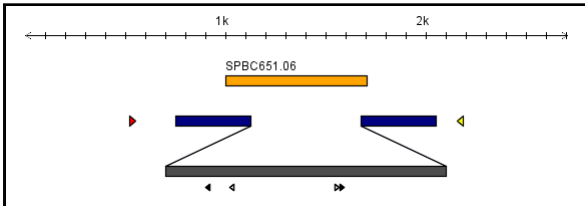

SPBC651.07

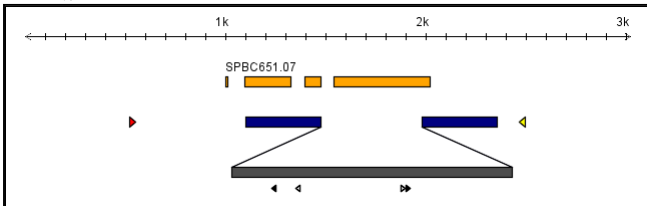

SPBC651.09c

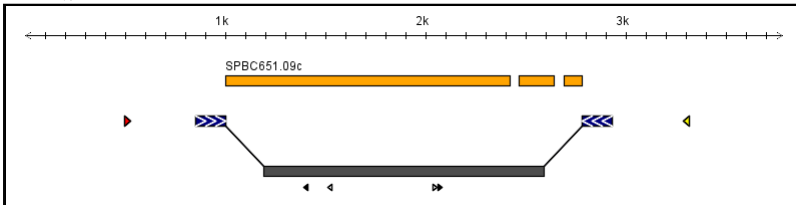

SPBC651.10

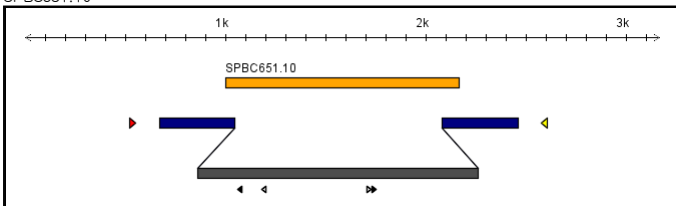

SPBC651.11c

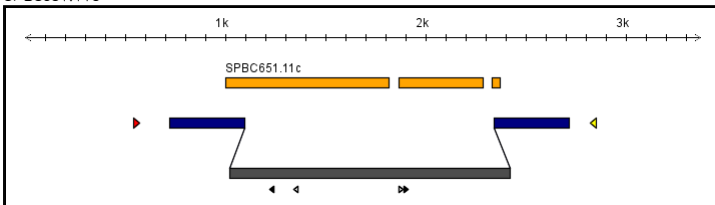

SPBC651.12c

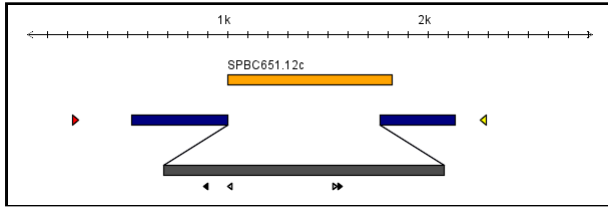

SPBC660.05

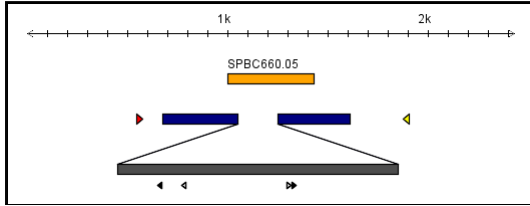

SPBC660.06

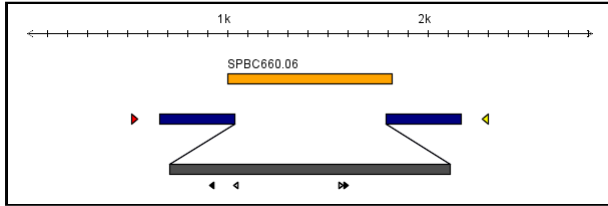

SPBC660.07

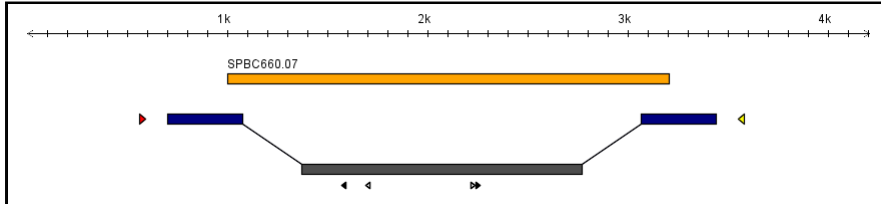

SPBC660.08

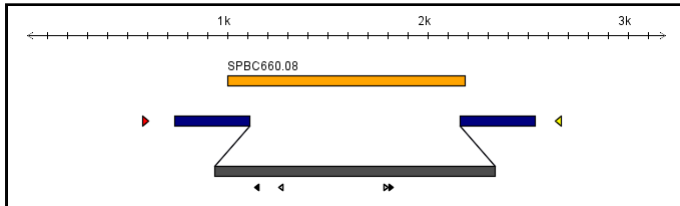

SPBC660.09

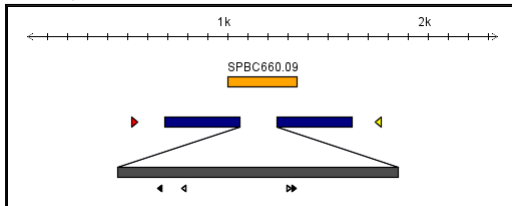

SPBC660.11

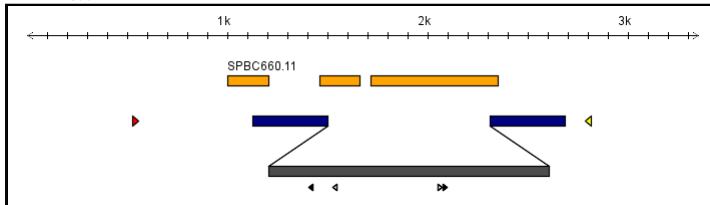

SPBC660.12c

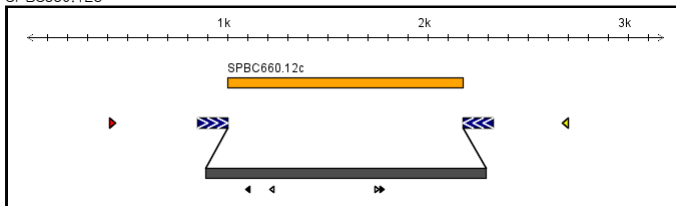

SPBC660.13c

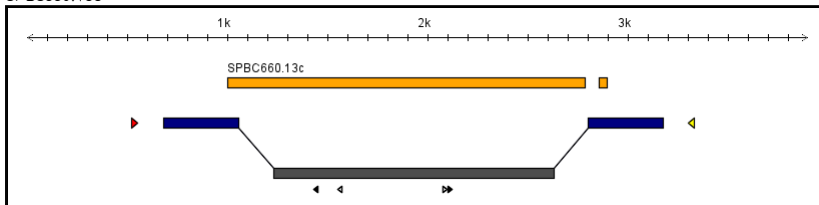

SPBC660.14

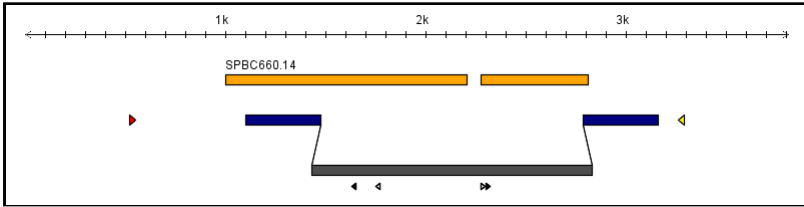

SPBC660.15

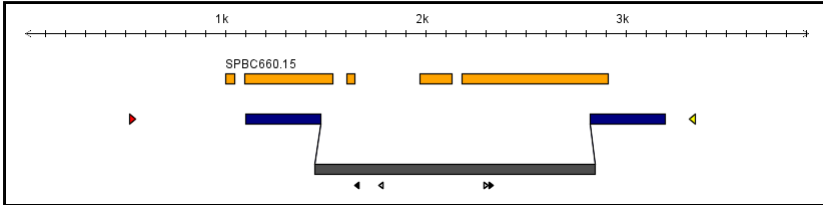

SPBC660.16

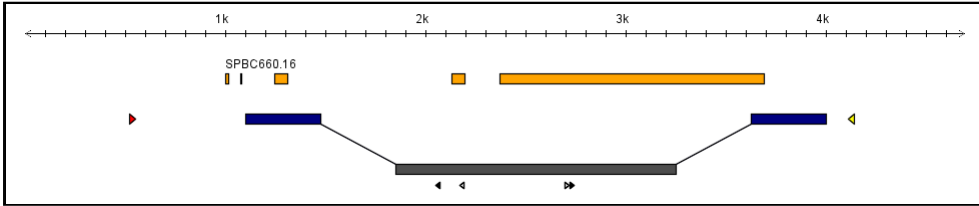

SPBC660.17c

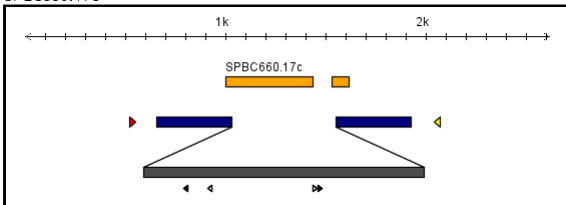

SPBC685.02

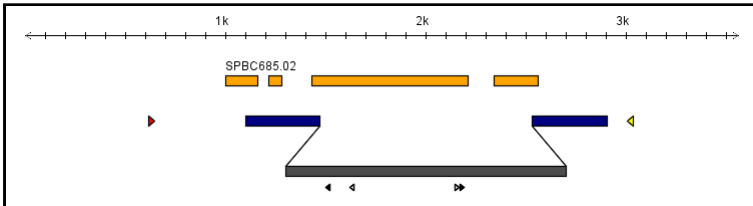

SPBC685.03

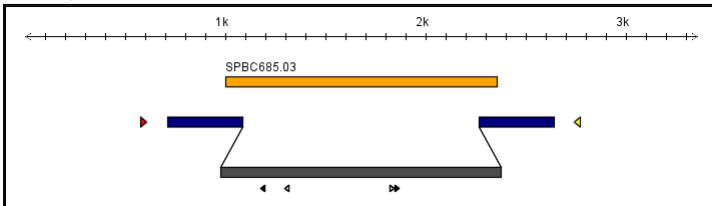

SPBC685.04c

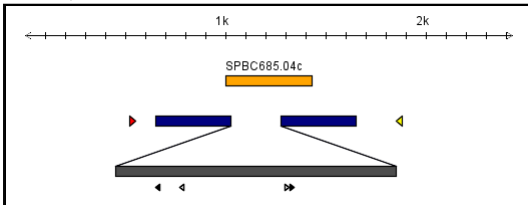

SPBC685.06

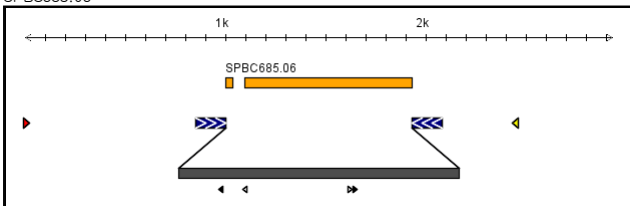

SPBC685.09

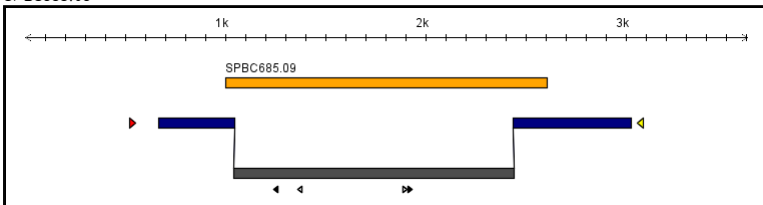



SPBC691.02c

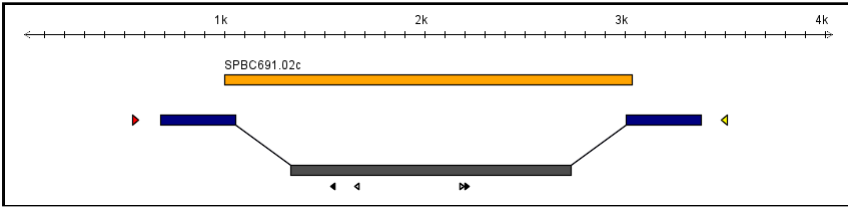

SPBC691.04

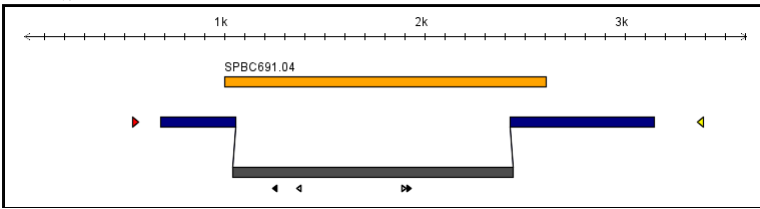

SPBC691.05c

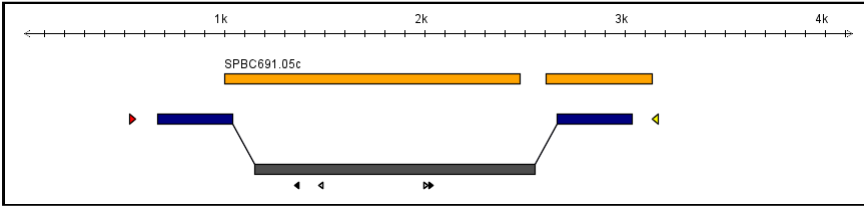

SPBC713.03

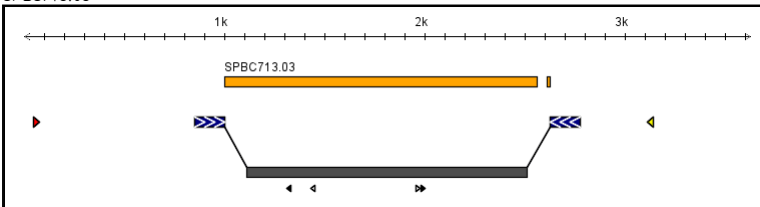

SPBC713.04c

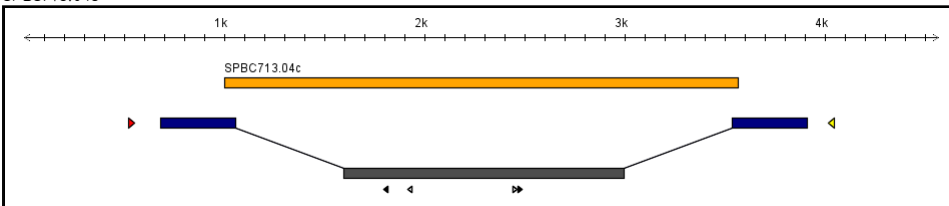

SPBC713.05

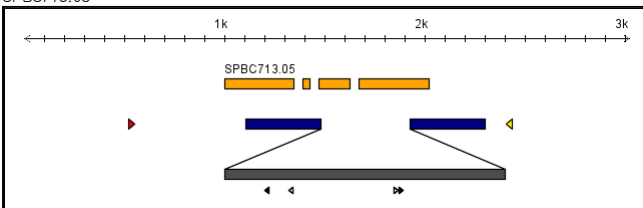

SPBC713.07c

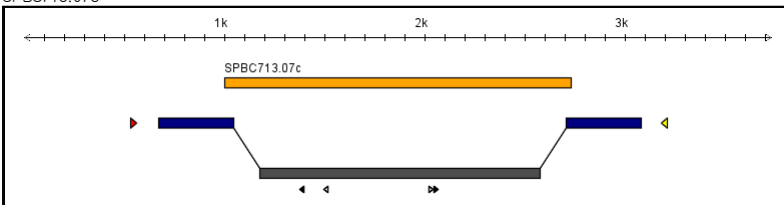

SPBC713.08

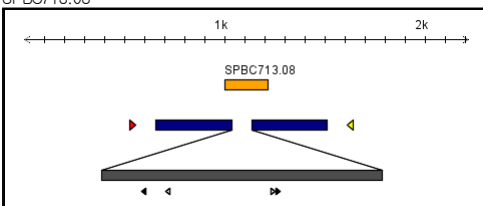

SPBC713.09

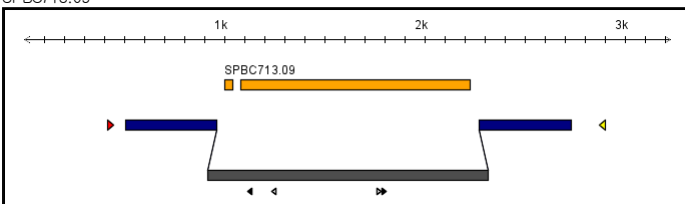

SPBC713.10

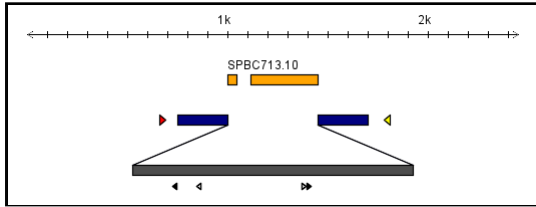

SPBC713.11c

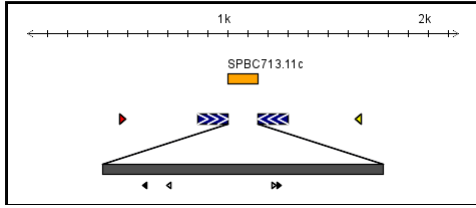

SPBC713.12

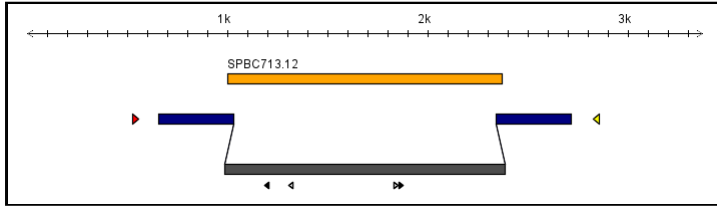

SPBC725.01

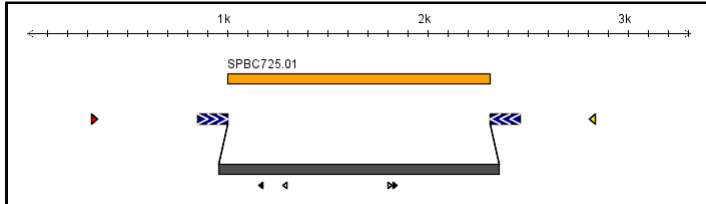

SPBC725.02

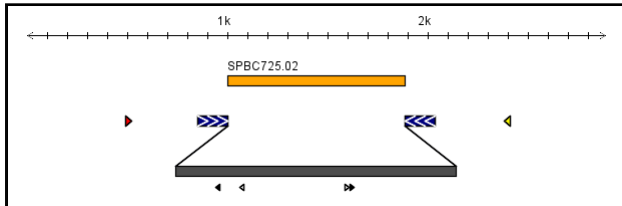

SPBC725.03

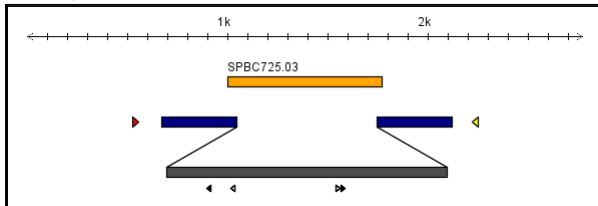

SPBC725.04

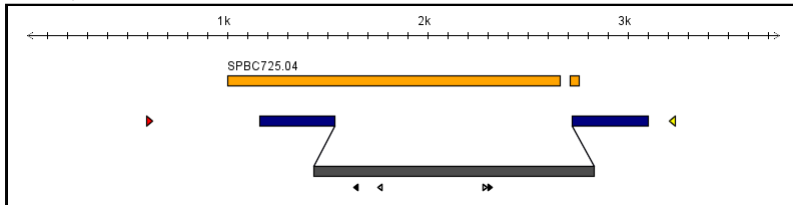

SPBC725.05c

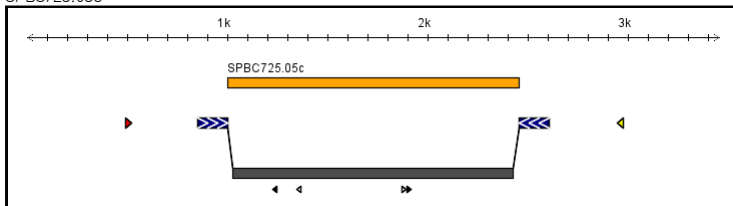

SPBC725.07

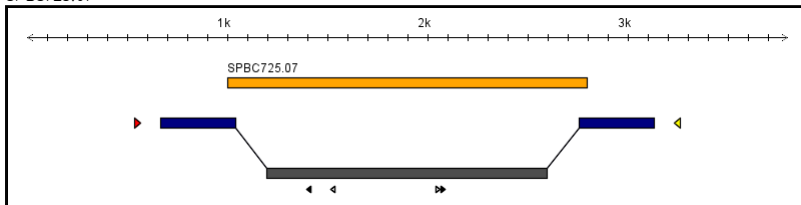

SPBC725.08

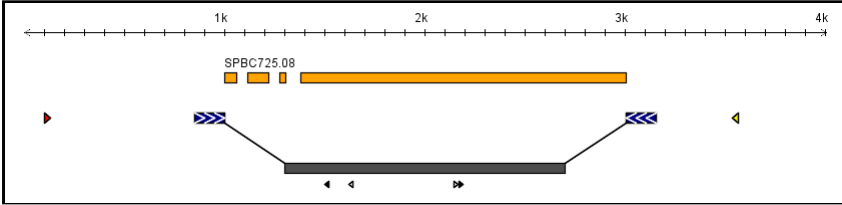

SPBC725.09c

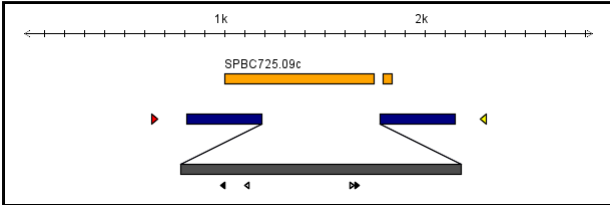

SPBC725.10

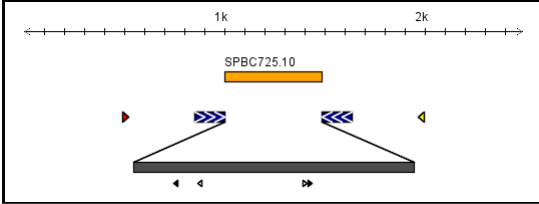

SPBC725.11c

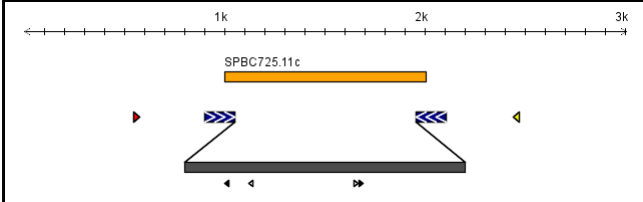

SPBC725.13c

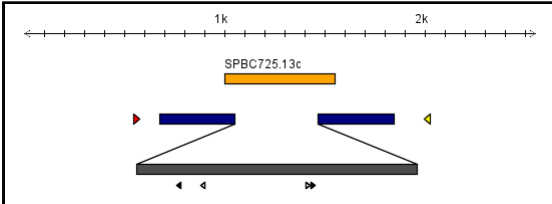

SPBC725.14

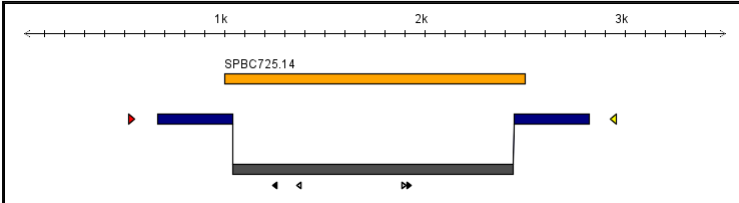

SPBC725.15

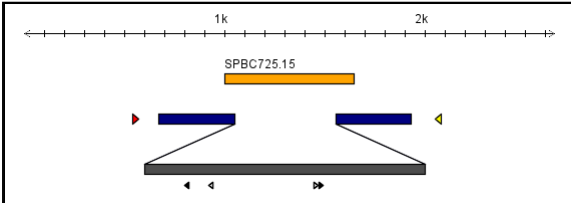

SPBC725.16

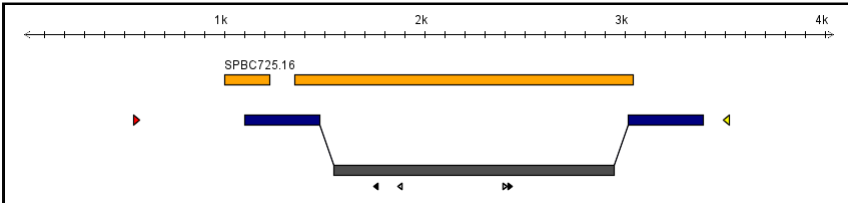

SPBC725.17c

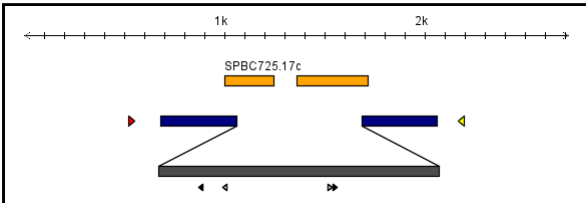

SPBC776.01

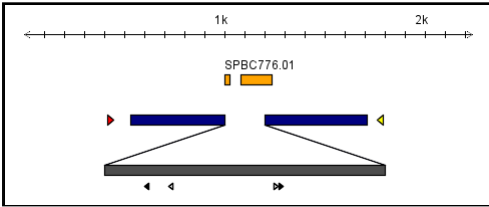

SPBC776.02c

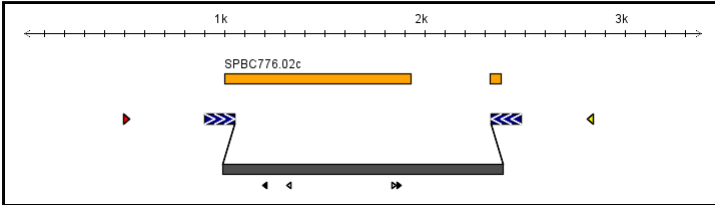

SPBC776.03

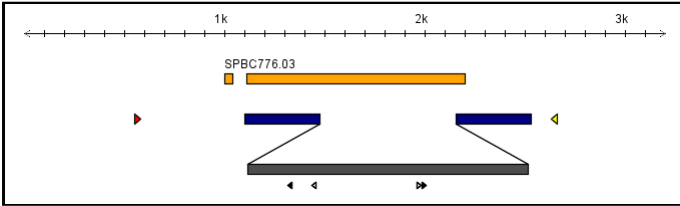

SPBC776.04

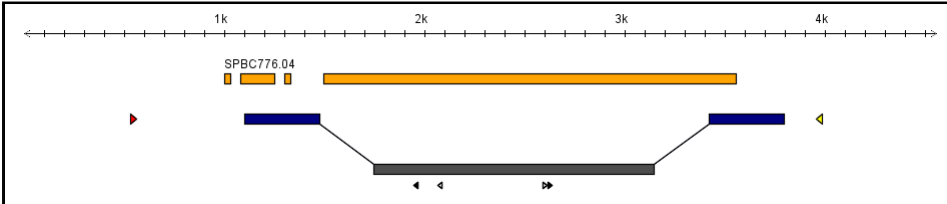

SPBC776.05

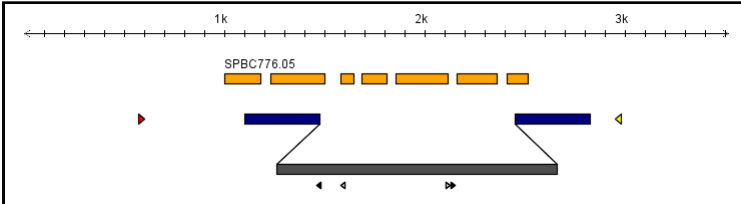

SPBC776.06c

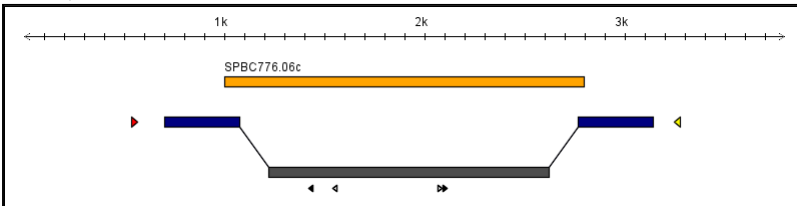

SPBC776.07

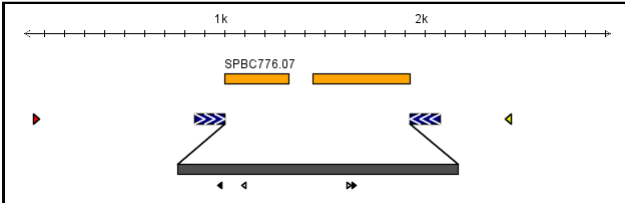

SPBC776.09

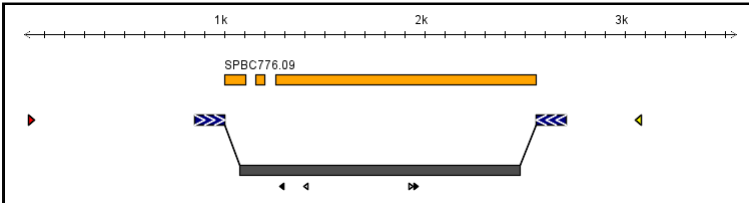

SPBC776.10c

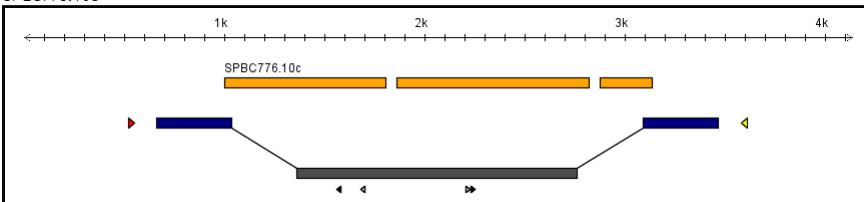

SPBC776.11

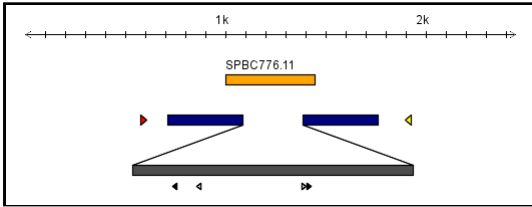

SPBC776.12c

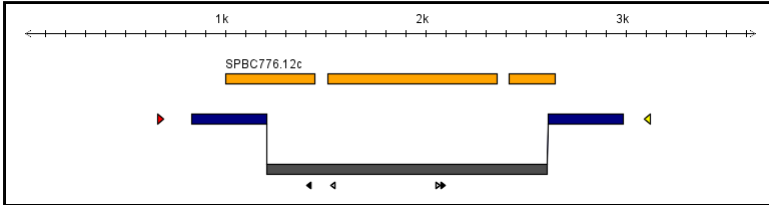

SPBC776.14

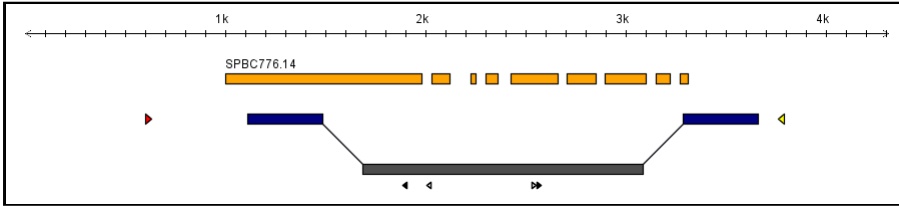

SPBC776.15c

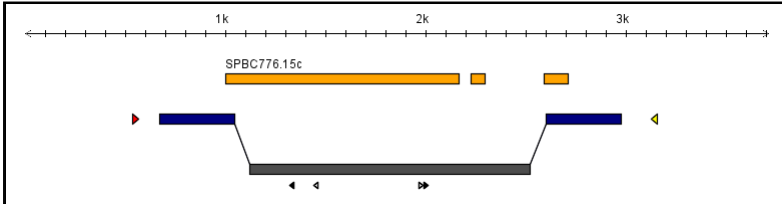

SPBC776.16

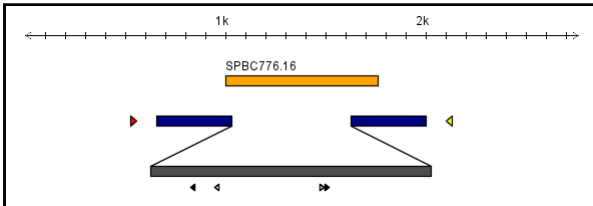

SPBC776.17

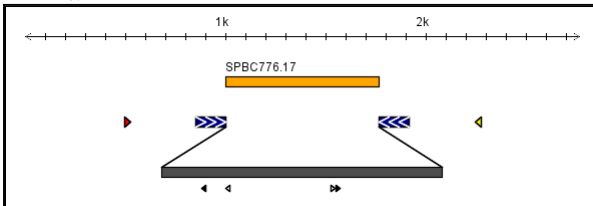

SPBC776.18c

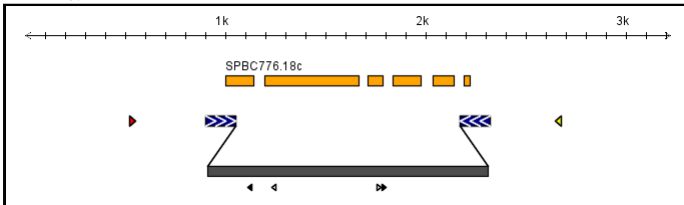

SPBC800.02

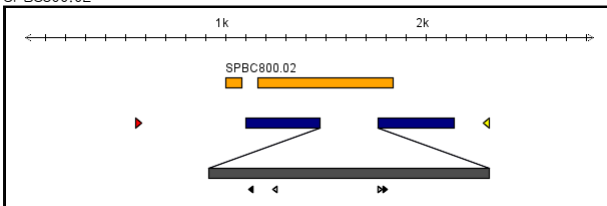

SPBC800.03

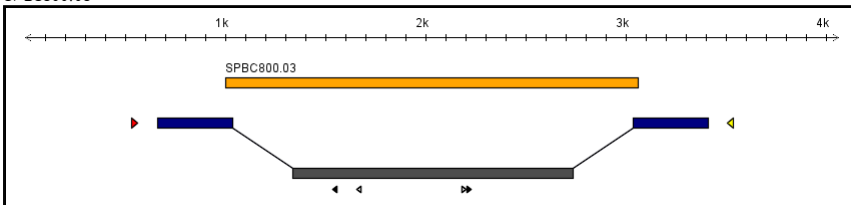

SPBC800.05c

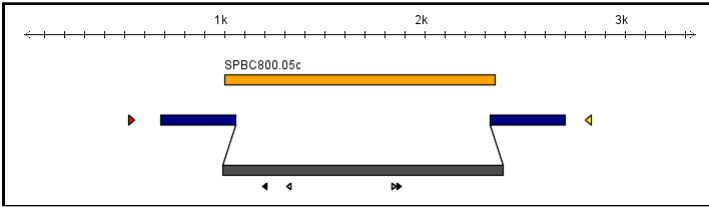

SPBC800.06

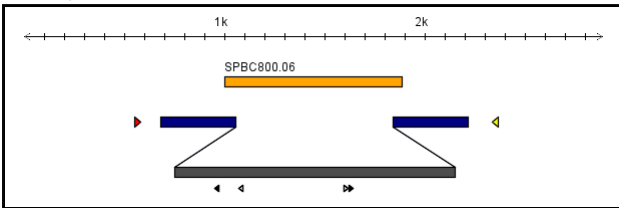

SPBC800.07c

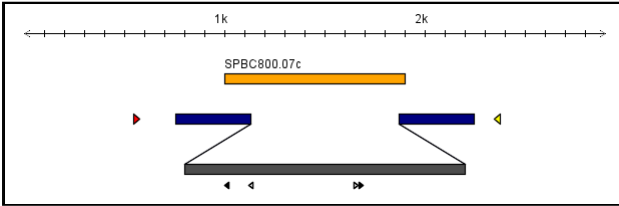

SPBC800.08

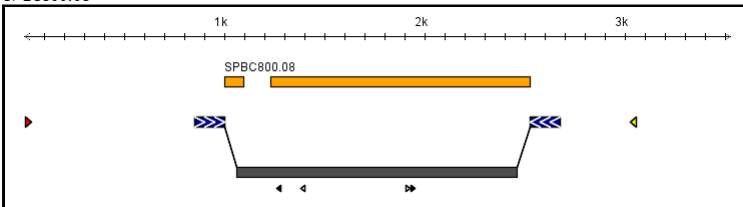

SPBC800.09

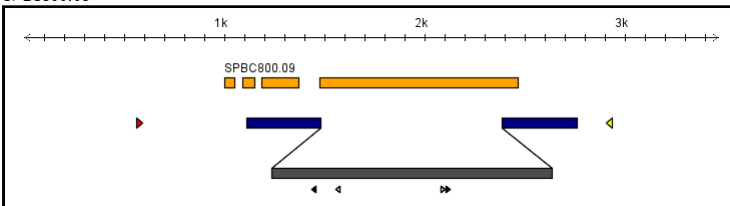

SPBC800.11

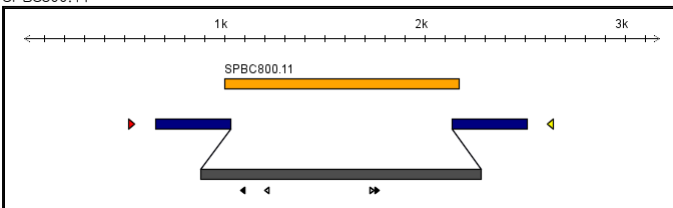

SPBC800.12c

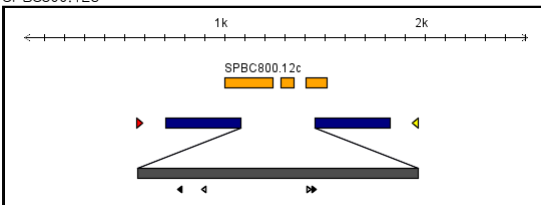

SPBC800.13

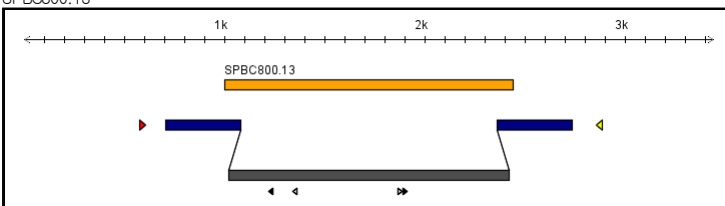

SPBC83.03c

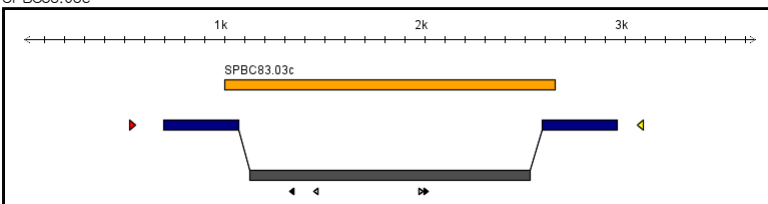

SPBC83.04

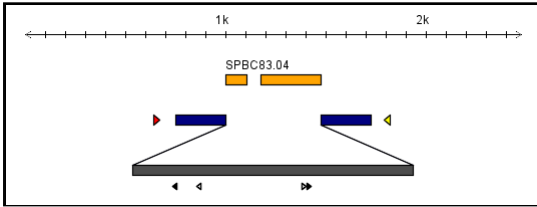

SPBC83.05

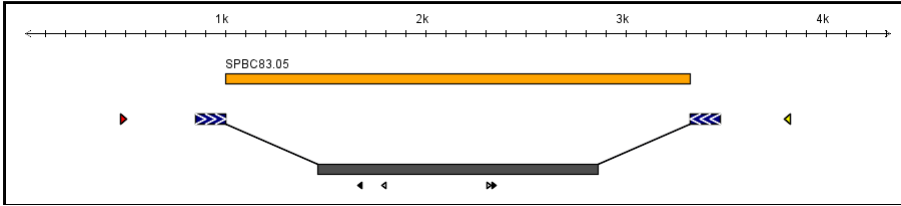

SPBC83.06c

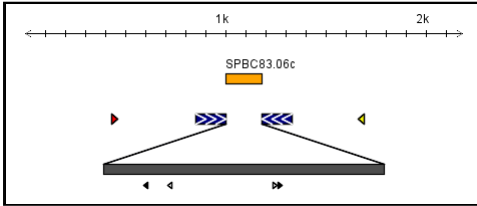

SPBC83.08

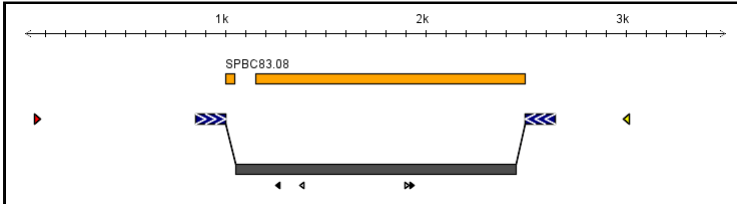

SPBC83.09c

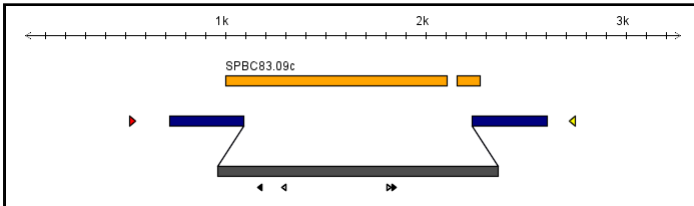

SPBC83.10

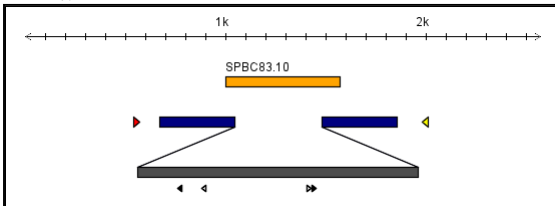

SPBC83.11

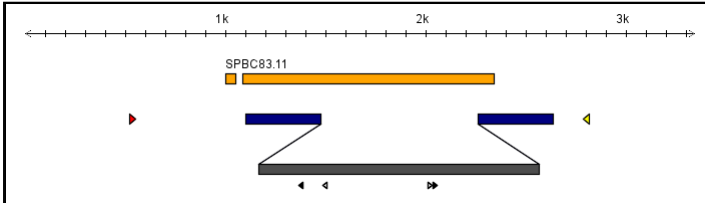

SPBC83.12

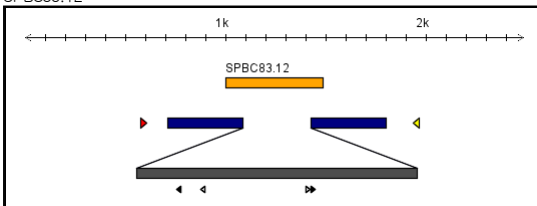

SPBC83.13

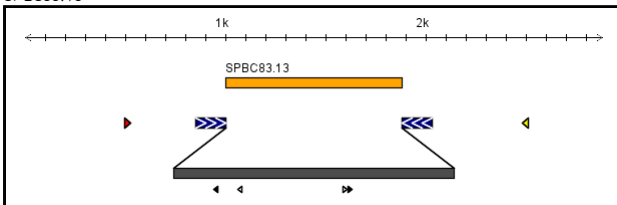

SPBC83.14c

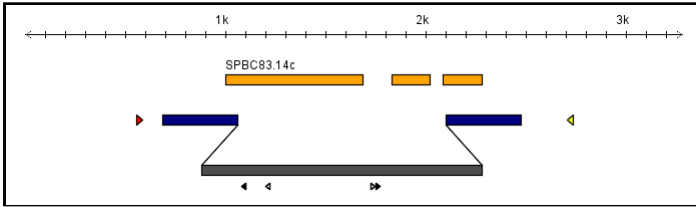

SPBC83.15

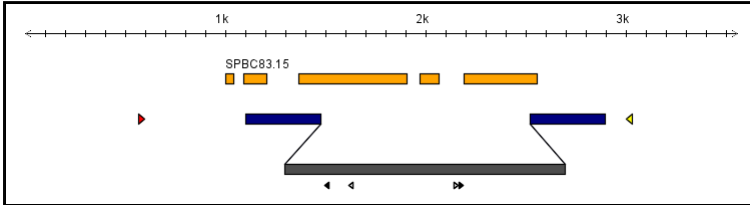

SPBC83.16c

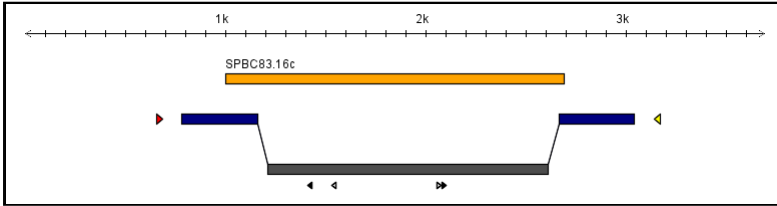

SPBC83.17

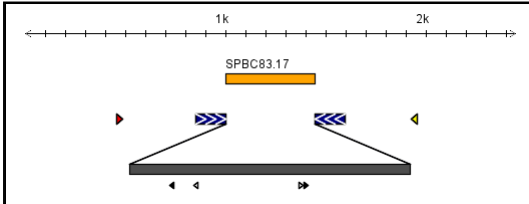

SPBC83.18c

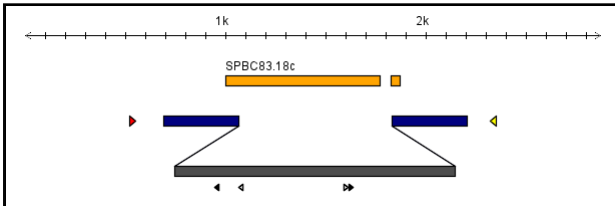

SPBC83.19c

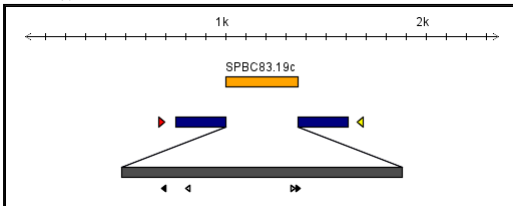

SPBC839.02

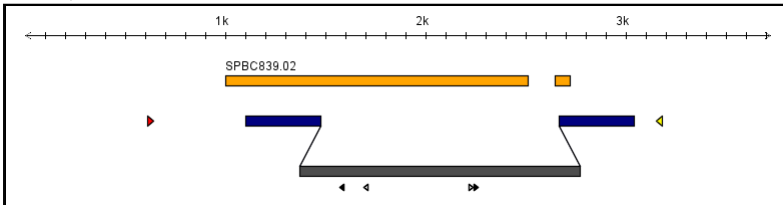

SPBC839.03c

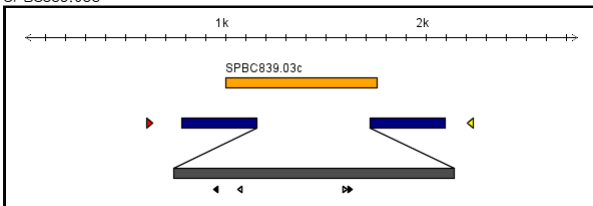

SPBC839.04

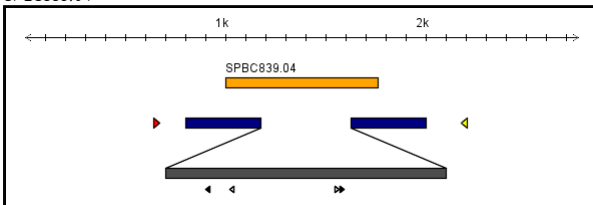



SPBC839.05c

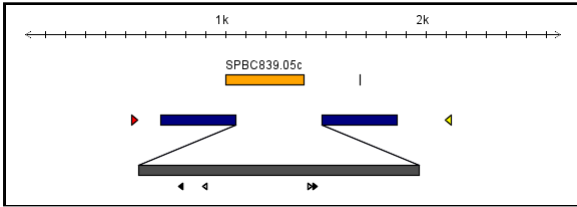

SPBC839.09c

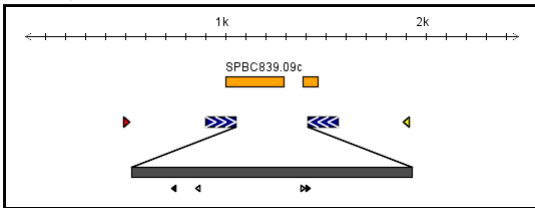

SPBC839.10

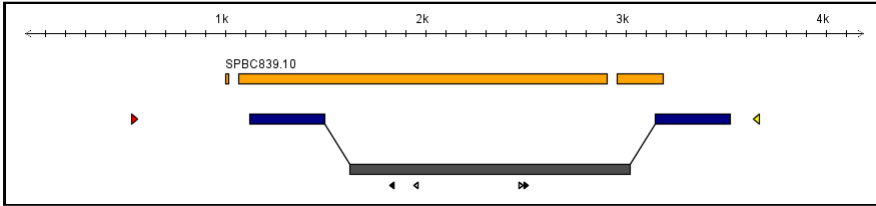

SPBC839.11c

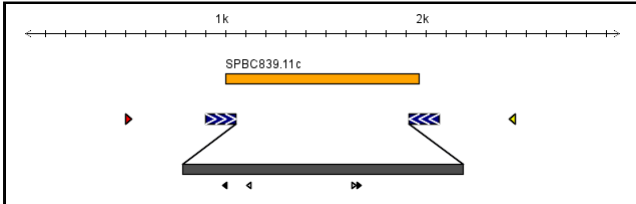

SPBC839.12

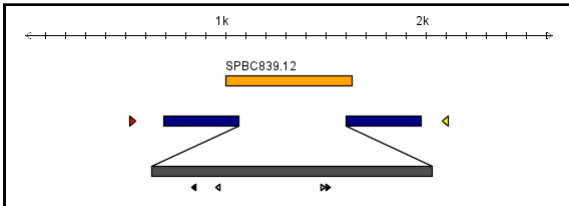

SPBC839.13c

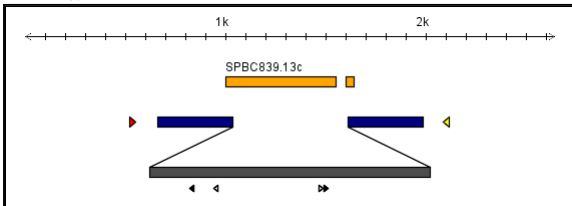

SPBC839.14c

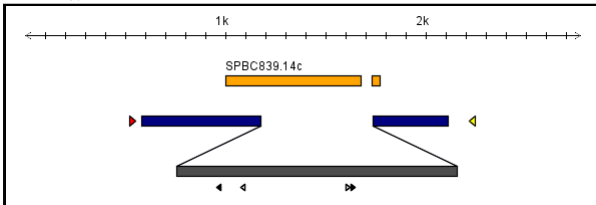

SPBC839.15c

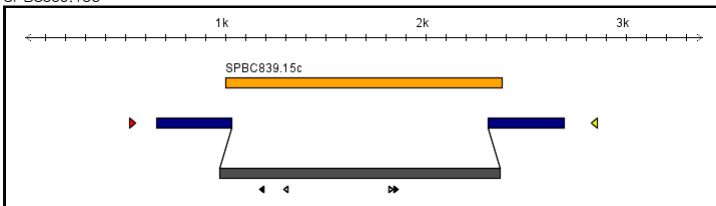

SPBC839.17c

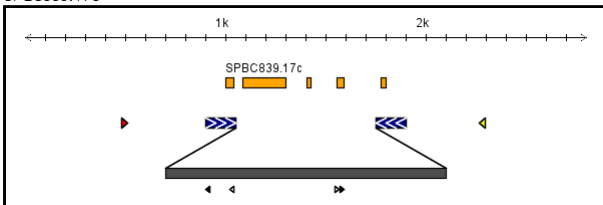

SPBC887.01

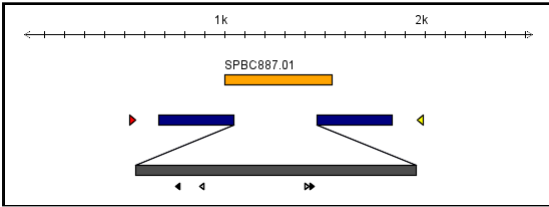

SPBC887.02

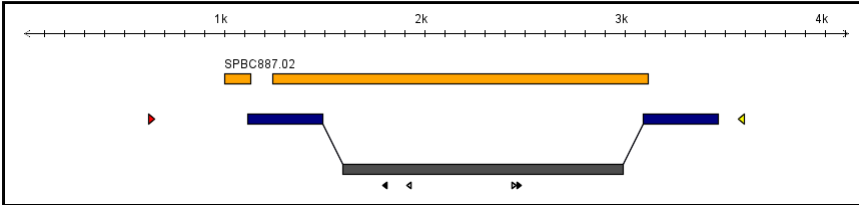

SPBC887.03c

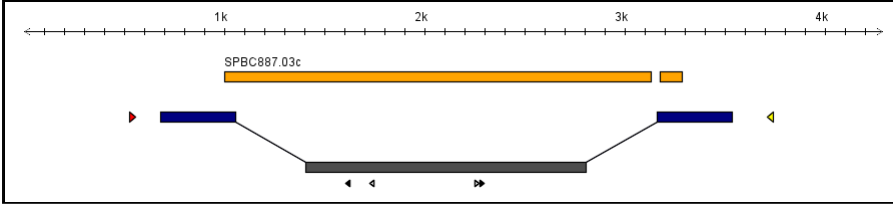

SPBC887.04c

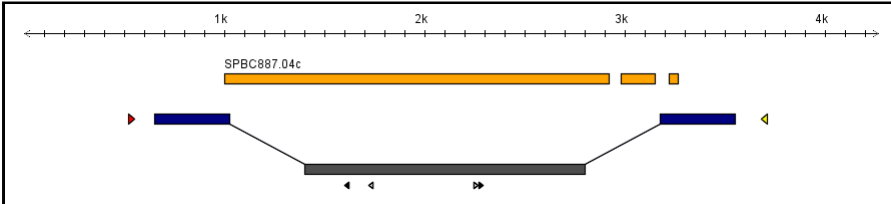

SPBC887.05c

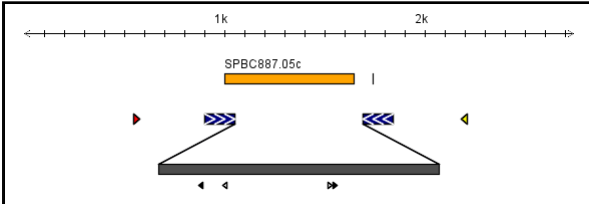

SPBC887.06c

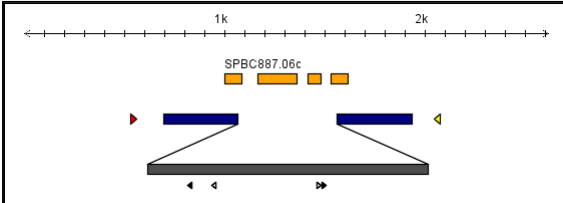

SPBC887.07

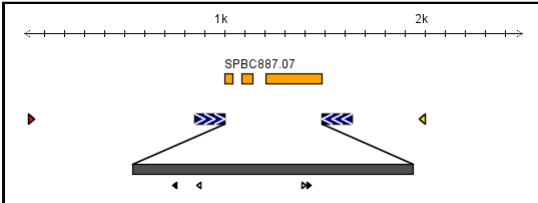

SPBC887.08

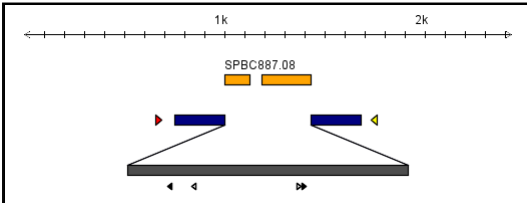

SPBC887.10

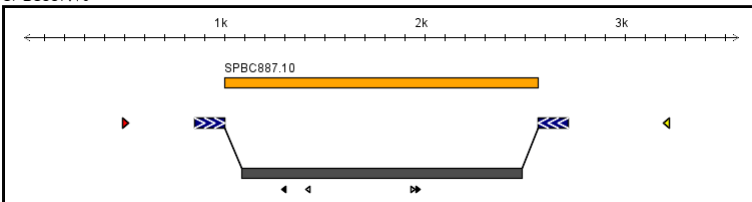

SPBC887.11

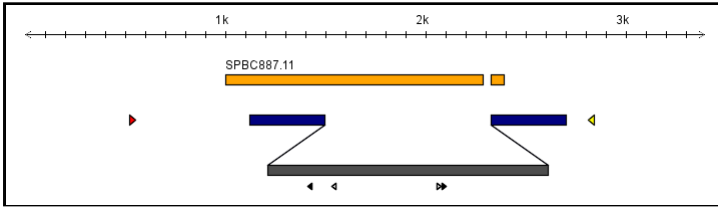

SPBC887.13c

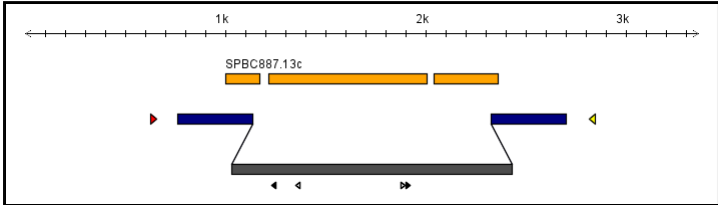

SPBC887.14c

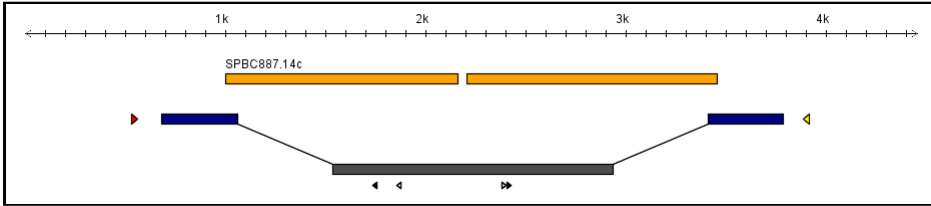

SPBC887.15c

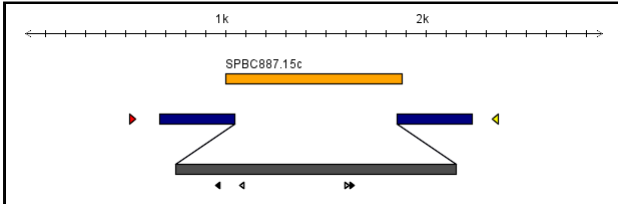

SPBC887.17

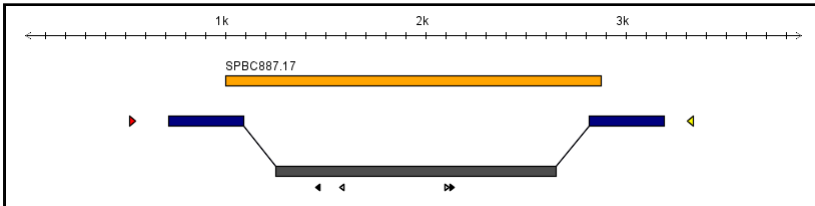

SPBC887.18c

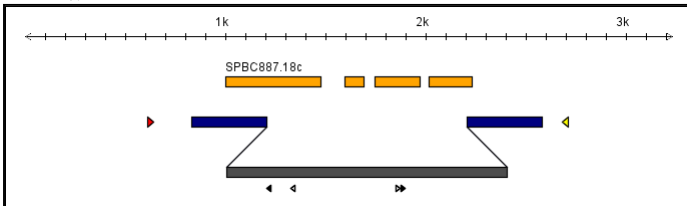

SPBC887.19

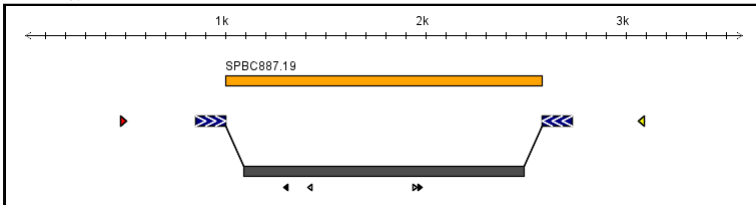

SPBC902.03

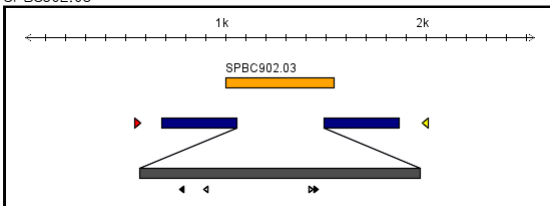

SPBC902.04

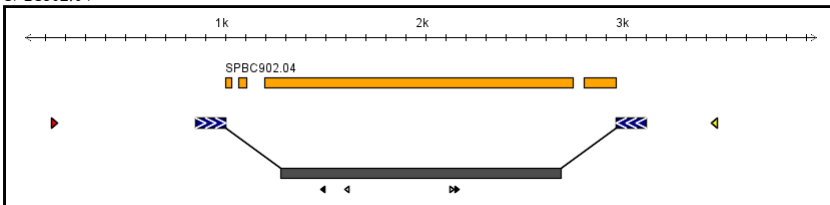

SPBC902.05c

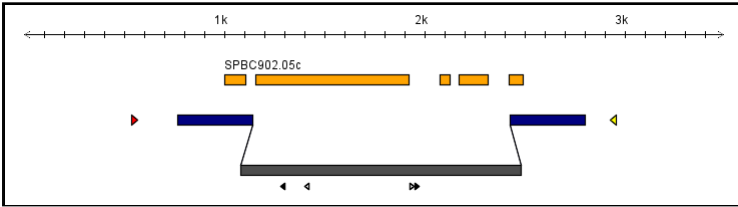

SPBC902.06

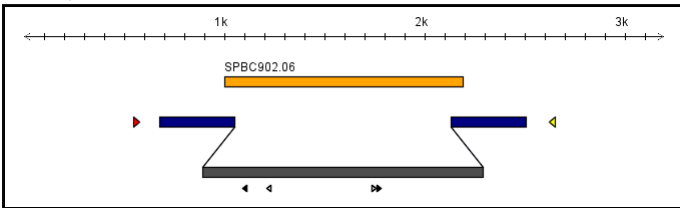

SPBC947.01

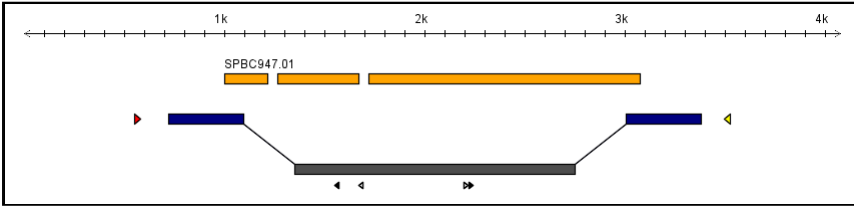

SPBC947.02

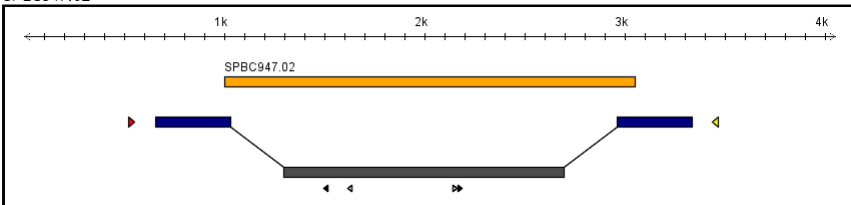

SPBC947.03c

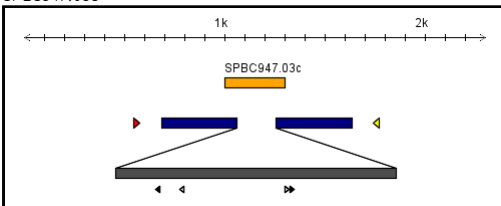

SPBC947.05c

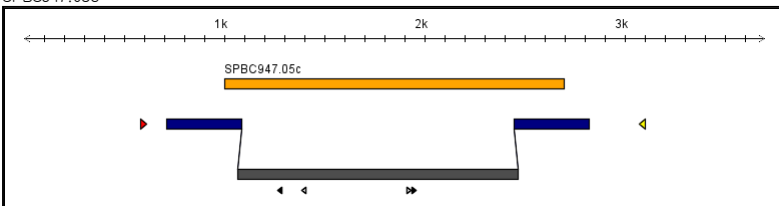

SPBC947.06c

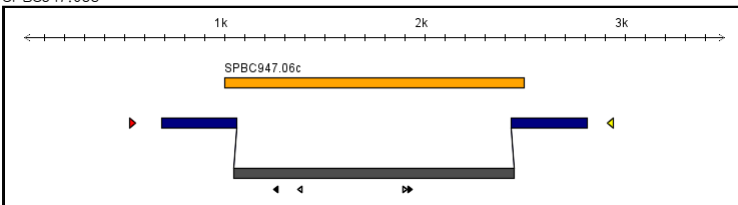

SPBC947.07

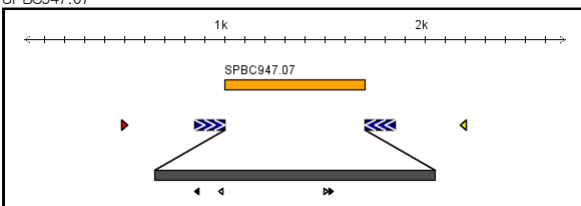

SPBC947.08c

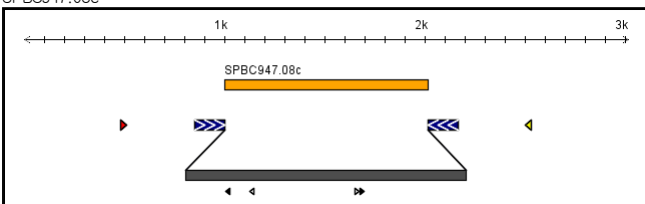

SPBC947.09

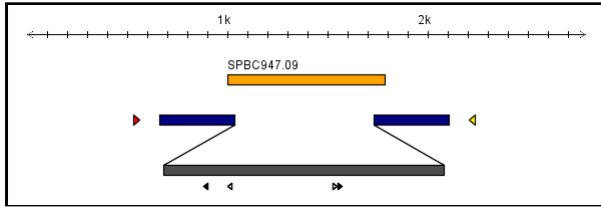

SPBC947.10

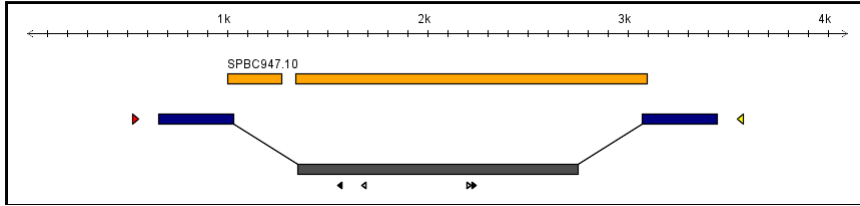

SPBC947.12

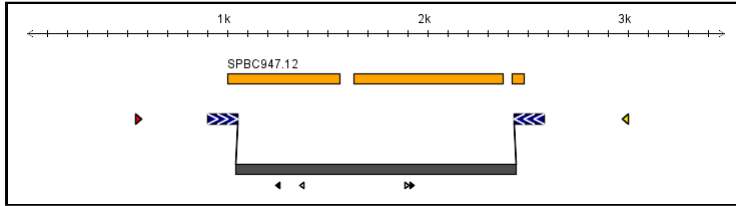

SPBC947.13

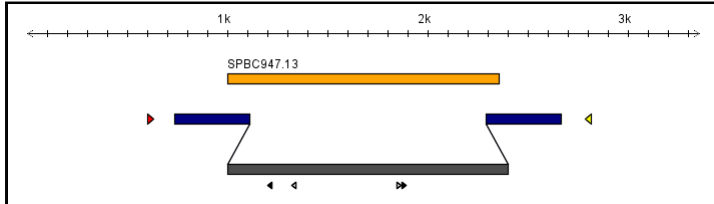

SPBC947.14c

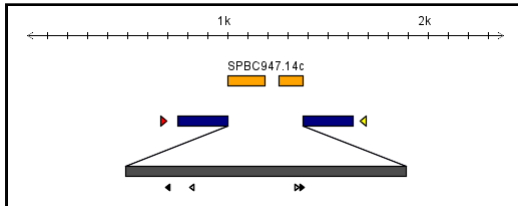

SPBC947.15c

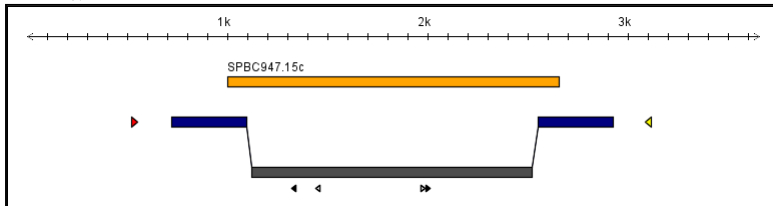

SPBCPT2R1.01c

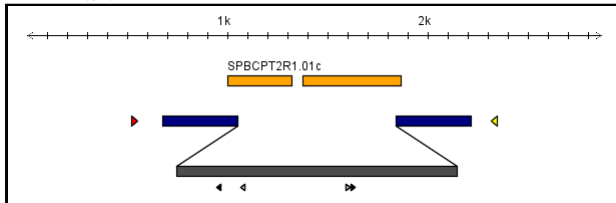

SPBCPT2R1.02

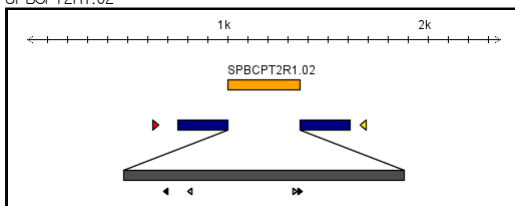

SPBCPT2R1.03

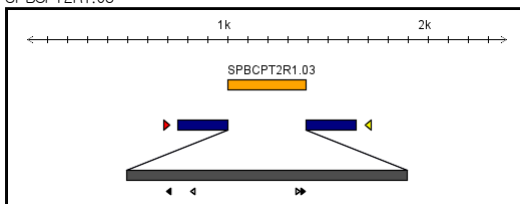

SPBCPT2R1.04c

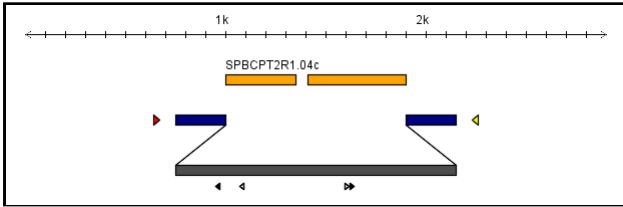

SPBP16F5.02

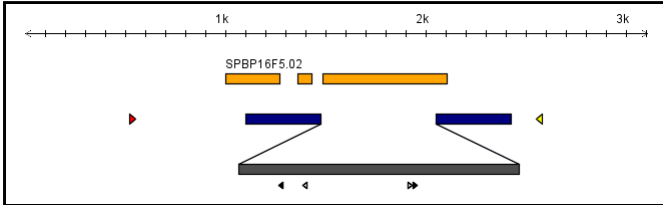

SPBP16F5.04

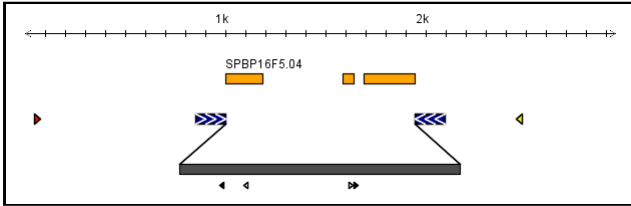

SPBP16F5.05c

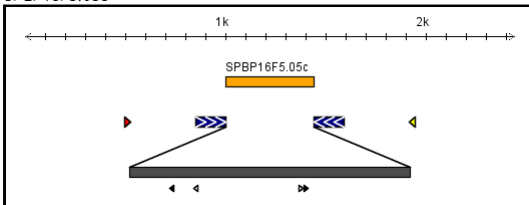

SPBP16F5.06

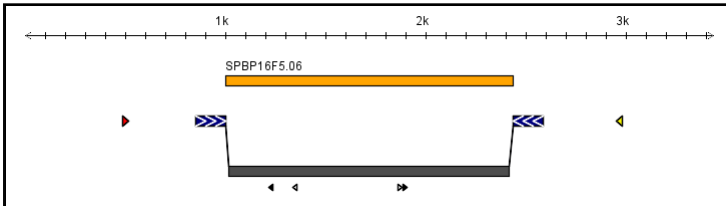

SPBP16F5.07

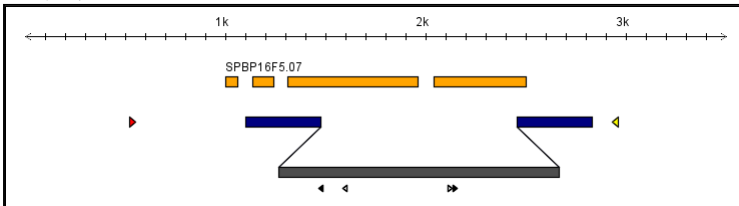

SPBP16F5.08c

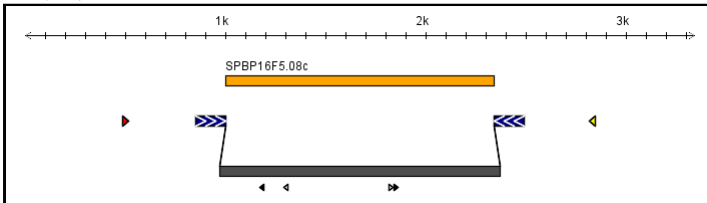

SPBP18G5.02

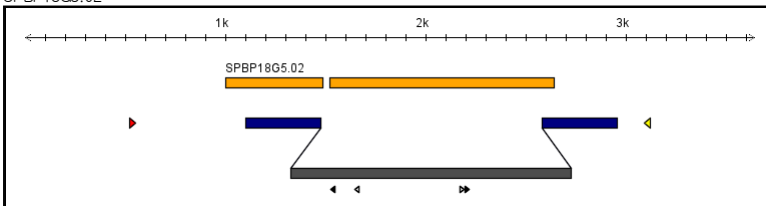

SPBP18G5.03

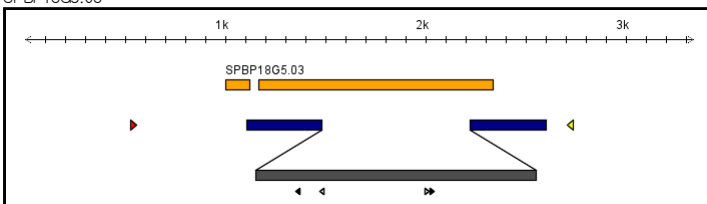

SPBP19A11.01

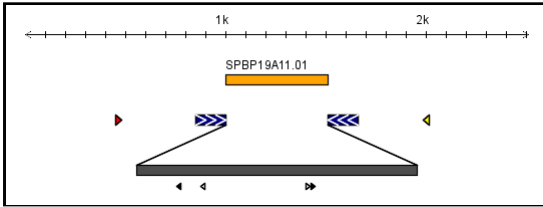

SPBP19A11.02c

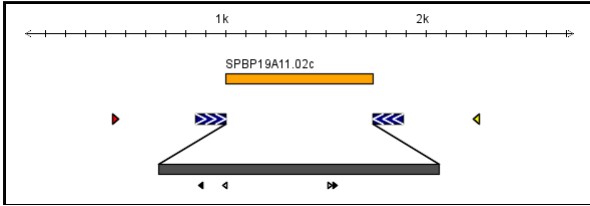

SPBP22H7.02c

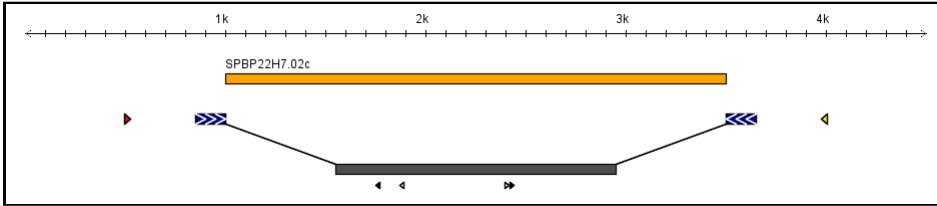

SPBP22H7.03

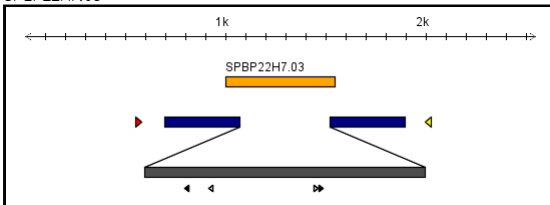

SPBP22H7.04

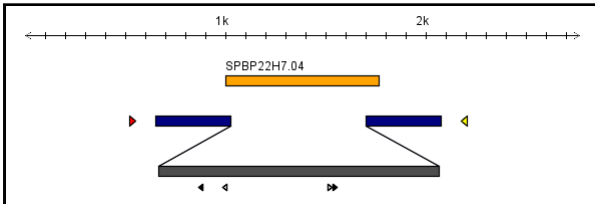

SPBP22H7.06

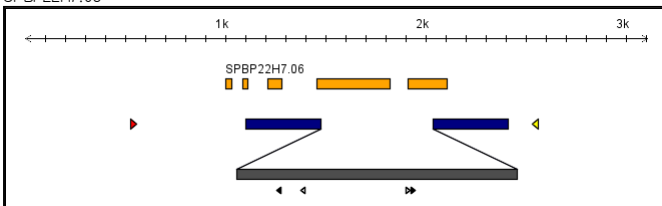

SPBP22H7.07

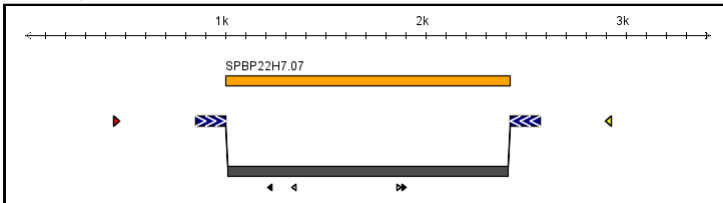

SPBP22H7.08

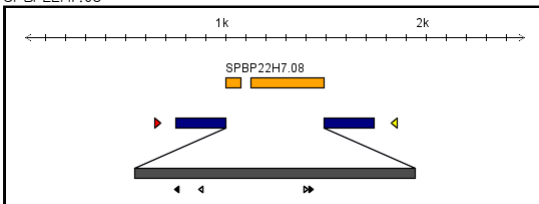

SPBP22H7.09c

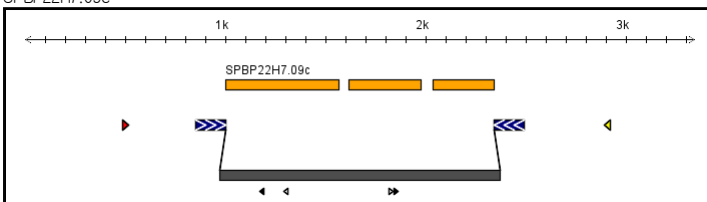

SPBP23A10.02

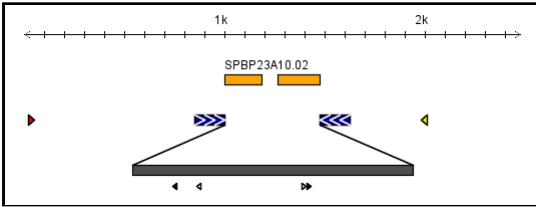

SPBP23A10.03c

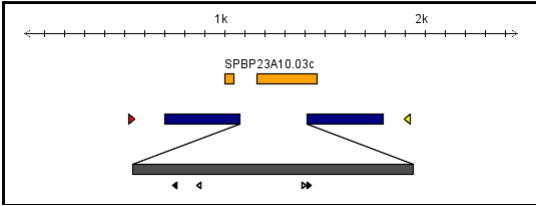

SPBP23A10.04

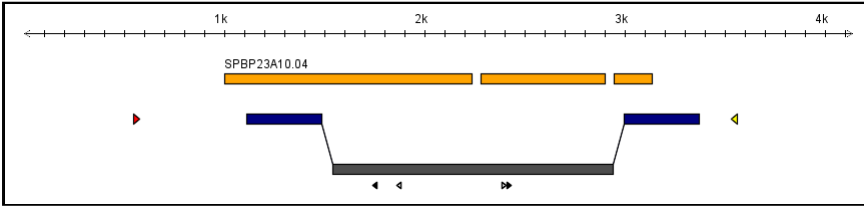

SPBP23A10.05

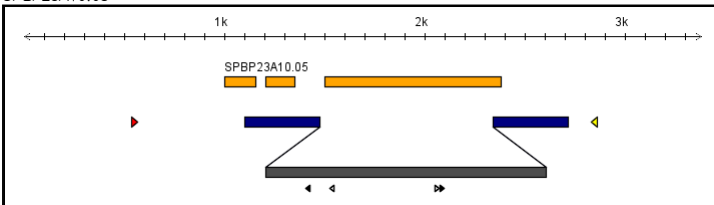

SPBP23A10.06

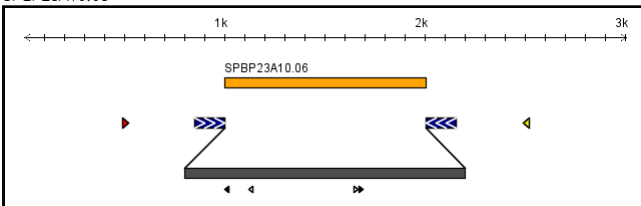

SPBP23A10.08

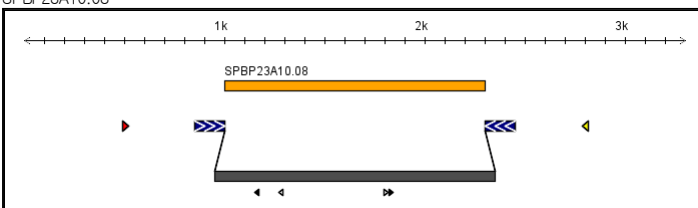

SPBP23A10.09

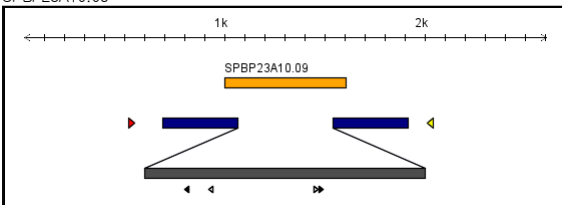

SPBP23A10.10

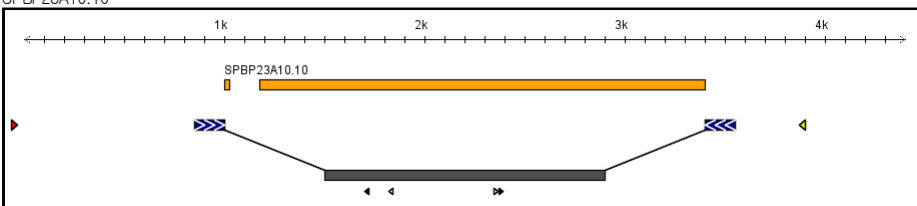

SPBP23A10.12

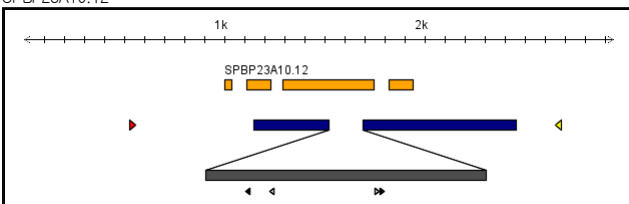



SPBP23A10.14c

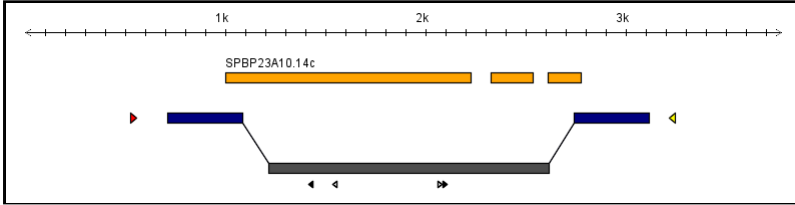

SPBP23A10.15c

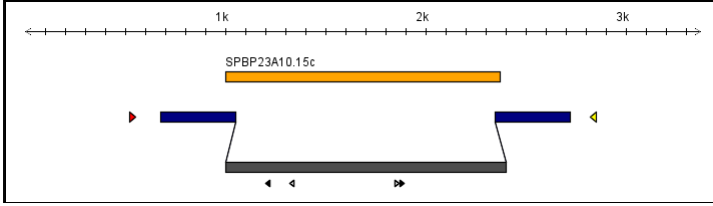

SPBP23A10.16

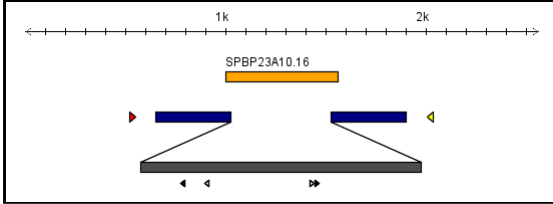

SPBP26C9.02c

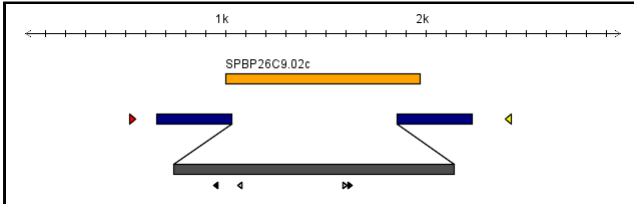

SPBP26C9.03c

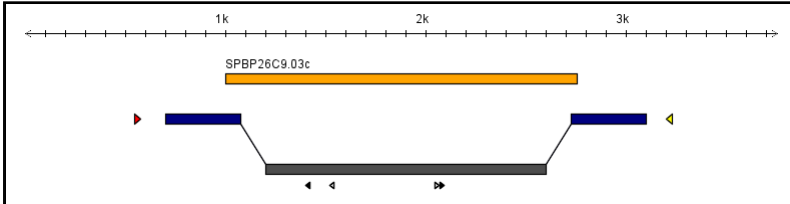

SPBP35G2.02

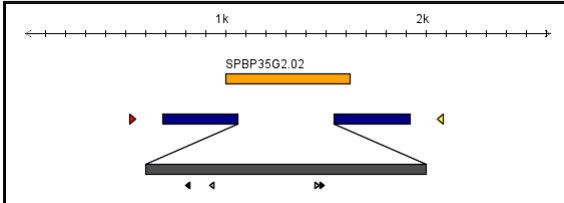

SPBP35G2.03c

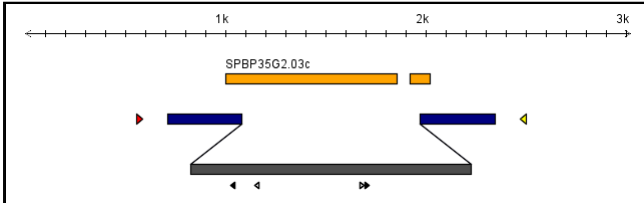

SPBP35G2.04c

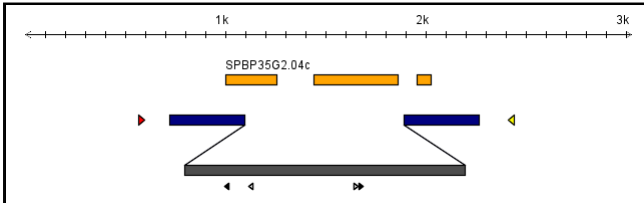

SPBP35G2.05c

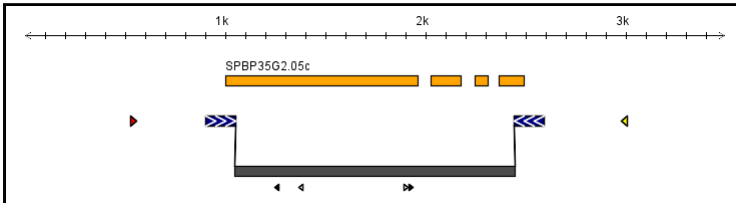

SPBP35G2.07

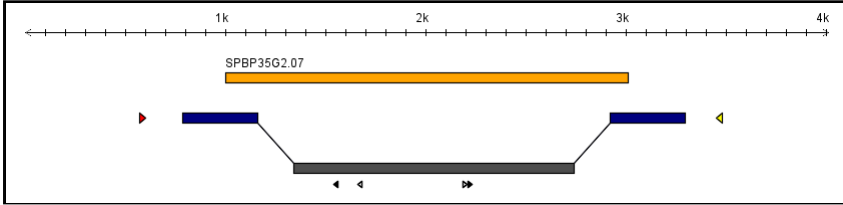

SPBP35G2.08c

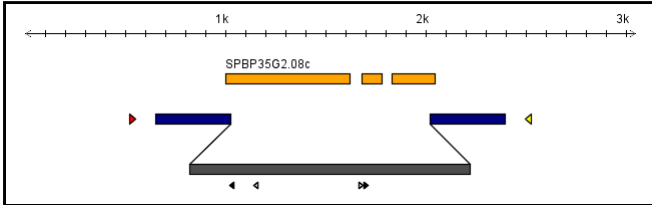

SPBP35G2.09

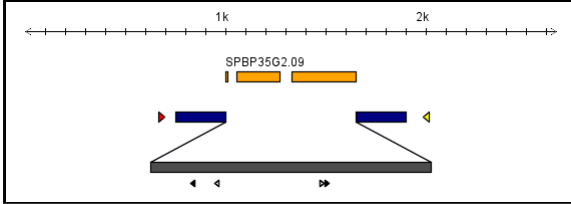

SPBP35G2.11c

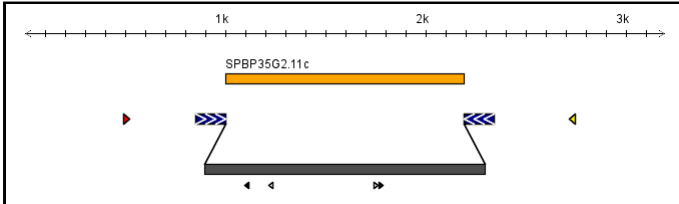

SPBP35G2.12

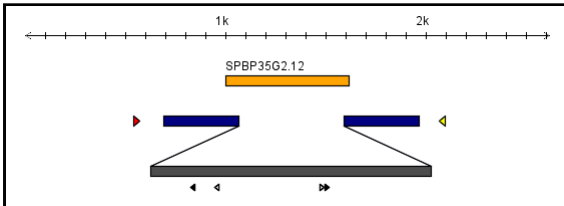

SPBP35G2.13c

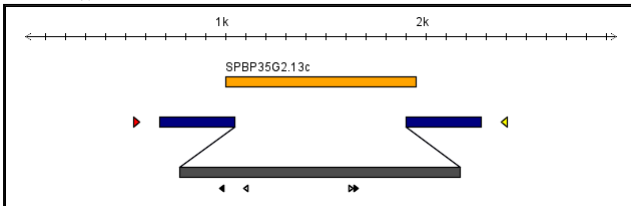

SPBP4G3.02

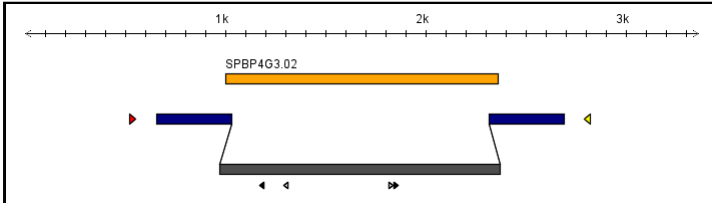

SPBP4G3.03

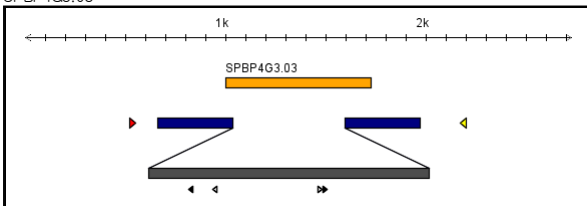

SPBP4H10.03

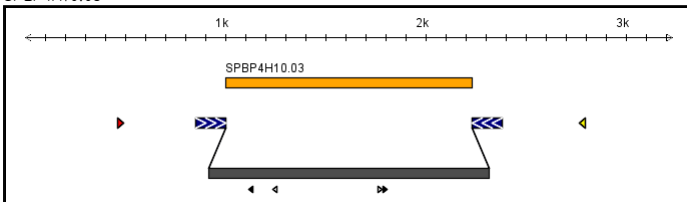

SPBP4H10.04

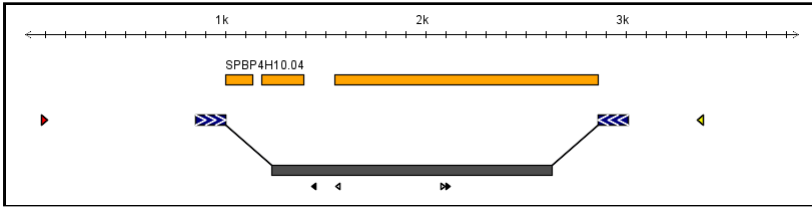

SPBP4H10.05c

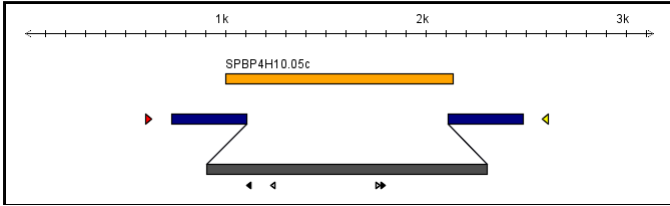

SPBP4H10.07

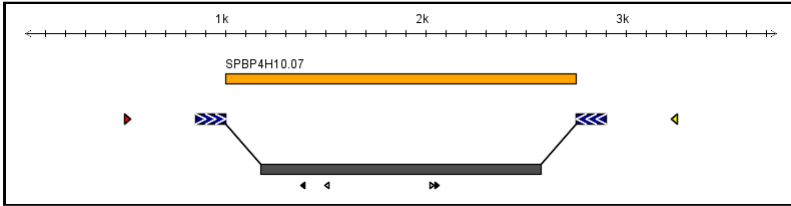

SPBP4H10.08

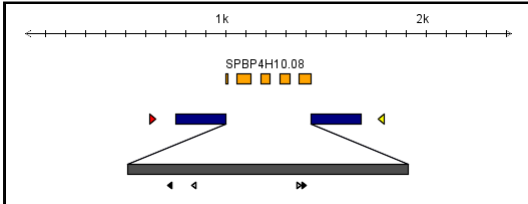

SPBP4H10.09

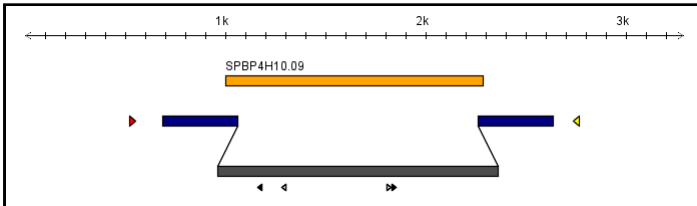

SPBP4H10.10

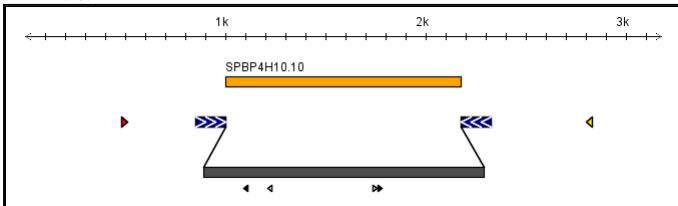

SPBP4H10.11c

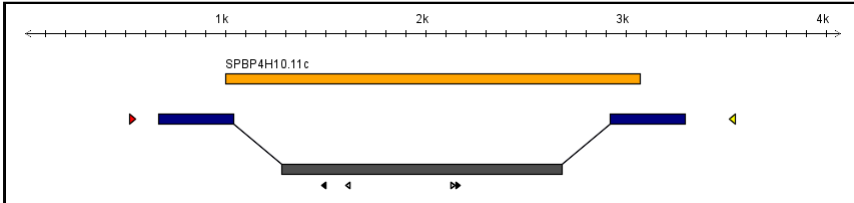

SPBP4H10.12

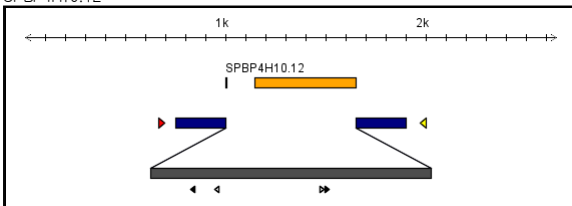

SPBP4H10.13

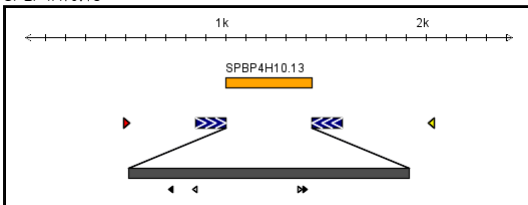

SPBP4H10.14c

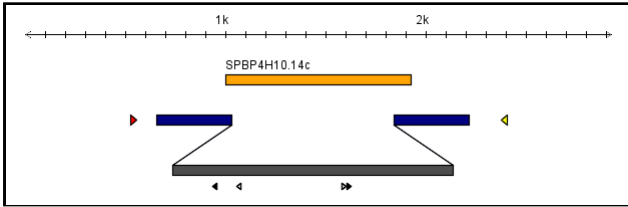

SPBP4H10.16c

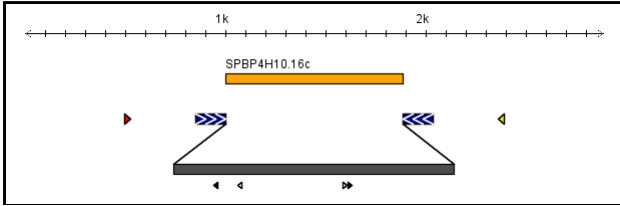

SPBP4H10.17c

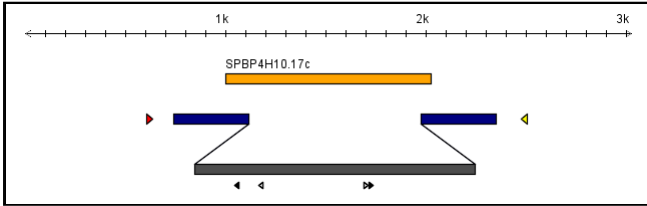

SPBP4H10.18c

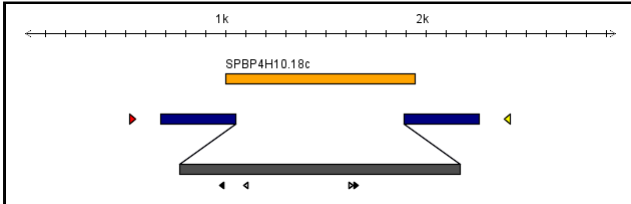

SPBP4H10.19c

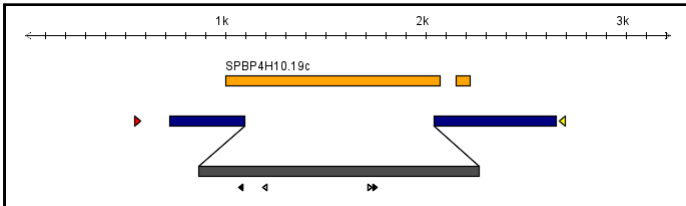

SPBP4H10.20

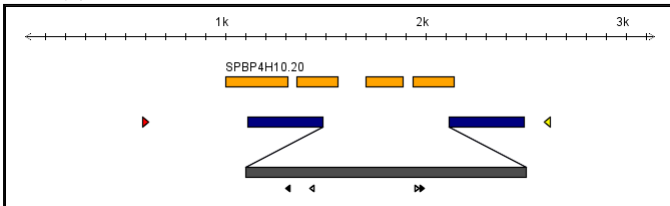

SPBP4H10.21c

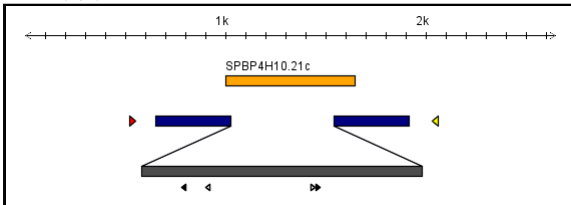

SPBP8B7.01c

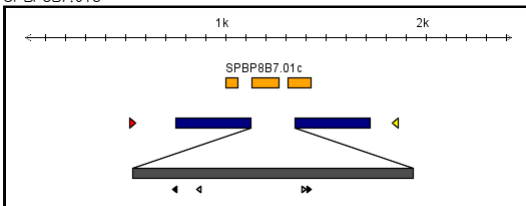

SPBP8B7.02

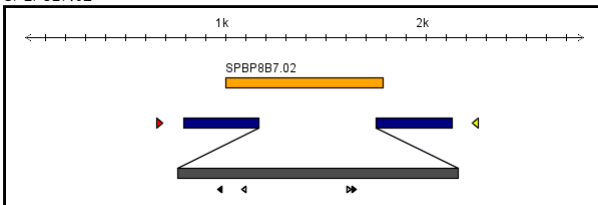

SPBP8B7.03c

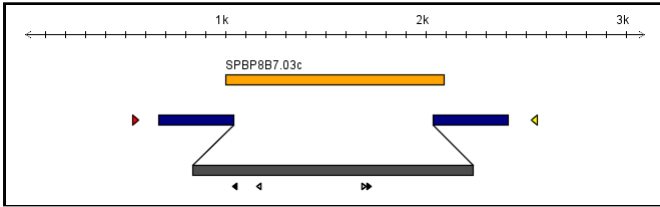

SPBP8B7.04

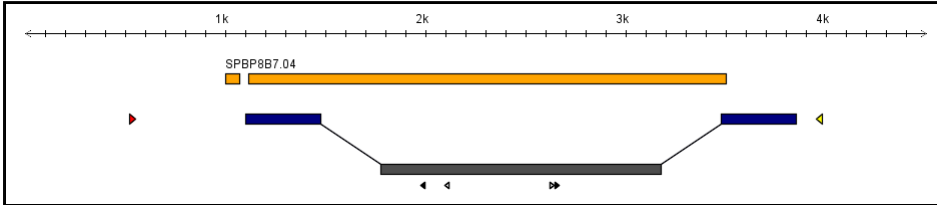

SPBP8B7.05c

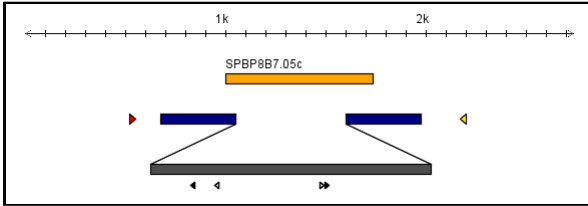

SPBP8B7.06

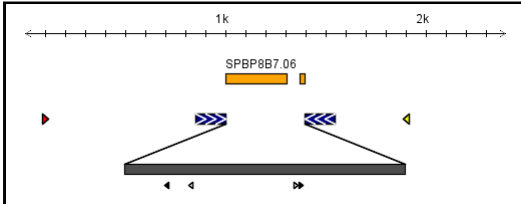

SPBP8B7.07c

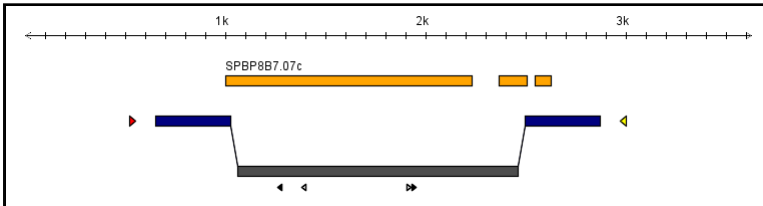

SPBP8B7.08c

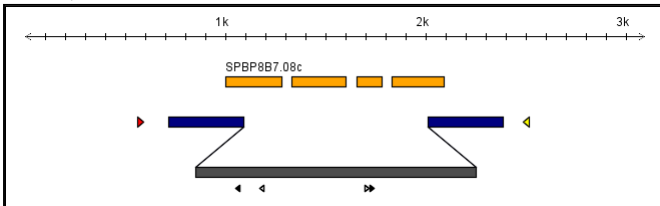

SPBP8B7.10c

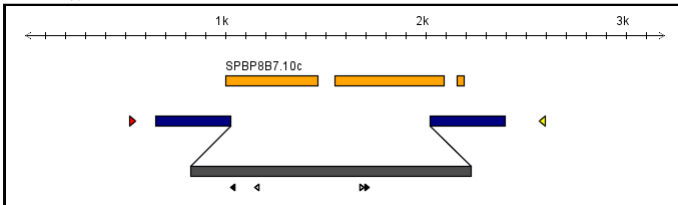

SPBP8B7.11

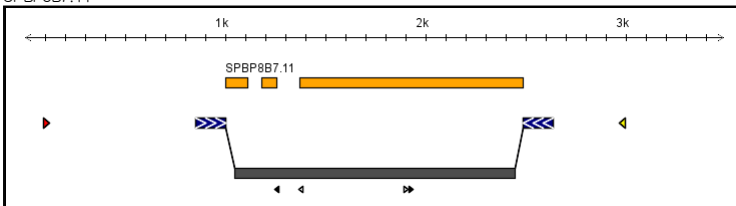

SPBP8B7.12c

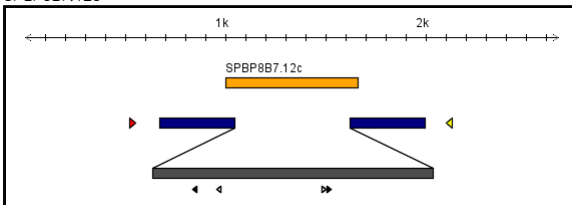

SPBP8B7.13

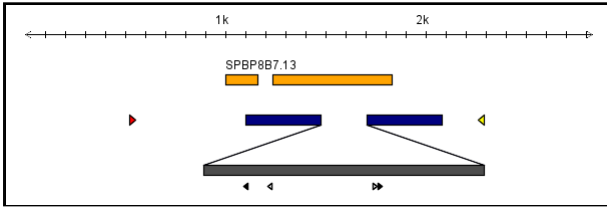

SPBP8B7.14c

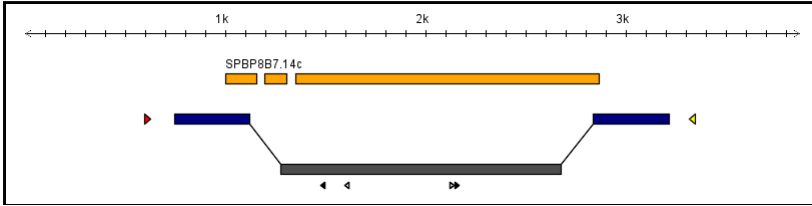

SPBP8B7.15c

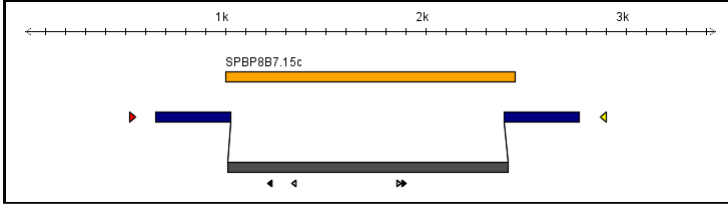

SPBP8B7.17c

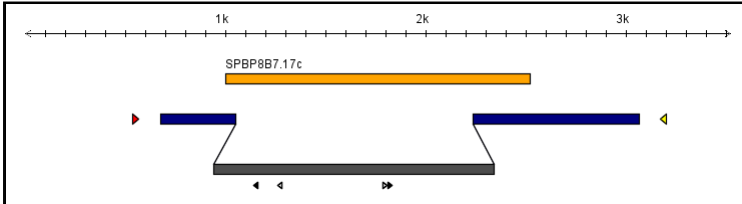

SPBP8B7.18c

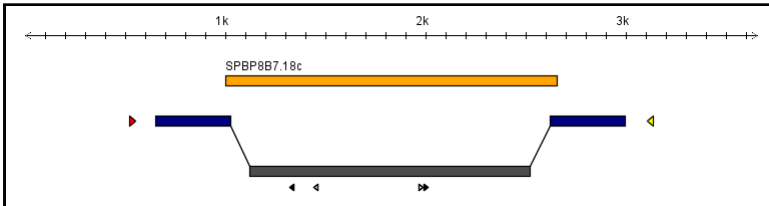

SPBP8B7.20c

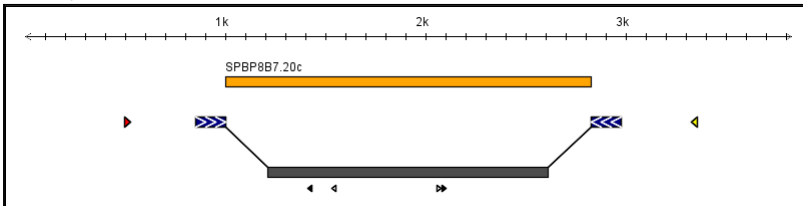

SPBP8B7.21

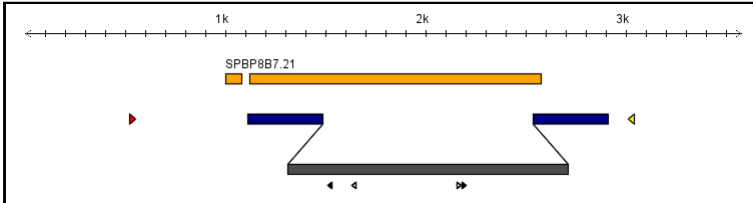

SPBP8B7.22

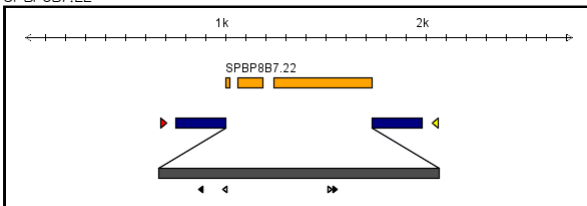

SPBP8B7.23

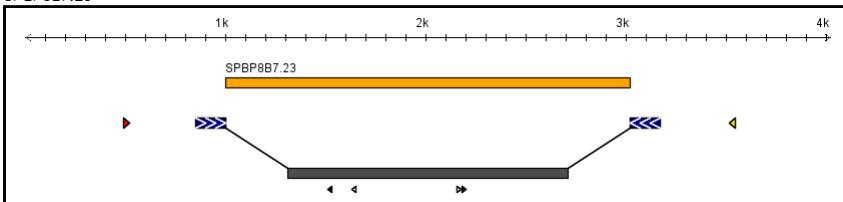

SPBP8B7.24c

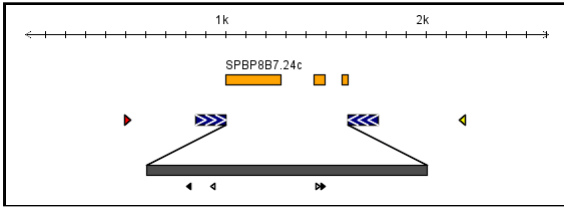

SPBP8B7.25

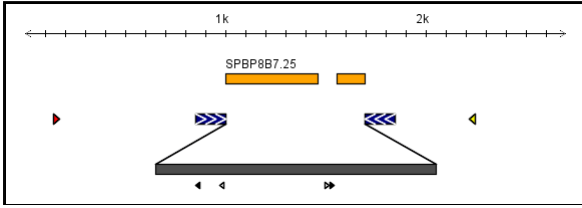

SPBP8B7.26

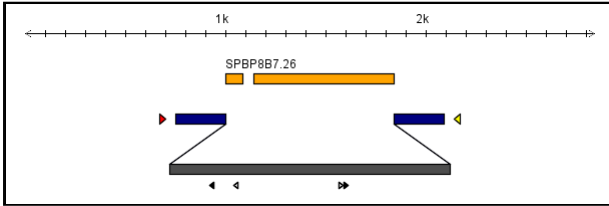

SPBP8B7.27

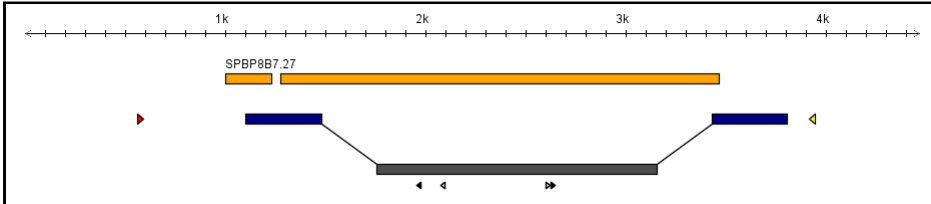

SPBP8B7.28c

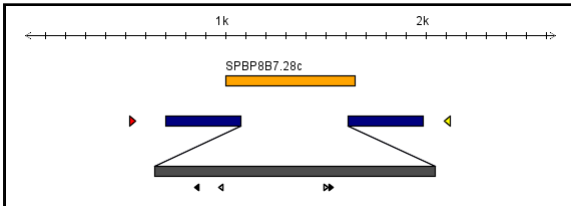

SPBP8B7.29

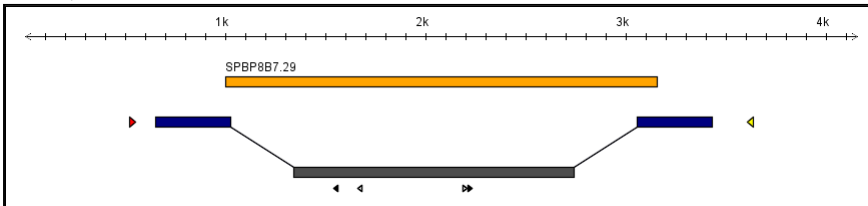

SPBP8B7.31

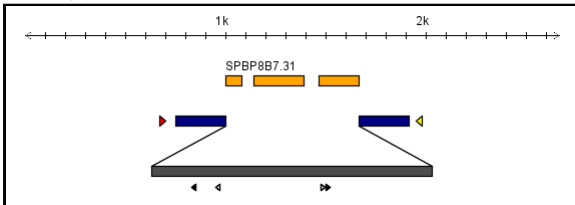

SPBPB10D8.01

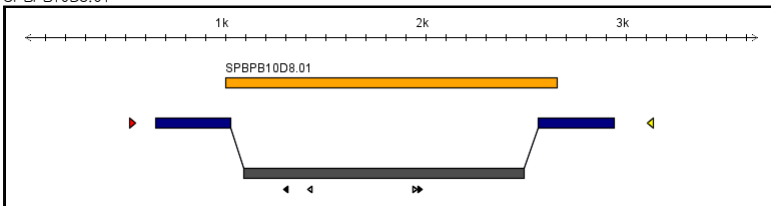

SPBPB10D8.02c

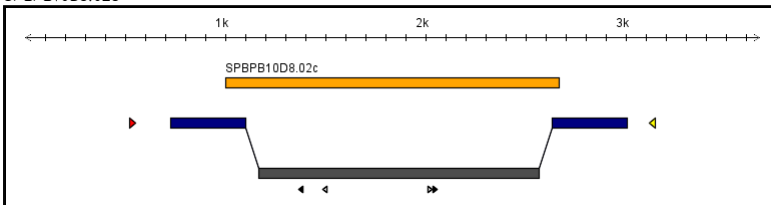

SPBPB10D8.04c

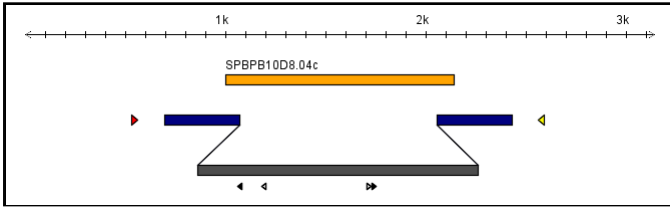

SPBPB10D8.05c

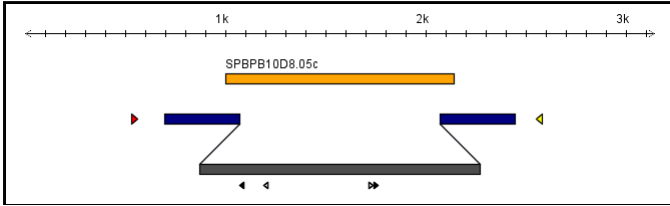

SPBPB10D8.06c

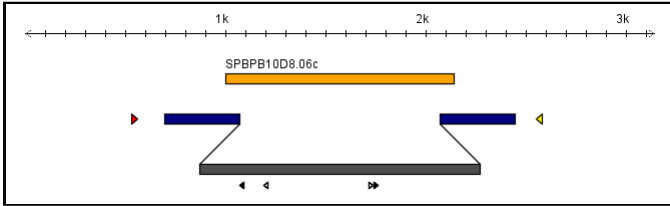

SPBPB10D8.07c

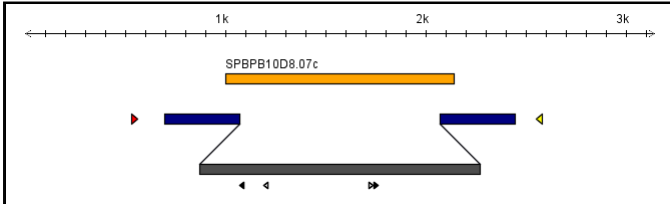

SPBPB21E7.01c

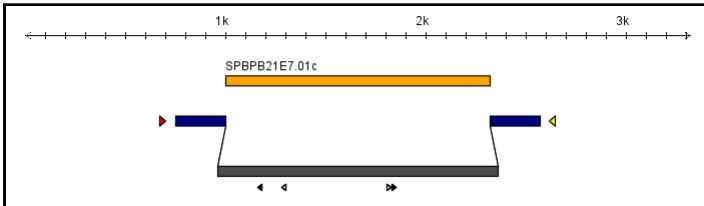

SPBPB21E7.04c

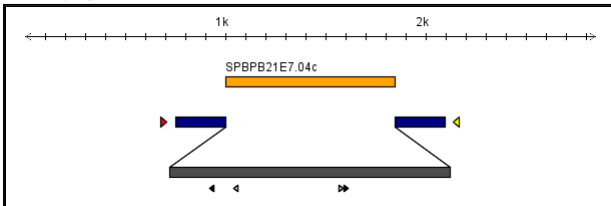

SPBPB21E7.05

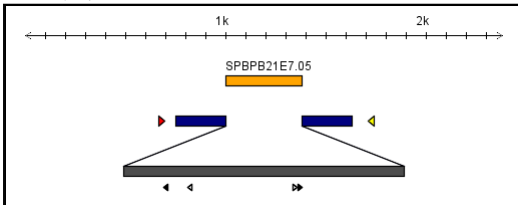

SPBPB21E7.09

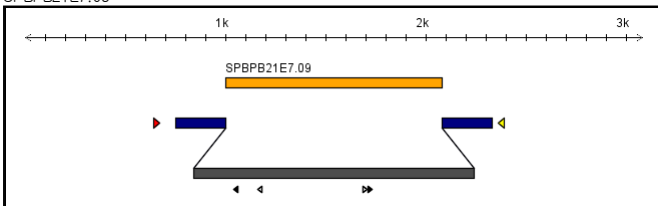

SPBPB2B2.01

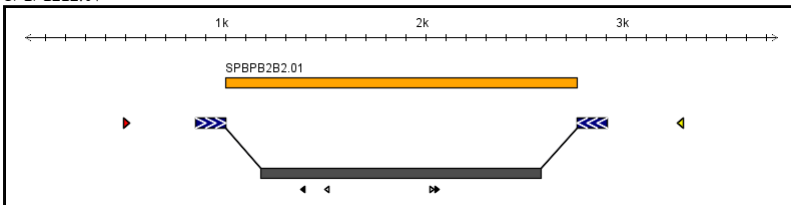



SPBPB2B2.02

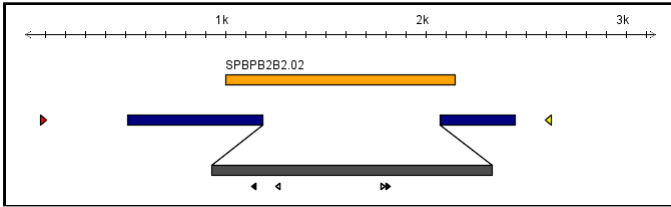

SPBPB2B2.05

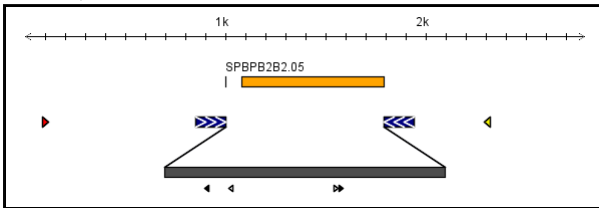

SPBPB2B2.06c

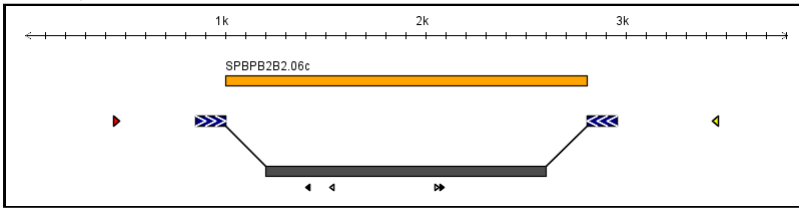

SPBPB2B2.07c

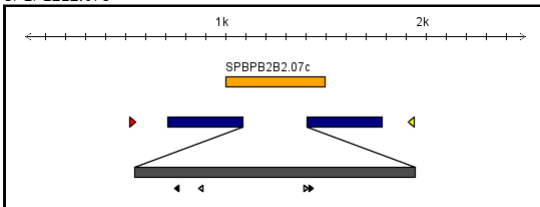

SPBPB2B2.08

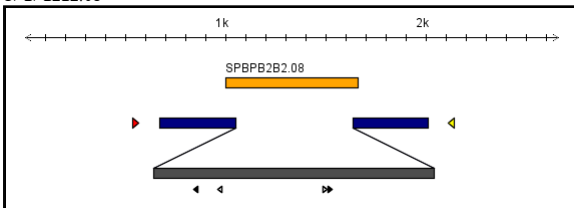

SPBPB2B2.09c

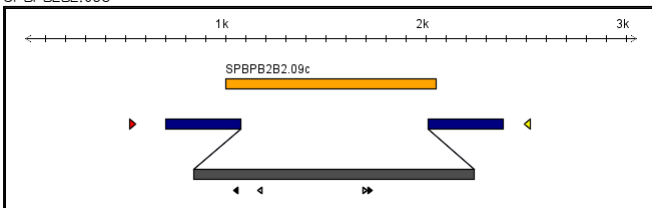

SPBPB2B2.10c

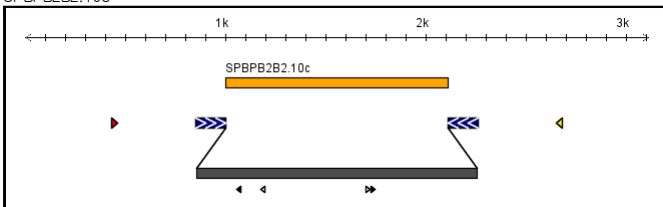

SPBPB2B2.11

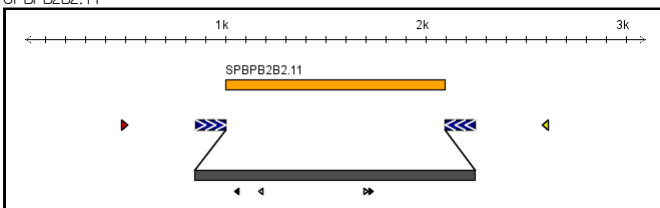

SPBPB2B2.12c

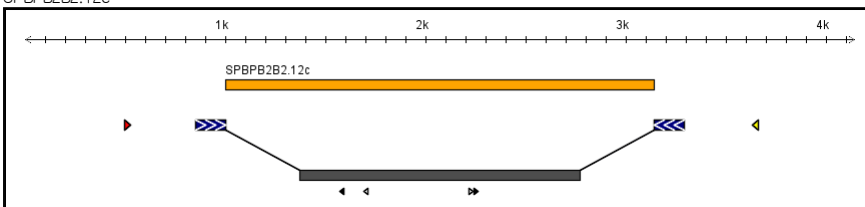

SPBPB2B2.13

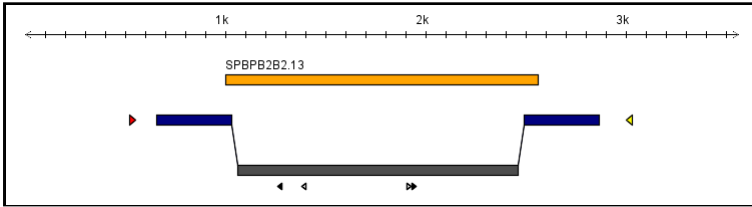

SPBPB2B2.14c

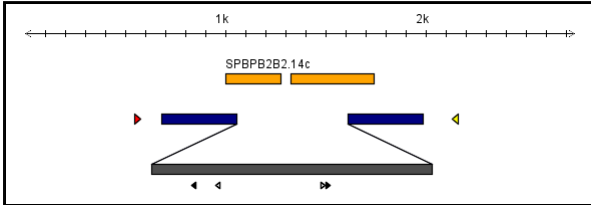

SPBPB2B2.15

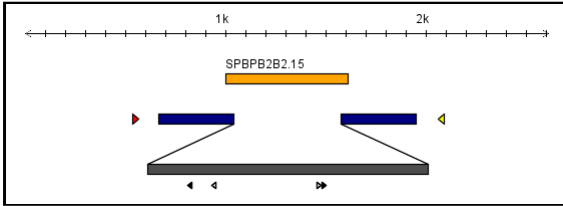

SPBPB2B2.16c

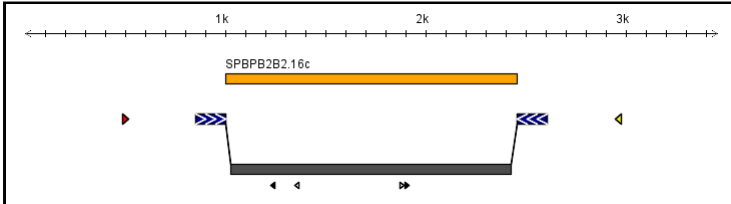

SPBPB2B2.18

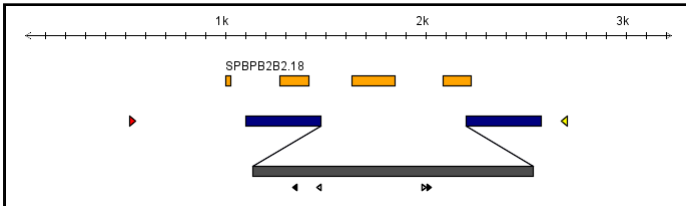

SPBPB2B2.19c

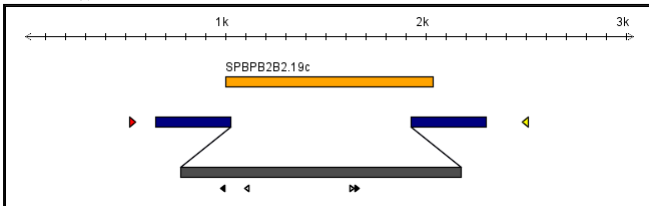

SPBPB7E8.01

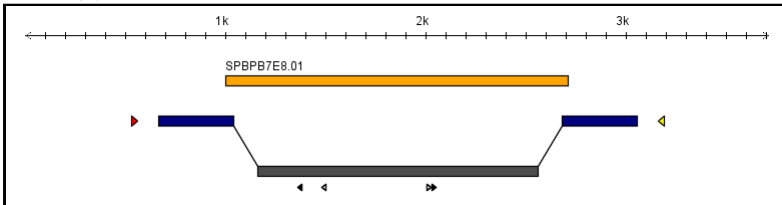

SPBPB7E8.02

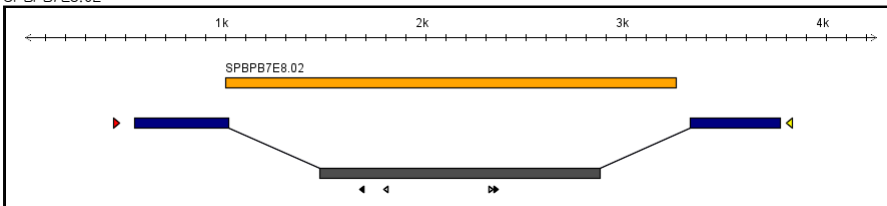

SPBPB8B6.04c

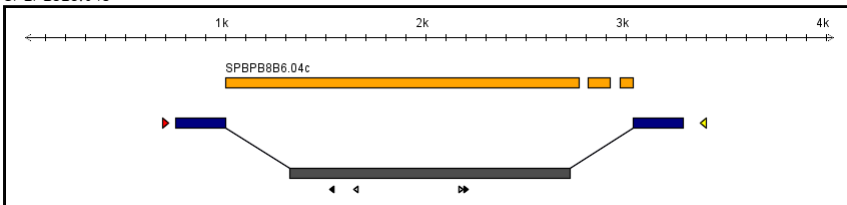

SPBPB8B6.05c

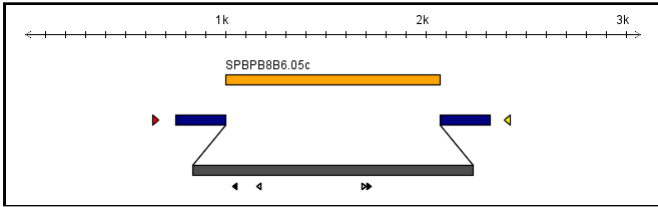

SPBPJ4664.01

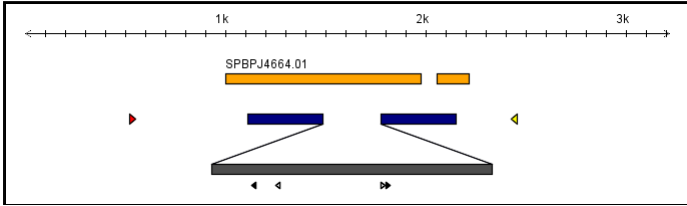

SPBPJ4664.03

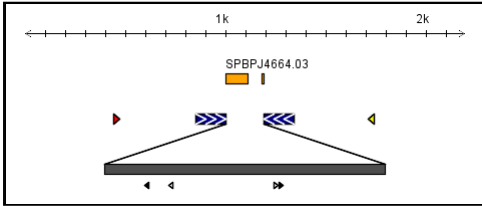

SPBPJ4664.05

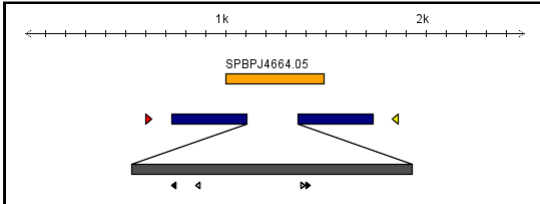

SPCC2H8.02

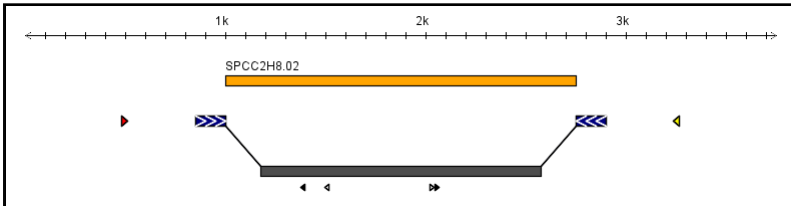

SPCC2H8.04

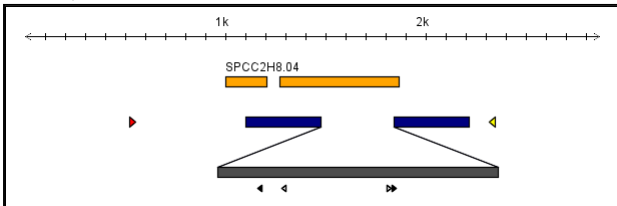

SPCC2H8.05c

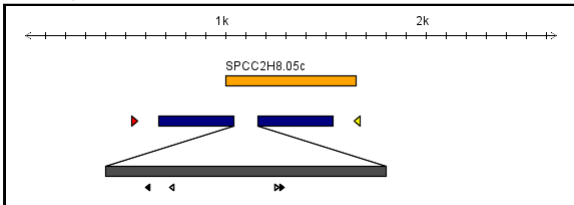

SPCC4B3.02c

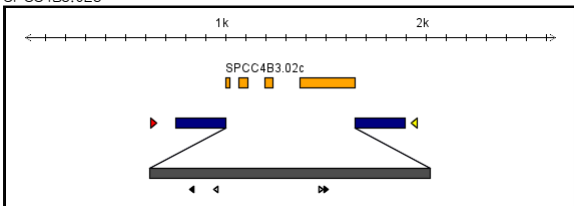

SPCC4B3.03c

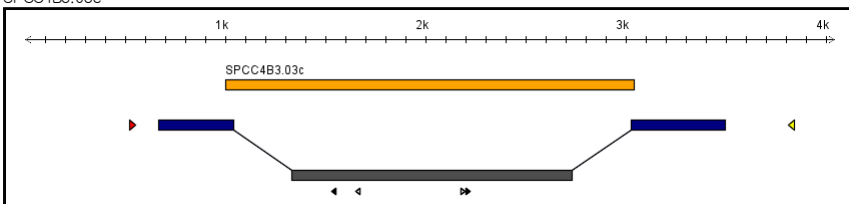

SPCC4B3.05c

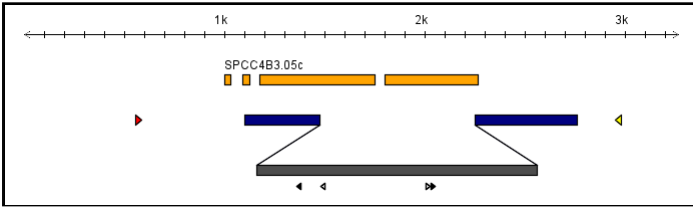

SPCC4B3.06c

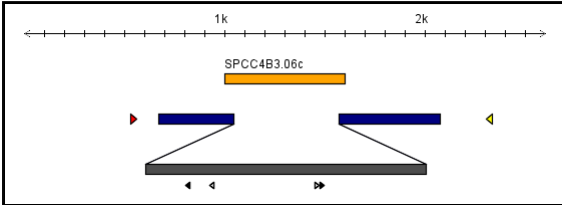

SPCC4B3.07

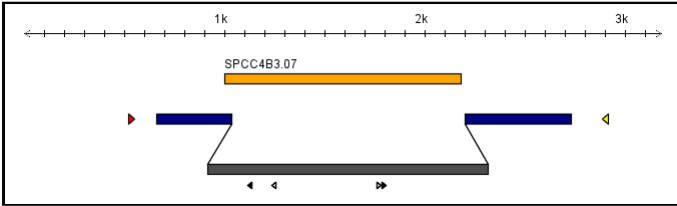

SPCC4B3.08

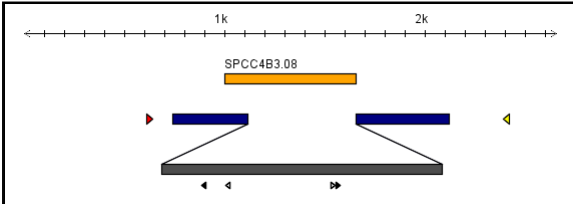

SPCC4B3.09c

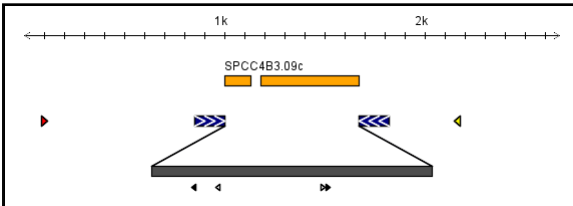

SPCC4B3.10c

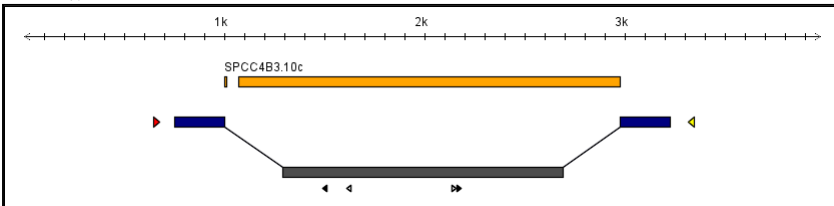

SPCC4B3.11c

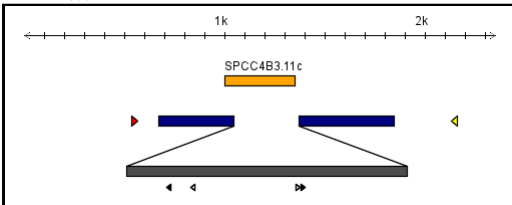

SPCC4B3.12

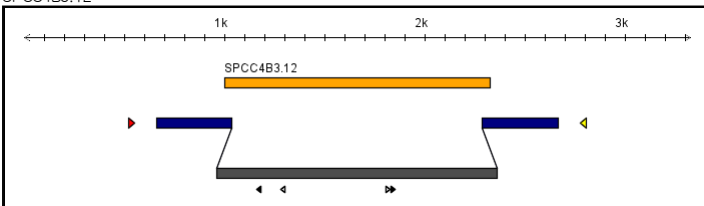

SPCC4B3.13

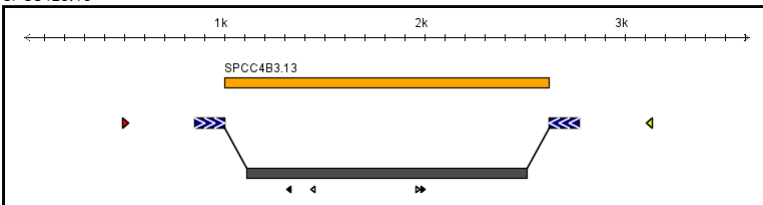

SPCC4B3.14

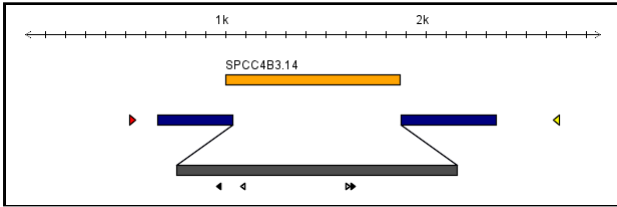

SPCC4B3.15

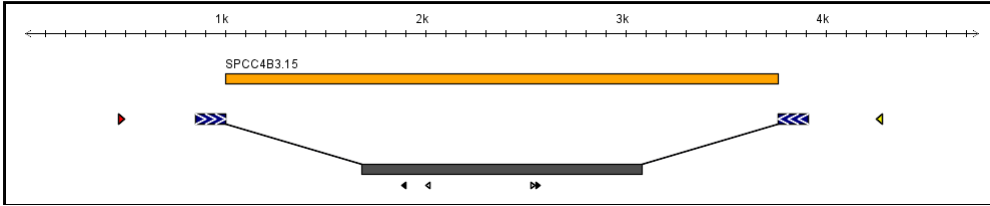

SPCC4B3.17

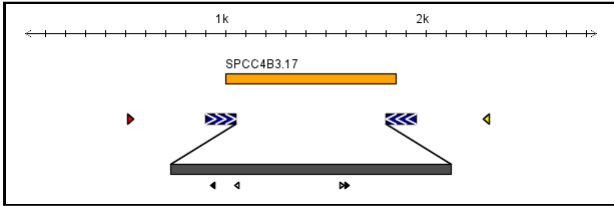

SPBC106.02c

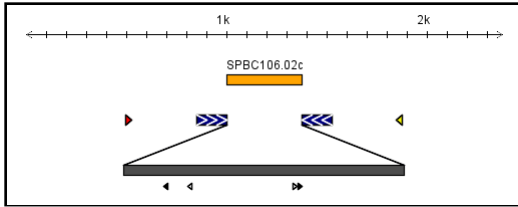

SPBC106.05c

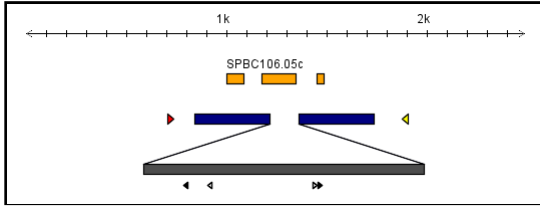

SPBC106.14c

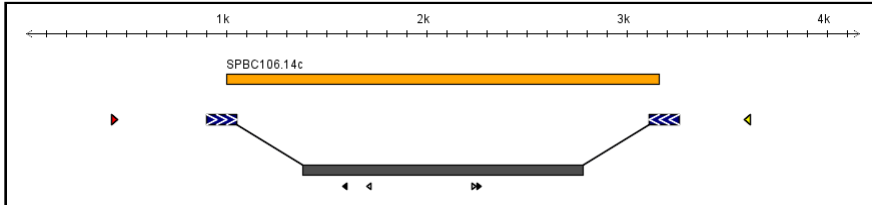

SPBC1105.03c

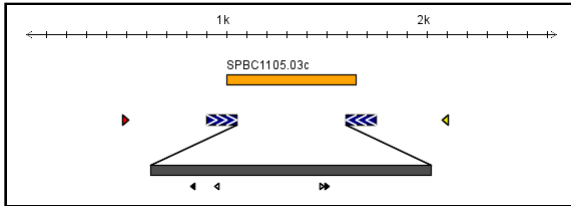

SPBC1105.08

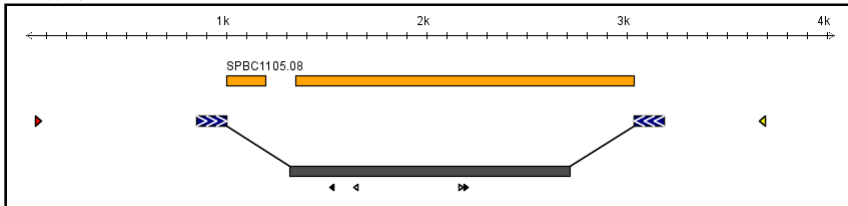

SPBC1105.10

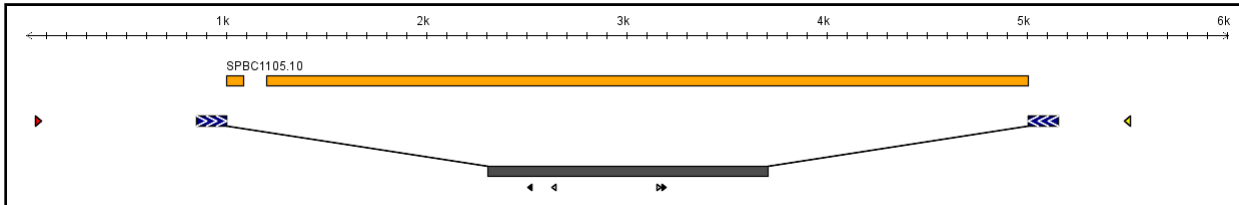

SPBC119.07

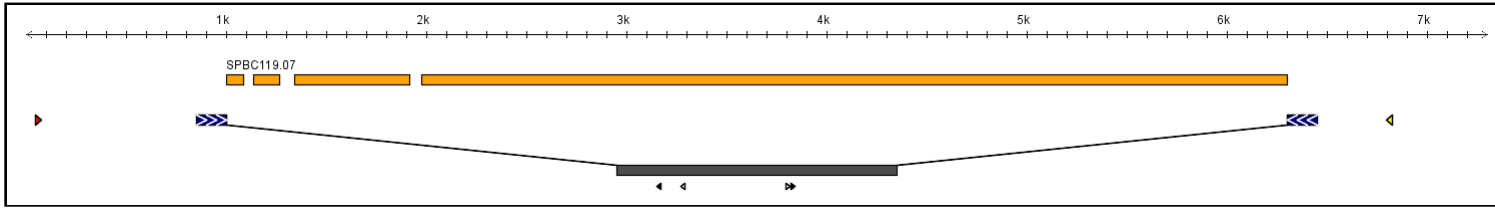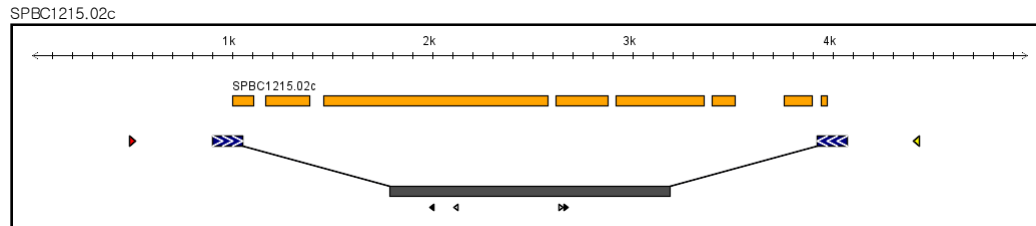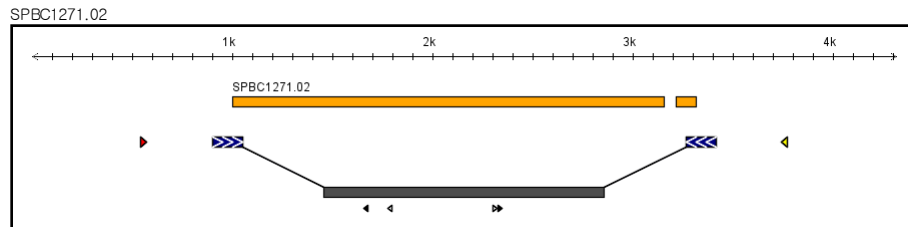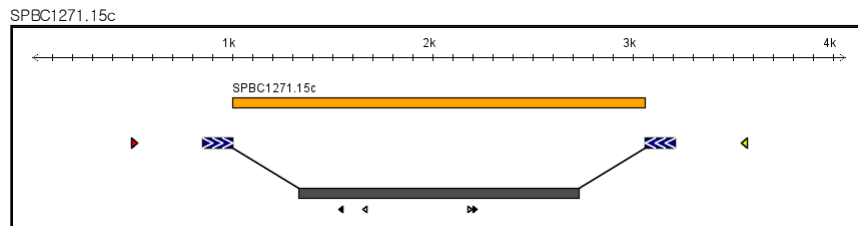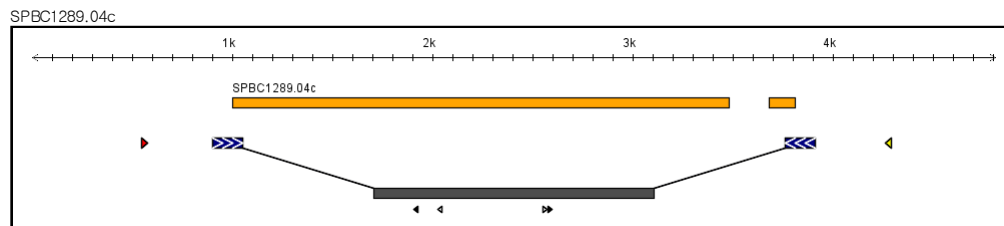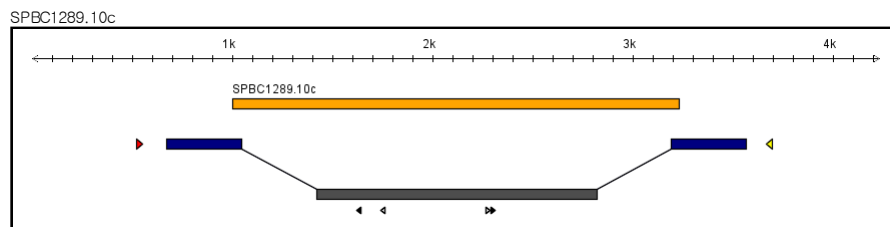

SPBC1289.15

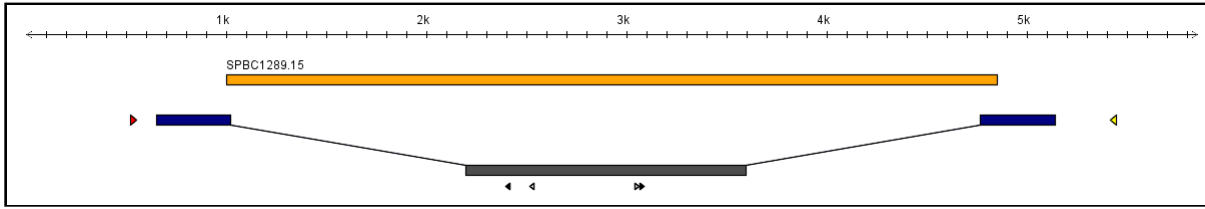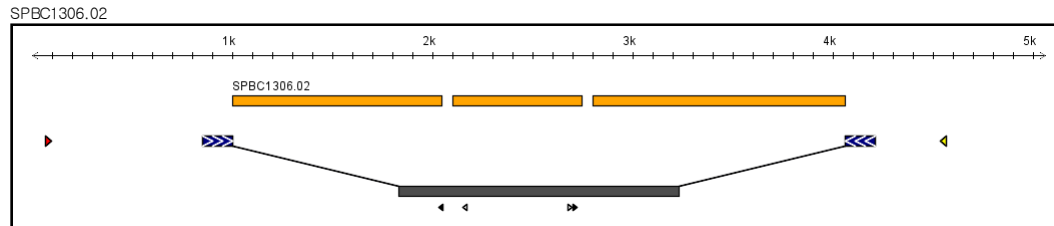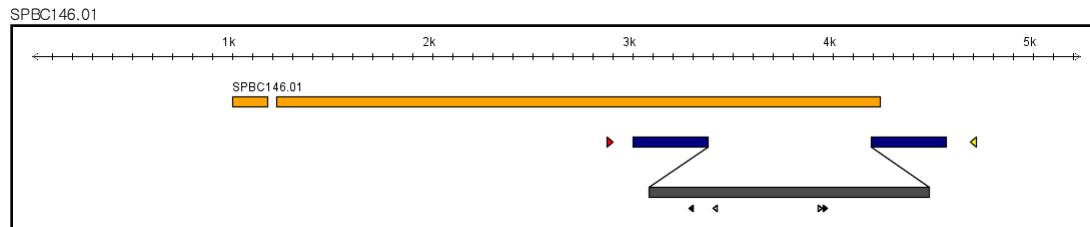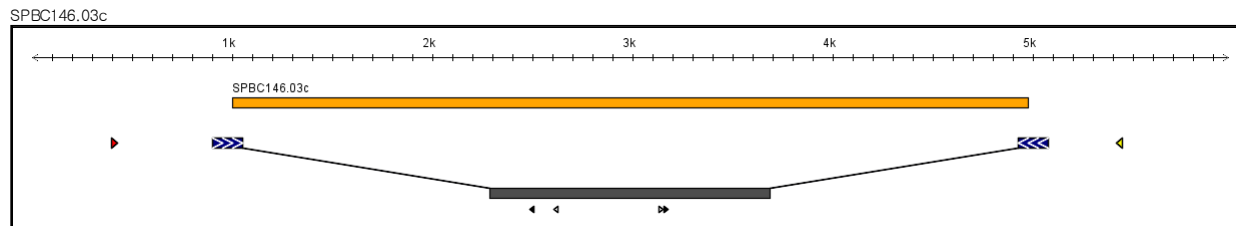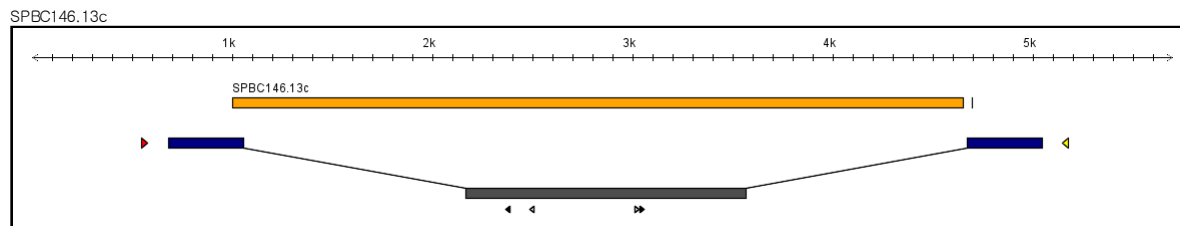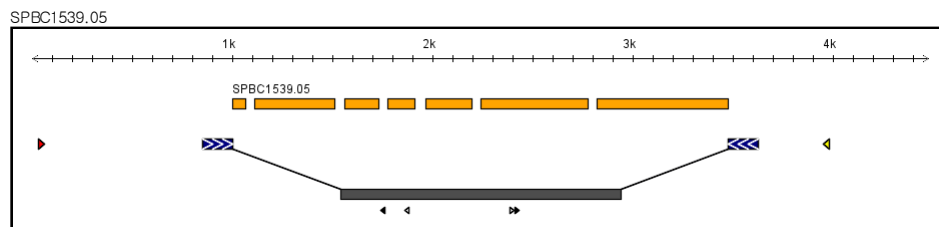

SPBC1539.09c



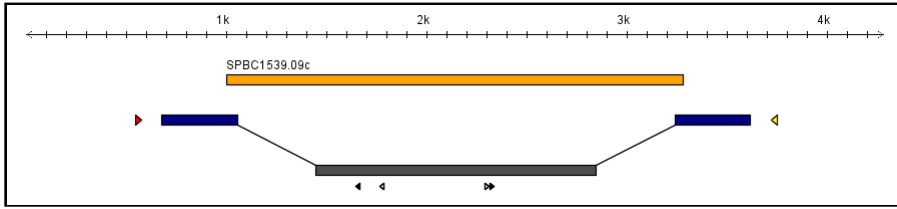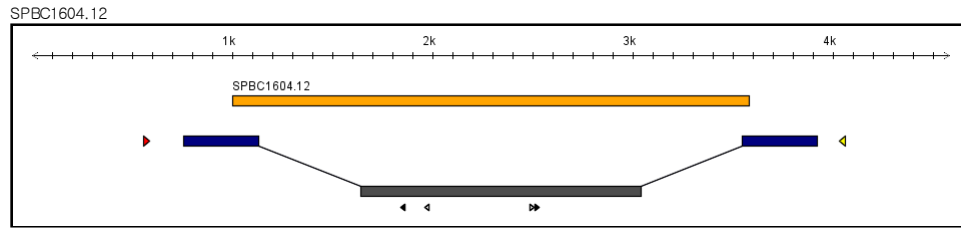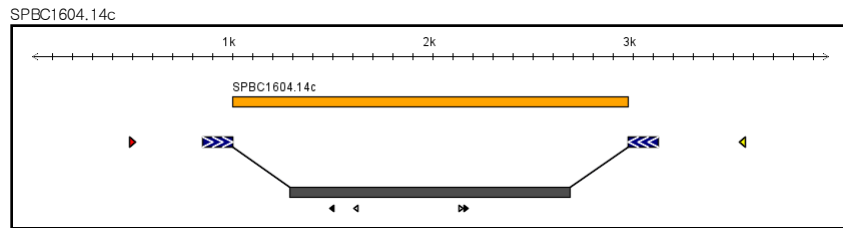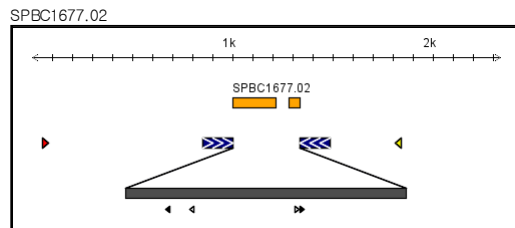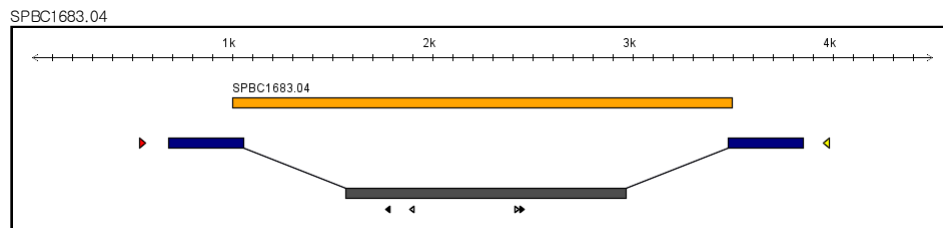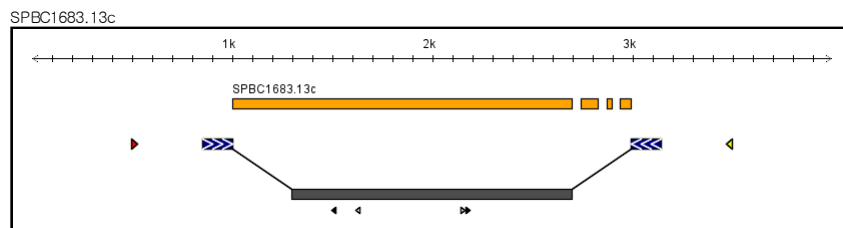

SPBC1685.03

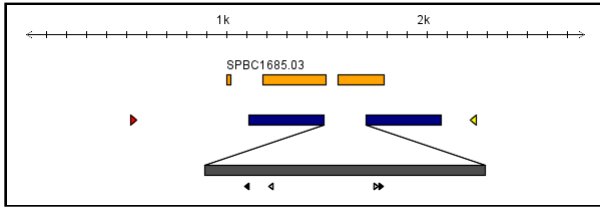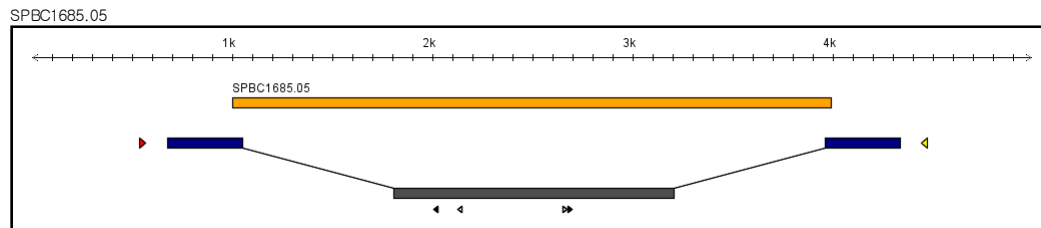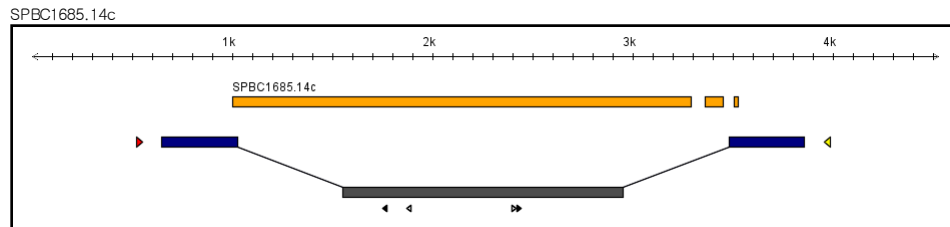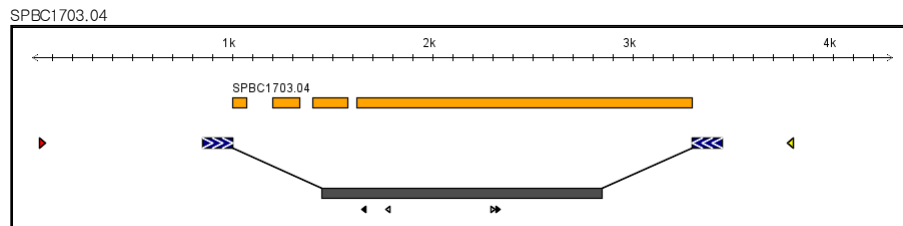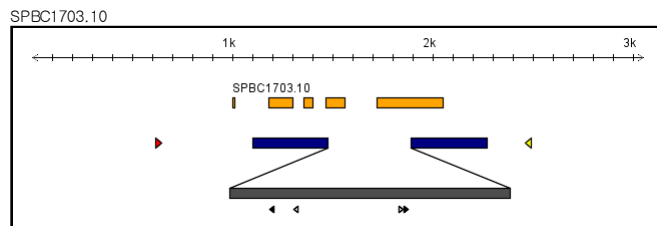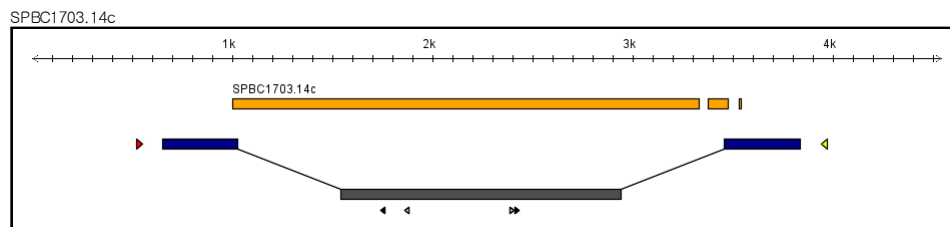

SPBC1703.15c

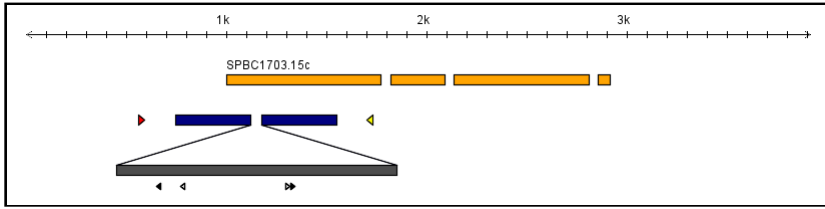

SPBC1706.01

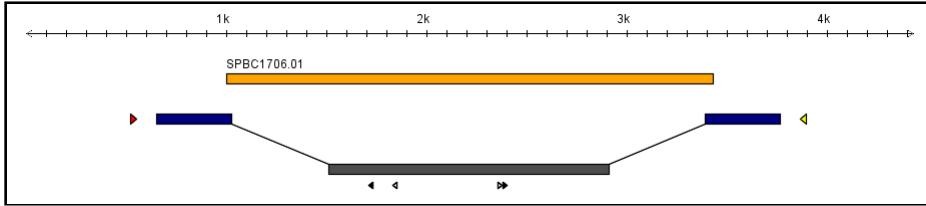

SPBC1706.03

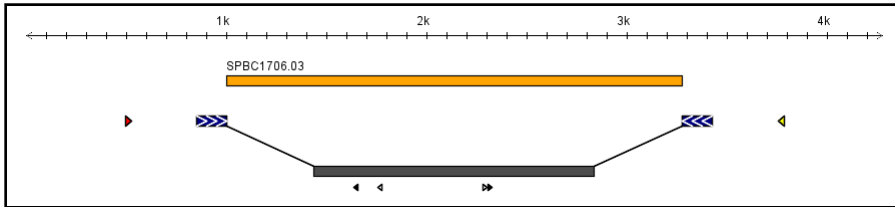

SPBC1709.02c

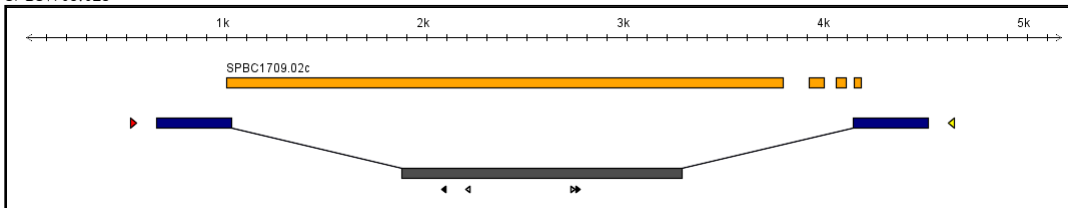

SPBC1709.08

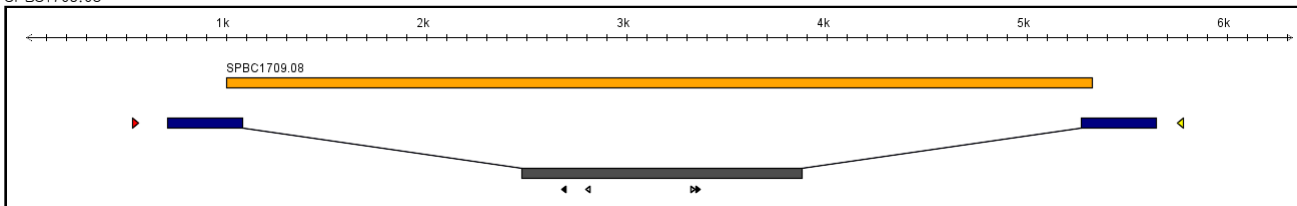

SPBC1709.15c

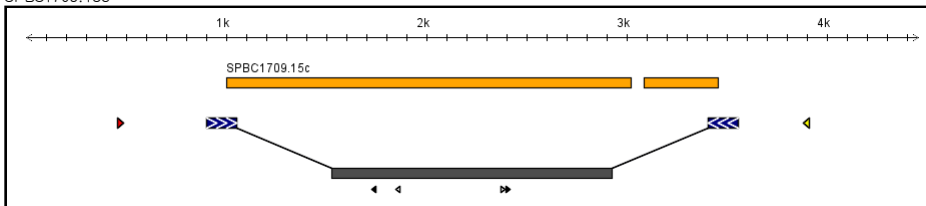

SPBC1711.17

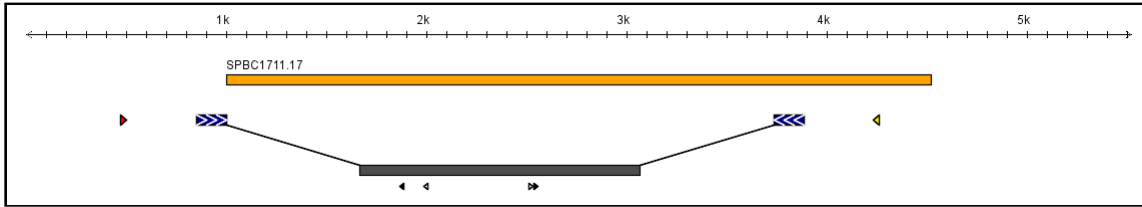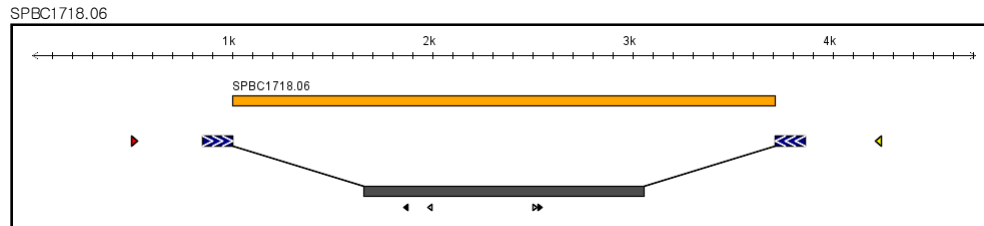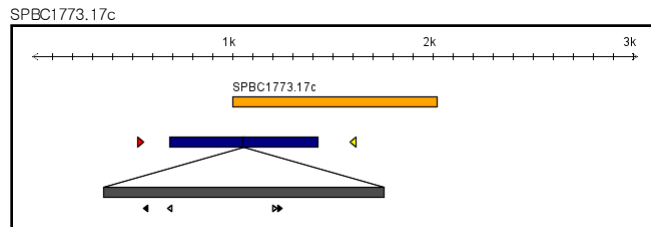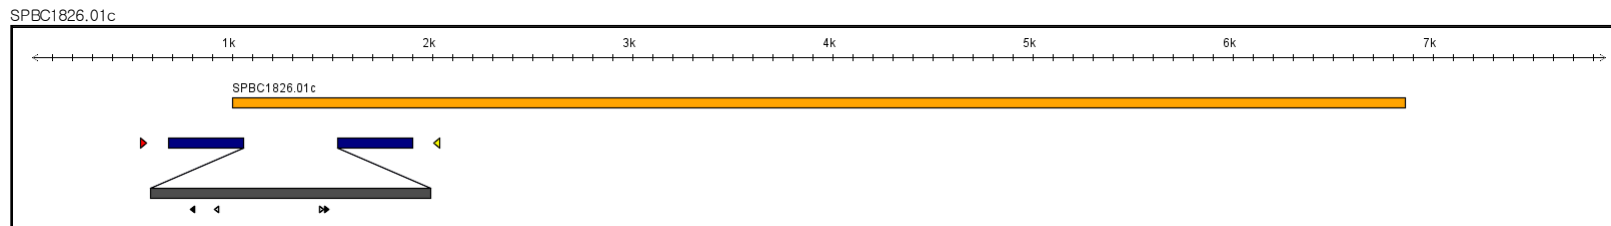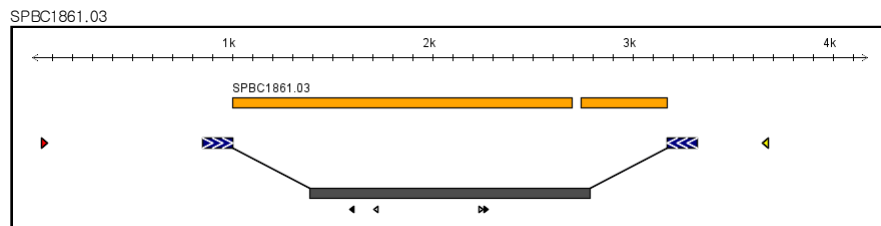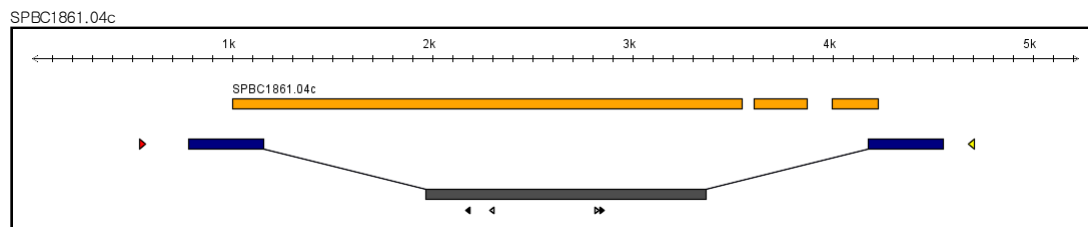

SPBC1861.05

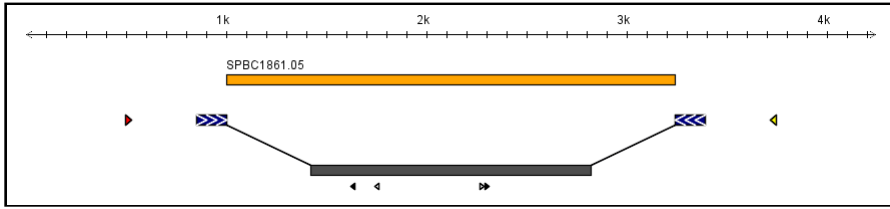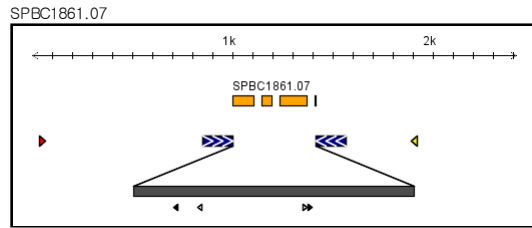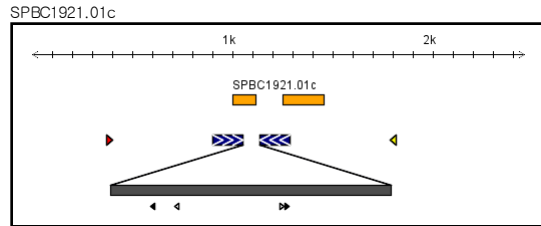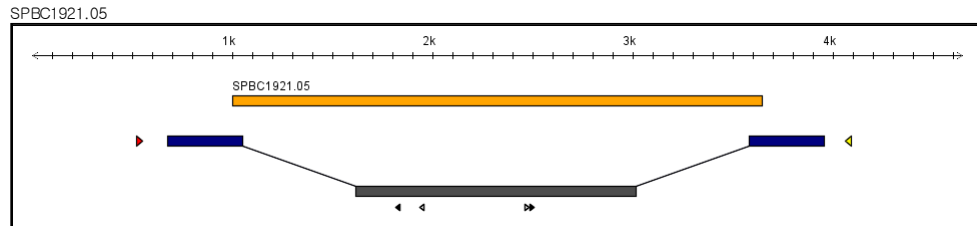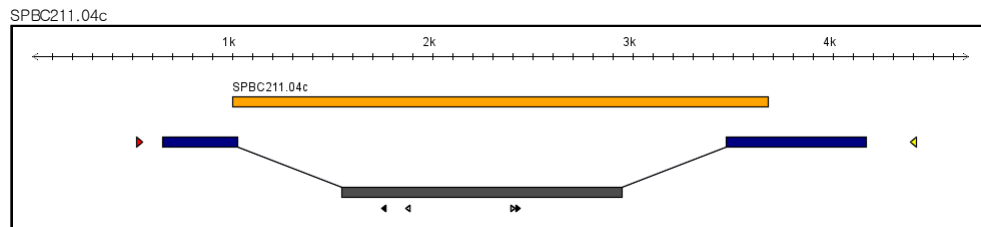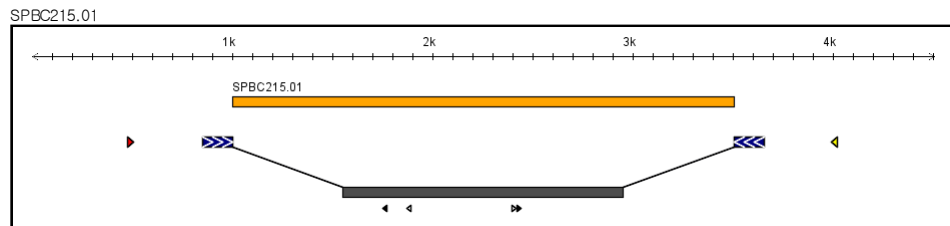

SPBC215.06c

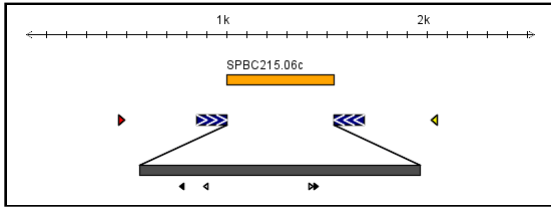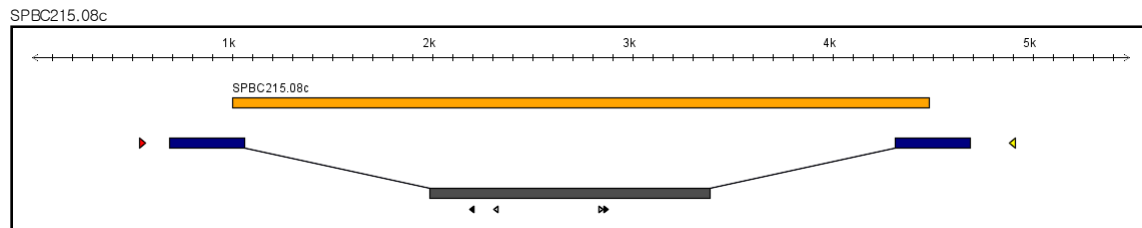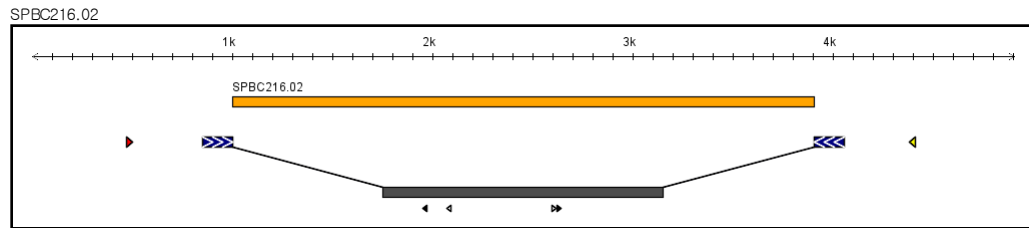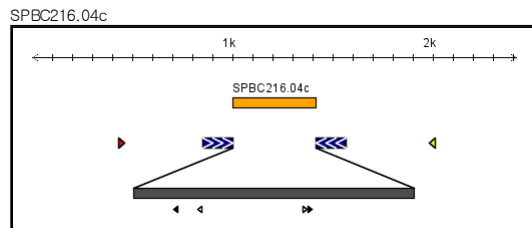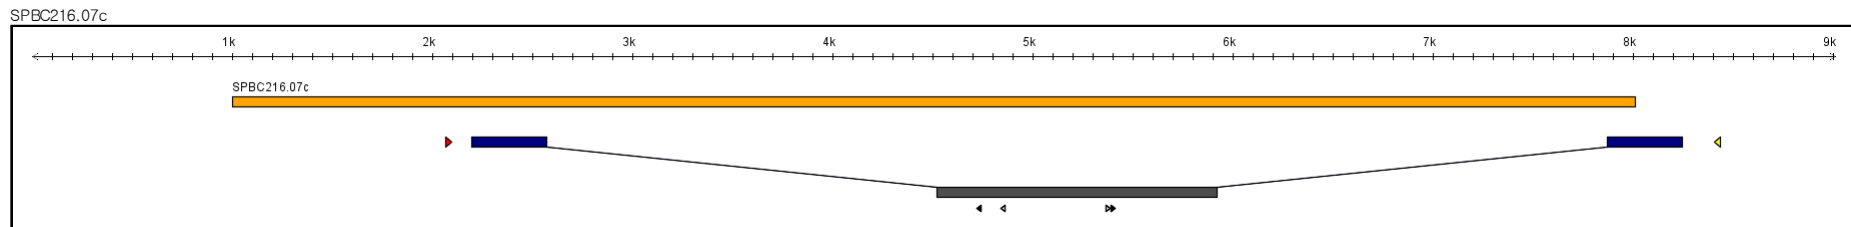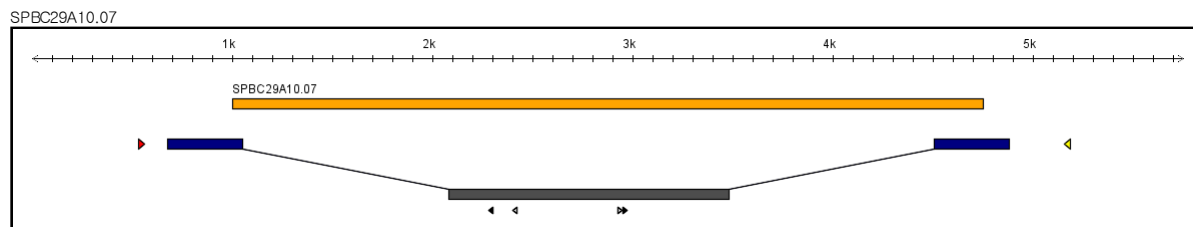

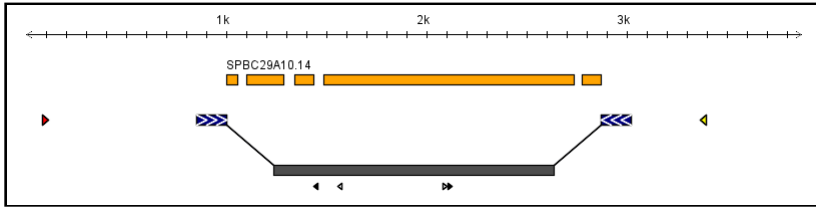

SPBC29B5.02c

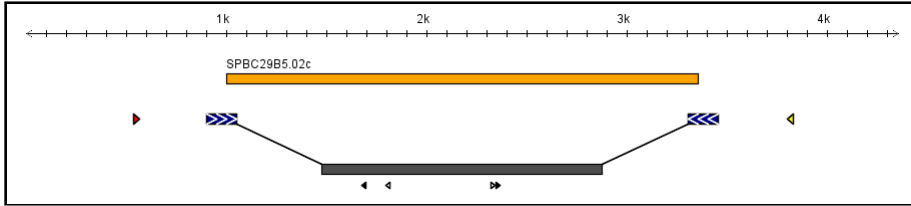

SPBC30B4.02c

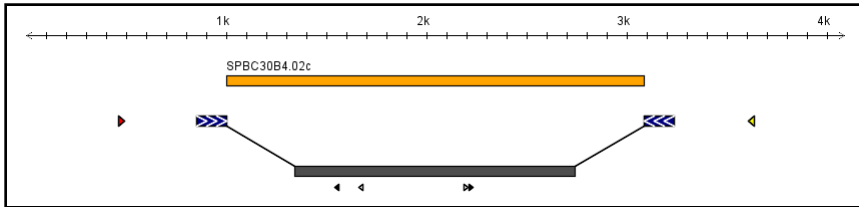

SPBC30B4.04c

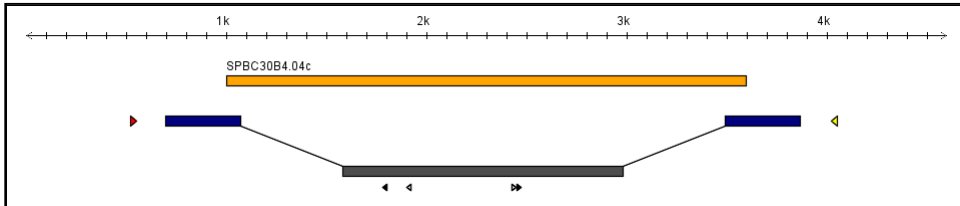

SPBC30B4.05

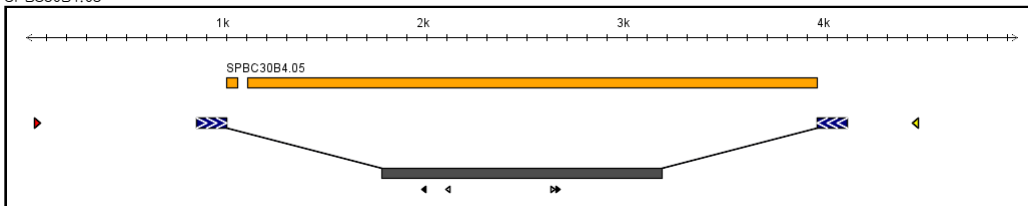

SPBC31E1.01c

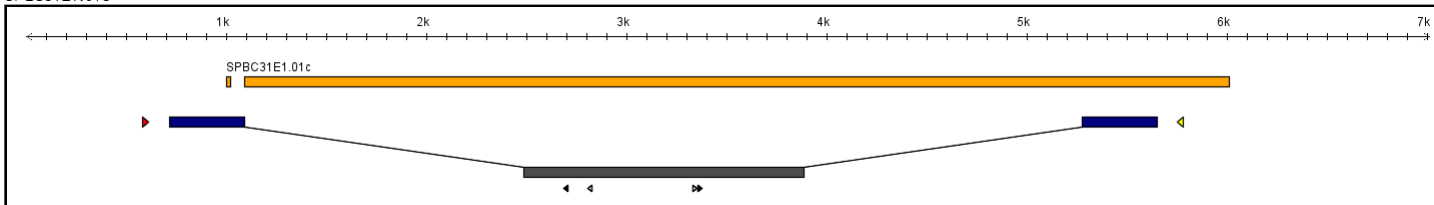

SPBC31E1.06

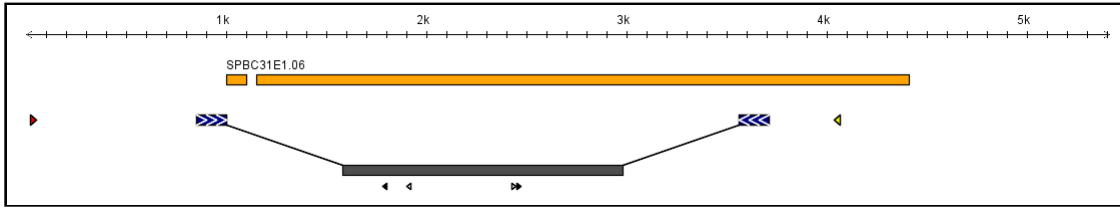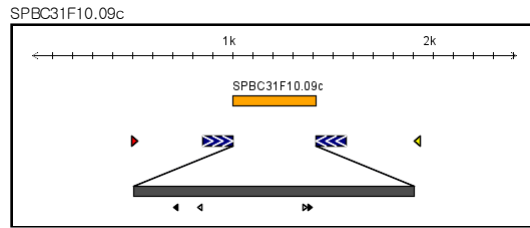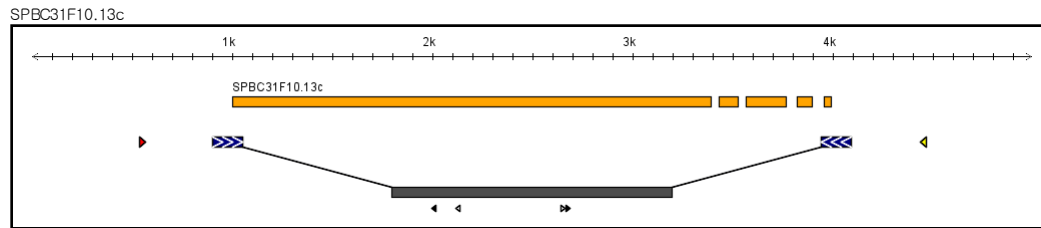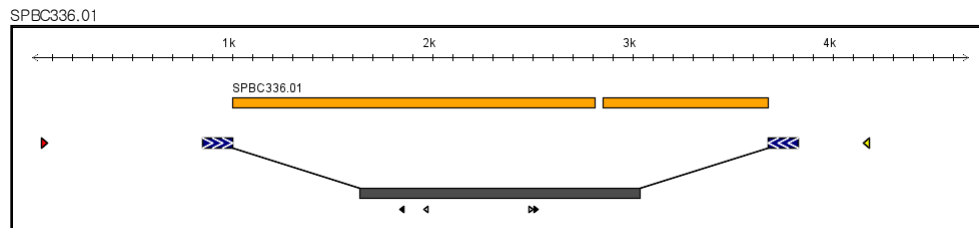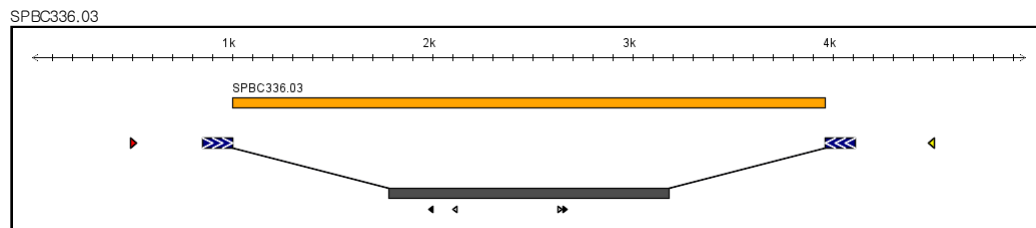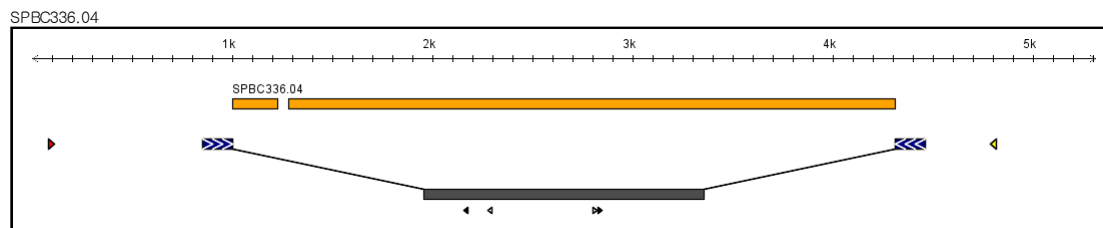

SPBC336.07



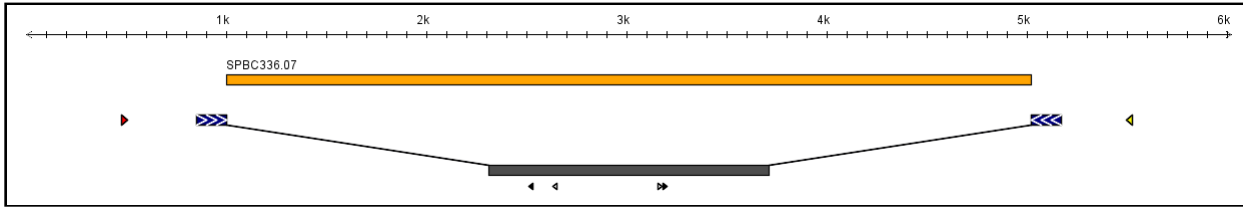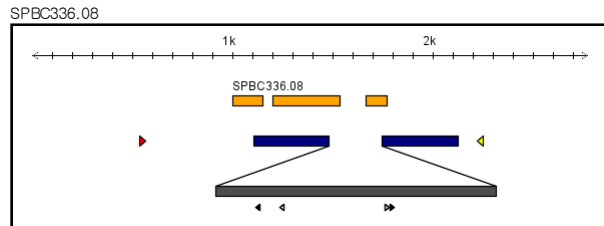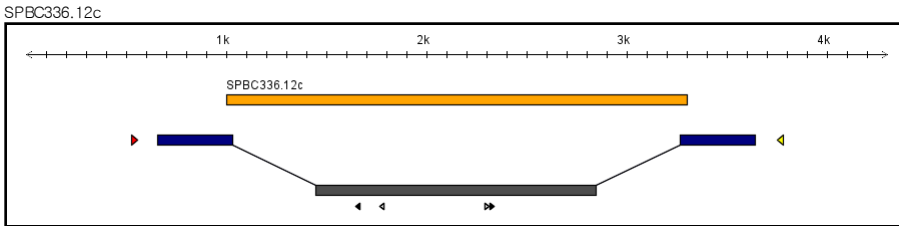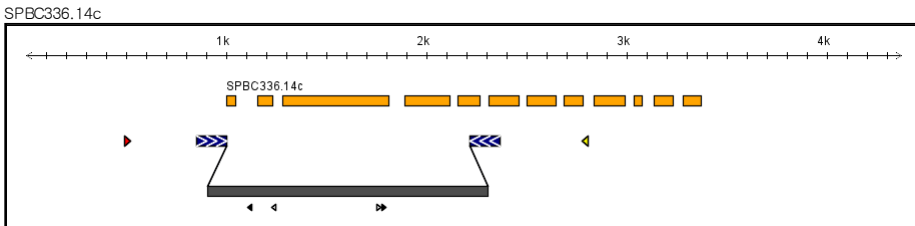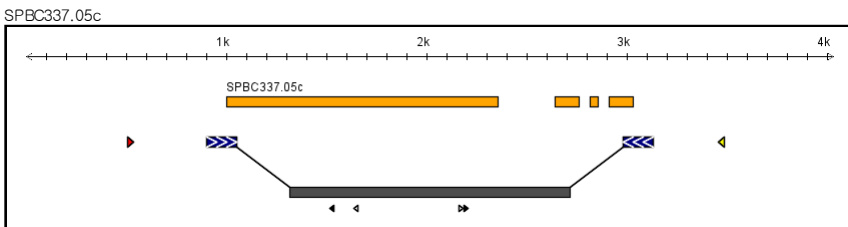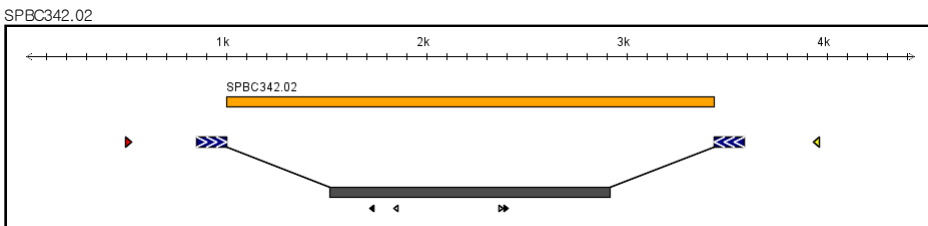

SPBC342.05

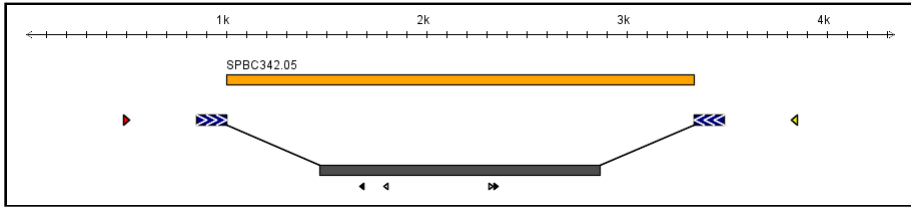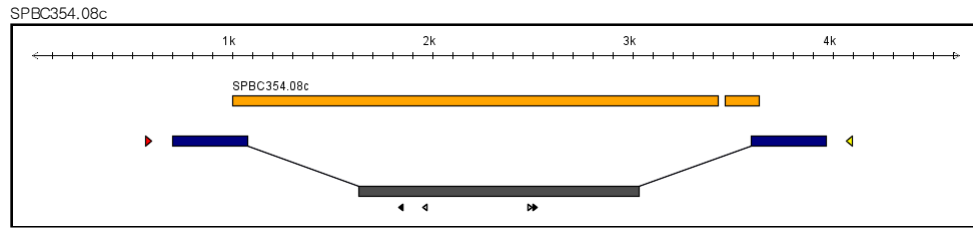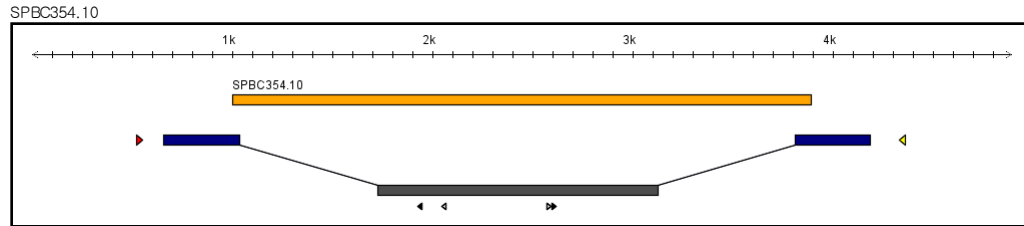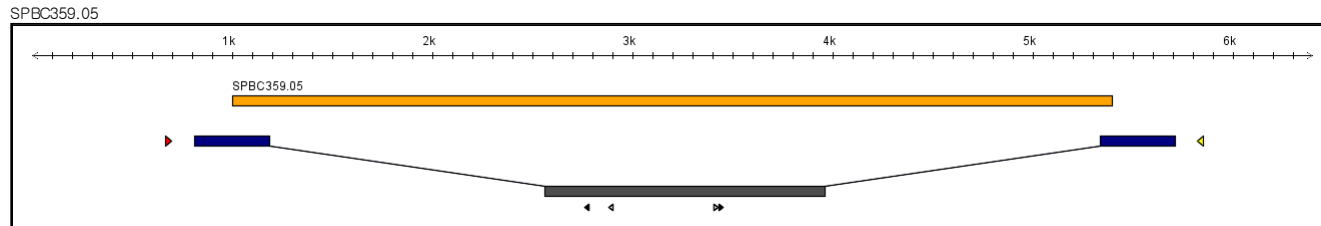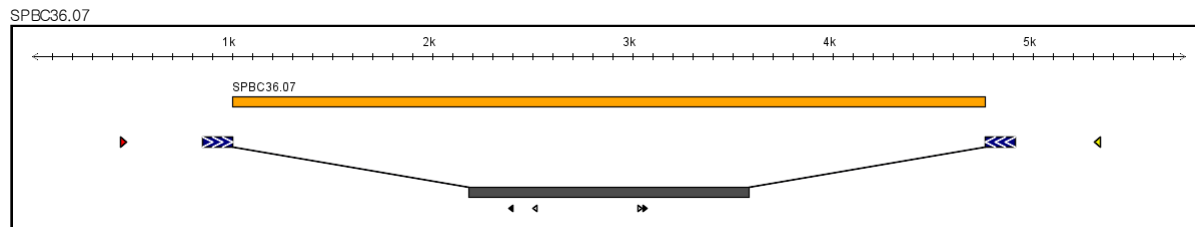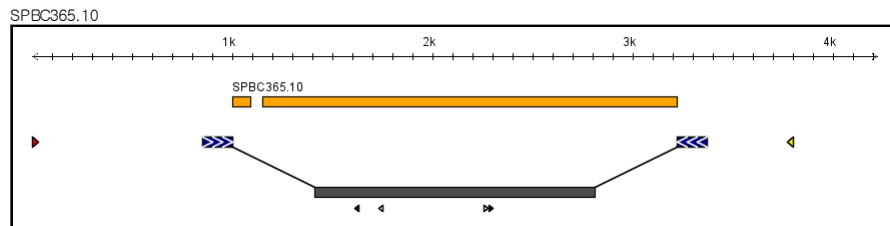

SPBC365.15

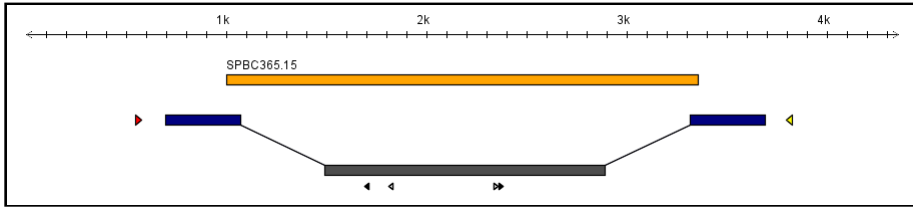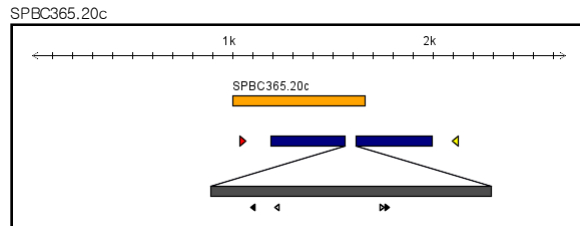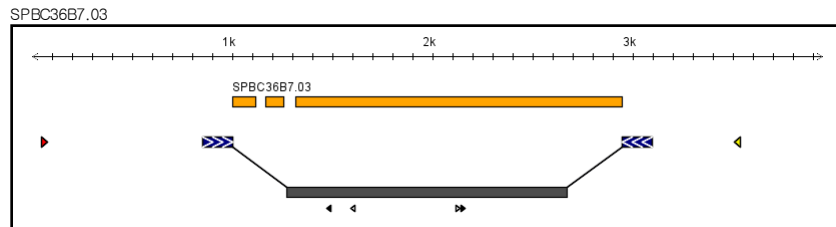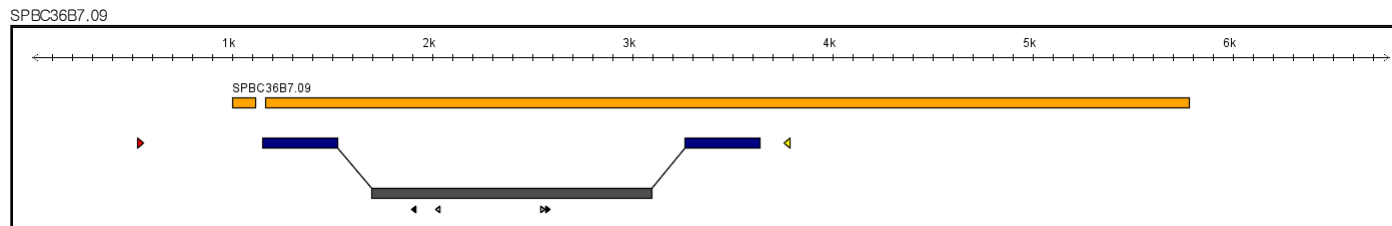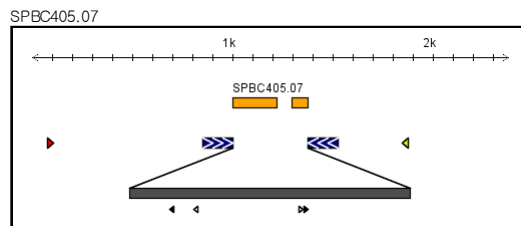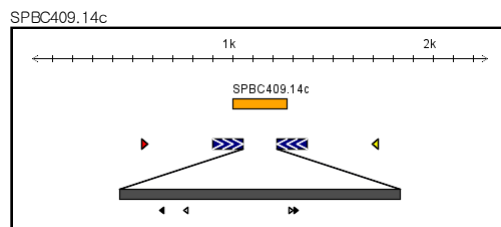

SPBC409.16c

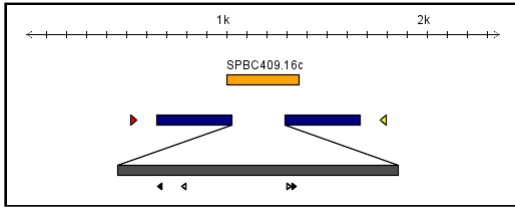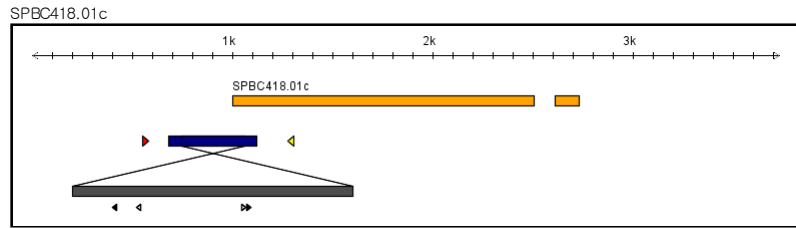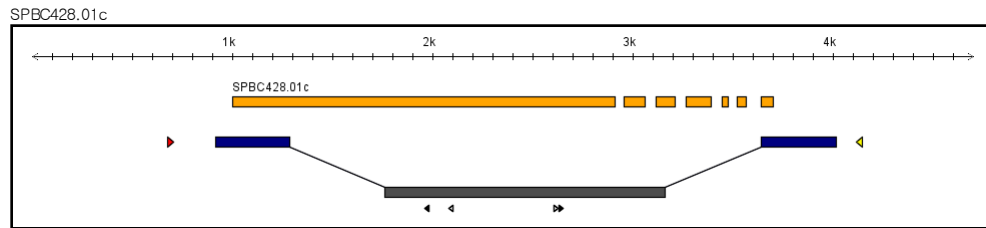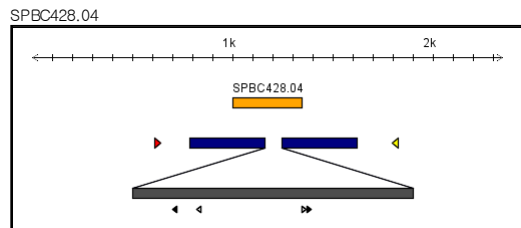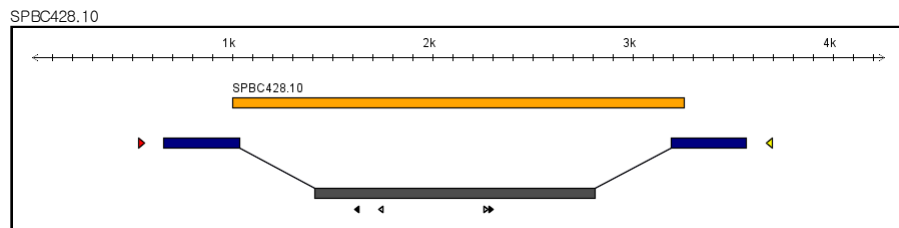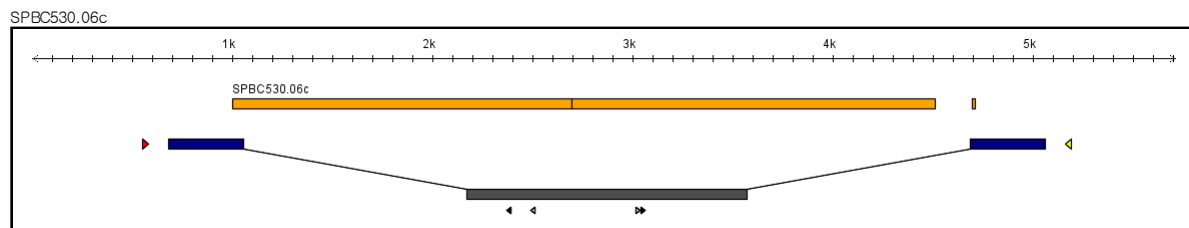

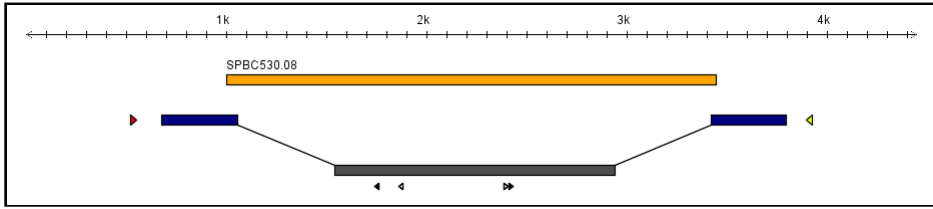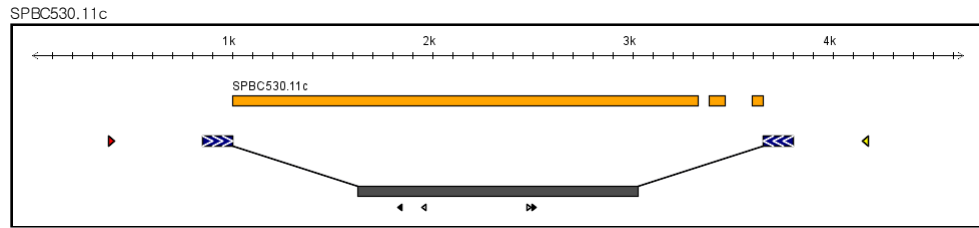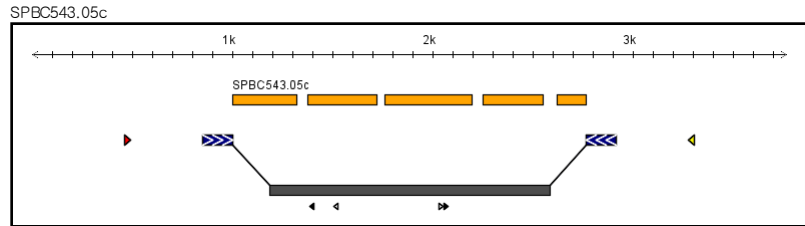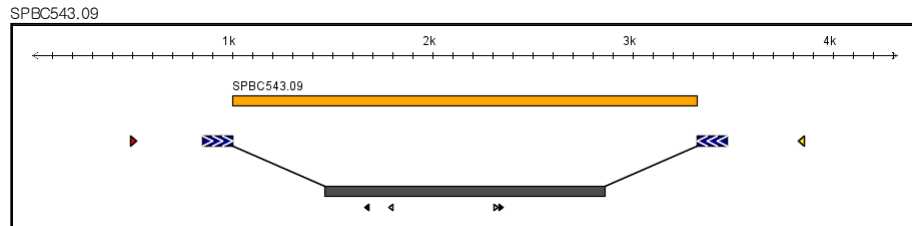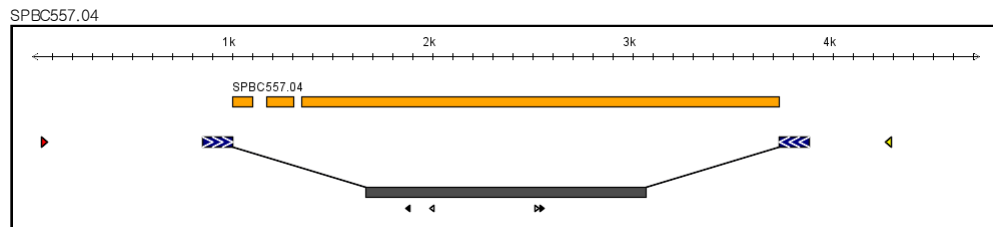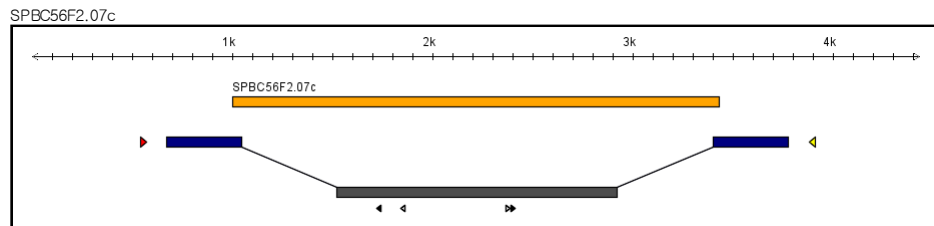

SPBC56F2.08c

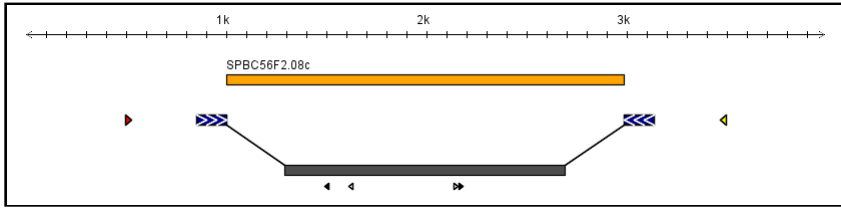

SPBC577.13

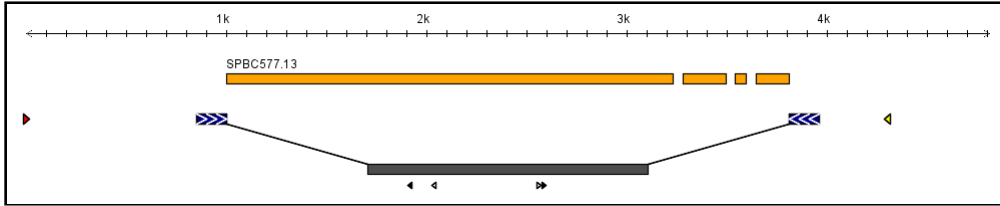

SPBC582.05c

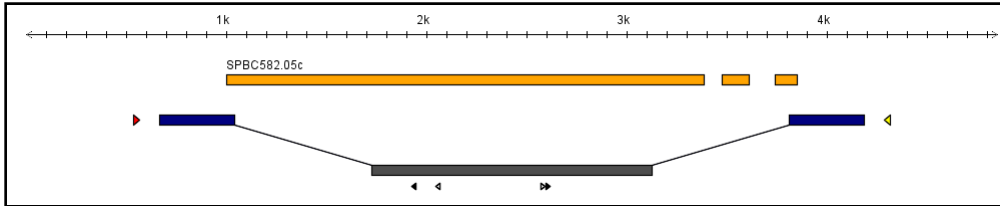

SPBC582.10c

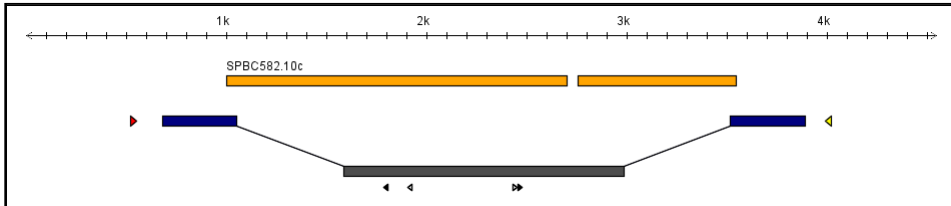

SPBC609.01

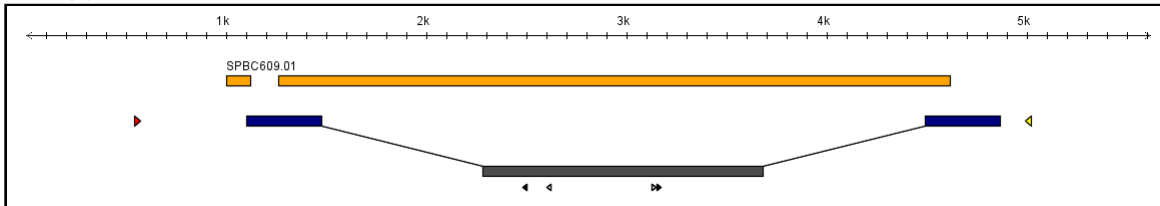

SPBC609.03

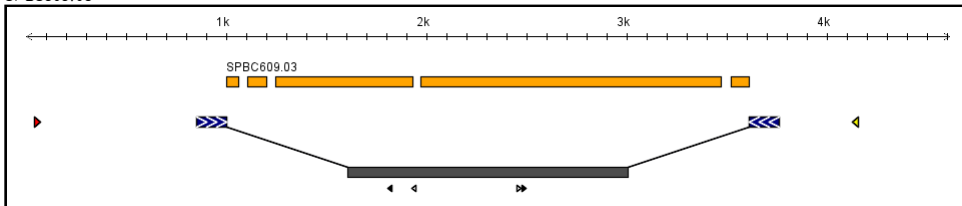

SPBC646.02

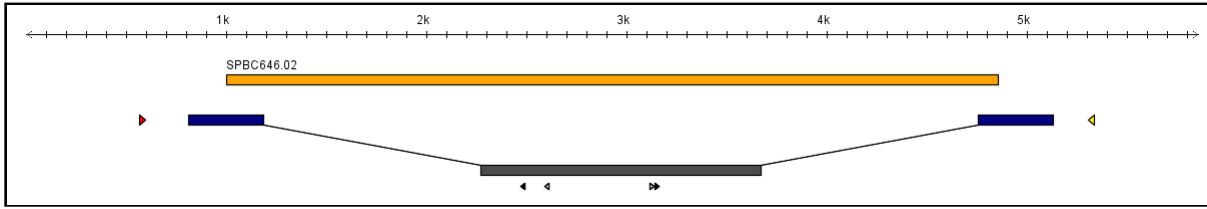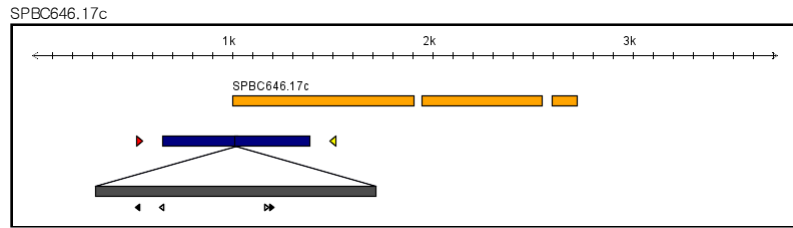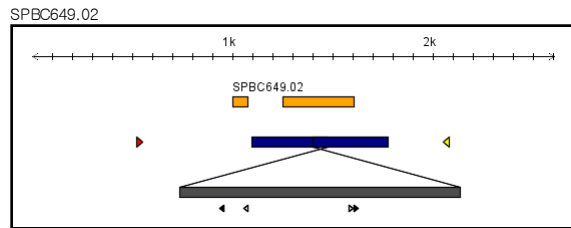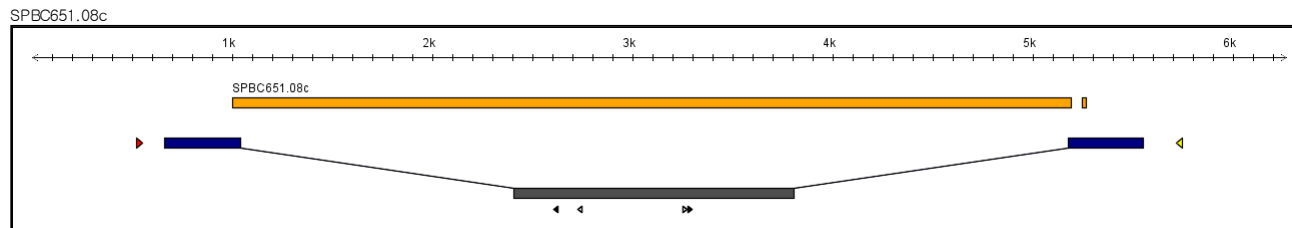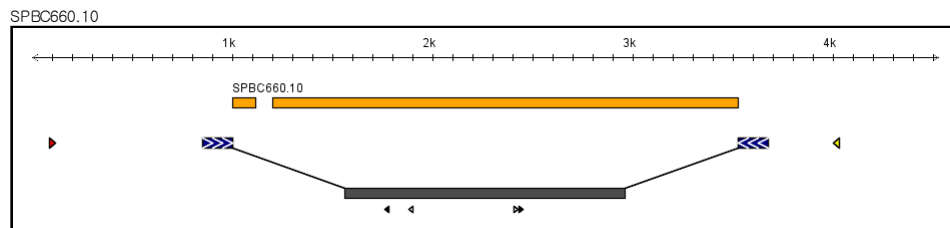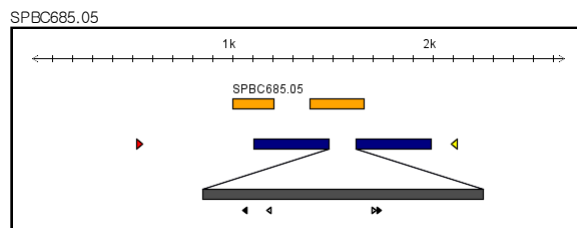

SPBC685.07c

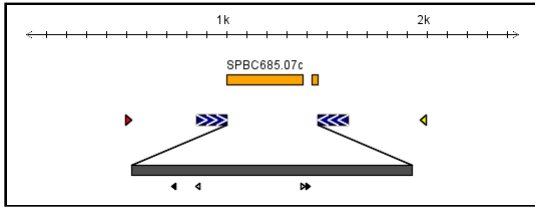

SPBC691.01

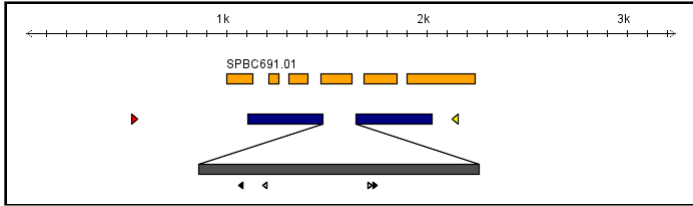

SPBC691.03c

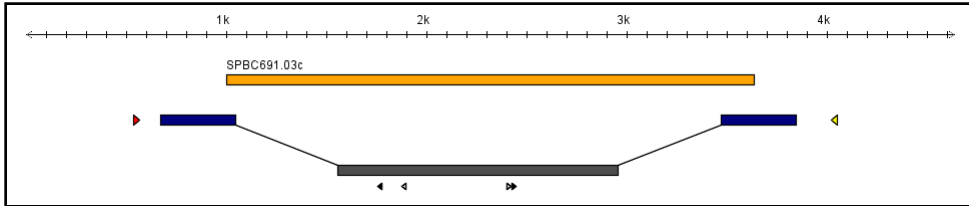

SPBC713.02c

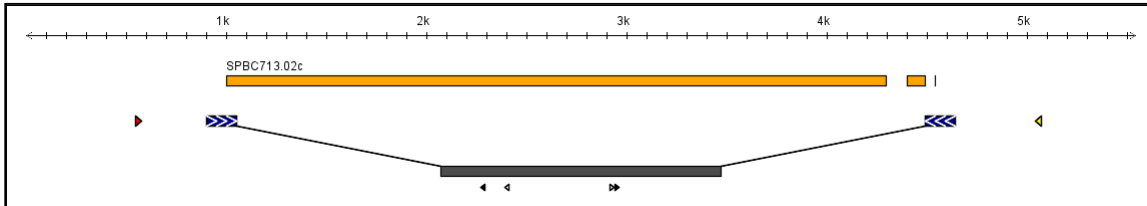

SPBC713.06

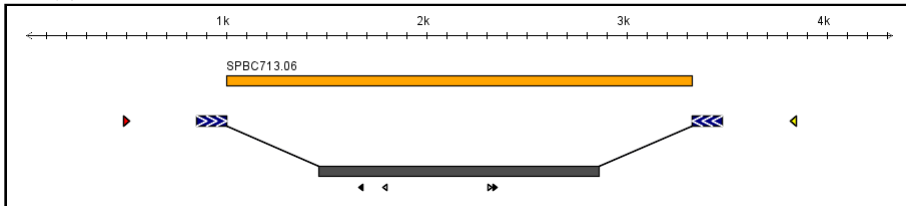

SPBC725.06c

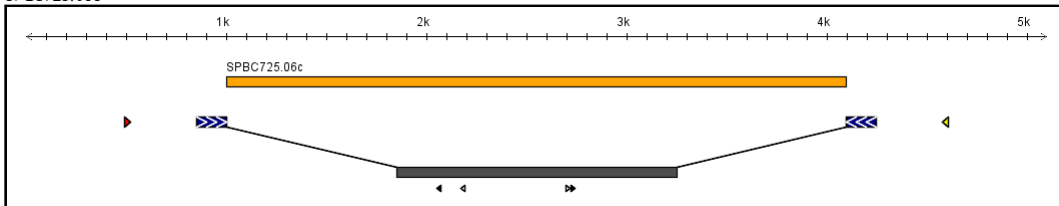

SPBC776.08c



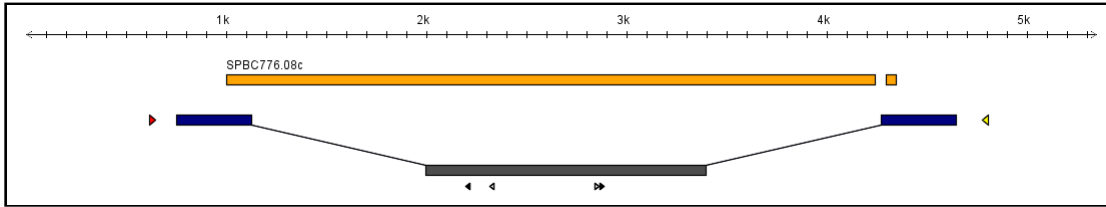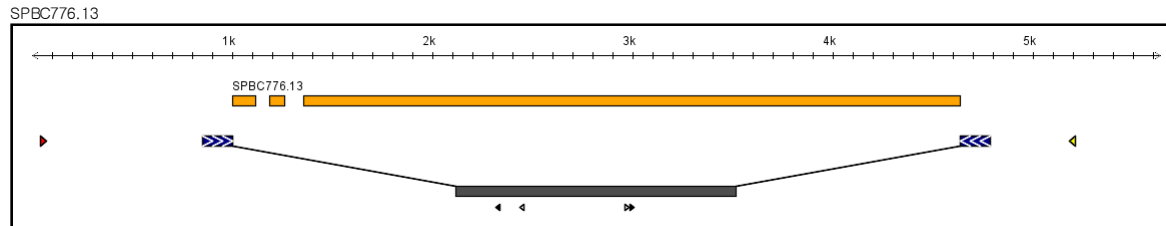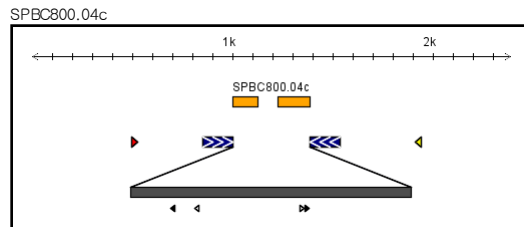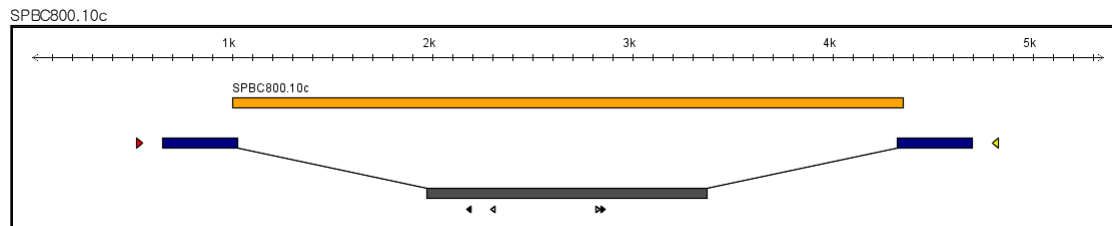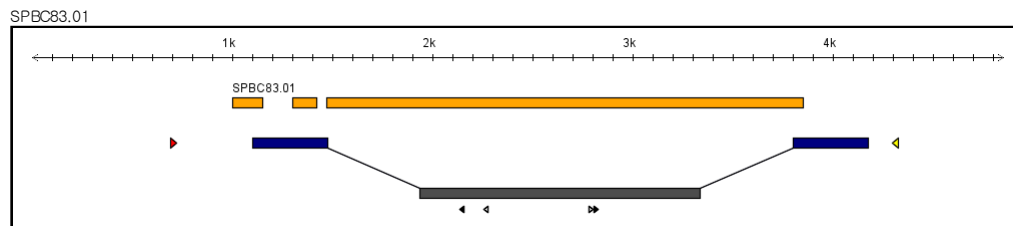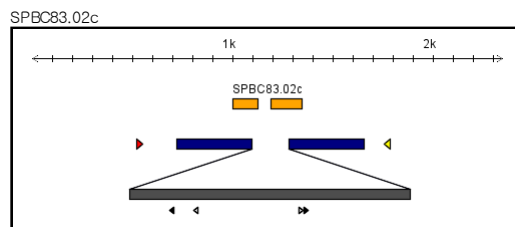

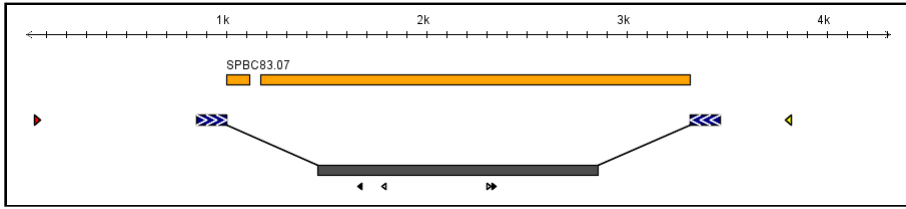

SPBC839.06

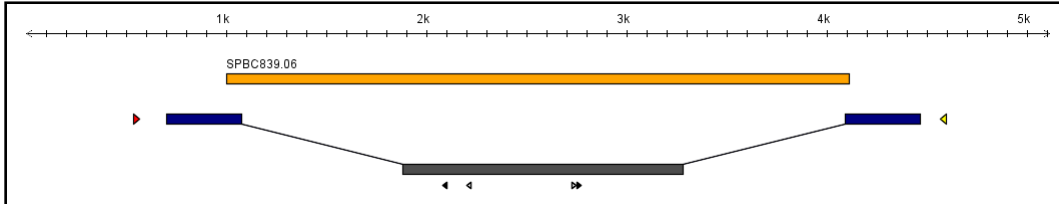

SPBC839.07

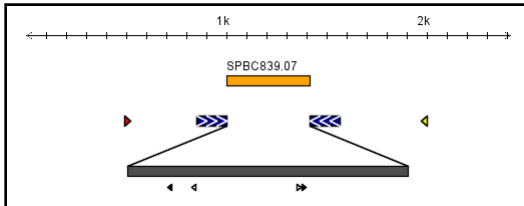

SPBC839.08c

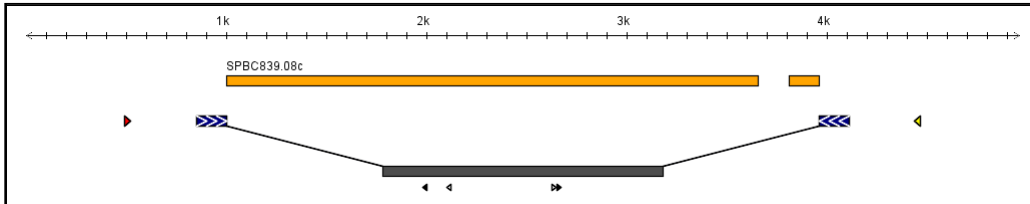

SPBC839.16

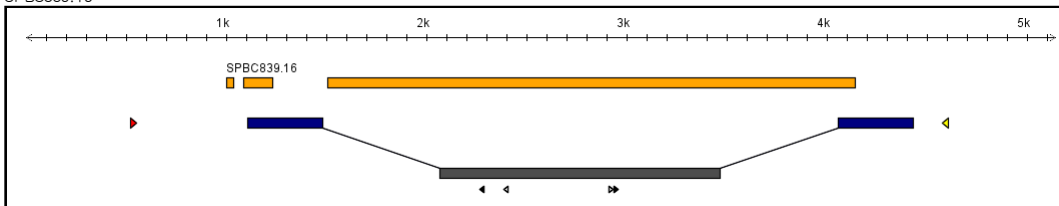

SPBC887.09c

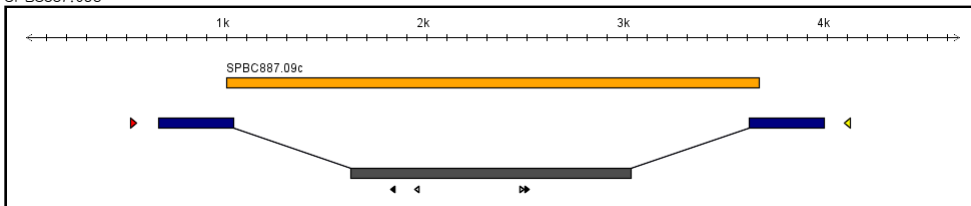

SPBC887.12

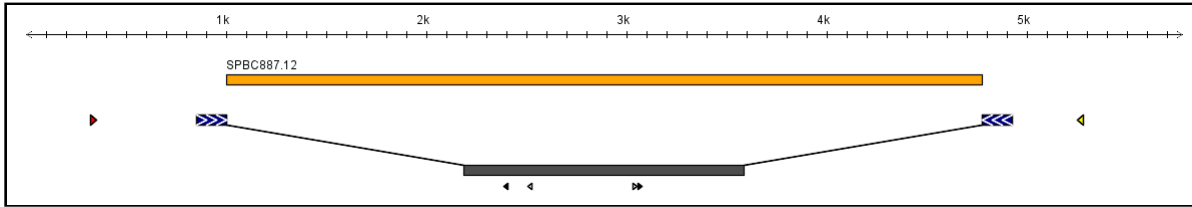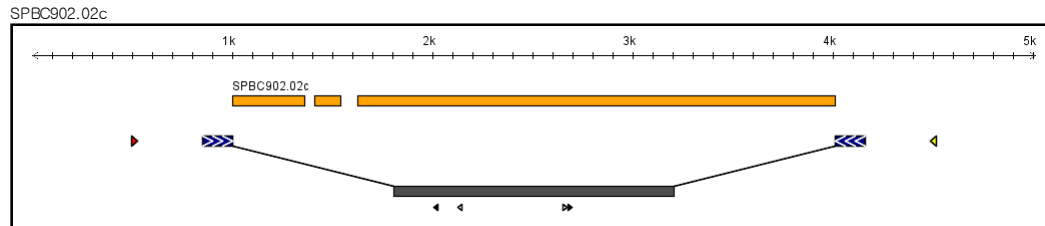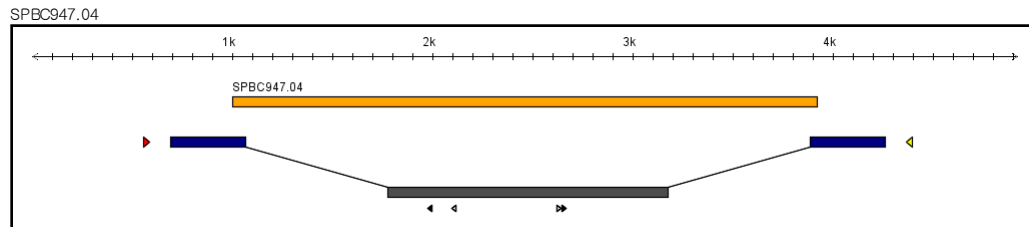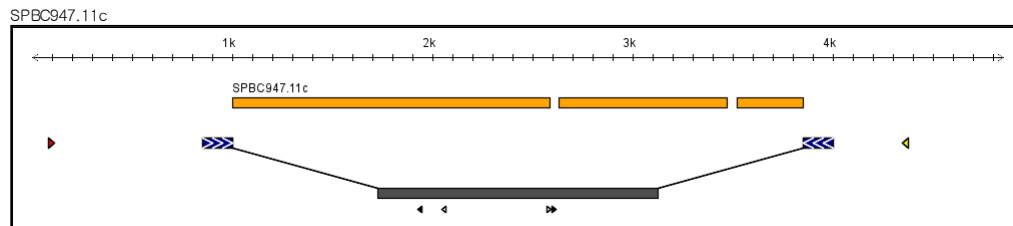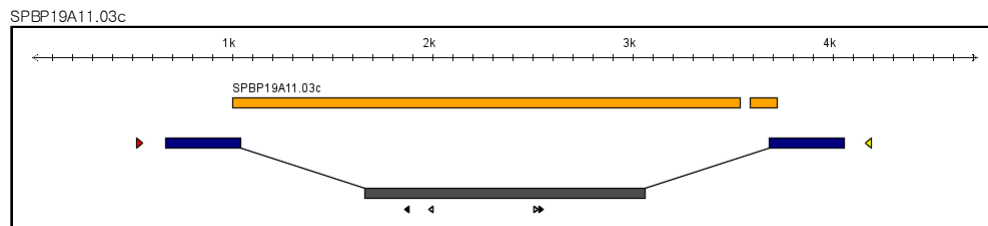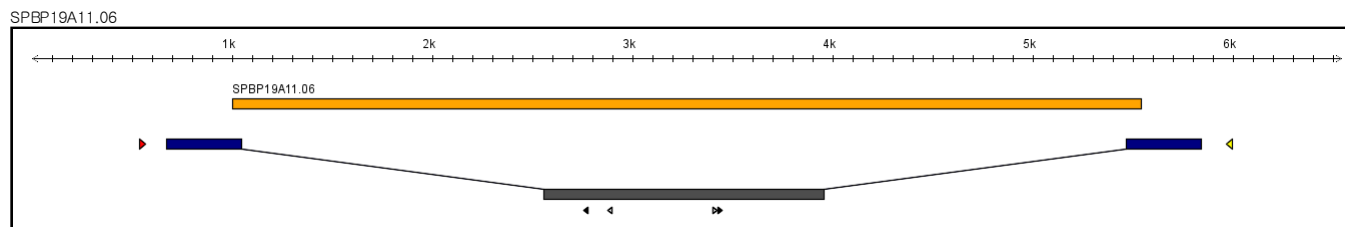

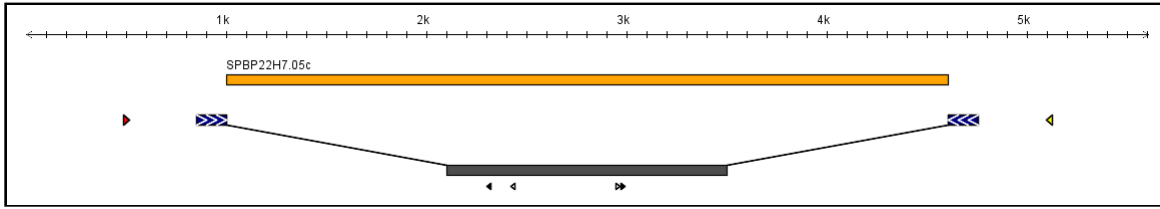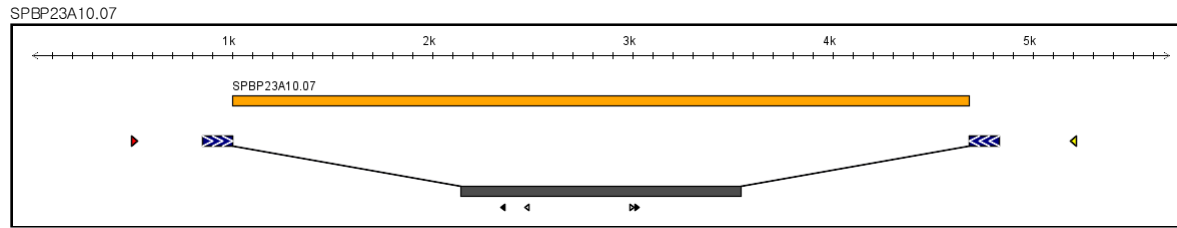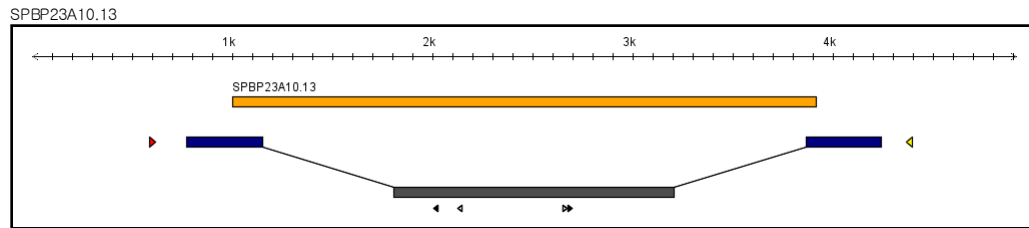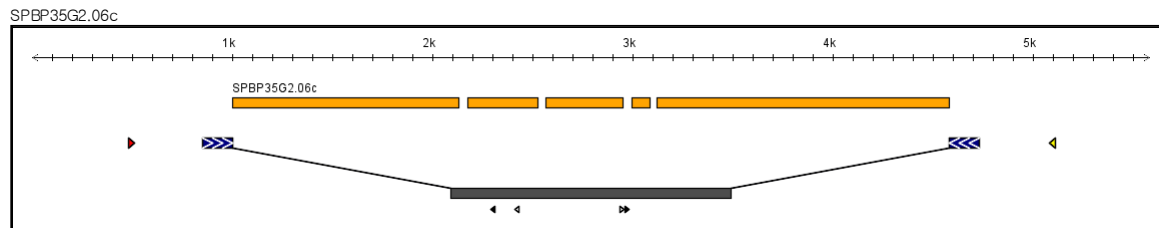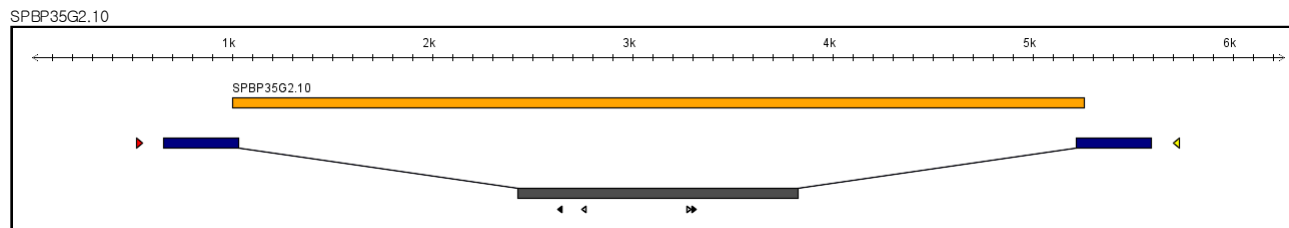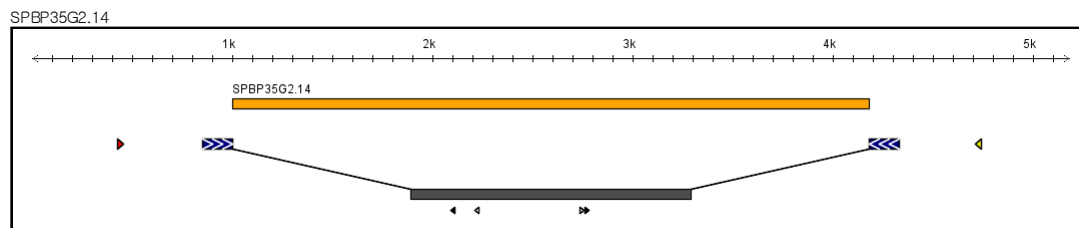

SPBP4H10.06c

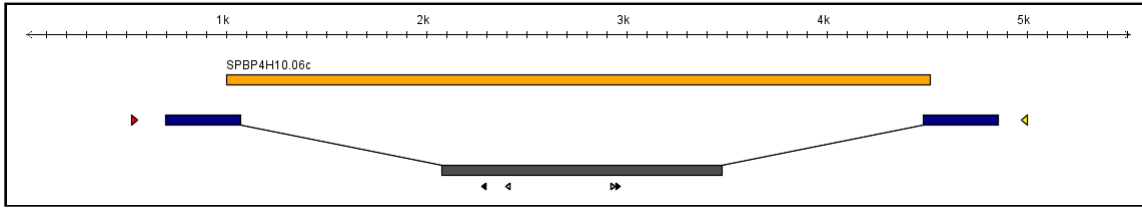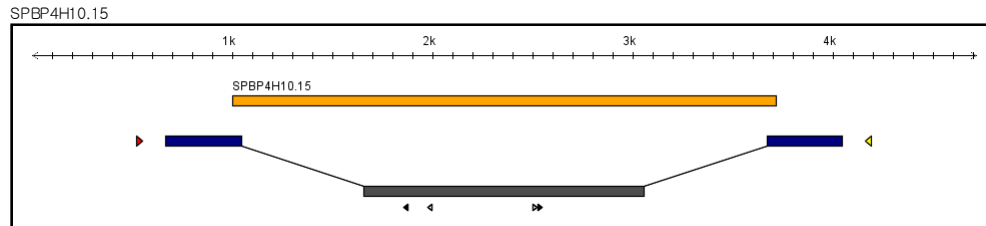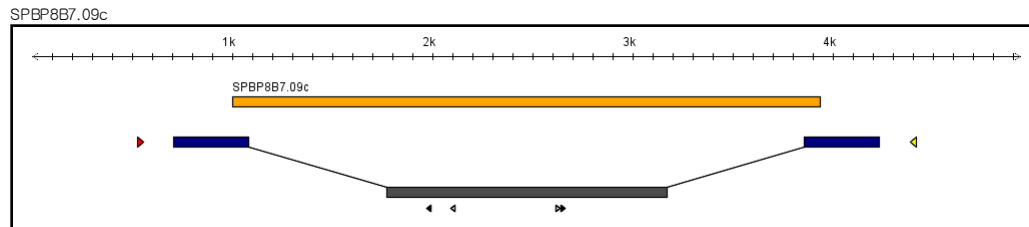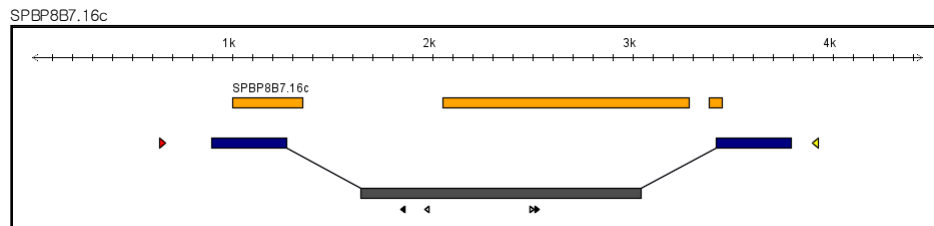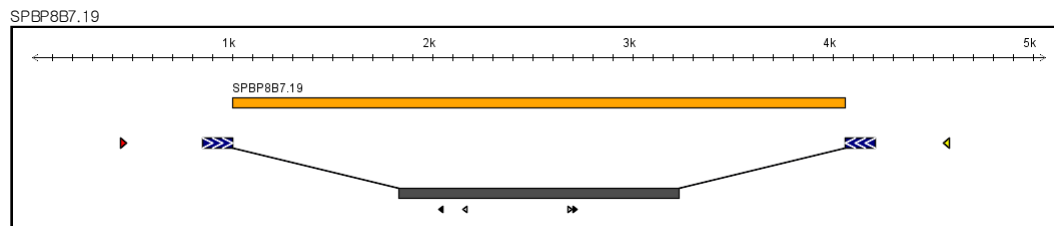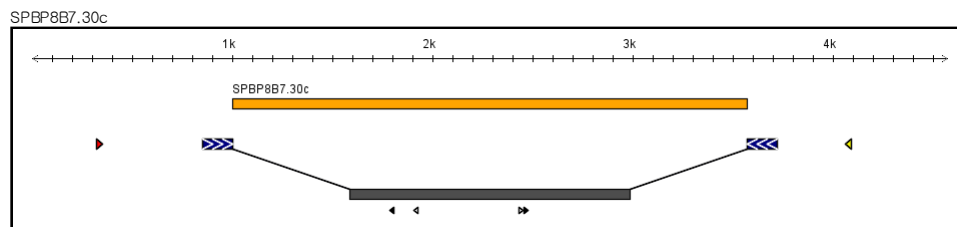

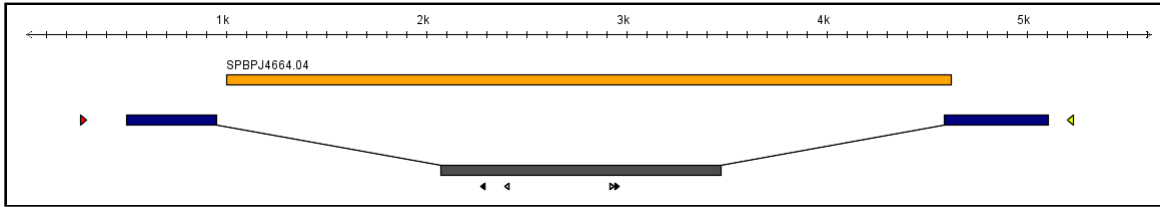

SPCC4B3.04c

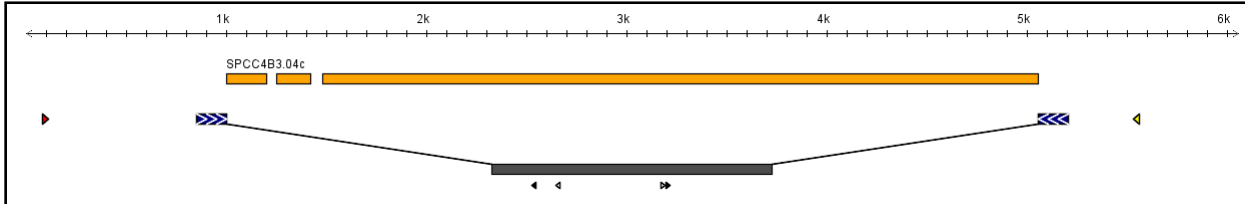

SPBC106.09

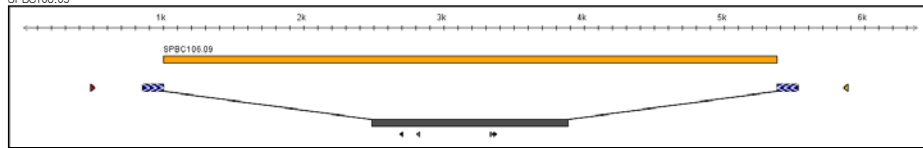

SPBC211.03c

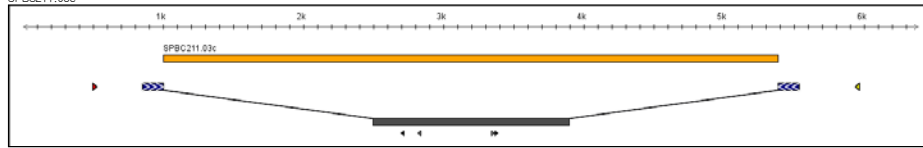

SPBC216.05

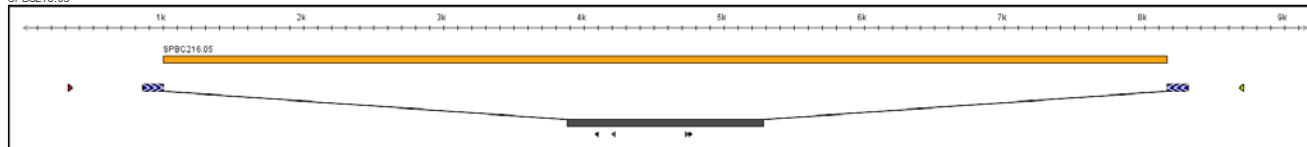

SPBC29A10.10c

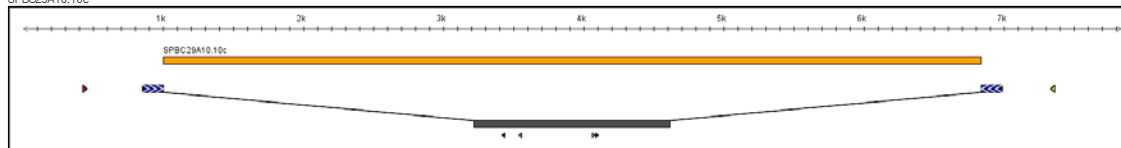

SPBC30D10.10c

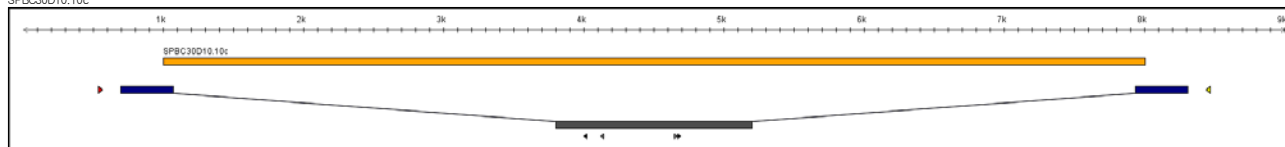

SPBC31F10.14c

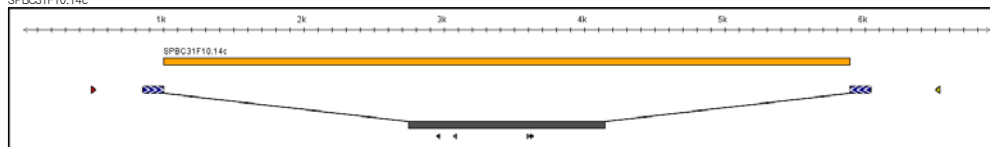

SPBC32H8.13c

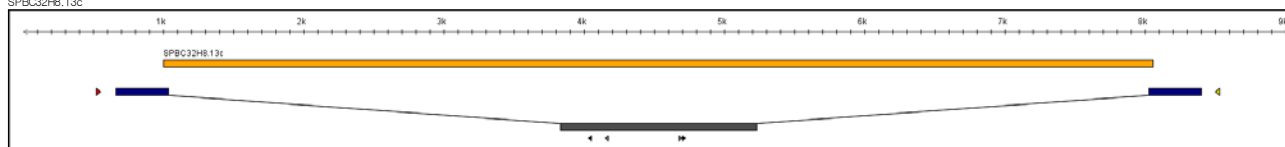

SPBC56F2.04

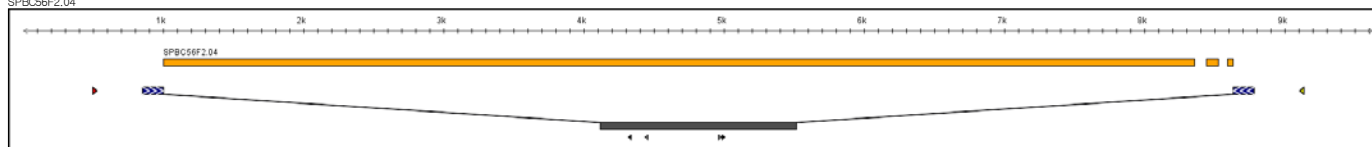

SPBC577.06c

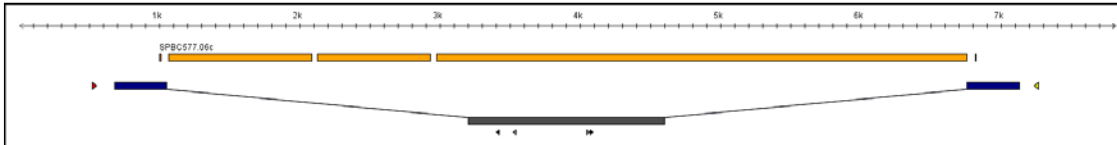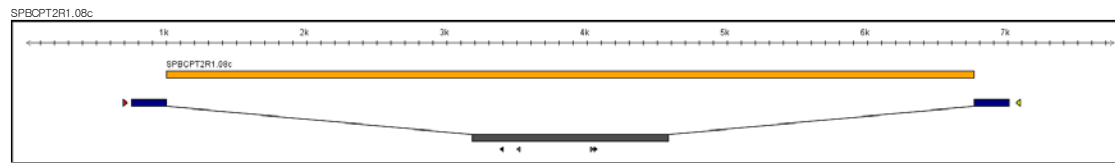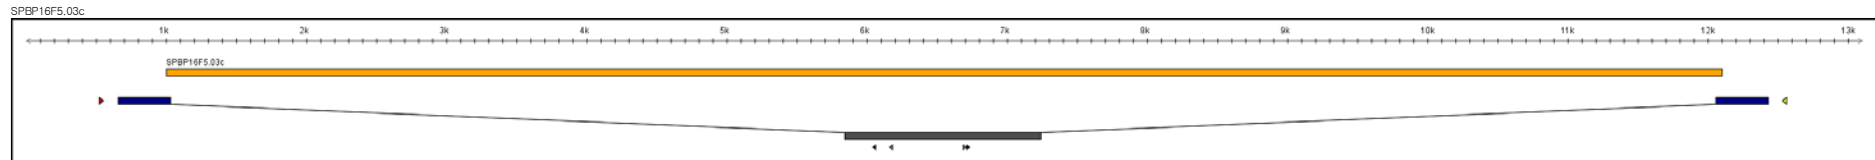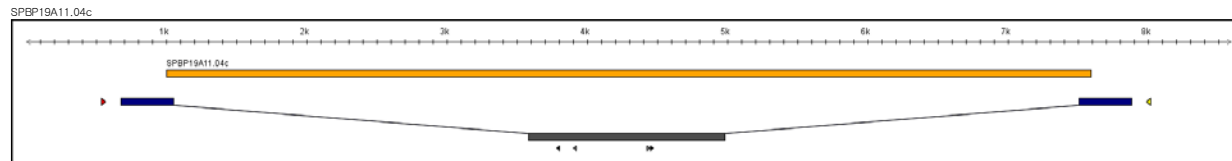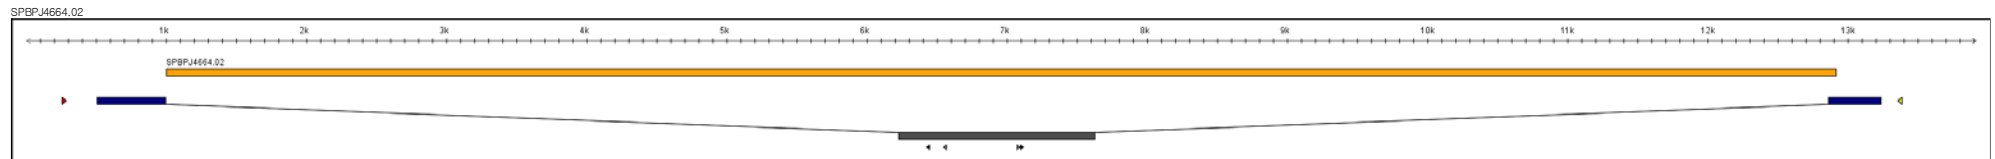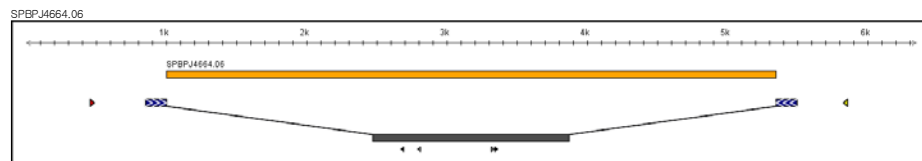



SPOC1020.01c

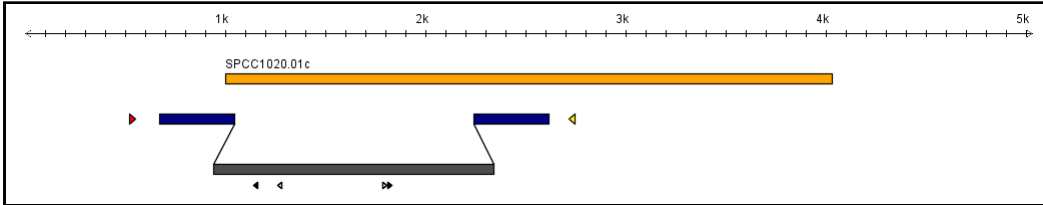

SPOC1020.03

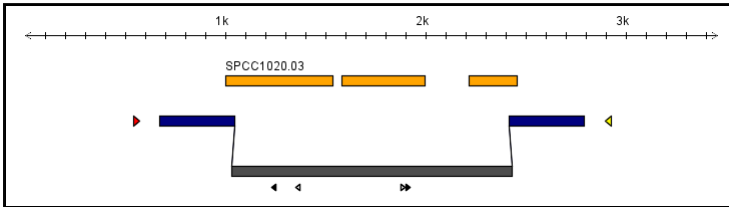

SPOC1020.04c

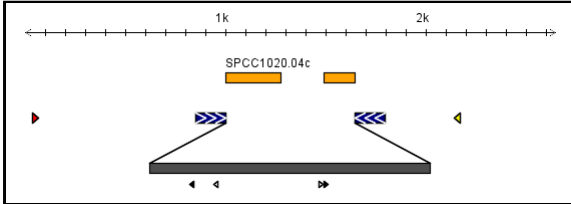

SPOC1020.05

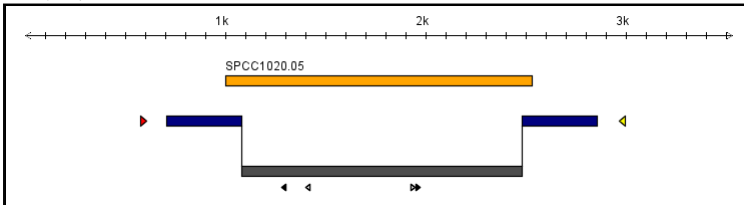

SPOC1020.06c

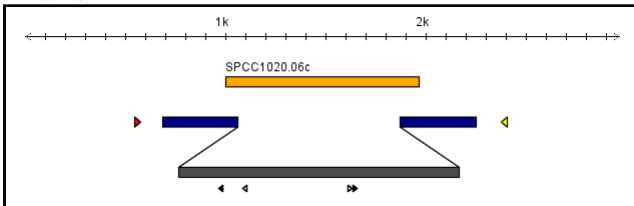

SPOC1020.07

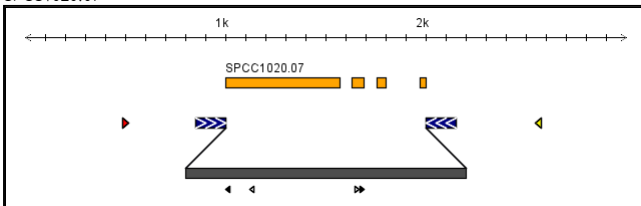

SPOC1020.08

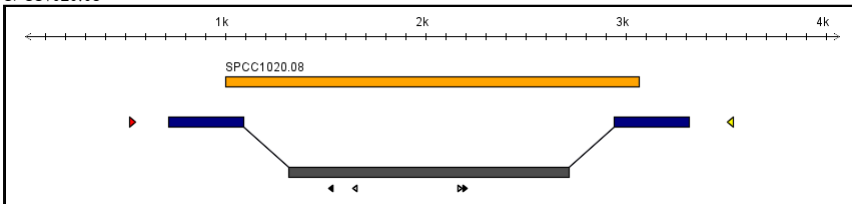

SPOC1020.09

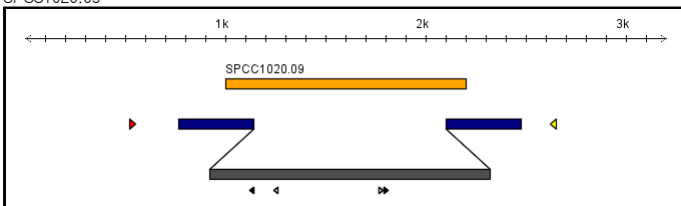

SPOC1020.10

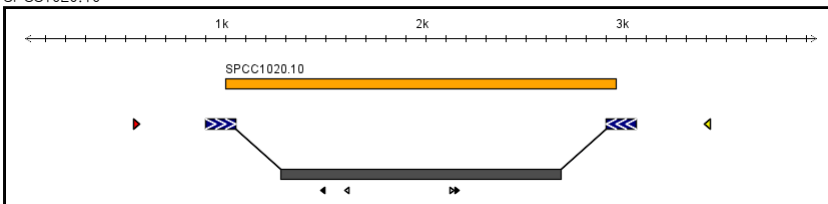

SPCC1020.12c

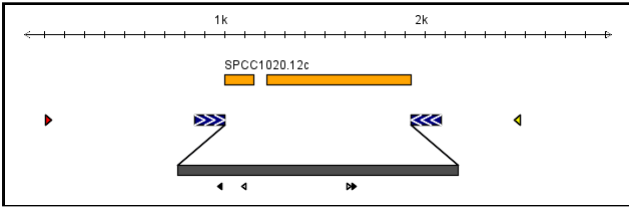

SPCC1020.13c

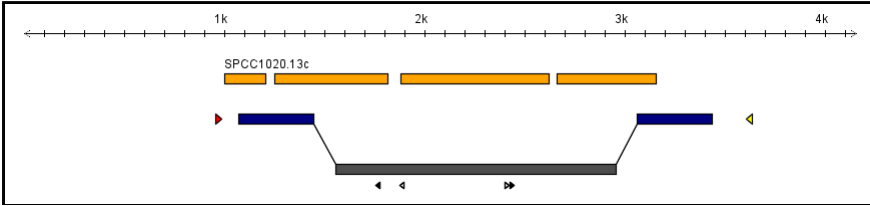

SPCC1183.01

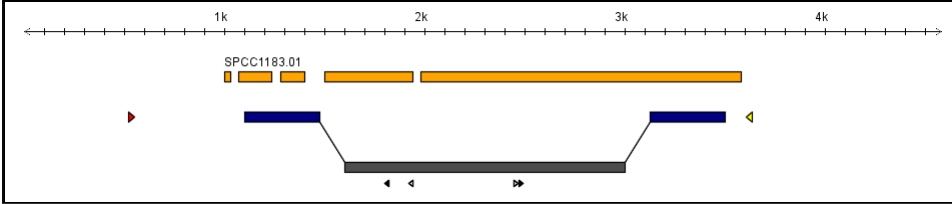

SPCC1183.02

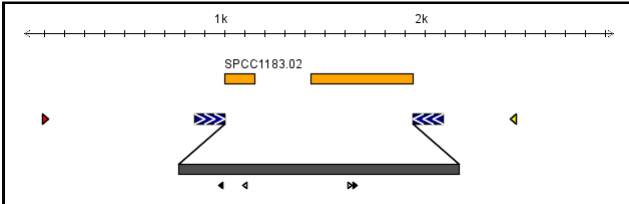

SPCC1183.03c

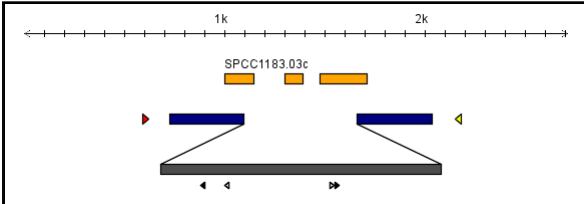

SPCC1183.04c

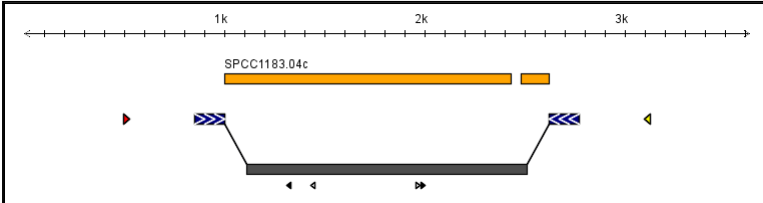

SPCC1183.06

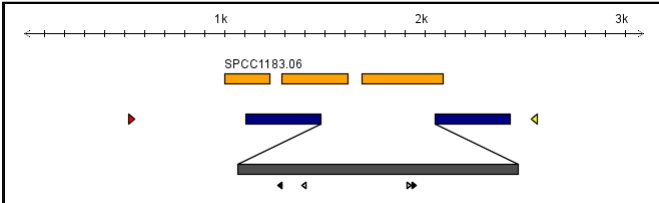

SPCC1183.08c

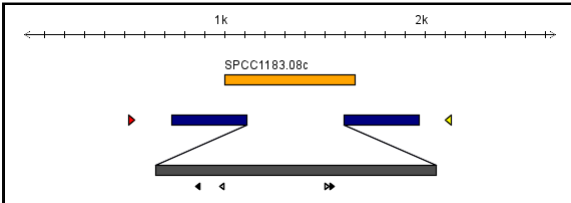

SPCC1183.09c

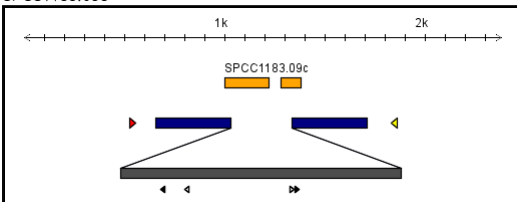

SPCC1183.10

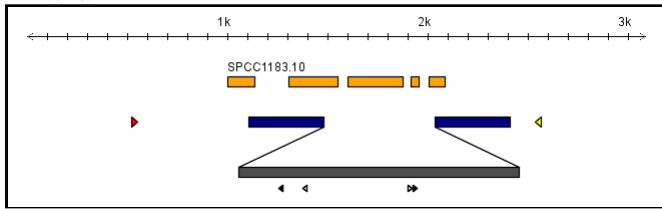

SPCC11E10.01

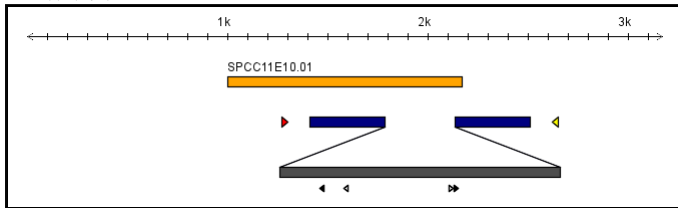

SPCC11E10.02c

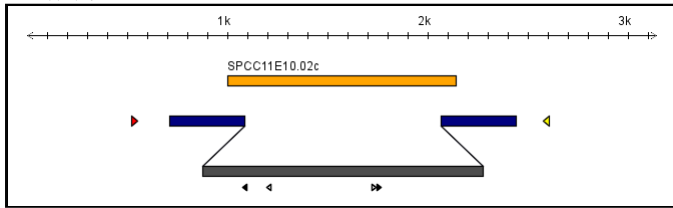

SPCC11E10.03

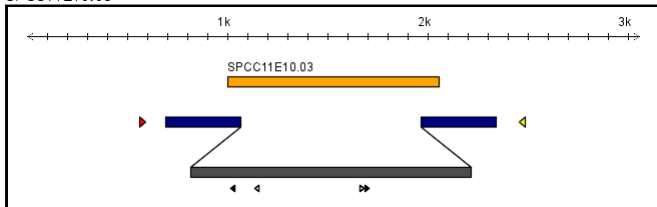

SPCC11E10.04

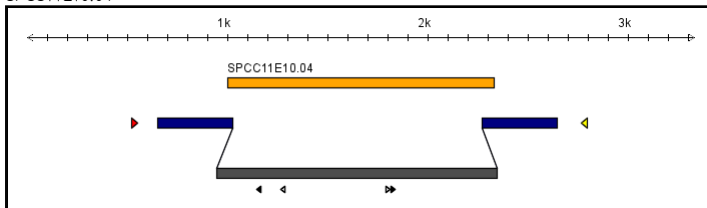

SPCC11E10.05c

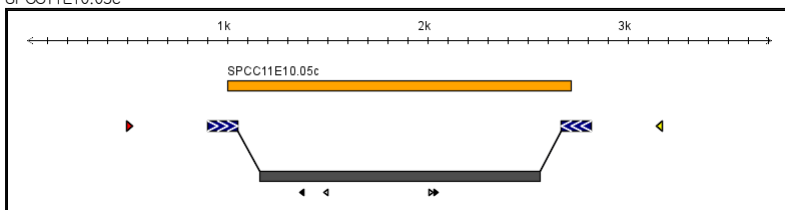

SPCC11E10.06c

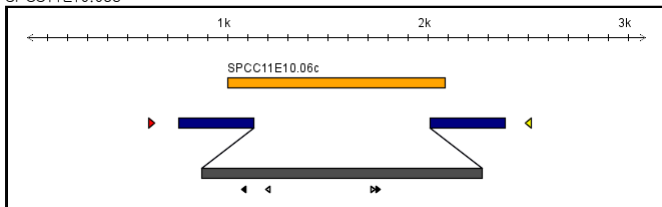

SPCC11E10.07c

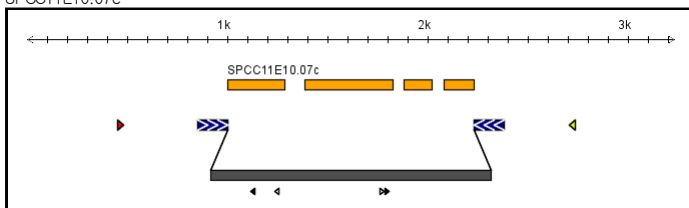

SPCC11E10.09c

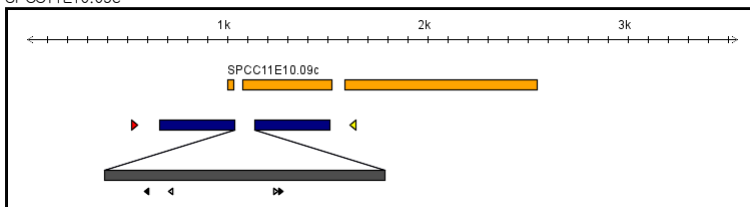

SPCC1223.02

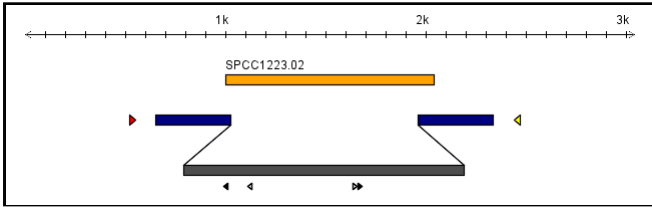

SPCC1223.03c

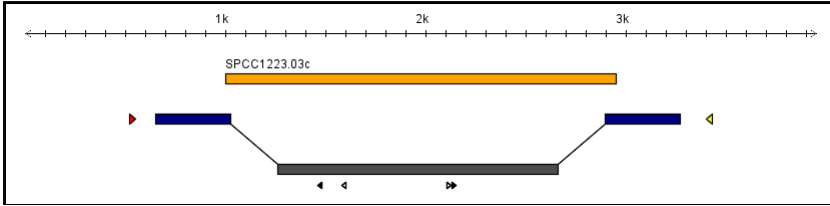

SPCC1223.04c

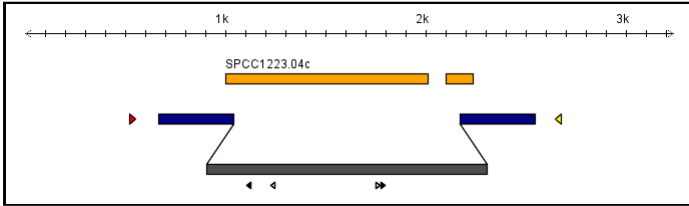

SPCC1223.07c

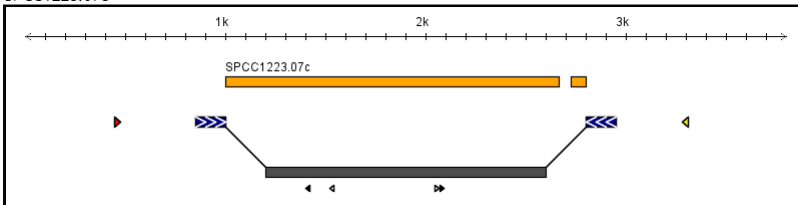

SPCC1223.08c

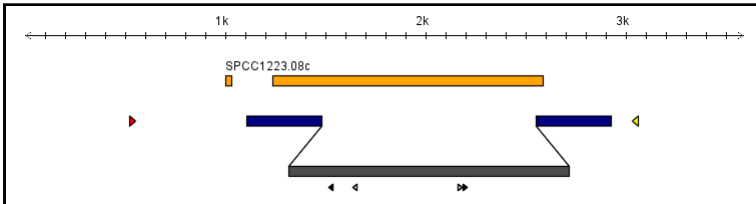

SPCC1223.09

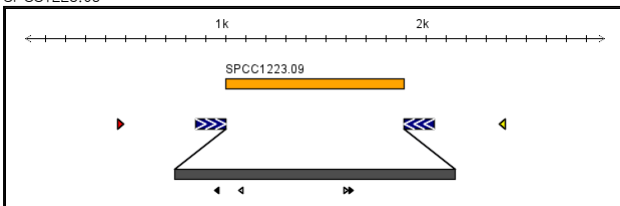

SPCC1223.10c

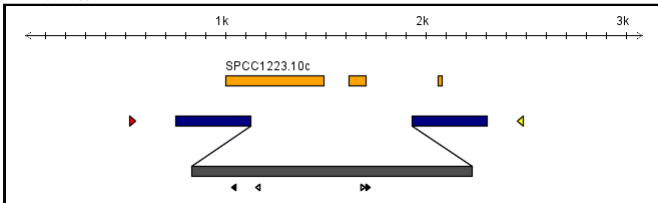

SPCC1223.11

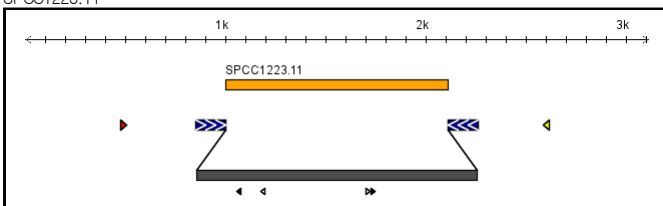

SPCC1223.12c

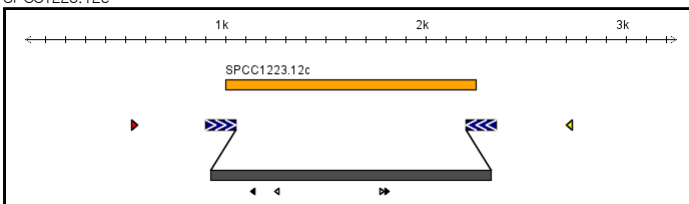

SPCC1223.15c

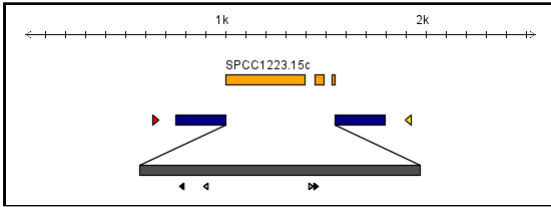

SPCC1235.02

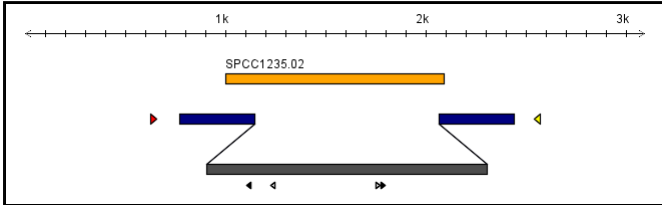

SPCC1235.03

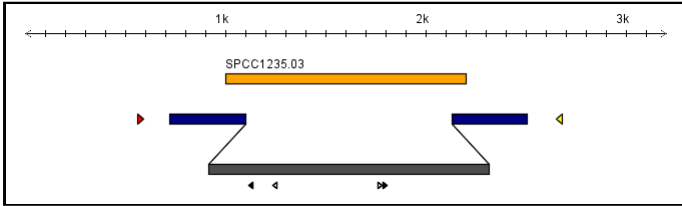

SPCC1235.04c

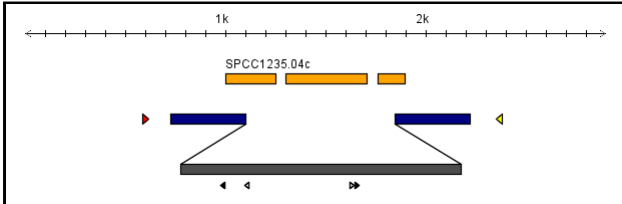

SPCC1235.06

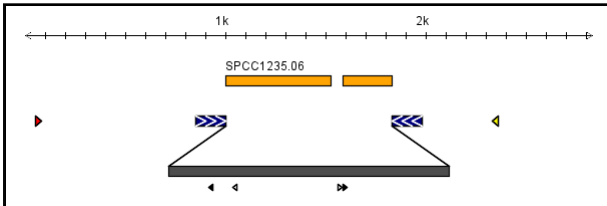

SPCC1235.07

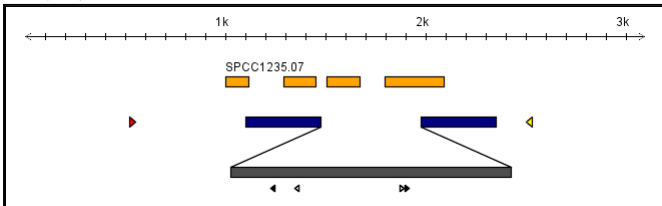

SPCC1235.08c

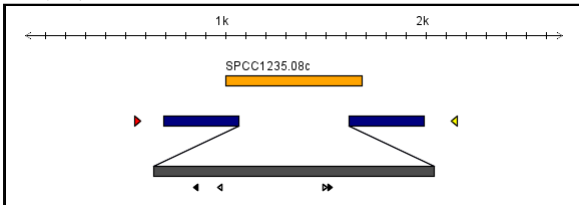

SPCC1235.09

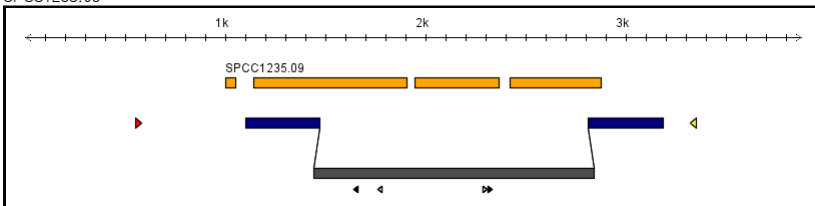

SPCC1235.10c

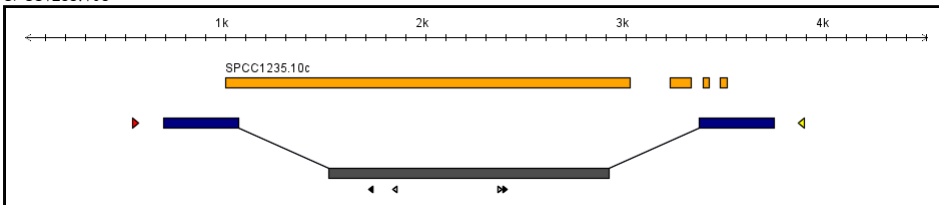

SPCC1235.11

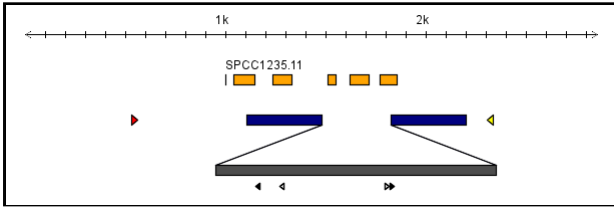

SPCC1235.12c

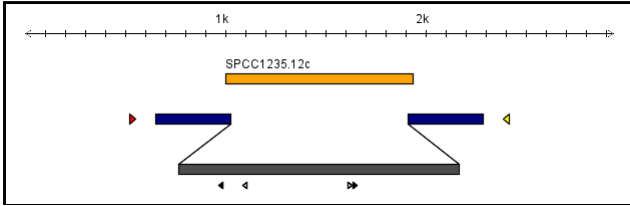

SPCC1235.13

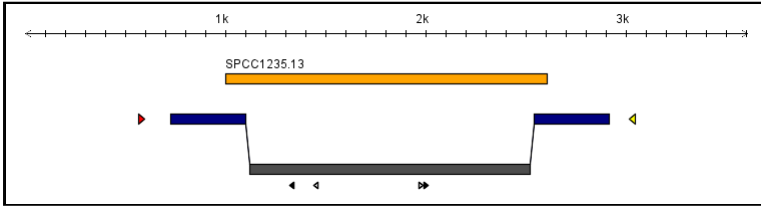

SPCC1235.14

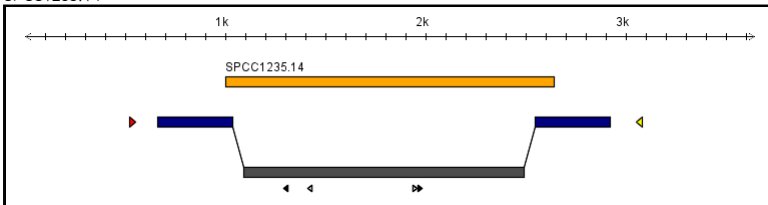

SPCC1259.03

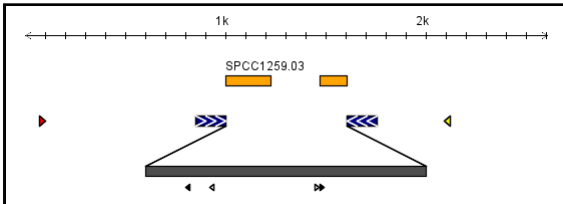

SPCC1259.04

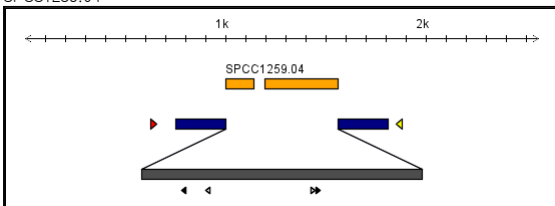

SPCC1259.06

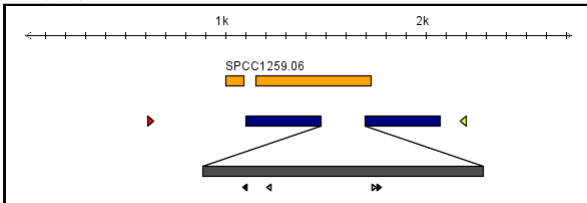

SPCC1259.07

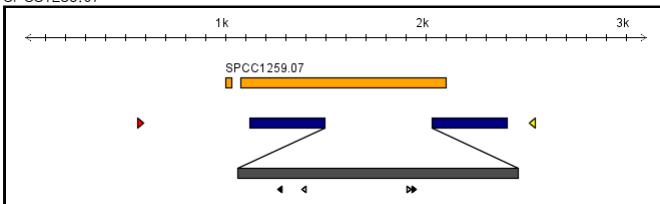

SPCC1259.08

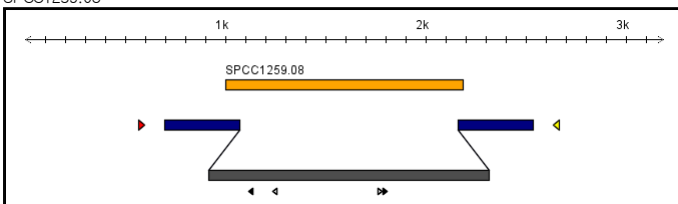

SPCC1259.09c

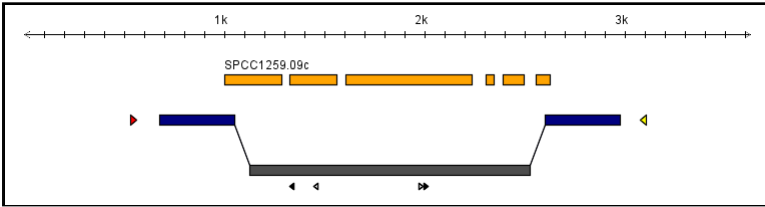

SPCC1259.10

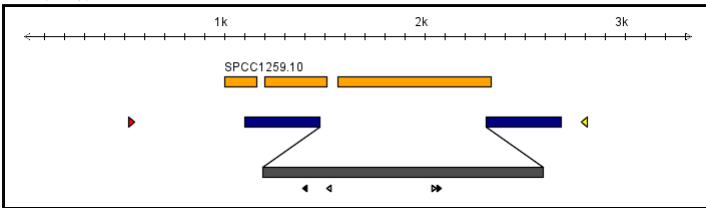

SPCC1259.12c

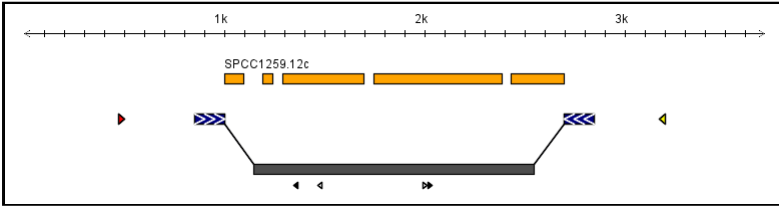

SPCC1259.13

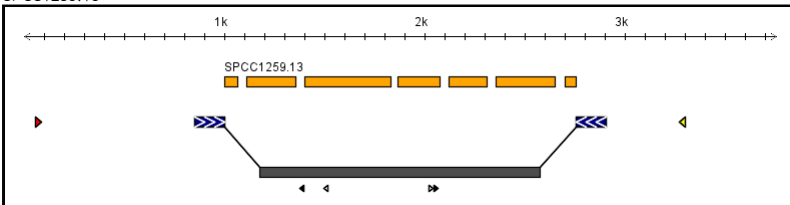

SPCC1259.14c

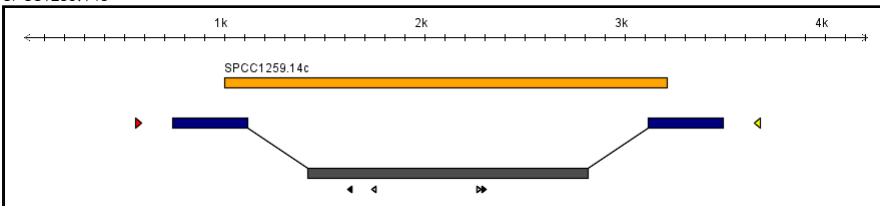

SPCC1259.15c

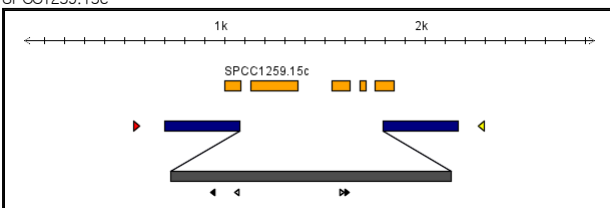

SPCC126.01c

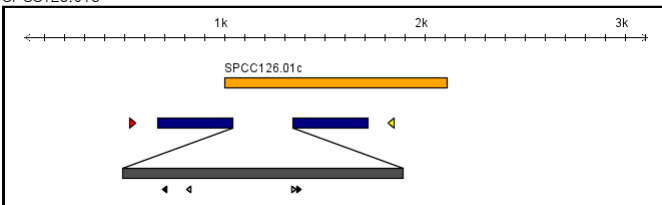

SPCC126.02c

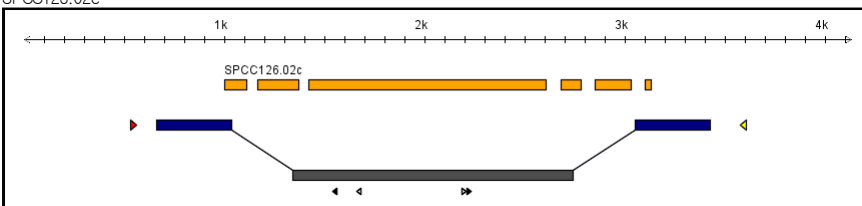

SPCC126.03

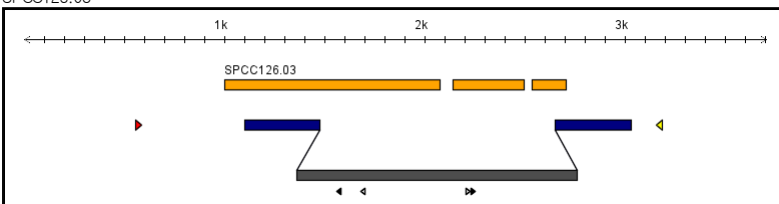

SPCC126.04c

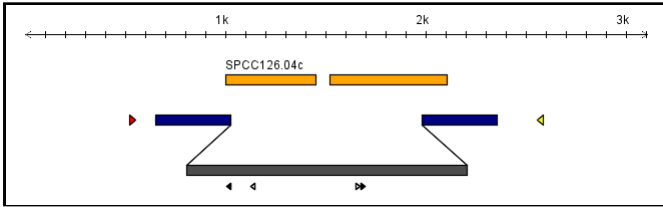

SPCC126.05c

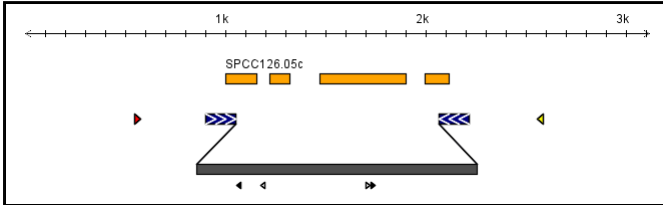

SPCC126.06

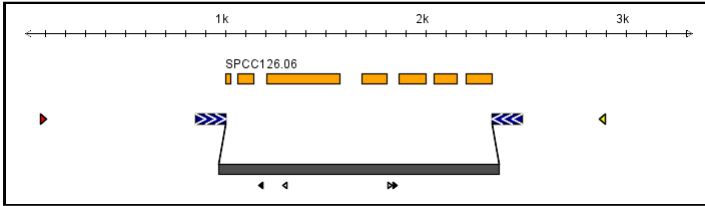

SPCC126.07c

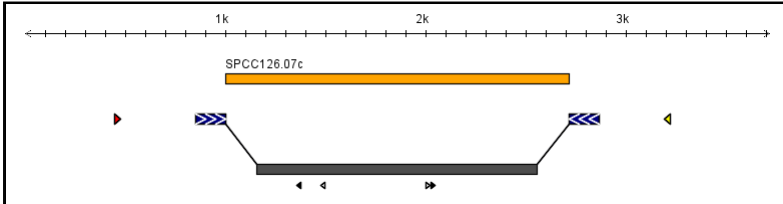

SPCC126.08c

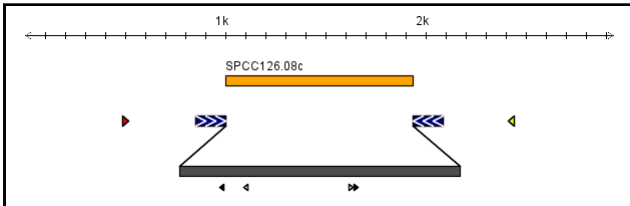

SPCC126.09

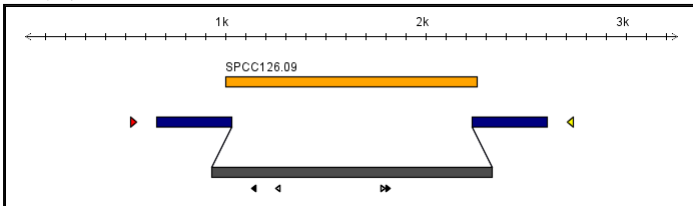

SPCC126.10

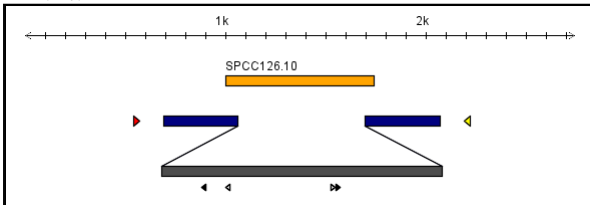

SPCC126.11c

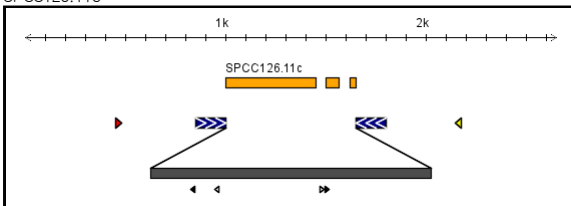

SPCC126.12

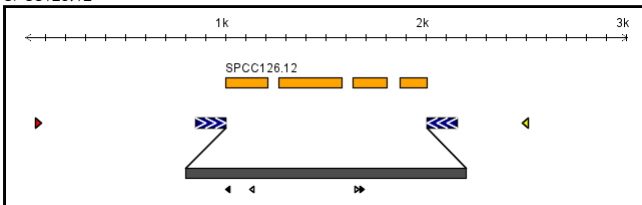



SPCC126.13c

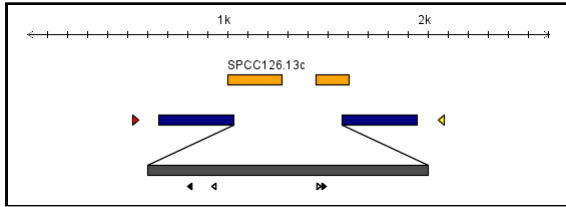

SPCC126.14

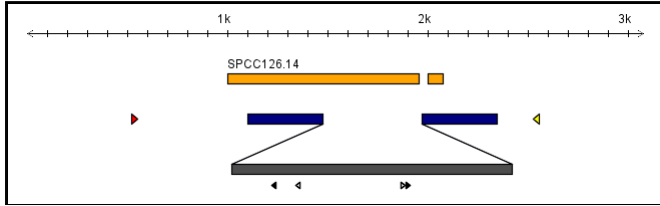

SPCC126.15c

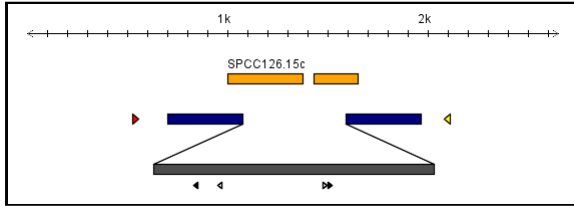

SPCC1281.02c

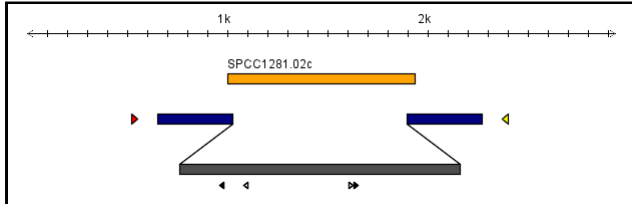

SPCC1281.03c

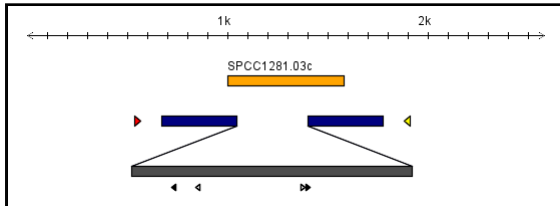

SPCC1281.04

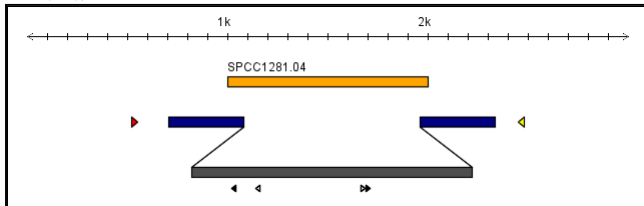

SPCC1281.05

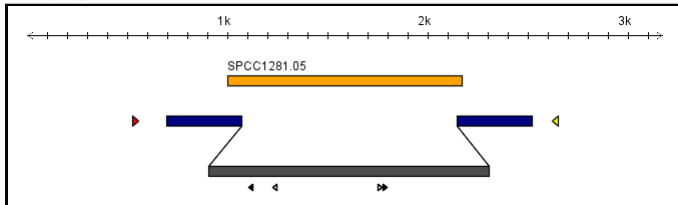

SPCC1281.06c

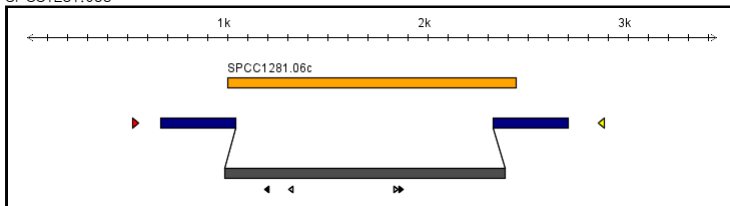

SPCC1281.07c

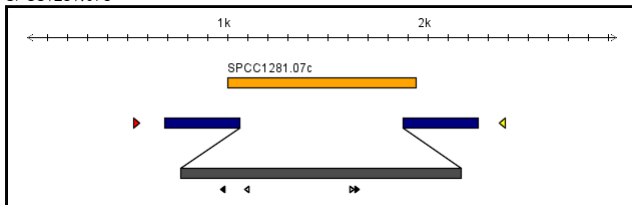

SPCC1281.08

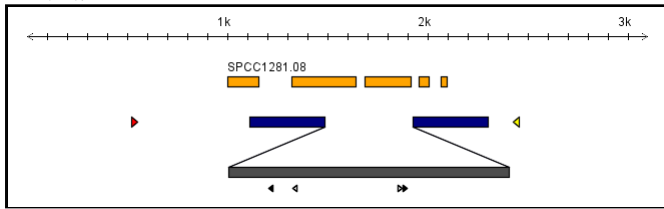

SPCC132.01c

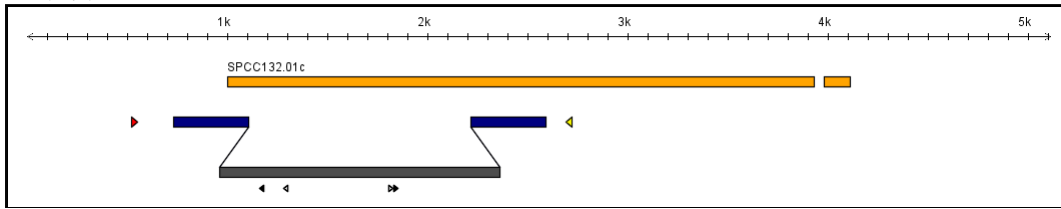

SPCC132.02

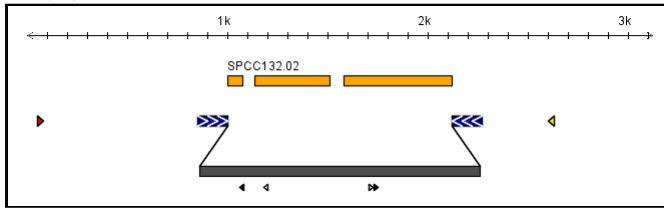

SPCC132.03

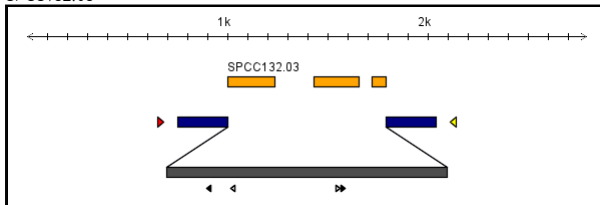

SPCC1322.01

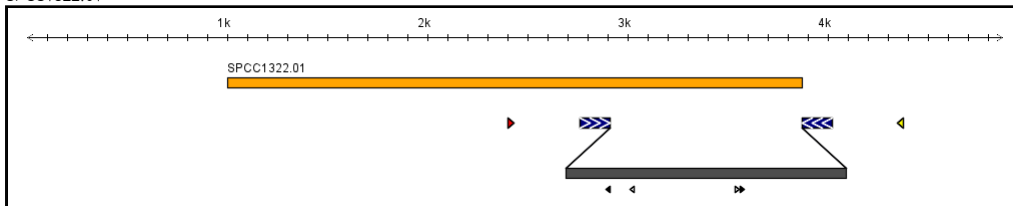

SPCC1322.02

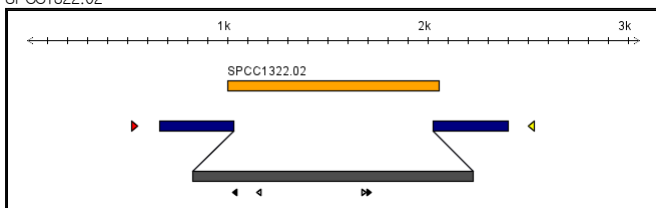

SPCC1322.04

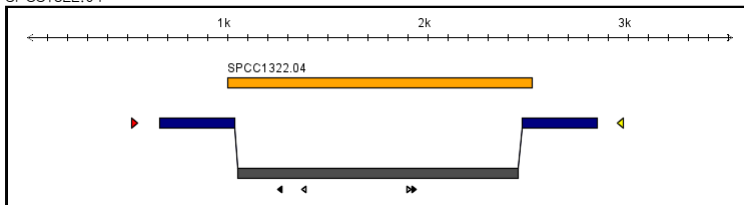

SPCC1322.05c

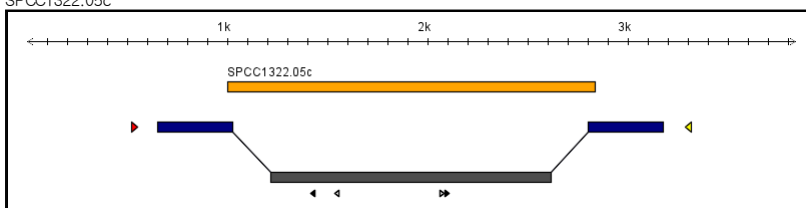

SPCC1322.07c

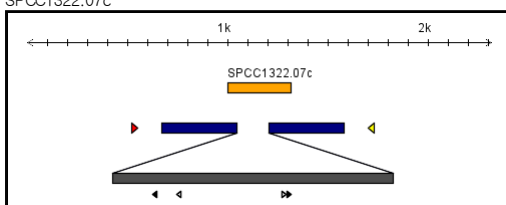

SPCC1322.09

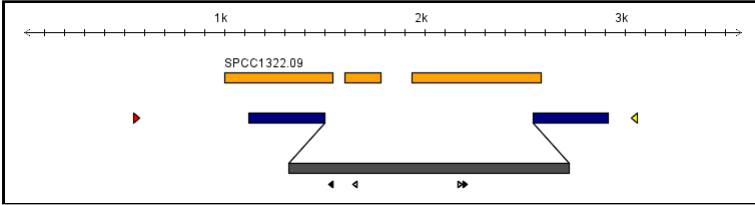

SPCC1322.10

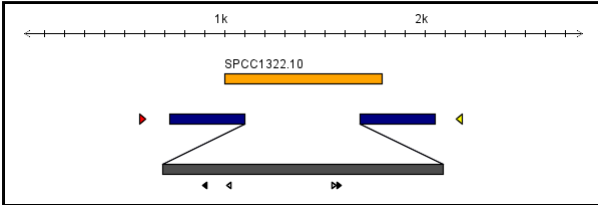

SPCC1322.11

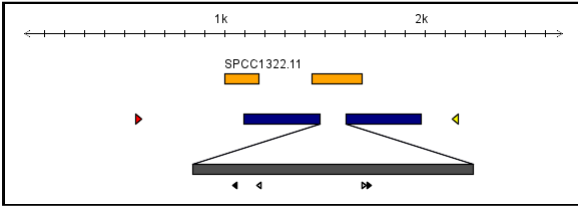

SPCC1322.15

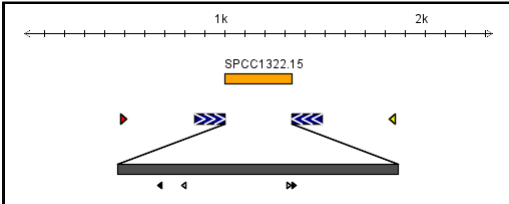

SPCC1322.16

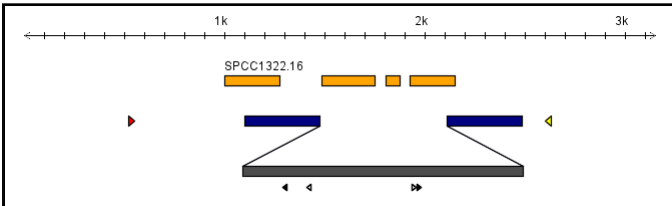

SPCC1393.02c

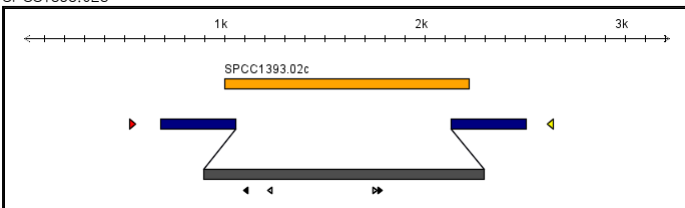

SPCC1393.03

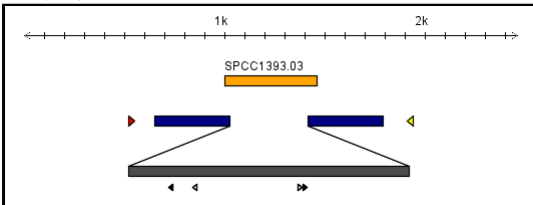

SPCC1393.04

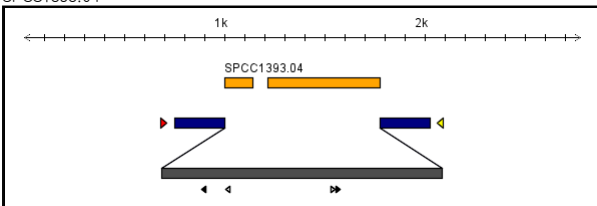

SPCC1393.06c

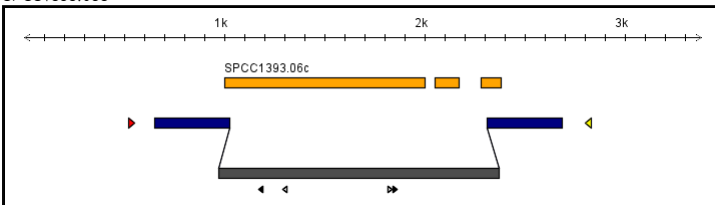

SPCC1393.08

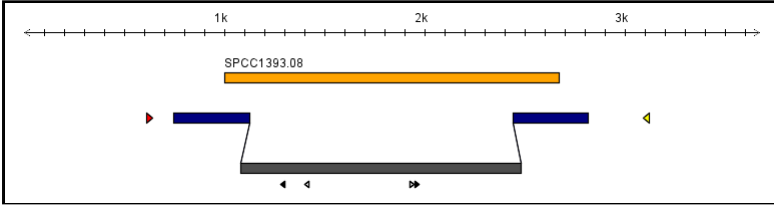

SPCC1393.09c

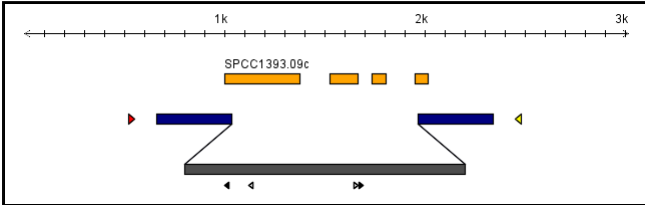

SPCC1393.10

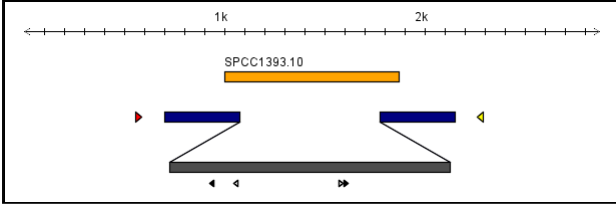

SPCC1393.11

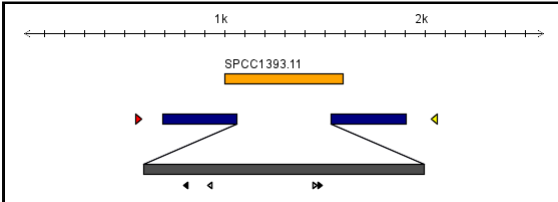

SPCC1393.12

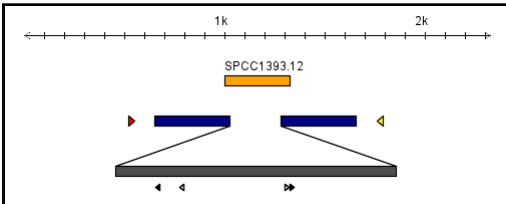

SPCC1393.13

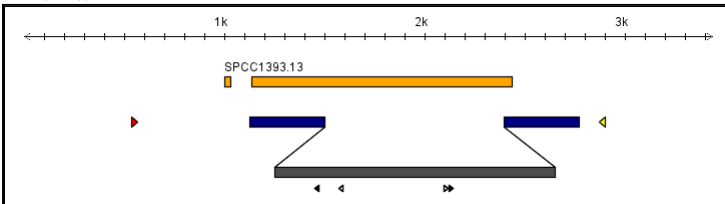

SPCC13B11.01

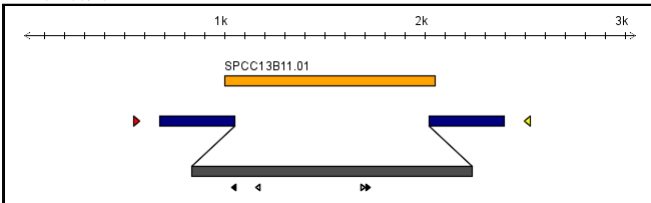

SPCC13B11.03c

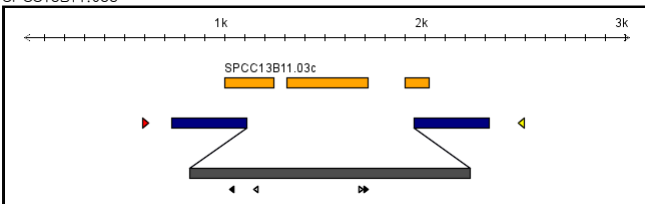

SPCC13B11.04c

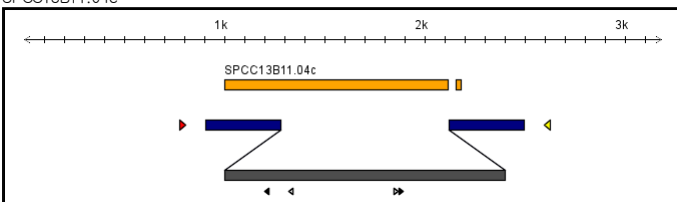

SPCC1442.02

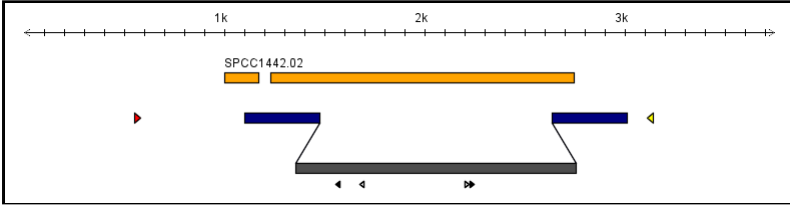

SPCC1442.03

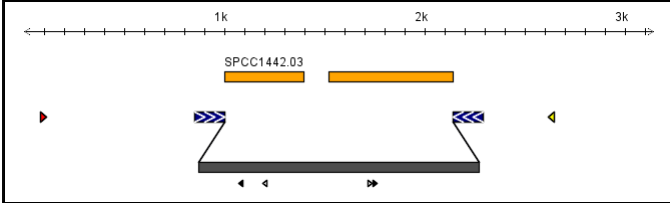

SPCC1442.04c

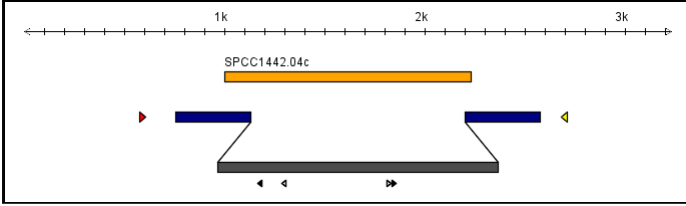

SPCC1442.05c

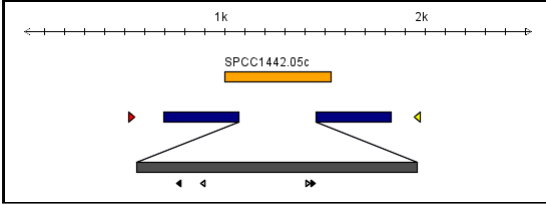

SPCC1442.06

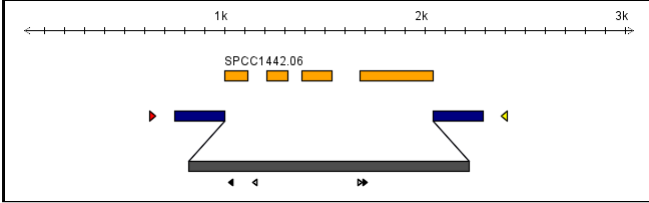

SPCC1442.07c

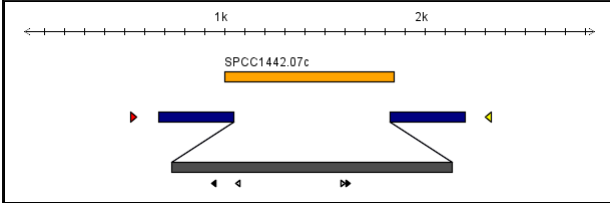

SPCC1442.08c

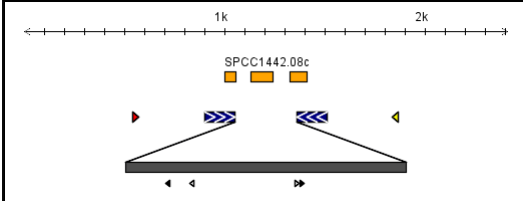

SPCC1442.09

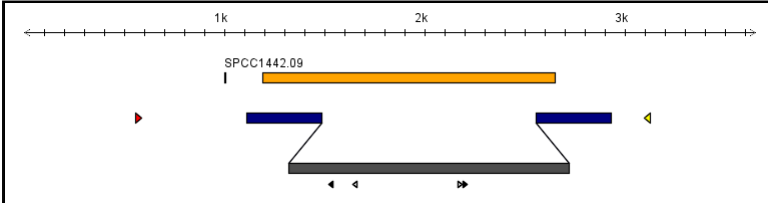

SPCC1442.10c

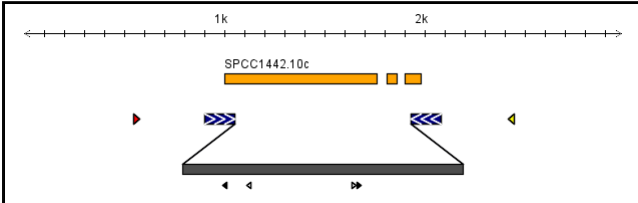

SPCC1442.11c

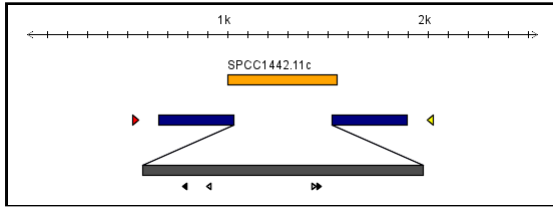

SPCC1442.12

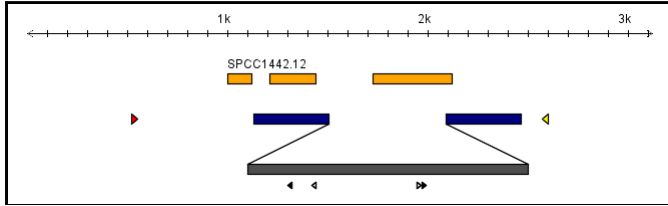

SPCC1442.13c

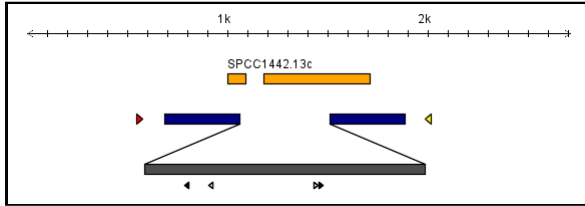

SPCC1442.14c

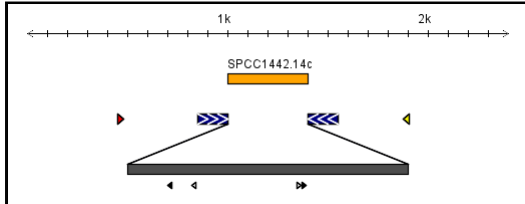

SPCC1442.15c

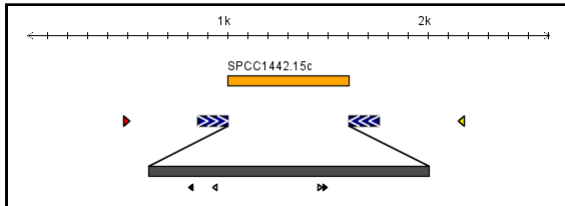

SPCC1442.16c

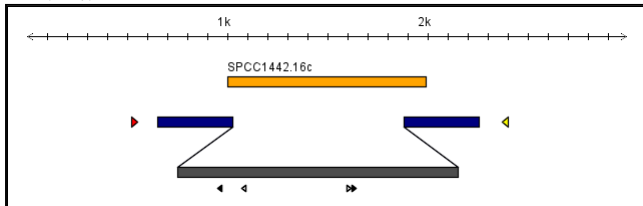

SPCC1442.17c

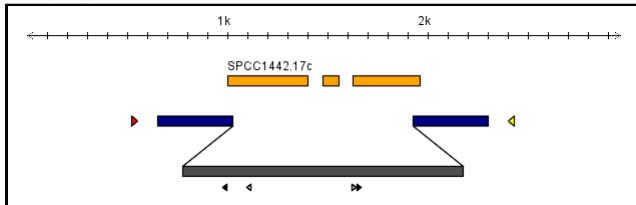

SPCC1450.02

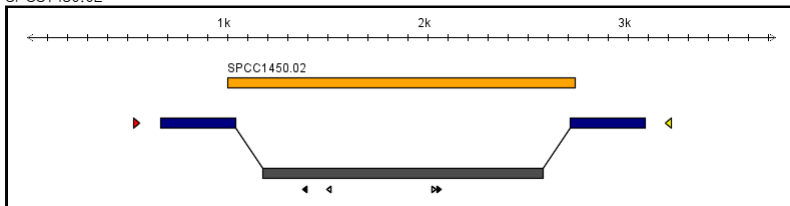

SPCC1450.03

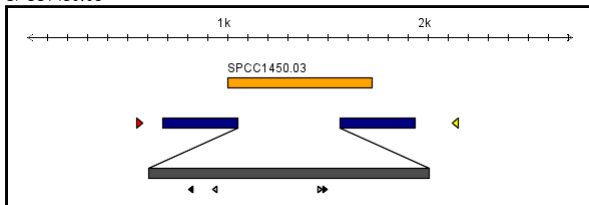

SPCC1450.04

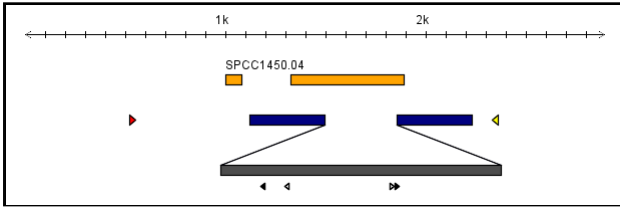

SPCC1450.05c

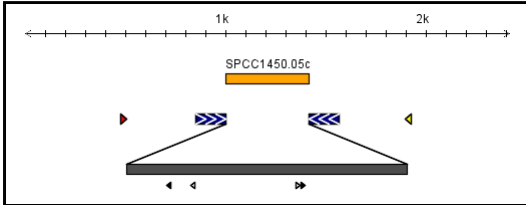

SPCC1450.06c

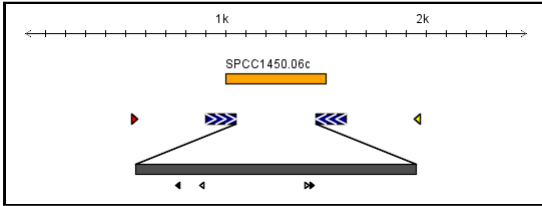

SPCC1450.07c

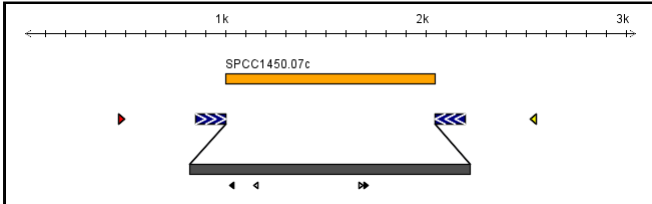

SPCC1450.08c

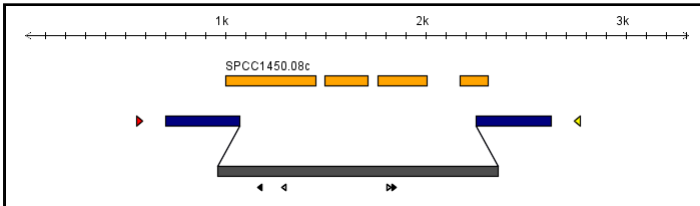

SPCC1450.09c

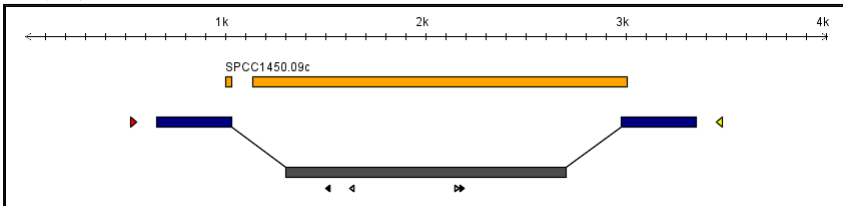

SPCC1450.10c

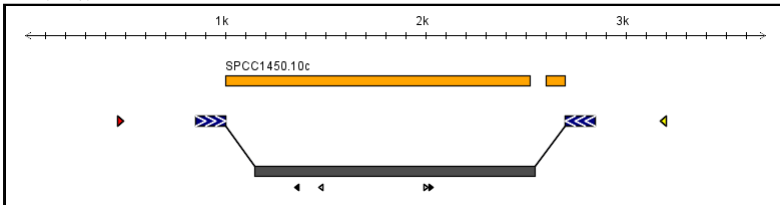

SPCC1450.13c

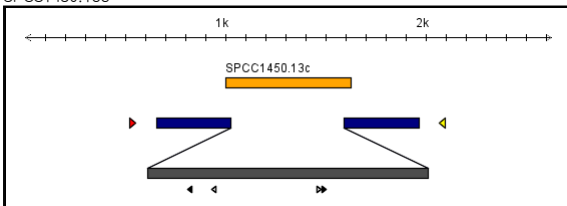

SPCC1450.14c

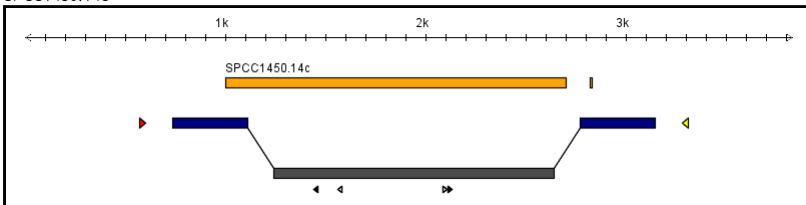

SPCC1450.15

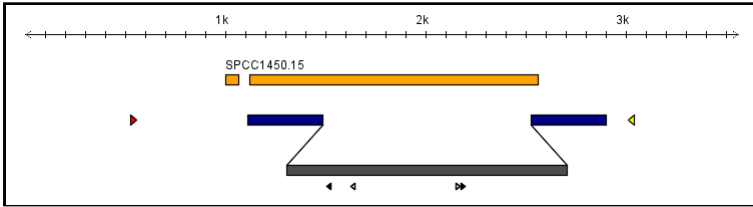

SPCC1450.16c

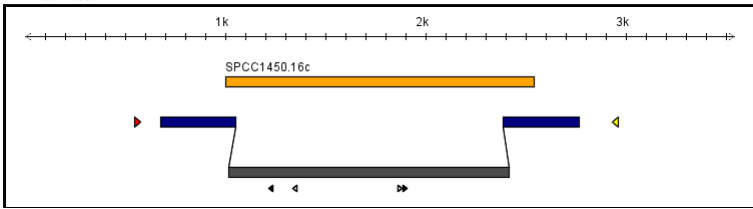

SPCC1494.01

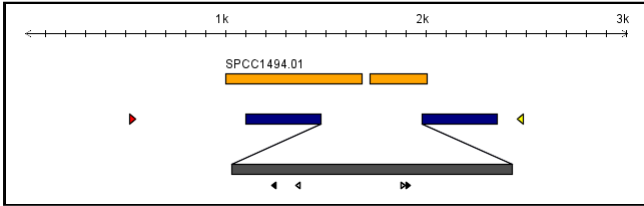

SPCC1494.02c

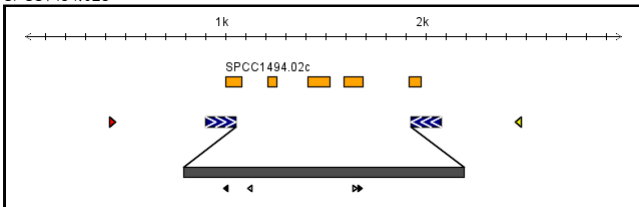

SPCC1494.03

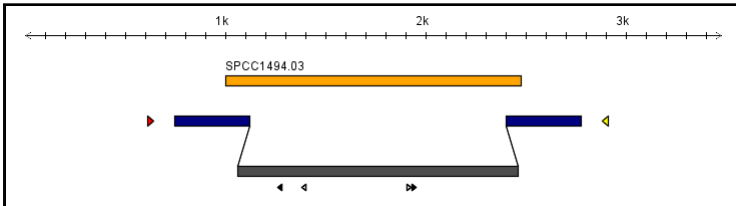

SPCC1494.04c

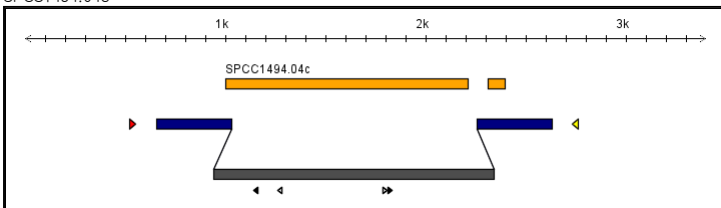

SPCC1494.05c

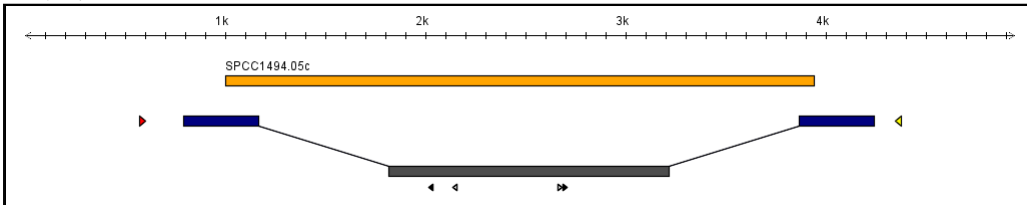

SPCC1494.06c

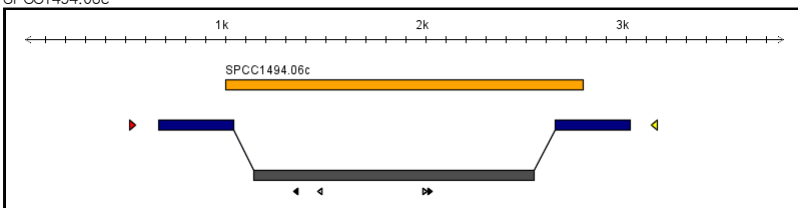

SPCC1494.08c

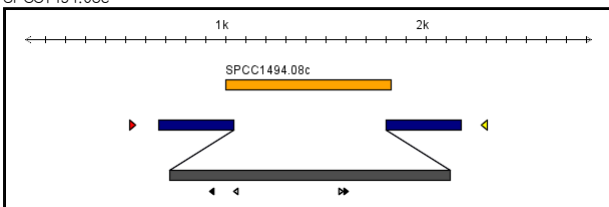



SPCC1494.09c

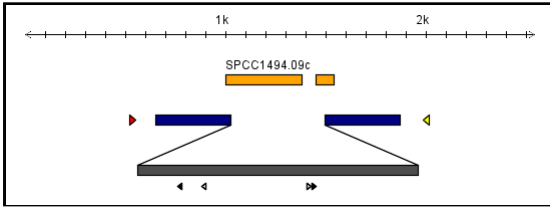

SPCC1494.10

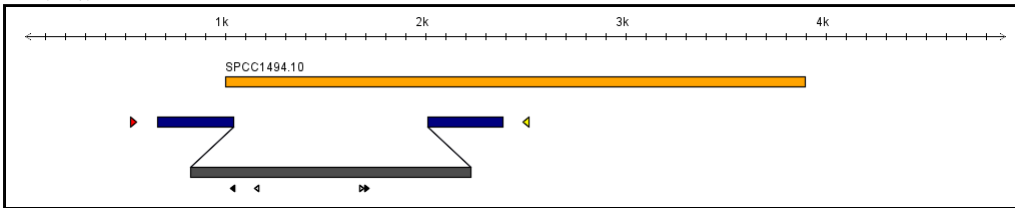

SPCC14G10.01

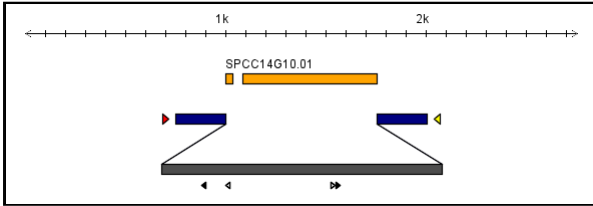

SPCC14G10.03c

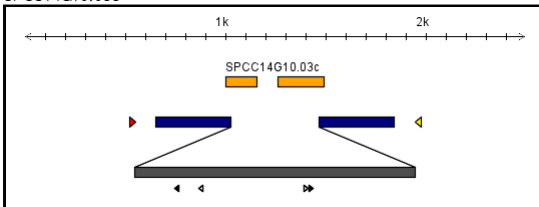

SPCC14G10.04

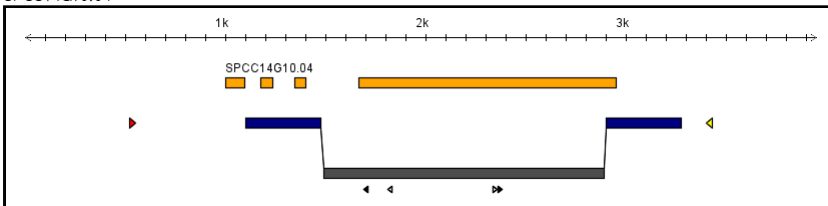

SPCC1529.01

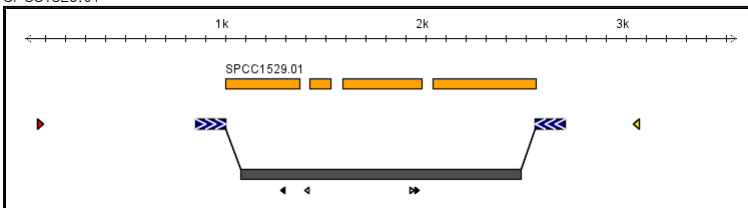

SPCC162.01c

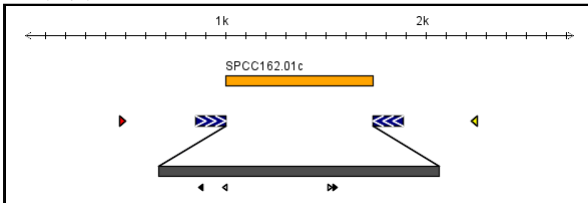

SPCC162.02c

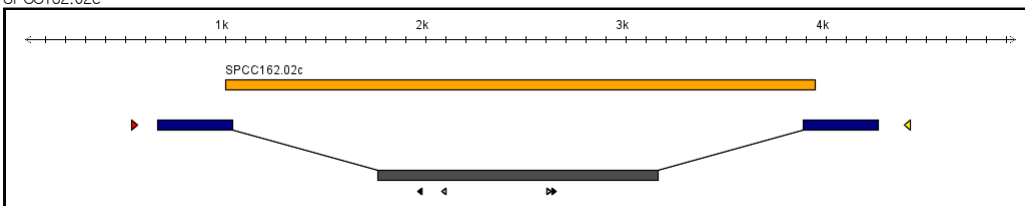

SPCC162.03

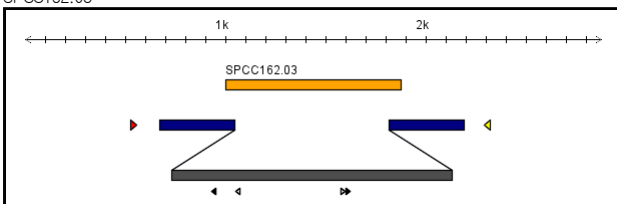

SPCC162.04c

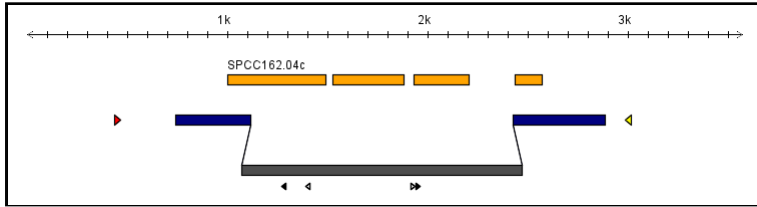

SPCC162.05

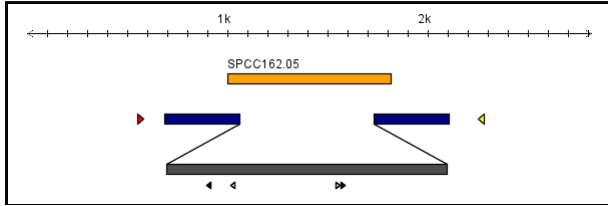

SPCC162.06c

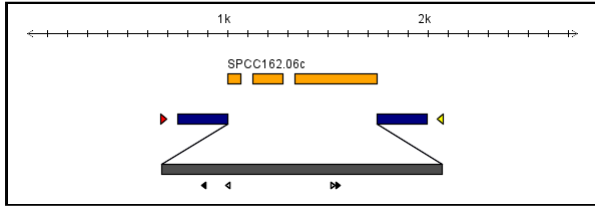

SPCC162.07

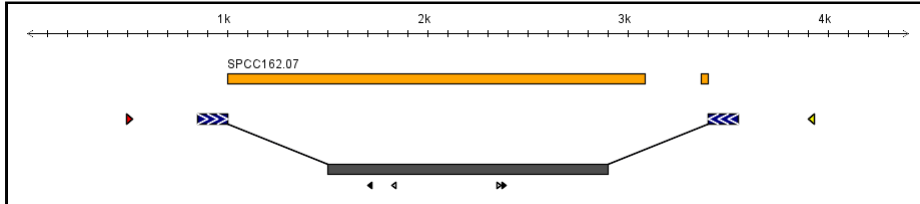

SPCC162.10

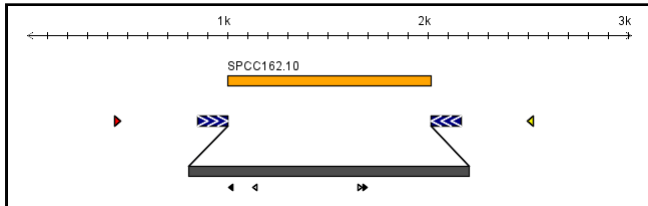

SPCC162.11c

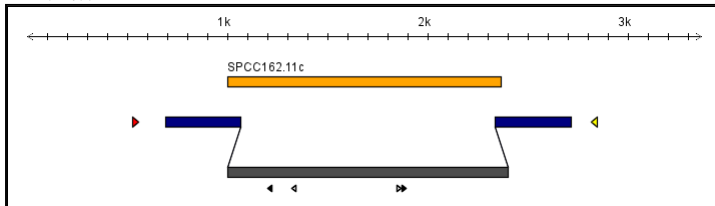

SPCC162.12

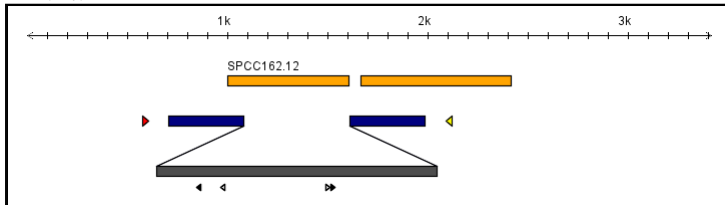

SPCC1620.01c

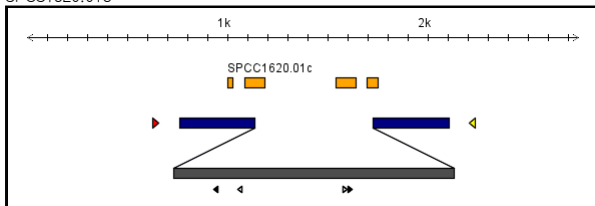

SPCC1620.02

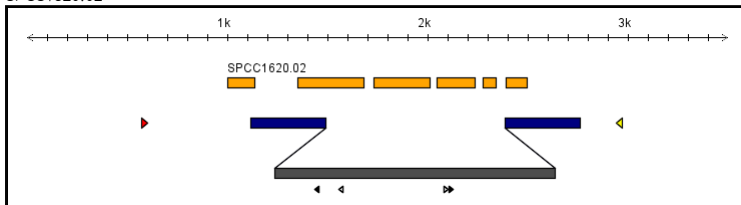

SPCC1620.03

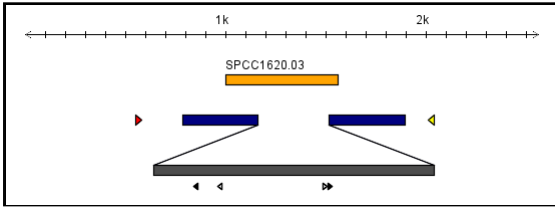

SPCC1620.04c

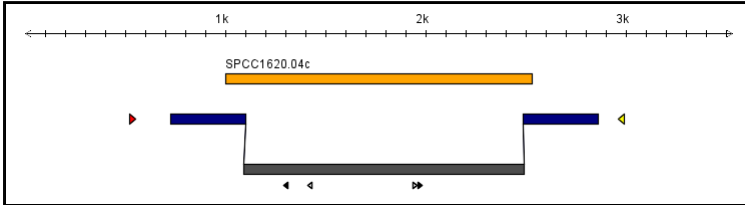

SPCC1620.05

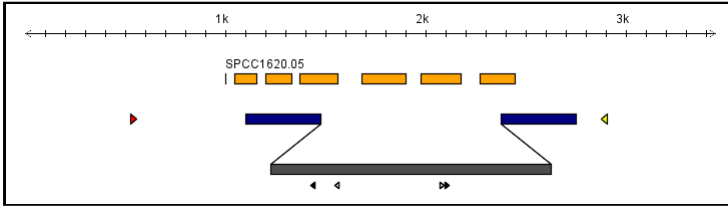

SPCC1620.06c

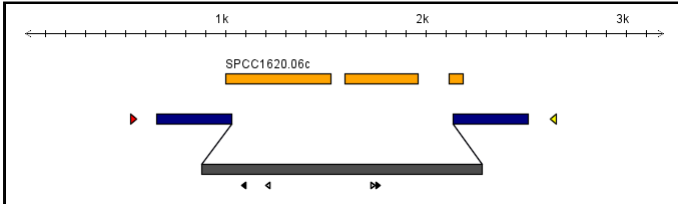

SPCC1620.07c

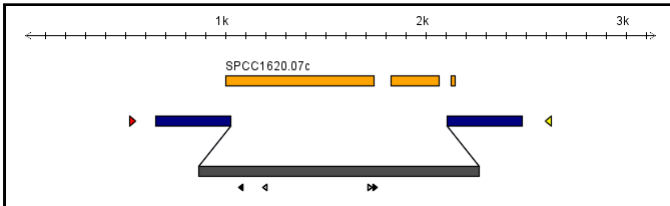

SPCC1620.08

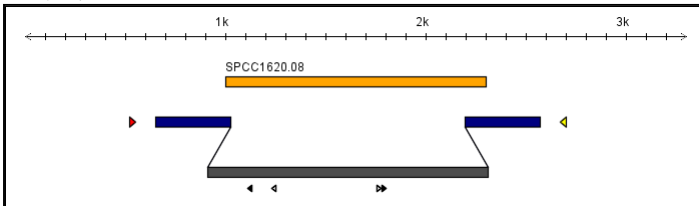

SPCC1620.09c

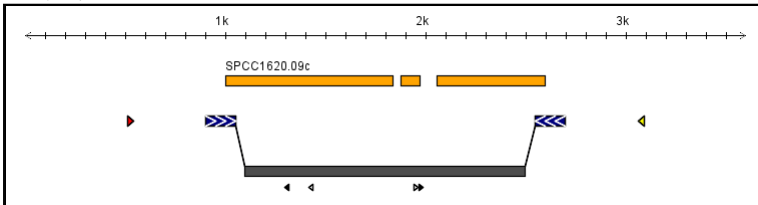

SPCC1620.10

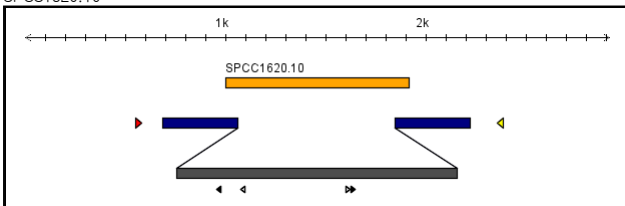

SPCC1620.12c

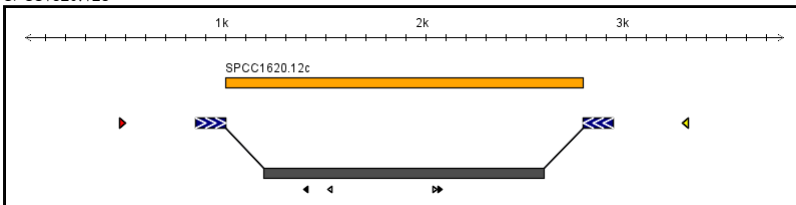

SPCC1620.13

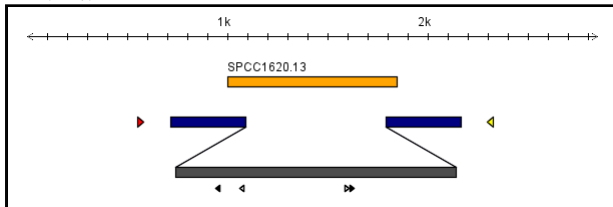

SPCC1672.01

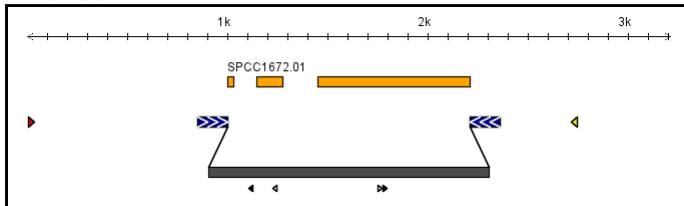

SPCC1672.02c

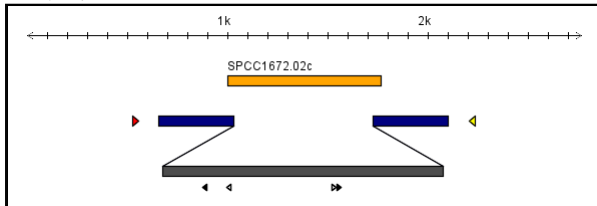

SPCC1672.03c

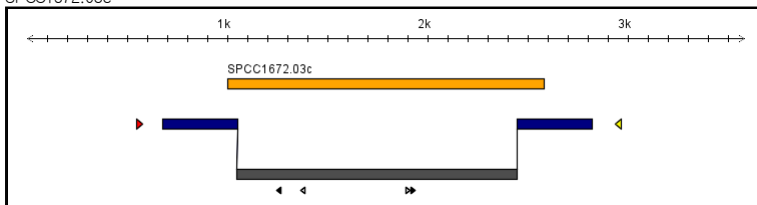

SPCC1672.04c

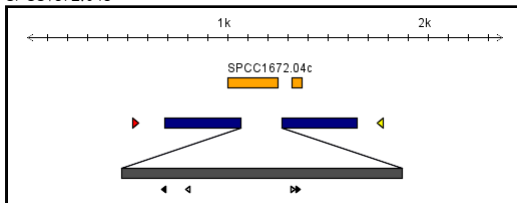

SPCC1672.05c

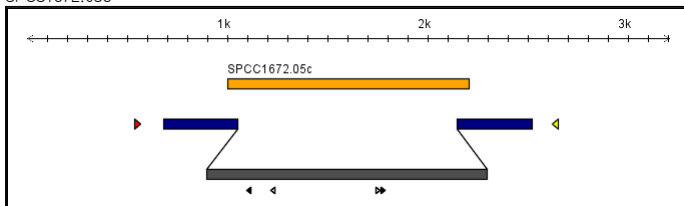

SPCC1672.06c

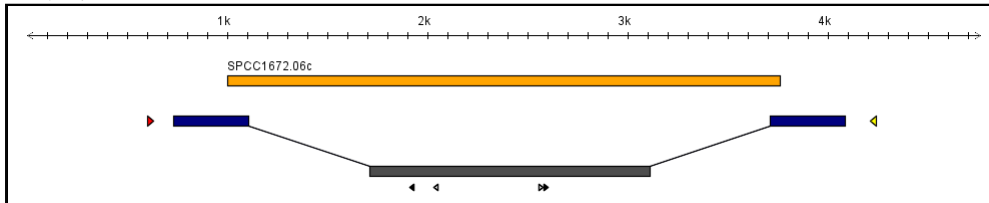

SPCC1672.07

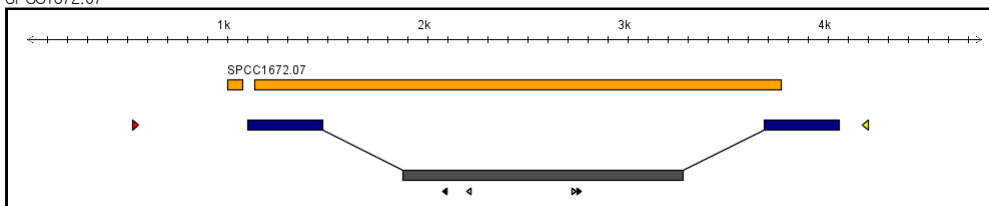

SPCC1672.08c

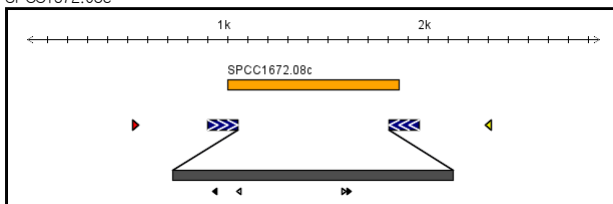

SPCC1672.09

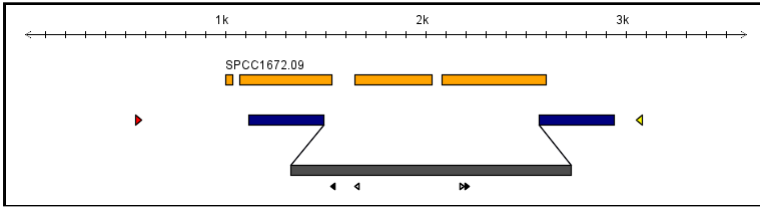

SPCC1672.10

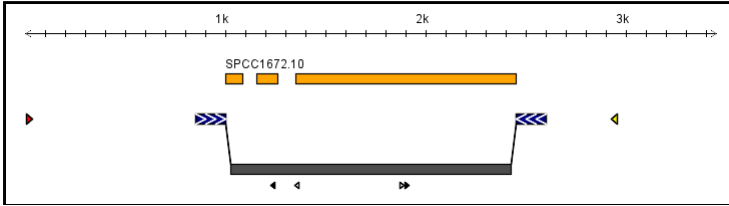

SPCC1672.12c

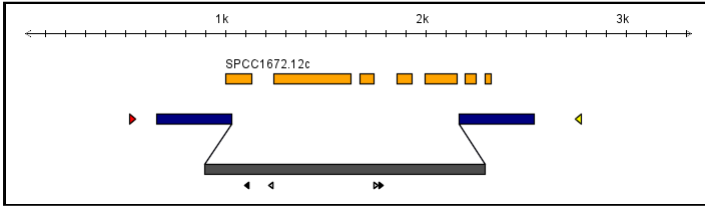

SPCC1682.01

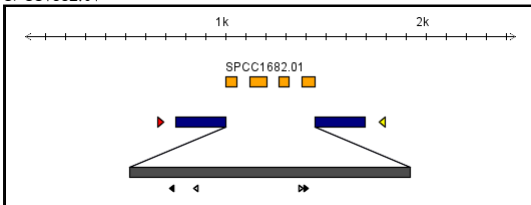

SPCC1682.03c

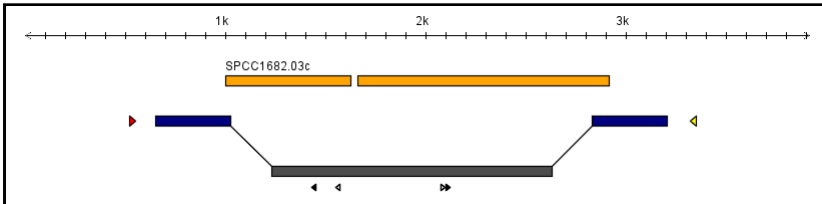

SPCC1682.04

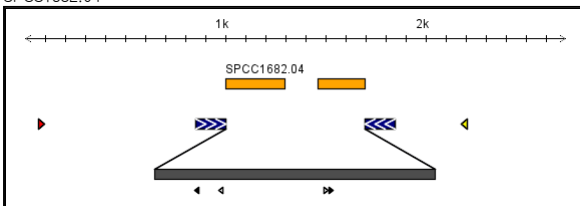

SPCC1682.06

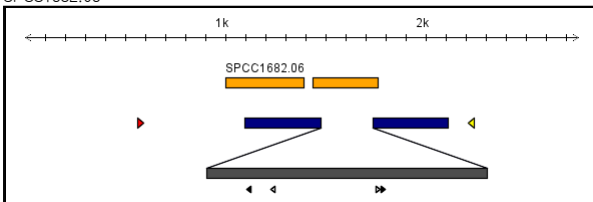

SPCC1682.07

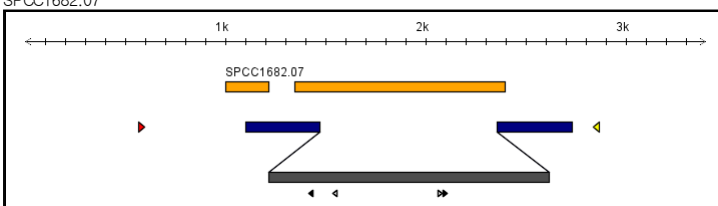

SPCC1682.09c

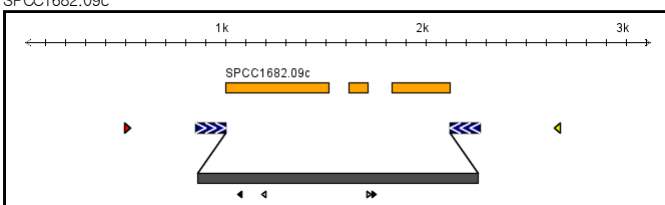

SPCC1682.10

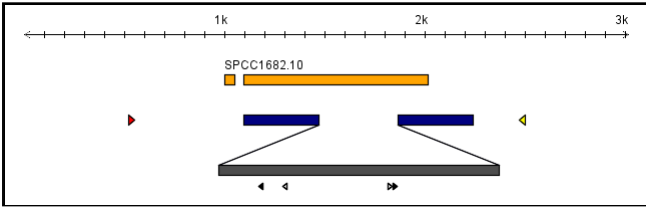

SPCC1682.11c

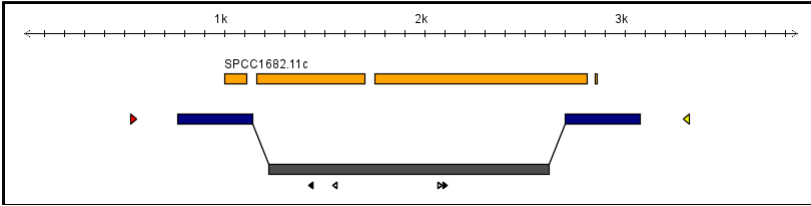

SPCC1682.12c

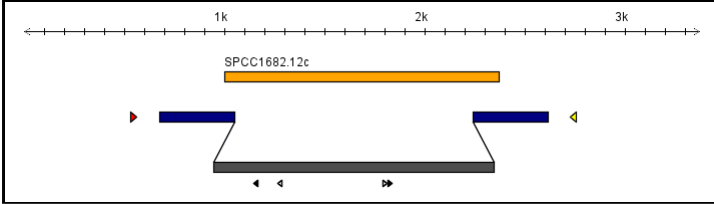

SPCC1682.13

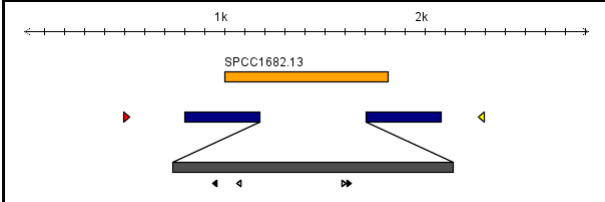

SPCC1682.14

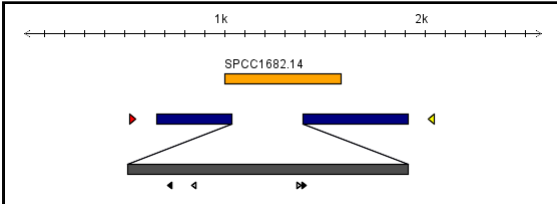

SPCC1682.15

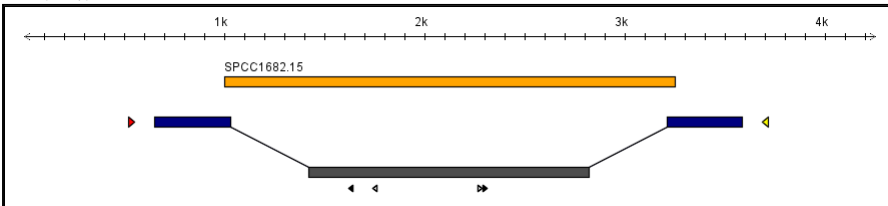

SPCC16A11.01

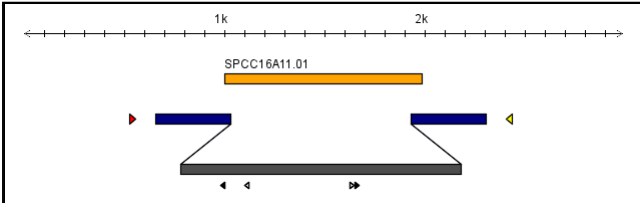

SPCC16A11.02

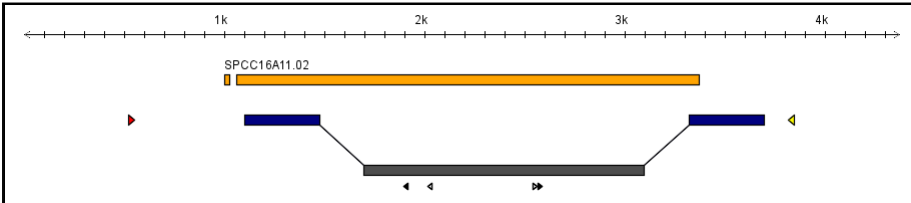

SPCC16A11.03c

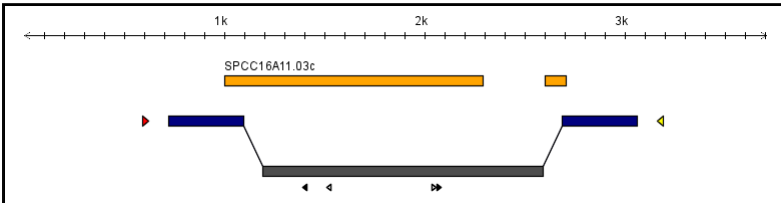

SPCC16A11.04

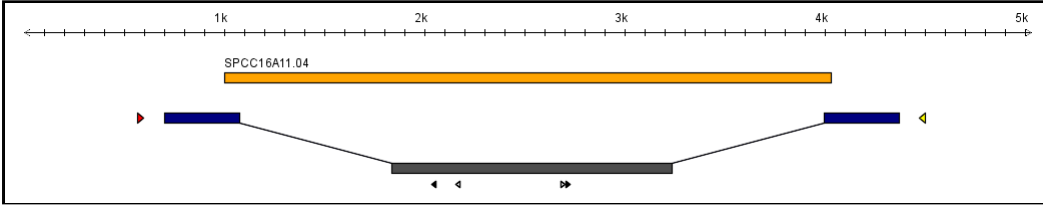

SPCC16A11.05c

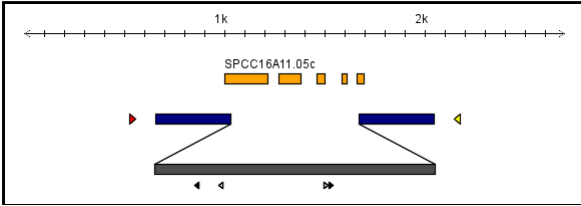

SPCC16A11.06c

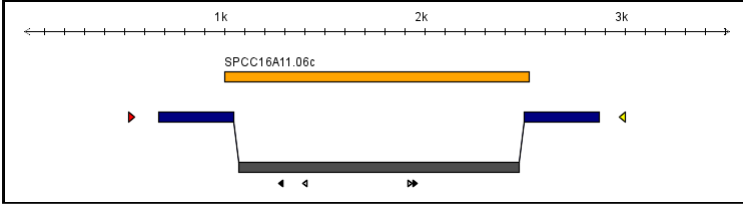

SPCC16A11.07

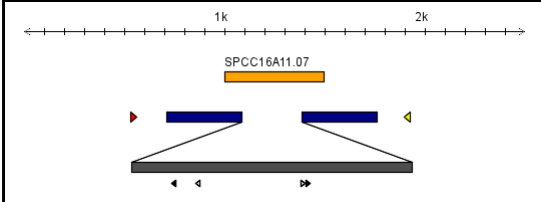

SPCC16A11.08

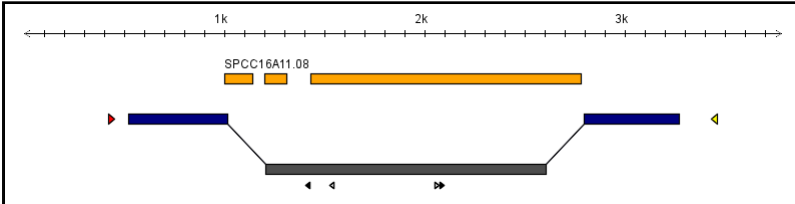

SPCC16A11.09c

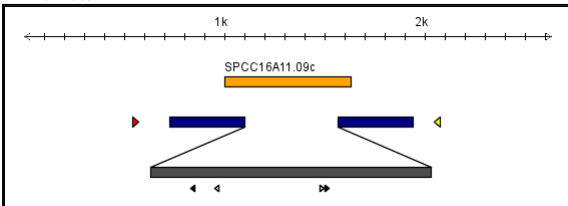

SPCC16A11.10c

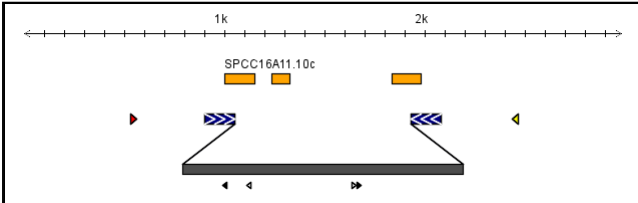

SPCC16A11.11

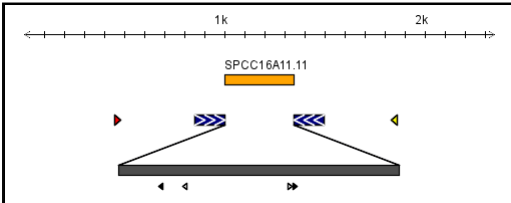

SPCC16A11.13

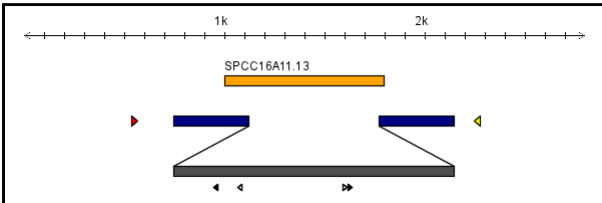

SPCC16A11.14

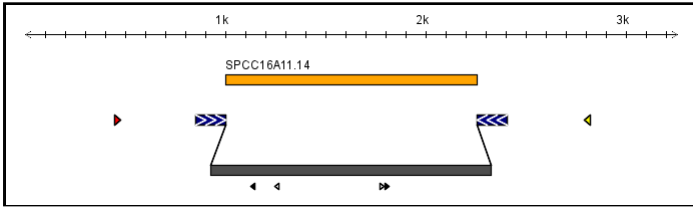

SPCC16A11.15c

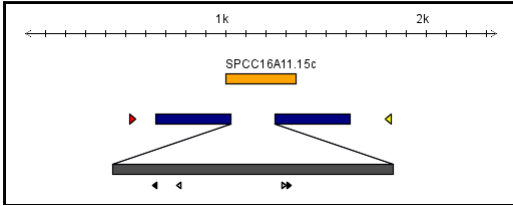

SPCC16A11.16c

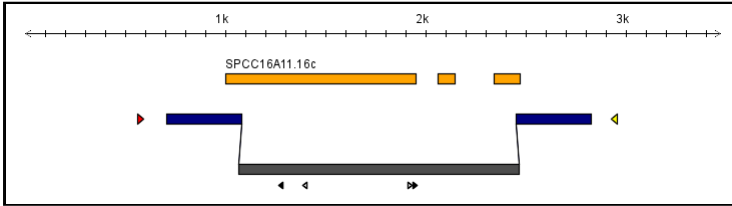

SPCC16A11.17

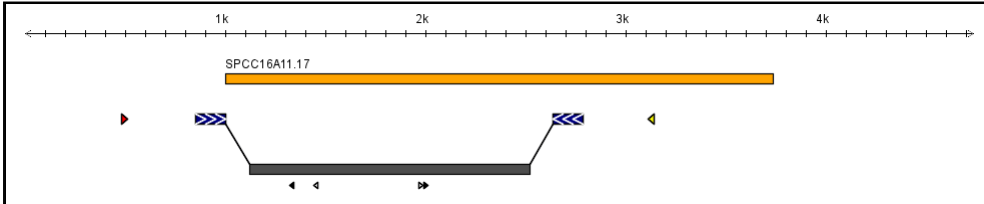

SPCC16C4.01

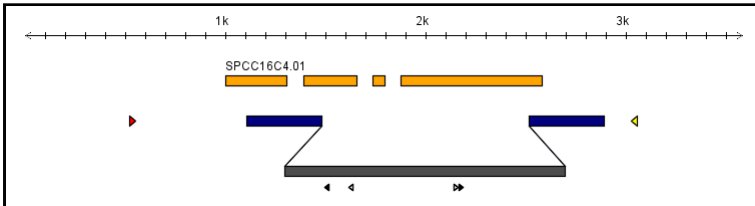

SPCC16C4.02c

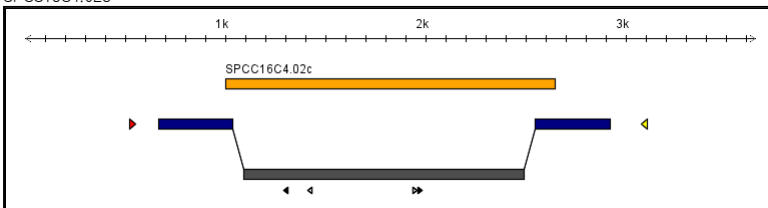

SPCC16C4.03

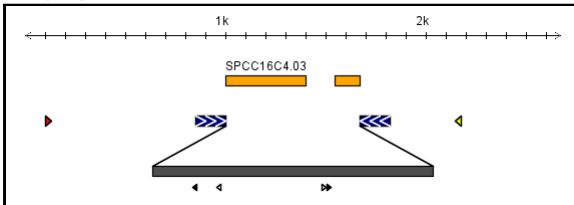

SPCC16C4.04

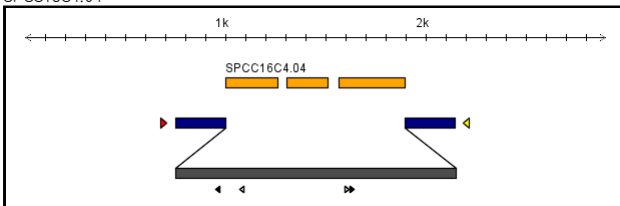

SPCC16C4.06c

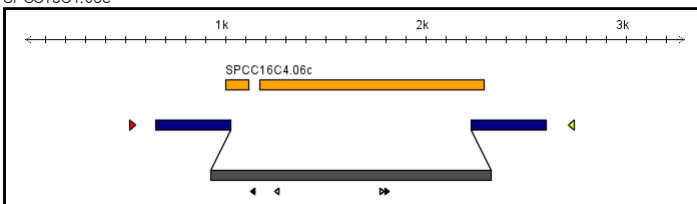



SPCC16C4.07

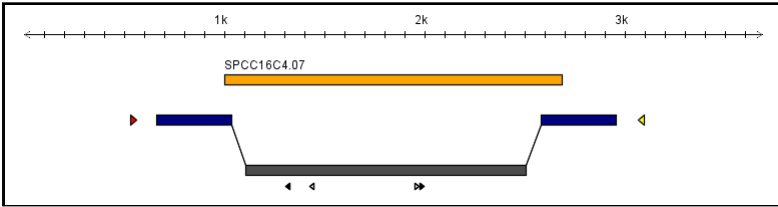

SPCC16C4.08c

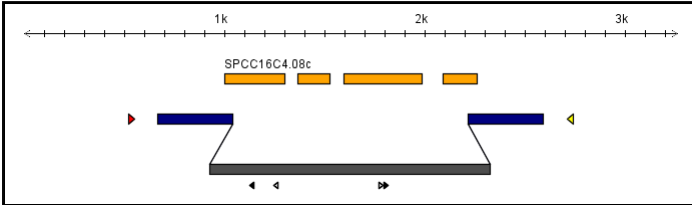

SPCC16C4.09

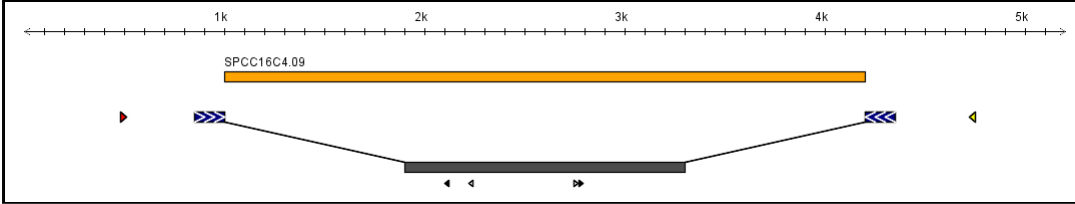

SPCC16C4.10

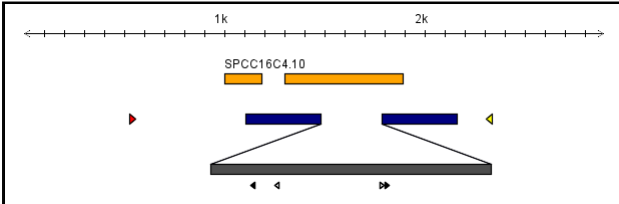

SPCC16C4.11

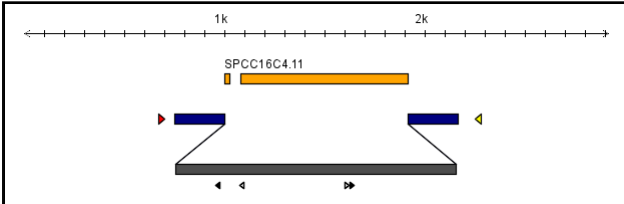

SPCC16C4.12

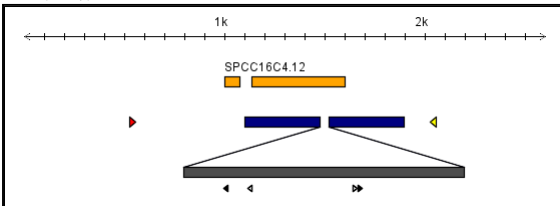

SPCC16C4.13c

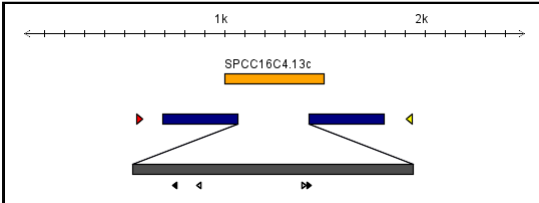

SPCC16C4.15

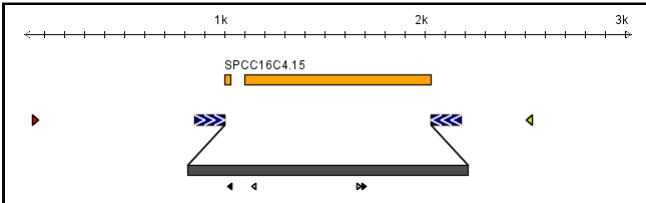

SPCC16C4.16c

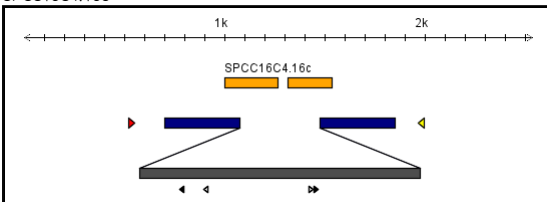

SPCC16C4.17

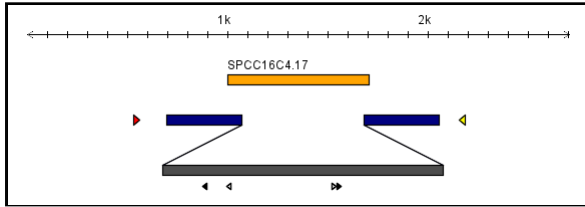

SPCC16C4.18c

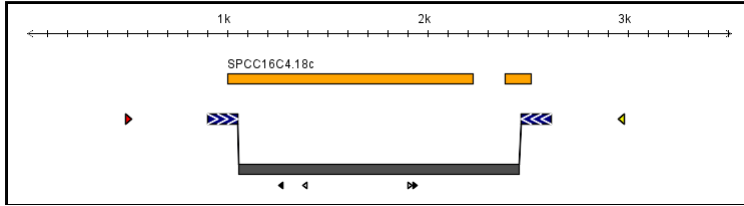

SPCC16C4.19

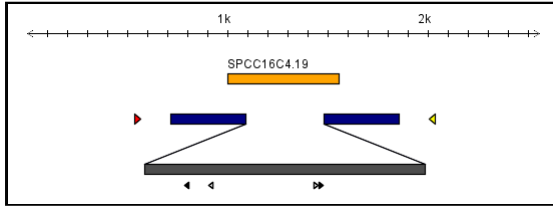

SPCC16C4.20c

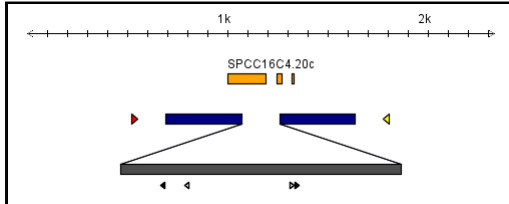

SPOC1739.02c

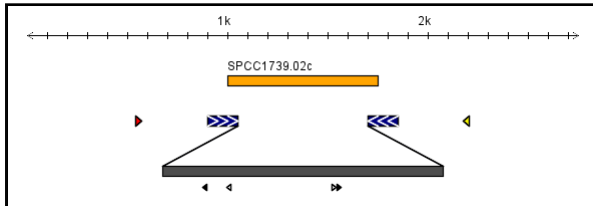

SPOC1739.04c

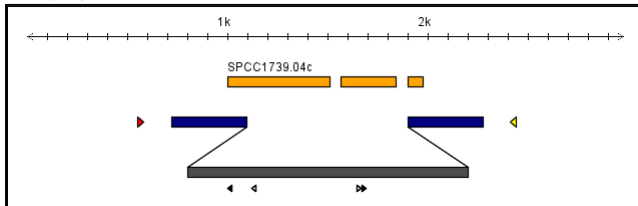

SPOC1739.05

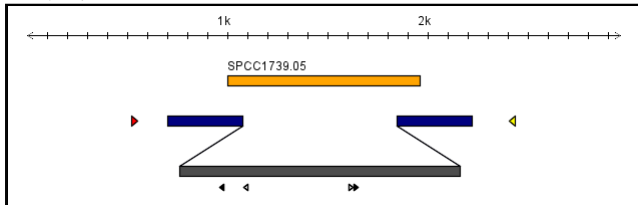

SPOC1739.06c

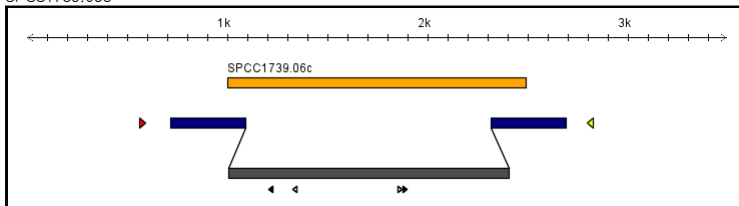

SPOC1739.07

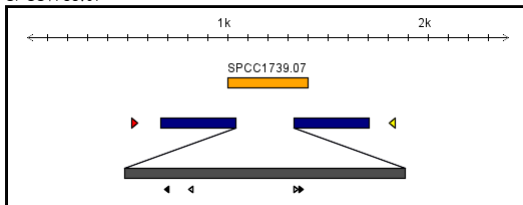

SPCC1739.08c

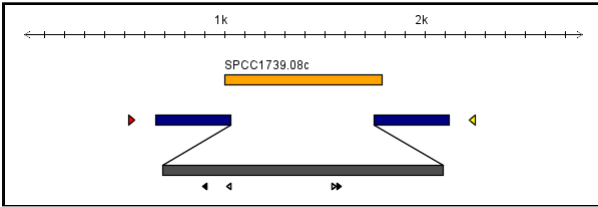

SPCC1739.10

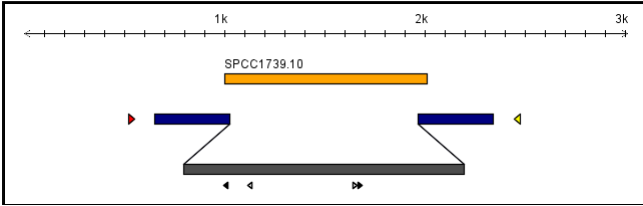

SPCC1739.12

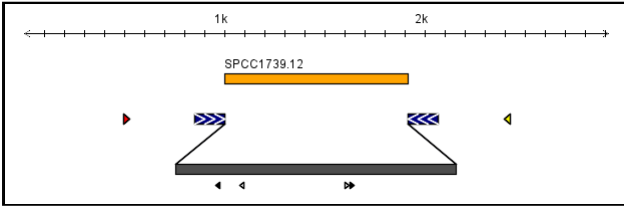

SPCC1739.13

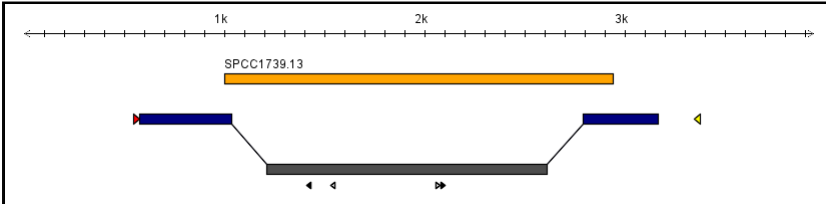

SPCC1739.15

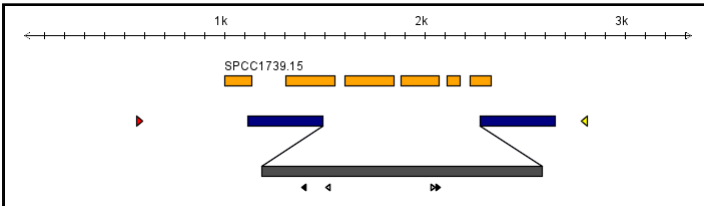

SPCC1753.02c

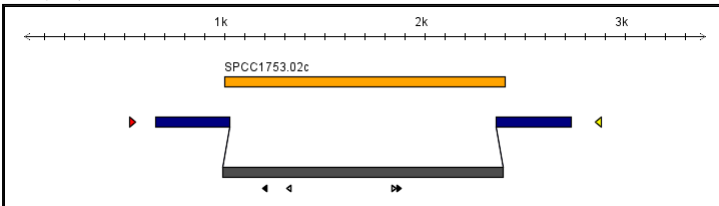

SPCC1753.03c

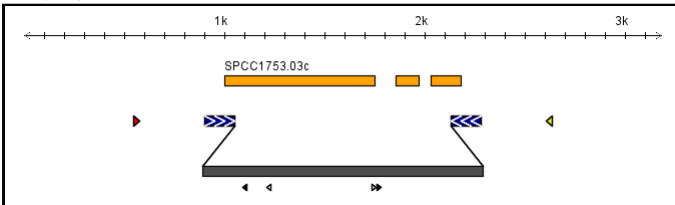

SPCC1753.04

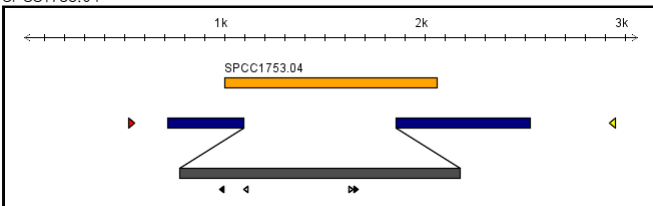

SPCC1753.05

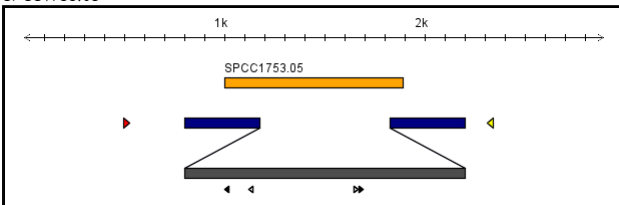

SPCC1795.02c

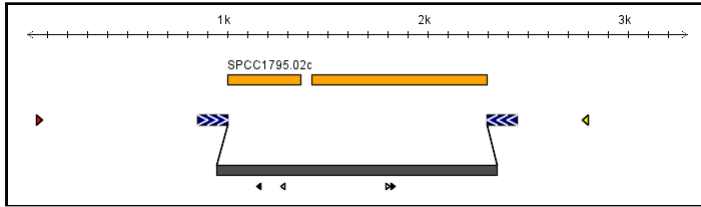

SPCC1795.03

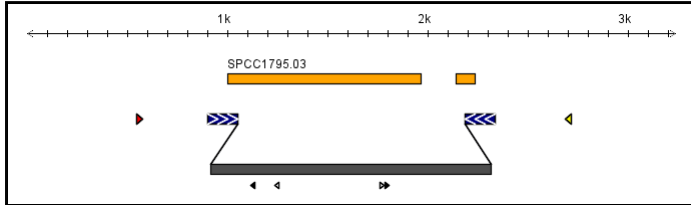

SPCC1795.04c

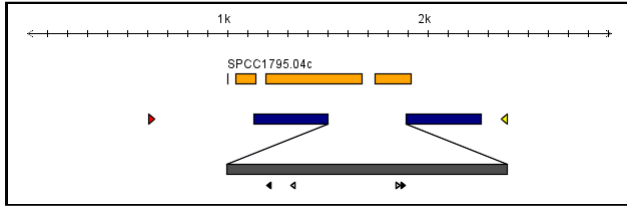

SPCC1795.05c

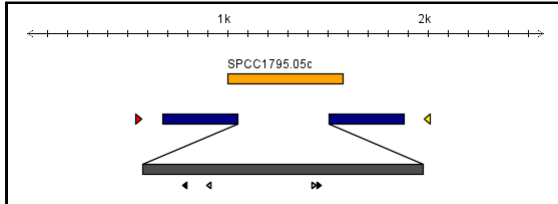

SPCC1795.06

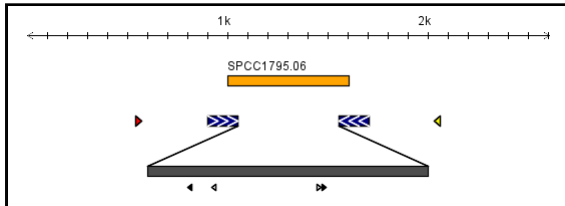

SPCC1795.07

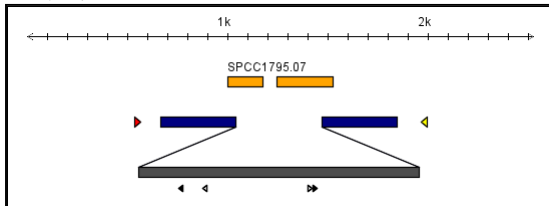

SPCC1795.09

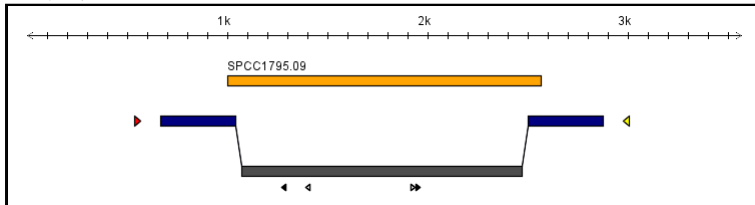

SPCC1795.10c

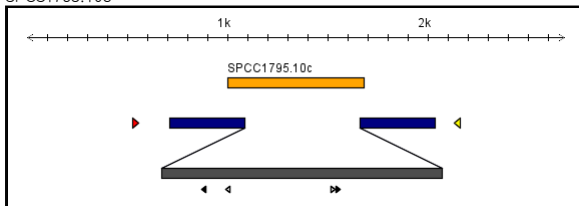

SPCC1795.11

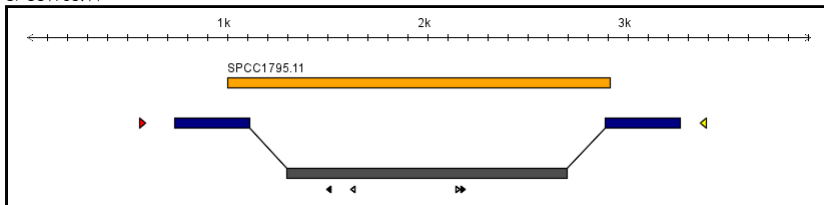

SPCC1795.12c

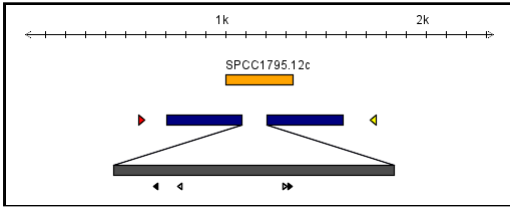

SPCC18.02

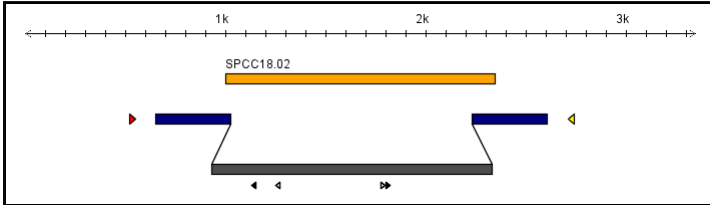

SPCC18.04

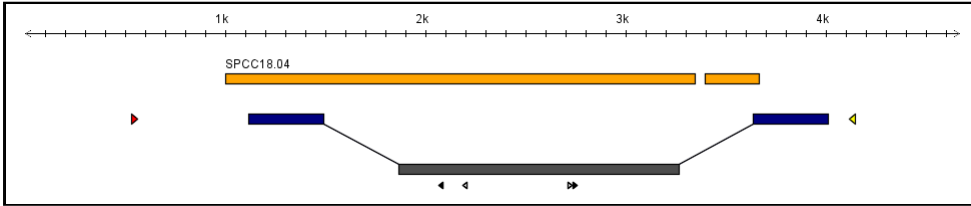

SPCC18.05c

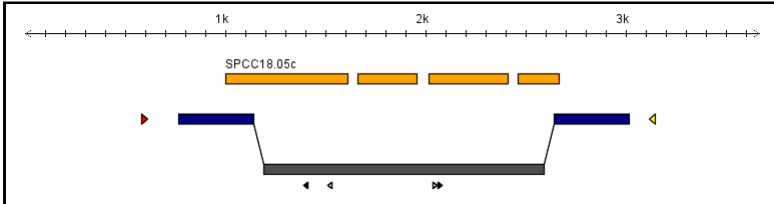

SPCC18.06c

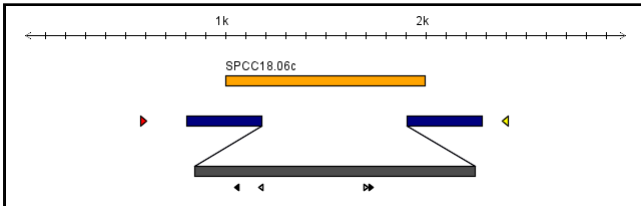

SPCC18.07

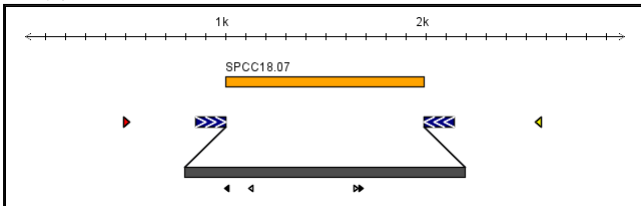

SPCC18.08

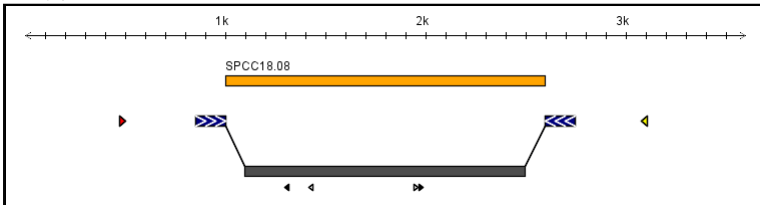

SPCC18.09c

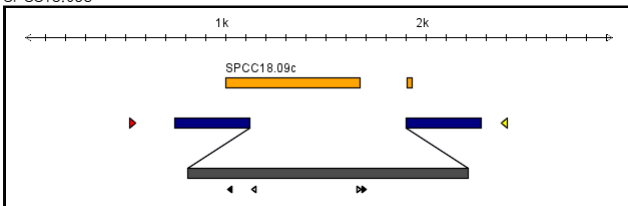

SPCC18.10

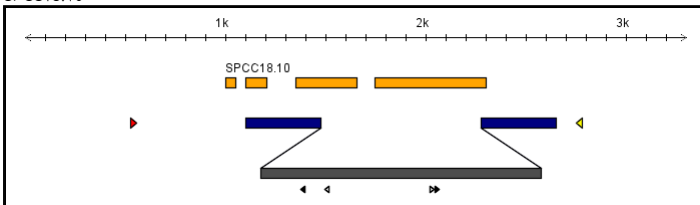

SPCC18.11c

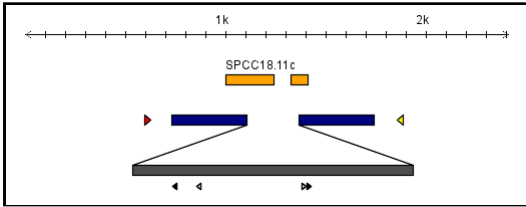

SPCC18.12c

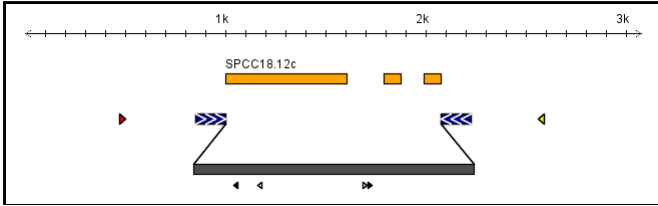

SPCC18.13

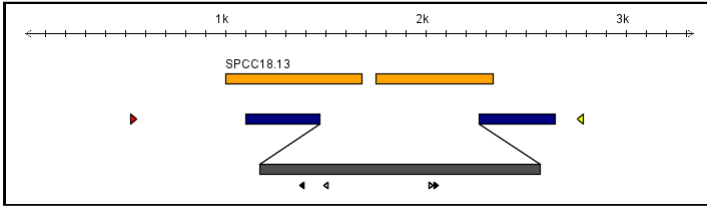

SPCC18.14c

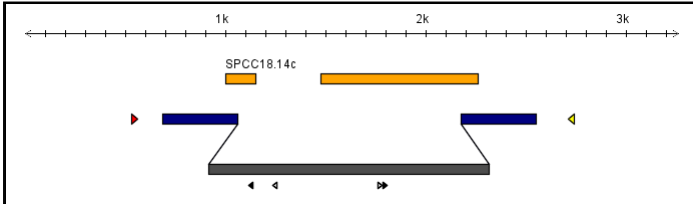

SPCC18.15

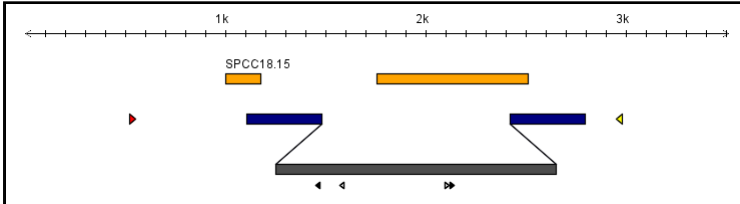

SPCC18.16c

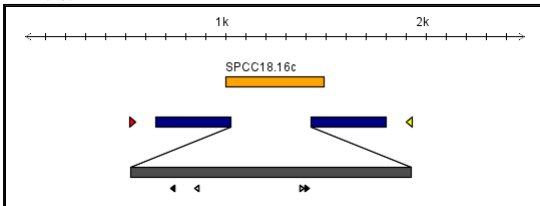

SPCC18.17c

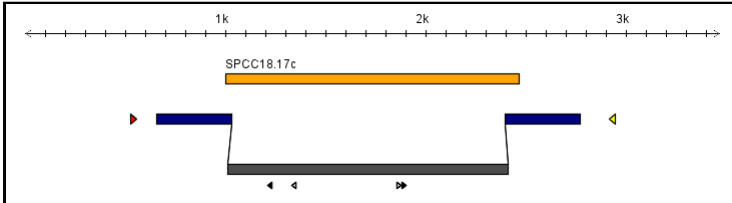

SPCC1827.01c

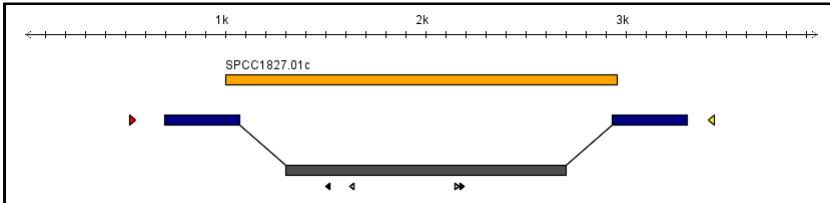

SPCC1827.02c

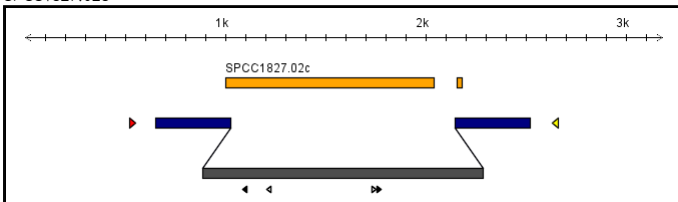

SPCC1827.03c

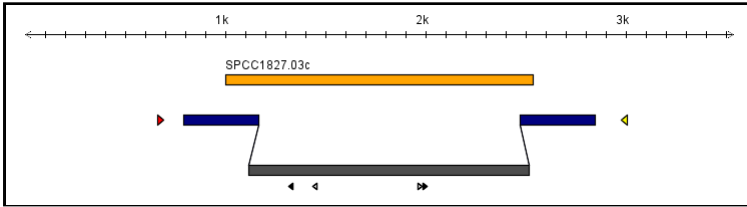

SPCC1827.04

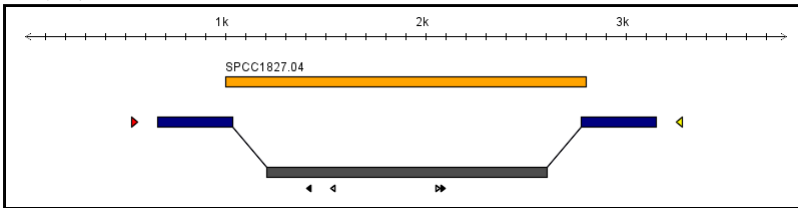

SPCC1827.05c

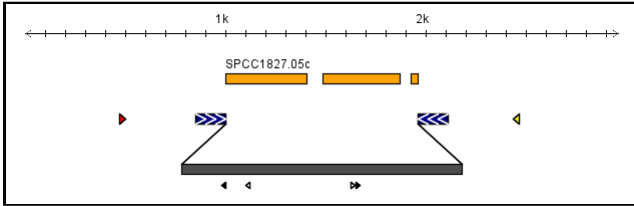

SPCC1827.06c

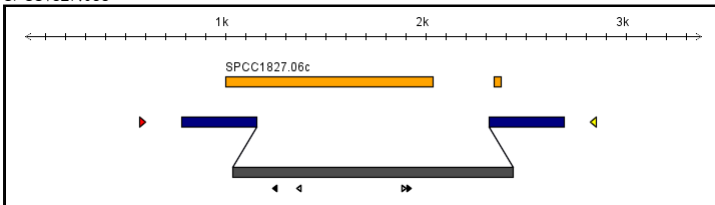

SPCC1827.08c

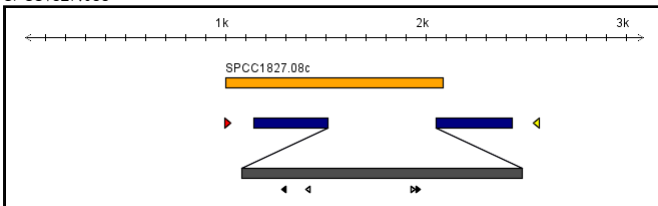

SPCC1840.01c

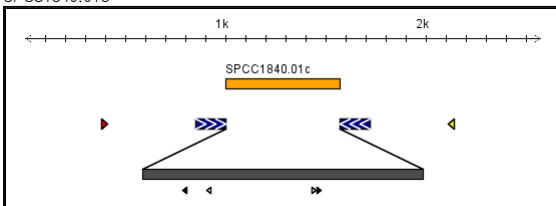

SPCC1840.02c

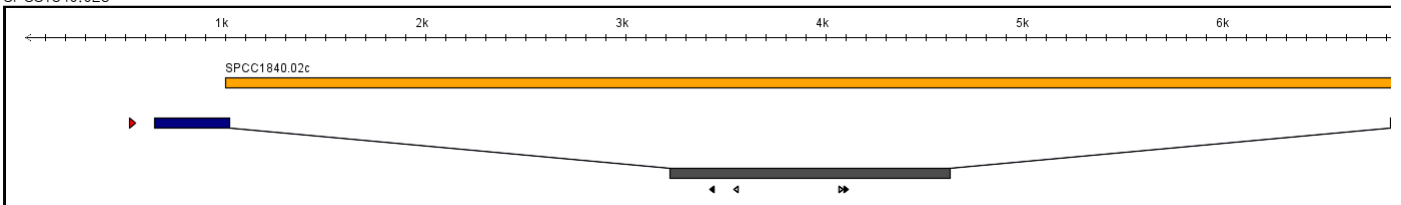

SPCC1840.04

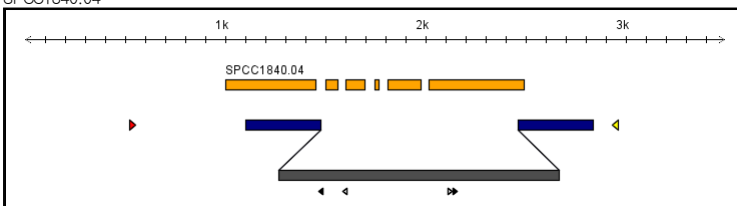

SPCC1840.05c

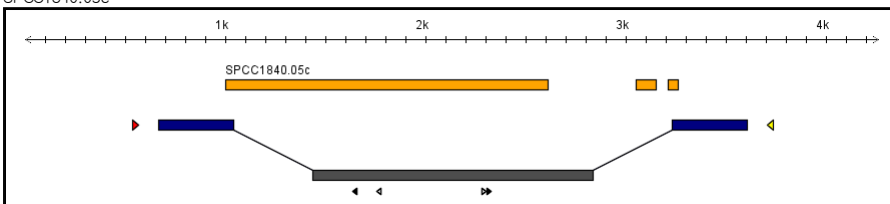

SPCC1840.06

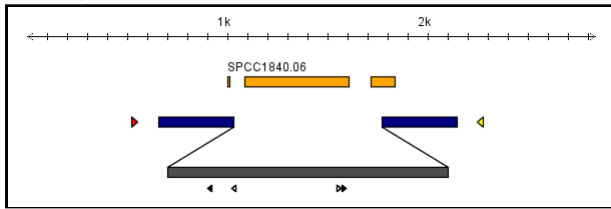

SPCC1840.07c

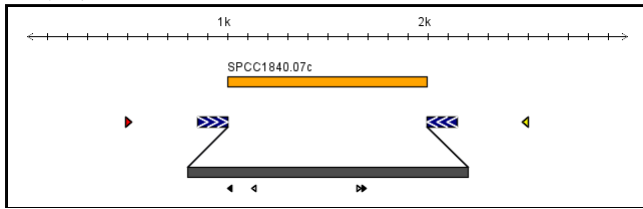

SPCC1840.08c

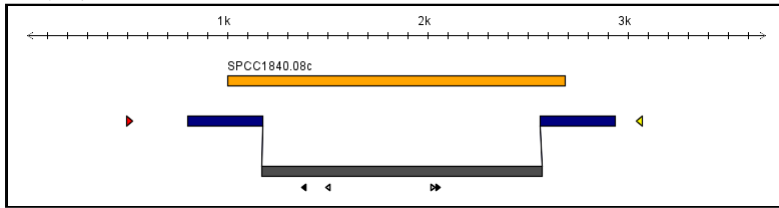

SPCC1840.09

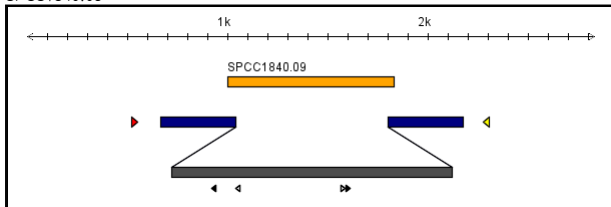

SPCC1840.10

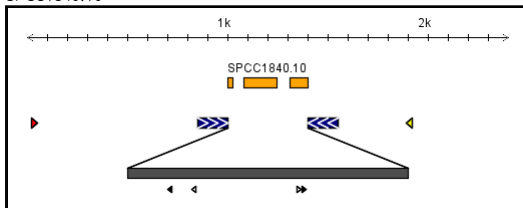

SPCC1840.11

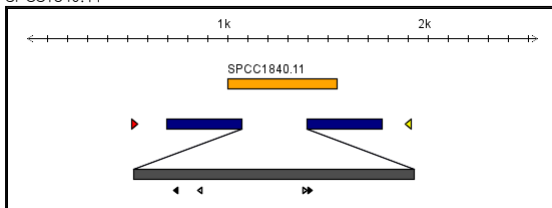

SPCC188.02

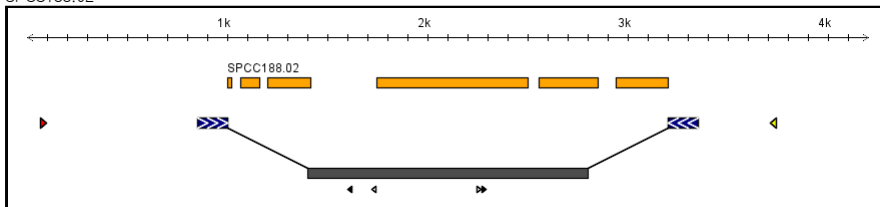

SPCC188.03

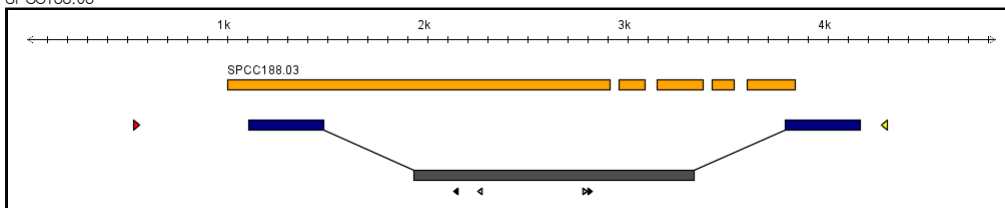

SPCC188.04c

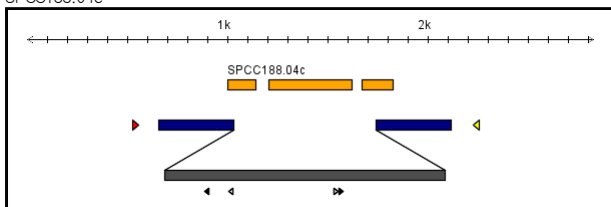



SPCC188.07

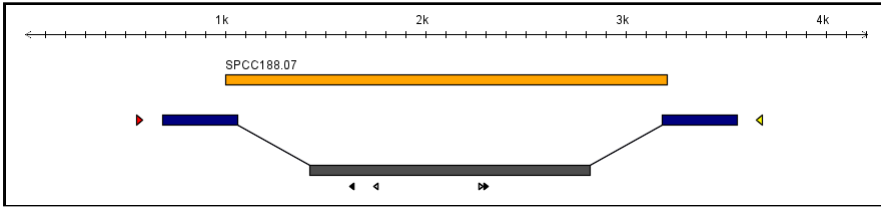

SPCC188.09c

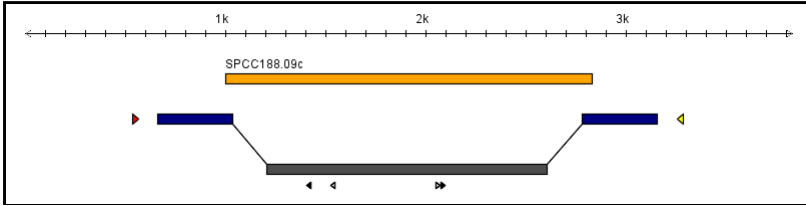

SPCC188.11

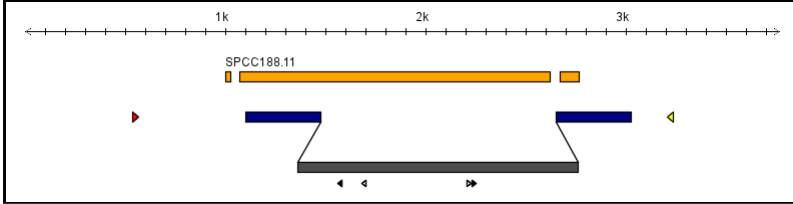

SPCC188.12

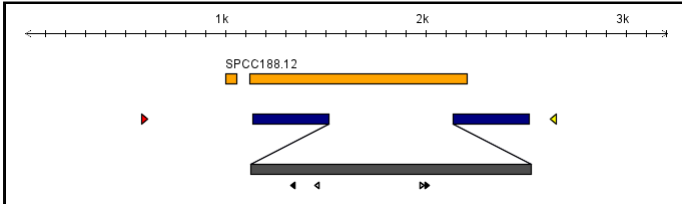

SPCC1884.02

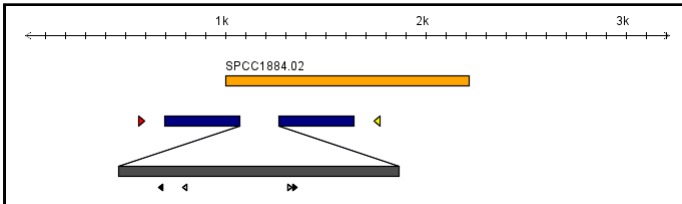

SPCC18B5.01c

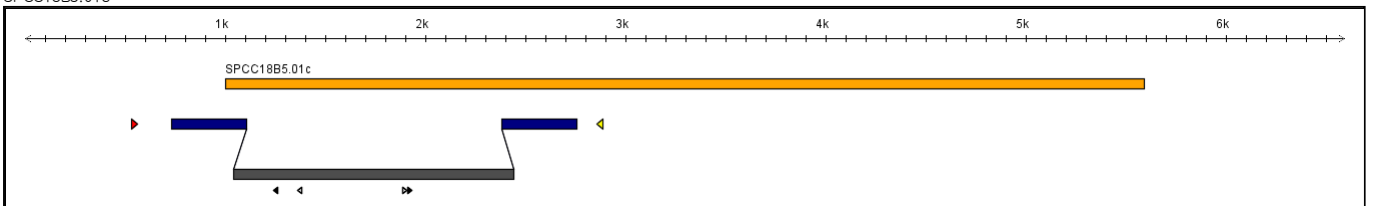

SPCC18B5.04

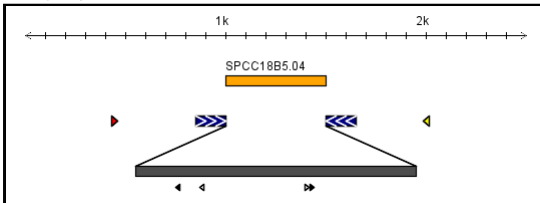

SPCC18B5.05c

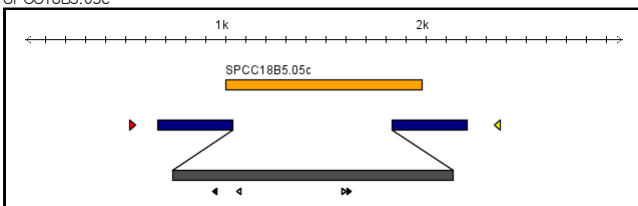

SPCC18B5.06

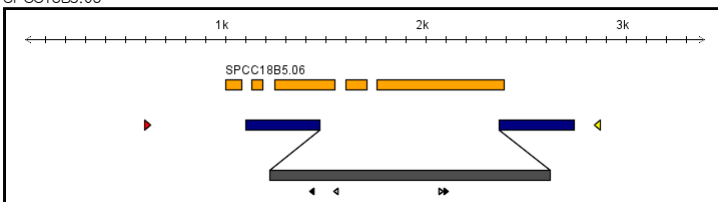

SPCC18B5.07c

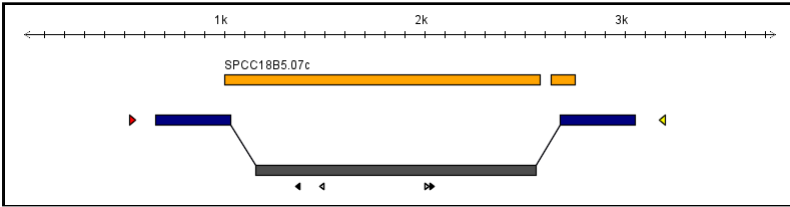

SPCC18B5.08c

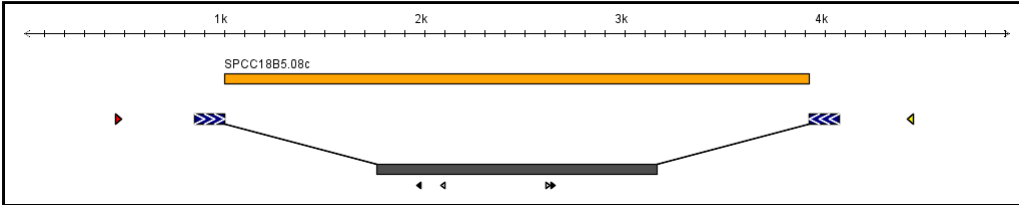

SPCC18B5.10c

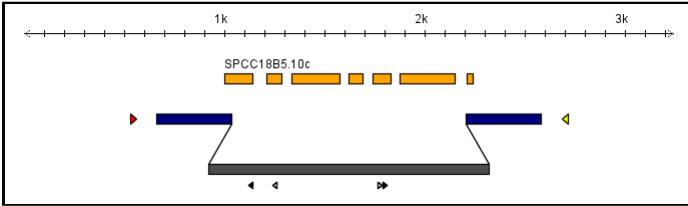

SPCC18B5.11c

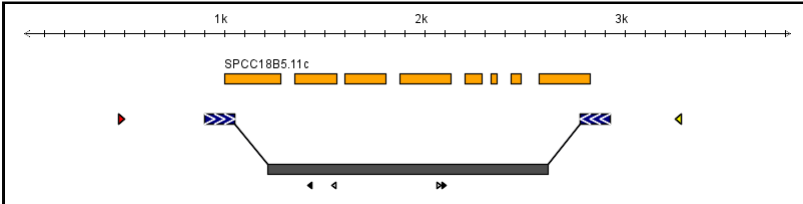

SPCC1902.02

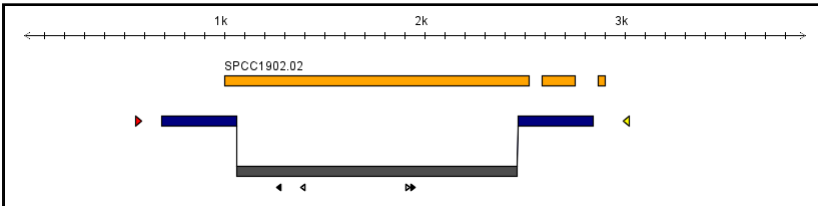

SPCC1906.01

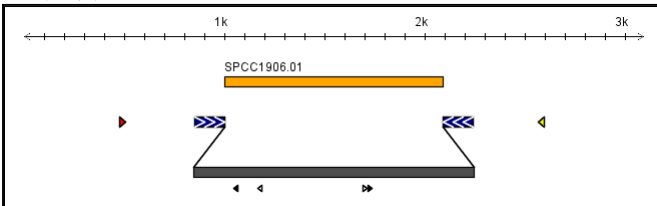

SPCC1906.02c

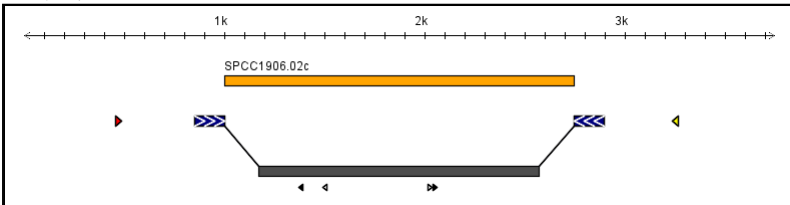

SPCC1906.03

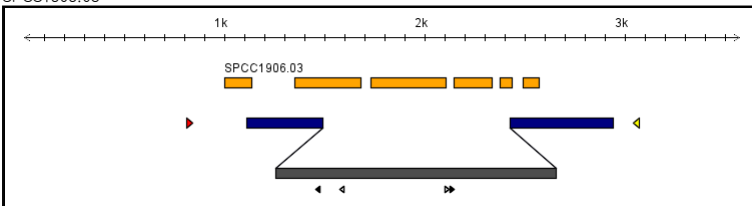

SPCC1906.04

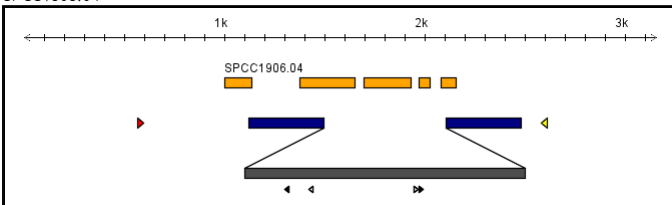

SPCC191.01

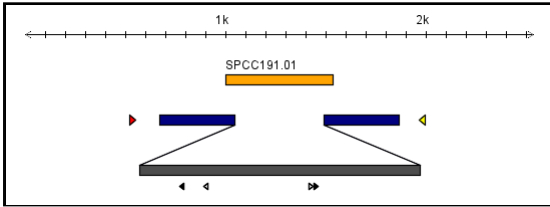

SPCC191.02c

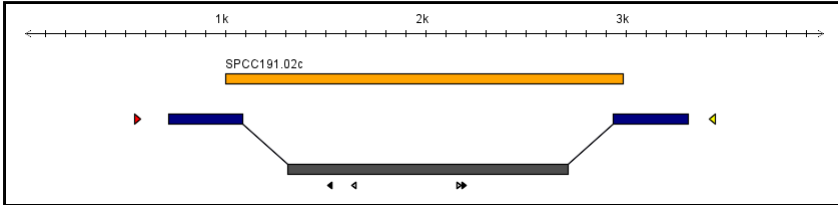

SPCC191.03c

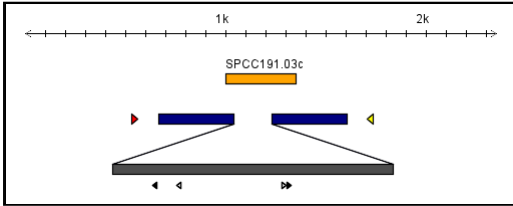

SPCC191.05c

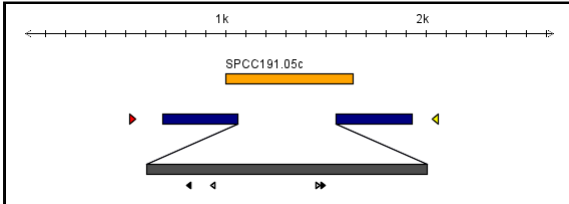

SPCC191.06

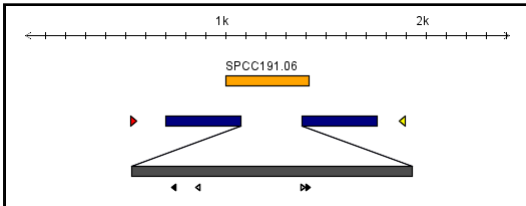

SPCC191.07

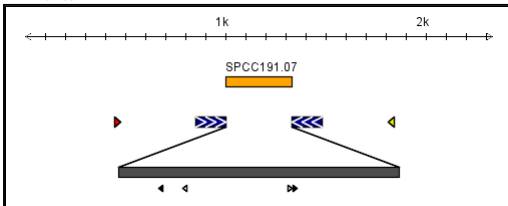

SPCC191.08

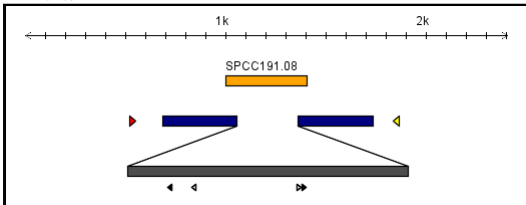

SPCC191.09c

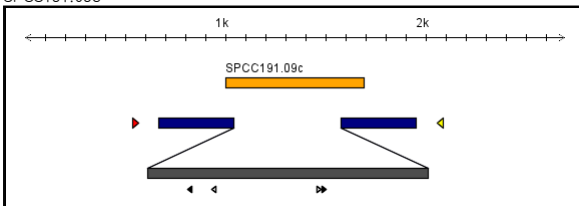

SPCC191.10

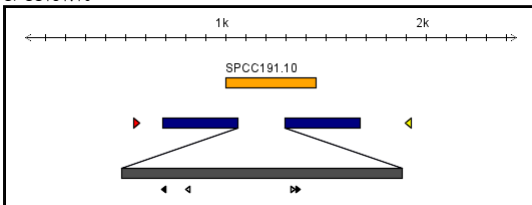

SPCC191.11

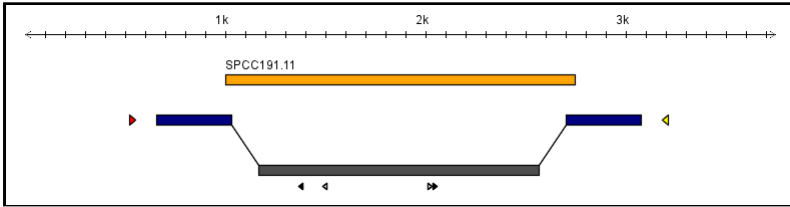

SPCC1919.01

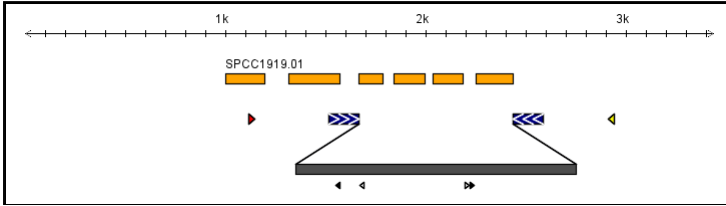

SPCC1919.02

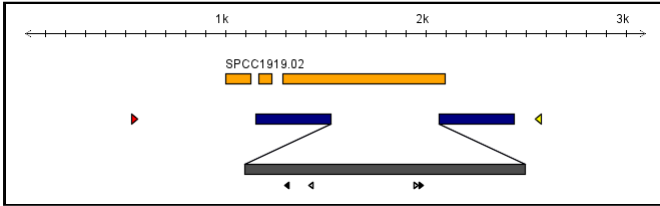

SPCC1919.03c

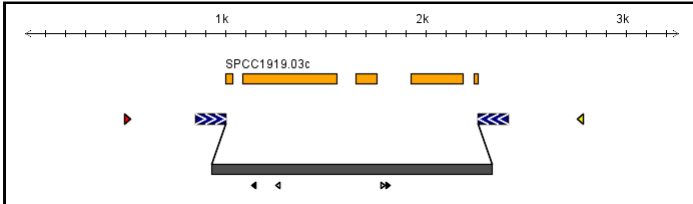

SPCC1919.07

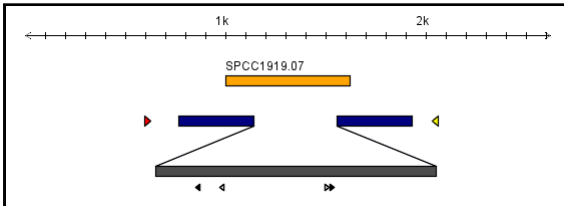

SPCC1919.08c

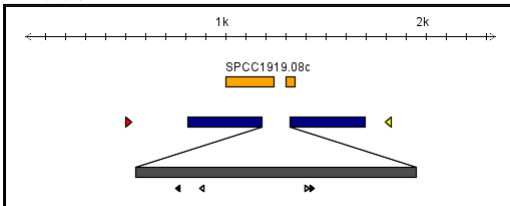

SPCC1919.09

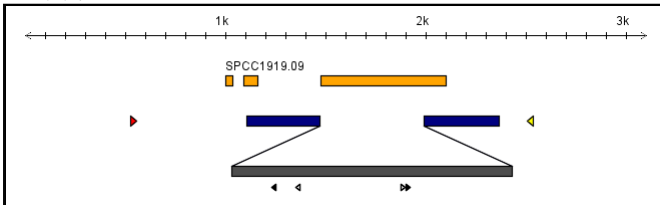

SPCC1919.11

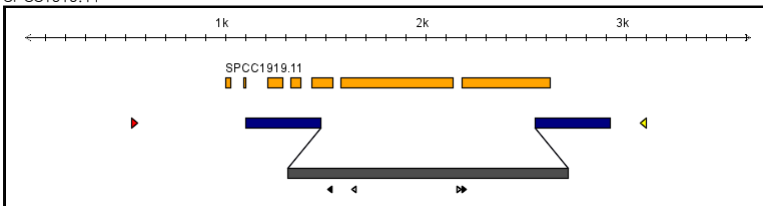

SPCC1919.12c

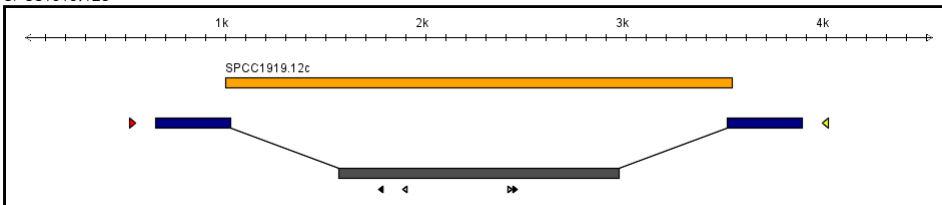

SPCC1919.13c

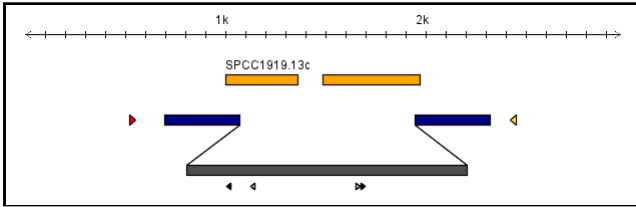

SPCC1919.14c

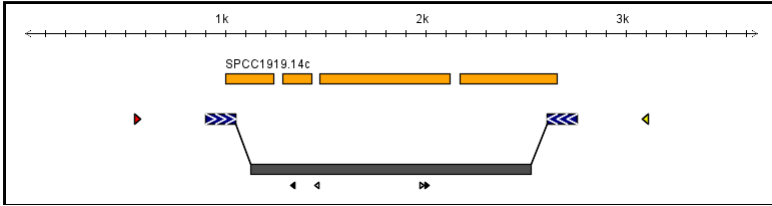

SPCC1919.15

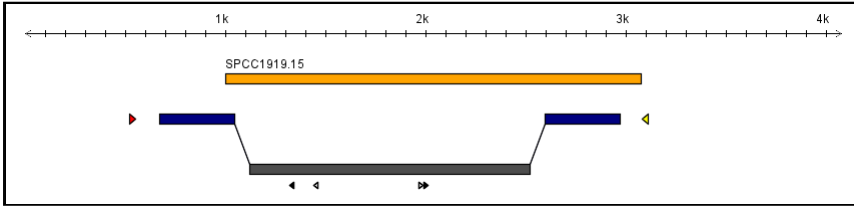

SPCC23B6.01c

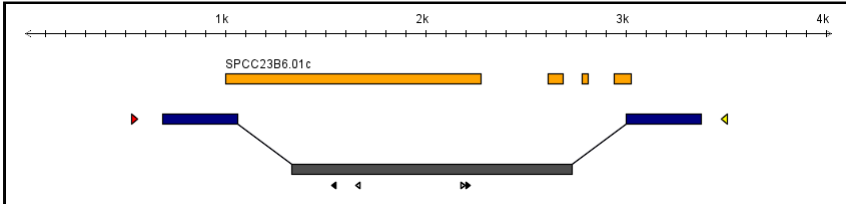

SPCC23B6.02c

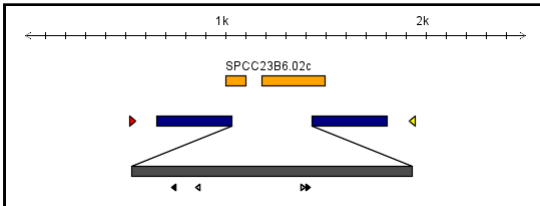

SPCC23B6.05c

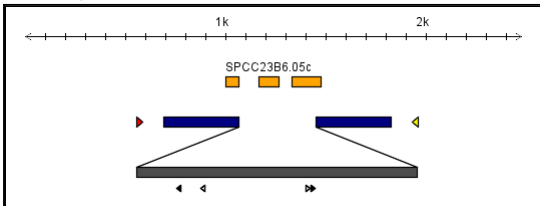

SPCC24B10.02c

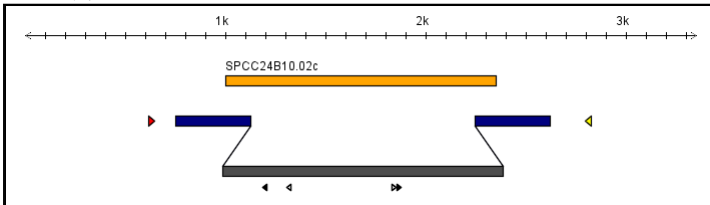

SPCC24B10.03

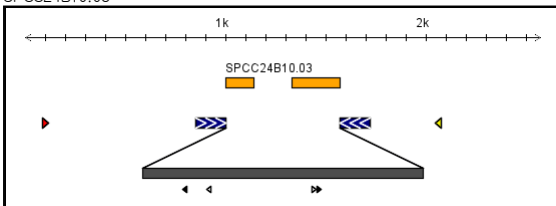

SPCC24B10.04

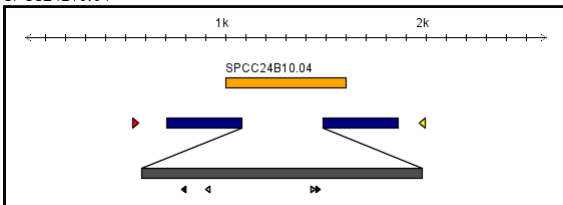

SPCC24B10.07

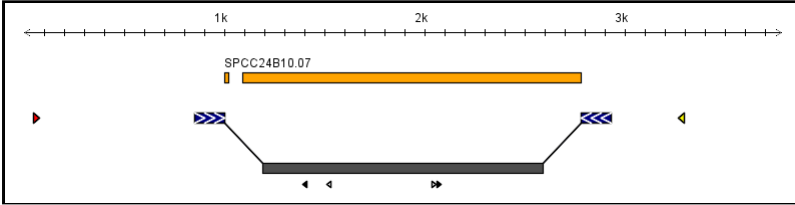

SPCC24B10.08c

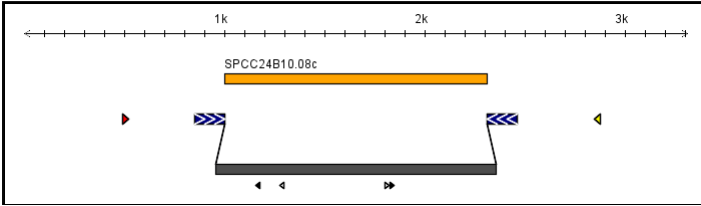

SPCC24B10.09

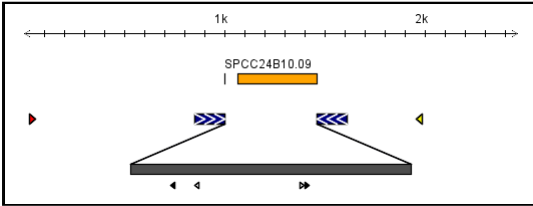

SPCC24B10.10c

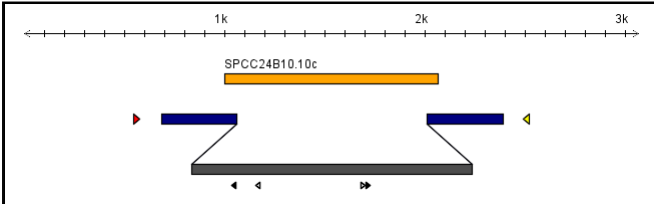

SPCC24B10.11c

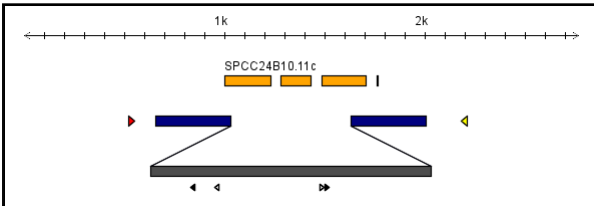

SPCC24B10.12

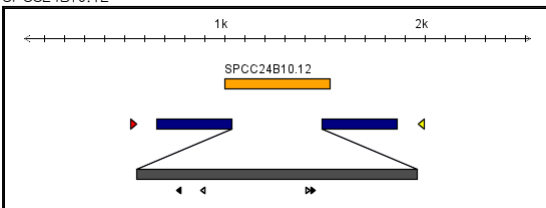

SPCC24B10.13

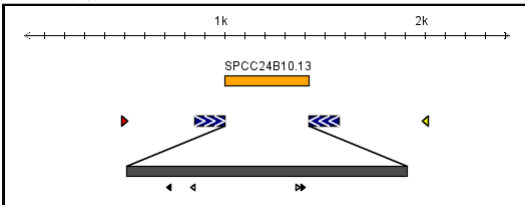

SPCC24B10.14c

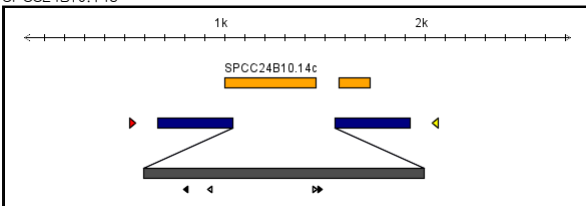

SPCC24B10.15

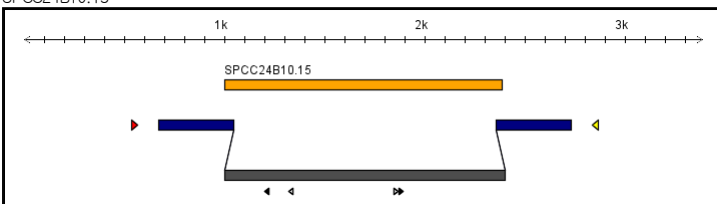

SPCC24B10.16c

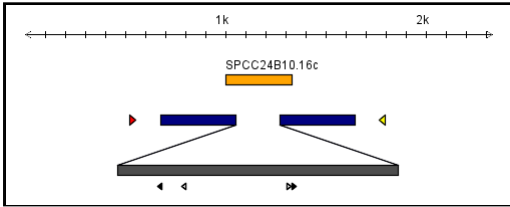

SPCC24B10.17

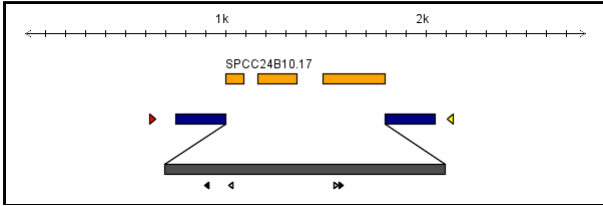

SPCC24B10.18

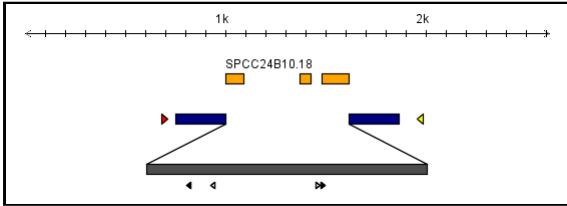

SPCC24B10.19c

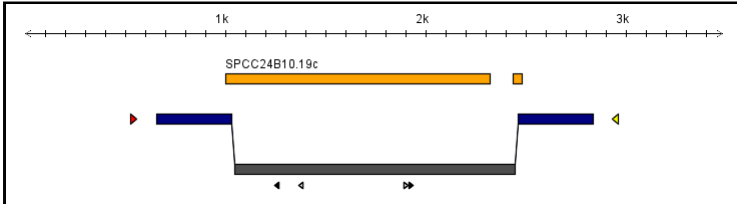

SPCC24B10.20

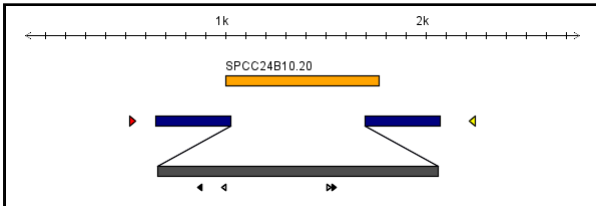

SPCC24B10.21

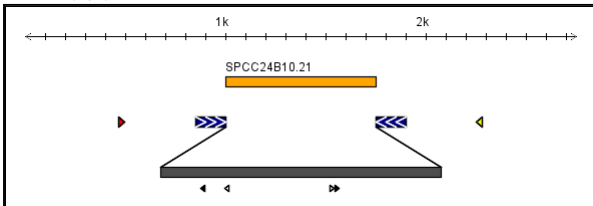

SPCC24B10.22

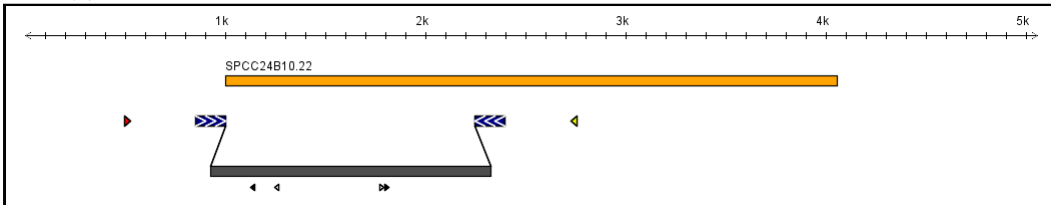

SPCC285.03

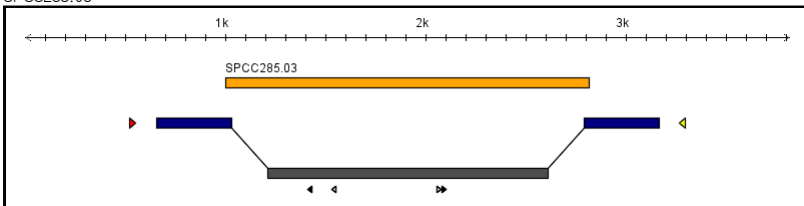

SPCC285.04

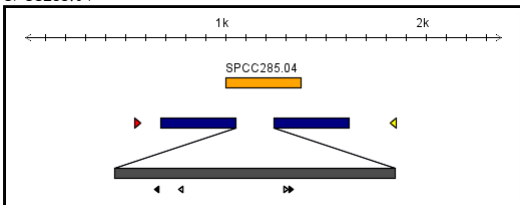

SPCC285.05

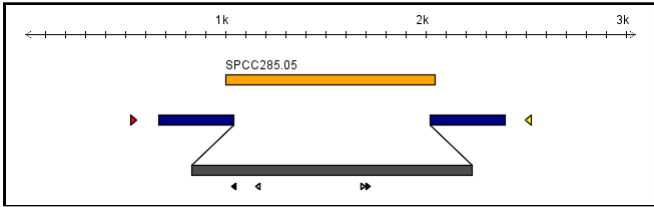

SPCC285.08

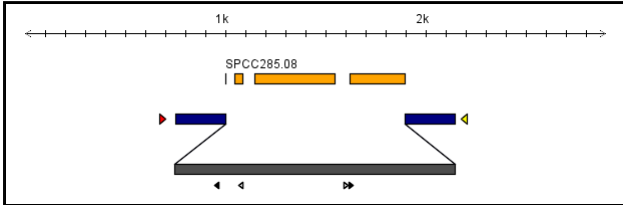

SPCC285.09c

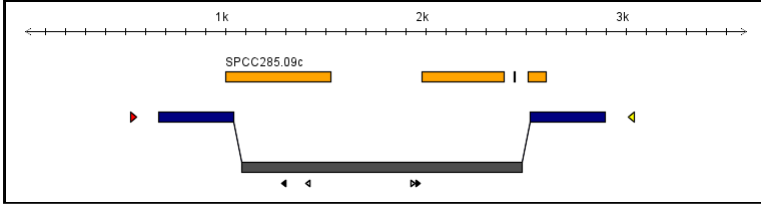

SPCC285.10c

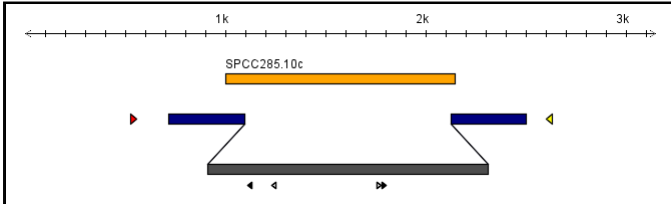

SPCC285.11

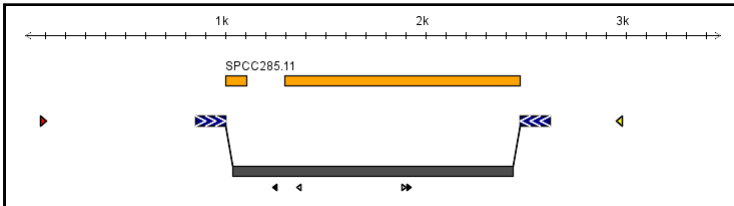

SPCC285.12

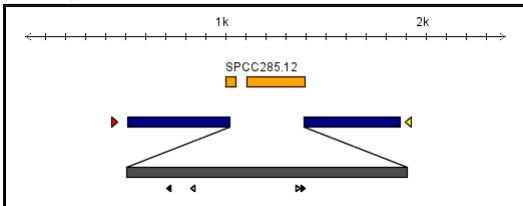

SPCC285.13c

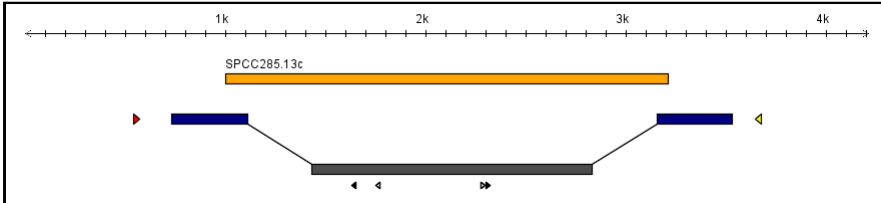

SPCC285.15c

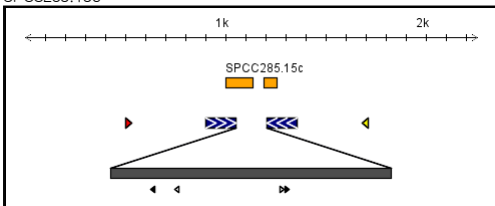

SPCC285.17

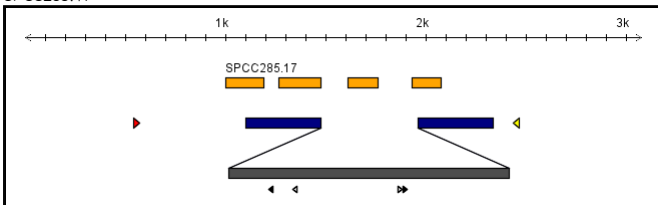



SPCC290.02

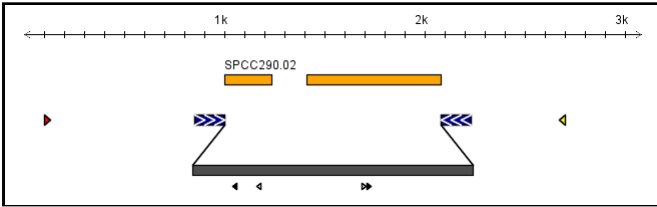

SPCC297.03

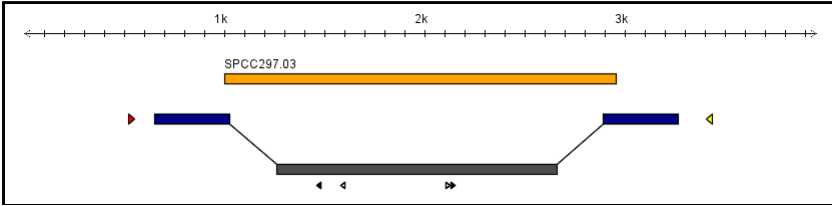

SPCC297.04c

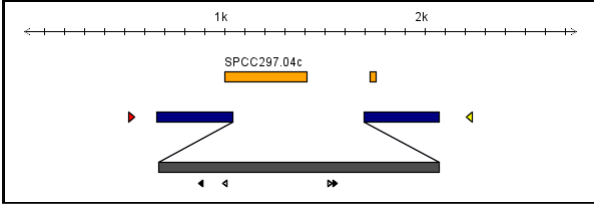

SPCC297.05

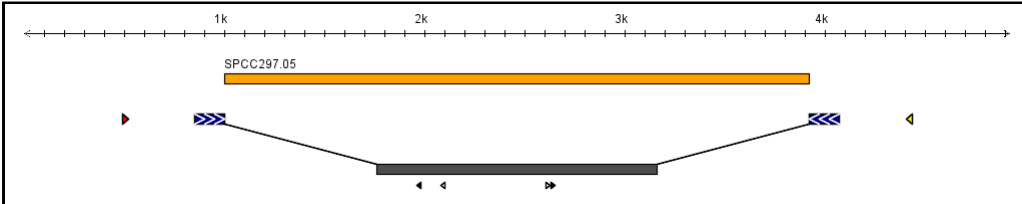

SPCC297.06c

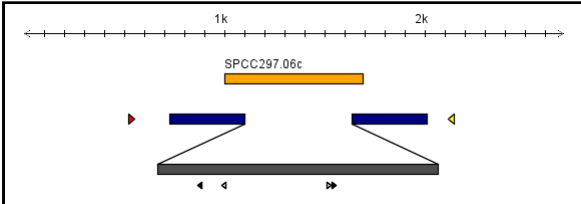

SPCC306.02c

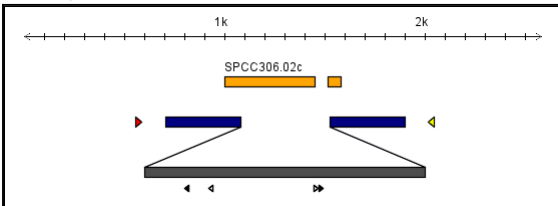

SPCC306.03c

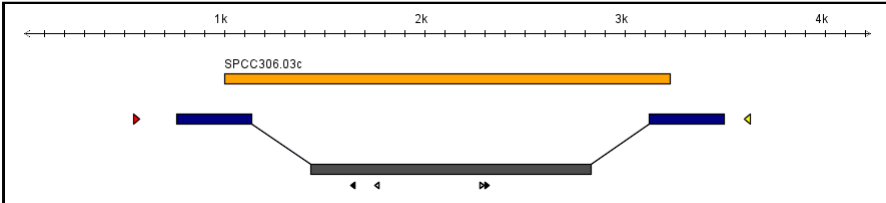

SPCC306.05c

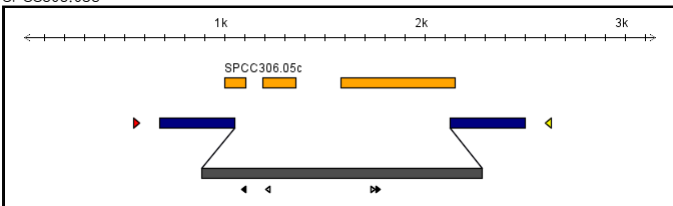

SPCC306.06c

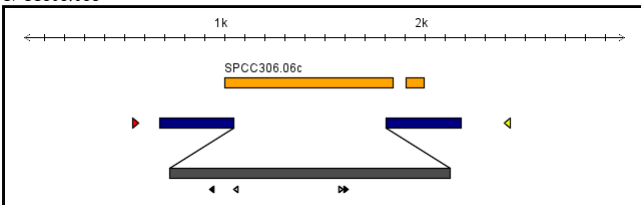

SPCC306.07c

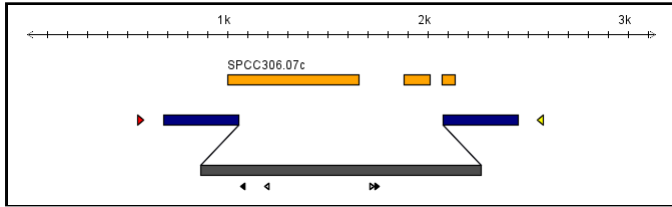

SPCC306.08c

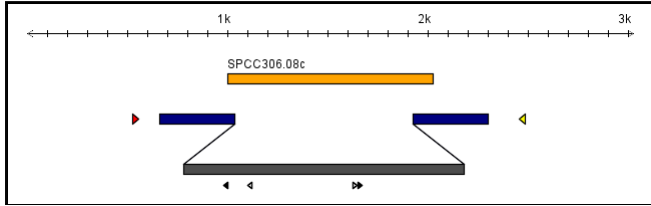

SPCC306.09c

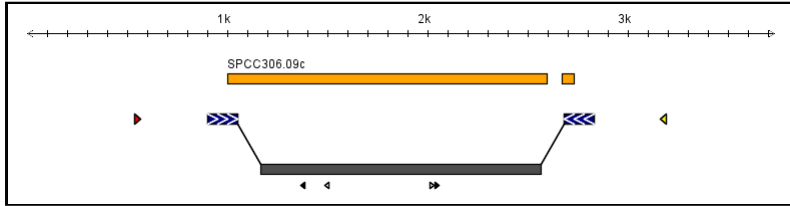

SPCC306.11

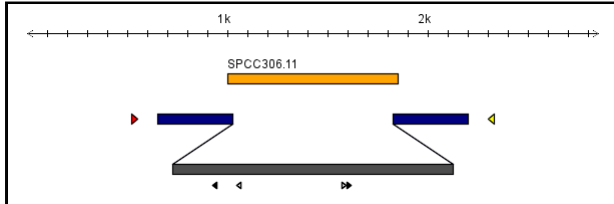

SPCC31H12.02c

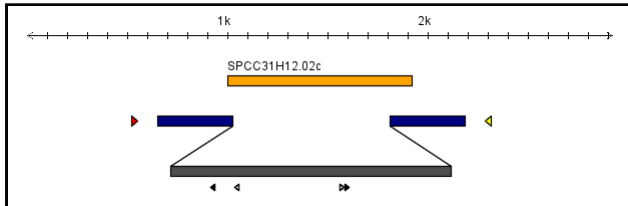

SPCC31H12.03c

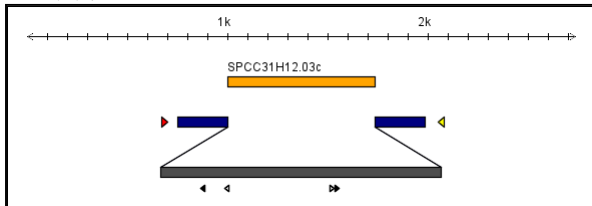

SPCC31H12.04c

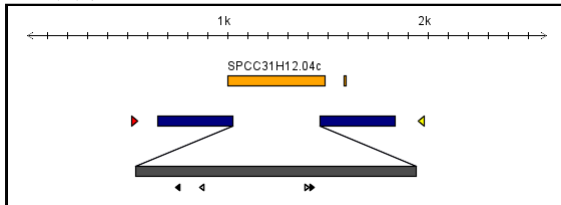

SPCC31H12.05c

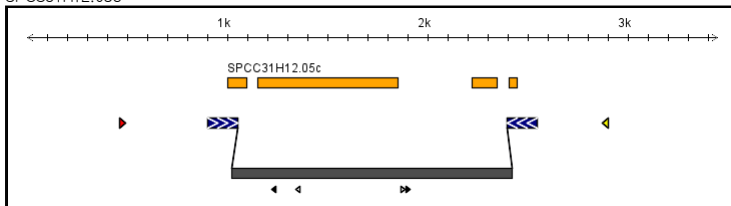

SPCC31H12.06

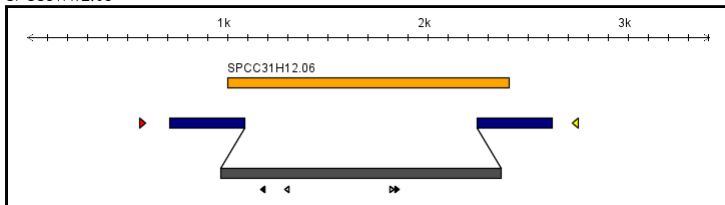

SPCC31H12.07

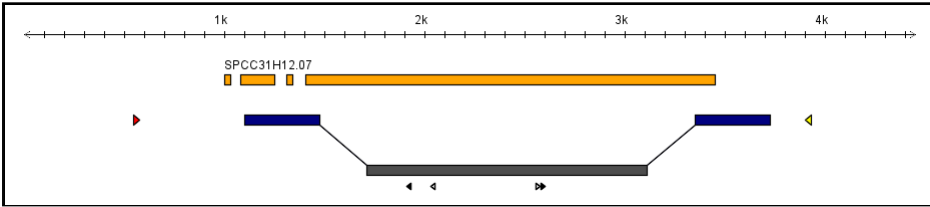

SPCC31H12.08c

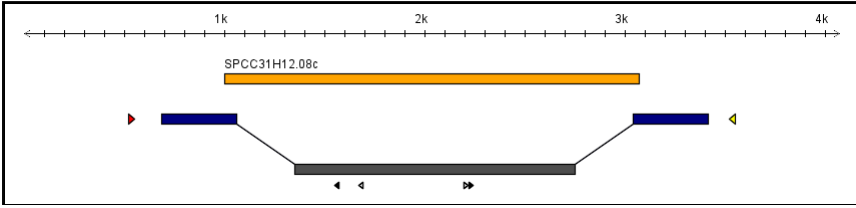

SPCC320.03

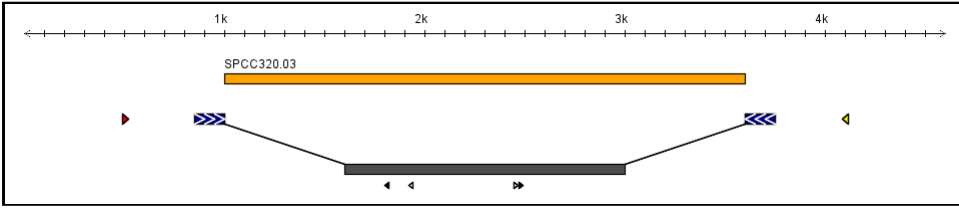

SPCC320.05

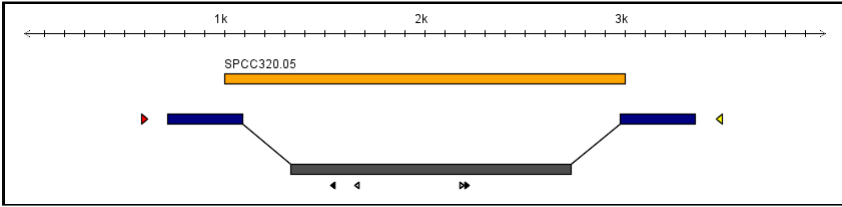

SPCC320.06

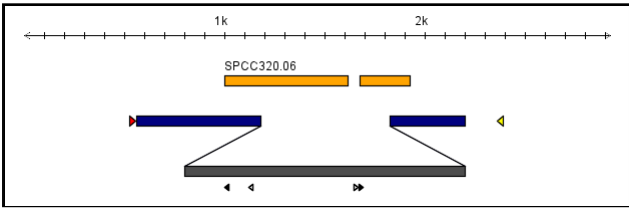

SPCC320.08

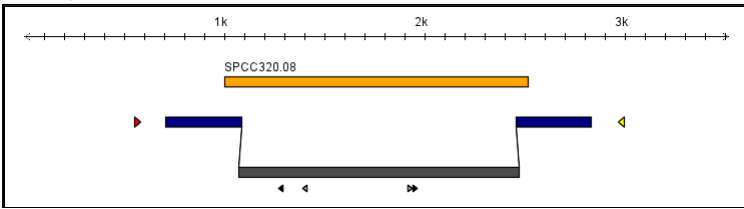

SPCC320.09

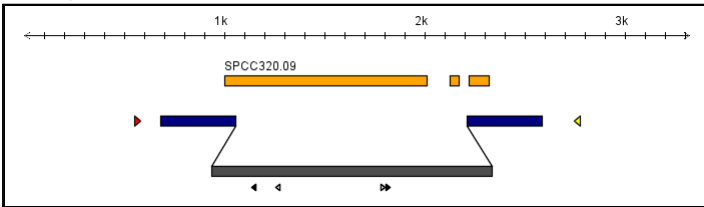

SPCC320.10

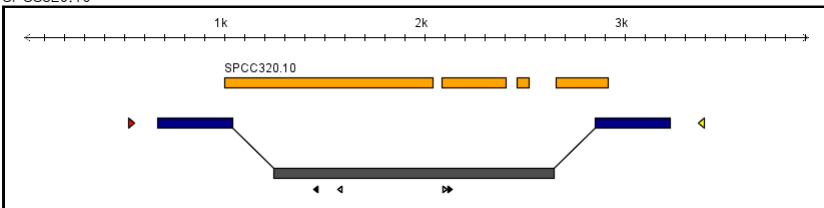

SPCC320.11c

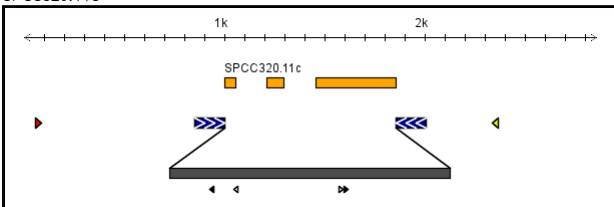

SPCC320.12

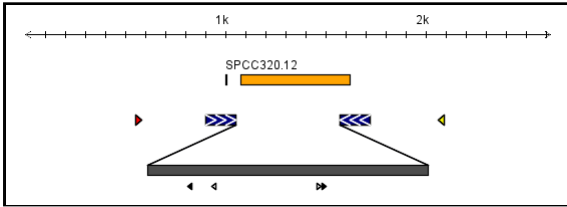

SPCC320.13c

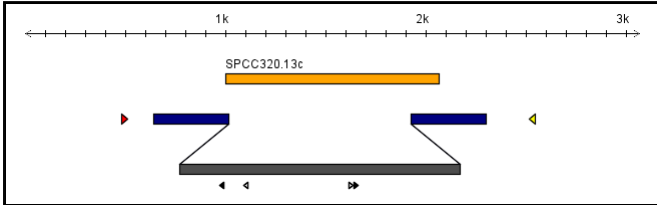

SPCC320.14

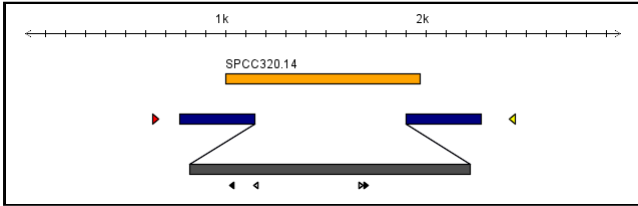

SPCC330.02

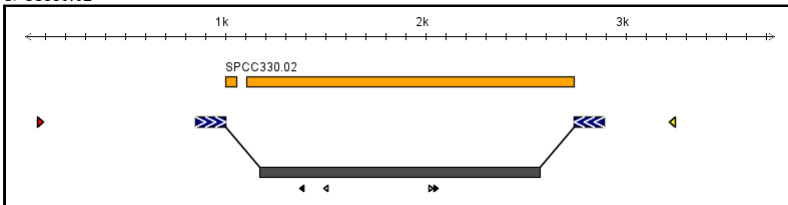

SPCC330.03c

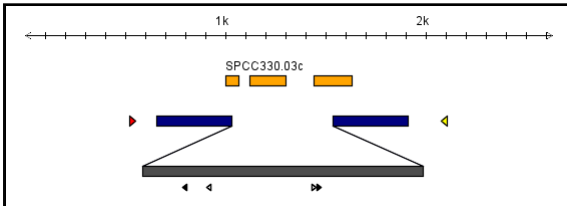

SPCC330.04c

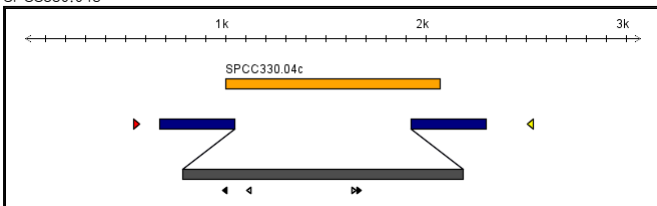

SPCC330.06c

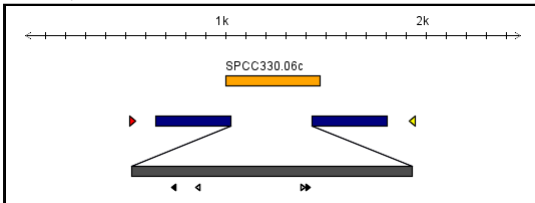

SPCC330.07c

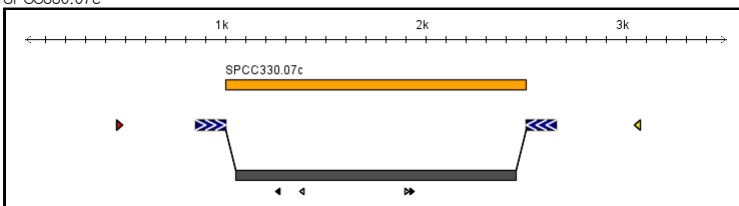

SPCC330.08

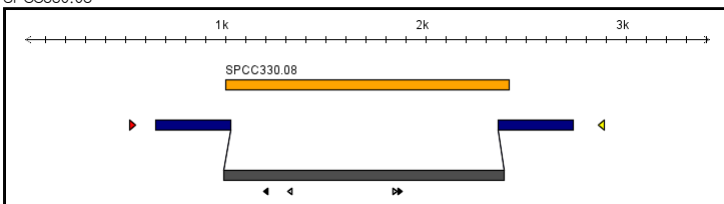

SPCC330.09

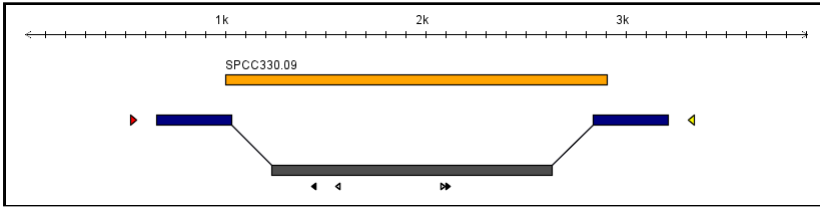

SPCC330.10

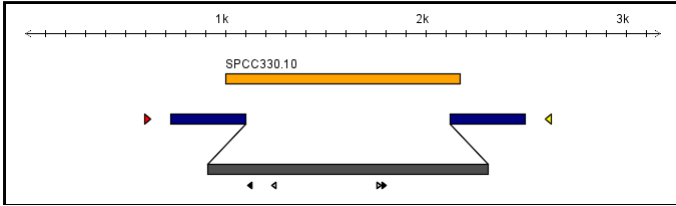

SPCC330.12c

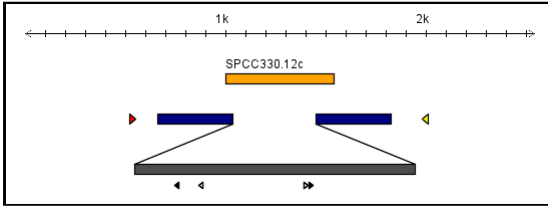

SPCC330.13

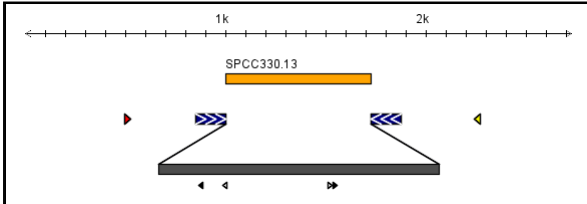

SPCC330.14c

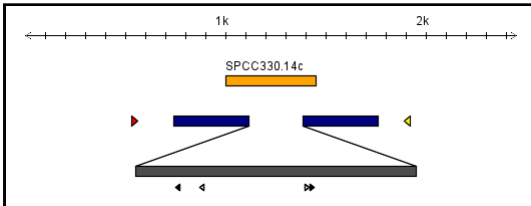

SPCC330.19c

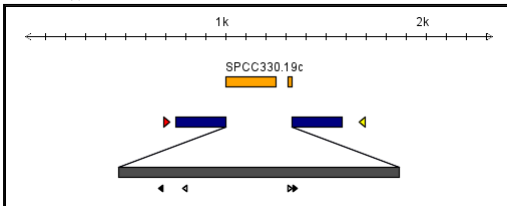

SPCC338.02

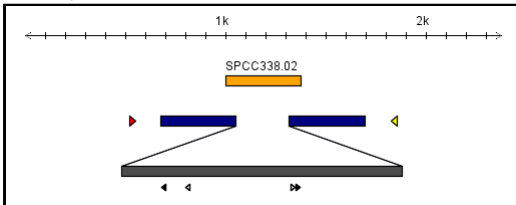

SPCC338.04

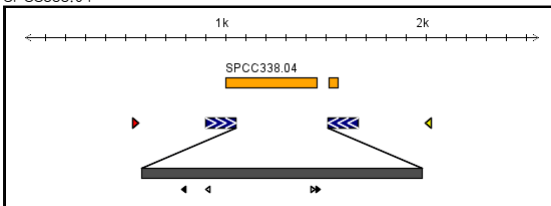

SPCC338.05c

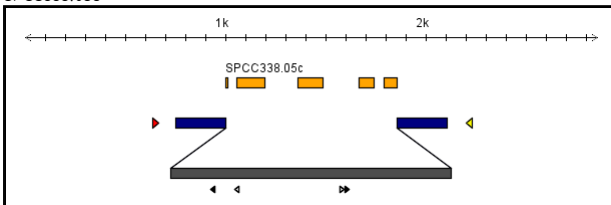

SPCC338.06c

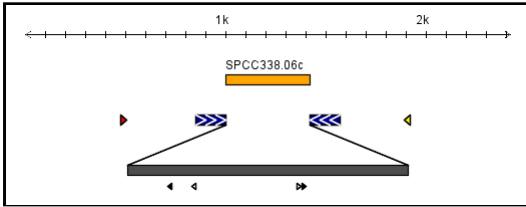

SPCC338.07c

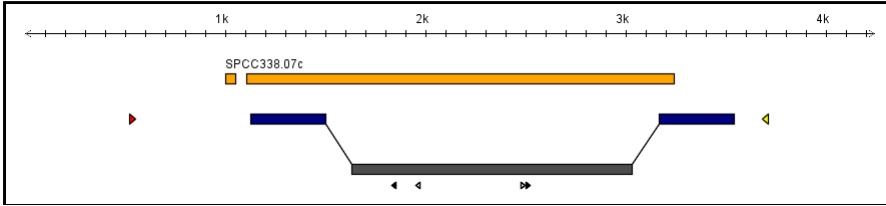

SPCC338.08

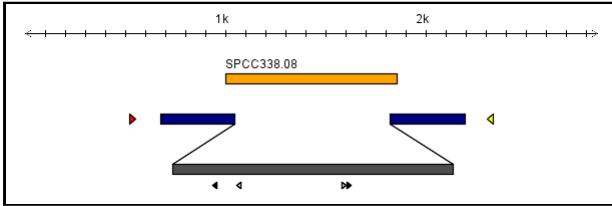

SPCC338.10c

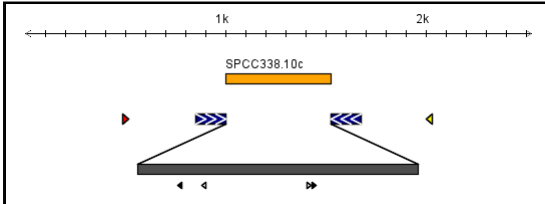

SPCC338.11c

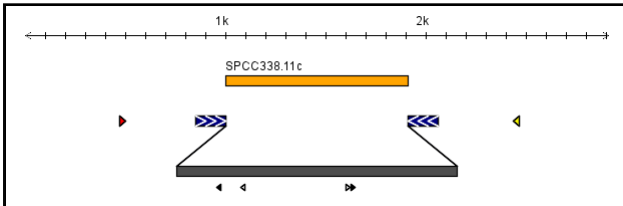

SPCC338.12

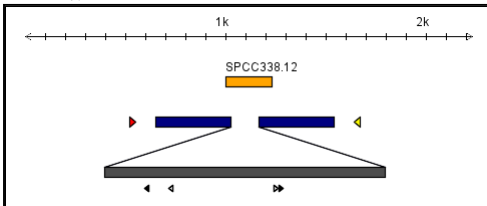

SPCC338.13

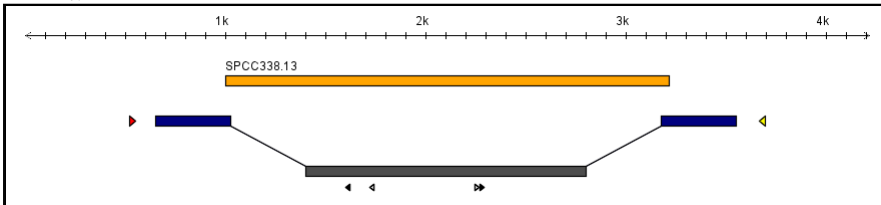

SPCC338.14

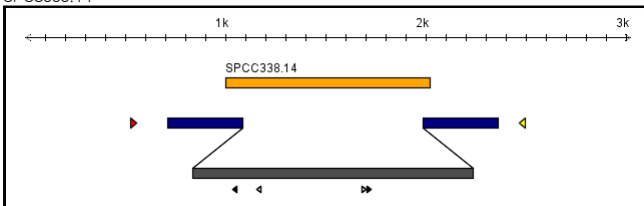

SPCC338.15

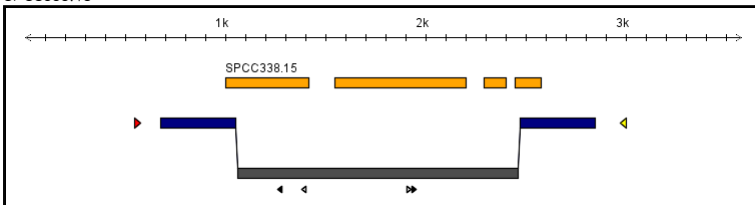

SPCC338.16

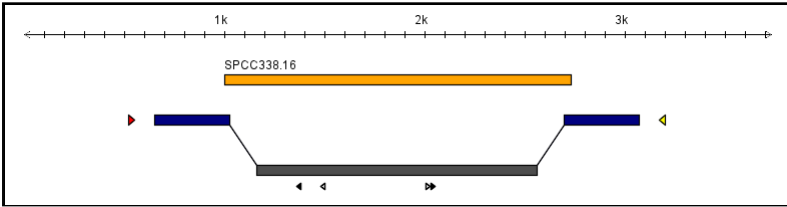

SPCC338.18

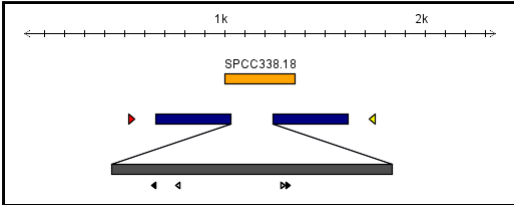

SPCC364.01

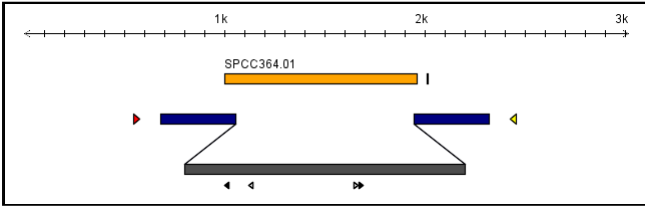

SPCC364.02c

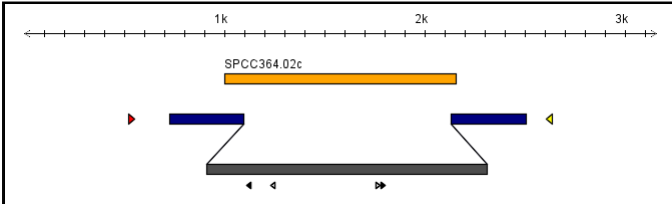

SPCC364.03

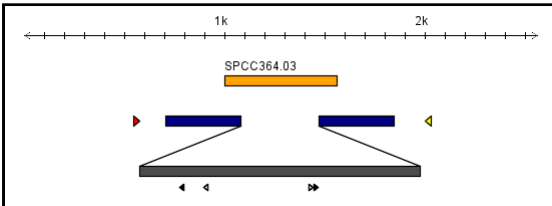

SPCC364.04c

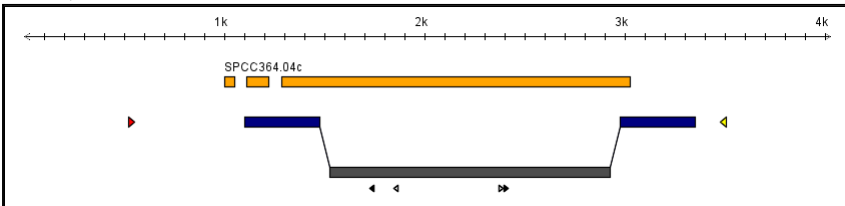

SPCC364.05

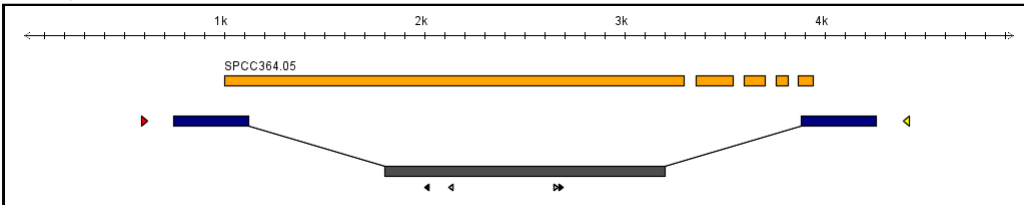

SPCC364.06

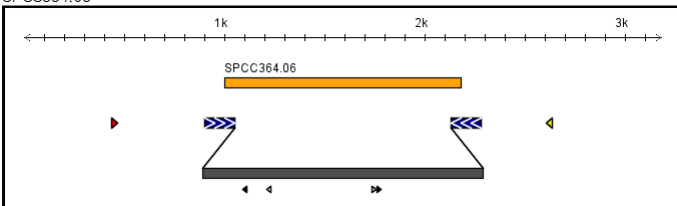

SPCC417.02

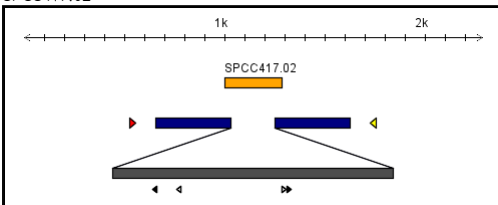

SPCC417.05c

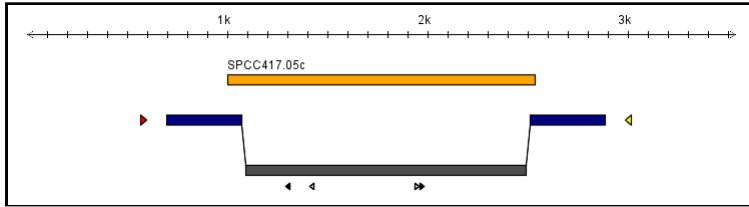

SPCC417.10

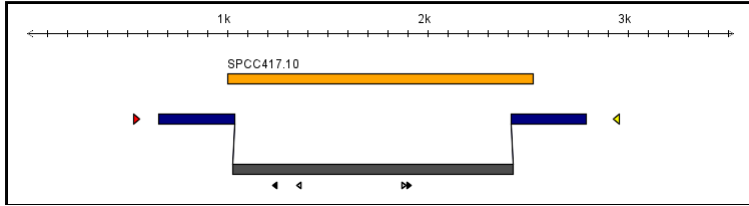

SPCC417.11c

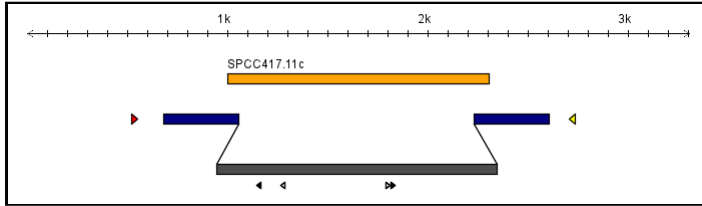

SPCC417.12

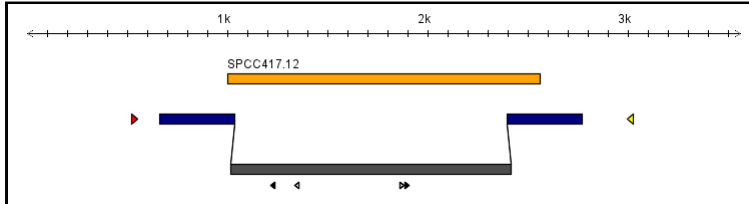

SPCC4B3.18

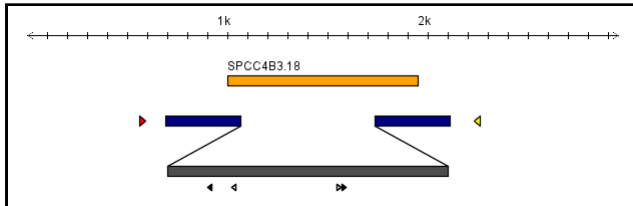

SPCC4E9.02

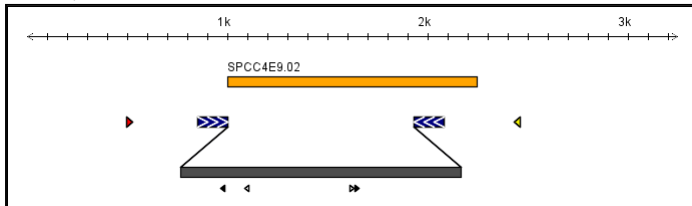

SPCC4F11.02

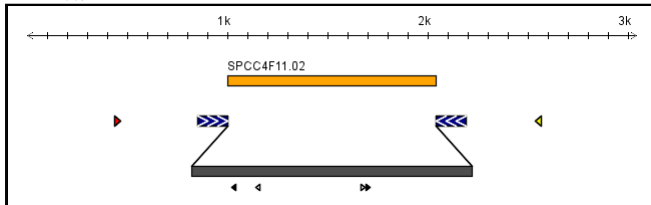

SPCC4F11.03c

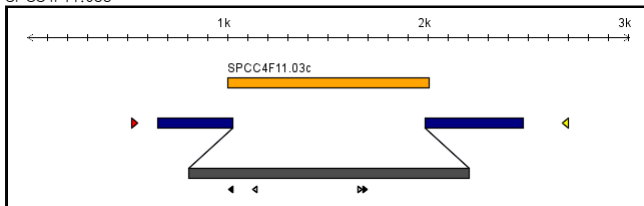

SPCC4F11.04c

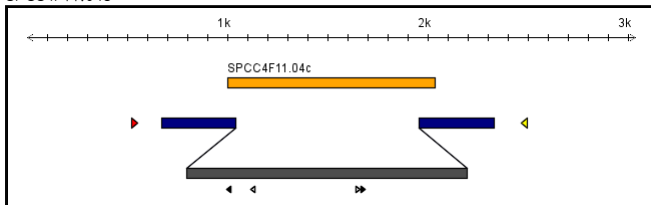



SPCC4G3.02

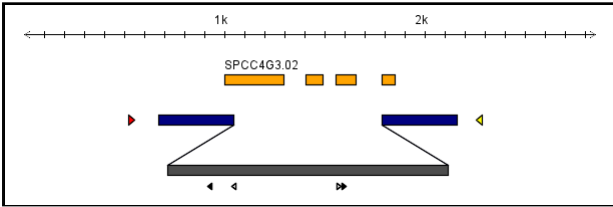

SPCC4G3.03

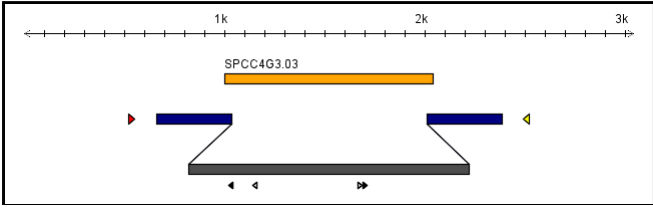

SPCC4G3.04c

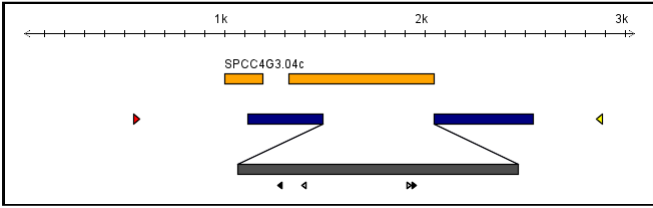

SPCC4G3.05c

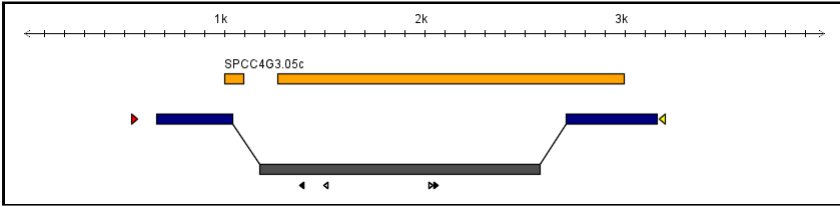

SPCC4G3.06c

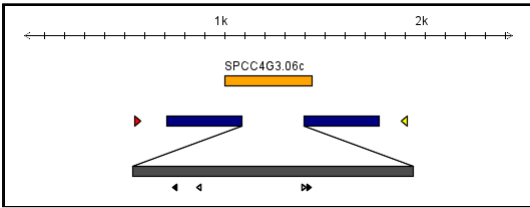

SPCC4G3.07c

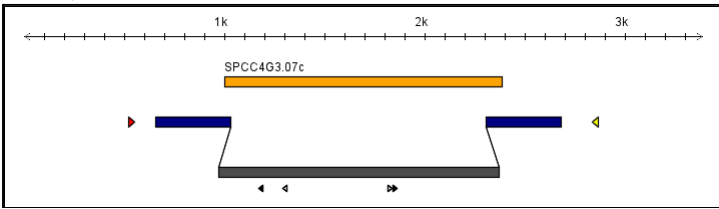

SPCC4G3.08

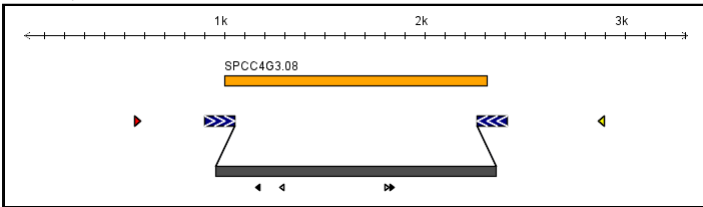

SPCC4G3.09c

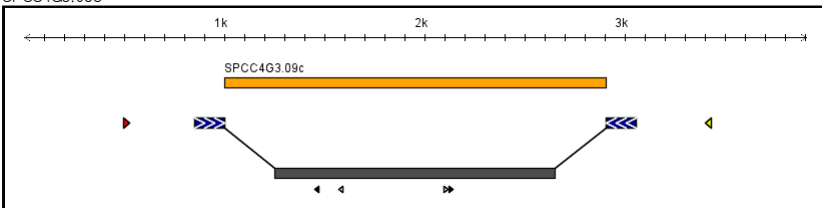

SPCC4G3.10c

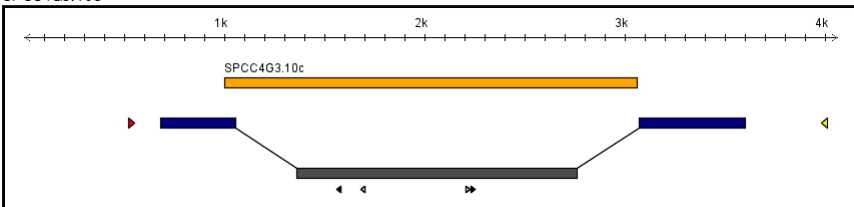

SPCC4G3.11

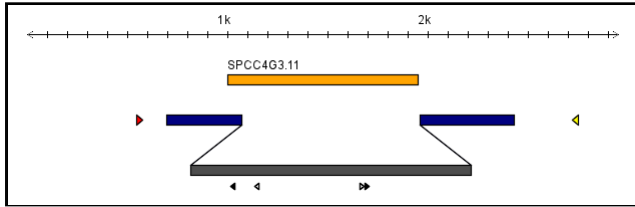

SPCC4G3.13c

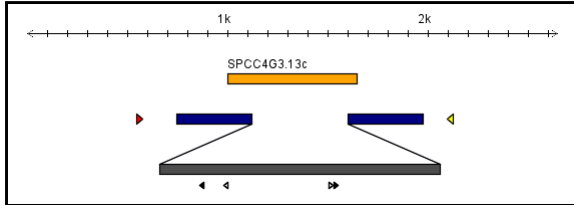

SPCC4G3.14

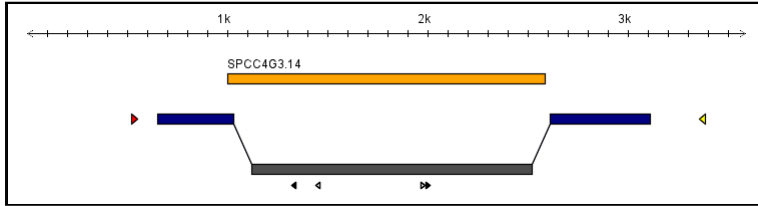

SPCC4G3.15c

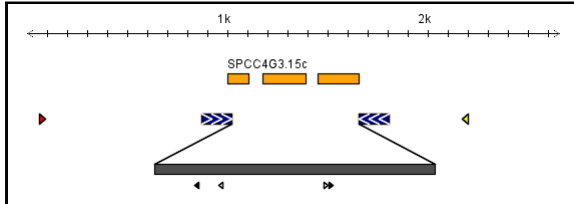

SPCC4G3.16

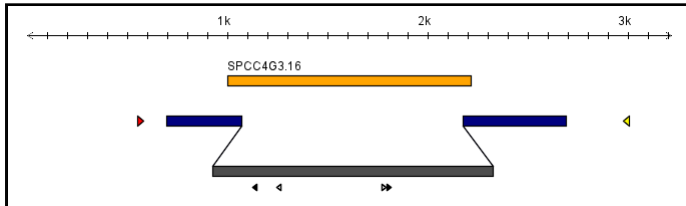

SPCC4G3.17

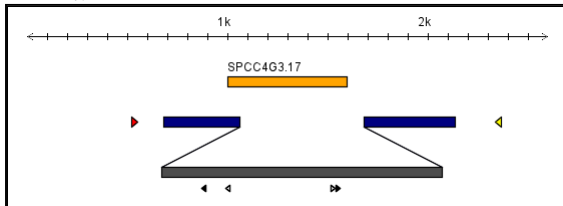

SPCC4G3.19

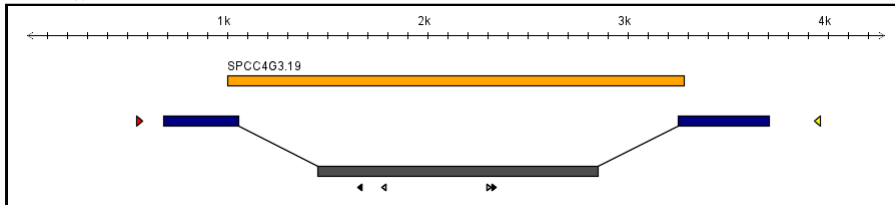

SPCC548.05c

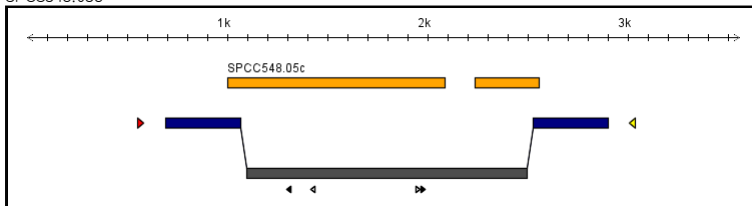

SPCC548.06c

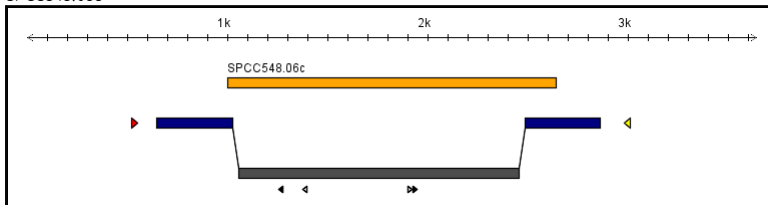

SPCC548.07c

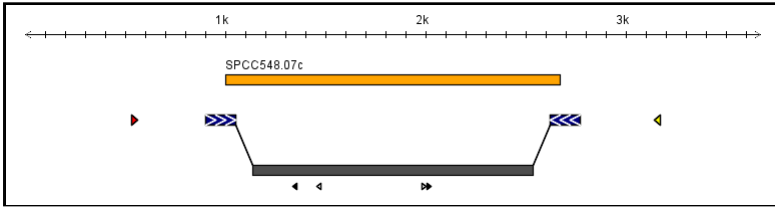

SPCC550.01c

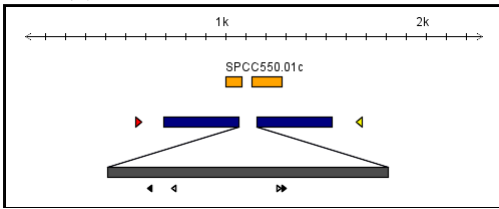

SPCC550.02c

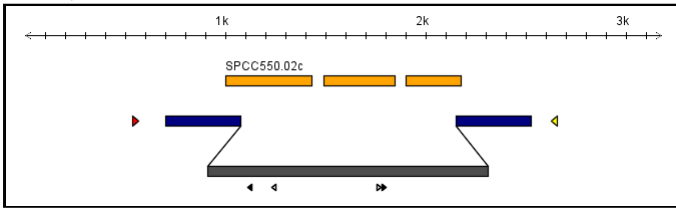

SPCC550.04c

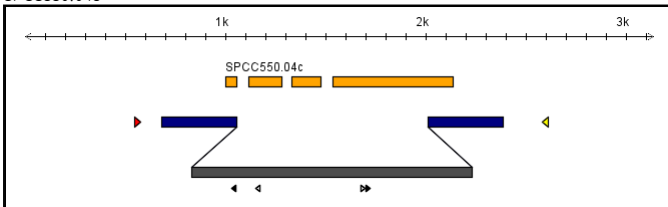

SPCC550.05

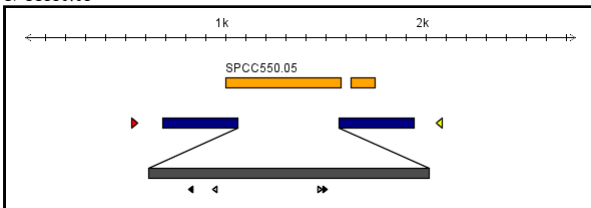

SPCC550.07

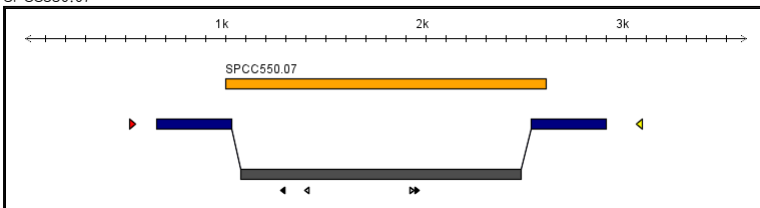

SPCC550.08

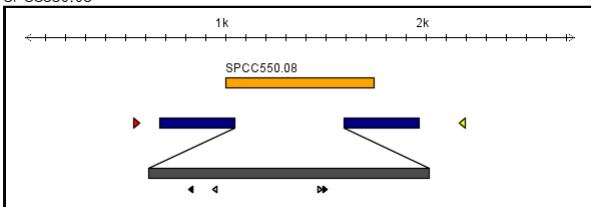

SPCC550.09

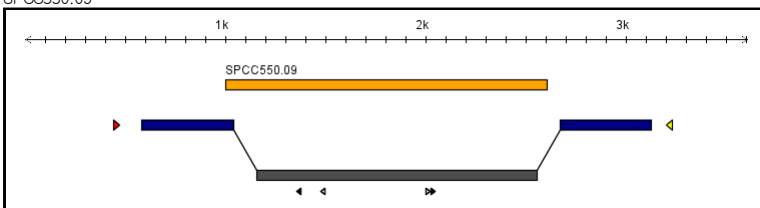

SPCC550.10

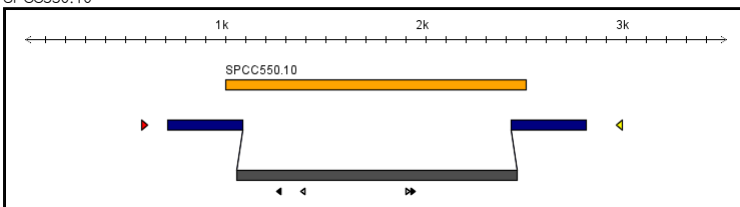

SPCC550.12

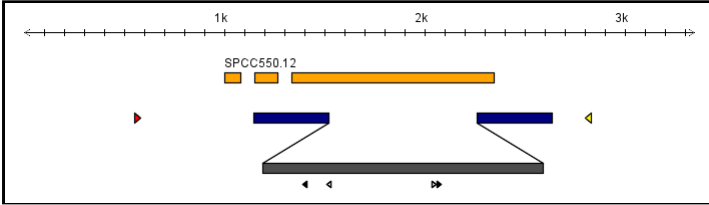

SPCC550.13

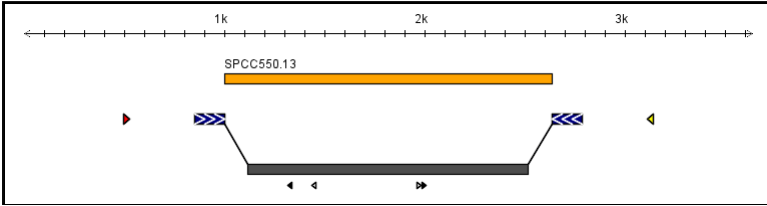

SPCC550.15c

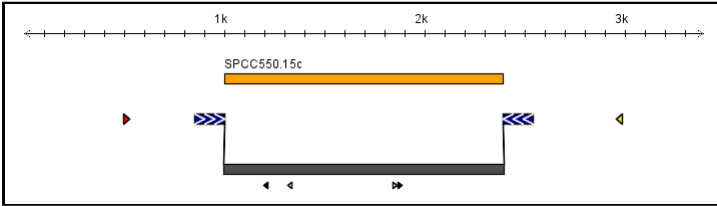

SPCC553.01c

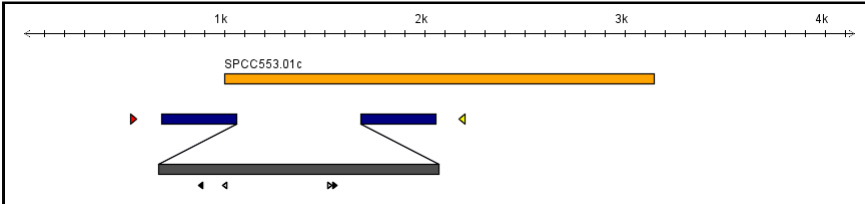

SPCC553.02

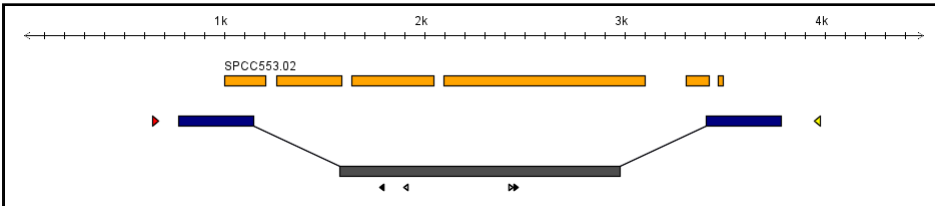

SPCC553.04

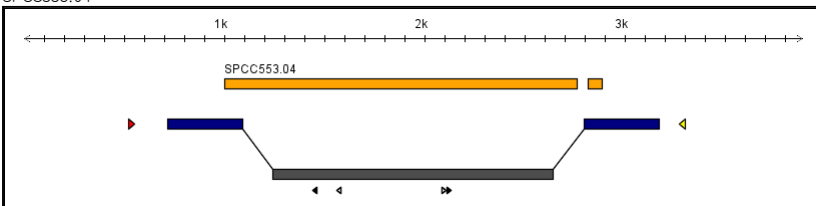

SPCC553.06

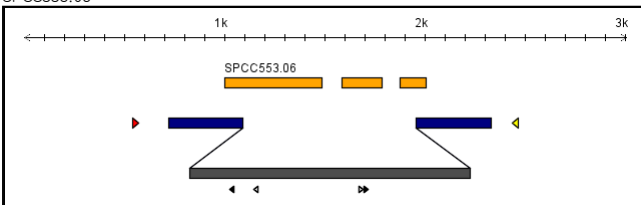

SPCC553.07c

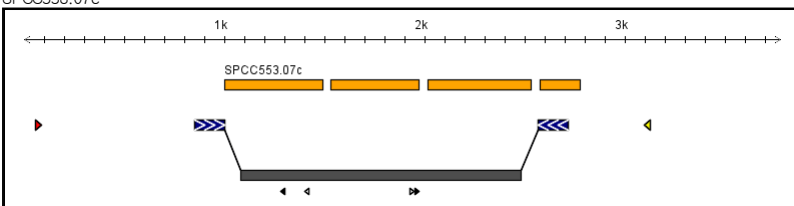

SPCC553.08c

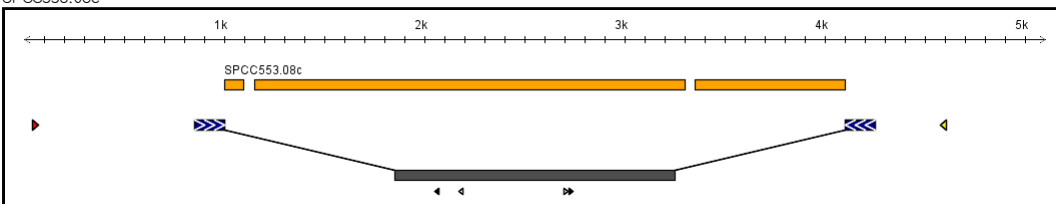

SPCC553.11c

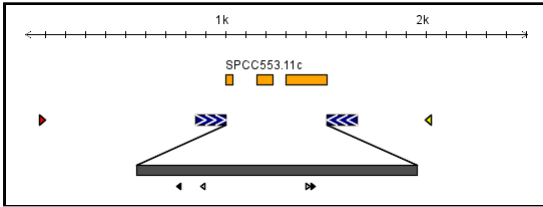

SPCC553.12c

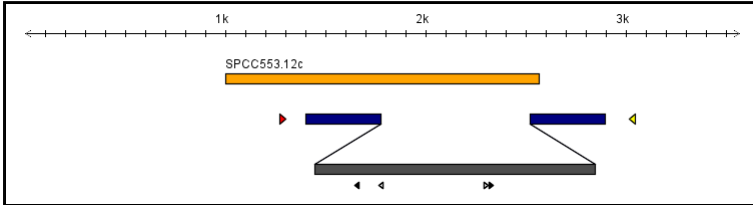

SPCC569.01c

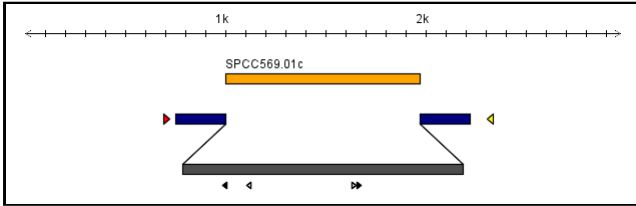

SPCC569.02c

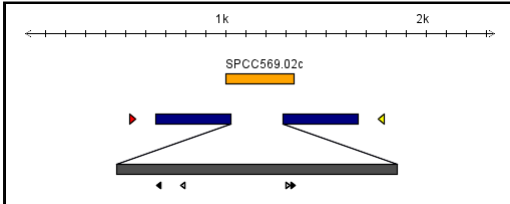

SPCC569.03

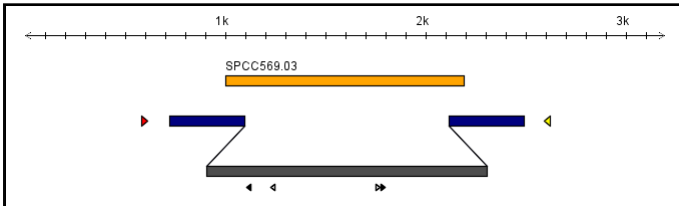

SPCC569.05c

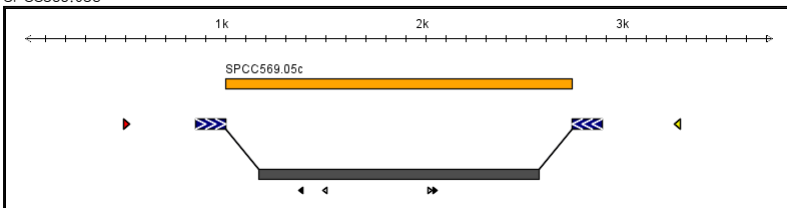

SPCC569.06

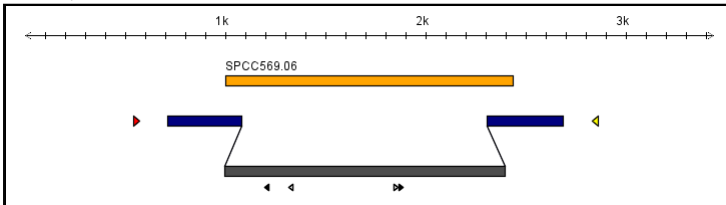

SPCC569.07

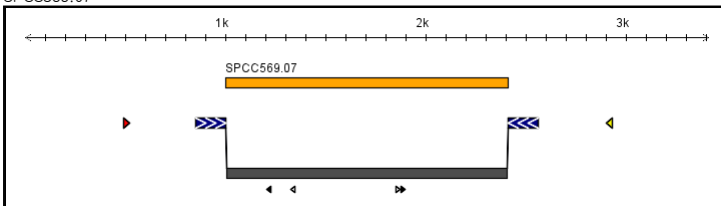

SPCC569.08c

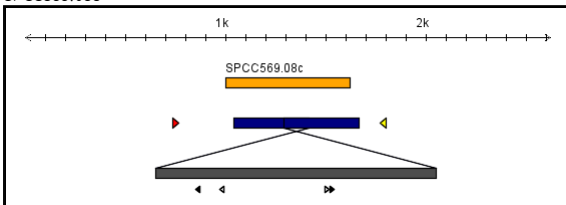

SPCC576.01c

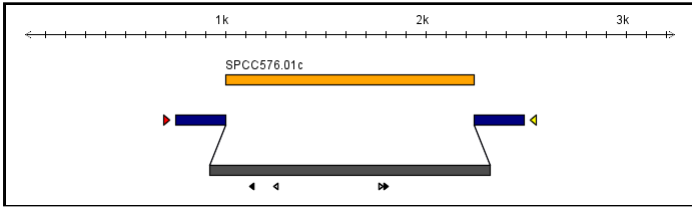

SPCC576.02

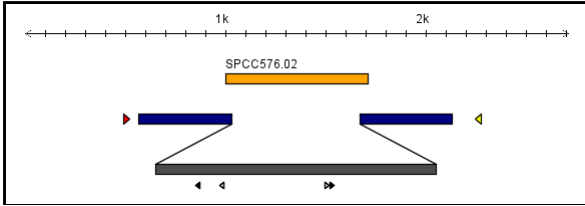

SPCC576.03c

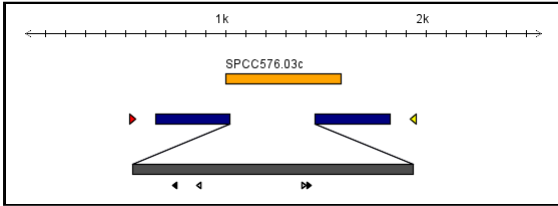

SPCC576.04

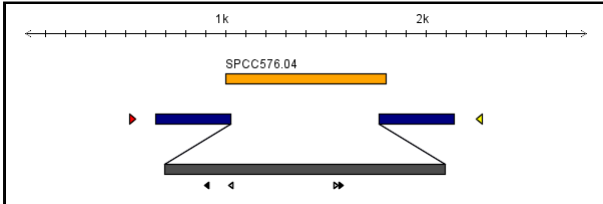

SPCC576.06c

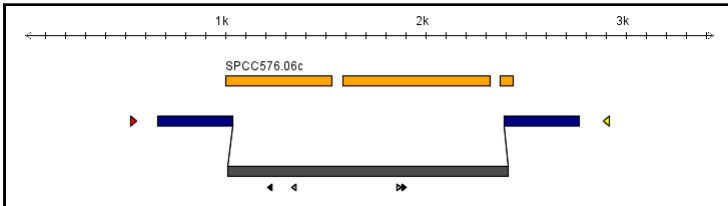

SPCC576.07

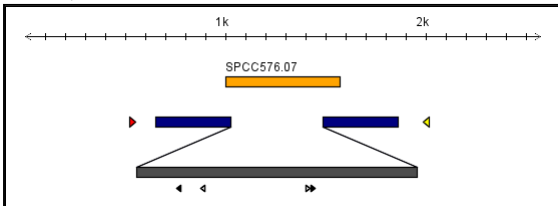

SPCC576.08c

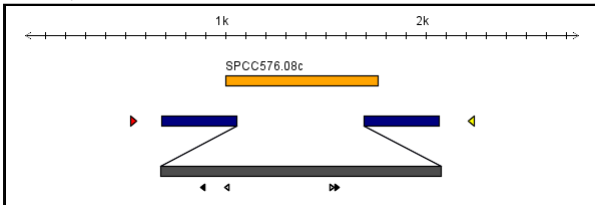

SPCC576.10c

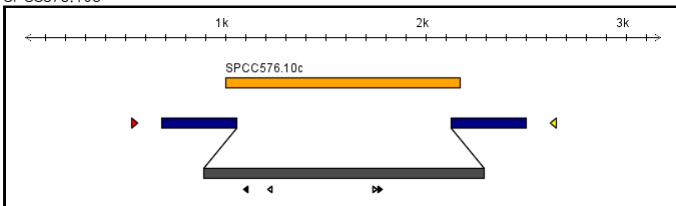

SPCC576.11

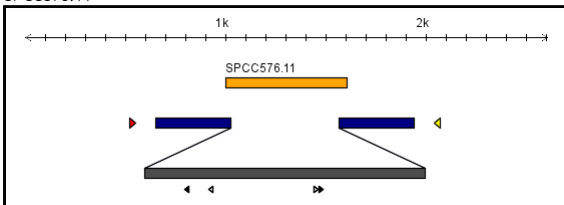

SPCC576.12c

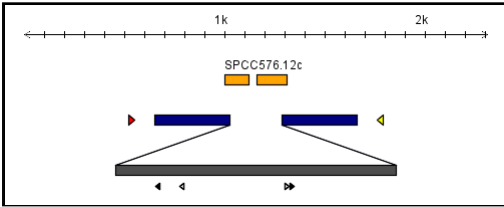

SPCC576.13

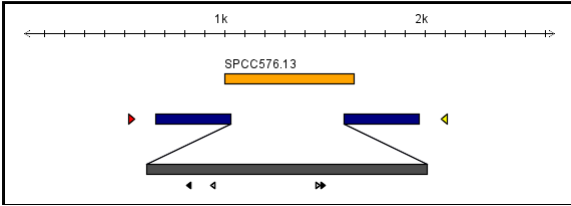

SPCC576.14

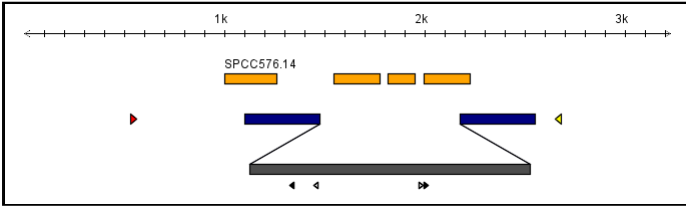

SPCC576.15c

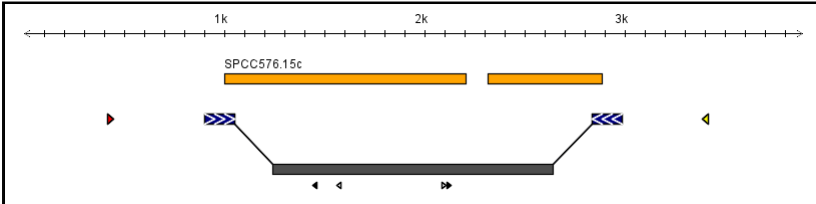

SPCC576.17c

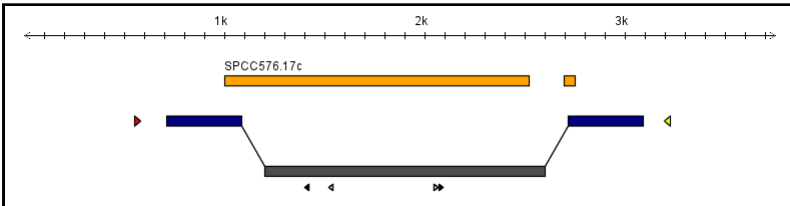

SPCC584.02

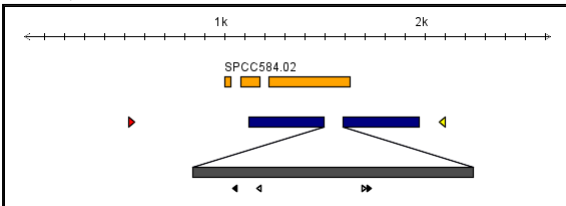

SPCC584.03c

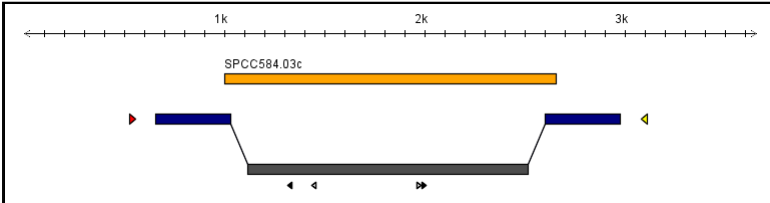

SPCC584.05

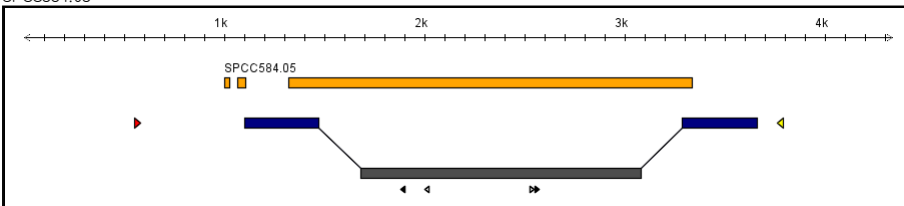

SPCC584.11c

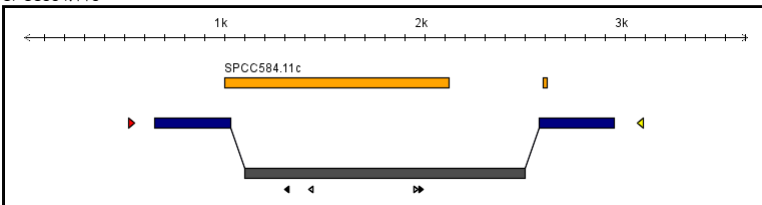

SPCC584.12

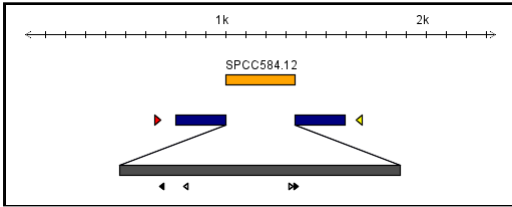

SPCC584.13

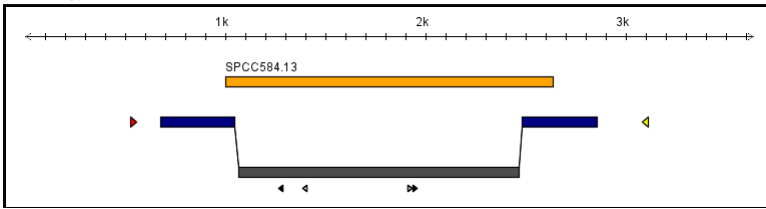

SPCC584.14

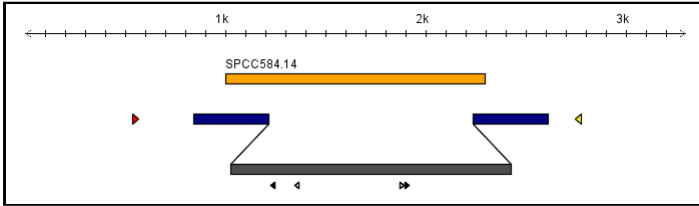

SPCC584.16c

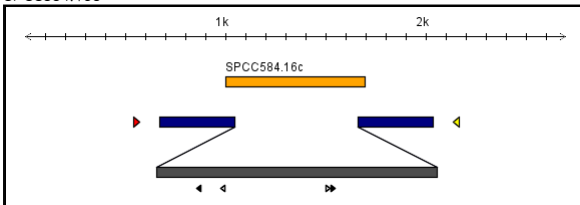

SPCC594.01

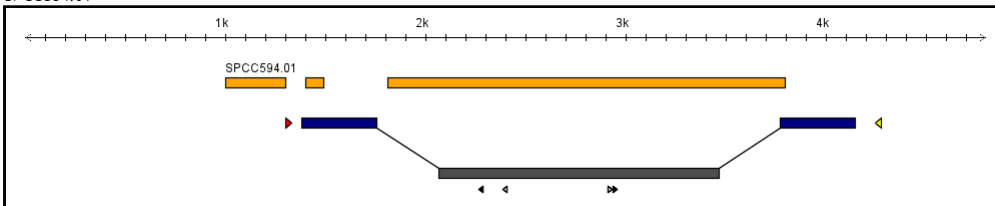

SPCC594.02c

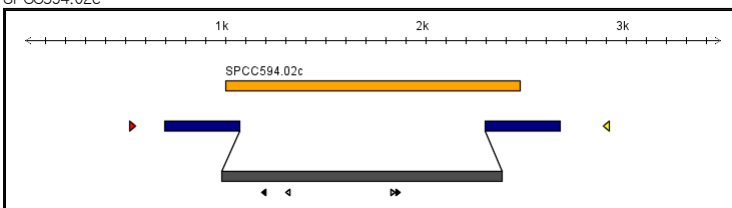

SPCC594.04c

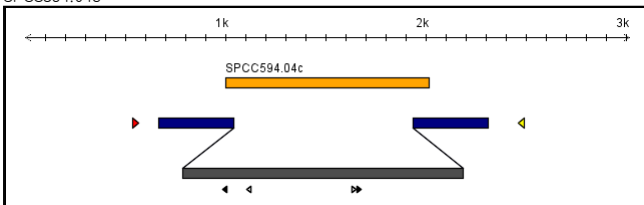

SPCC594.05c

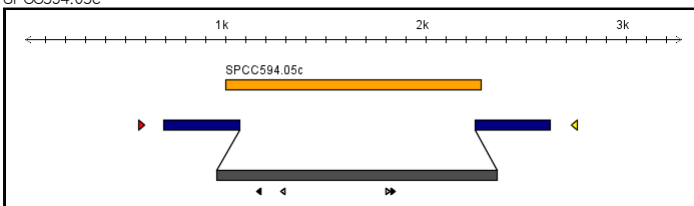

SPCC594.06c

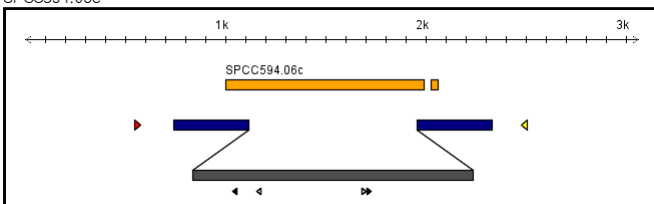



SPCC594.07c

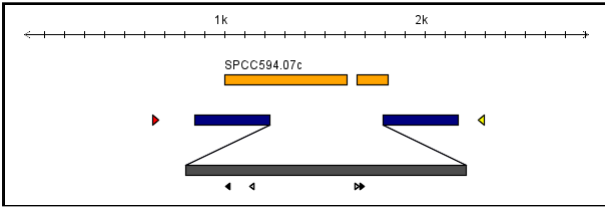

SPCC5E4.03c

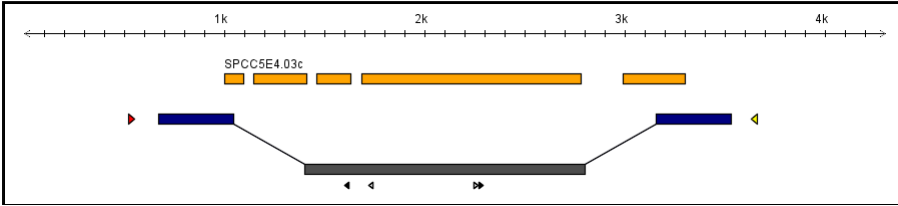

SPCC5E4.05c

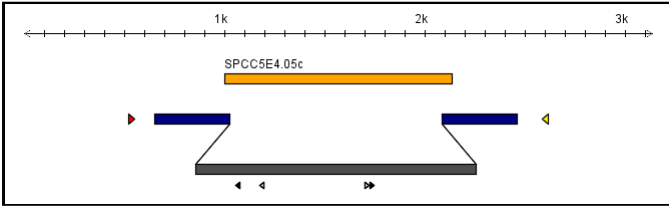

SPCC5E4.07

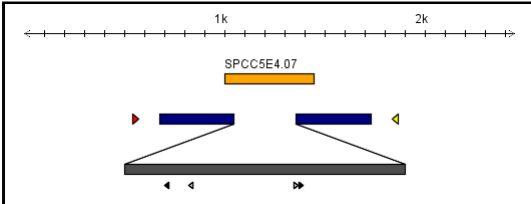

SPCC5E4.10c

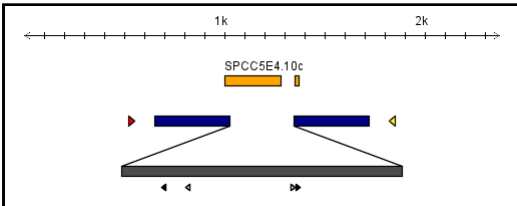

SPCC61.02

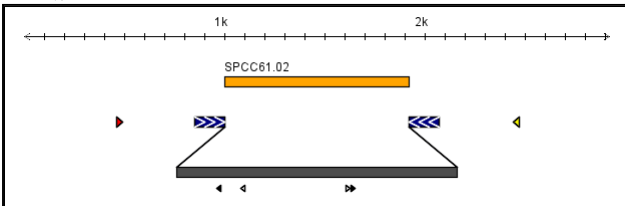

SPCC61.03

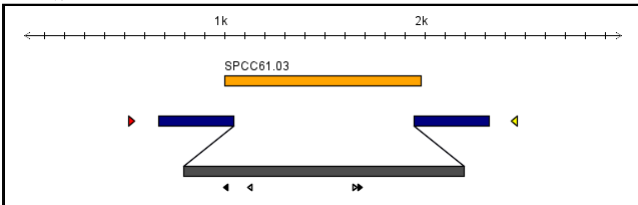

SPCC61.04c

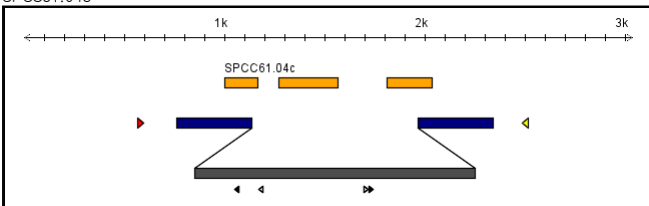

SPCC61.05

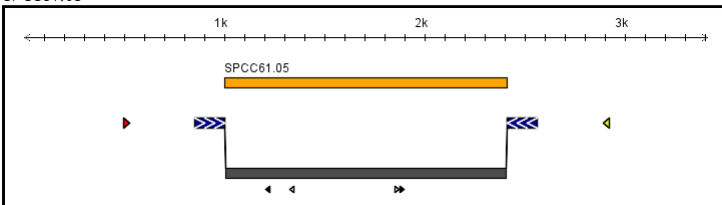

SPCC613.02

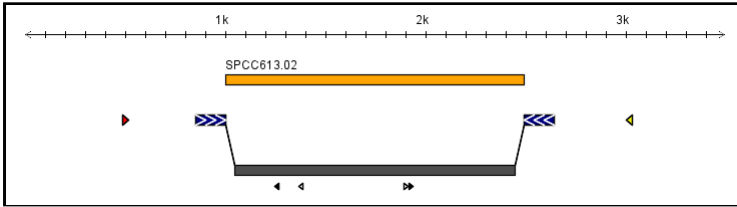

SPCC613.03

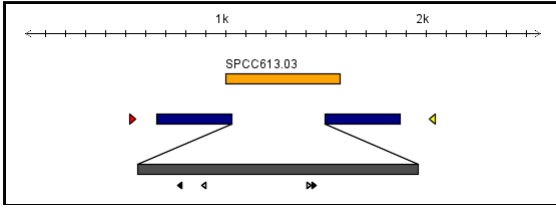

SPCC613.05c

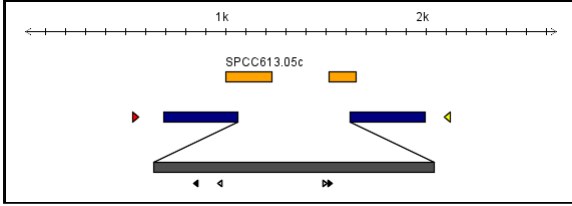

SPCC613.06

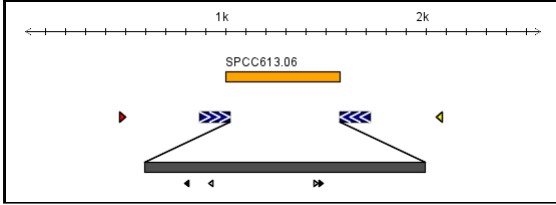

SPCC613.07

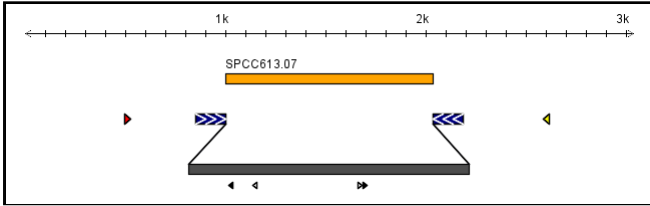

SPCC613.08

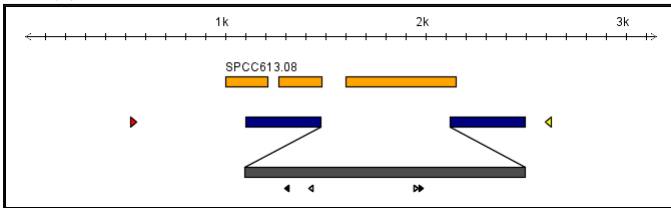

SPCC613.09

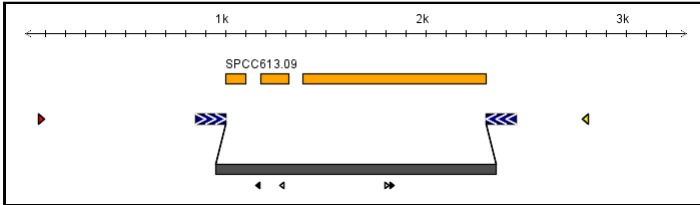

SPCC613.10

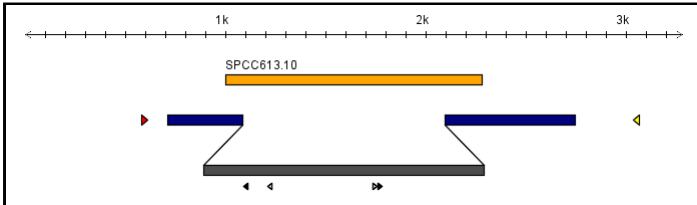

SPCC613.11c

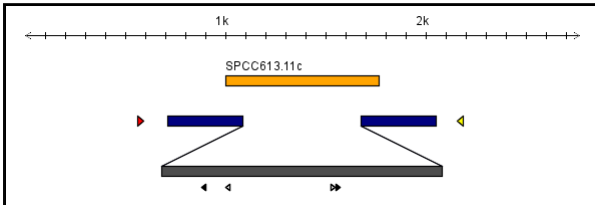

SPCC613.12c

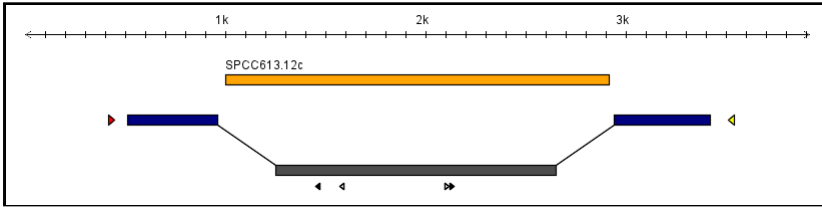

SPCC622.01c

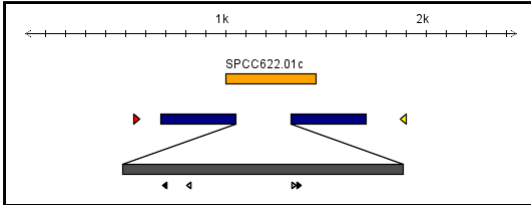

SPCC622.08c

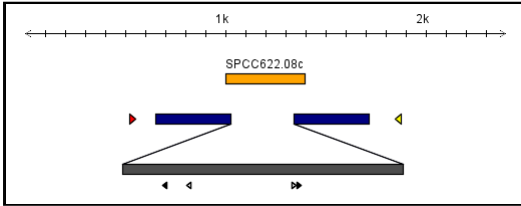

SPCC622.09

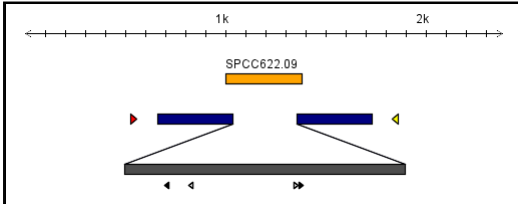

SPCC622.11

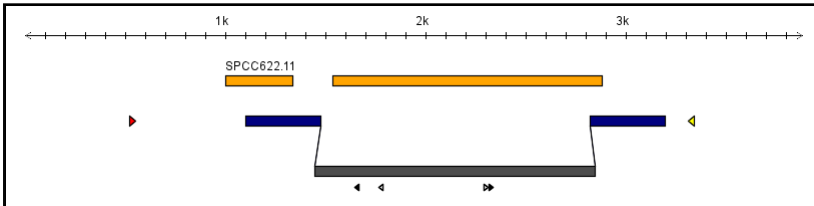

SPCC622.12c

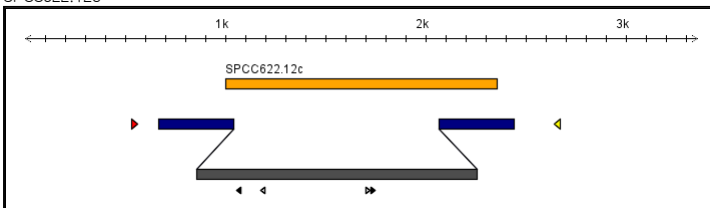

SPCC622.14

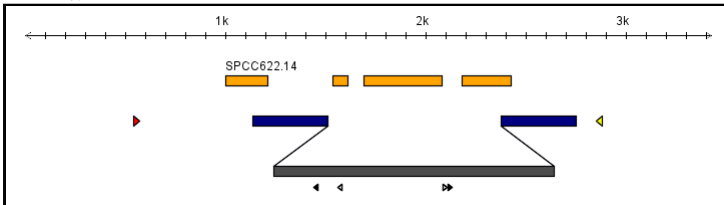

SPCC622.15c

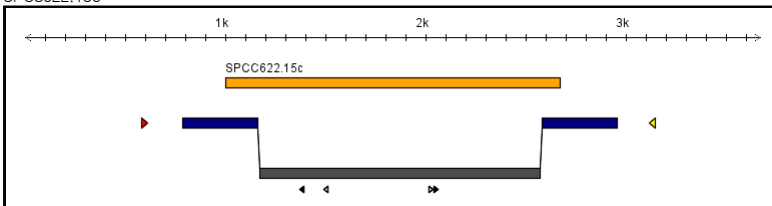

SPCC622.17

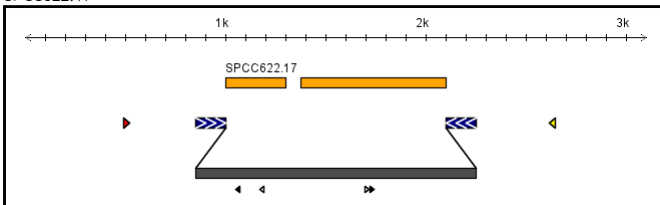

SPCC622.18

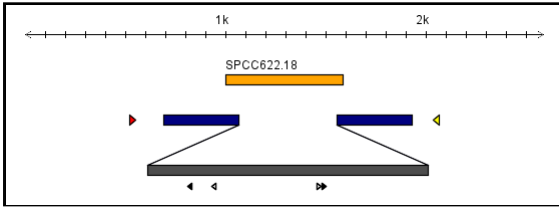

SPCC622.19

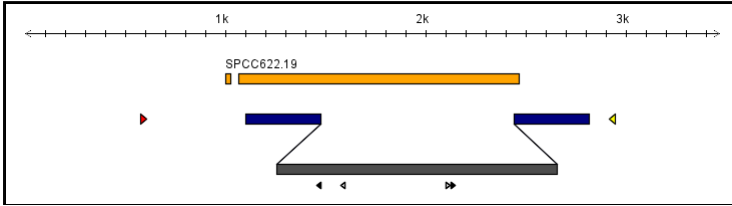

SPCC63.02c

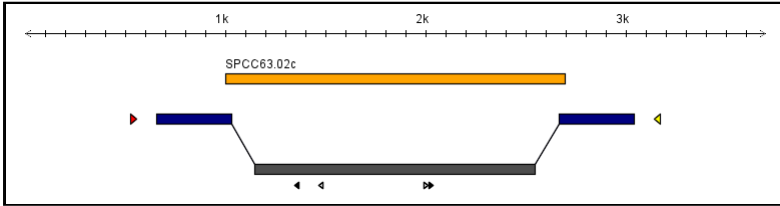

SPCC63.03

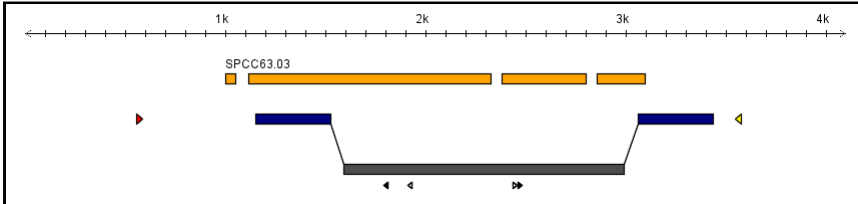

SPCC63.05

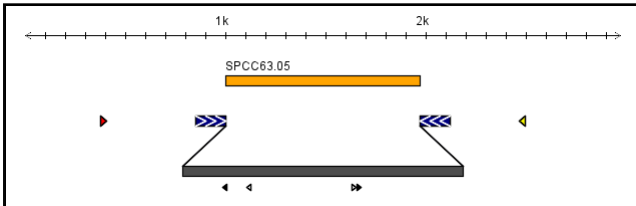

SPCC63.06

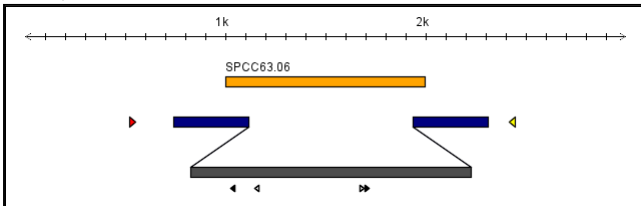

SPCC63.07

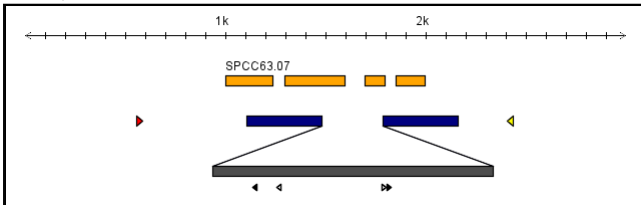

SPCC63.08c

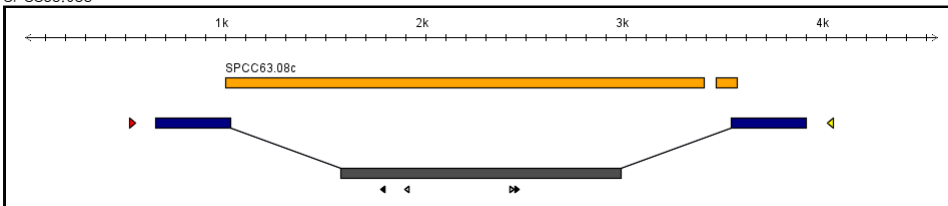

SPCC63.10c

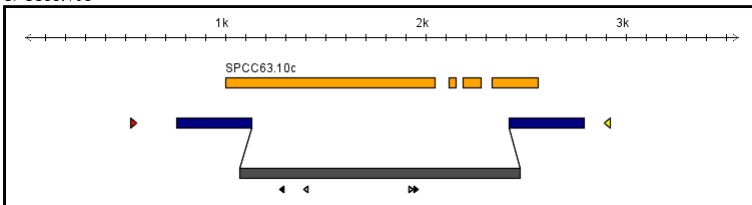

SPCC63.11

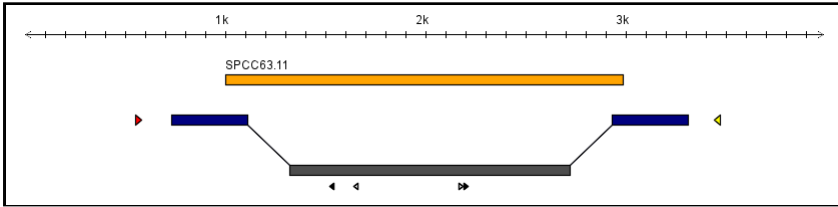

SPCC63.12c

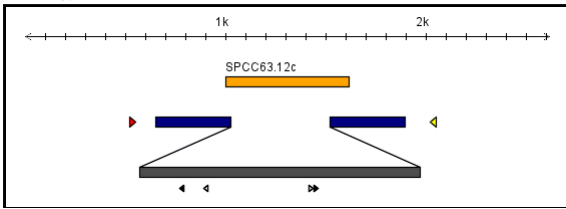

SPCC63.13

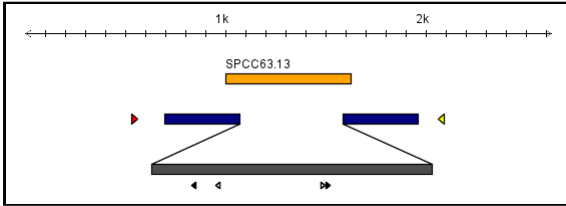

SPCC645.02

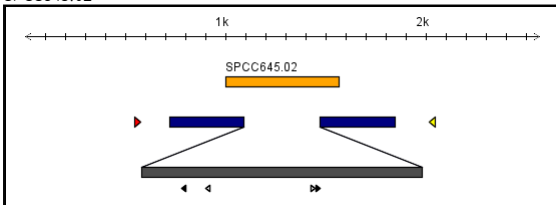

SPCC645.03c

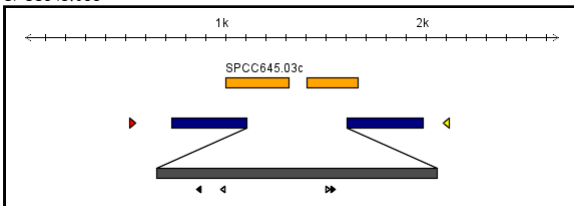

SPCC645.04

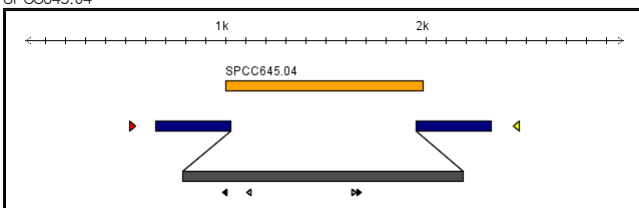

SPCC645.08c

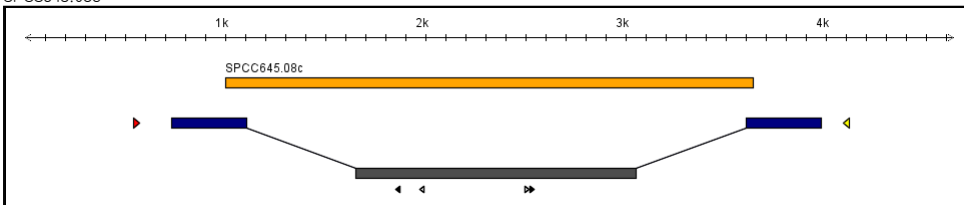

SPCC645.09

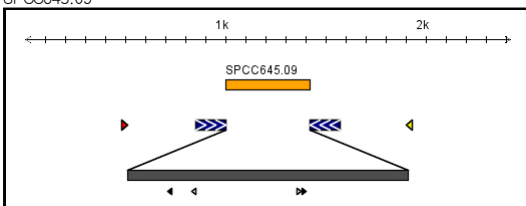

SPCC645.10

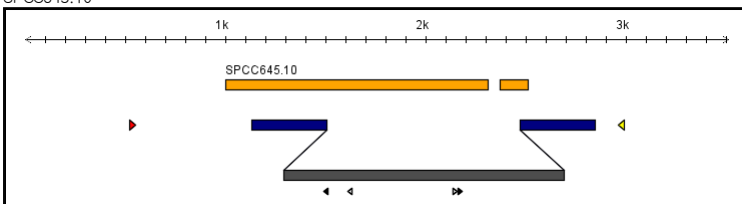

SPCC645.11c

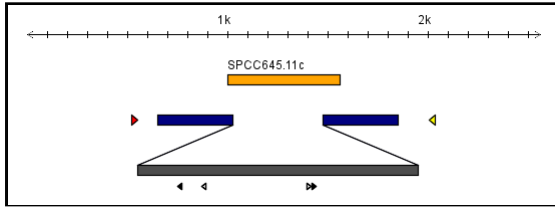

SPCC645.12c

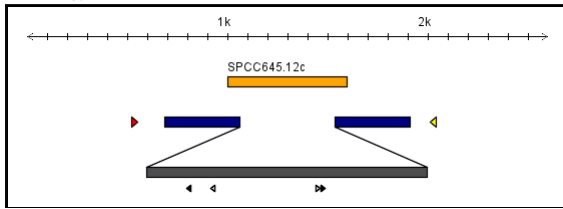

SPCC645.14c

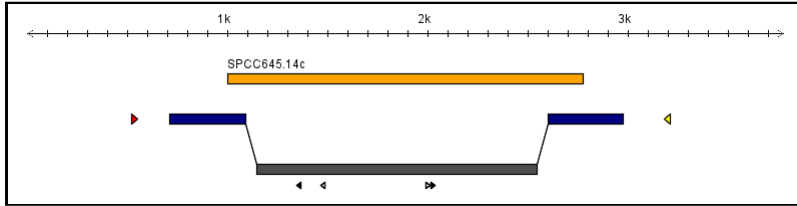

SPCC663.01c

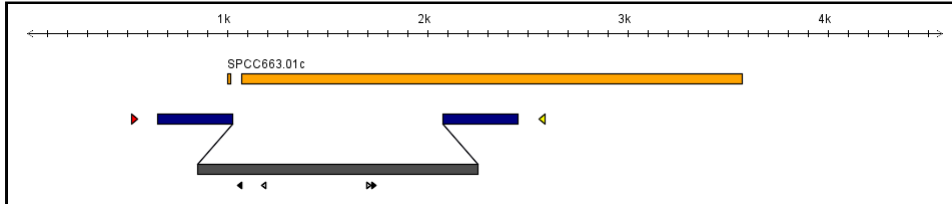

SPCC663.02

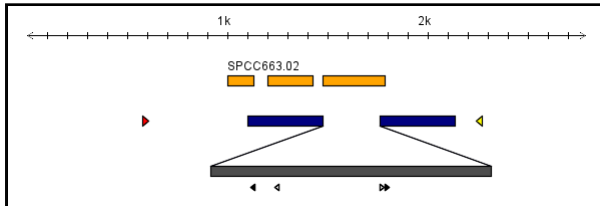

SPCC663.04

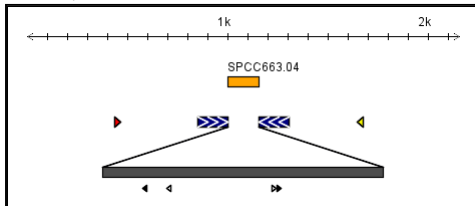

SPCC663.05c

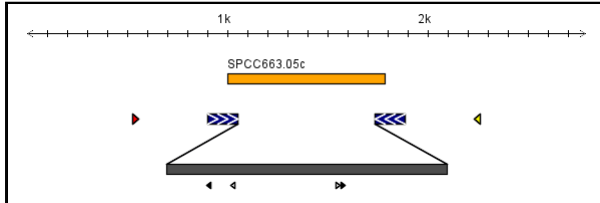

SPCC663.06c

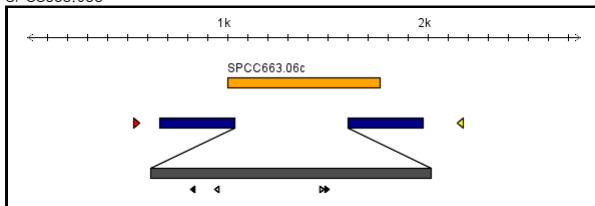

SPCC663.08c

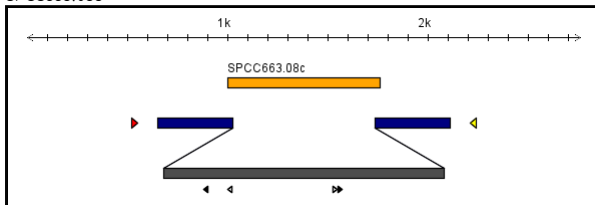

SPCC663.09c

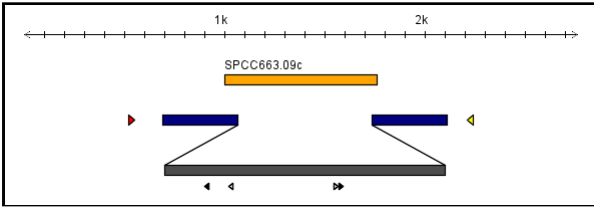

SPCC663.10

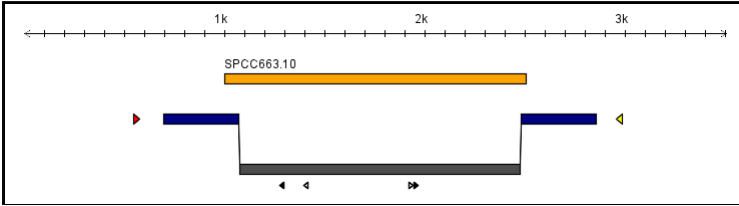

SPCC663.11

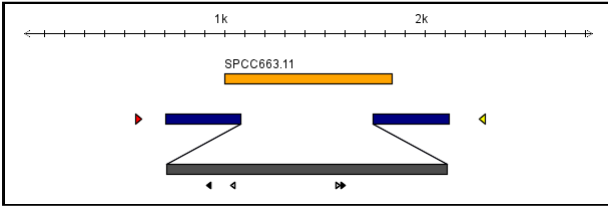

SPCC663.12

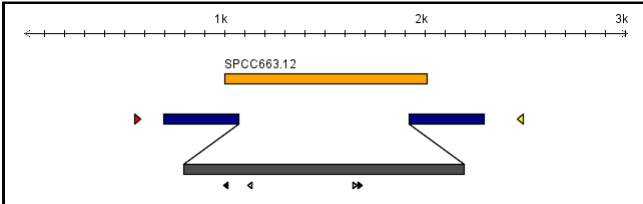

SPCC663.13c

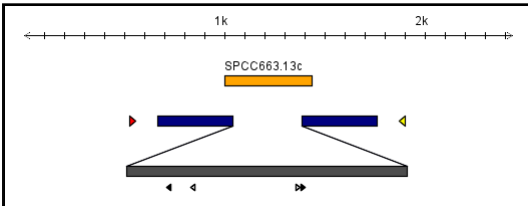

SPCC663.14c

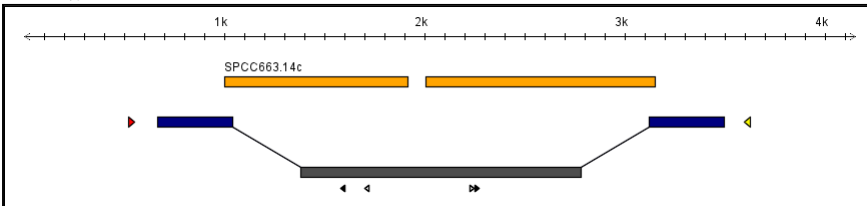

SPCC663.15c

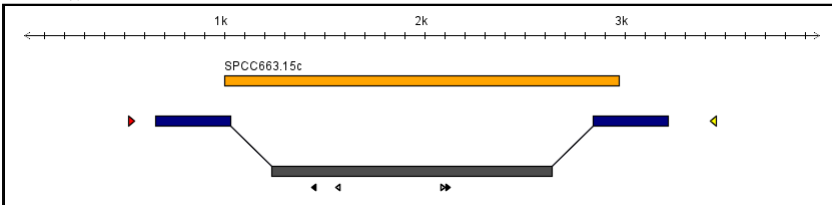

SPCC70.02c

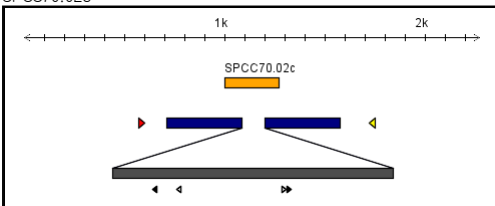

SPCC70.03c

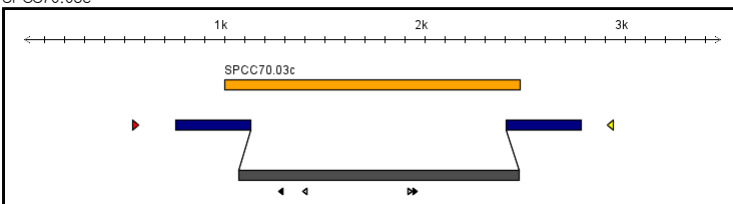

SPCC70.04c

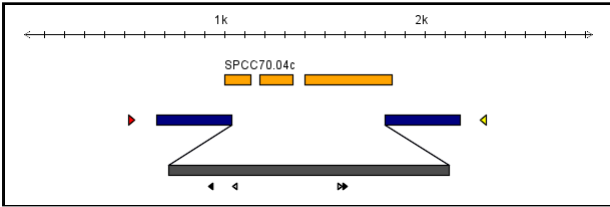

SPCC70.06

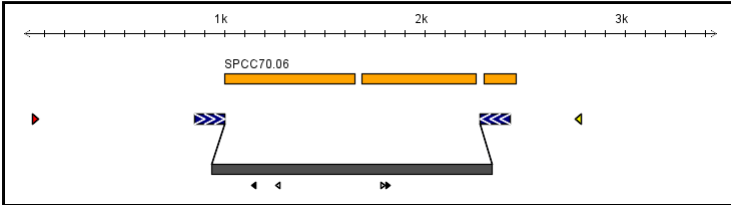

SPCC70.07c

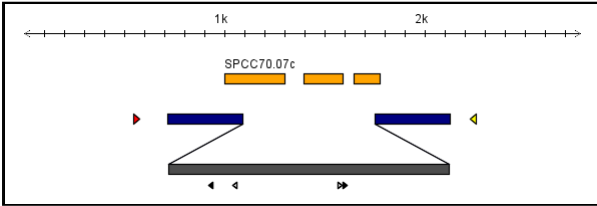

SPCC70.08c

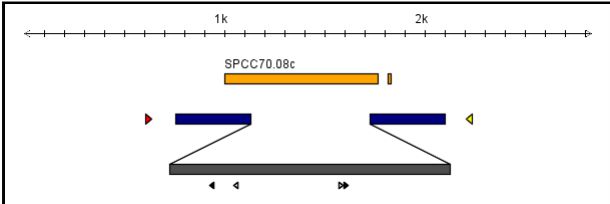

SPCC70.09c

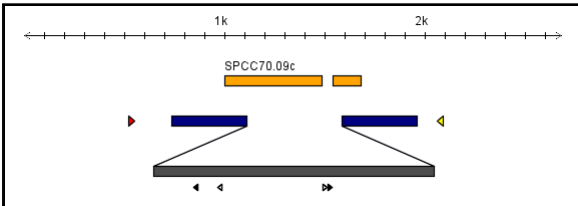

SPCC70.10

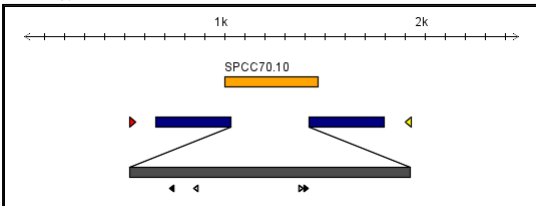

SPCC736.02

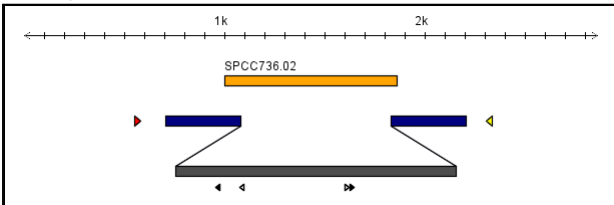

SPCC736.03c

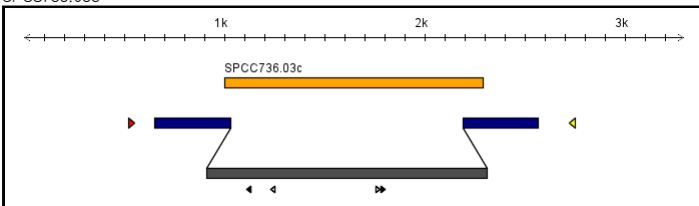

SPCC736.04c

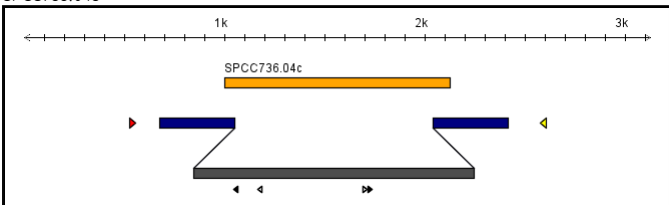



SPCC736.07c

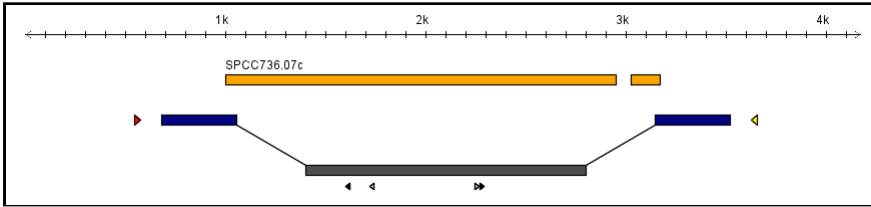

SPCC736.08

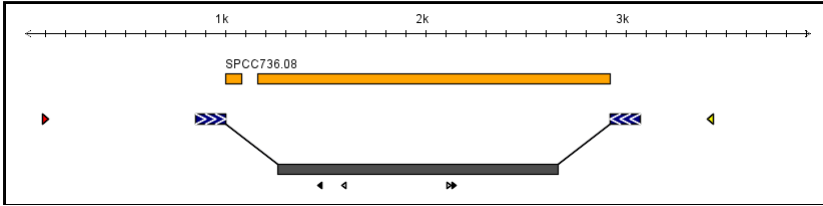

SPCC736.09c

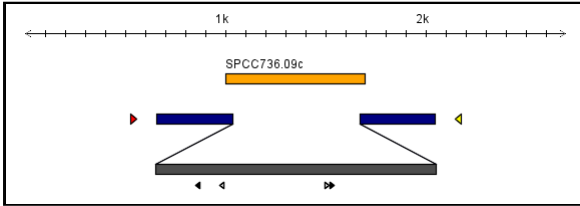

SPCC736.10c

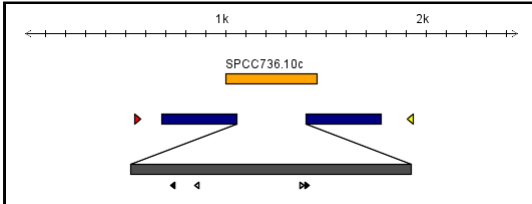

SPCC736.12c

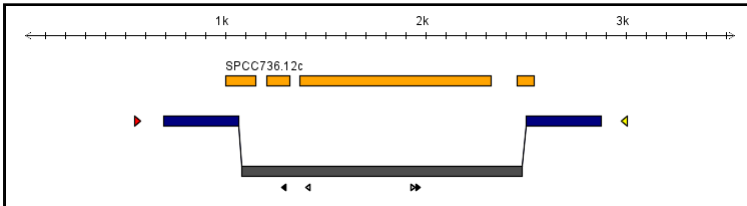

SPCC736.13

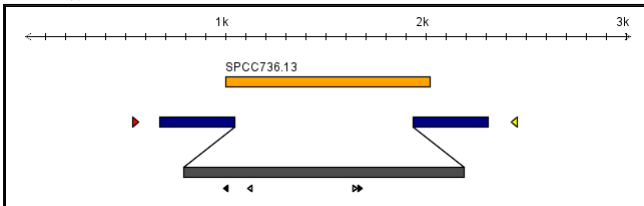

SPCC736.15

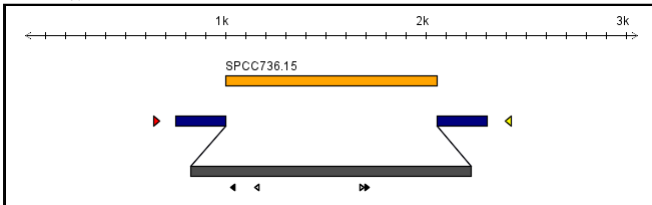

SPCC737.02c

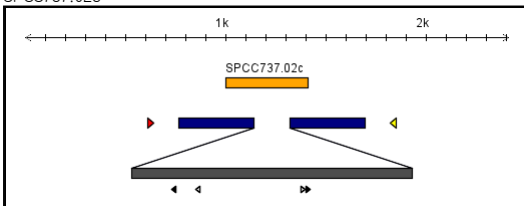

SPCC737.03c

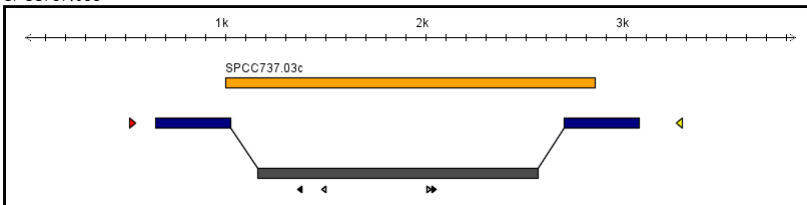

SPCC737.04

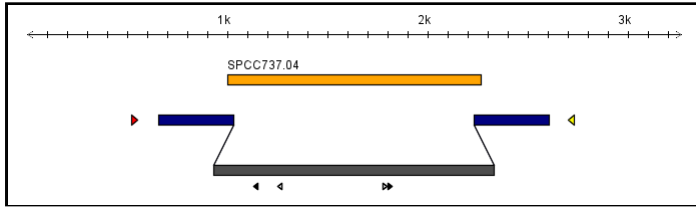

SPCC737.05

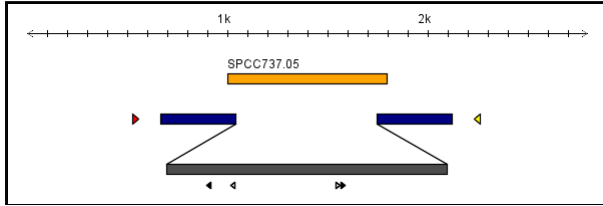

SPCC737.06c

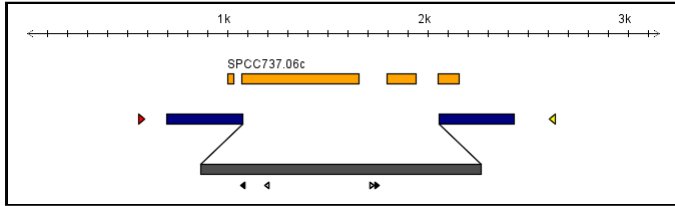

SPCC737.07c

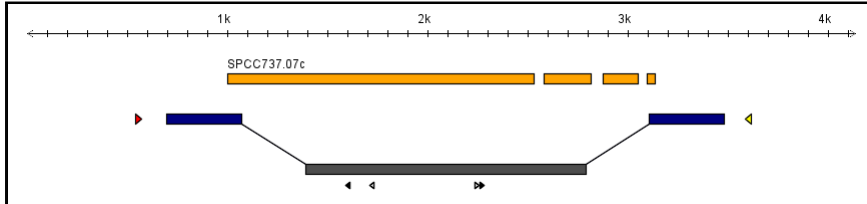

SPCC737.09c

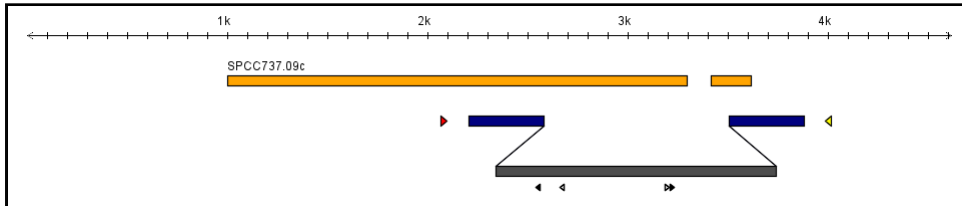

SPCC74.01

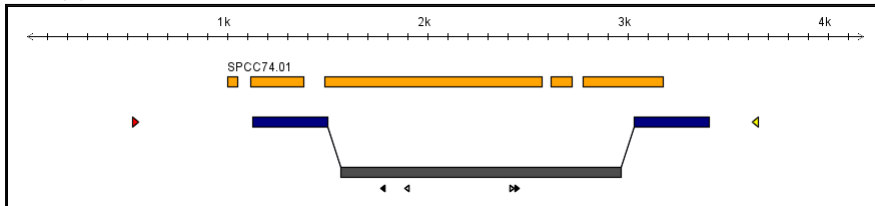

SPCC74.02c

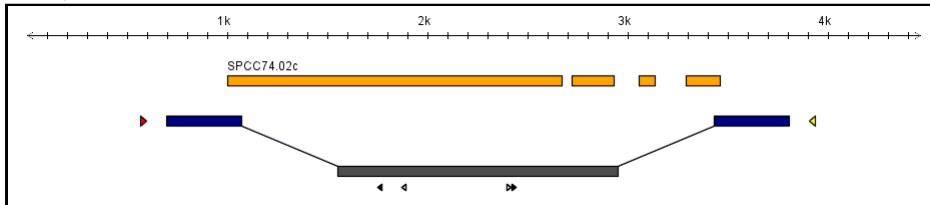

SPCC74.03c

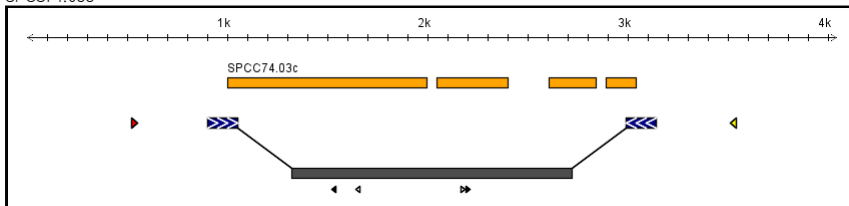

SPCC74.04

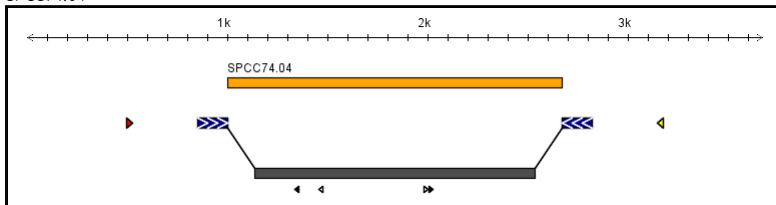

SPCC74.05

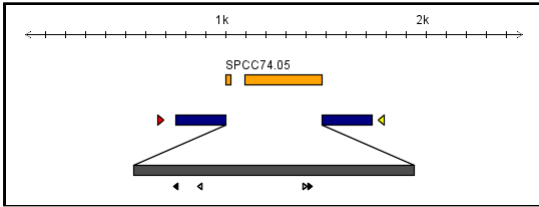

SPCC74.09

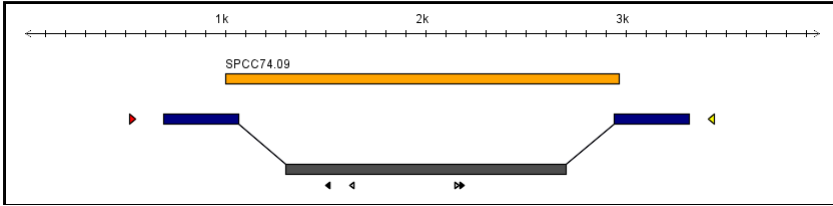

SPCC757.02c

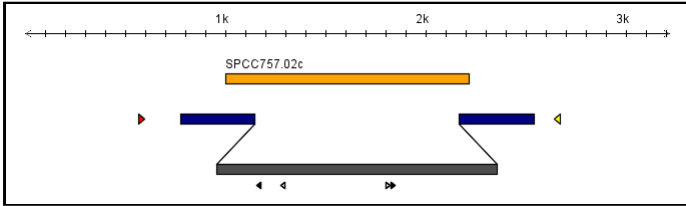

SPCC757.03c

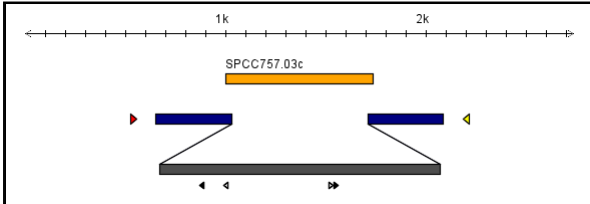

SPCC757.05c

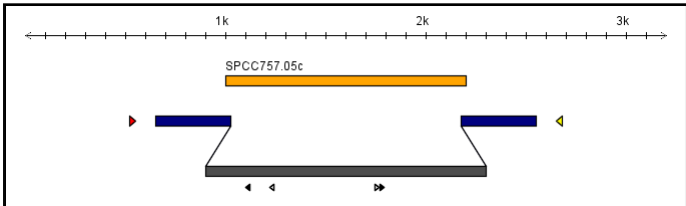

SPCC757.07c

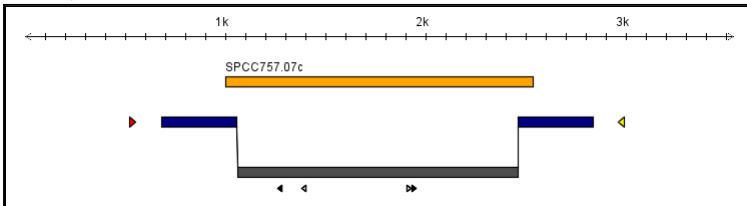

SPCC757.08

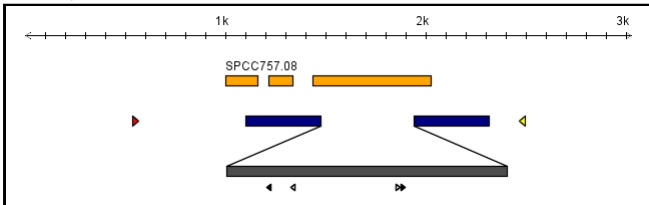

SPCC757.09c

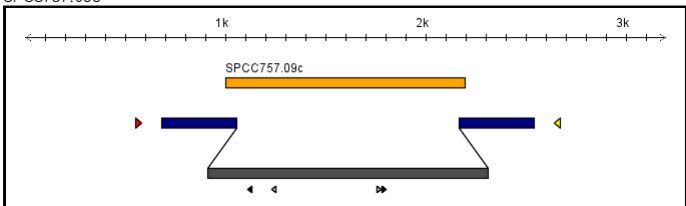

SPCC757.10

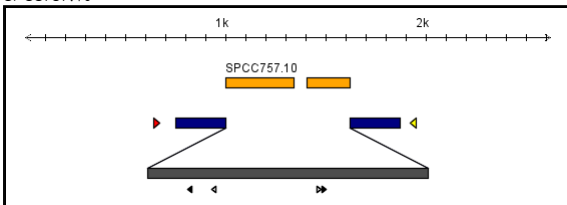

SPCC757.11c

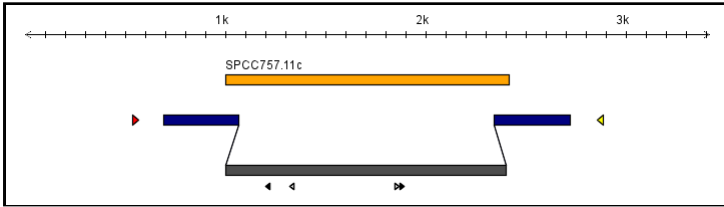

SPCC757.12

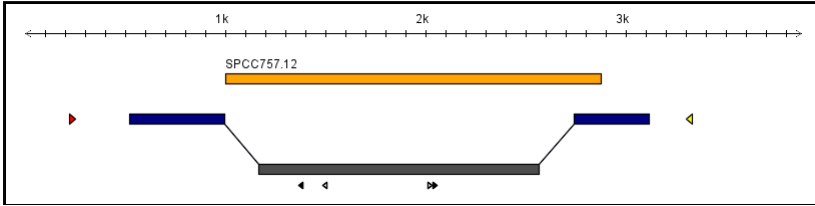

SPCC757.13

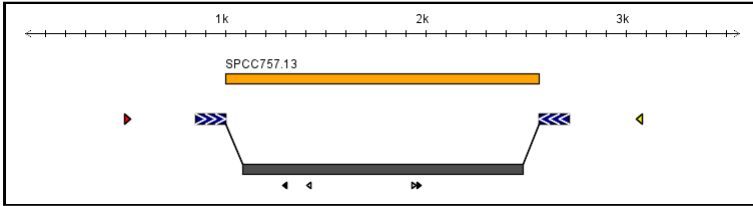

SPCC777.02

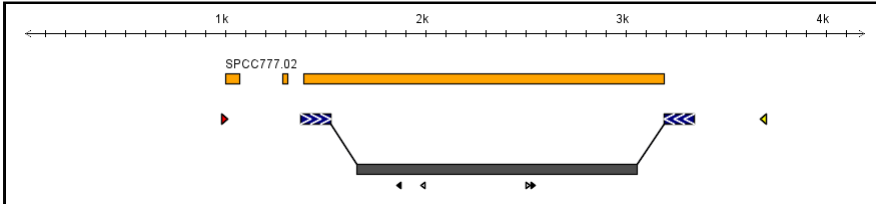

SPCC777.03c

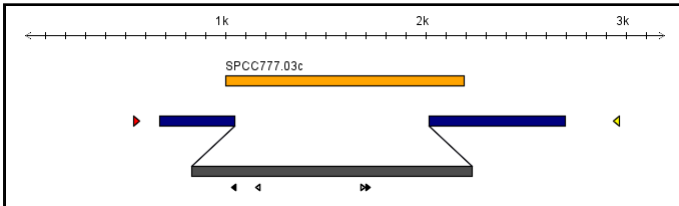

SPCC777.04

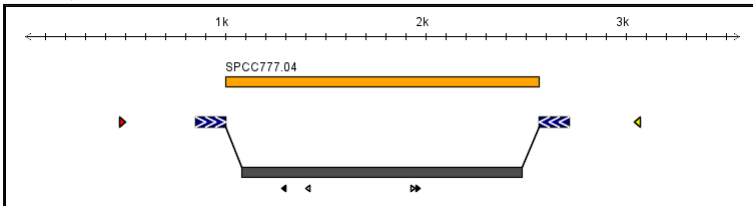

SPCC777.05

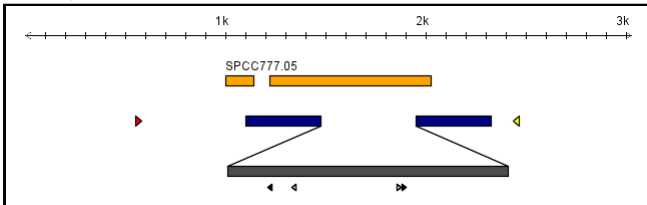

SPCC777.06c

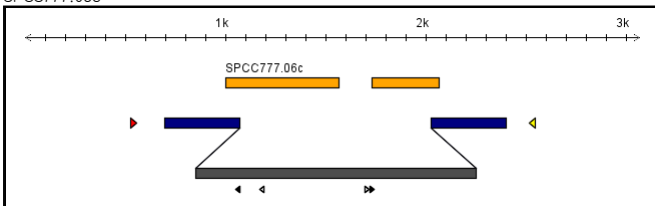

SPCC777.07

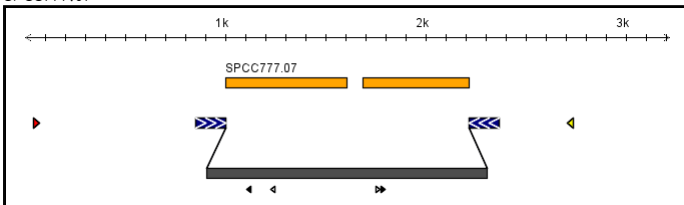

SPCC777.08c

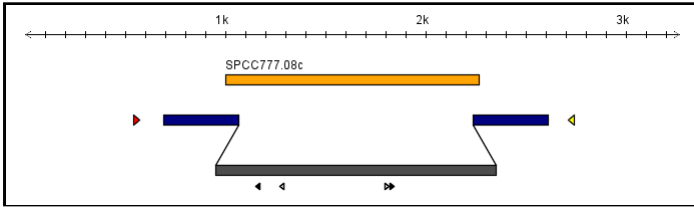

SPCC777.09c

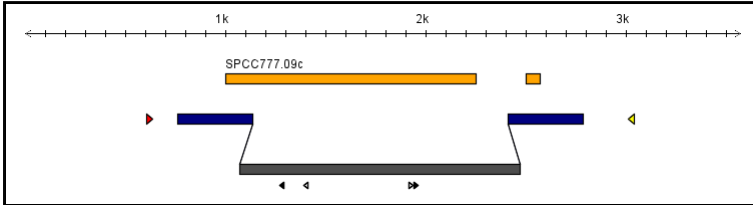

SPCC777.10c

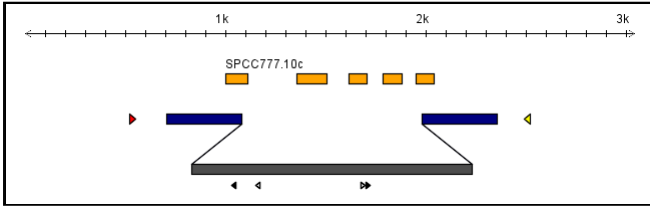

SPCC777.11

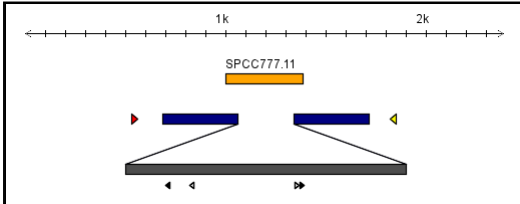

SPCC777.12c

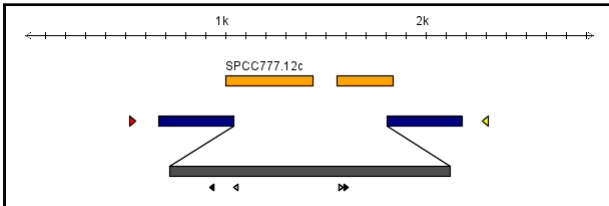

SPCC777.13

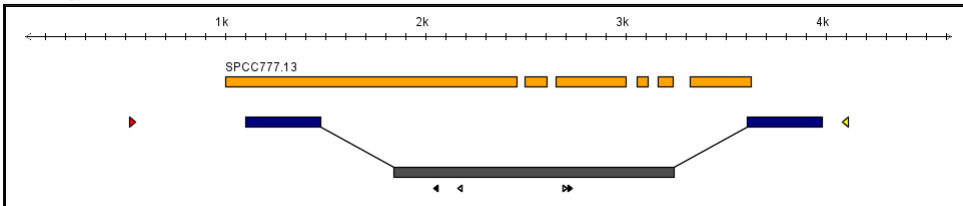

SPCC777.14

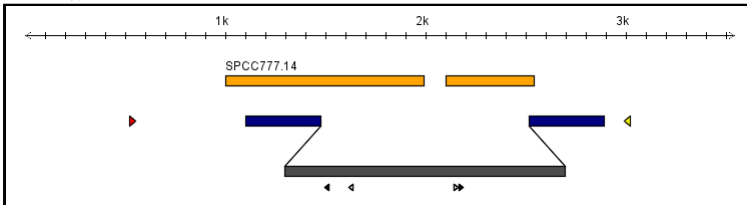

SPCC777.15

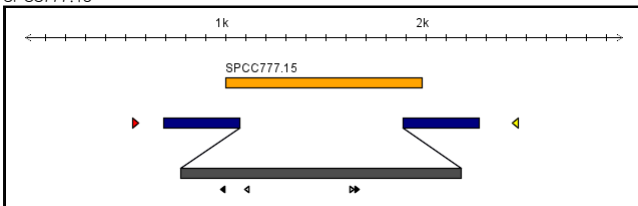

SPCC777.17c

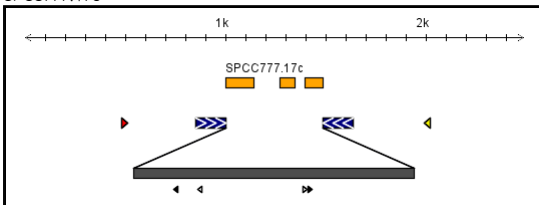

SPCC790.03

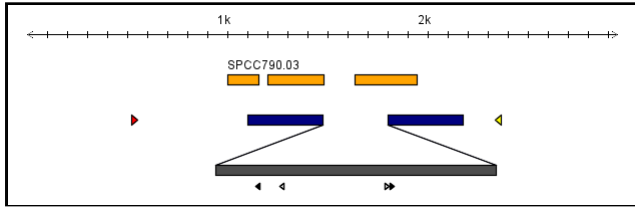

SPCC794.01c

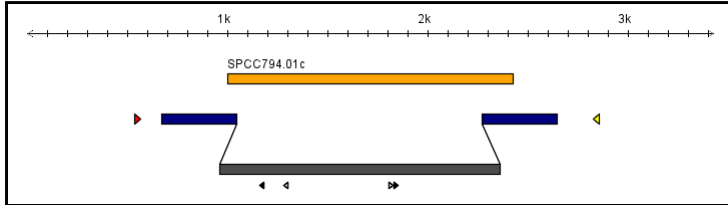

SPCC794.02

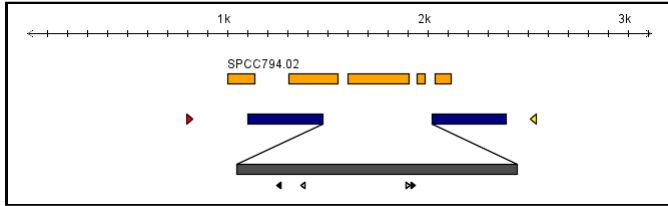

SPCC794.03

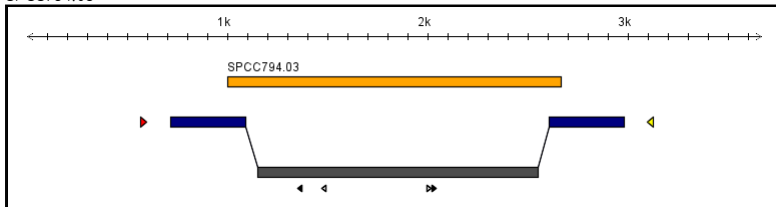

SPCC794.04c

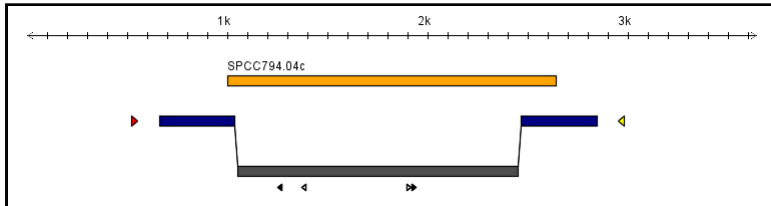

SPCC794.06

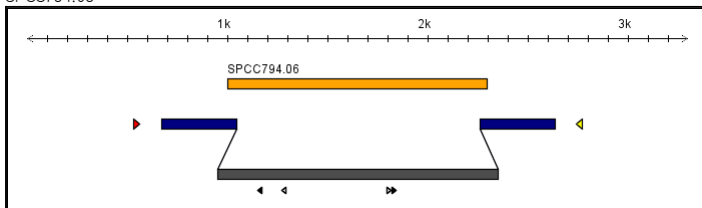

SPCC794.07

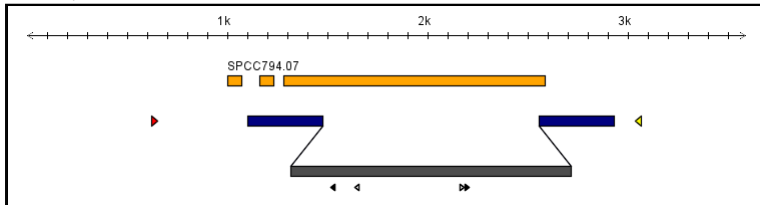

SPCC794.08

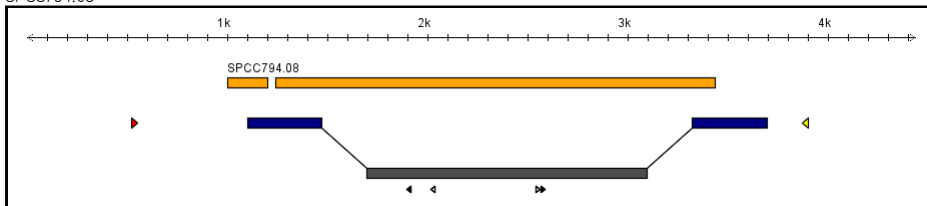

SPCC794.09c

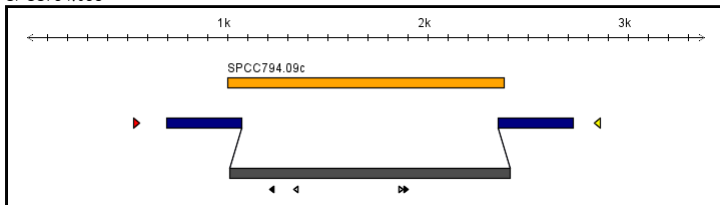

SPCC794.10

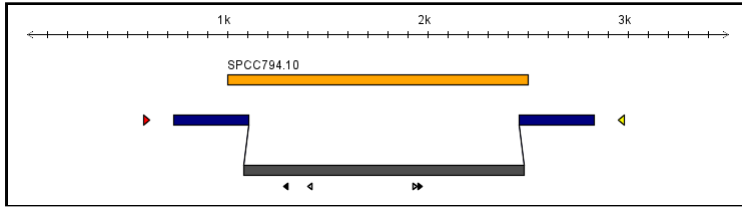

SPCC794.11c

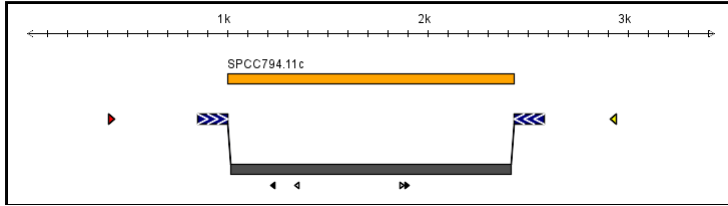

SPCC794.12c

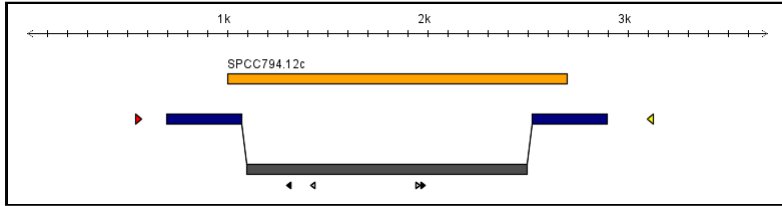

SPCC794.15

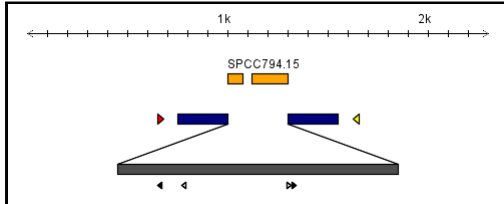

SPCC825.02

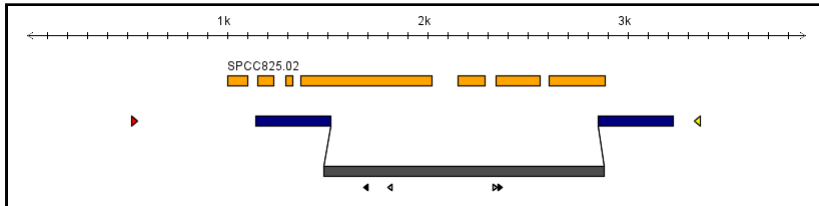

SPCC825.03c

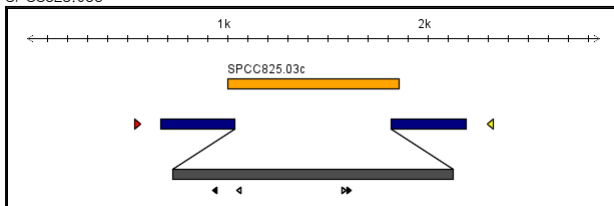

SPCC825.04c

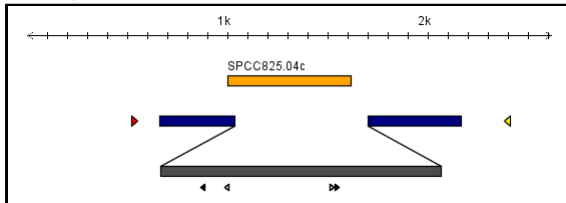

SPCC825.05c

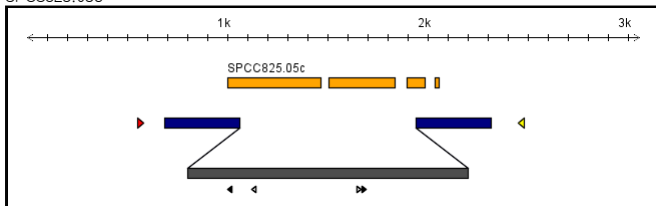

SPCC830.03

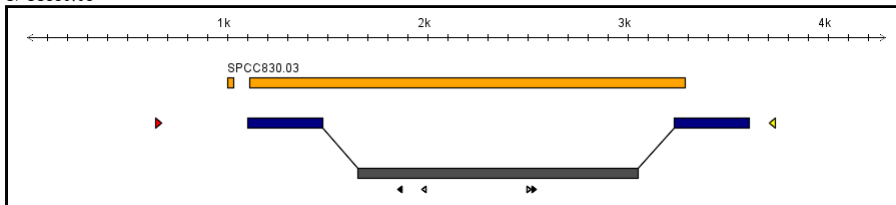

SPCC830.04c

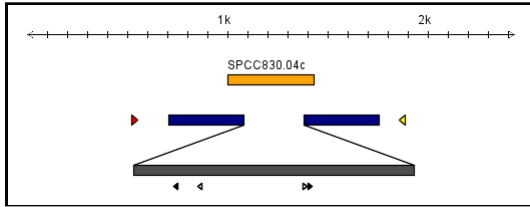

SPCC830.05c

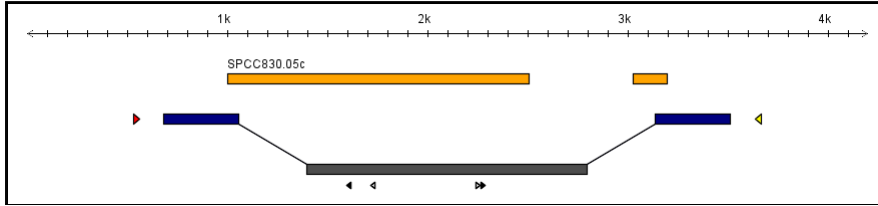

SPCC830.07c

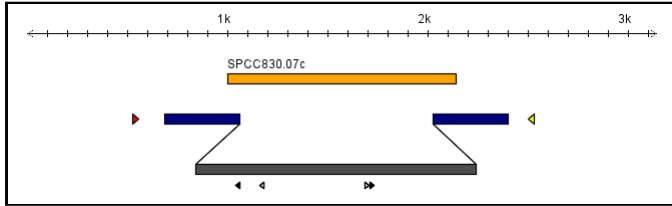

SPCC830.08c

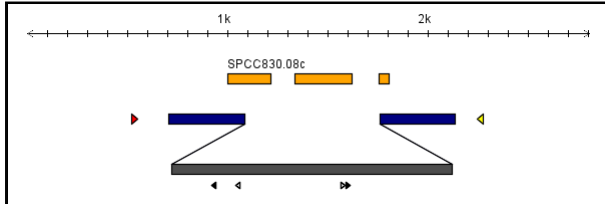

SPCC830.09c

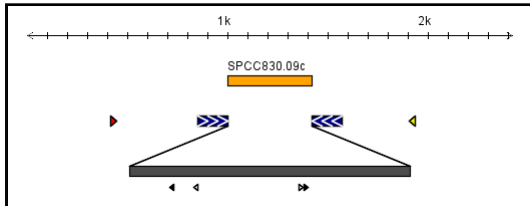

SPCC830.10

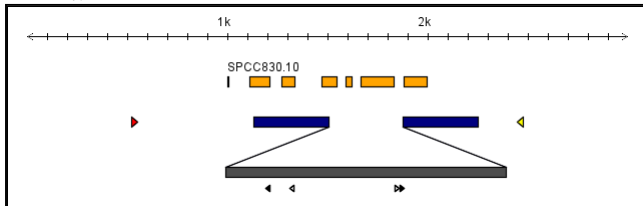

SPCC830.11c

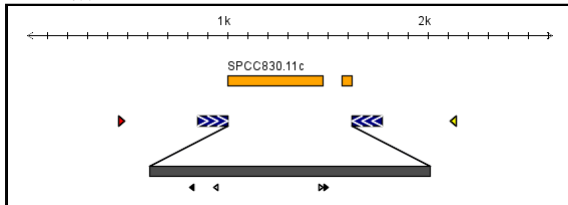

SPCC895.03c

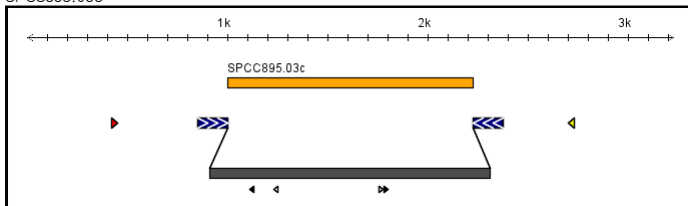

SPCC895.04c

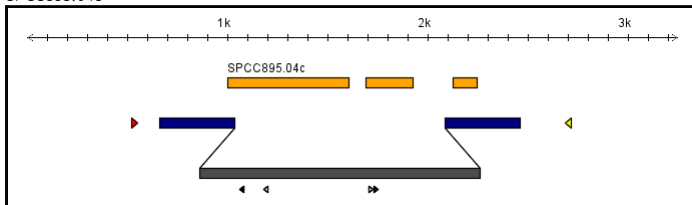



SPCC895.06

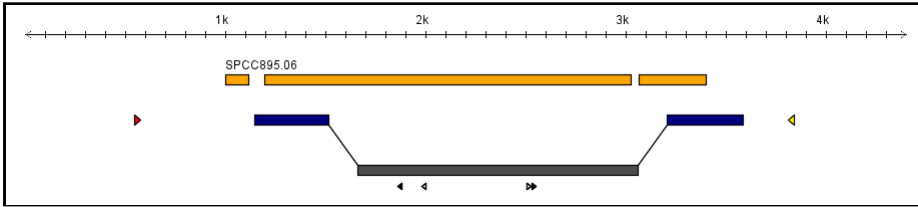

SPCC895.08c

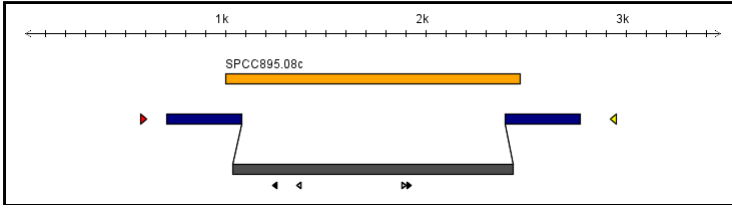

SPCC962.03c

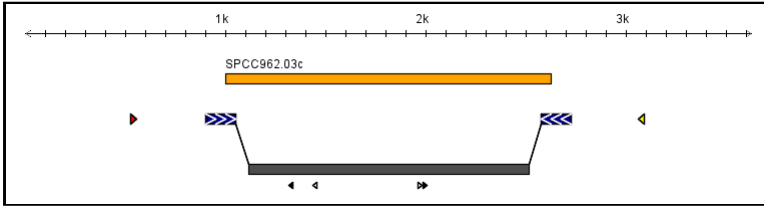

SPCC962.04

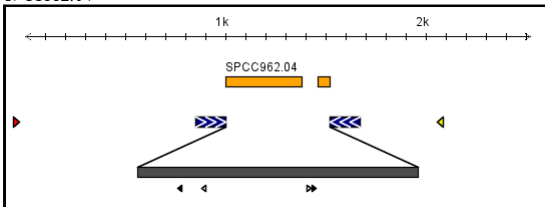

SPCC962.05

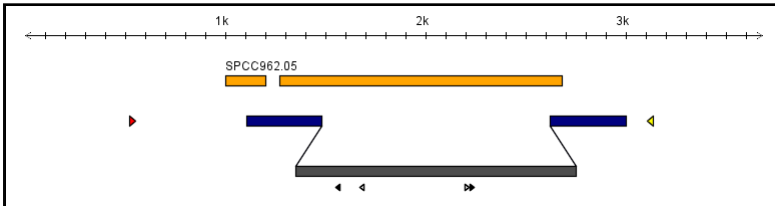

SPCC962.06c

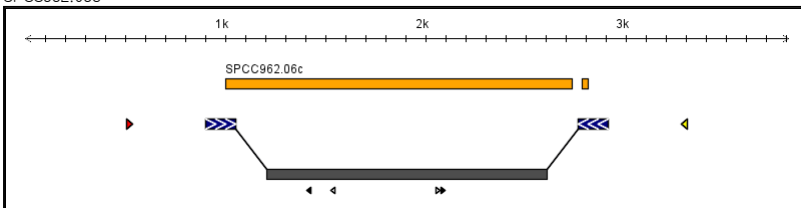

SPCC965.03

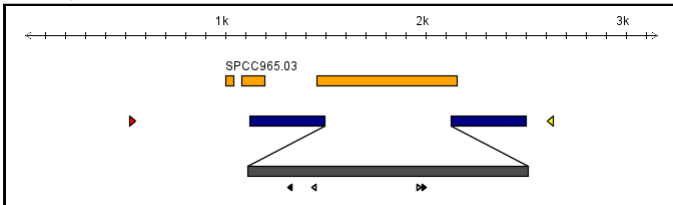

SPCC965.05c

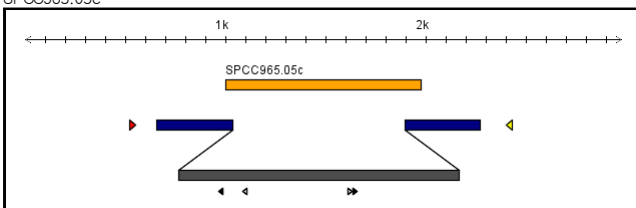

SPCC965.06

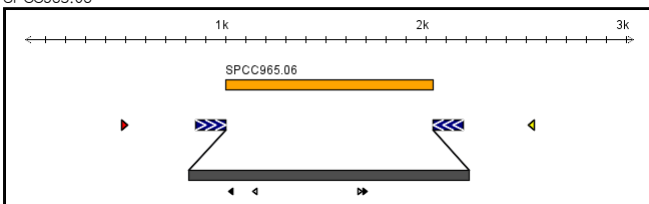

SPCC965.07c

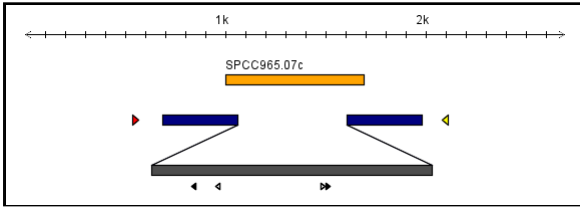

SPCC965.08c

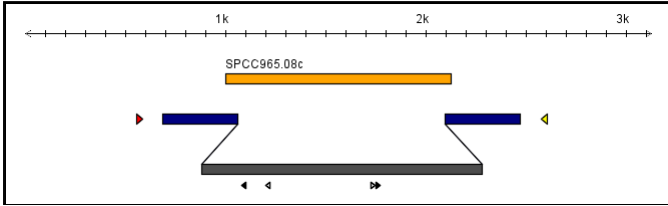

SPCC965.09

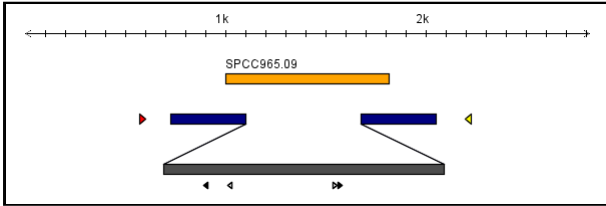

SPCC965.10

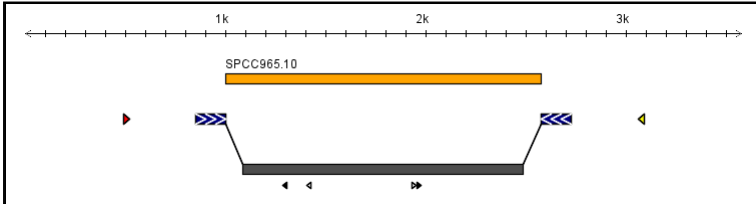

SPCC965.11c

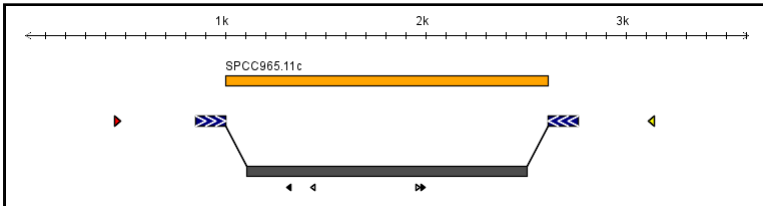

SPCC965.12

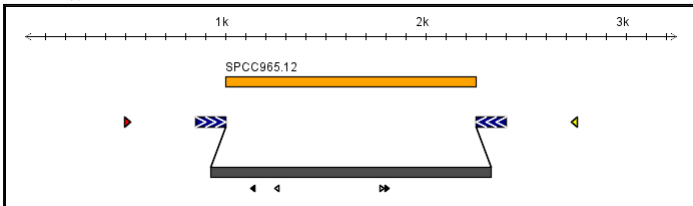

SPCC965.13

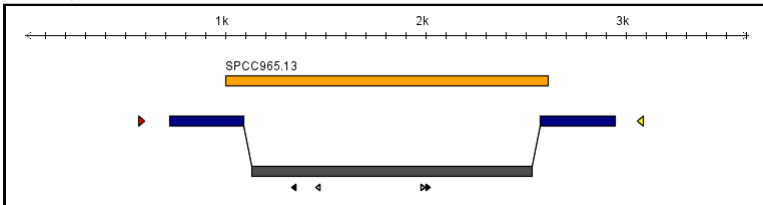

SPCC965.14c

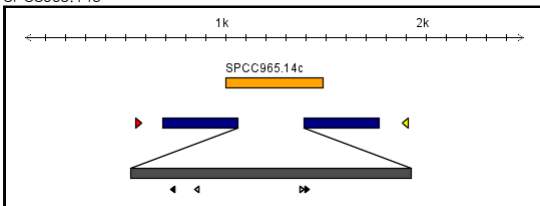

SPCC970.02

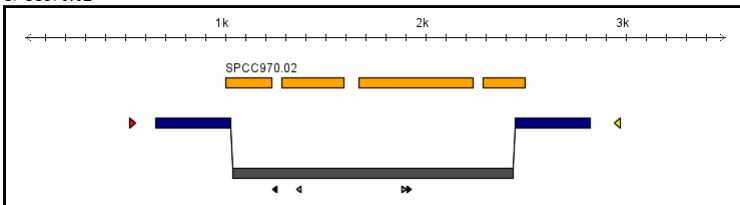

SPCC970.03

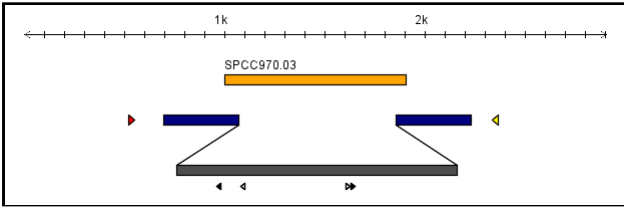

SPCC970.04c

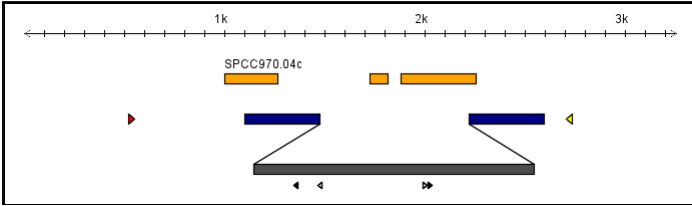

SPCC970.05

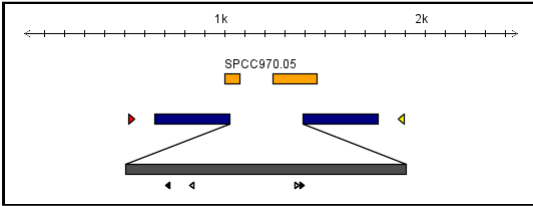

SPCC970.06

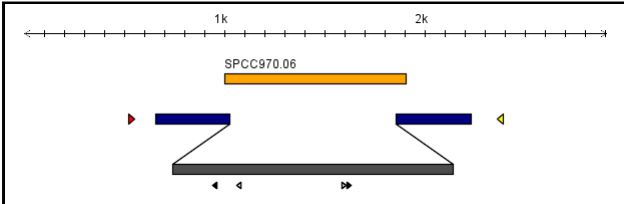

SPCC970.07c

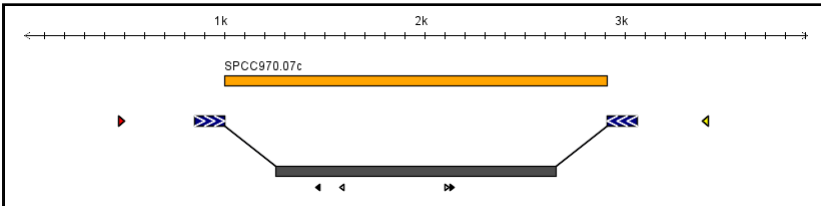

SPCC970.10c

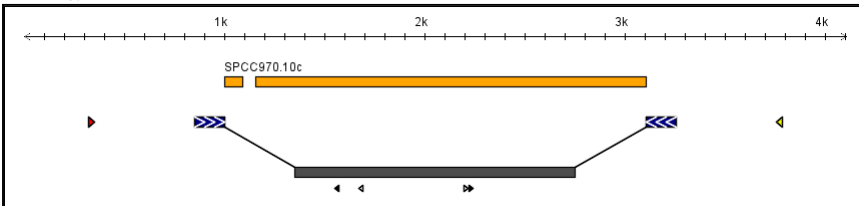

SPCC970.11c

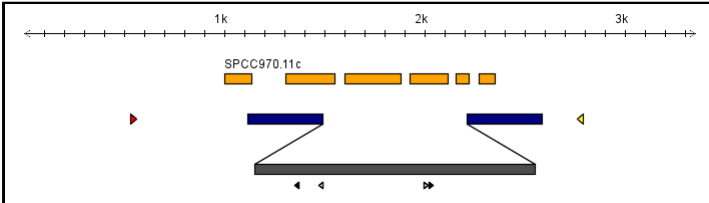

SPCC970.12

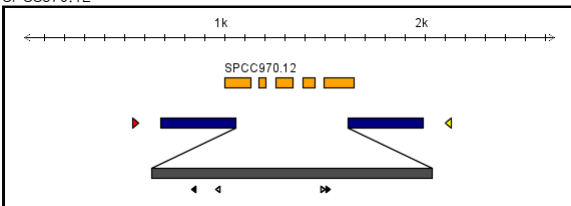

SPCP1E11.02

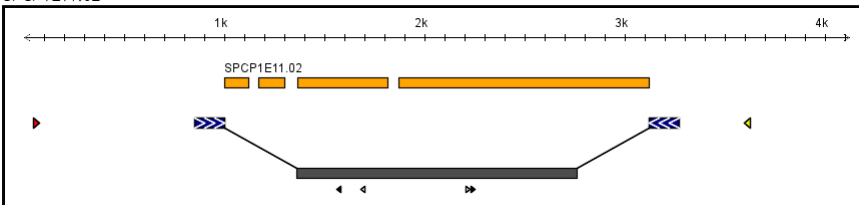

SPCP1E11.03

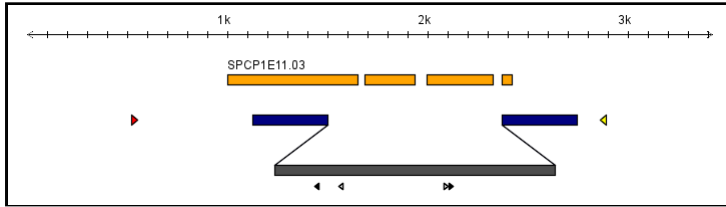

SPCP1E11.04c

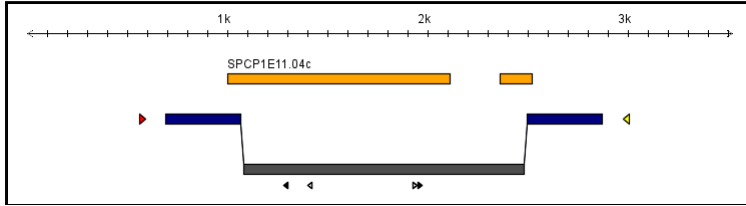

SPCP1E11.05c

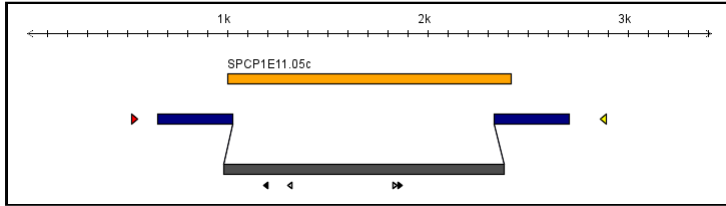

SPCP1E11.07c

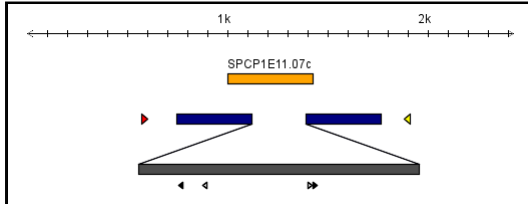

SPCP1E11.08

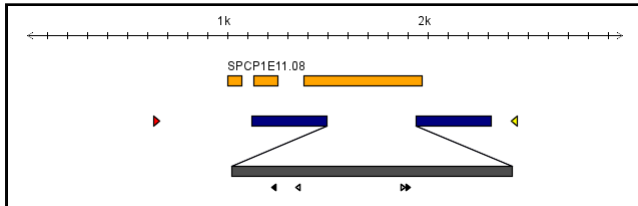

SPCP1E11.09c

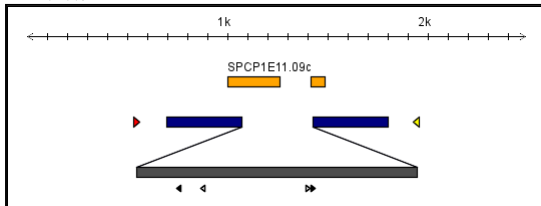

SPCP1E11.10

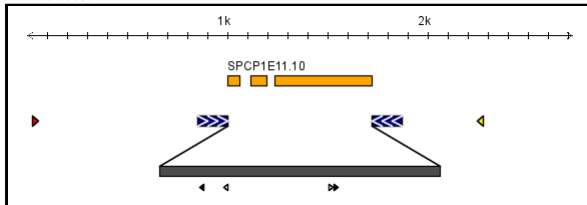

SPCP1E11.11

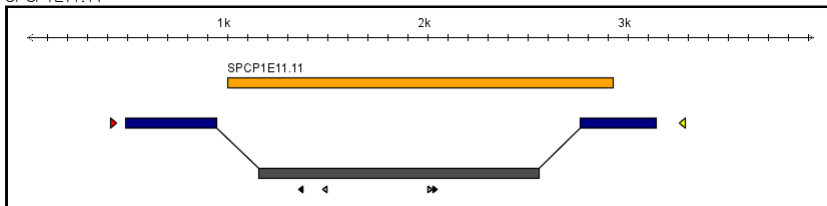

SPCP20C8.01c

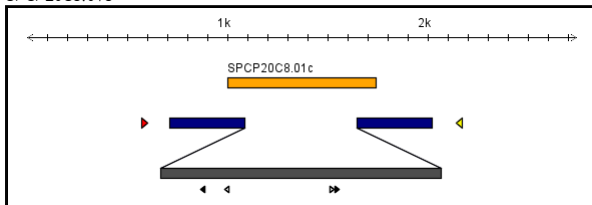

SPCP20C8.02c

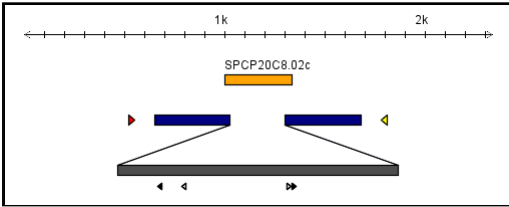

SPCP25A2.03

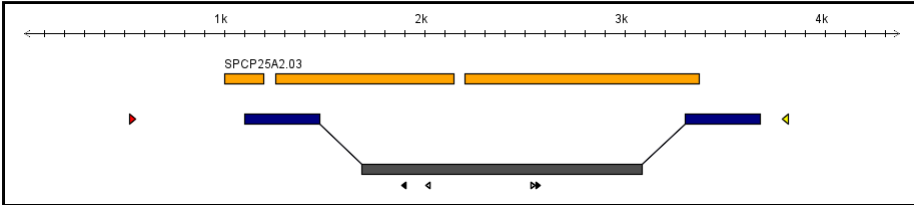

SPCP31B10.02

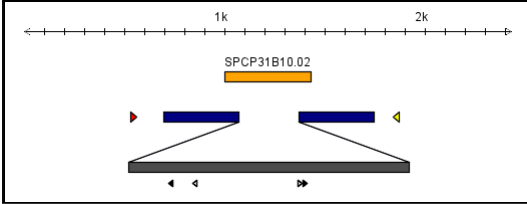

SPCP31B10.03c

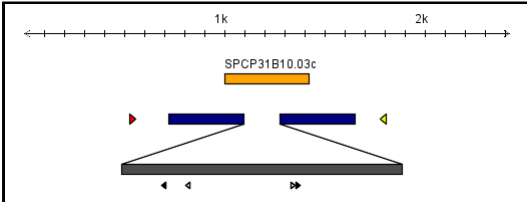

SPCP31B10.04

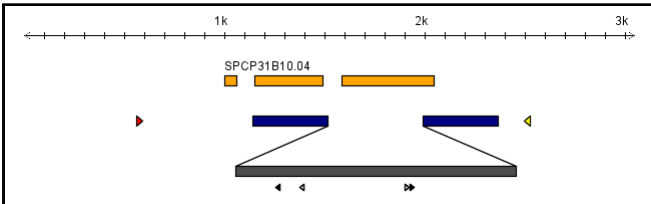

SPCP31B10.05

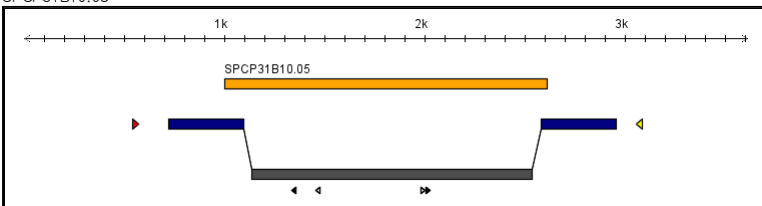

SPCP31B10.08c

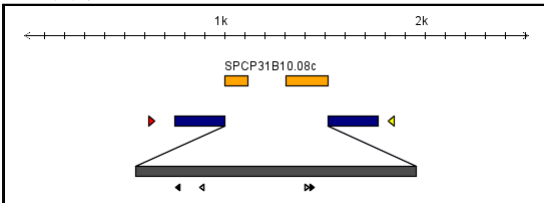

SPCPB16A4.02c

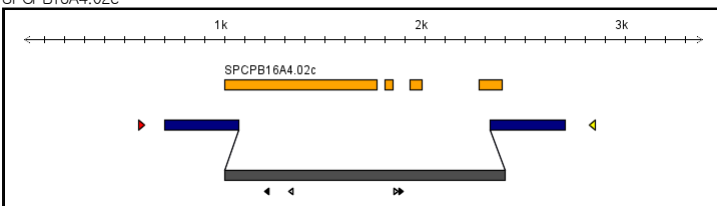

SPCPB16A4.03c

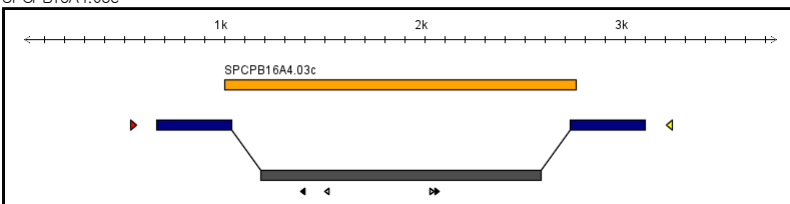

SPCPB16A4.04c

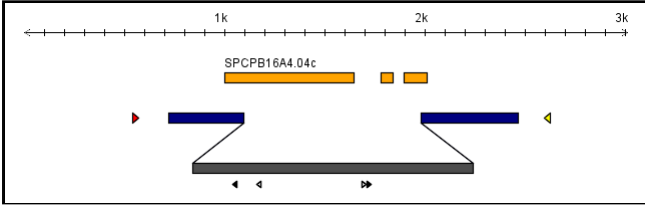

SPCPB16A4.05c

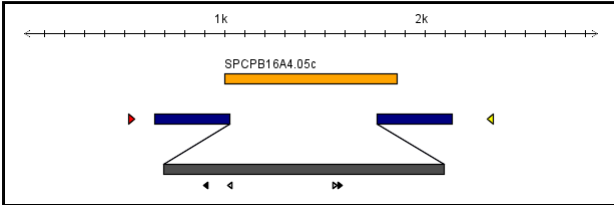

SPCPB16A4.06c

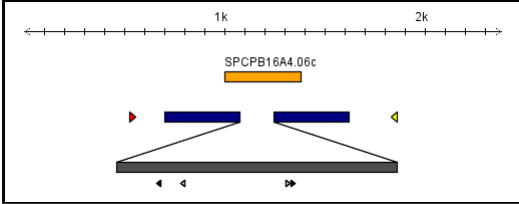

SPCPB1C11.01

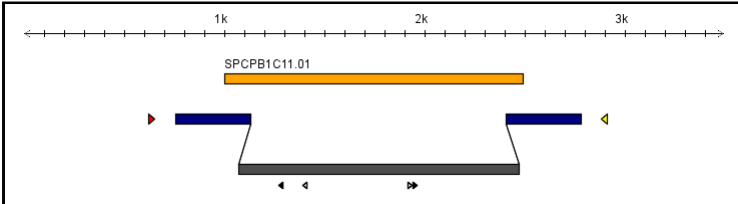

SPCPB1C11.02

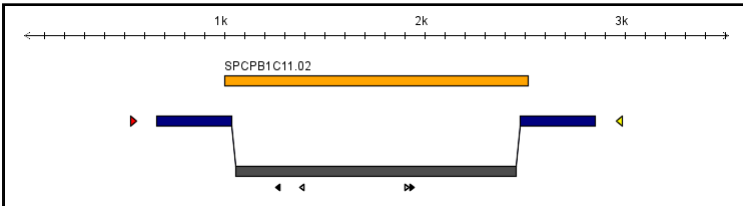

SPCPB1C11.03

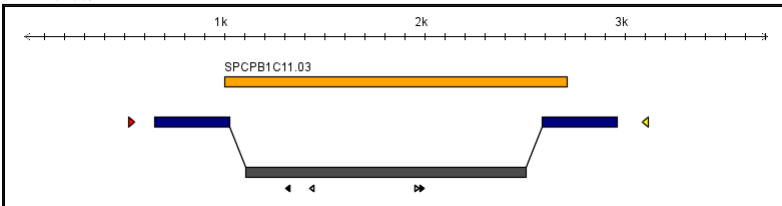

SPCPJ732.01

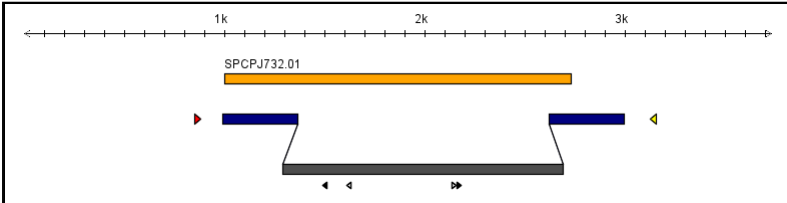

SPCPJ732.02c

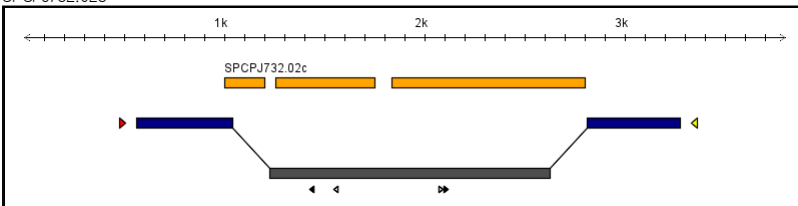

SPOC1020.02

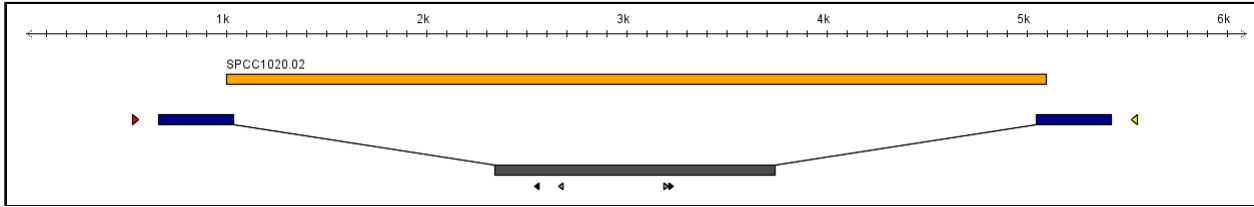

SPOC1020.11c

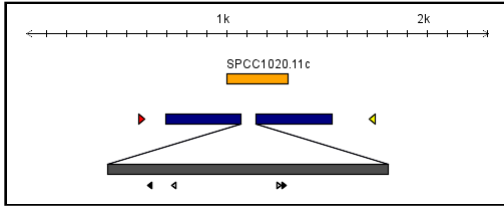

SPOC10H11.01

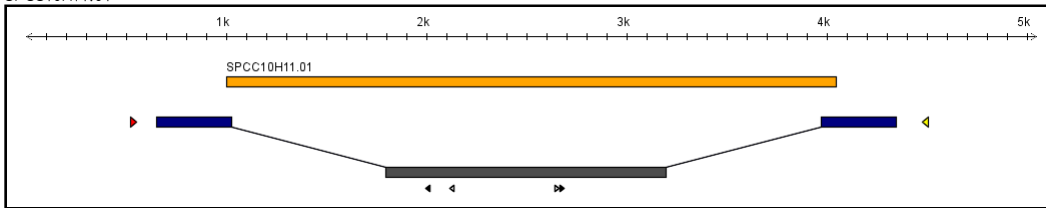

SPOC10H11.02

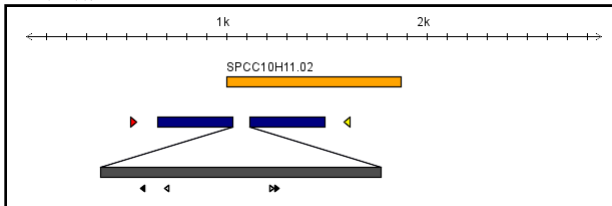

SPOC1183.05c

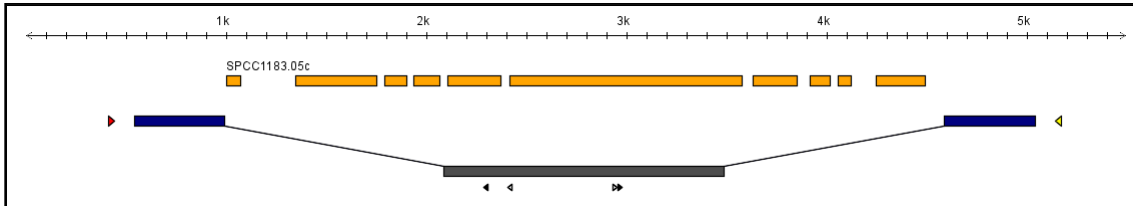

SPOC1183.11

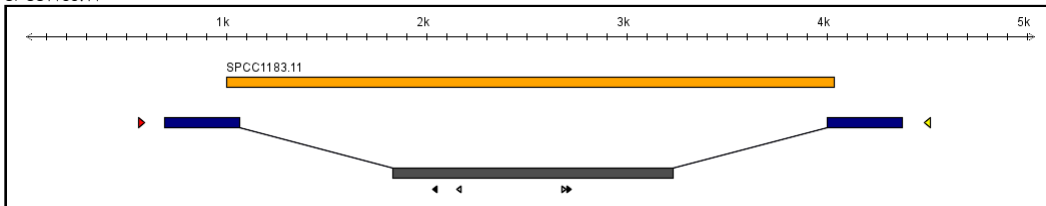

SPCC11E10.08

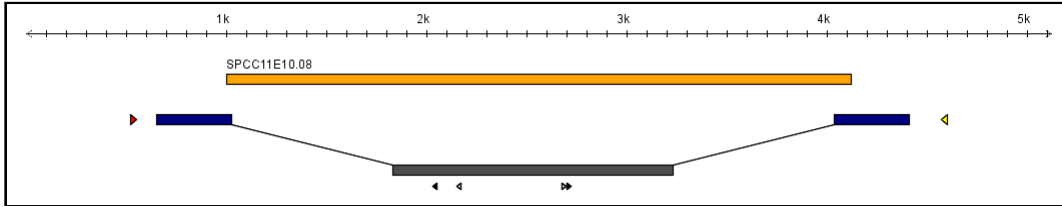

SPCC1223.01

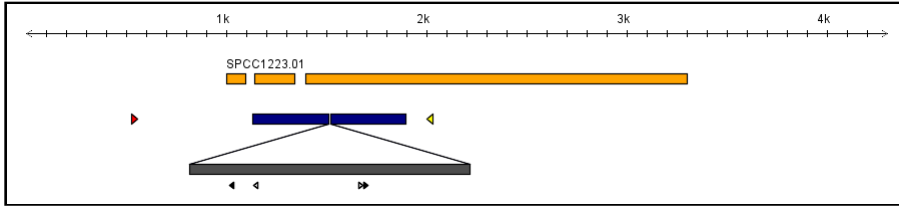

SPCC1223.05c

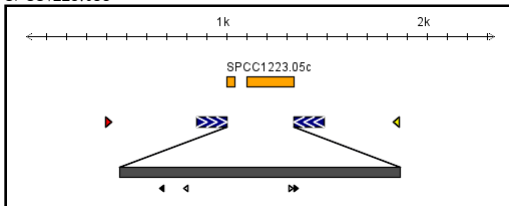

SPCC1223.06

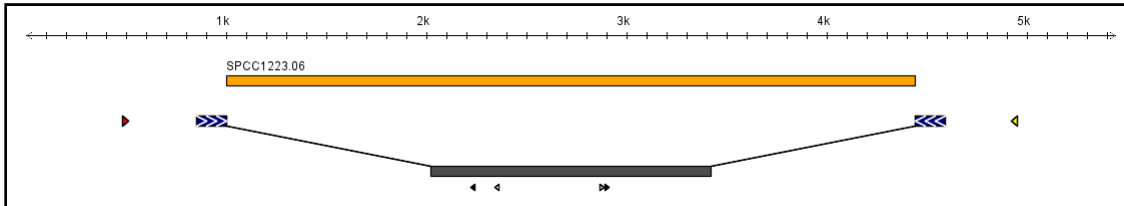

SPCC1223.13

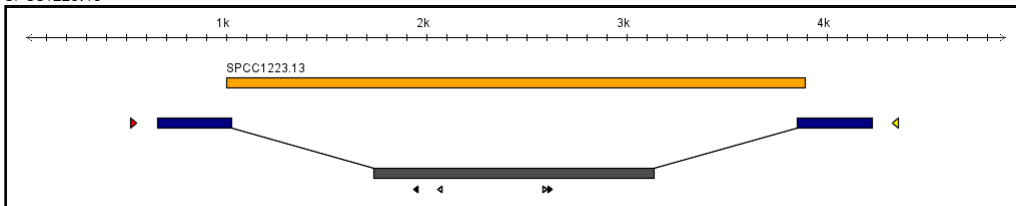

SPCC1223.14

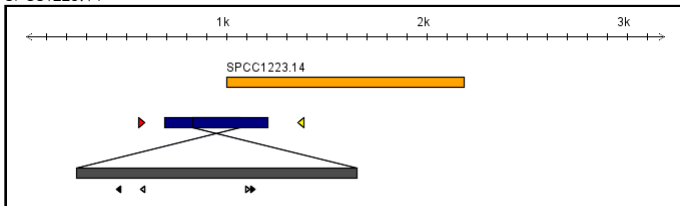



SPCC1235.05c

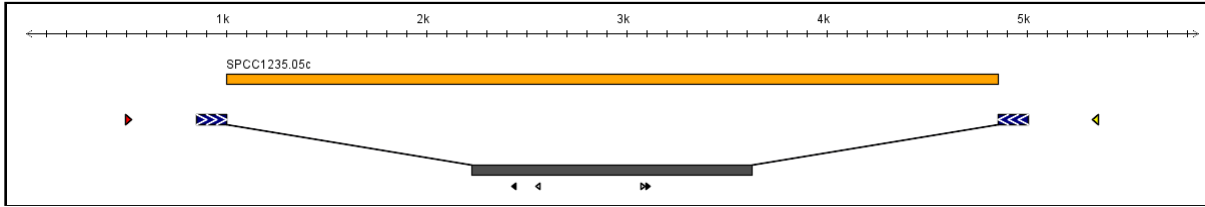

SPCC1235.15

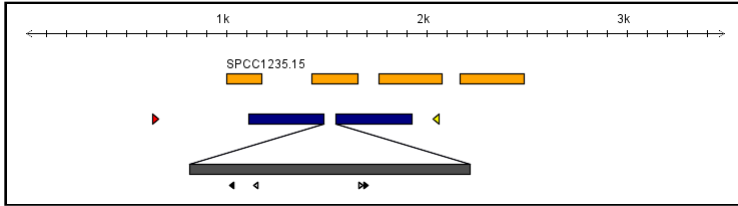

SPCC1259.01c

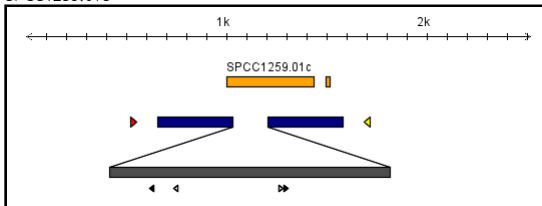

SPCC1259.02c

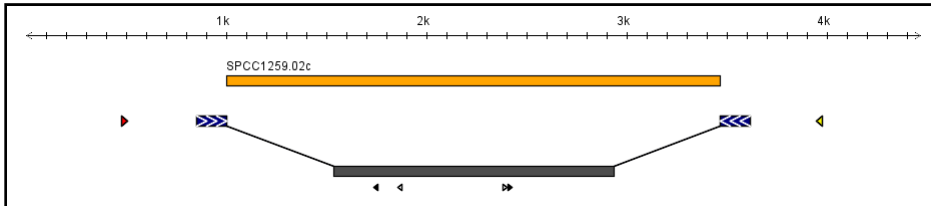

SPCC1259.05c

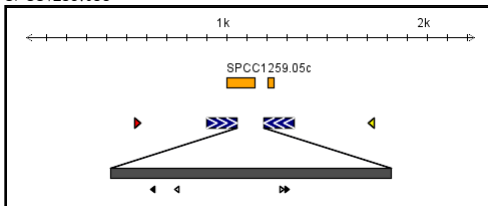

SPCC1259.11c

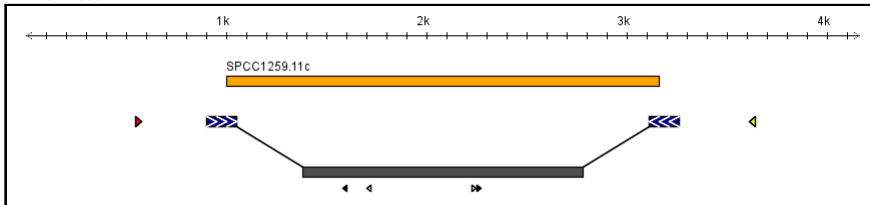

SPCC1281.01

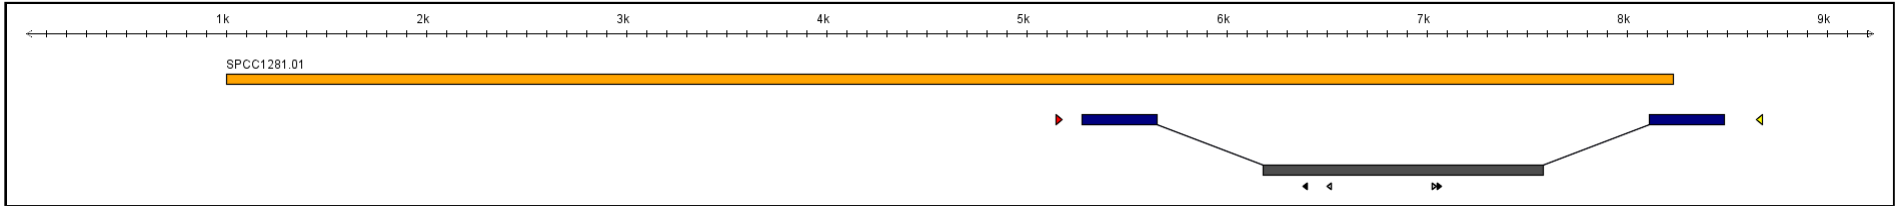

SPCC132.04c

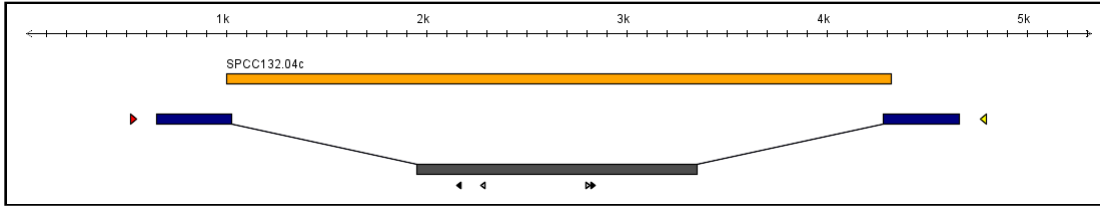

SPCC1322.03

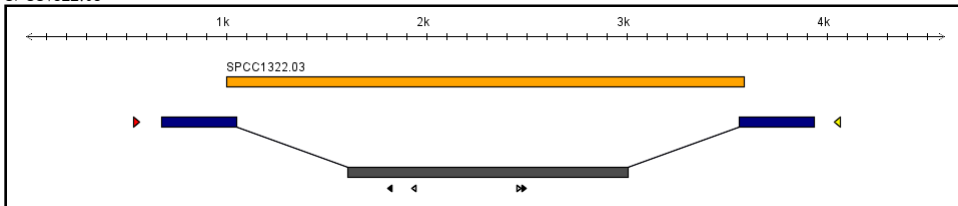

SPCC1322.06

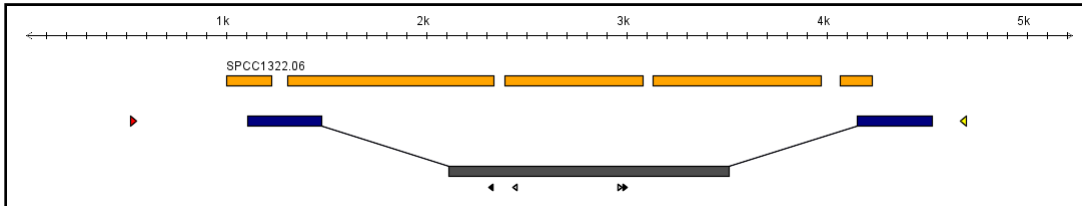

SPCC1322.08

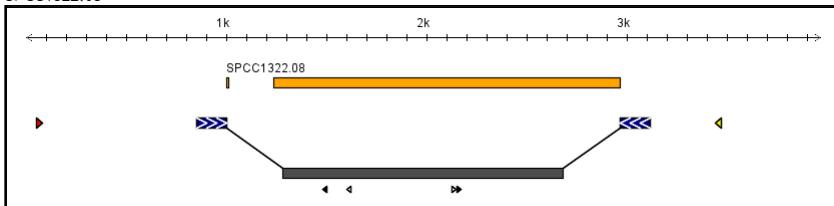

SPCC1322.12c

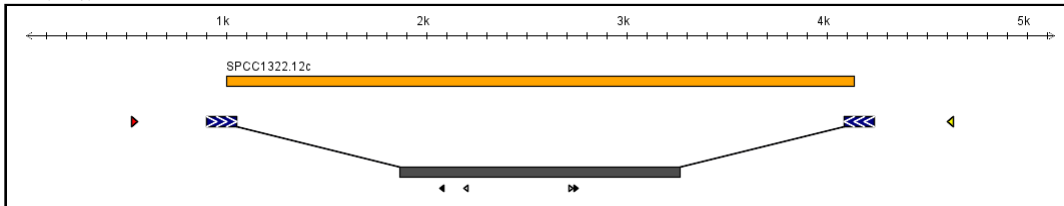

SPCC1322.14c

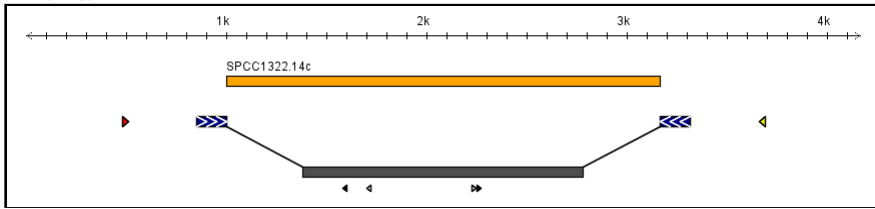

SPCC1393.05

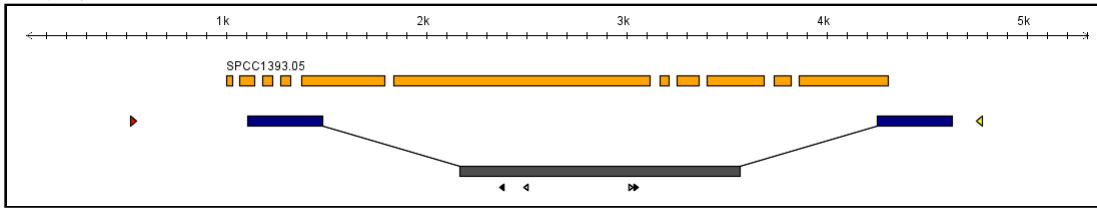

SPCC1393.07c

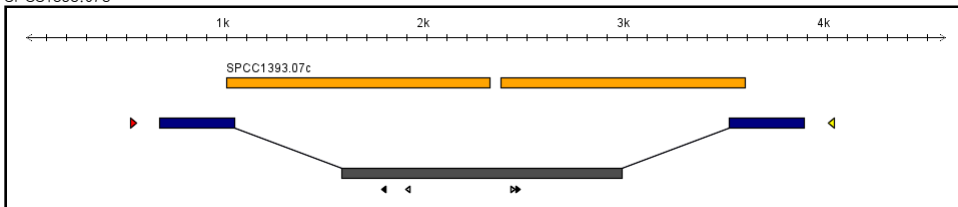

SPCC13B11.02c

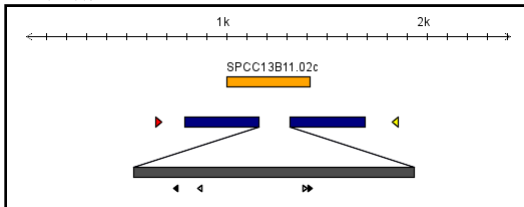

SPCC1442.01

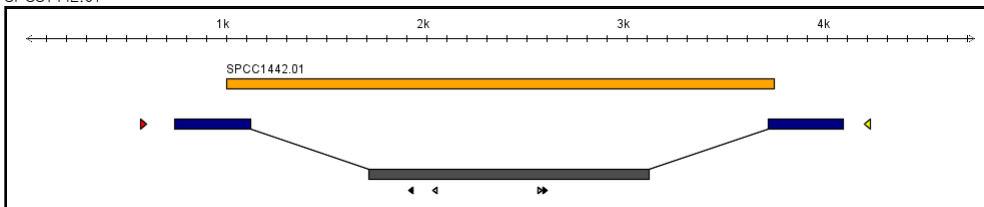

SPCC1450.11c

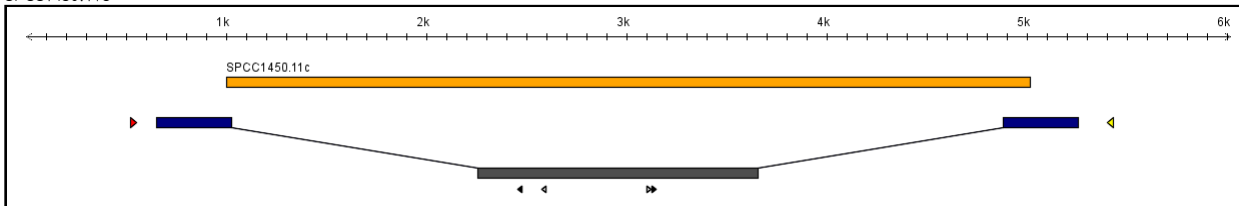

SPCC1450.12

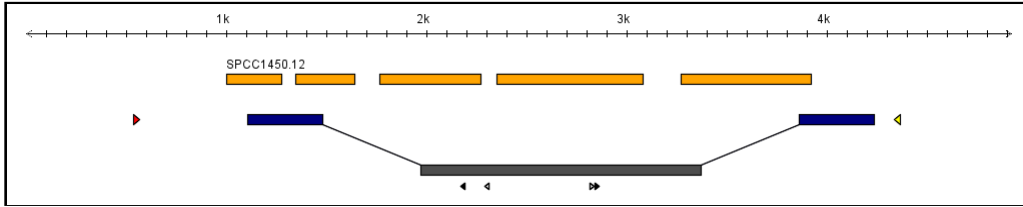

SPCC1494.07

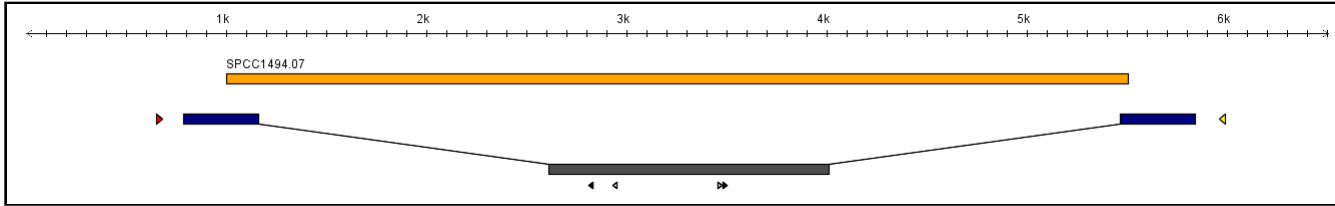

SPCC14G10.02

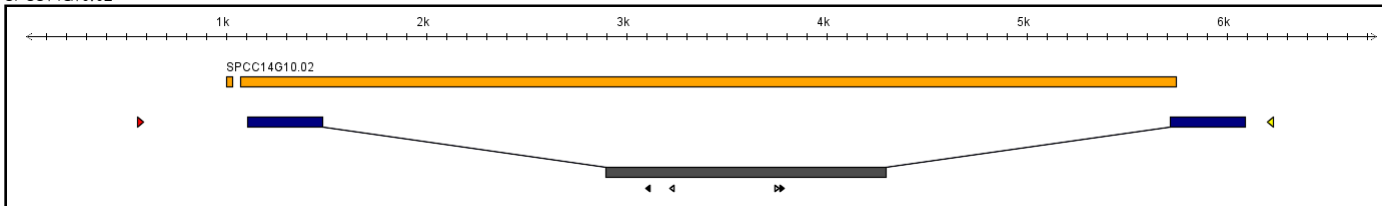

SPCC162.09c

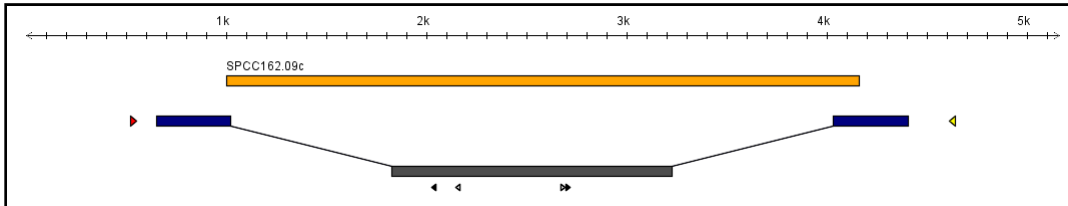

SPCC1620.11

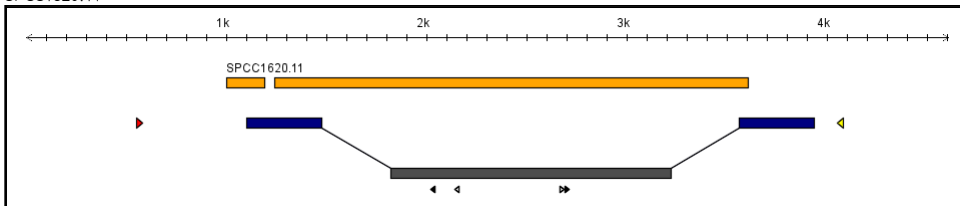

SPCC1620.14c

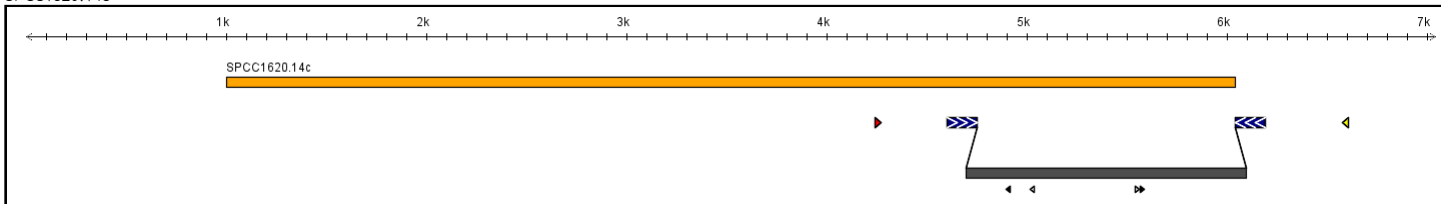

SPCC1672.11c

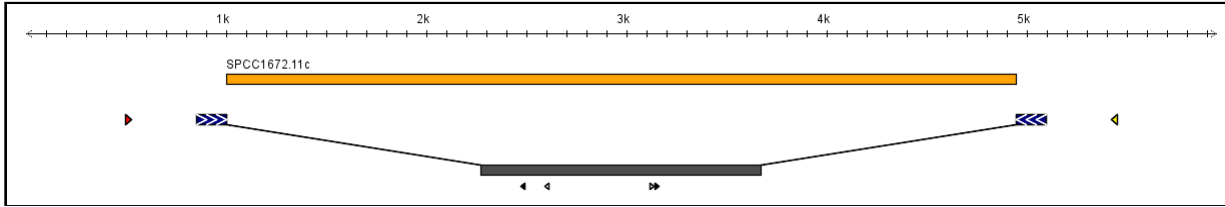

SPCC1682.02c

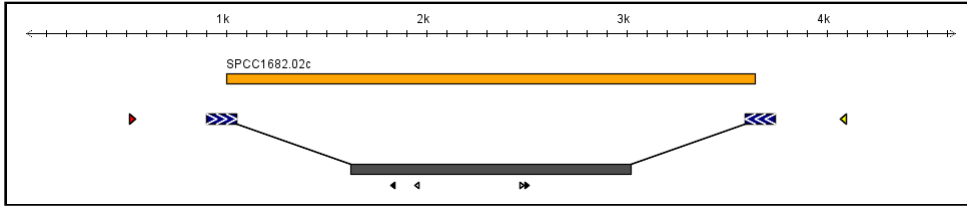

SPCC1682.08c

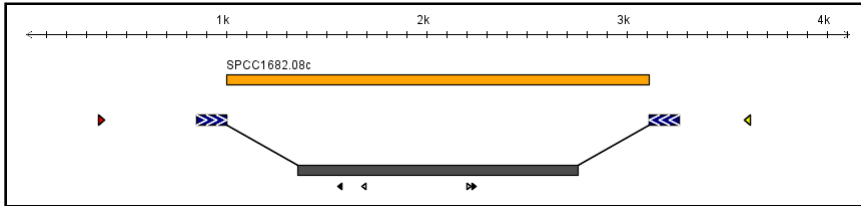

SPCC16A11.12c

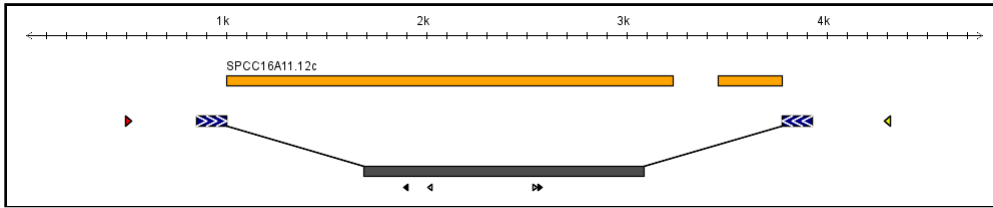

SPCC16C4.05

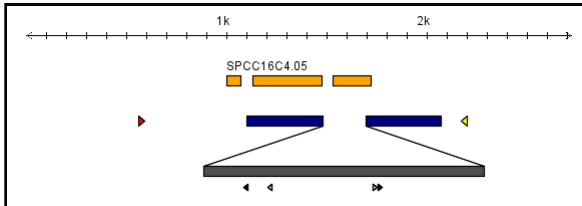

SPCC16C4.14c

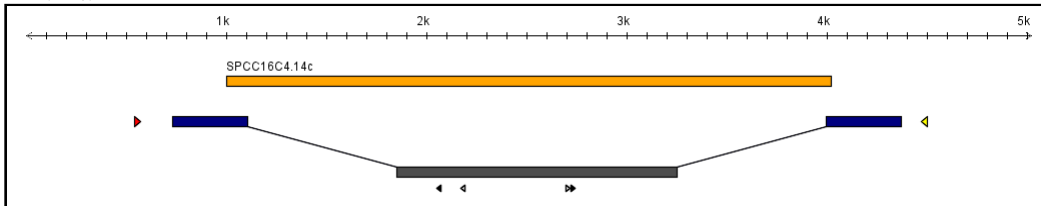

SPCC1739.01

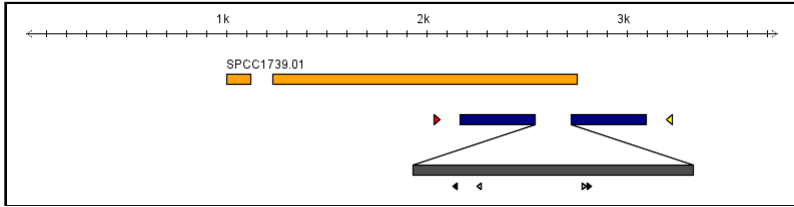

SPCC1739.03

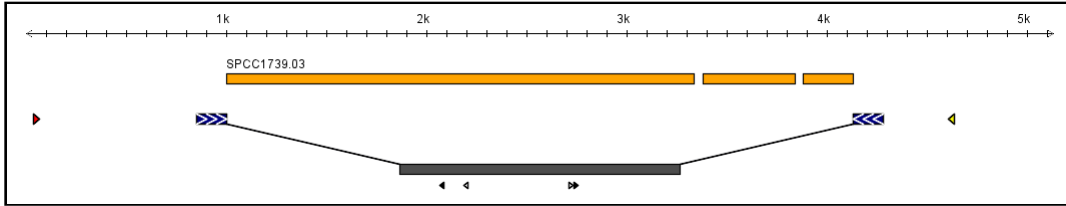

SPCC1739.09c

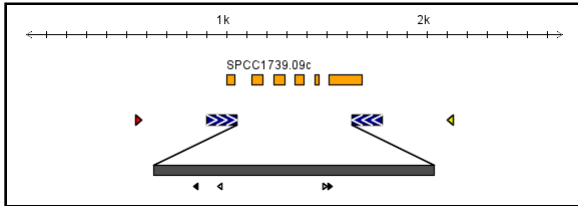

SPCC1739.11c

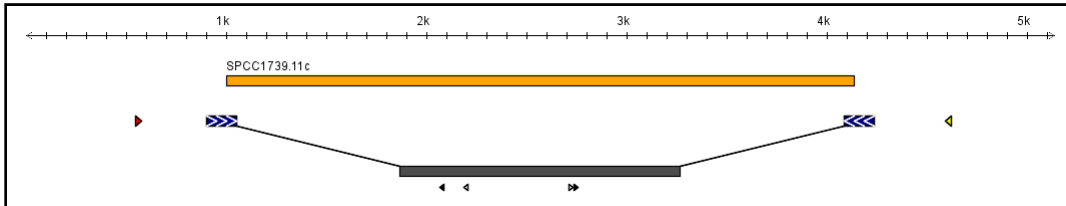

SPCC1739.14

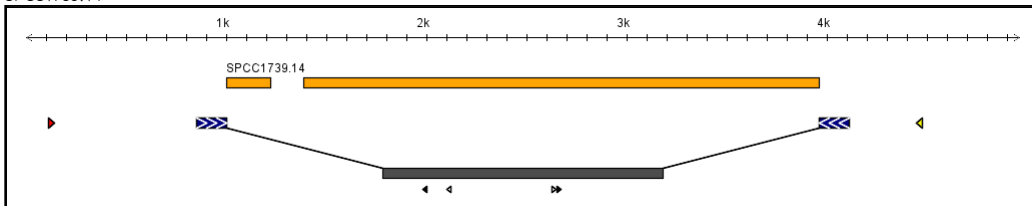

SPCC1742.01

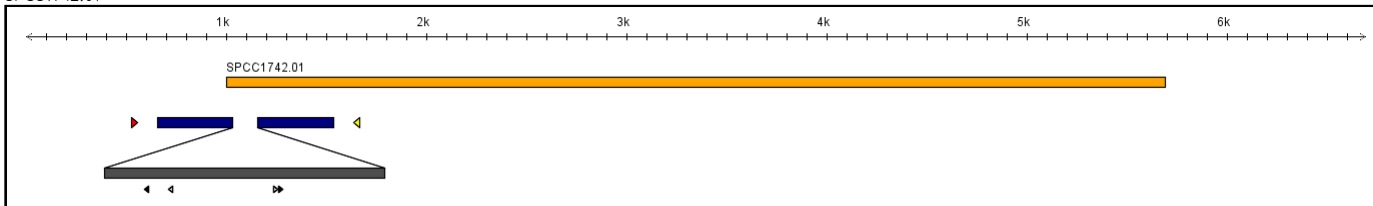

SPCC1753.01c

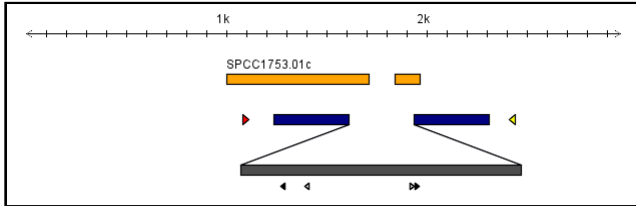

SPCC1795.01c

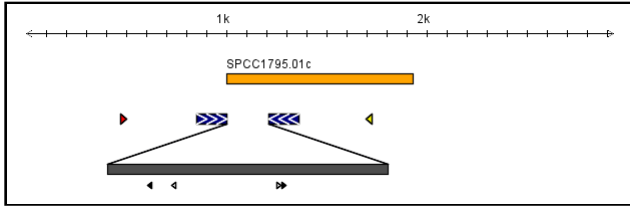

SPCC1795.08c

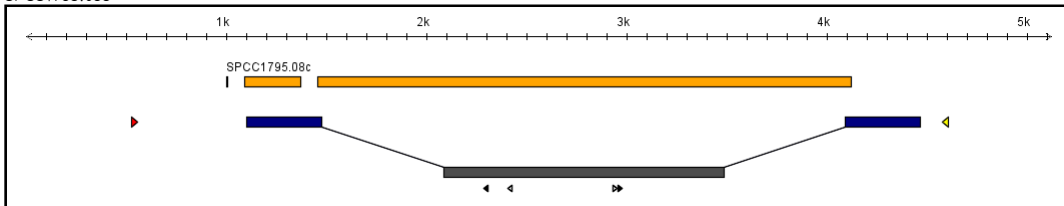

SPCC18.01c

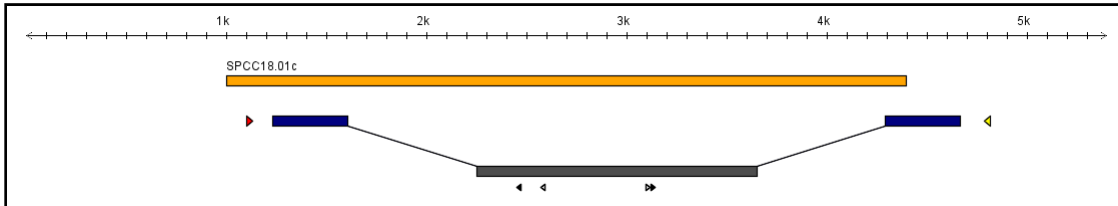

SPCC18.03

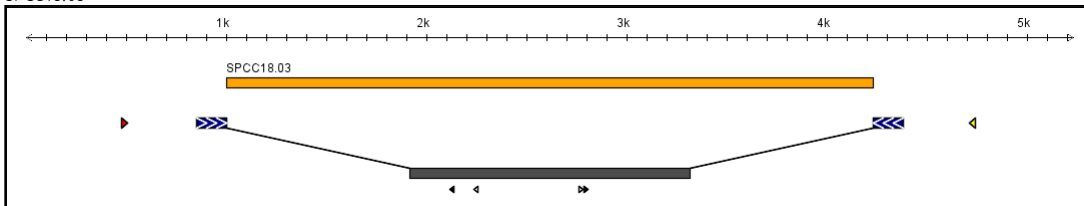

SPCC1827.07c

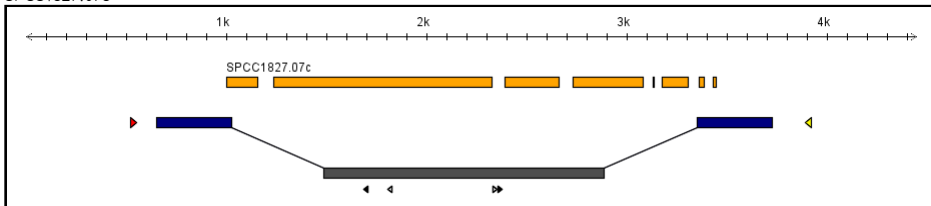

SPCC1840.03

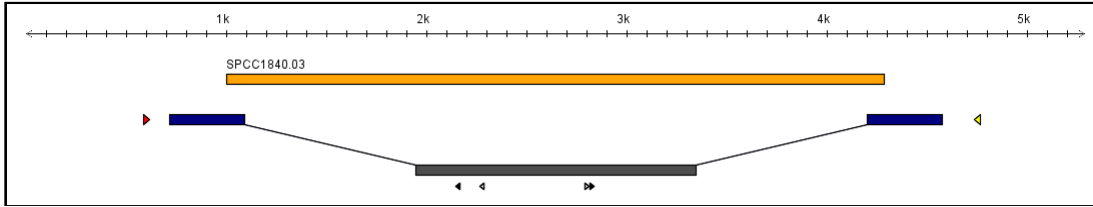

SPCC1840.12

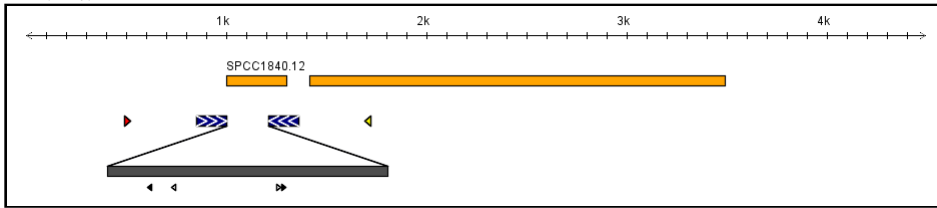

SPCC188.06c

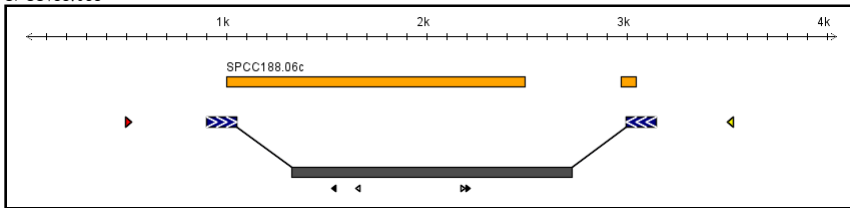

SPCC188.08c

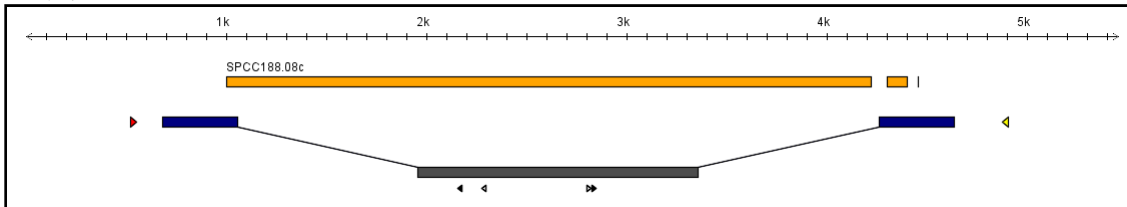

SPCC188.13c

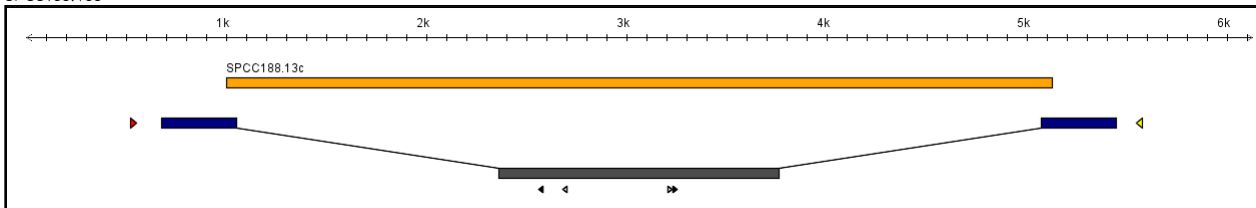

SPCC18B5.03

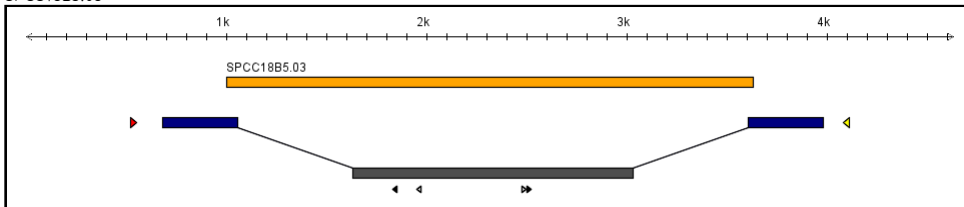



SPCC18B5.09c

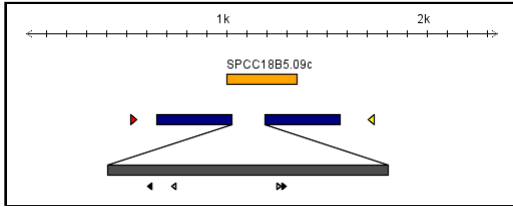

SPCC1902.01

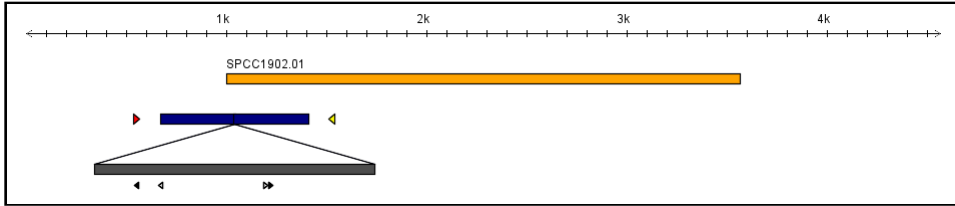

SPCC1919.05

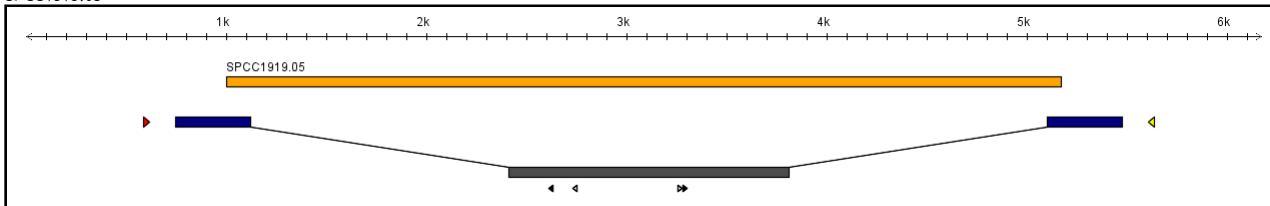

SPCC23B6.04c

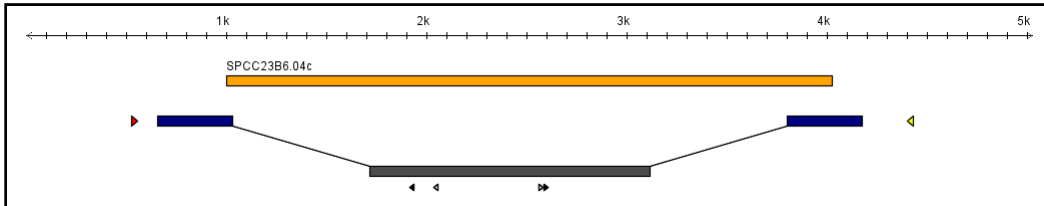

SPCC24B10.05

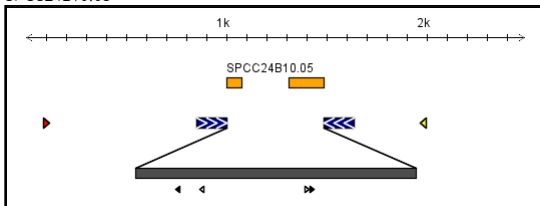

SPCC285.14

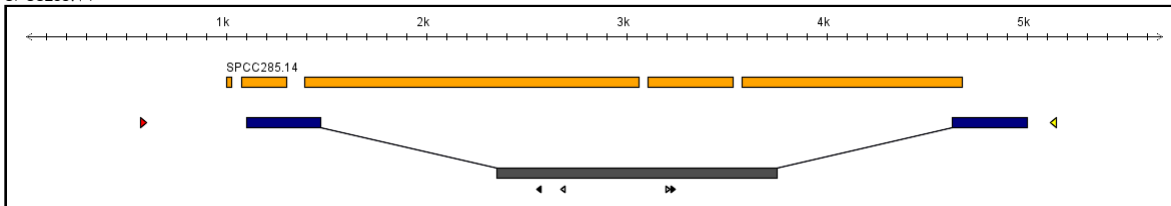

SPCC285.16c

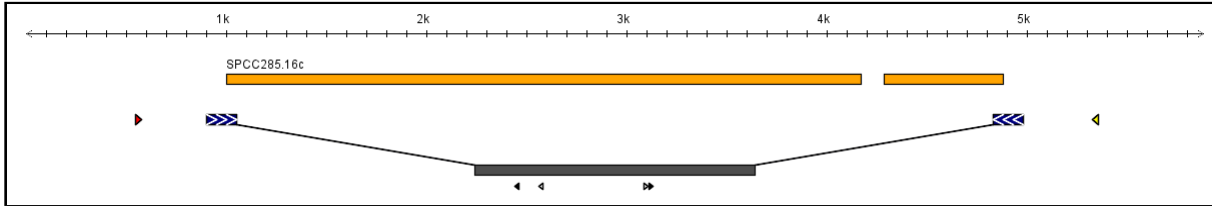

SPCC306.04c

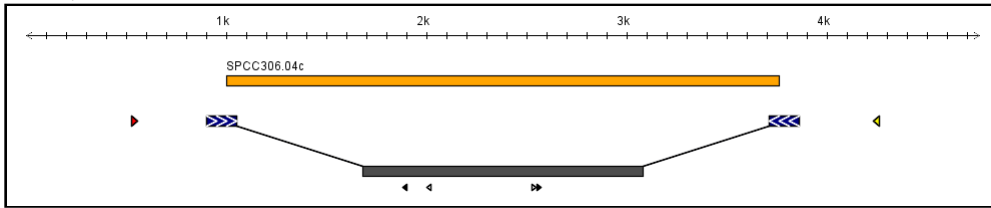

SPCC320.07c

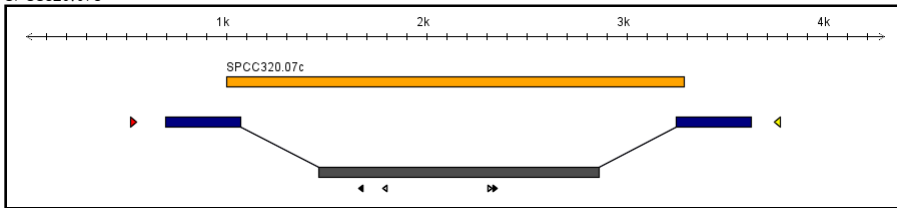

SPCC330.01c

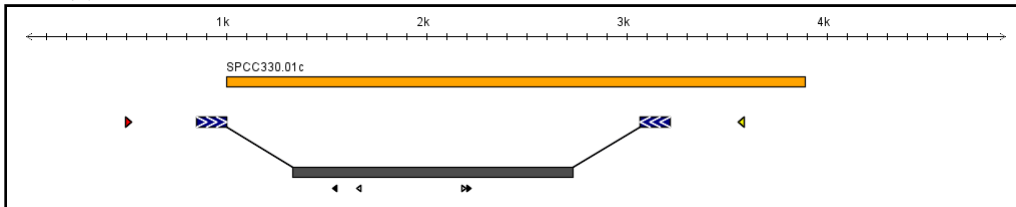

SPCC330.11

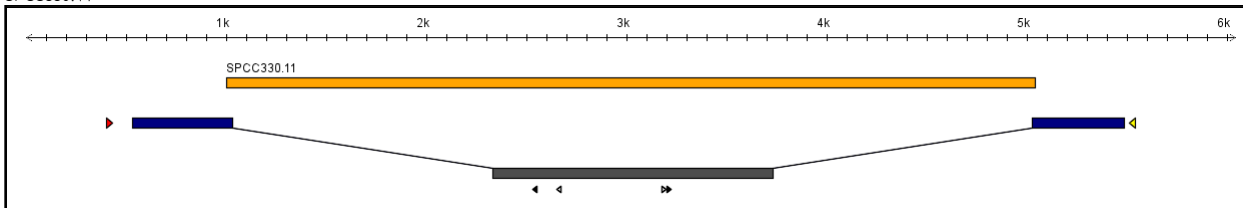

SPCC338.17c

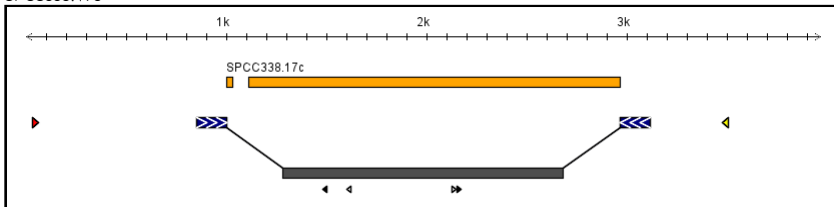

SPCC364.07

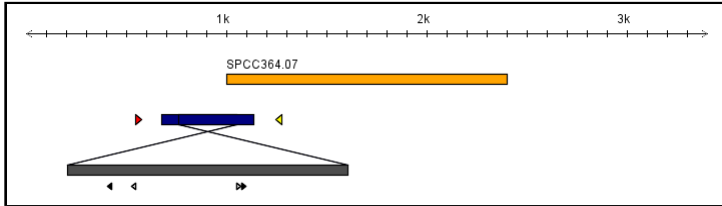

SPCC417.06c

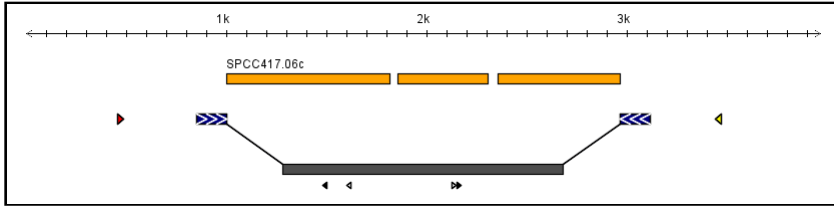

SPCC417.07c

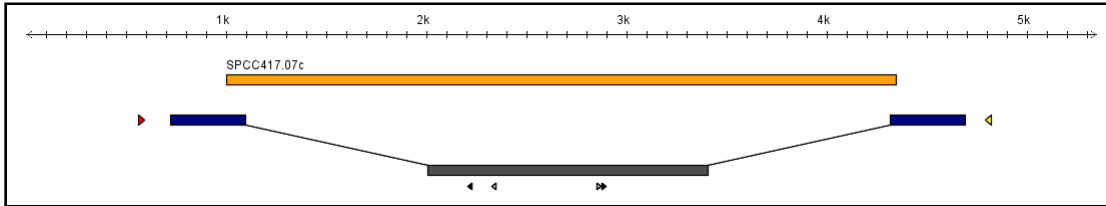

SPCC417.08

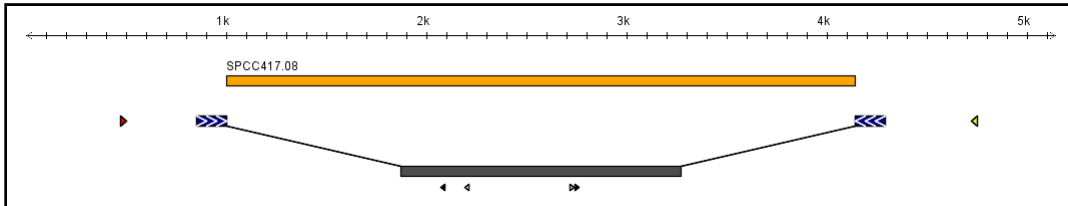

SPCC417.09c

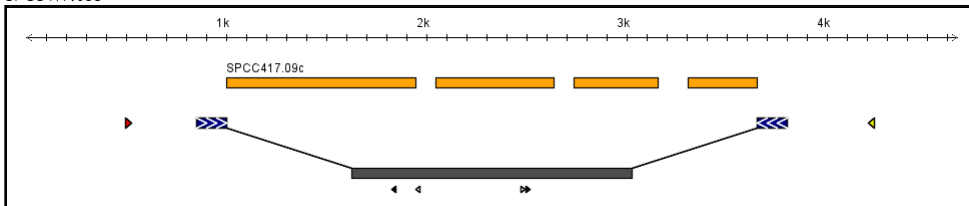

SPCC4E9.01c

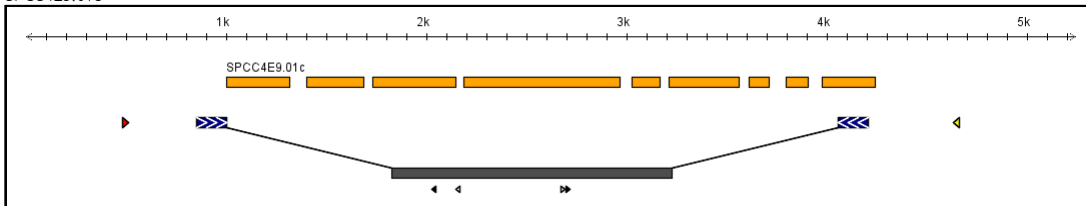

SPCC4G3.12c

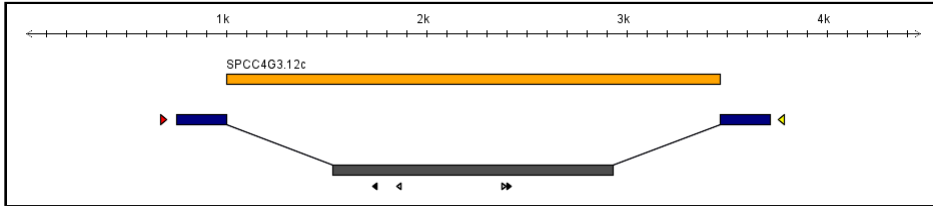

SPCC4G3.18

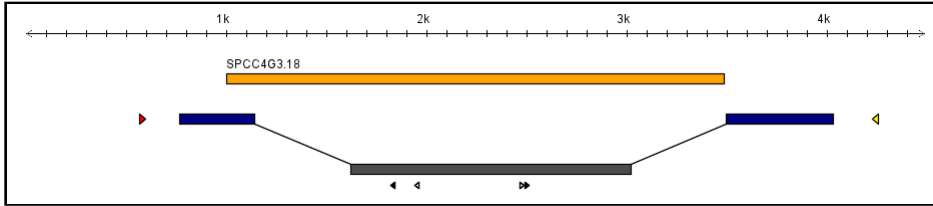

SPCC550.03c

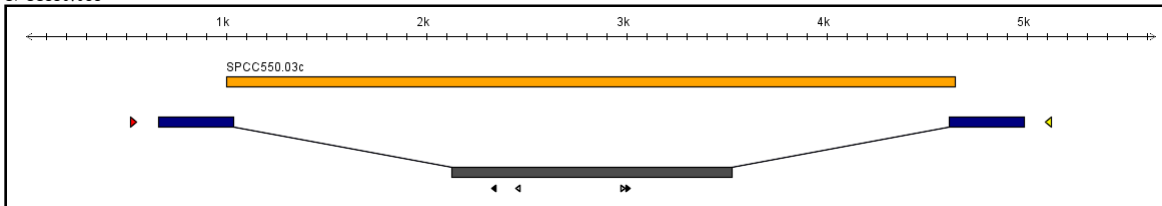

SPCC550.06c

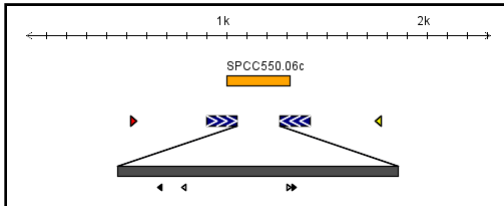

SPCC550.11

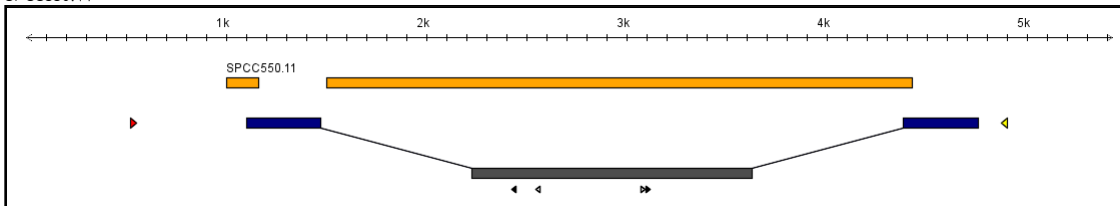

SPCC550.14

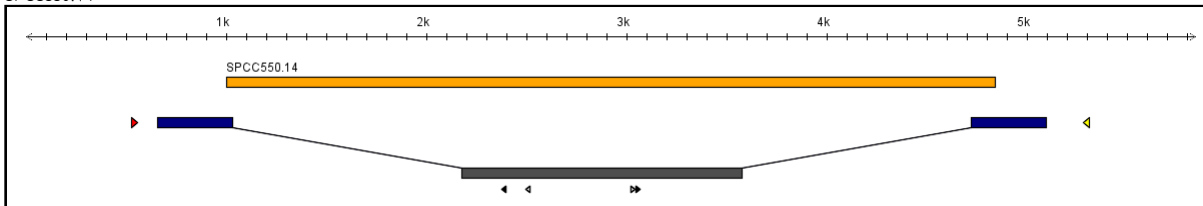

SPCC553.03

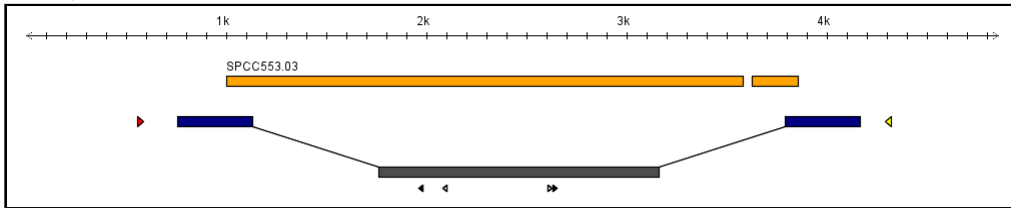

SPCC553.09c

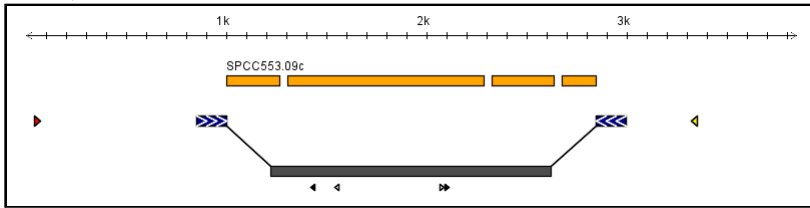

SPCC569.04

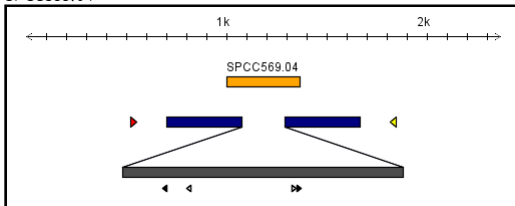

SPCC576.05

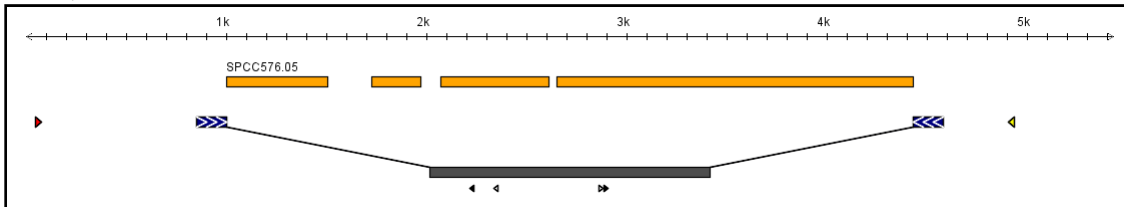

SPCC576.09

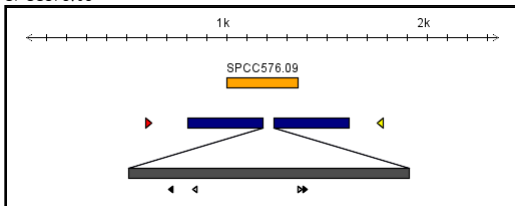

SPCC584.01c

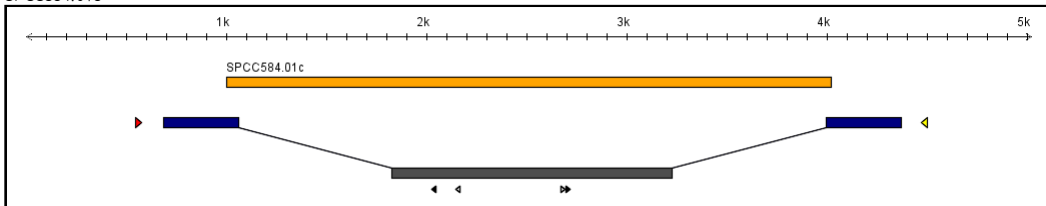

SPCC584.04

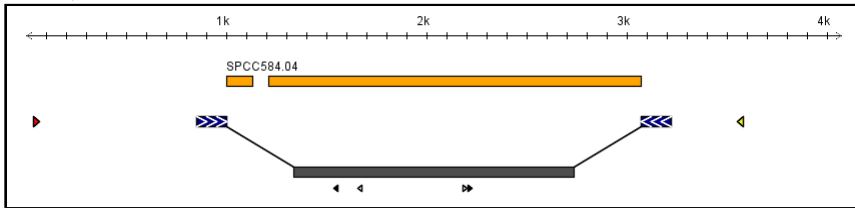

SPCC584.15c

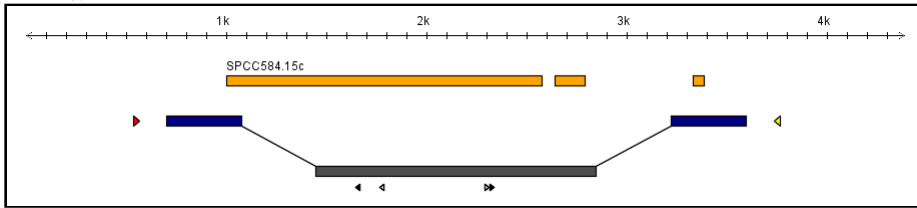

SPCC5E4.06

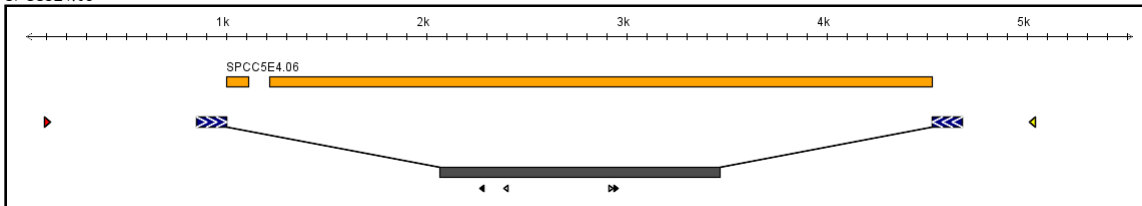

SPCC61.01c

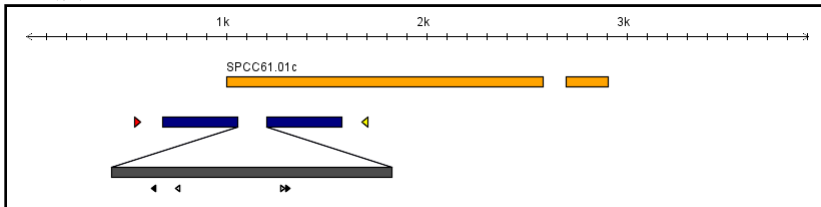

SPCC613.01

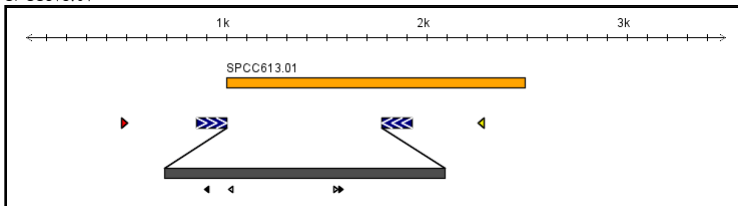

SPCC613.04c

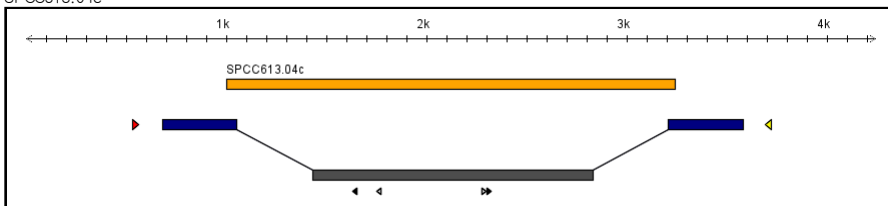

SPCC622.10c

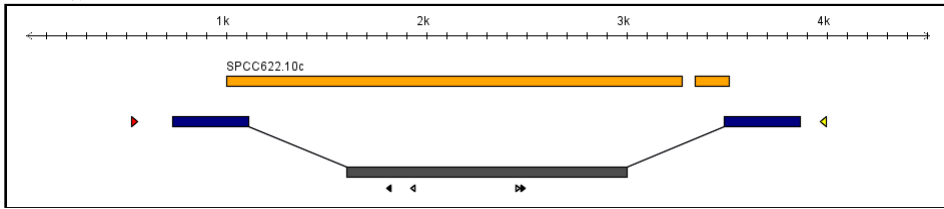

SPCC622.13c

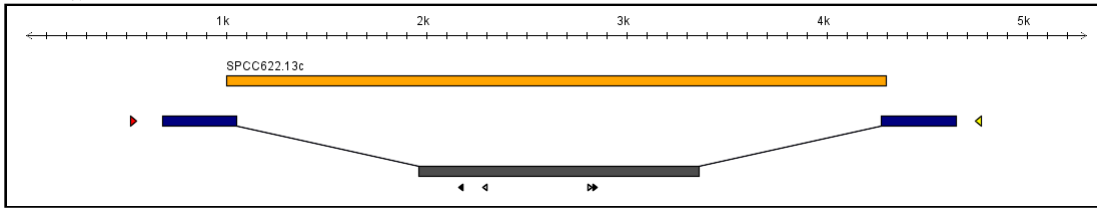

SPCC622.16c

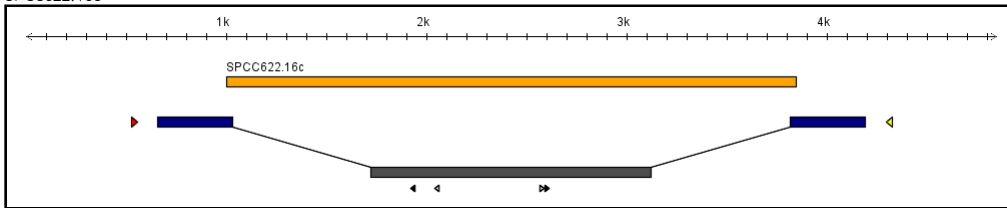

SPCC63.04

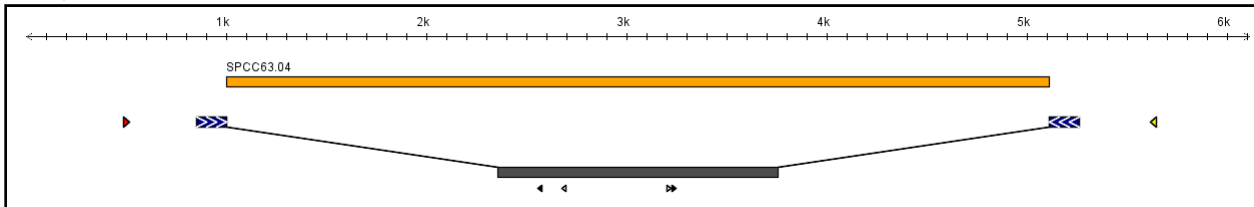

SPCC63.14

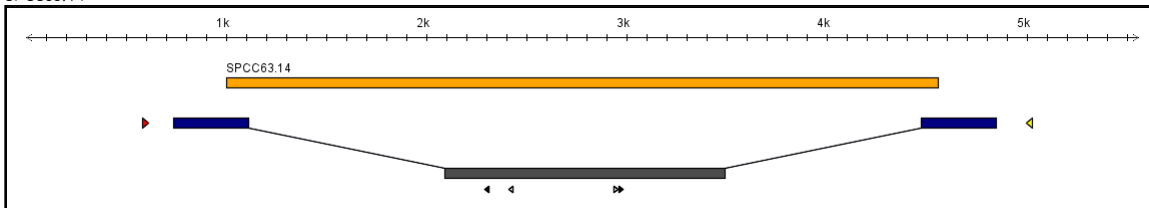

SPCC645.05c

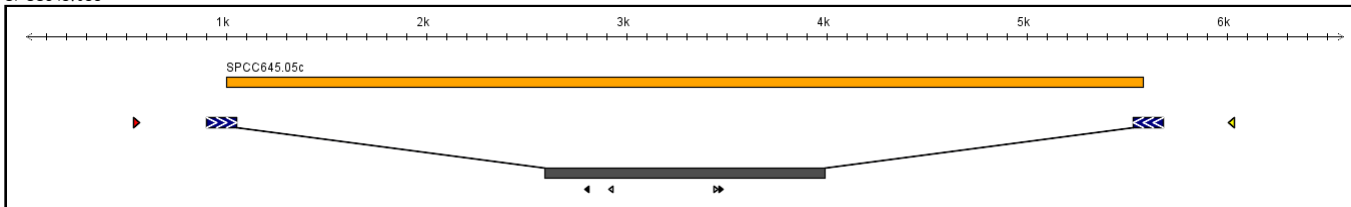

SPCC645.06c

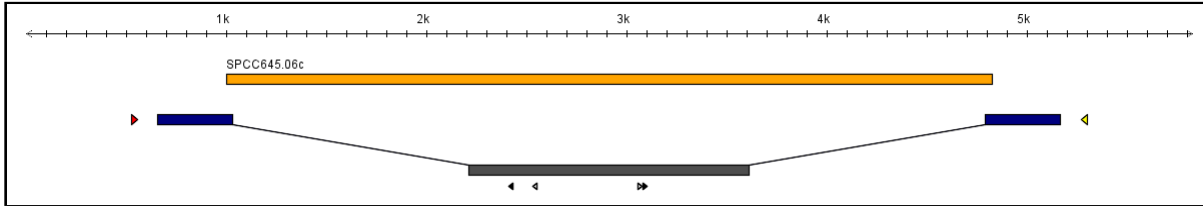

SPCC645.07

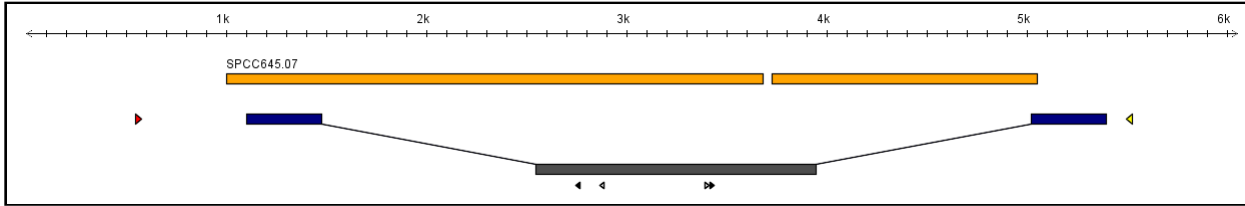

SPCC645.13

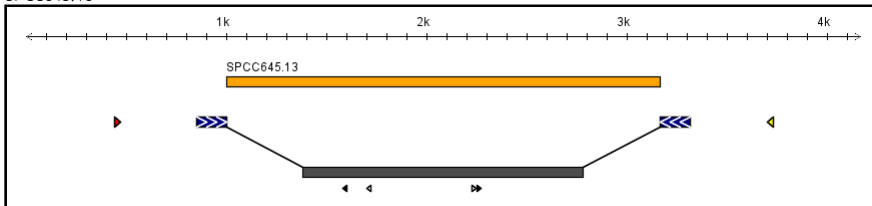

SPCC663.03

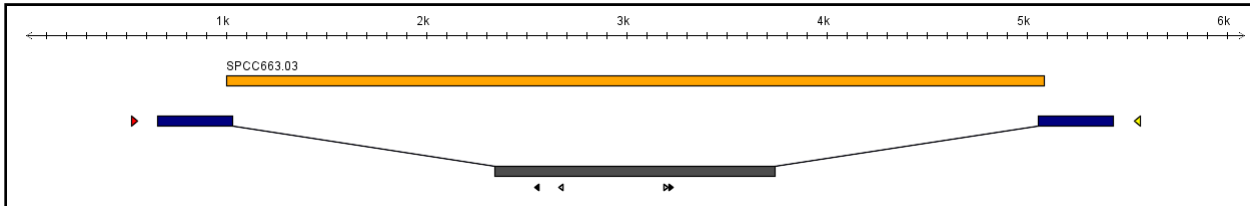

SPCC70.05c

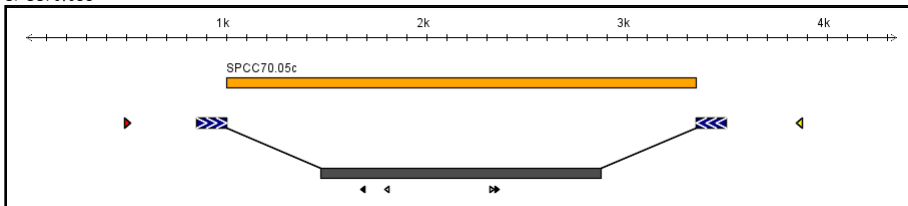

SPCC736.05

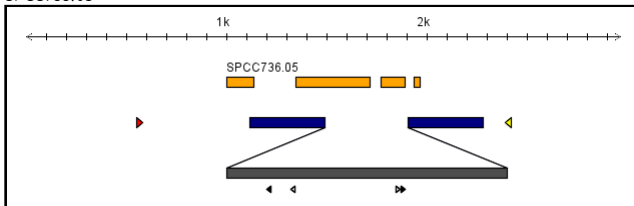



SPCC736.06

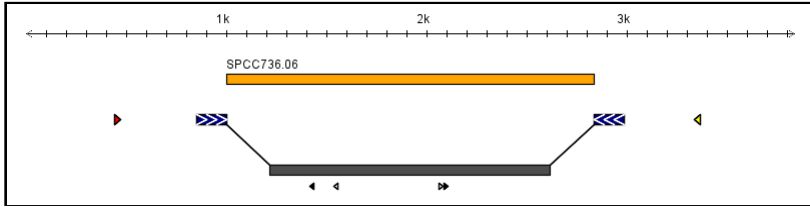

SPCC736.11

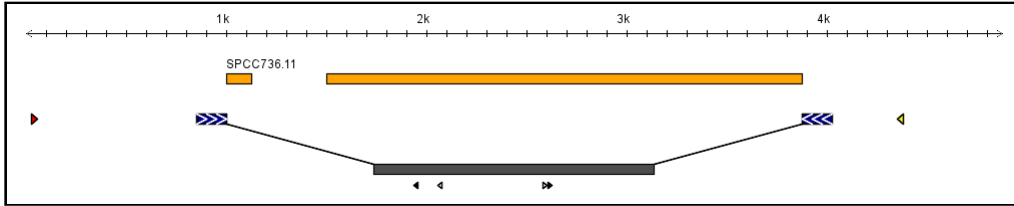

SPCC736.14

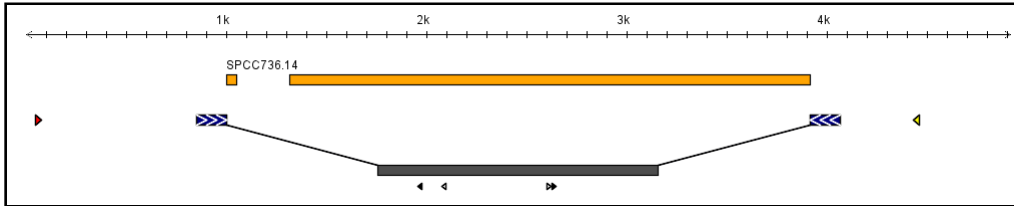

SPCC757.04

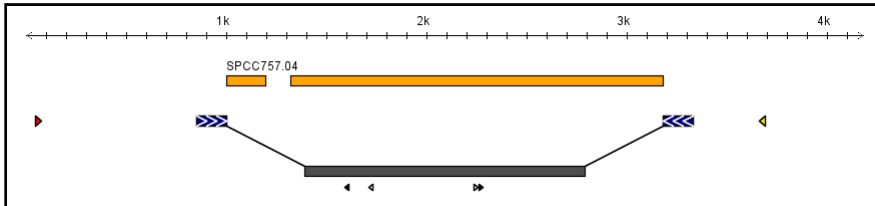

SPCC790.02

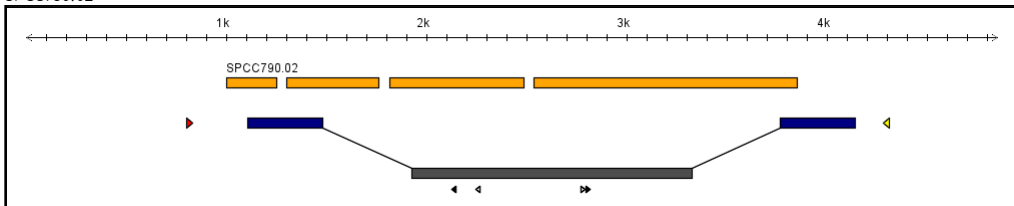

SPCC825.01

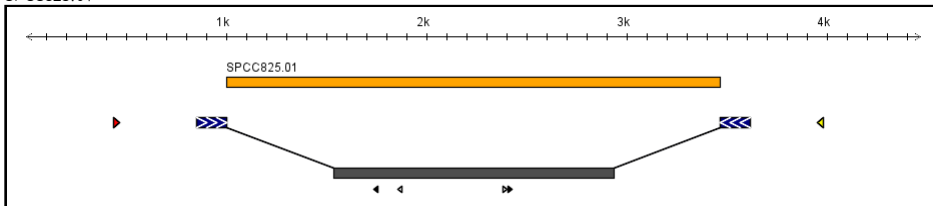

SPCC830.06

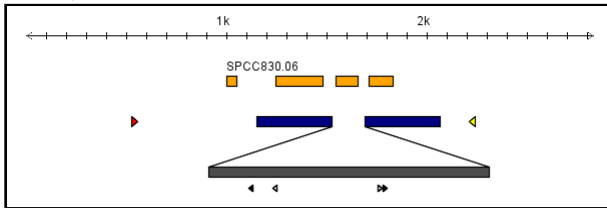

SPCC895.05

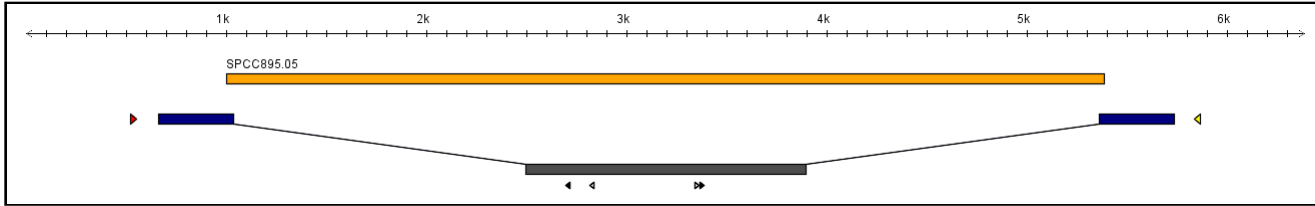

SPCC895.07

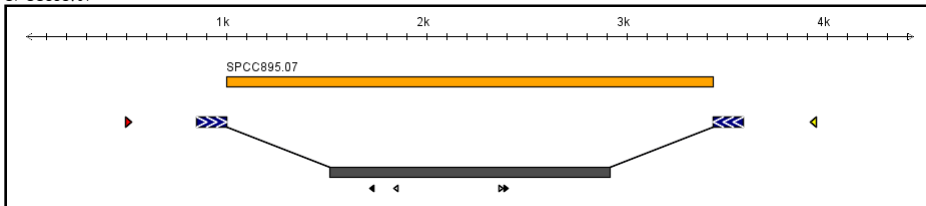

SPCC895.09c

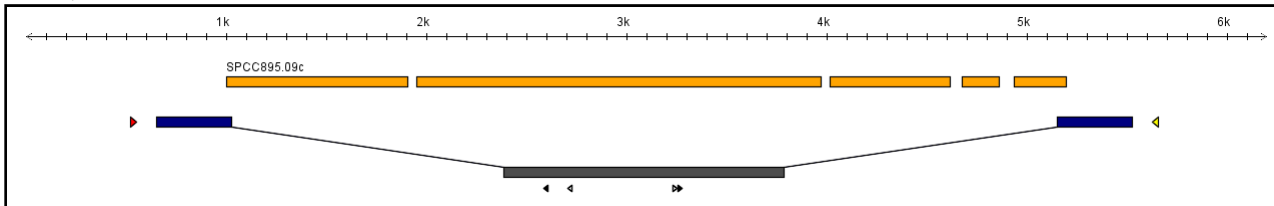

SPCC962.01

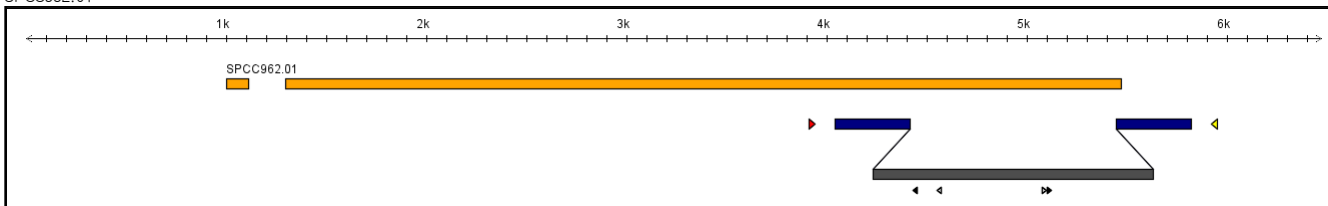

SPCC962.02c

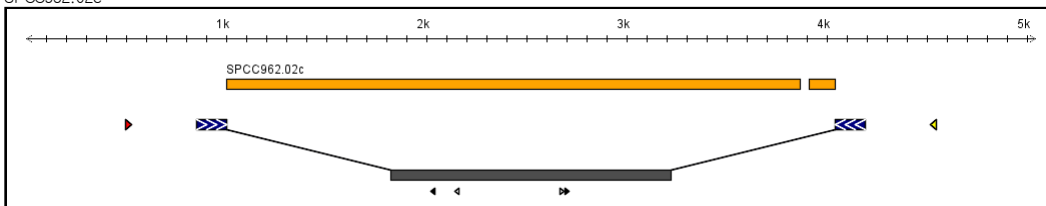

SPCC965.04c

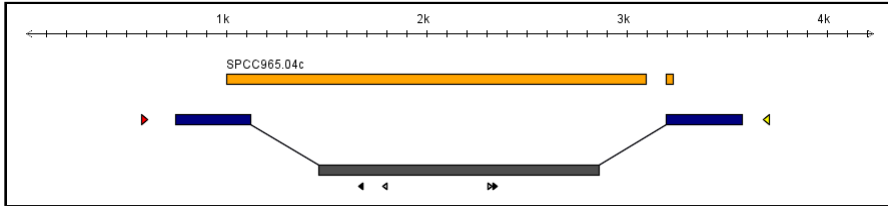

SPCC970.01

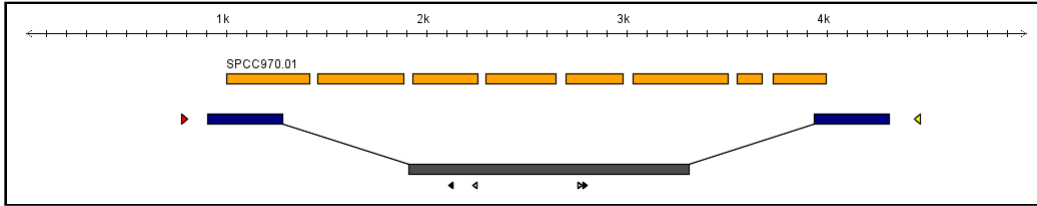

SPCC970.08

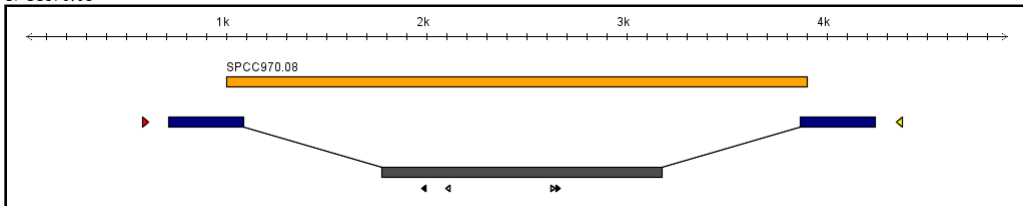

SPCC970.09

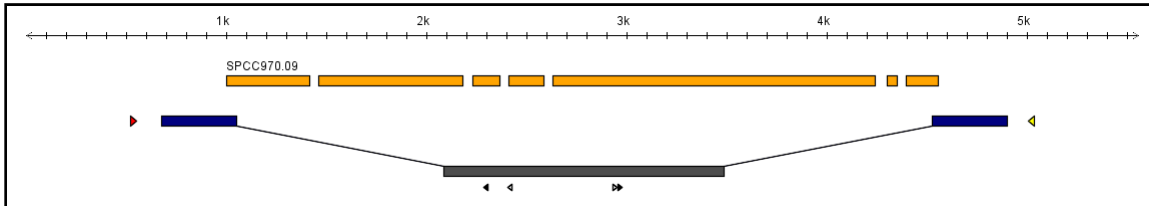

SPCP1E11.06

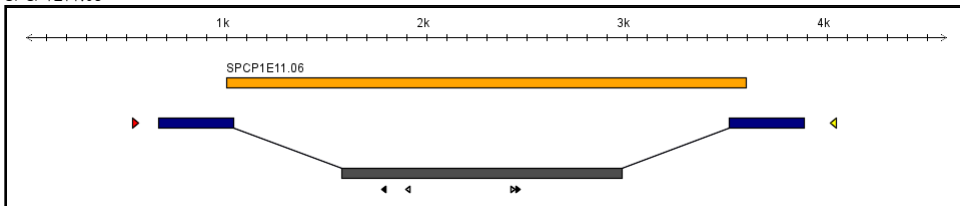

SPCP25A2.02c

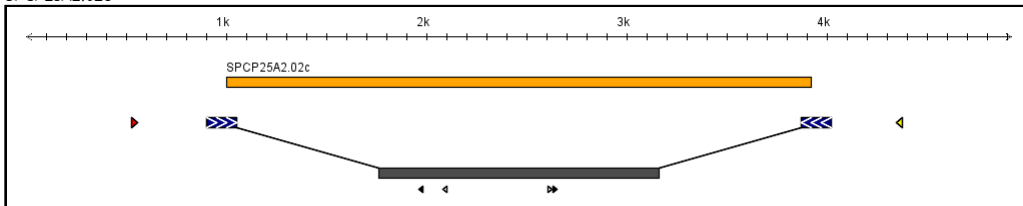

SPCP31B10.06

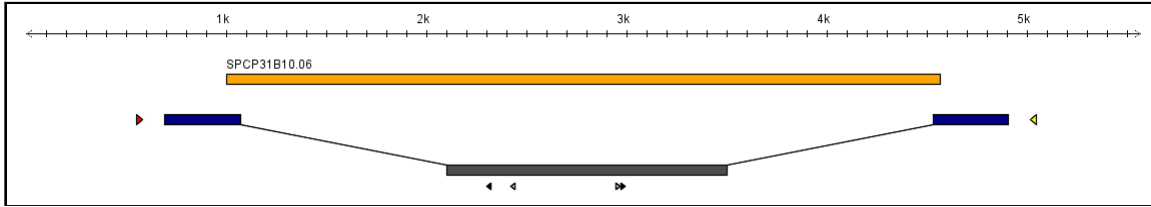

SPCP31B10.07

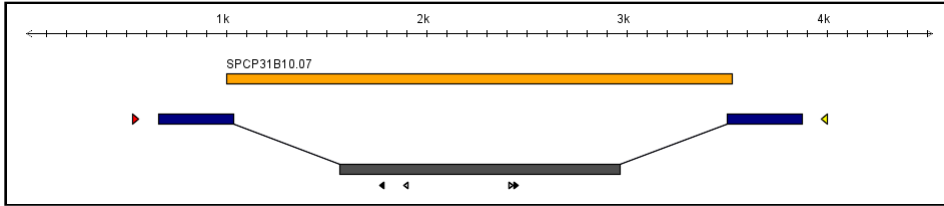

SPCC1183.07

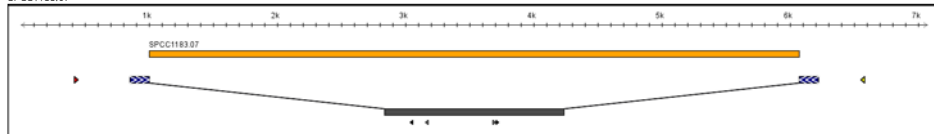

SPCC162.08c

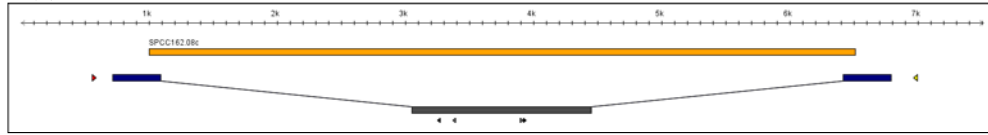

SPCC1919.10c

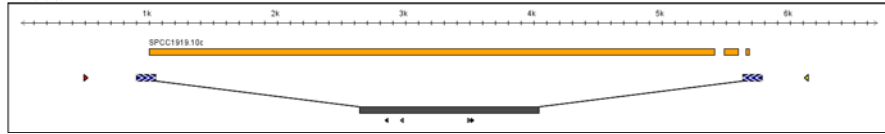

SPCC2386.03c

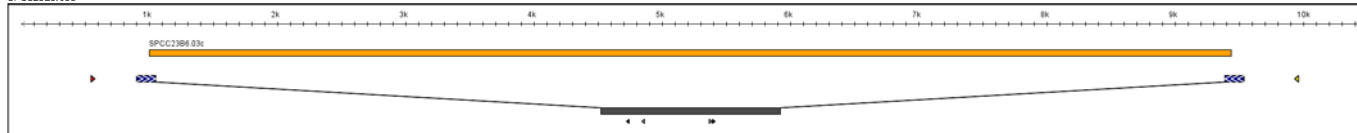

SPCC290.03c

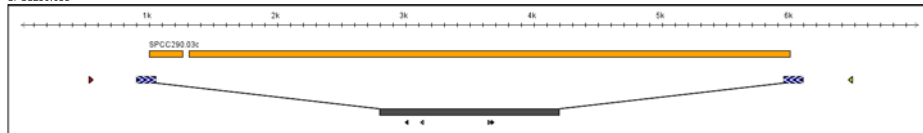

SPCC5E4.04

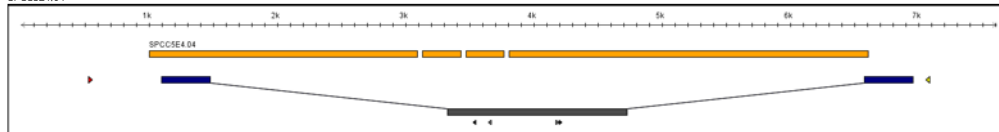

SPCC737.08

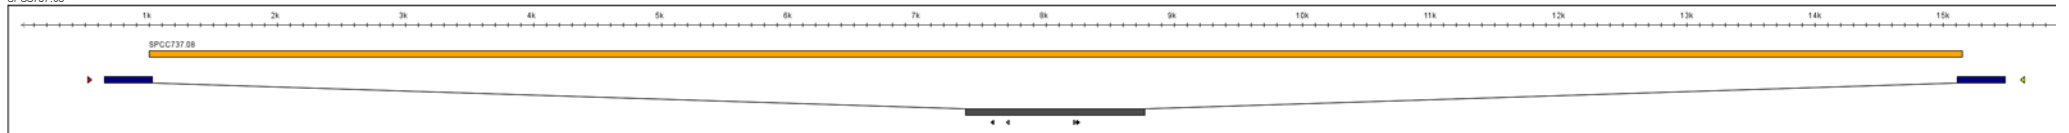

SPCC74.06

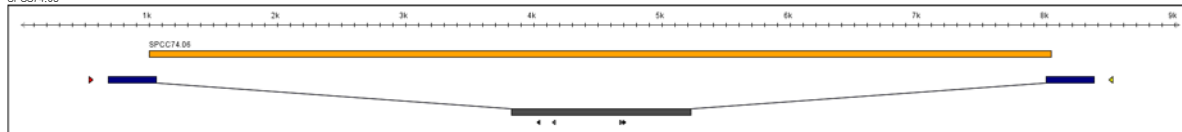

Supplement: NIHMS57310-supplement-supplementary_data_2.pdf [file NIHMS57310-supplement-supplementary_data_2.pdf]
